# Supplementary material
Source: publisher site journal article supplement (https://www.dovepress.com/article/431076)
Supplement: Supplementary file 1 [file get_supplementary_file.php]

**Supplementary Table 1:** Sample information of GSE152805

| Cell annotation                | Sample     | Class  |
|--------------------------------|------------|--------|
| GSM4626766_AAACCTGAGATGGGTC-1  | GSM4626766 | Normal |
| GSM4626766_AAACCTGAGCGTGAGT-1  | GSM4626766 | Normal |
| GSM4626766_AAACCTGAGCGTGTCC-1  | GSM4626766 | Normal |
| GSM4626766_AAACCTGAGCTCCTCT-1  | GSM4626766 | Normal |
| GSM4626766_AAACCTGAGGCATGGT-1  | GSM4626766 | Normal |
| GSM4626766_AAACCTGAGTCTTGCA-1  | GSM4626766 | Normal |
| GSM4626766_AAACCTGAGTGTTGAA-1  | GSM4626766 | Normal |
| GSM4626766_AAACCTGCAGTGGAGT-1  | GSM4626766 | Normal |
| GSM4626766_AAACCTGCATACCATG-1  | GSM4626766 | Normal |
| GSM4626766_AAACCTGCATGCGCAC-1  | GSM4626766 | Normal |
| GSM4626766_AAACCTGCATTCTGC-1   | GSM4626766 | Normal |
| GSM4626766_AAACCTGGTAACGTTT-1  | GSM4626766 | Normal |
| GSM4626766_AAACCTGGTAAGGGCT-1  | GSM4626766 | Normal |
| GSM4626766_AAACCTGGTCTGCGGT-1  | GSM4626766 | Normal |
| GSM4626766_AAACCTGGTTAGGGTG-1  | GSM4626766 | Normal |
| GSM4626766_AAACCTGGTTCACGGC-1  | GSM4626766 | Normal |
| GSM4626766_AAACCTGGTTCCTTG-1   | GSM4626766 | Normal |
| GSM4626766_AAACCTGTCCATGAAC-1  | GSM4626766 | Normal |
| GSM4626766_AAACCTGTGATGAGG-1   | GSM4626766 | Normal |
| GSM4626766_AAACCTGTGCGACAAG-1  | GSM4626766 | Normal |
| GSM4626766_AAACGGGAGAAGGCCT-1  | GSM4626766 | Normal |
| GSM4626766_AAACGGGAGAATAGGG-1  | GSM4626766 | Normal |
| GSM4626766_AAACGGGAGAGAACAG-1  | GSM4626766 | Normal |
| GSM4626766_AAACGGGAGATACACA-1  | GSM4626766 | Normal |
| GSM4626766_AAACGGGAGATCGGGT-1  | GSM4626766 | Normal |
| GSM4626766_AAACGGGAGGCCCGTT-1  | GSM4626766 | Normal |
| GSM4626766_AAACGGGCACAGACTT-1  | GSM4626766 | Normal |
| GSM4626766_AAACGGGCACAGGAGT-1  | GSM4626766 | Normal |
| GSM4626766_AAACGGGCATCCCACT-1  | GSM4626766 | Normal |
| GSM4626766_AAACGGGGTATATGAG-1  | GSM4626766 | Normal |
| GSM4626766_AAACGGGGTCATACTG-1  | GSM4626766 | Normal |
| GSM4626766_AAACGGGGTCCCTACT-1  | GSM4626766 | Normal |
| GSM4626766_AAACGGGGTTCGTGGCT-1 | GSM4626766 | Normal |
| GSM4626766_AAACGGGGTGTGCGTG-1  | GSM4626766 | Normal |
| GSM4626766_AAACGGGGTTCACCTC-1  | GSM4626766 | Normal |
| GSM4626766_AAACGGGTGCGTAGATC-1 | GSM4626766 | Normal |
| GSM4626766_AAACGGGTCTCTTGAT-1  | GSM4626766 | Normal |
| GSM4626766_AAAGATGCAACCCCG-1   | GSM4626766 | Normal |
| GSM4626766_AAAGATGCAGGAACGT-1  | GSM4626766 | Normal |
| GSM4626766_AAAGATGGTAGCGCAA-1  | GSM4626766 | Normal |
| GSM4626766_AAAGATGGTGAACAG-1   | GSM4626766 | Normal |
| GSM4626766_AAAGATGTCACCTCGT-1  | GSM4626766 | Normal |
| GSM4626766_AAAGATGTCAGTAAA-1   | GSM4626766 | Normal |
| GSM4626766_AAAGATGTCGCGTTTC-1  | GSM4626766 | Normal |
| GSM4626766_AAAGATGTCGGAATCT-1  | GSM4626766 | Normal |
| GSM4626766_AAAGCAAAGAAGATTC-1  | GSM4626766 | Normal |
| GSM4626766_AAAGCAAAGGACAGAA-1  | GSM4626766 | Normal |
| GSM4626766_AAAGCAAAGTAGGCCA-1  | GSM4626766 | Normal |
| GSM4626766_AAAGCAACACAAGTAA-1  | GSM4626766 | Normal |
| GSM4626766_AAAGCAACAGCTGTTA-1  | GSM4626766 | Normal |
| GSM4626766_AAAGCAACAGGGTTAG-1  | GSM4626766 | Normal |
| GSM4626766_AAAGCAACAGTCCTTC-1  | GSM4626766 | Normal |
| GSM4626766_AAAGCAAGTACAGACG-1  | GSM4626766 | Normal |
| GSM4626766_AAAGCAAGTACTTGAC-1  | GSM4626766 | Normal |
| GSM4626766_AAAGCAAGTATTCGTG-1  | GSM4626766 | Normal |

|                               |            |        |
|-------------------------------|------------|--------|
| GSM4626766_AAAGCAAGTGAAAGAG-1 | GSM4626766 | Normal |
| GSM4626766_AAAGCAAGTGGTCCGT-1 | GSM4626766 | Normal |
| GSM4626766_AAAGCAAGTTAAGAAC-1 | GSM4626766 | Normal |
| GSM4626766_AAAGCAAGTTCAACCA-1 | GSM4626766 | Normal |
| GSM4626766_AAAGCAATCCGAAGAG-1 | GSM4626766 | Normal |
| GSM4626766_AAAGCAATCGAATGCT-1 | GSM4626766 | Normal |
| GSM4626766_AAAGTAGAGACTGGGT-1 | GSM4626766 | Normal |
| GSM4626766_AAAGTAGAGCATCATC-1 | GSM4626766 | Normal |
| GSM4626766_AAAGTAGAGGGCTTCC-1 | GSM4626766 | Normal |
| GSM4626766_AAAGTAGAGTAATCCC-1 | GSM4626766 | Normal |
| GSM4626766_AAAGTAGCATGCCGA-1  | GSM4626766 | Normal |
| GSM4626766_AAAGTAGGTACGCACC-1 | GSM4626766 | Normal |
| GSM4626766_AAAGTAGGTAGCACGA-1 | GSM4626766 | Normal |
| GSM4626766_AAAGTAGGTCCTCCAT-1 | GSM4626766 | Normal |
| GSM4626766_AAAGTAGGTCTCCATC-1 | GSM4626766 | Normal |
| GSM4626766_AAAGTAGTCTTAGAGC-1 | GSM4626766 | Normal |
| GSM4626766_AAATGCCAGAGGTAGA-1 | GSM4626766 | Normal |
| GSM4626766_AAATGCCAGCCACCTG-1 | GSM4626766 | Normal |
| GSM4626766_AAATGCCCAAGTCTGT-1 | GSM4626766 | Normal |
| GSM4626766_AAATGCCCAGCGTCCA-1 | GSM4626766 | Normal |
| GSM4626766_AAATGCCGTAAGTGGC-1 | GSM4626766 | Normal |
| GSM4626766_AAATGCCGTATGCTTG-1 | GSM4626766 | Normal |
| GSM4626766_AAATGCCGTTGCGTTA-1 | GSM4626766 | Normal |
| GSM4626766_AAATGCCTCATGCTCC-1 | GSM4626766 | Normal |
| GSM4626766_AAATGCCTCGCTGATA-1 | GSM4626766 | Normal |
| GSM4626766_AACACGTAGACTACAA-1 | GSM4626766 | Normal |
| GSM4626766_AACACGTAGAGTACAT-1 | GSM4626766 | Normal |
| GSM4626766_AACACGTAGCGAGAAA-1 | GSM4626766 | Normal |
| GSM4626766_AACACGTAGCTACCGC-1 | GSM4626766 | Normal |
| GSM4626766_AACACGTAGTACGCC-1  | GSM4626766 | Normal |
| GSM4626766_AACACGTCAACTTGAC-1 | GSM4626766 | Normal |
| GSM4626766_AACACGTCAAGCGAGT-1 | GSM4626766 | Normal |
| GSM4626766_AACACGTCACGAAACG-1 | GSM4626766 | Normal |
| GSM4626766_AACACGTCACGAGGTA-1 | GSM4626766 | Normal |
| GSM4626766_AACACGTGTACCCAAT-1 | GSM4626766 | Normal |
| GSM4626766_AACACGTGTACTTCTT-1 | GSM4626766 | Normal |
| GSM4626766_AACACGTGTCAGAGGT-1 | GSM4626766 | Normal |
| GSM4626766_AACACGTGTCTCTTTA-1 | GSM4626766 | Normal |
| GSM4626766_AACACGTGTTAGCTG-1  | GSM4626766 | Normal |
| GSM4626766_AACACGTTCTGTTTCC-1 | GSM4626766 | Normal |
| GSM4626766_AACACGTTCTCGTATT-1 | GSM4626766 | Normal |
| GSM4626766_AACACGTTCTCTTATG-1 | GSM4626766 | Normal |
| GSM4626766_AACCATGAGCAATCTC-1 | GSM4626766 | Normal |
| GSM4626766_AACCATGAGGTGCTAG-1 | GSM4626766 | Normal |
| GSM4626766_AACCATGCAAGCCGCT-1 | GSM4626766 | Normal |
| GSM4626766_AACCATGCATCGGAAG-1 | GSM4626766 | Normal |
| GSM4626766_AACCATGCATCTGGTA-1 | GSM4626766 | Normal |
| GSM4626766_AACCATGGTACATGTC-1 | GSM4626766 | Normal |
| GSM4626766_AACCATGGTCTCACCT-1 | GSM4626766 | Normal |
| GSM4626766_AACCATGGTTAAGGGC-1 | GSM4626766 | Normal |
| GSM4626766_AACCATGGTTCAGCGC-1 | GSM4626766 | Normal |
| GSM4626766_AACCATGTCAGTTTGG-1 | GSM4626766 | Normal |
| GSM4626766_AACCATGTCATCGATG-1 | GSM4626766 | Normal |
| GSM4626766_AACCATGTCCAGAGGA-1 | GSM4626766 | Normal |
| GSM4626766_AACCATGTCCTTGGTG-1 | GSM4626766 | Normal |
| GSM4626766_AACCGCGAGGACAGCT-1 | GSM4626766 | Normal |
| GSM4626766_AACCGCGAGTTCCACA-1 | GSM4626766 | Normal |

|                                |            |        |
|--------------------------------|------------|--------|
| GSM4626766_AACCGCGCACTGTCGG-1  | GSM4626766 | Normal |
| GSM4626766_AACCGCGGTAAGAGGA-1  | GSM4626766 | Normal |
| GSM4626766_AACCGCGGTATTCGTG-1  | GSM4626766 | Normal |
| GSM4626766_AACCGCGGTCAGTGGA-1  | GSM4626766 | Normal |
| GSM4626766_AACCGCGGTTACGGAG-1  | GSM4626766 | Normal |
| GSM4626766_AACCGCGGTTCTGTGAT-1 | GSM4626766 | Normal |
| GSM4626766_AACCGCGTCAGAGACG-1  | GSM4626766 | Normal |
| GSM4626766_AACCGCGTCCTAAGTG-1  | GSM4626766 | Normal |
| GSM4626766_AACCGCGTCCTAGTGA-1  | GSM4626766 | Normal |
| GSM4626766_AACCGCGTCCTGCAGG-1  | GSM4626766 | Normal |
| GSM4626766_AACCGCGTCGGTTAAC-1  | GSM4626766 | Normal |
| GSM4626766_AACCGCGTCTGAGTGT-1  | GSM4626766 | Normal |
| GSM4626766_AACCGCGTCTGTCAAG-1  | GSM4626766 | Normal |
| GSM4626766_AACGTTGAGCCTCGTG-1  | GSM4626766 | Normal |
| GSM4626766_AACGTTGCACTGTTAG-1  | GSM4626766 | Normal |
| GSM4626766_AACGTTGCAGGAATGC-1  | GSM4626766 | Normal |
| GSM4626766_AACGTTGGTAAGTAGT-1  | GSM4626766 | Normal |
| GSM4626766_AACGTTGGTTCACGG-1   | GSM4626766 | Normal |
| GSM4626766_AACGTTGTCGGTTAAC-1  | GSM4626766 | Normal |
| GSM4626766_AACGTTGTCTACTTAC-1  | GSM4626766 | Normal |
| GSM4626766_AACTCAGAGACGCAAC-1  | GSM4626766 | Normal |
| GSM4626766_AACTCAGAGACGCACA-1  | GSM4626766 | Normal |
| GSM4626766_AACTCAGAGAGGTTAT-1  | GSM4626766 | Normal |
| GSM4626766_AACTCAGAGCTCCCAG-1  | GSM4626766 | Normal |
| GSM4626766_AACTCAGAGGGTATCG-1  | GSM4626766 | Normal |
| GSM4626766_AACTCAGAGTATCGAA-1  | GSM4626766 | Normal |
| GSM4626766_AACTCAGAGTGA CTCT-1 | GSM4626766 | Normal |
| GSM4626766_AACTCAGCAACGATCT-1  | GSM4626766 | Normal |
| GSM4626766_AACTCAGCAATGGAGC-1  | GSM4626766 | Normal |
| GSM4626766_AACTCAGCATGTTCGAT-1 | GSM4626766 | Normal |
| GSM4626766_AACTCAGTCAGCTGGC-1  | GSM4626766 | Normal |
| GSM4626766_AACTCCCAGAAGGTGA-1  | GSM4626766 | Normal |
| GSM4626766_AACTCCCAGGCAGGTT-1  | GSM4626766 | Normal |
| GSM4626766_AACTCCCCAATCAGAA-1  | GSM4626766 | Normal |
| GSM4626766_AACTCCCCAATGGAGC-1  | GSM4626766 | Normal |
| GSM4626766_AACTCCCGTACCAGTT-1  | GSM4626766 | Normal |
| GSM4626766_AACTCCCGTACTTGAC-1  | GSM4626766 | Normal |
| GSM4626766_AACTCCCGTCTAGAGG-1  | GSM4626766 | Normal |
| GSM4626766_AACTCCCGTGCAACTT-1  | GSM4626766 | Normal |
| GSM4626766_AACTCCCTCTCGATGA-1  | GSM4626766 | Normal |
| GSM4626766_AACTCCCTCTGTGCAA-1  | GSM4626766 | Normal |
| GSM4626766_AACTCCCTCTTCCTTC-1  | GSM4626766 | Normal |
| GSM4626766_AACTCCCTCTTTAGGG-1  | GSM4626766 | Normal |
| GSM4626766_AACTCTTAGGTGCACA-1  | GSM4626766 | Normal |
| GSM4626766_AACTCTTACGTCTCT-1   | GSM4626766 | Normal |
| GSM4626766_AACTCTTGTAGCACGA-1  | GSM4626766 | Normal |
| GSM4626766_AACTCTTGTGCATATGC-1 | GSM4626766 | Normal |
| GSM4626766_AACTCTTGTGGTAAA-1   | GSM4626766 | Normal |
| GSM4626766_AACTCTTTCACATGCA-1  | GSM4626766 | Normal |
| GSM4626766_AACTCTTTCAGCATGT-1  | GSM4626766 | Normal |
| GSM4626766_AACTCTTTCCTATTCA-1  | GSM4626766 | Normal |
| GSM4626766_AACTGGTAGACACGAC-1  | GSM4626766 | Normal |
| GSM4626766_AACTGGTAGTAAGTAC-1  | GSM4626766 | Normal |
| GSM4626766_AACTGGTAGTAATCCC-1  | GSM4626766 | Normal |
| GSM4626766_AACTGGTCAGACAGGT-1  | GSM4626766 | Normal |
| GSM4626766_AACTGGTCATCCTTGC-1  | GSM4626766 | Normal |
| GSM4626766_AACTGGTGTCTGATTG-1  | GSM4626766 | Normal |

|                                |            |        |
|--------------------------------|------------|--------|
| GSM4626766_AACTGGTGTGCAACTT-1  | GSM4626766 | Normal |
| GSM4626766_AACTGGTGTGGTGA-1    | GSM4626766 | Normal |
| GSM4626766_AACTGGTTCAATACCG-1  | GSM4626766 | Normal |
| GSM4626766_AACTGGTTCAATTATCC-1 | GSM4626766 | Normal |
| GSM4626766_AACTGGTTCTAACTCT-1  | GSM4626766 | Normal |
| GSM4626766_AACTGGTTCTCTAGGA-1  | GSM4626766 | Normal |
| GSM4626766_AACTTTCAGATCCCGC-1  | GSM4626766 | Normal |
| GSM4626766_AACTTTCAGGACAGCT-1  | GSM4626766 | Normal |
| GSM4626766_AACTTTCAGTATTGGA-1  | GSM4626766 | Normal |
| GSM4626766_AACTTTCCAATACGCT-1  | GSM4626766 | Normal |
| GSM4626766_AACTTTCTGACCAGTT-1  | GSM4626766 | Normal |
| GSM4626766_AACTTTCTCAGATAAG-1  | GSM4626766 | Normal |
| GSM4626766_AACTTTCTCCGCGGTA-1  | GSM4626766 | Normal |
| GSM4626766_AACTTTCTCGCTAGCG-1  | GSM4626766 | Normal |
| GSM4626766_AACTTTCTCTGTGCAA-1  | GSM4626766 | Normal |
| GSM4626766_AAGACCTAGTGGGATC-1  | GSM4626766 | Normal |
| GSM4626766_AAGACCTACTAAGTC-1   | GSM4626766 | Normal |
| GSM4626766_AAGACCTCAGCGTAAG-1  | GSM4626766 | Normal |
| GSM4626766_AAGACCTCATCACAAC-1  | GSM4626766 | Normal |
| GSM4626766_AAGACCTGTAGATTAG-1  | GSM4626766 | Normal |
| GSM4626766_AAGACCTGTCCGCTGA-1  | GSM4626766 | Normal |
| GSM4626766_AAGACCTGTGGCGAAT-1  | GSM4626766 | Normal |
| GSM4626766_AAGACCTTCGGCCGAT-1  | GSM4626766 | Normal |
| GSM4626766_AAGACCTTCTGTTTGT-1  | GSM4626766 | Normal |
| GSM4626766_AAGCCGCAGACCACGA-1  | GSM4626766 | Normal |
| GSM4626766_AAGCCGCAGATGTTAG-1  | GSM4626766 | Normal |
| GSM4626766_AAGCCGCAGATTACCC-1  | GSM4626766 | Normal |
| GSM4626766_AAGCCGCAGCCAGGAT-1  | GSM4626766 | Normal |
| GSM4626766_AAGCCGCAGCGTTTAC-1  | GSM4626766 | Normal |
| GSM4626766_AAGCCGCCAATGGAGC-1  | GSM4626766 | Normal |
| GSM4626766_AAGCCGCCACTGTCGG-1  | GSM4626766 | Normal |
| GSM4626766_AAGCCGCCAGTCAGAG-1  | GSM4626766 | Normal |
| GSM4626766_AAGCCGCCATAGGATA-1  | GSM4626766 | Normal |
| GSM4626766_AAGCCGCCATCCTTGC-1  | GSM4626766 | Normal |
| GSM4626766_AAGCCGCGTATCTGCA-1  | GSM4626766 | Normal |
| GSM4626766_AAGCCGCGTCAGAAGC-1  | GSM4626766 | Normal |
| GSM4626766_AAGCCGCGTCTAACGT-1  | GSM4626766 | Normal |
| GSM4626766_AAGCCGCGTGTGCTG-1   | GSM4626766 | Normal |
| GSM4626766_AAGCCGCTCTGCGTAA-1  | GSM4626766 | Normal |
| GSM4626766_AAGGAGCAGAGAACAG-1  | GSM4626766 | Normal |
| GSM4626766_AAGGAGCAGCTAGGCA-1  | GSM4626766 | Normal |
| GSM4626766_AAGGAGCAGTACGCGA-1  | GSM4626766 | Normal |
| GSM4626766_AAGGAGCAGTCCCACG-1  | GSM4626766 | Normal |
| GSM4626766_AAGGAGCCAATGCCAT-1  | GSM4626766 | Normal |
| GSM4626766_AAGGAGCCAGATGGCA-1  | GSM4626766 | Normal |
| GSM4626766_AAGGAGCCATCCGGGT-1  | GSM4626766 | Normal |
| GSM4626766_AAGGAGCGTAGGAGTC-1  | GSM4626766 | Normal |
| GSM4626766_AAGGAGCGTATATGAG-1  | GSM4626766 | Normal |
| GSM4626766_AAGGAGCGTCCGAAGA-1  | GSM4626766 | Normal |
| GSM4626766_AAGGAGCGTGGTTTCA-1  | GSM4626766 | Normal |
| GSM4626766_AAGGAGCGTTAAAGAC-1  | GSM4626766 | Normal |
| GSM4626766_AAGGAGCGTTTGTGTG-1  | GSM4626766 | Normal |
| GSM4626766_AAGGAGCTCAGAGACG-1  | GSM4626766 | Normal |
| GSM4626766_AAGGAGCTCCGAACGC-1  | GSM4626766 | Normal |
| GSM4626766_AAGGAGCTCGGTGTTA-1  | GSM4626766 | Normal |
| GSM4626766_AAGGAGCTCTGTTGAG-1  | GSM4626766 | Normal |
| GSM4626766_AAGGCAGAGATCCGAG-1  | GSM4626766 | Normal |

|                                 |            |        |
|---------------------------------|------------|--------|
| GSM4626766_AAGGCAGAGGCTCAGA-1   | GSM4626766 | Normal |
| GSM4626766_AAGGCAGCAAAGCAAT-1   | GSM4626766 | Normal |
| GSM4626766_AAGGCAGCATCACGTA-1   | GSM4626766 | Normal |
| GSM4626766_AAGGCAGGTGTGAAAT-1   | GSM4626766 | Normal |
| GSM4626766_AAGGCAGGTTACAGAA-1   | GSM4626766 | Normal |
| GSM4626766_AAGGCAGTCCCACTTG-1   | GSM4626766 | Normal |
| GSM4626766_AAGGCAGTCTCAAGTG-1   | GSM4626766 | Normal |
| GSM4626766_AAGGTTTCAGGCTAGGT-1  | GSM4626766 | Normal |
| GSM4626766_AAGGTTTCAGGGTTCGAT-1 | GSM4626766 | Normal |
| GSM4626766_AAGGTTTCAGGTGGGTT-1  | GSM4626766 | Normal |
| GSM4626766_AAGGTTCCAATGGAGC-1   | GSM4626766 | Normal |
| GSM4626766_AAGGTTCCAGCTCCGA-1   | GSM4626766 | Normal |
| GSM4626766_AAGGTTTCGTACCTACA-1  | GSM4626766 | Normal |
| GSM4626766_AAGGTTTCGTACGCTAT-1  | GSM4626766 | Normal |
| GSM4626766_AAGGTTTCGTCTTGTCC-1  | GSM4626766 | Normal |
| GSM4626766_AAGGTTTCGTGGACGAT-1  | GSM4626766 | Normal |
| GSM4626766_AAGGTTTCGTTCCACTC-1  | GSM4626766 | Normal |
| GSM4626766_AAGGTTTCGTTGCTCCT-1  | GSM4626766 | Normal |
| GSM4626766_AAGGTTCTCCGAGCCA-1   | GSM4626766 | Normal |
| GSM4626766_AAGGTTCTCTTCTGGC-1   | GSM4626766 | Normal |
| GSM4626766_AAGGTTCTCTTGTTTG-1   | GSM4626766 | Normal |
| GSM4626766_AAGTCTGAGAGCAATT-1   | GSM4626766 | Normal |
| GSM4626766_AAGTCTGAGCAAATCA-1   | GSM4626766 | Normal |
| GSM4626766_AAGTCTGAGGACATTA-1   | GSM4626766 | Normal |
| GSM4626766_AAGTCTGAGTACTTGC-1   | GSM4626766 | Normal |
| GSM4626766_AAGTCTGCATTACGAC-1   | GSM4626766 | Normal |
| GSM4626766_AAGTCTGGTAAGTGTA-1   | GSM4626766 | Normal |
| GSM4626766_AAGTCTGGTGTTGAGG-1   | GSM4626766 | Normal |
| GSM4626766_AAGTCTGGTTACCAGT-1   | GSM4626766 | Normal |
| GSM4626766_AAGTCTGTCATCTGTT-1   | GSM4626766 | Normal |
| GSM4626766_AAGTCTGTCATTATCC-1   | GSM4626766 | Normal |
| GSM4626766_AAGTCTGTCCCACTTG-1   | GSM4626766 | Normal |
| GSM4626766_AAGTCTGTCGGCGCTA-1   | GSM4626766 | Normal |
| GSM4626766_AATCCAGAGAAAGTGG-1   | GSM4626766 | Normal |
| GSM4626766_AATCCAGAGATAGTCA-1   | GSM4626766 | Normal |
| GSM4626766_AATCCAGAGGGAAACA-1   | GSM4626766 | Normal |
| GSM4626766_AATCCAGAGTCCCTCT-1   | GSM4626766 | Normal |
| GSM4626766_AATCCAGAGTGCGATG-1   | GSM4626766 | Normal |
| GSM4626766_AATCCAGAGTTCCACA-1   | GSM4626766 | Normal |
| GSM4626766_AATCCAGCAACTGCGC-1   | GSM4626766 | Normal |
| GSM4626766_AATCCAGCAATCGAAA-1   | GSM4626766 | Normal |
| GSM4626766_AATCCAGCACAGATTC-1   | GSM4626766 | Normal |
| GSM4626766_AATCCAGCACGTTTA-1    | GSM4626766 | Normal |
| GSM4626766_AATCCAGGTAGTACCT-1   | GSM4626766 | Normal |
| GSM4626766_AATCCAGGTATAAACG-1   | GSM4626766 | Normal |
| GSM4626766_AATCCAGTCAATAAGG-1   | GSM4626766 | Normal |
| GSM4626766_AATCCAGTCACTCCTG-1   | GSM4626766 | Normal |
| GSM4626766_AATCCAGTCACTTCAT-1   | GSM4626766 | Normal |
| GSM4626766_AATCCAGTCATCACCC-1   | GSM4626766 | Normal |
| GSM4626766_AATCCAGTCCAAGTAC-1   | GSM4626766 | Normal |
| GSM4626766_AATCCAGTCCACTCCA-1   | GSM4626766 | Normal |
| GSM4626766_AATCCAGTCCGCATAA-1   | GSM4626766 | Normal |
| GSM4626766_AATCCAGTCCTTCAAT-1   | GSM4626766 | Normal |
| GSM4626766_AATCCAGTCGGAATCT-1   | GSM4626766 | Normal |
| GSM4626766_AATCCAGTCGGAGCAA-1   | GSM4626766 | Normal |
| GSM4626766_AATCCAGTCTAGCACA-1   | GSM4626766 | Normal |
| GSM4626766_AATCCGGTAGGACTGGT-1  | GSM4626766 | Normal |

|                                |            |        |
|--------------------------------|------------|--------|
| GSM4626766_AATCGGTAGGCGTACA-1  | GSM4626766 | Normal |
| GSM4626766_AATCGGTAGTGTGAA-1   | GSM4626766 | Normal |
| GSM4626766_AATCGGTCACATGGGA-1  | GSM4626766 | Normal |
| GSM4626766_AATCGGTCACTGAAGG-1  | GSM4626766 | Normal |
| GSM4626766_AATCGGTGAGTACT-1    | GSM4626766 | Normal |
| GSM4626766_AATCGGTGTGAGGGAG-1  | GSM4626766 | Normal |
| GSM4626766_AATCGGTGTTACCTC-1   | GSM4626766 | Normal |
| GSM4626766_ACACCAAAGATGCCAG-1  | GSM4626766 | Normal |
| GSM4626766_ACACCAAAGATGCCTT-1  | GSM4626766 | Normal |
| GSM4626766_ACACCAAAGTCTTGCA-1  | GSM4626766 | Normal |
| GSM4626766_ACACCAACAATAGCGG-1  | GSM4626766 | Normal |
| GSM4626766_ACACCAACACGGTGTG-1  | GSM4626766 | Normal |
| GSM4626766_ACACCAACATATGCTG-1  | GSM4626766 | Normal |
| GSM4626766_ACACCAAGTATTAGCC-1  | GSM4626766 | Normal |
| GSM4626766_ACACCAAGTCTAGCGC-1  | GSM4626766 | Normal |
| GSM4626766_ACACCAAGTGGTCCGT-1  | GSM4626766 | Normal |
| GSM4626766_ACACCAATCGCCTGTT-1  | GSM4626766 | Normal |
| GSM4626766_ACACCAATCGGTGTGCG-1 | GSM4626766 | Normal |
| GSM4626766_ACACCAATCGTAGGTT-1  | GSM4626766 | Normal |
| GSM4626766_ACACCCTAGATGTGTA-1  | GSM4626766 | Normal |
| GSM4626766_ACACCCTAGCGCCTTG-1  | GSM4626766 | Normal |
| GSM4626766_ACACCCTAGTGGGCTA-1  | GSM4626766 | Normal |
| GSM4626766_ACACCCTCAACACGCC-1  | GSM4626766 | Normal |
| GSM4626766_ACACCCTCAGGGAGAG-1  | GSM4626766 | Normal |
| GSM4626766_ACACCCTGTAACGACG-1  | GSM4626766 | Normal |
| GSM4626766_ACACCCTGTAAGGATT-1  | GSM4626766 | Normal |
| GSM4626766_ACACCCTGTCAAGCGA-1  | GSM4626766 | Normal |
| GSM4626766_ACACCCTGTCTCCAT-1   | GSM4626766 | Normal |
| GSM4626766_ACACCCTTCCAAGAT-1   | GSM4626766 | Normal |
| GSM4626766_ACACCCTTCGTACCGG-1  | GSM4626766 | Normal |
| GSM4626766_ACACCCTTCTTCGAGA-1  | GSM4626766 | Normal |
| GSM4626766_ACACCGGAGACAGGCT-1  | GSM4626766 | Normal |
| GSM4626766_ACACCGGAGGTGACCA-1  | GSM4626766 | Normal |
| GSM4626766_ACACCGGAGTCTCGGC-1  | GSM4626766 | Normal |
| GSM4626766_ACACCGGCACAACGCC-1  | GSM4626766 | Normal |
| GSM4626766_ACACCGGCATACTCTT-1  | GSM4626766 | Normal |
| GSM4626766_ACACCGGCATAGTAAG-1  | GSM4626766 | Normal |
| GSM4626766_ACACCGGCATGCAACT-1  | GSM4626766 | Normal |
| GSM4626766_ACACCGGCATTTGCC-1   | GSM4626766 | Normal |
| GSM4626766_ACACCGGGTAAATGTG-1  | GSM4626766 | Normal |
| GSM4626766_ACACCGGGTGCCTTGG-1  | GSM4626766 | Normal |
| GSM4626766_ACACCGGGTTCACAA-1   | GSM4626766 | Normal |
| GSM4626766_ACACCGGGTGTGGCC-1   | GSM4626766 | Normal |
| GSM4626766_ACACCGGTCAGCTGGC-1  | GSM4626766 | Normal |
| GSM4626766_ACACCGGTCCGGGTGT-1  | GSM4626766 | Normal |
| GSM4626766_ACACCGGTCTAAGCCA-1  | GSM4626766 | Normal |
| GSM4626766_ACACTGAAGAGTCTGG-1  | GSM4626766 | Normal |
| GSM4626766_ACACTGAAGTGATCGG-1  | GSM4626766 | Normal |
| GSM4626766_ACACTGAAGTGGAGAA-1  | GSM4626766 | Normal |
| GSM4626766_ACACTGACAAGGACTG-1  | GSM4626766 | Normal |
| GSM4626766_ACACTGAGTGCACGAA-1  | GSM4626766 | Normal |
| GSM4626766_ACACTGATCCCTAACC-1  | GSM4626766 | Normal |
| GSM4626766_ACAGCCGAGACGCTTT-1  | GSM4626766 | Normal |
| GSM4626766_ACAGCCGAGATGCCTT-1  | GSM4626766 | Normal |
| GSM4626766_ACAGCCGAGATGGCA-1   | GSM4626766 | Normal |
| GSM4626766_ACAGCCGCATGAGCGA-1  | GSM4626766 | Normal |
| GSM4626766_ACAGCCGGTTACGCGC-1  | GSM4626766 | Normal |

|                                 |            |        |
|---------------------------------|------------|--------|
| GSM4626766_ACAGCCGGTTCCTCACTC-1 | GSM4626766 | Normal |
| GSM4626766_ACAGCCGGTTCCTCATT-1  | GSM4626766 | Normal |
| GSM4626766_ACAGCCGTCACGGTTA-1   | GSM4626766 | Normal |
| GSM4626766_ACAGCCGTCCTGCTTG-1   | GSM4626766 | Normal |
| GSM4626766_ACAGCCGTCCTTCAAT-1   | GSM4626766 | Normal |
| GSM4626766_ACAGCTAAGGTGTTAA-1   | GSM4626766 | Normal |
| GSM4626766_ACAGCTACAGATCTGT-1   | GSM4626766 | Normal |
| GSM4626766_ACAGCTACATACGCCG-1   | GSM4626766 | Normal |
| GSM4626766_ACAGCTACATGAGCGA-1   | GSM4626766 | Normal |
| GSM4626766_ACAGCTAGTACATGTC-1   | GSM4626766 | Normal |
| GSM4626766_ACAGCTATCACAGTAC-1   | GSM4626766 | Normal |
| GSM4626766_ACAGCTATCTAACGGT-1   | GSM4626766 | Normal |
| GSM4626766_ACATACGAGAGGTTAT-1   | GSM4626766 | Normal |
| GSM4626766_ACATACGAGCGATCCC-1   | GSM4626766 | Normal |
| GSM4626766_ACATACGAGCTCCTTC-1   | GSM4626766 | Normal |
| GSM4626766_ACATACGAGTGGAGTC-1   | GSM4626766 | Normal |
| GSM4626766_ACATACGCACAGCCCA-1   | GSM4626766 | Normal |
| GSM4626766_ACATACGCACATCCGG-1   | GSM4626766 | Normal |
| GSM4626766_ACATACGCATGCAACT-1   | GSM4626766 | Normal |
| GSM4626766_ACATACGGTAGCGATG-1   | GSM4626766 | Normal |
| GSM4626766_ACATACGGTAGCGTGA-1   | GSM4626766 | Normal |
| GSM4626766_ACATACGGTCTCCCTA-1   | GSM4626766 | Normal |
| GSM4626766_ACATACGGTGGTACAG-1   | GSM4626766 | Normal |
| GSM4626766_ACATACGTCAAAGACA-1   | GSM4626766 | Normal |
| GSM4626766_ACATCAGAGAAACCGC-1   | GSM4626766 | Normal |
| GSM4626766_ACATCAGAGATGTCGG-1   | GSM4626766 | Normal |
| GSM4626766_ACATCAGCAGATCCAT-1   | GSM4626766 | Normal |
| GSM4626766_ACATCAGCATGTTCCC-1   | GSM4626766 | Normal |
| GSM4626766_ACATCAGGTAACGTTC-1   | GSM4626766 | Normal |
| GSM4626766_ACATCAGGTAGCGATG-1   | GSM4626766 | Normal |
| GSM4626766_ACATCAGGTGCAACTT-1   | GSM4626766 | Normal |
| GSM4626766_ACATCAGGTGGCTCCA-1   | GSM4626766 | Normal |
| GSM4626766_ACATCAGGTTCAGCGC-1   | GSM4626766 | Normal |
| GSM4626766_ACATGGTAGCGATTCT-1   | GSM4626766 | Normal |
| GSM4626766_ACATGGTCACTGTCGG-1   | GSM4626766 | Normal |
| GSM4626766_ACATGGTGTACCGGCT-1   | GSM4626766 | Normal |
| GSM4626766_ACATGGTGTGTCATGCCG-1 | GSM4626766 | Normal |
| GSM4626766_ACATGGTGTGCGAACAG-1  | GSM4626766 | Normal |
| GSM4626766_ACATGGTGTGAGTATA-1   | GSM4626766 | Normal |
| GSM4626766_ACATGGTGTGCCCTTGG-1  | GSM4626766 | Normal |
| GSM4626766_ACATGGTTCAAAGTAG-1   | GSM4626766 | Normal |
| GSM4626766_ACATGGTTCGCGATCT-1   | GSM4626766 | Normal |
| GSM4626766_ACCAGTAAGAAGGCCT-1   | GSM4626766 | Normal |
| GSM4626766_ACCAGTAAGAATGTGT-1   | GSM4626766 | Normal |
| GSM4626766_ACCAGTAAGAATTGTG-1   | GSM4626766 | Normal |
| GSM4626766_ACCAGTAAGCGATCCC-1   | GSM4626766 | Normal |
| GSM4626766_ACCAGTAAGCGTCAAG-1   | GSM4626766 | Normal |
| GSM4626766_ACCAGTACAACCTTGAC-1  | GSM4626766 | Normal |
| GSM4626766_ACCAGTACAATAAGCA-1   | GSM4626766 | Normal |
| GSM4626766_ACCAGTACAGCCTTGG-1   | GSM4626766 | Normal |
| GSM4626766_ACCAGTACAGGACGTA-1   | GSM4626766 | Normal |
| GSM4626766_ACCAGTAGTAAGTTCC-1   | GSM4626766 | Normal |
| GSM4626766_ACCAGTAGTATTCGTG-1   | GSM4626766 | Normal |
| GSM4626766_ACCAGTAGTCGCGAAA-1   | GSM4626766 | Normal |
| GSM4626766_ACCAGTAGTGTGAAAT-1   | GSM4626766 | Normal |
| GSM4626766_ACCAGTATCATCGGAT-1   | GSM4626766 | Normal |
| GSM4626766_ACCAGTATCATGTAGC-1   | GSM4626766 | Normal |

|                               |            |        |
|-------------------------------|------------|--------|
| GSM4626766_ACCAGTATCGAGAACG-1 | GSM4626766 | Normal |
| GSM4626766_ACCCACTAGACAGACC-1 | GSM4626766 | Normal |
| GSM4626766_ACCCACTAGATATGCA-1 | GSM4626766 | Normal |
| GSM4626766_ACCCACTAGCATCATC-1 | GSM4626766 | Normal |
| GSM4626766_ACCCACTAGCCGATTT-1 | GSM4626766 | Normal |
| GSM4626766_ACCCACTAGCCGGTAA-1 | GSM4626766 | Normal |
| GSM4626766_ACCCACTAGGAGTACC-1 | GSM4626766 | Normal |
| GSM4626766_ACCCACTAGGATGCGT-1 | GSM4626766 | Normal |
| GSM4626766_ACCCACTAGGCGCTCT-1 | GSM4626766 | Normal |
| GSM4626766_ACCCACTAGTATCGAA-1 | GSM4626766 | Normal |
| GSM4626766_ACCCACTAGTGCCAGA-1 | GSM4626766 | Normal |
| GSM4626766_ACCCACTCAAAGCAAT-1 | GSM4626766 | Normal |
| GSM4626766_ACCCACTCACAACGCC-1 | GSM4626766 | Normal |
| GSM4626766_ACCCACTCACATCCGG-1 | GSM4626766 | Normal |
| GSM4626766_ACCCACTCACCTTGTC-1 | GSM4626766 | Normal |
| GSM4626766_ACCCACTCATACGCCG-1 | GSM4626766 | Normal |
| GSM4626766_ACCCACTCATGTAGTC-1 | GSM4626766 | Normal |
| GSM4626766_ACCCACTGTAATCACC-1 | GSM4626766 | Normal |
| GSM4626766_ACCCACTGTCTTGCGG-1 | GSM4626766 | Normal |
| GSM4626766_ACCCACTTCACCTCGT-1 | GSM4626766 | Normal |
| GSM4626766_ACCCACTTCAGCCTAA-1 | GSM4626766 | Normal |
| GSM4626766_ACCCACTTCCTTGCTC-1 | GSM4626766 | Normal |
| GSM4626766_ACCCACTTCGGGAGTA-1 | GSM4626766 | Normal |
| GSM4626766_ACCGTAAGAATGTGT-1  | GSM4626766 | Normal |
| GSM4626766_ACCGTAAGACTAGGC-1  | GSM4626766 | Normal |
| GSM4626766_ACCGTAACACCCATGG-1 | GSM4626766 | Normal |
| GSM4626766_ACCGTAAGTGTGACCC-1 | GSM4626766 | Normal |
| GSM4626766_ACCGTAATCGATGAGG-1 | GSM4626766 | Normal |
| GSM4626766_ACCTTTAAGCCAGGAT-1 | GSM4626766 | Normal |
| GSM4626766_ACCTTTAAGGAGTAGA-1 | GSM4626766 | Normal |
| GSM4626766_ACCTTTAAGTGCCACA-1 | GSM4626766 | Normal |
| GSM4626766_ACCTTTACAGCATACT-1 | GSM4626766 | Normal |
| GSM4626766_ACCTTTACAGTTCATG-1 | GSM4626766 | Normal |
| GSM4626766_ACCTTTACATTAGCCA-1 | GSM4626766 | Normal |
| GSM4626766_ACCTTTAGTGATGCC-1  | GSM4626766 | Normal |
| GSM4626766_ACCTTTAGTGGGTATG-1 | GSM4626766 | Normal |
| GSM4626766_ACCTTTAGTGTGCCTG-1 | GSM4626766 | Normal |
| GSM4626766_ACCTTTATCACAACGT-1 | GSM4626766 | Normal |
| GSM4626766_ACCTTTATCCCAAGAT-1 | GSM4626766 | Normal |
| GSM4626766_ACCTTTATCCGAACGC-1 | GSM4626766 | Normal |
| GSM4626766_ACGAGCCAGACACTAA-1 | GSM4626766 | Normal |
| GSM4626766_ACGAGCCAGCCCAATT-1 | GSM4626766 | Normal |
| GSM4626766_ACGAGCCAGGCAGTCA-1 | GSM4626766 | Normal |
| GSM4626766_ACGAGCCAGTTGCAGG-1 | GSM4626766 | Normal |
| GSM4626766_ACGAGCCACCCGAATT-1 | GSM4626766 | Normal |
| GSM4626766_ACGAGCCGTATAGTAG-1 | GSM4626766 | Normal |
| GSM4626766_ACGAGCCGTATGAAAC-1 | GSM4626766 | Normal |
| GSM4626766_ACGAGCCGTATGATAT-1 | GSM4626766 | Normal |
| GSM4626766_ACGAGCCGTTCCAACA-1 | GSM4626766 | Normal |
| GSM4626766_ACGAGCCTCGGTGTTA-1 | GSM4626766 | Normal |
| GSM4626766_ACGAGGAAGTAAGTAC-1 | GSM4626766 | Normal |
| GSM4626766_ACGAGGACAACGCGC-1  | GSM4626766 | Normal |
| GSM4626766_ACGAGGACAATCCAAC-1 | GSM4626766 | Normal |
| GSM4626766_ACGAGGACAATCGGTT-1 | GSM4626766 | Normal |
| GSM4626766_ACGAGGACACAAGACG-1 | GSM4626766 | Normal |
| GSM4626766_ACGAGGACAGGGTTAG-1 | GSM4626766 | Normal |
| GSM4626766_ACGAGGACAGTAGAGC-1 | GSM4626766 | Normal |



|                                |            |        |
|--------------------------------|------------|--------|
| GSM4626766_ACGAGGACATCACGTA-1  | GSM4626766 | Normal |
| GSM4626766_ACGAGGAGTACGACCC-1  | GSM4626766 | Normal |
| GSM4626766_ACGAGGAGTAGCGCTC-1  | GSM4626766 | Normal |
| GSM4626766_ACGAGGAGTCCATGAT-1  | GSM4626766 | Normal |
| GSM4626766_ACGAGGAGTTCTCATT-1  | GSM4626766 | Normal |
| GSM4626766_ACGAGGAGTTTGACAC-1  | GSM4626766 | Normal |
| GSM4626766_ACGAGGATCTACCTGC-1  | GSM4626766 | Normal |
| GSM4626766_ACGATACAGAAGAAGC-1  | GSM4626766 | Normal |
| GSM4626766_ACGATACAGCCACTAT-1  | GSM4626766 | Normal |
| GSM4626766_ACGATACAGCTAGTGG-1  | GSM4626766 | Normal |
| GSM4626766_ACGATACAGCTGAAAT-1  | GSM4626766 | Normal |
| GSM4626766_ACGATACAGGAATTAC-1  | GSM4626766 | Normal |
| GSM4626766_ACGATACCACCTCGGA-1  | GSM4626766 | Normal |
| GSM4626766_ACGATACCAGACAGGT-1  | GSM4626766 | Normal |
| GSM4626766_ACGATACCAGCGATCC-1  | GSM4626766 | Normal |
| GSM4626766_ACGATACGTATGGTTC-1  | GSM4626766 | Normal |
| GSM4626766_ACGATACGTCAAAGAT-1  | GSM4626766 | Normal |
| GSM4626766_ACGATACGTGCTTCT-1   | GSM4626766 | Normal |
| GSM4626766_ACGATACGTGAGCGAT-1  | GSM4626766 | Normal |
| GSM4626766_ACGATACGTTGCGTTA-1  | GSM4626766 | Normal |
| GSM4626766_ACGATACGTTTGCATG-1  | GSM4626766 | Normal |
| GSM4626766_ACGATACTCATAACCG-1  | GSM4626766 | Normal |
| GSM4626766_ACGATACTCTCCTATA-1  | GSM4626766 | Normal |
| GSM4626766_ACGATGTAGAAGAAGC-1  | GSM4626766 | Normal |
| GSM4626766_ACGATGTAGTCACGCC-1  | GSM4626766 | Normal |
| GSM4626766_ACGATGTGTAGCGTCC-1  | GSM4626766 | Normal |
| GSM4626766_ACGATGTGTCCAGTTA-1  | GSM4626766 | Normal |
| GSM4626766_ACGATGTGTTCTGAAC-1  | GSM4626766 | Normal |
| GSM4626766_ACGATGTTCCAGCACAT-1 | GSM4626766 | Normal |
| GSM4626766_ACGATGTTCCACGTGG-1  | GSM4626766 | Normal |
| GSM4626766_ACGATGTTCGAACGGA-1  | GSM4626766 | Normal |
| GSM4626766_ACGCAGCAGAGCTTCT-1  | GSM4626766 | Normal |
| GSM4626766_ACGCAGCAGTCATCCA-1  | GSM4626766 | Normal |
| GSM4626766_ACGCAGCCAATGTTGC-1  | GSM4626766 | Normal |
| GSM4626766_ACGCAGCCACGGCTAC-1  | GSM4626766 | Normal |
| GSM4626766_ACGCAGCCAGCGTTCG-1  | GSM4626766 | Normal |
| GSM4626766_ACGCAGCCATCTCCCA-1  | GSM4626766 | Normal |
| GSM4626766_ACGCAGCGTCGACTAT-1  | GSM4626766 | Normal |
| GSM4626766_ACGCAGCGTGGCCCTA-1  | GSM4626766 | Normal |
| GSM4626766_ACGCAGCGTGGTACAG-1  | GSM4626766 | Normal |
| GSM4626766_ACGCAGCGTTCACCTC-1  | GSM4626766 | Normal |
| GSM4626766_ACGCAGCTCAAACGGG-1  | GSM4626766 | Normal |
| GSM4626766_ACGCAGCTCAGCAACT-1  | GSM4626766 | Normal |
| GSM4626766_ACGCAGCTCCACGACG-1  | GSM4626766 | Normal |
| GSM4626766_ACGCAGCTCCGATATG-1  | GSM4626766 | Normal |
| GSM4626766_ACGCAGCTCCGTCATC-1  | GSM4626766 | Normal |
| GSM4626766_ACGCAGCTCGCGTAGC-1  | GSM4626766 | Normal |
| GSM4626766_ACGCCAGAGAAAGTGG-1  | GSM4626766 | Normal |
| GSM4626766_ACGCCAGCACACTGCG-1  | GSM4626766 | Normal |
| GSM4626766_ACGCCAGCATCATCCC-1  | GSM4626766 | Normal |
| GSM4626766_ACGCCAGCATCCTTGC-1  | GSM4626766 | Normal |
| GSM4626766_ACGCCAGCATCGGGTC-1  | GSM4626766 | Normal |
| GSM4626766_ACGCCAGGTAGTGAAT-1  | GSM4626766 | Normal |
| GSM4626766_ACGCCAGGTATAATGG-1  | GSM4626766 | Normal |
| GSM4626766_ACGCCAGTCCTAGAAC-1  | GSM4626766 | Normal |
| GSM4626766_ACGCCGAAGTTAACGA-1  | GSM4626766 | Normal |
| GSM4626766_ACGCCGACAAGGTTTC-1  | GSM4626766 | Normal |

|                               |            |        |
|-------------------------------|------------|--------|
| GSM4626766_ACGCCGACAATGACCT-1 | GSM4626766 | Normal |
| GSM4626766_ACGCCGACAGGATTGG-1 | GSM4626766 | Normal |
| GSM4626766_ACGCCGACATAGAAAC-1 | GSM4626766 | Normal |
| GSM4626766_ACGCCGACATTACGAC-1 | GSM4626766 | Normal |
| GSM4626766_ACGCCGAGTCATACTG-1 | GSM4626766 | Normal |
| GSM4626766_ACGCCGAGTGGAAGA-1  | GSM4626766 | Normal |
| GSM4626766_ACGCCGAGTTCCATGA-1 | GSM4626766 | Normal |
| GSM4626766_ACGCCGATCAGGCGAA-1 | GSM4626766 | Normal |
| GSM4626766_ACGCCGATCCGGCACA-1 | GSM4626766 | Normal |
| GSM4626766_ACGCCGATCGCAGGCT-1 | GSM4626766 | Normal |
| GSM4626766_ACGGAGAAGACTGGGT-1 | GSM4626766 | Normal |
| GSM4626766_ACGGAGAAGCAGGCTA-1 | GSM4626766 | Normal |
| GSM4626766_ACGGAGAAGCTAGTGG-1 | GSM4626766 | Normal |
| GSM4626766_ACGGAGAAGGCTACGA-1 | GSM4626766 | Normal |
| GSM4626766_ACGGAGAAGTGTACGG-1 | GSM4626766 | Normal |
| GSM4626766_ACGGAGACACCGGAAA-1 | GSM4626766 | Normal |
| GSM4626766_ACGGAGACATGGTCTA-1 | GSM4626766 | Normal |
| GSM4626766_ACGGAGAGTTCAGTAC-1 | GSM4626766 | Normal |
| GSM4626766_ACGGAGATCAGTGTTG-1 | GSM4626766 | Normal |
| GSM4626766_ACGGAGATCATAGCAC-1 | GSM4626766 | Normal |
| GSM4626766_ACGGAGATCCACTCCA-1 | GSM4626766 | Normal |
| GSM4626766_ACGGAGATCCGATATG-1 | GSM4626766 | Normal |
| GSM4626766_ACGGAGATCGACGGAA-1 | GSM4626766 | Normal |
| GSM4626766_ACGGAGATCGGTCCGA-1 | GSM4626766 | Normal |
| GSM4626766_ACGGAGATCTCCGGTT-1 | GSM4626766 | Normal |
| GSM4626766_ACGGAGATCTGCTTGC-1 | GSM4626766 | Normal |
| GSM4626766_ACGGAGATCTGTCTCG-1 | GSM4626766 | Normal |
| GSM4626766_ACGGCCAAGATGTGTA-1 | GSM4626766 | Normal |
| GSM4626766_ACGGCCAAGGTGCTTT-1 | GSM4626766 | Normal |
| GSM4626766_ACGGCCAAGTACTTGC-1 | GSM4626766 | Normal |
| GSM4626766_ACGGCCACAATGTAAG-1 | GSM4626766 | Normal |
| GSM4626766_ACGGCCACACCTCGGA-1 | GSM4626766 | Normal |
| GSM4626766_ACGGCCACACGCATCG-1 | GSM4626766 | Normal |
| GSM4626766_ACGGCCACATGTAAGA-1 | GSM4626766 | Normal |
| GSM4626766_ACGGCCAGTAGCGTAG-1 | GSM4626766 | Normal |
| GSM4626766_ACGGCCAGTAGCTGCC-1 | GSM4626766 | Normal |
| GSM4626766_ACGGCCAGTATATCCG-1 | GSM4626766 | Normal |
| GSM4626766_ACGGCCAGTCACTTCC-1 | GSM4626766 | Normal |
| GSM4626766_ACGGCCAGTCCAACTA-1 | GSM4626766 | Normal |
| GSM4626766_ACGGCCAGTGAACCTT-1 | GSM4626766 | Normal |
| GSM4626766_ACGGCCAGTTACGTCA-1 | GSM4626766 | Normal |
| GSM4626766_ACGGCCAGTTCAGGCC-1 | GSM4626766 | Normal |
| GSM4626766_ACGGCCAGTTGCGCAC-1 | GSM4626766 | Normal |
| GSM4626766_ACGGCCATCAGTGTTG-1 | GSM4626766 | Normal |
| GSM4626766_ACGGCCATCCTCGCAT-1 | GSM4626766 | Normal |
| GSM4626766_ACGGCCATCGGAAACG-1 | GSM4626766 | Normal |
| GSM4626766_ACGGCCATCGTCGTTT-1 | GSM4626766 | Normal |
| GSM4626766_ACGGCCATCTCTAGGA-1 | GSM4626766 | Normal |
| GSM4626766_ACGGCCATCTGTTGAG-1 | GSM4626766 | Normal |
| GSM4626766_ACGGGCTAGAACTCGG-1 | GSM4626766 | Normal |
| GSM4626766_ACGGGCTAGGAACTGC-1 | GSM4626766 | Normal |
| GSM4626766_ACGGGCTAGGAGTTTA-1 | GSM4626766 | Normal |
| GSM4626766_ACGGGCTAGTTCGCAT-1 | GSM4626766 | Normal |
| GSM4626766_ACGGGCTCAGATCGGA-1 | GSM4626766 | Normal |
| GSM4626766_ACGGGCTGTACTTCTT-1 | GSM4626766 | Normal |
| GSM4626766_ACGGGCTTCCACGACG-1 | GSM4626766 | Normal |
| GSM4626766_ACGGGCTTCGGGAGTA-1 | GSM4626766 | Normal |

|                               |            |        |
|-------------------------------|------------|--------|
| GSM4626766_ACGGGCTTCTTGACGA-1 | GSM4626766 | Normal |
| GSM4626766_ACGGGTCCAAAGTGCG-1 | GSM4626766 | Normal |
| GSM4626766_ACGGGTCCAAATTGCC-1 | GSM4626766 | Normal |
| GSM4626766_ACGGGTCCAGATCTGT-1 | GSM4626766 | Normal |
| GSM4626766_ACGGGTCCAGTAAGAT-1 | GSM4626766 | Normal |
| GSM4626766_ACGGGTCGTAGCCTAT-1 | GSM4626766 | Normal |
| GSM4626766_ACGGGTCGTGAAGGCT-1 | GSM4626766 | Normal |
| GSM4626766_ACGGGTCGTTGTCGCG-1 | GSM4626766 | Normal |
| GSM4626766_ACGGGTCTCCCTCTTT-1 | GSM4626766 | Normal |
| GSM4626766_ACGTCAAAGACAGAGA-1 | GSM4626766 | Normal |
| GSM4626766_ACGTCAAAGGATGGTC-1 | GSM4626766 | Normal |
| GSM4626766_ACGTCAAAGTACGATA-1 | GSM4626766 | Normal |
| GSM4626766_ACGTCAAAGTGGTAGC-1 | GSM4626766 | Normal |
| GSM4626766_ACGTCAACAAAGGTGC-1 | GSM4626766 | Normal |
| GSM4626766_ACGTCAACACAGACTT-1 | GSM4626766 | Normal |
| GSM4626766_ACGTCAACAGAGCCAA-1 | GSM4626766 | Normal |
| GSM4626766_ACGTCAACAGCATACT-1 | GSM4626766 | Normal |
| GSM4626766_ACGTCAACAGCTGCTG-1 | GSM4626766 | Normal |
| GSM4626766_ACGTCAAGTACTTCTT-1 | GSM4626766 | Normal |
| GSM4626766_ACGTCAAGTATATGGA-1 | GSM4626766 | Normal |
| GSM4626766_ACGTCAAGTACTACT-1  | GSM4626766 | Normal |
| GSM4626766_ACTATCTAGACCGGAT-1 | GSM4626766 | Normal |
| GSM4626766_ACTATCTAGGCTAGAC-1 | GSM4626766 | Normal |
| GSM4626766_ACTATCTAGTTAGCGG-1 | GSM4626766 | Normal |
| GSM4626766_ACTATCTAGTTGTAGA-1 | GSM4626766 | Normal |
| GSM4626766_ACTATCTCAAACCCAT-1 | GSM4626766 | Normal |
| GSM4626766_ACTATCTCAGCCTATA-1 | GSM4626766 | Normal |
| GSM4626766_ACTATCTCAGCGAACA-1 | GSM4626766 | Normal |
| GSM4626766_ACTATCTGTAAATACG-1 | GSM4626766 | Normal |
| GSM4626766_ACTATCTGTACGCTGC-1 | GSM4626766 | Normal |
| GSM4626766_ACTATCTGTACTCAAC-1 | GSM4626766 | Normal |
| GSM4626766_ACTATCTGTATATGGA-1 | GSM4626766 | Normal |
| GSM4626766_ACTATCTTCCTTTCTC-1 | GSM4626766 | Normal |
| GSM4626766_ACTATCTTCTGATACG-1 | GSM4626766 | Normal |
| GSM4626766_ACTGAACAGCAGCGTA-1 | GSM4626766 | Normal |
| GSM4626766_ACTGAACAGCTGATAA-1 | GSM4626766 | Normal |
| GSM4626766_ACTGAACAGTCTTGCA-1 | GSM4626766 | Normal |
| GSM4626766_ACTGAACAGTGGTCCC-1 | GSM4626766 | Normal |
| GSM4626766_ACTGAACCAGGGATTG-1 | GSM4626766 | Normal |
| GSM4626766_ACTGAACCATATACCG-1 | GSM4626766 | Normal |
| GSM4626766_ACTGAACGTATGAAAC-1 | GSM4626766 | Normal |
| GSM4626766_ACTGAACTCCGCACA-1  | GSM4626766 | Normal |
| GSM4626766_ACTGAACTCCTATGTT-1 | GSM4626766 | Normal |
| GSM4626766_ACTGAGTAGATGTTAG-1 | GSM4626766 | Normal |
| GSM4626766_ACTGAGTAGCGATGAC-1 | GSM4626766 | Normal |
| GSM4626766_ACTGAGTAGGAGTACC-1 | GSM4626766 | Normal |
| GSM4626766_ACTGAGTCAACACCCG-1 | GSM4626766 | Normal |
| GSM4626766_ACTGAGTCAAGGCTCC-1 | GSM4626766 | Normal |
| GSM4626766_ACTGAGTCAAGTAATG-1 | GSM4626766 | Normal |
| GSM4626766_ACTGAGTCACTGTGTA-1 | GSM4626766 | Normal |
| GSM4626766_ACTGAGTGTAATTGGA-1 | GSM4626766 | Normal |
| GSM4626766_ACTGAGTGACAGACG-1  | GSM4626766 | Normal |
| GSM4626766_ACTGAGTGTCGGCATC-1 | GSM4626766 | Normal |
| GSM4626766_ACTGAGTGTGACGGTA-1 | GSM4626766 | Normal |
| GSM4626766_ACTGAGTGTGCAACTT-1 | GSM4626766 | Normal |
| GSM4626766_ACTGAGTGTCTGTTT-1  | GSM4626766 | Normal |
| GSM4626766_ACTGAGTTCAAGAAGT-1 | GSM4626766 | Normal |

|                                 |            |        |
|---------------------------------|------------|--------|
| GSM4626766_ACTGAGTTCACGCGGT-1   | GSM4626766 | Normal |
| GSM4626766_ACTGAGTTCAGTTGAC-1   | GSM4626766 | Normal |
| GSM4626766_ACTGAGTTCATGCAAC-1   | GSM4626766 | Normal |
| GSM4626766_ACTGAGTTCCTACTGGG-1  | GSM4626766 | Normal |
| GSM4626766_ACTGAGTTCTAACCGA-1   | GSM4626766 | Normal |
| GSM4626766_ACTGATGAGACTACAA-1   | GSM4626766 | Normal |
| GSM4626766_ACTGATGAGGAATGGA-1   | GSM4626766 | Normal |
| GSM4626766_ACTGATGAGGAGTTGC-1   | GSM4626766 | Normal |
| GSM4626766_ACTGATGGTCCCTACT-1   | GSM4626766 | Normal |
| GSM4626766_ACTGATGGTCCGATCG-1   | GSM4626766 | Normal |
| GSM4626766_ACTGATGGTGACAAAT-1   | GSM4626766 | Normal |
| GSM4626766_ACTGATGGTGTAAGTA-1   | GSM4626766 | Normal |
| GSM4626766_ACTGATGGTTAGTGGG-1   | GSM4626766 | Normal |
| GSM4626766_ACTGATGTCGGAGCAA-1   | GSM4626766 | Normal |
| GSM4626766_ACTGCTCAGAGCTGGT-1   | GSM4626766 | Normal |
| GSM4626766_ACTGCTCAGATCCGAG-1   | GSM4626766 | Normal |
| GSM4626766_ACTGCTCAGCTGCCCA-1   | GSM4626766 | Normal |
| GSM4626766_ACTGCTCAGGTGACCA-1   | GSM4626766 | Normal |
| GSM4626766_ACTGCTCAGTTGTAGA-1   | GSM4626766 | Normal |
| GSM4626766_ACTGCTCCATTCTCAT-1   | GSM4626766 | Normal |
| GSM4626766_ACTGCTCGTACAGTTC-1   | GSM4626766 | Normal |
| GSM4626766_ACTGCTCGTGTAATGA-1   | GSM4626766 | Normal |
| GSM4626766_ACTGCTCTCCATGAGT-1   | GSM4626766 | Normal |
| GSM4626766_ACTGCTCTCGGTGTCG-1   | GSM4626766 | Normal |
| GSM4626766_ACTGCTCTCGTCTGAA-1   | GSM4626766 | Normal |
| GSM4626766_ACTGCTCTCTATCCTA-1   | GSM4626766 | Normal |
| GSM4626766_ACTGCTCTCTGAGTGT-1   | GSM4626766 | Normal |
| GSM4626766_ACTGCTCTCTGCCCTA-1   | GSM4626766 | Normal |
| GSM4626766_ACTGCTCTCTGTGCT-1    | GSM4626766 | Normal |
| GSM4626766_ACTGTCCAGGCTAGGT-1   | GSM4626766 | Normal |
| GSM4626766_ACTGTCCAGTGCCAGA-1   | GSM4626766 | Normal |
| GSM4626766_ACTGTCCCAACTGCGC-1   | GSM4626766 | Normal |
| GSM4626766_ACTGTCCACATGTGT-1    | GSM4626766 | Normal |
| GSM4626766_ACTGTCCACGGCGTT-1    | GSM4626766 | Normal |
| GSM4626766_ACTGTCCAGTAAGCG-1    | GSM4626766 | Normal |
| GSM4626766_ACTGTCCAGTCGATT-1    | GSM4626766 | Normal |
| GSM4626766_ACTGTCCGTACTIONAGC-1 | GSM4626766 | Normal |
| GSM4626766_ACTGTCCGTCGAATCT-1   | GSM4626766 | Normal |
| GSM4626766_ACTGTCCGTTATCCGA-1   | GSM4626766 | Normal |
| GSM4626766_ACTGTCCGTTGTCTTT-1   | GSM4626766 | Normal |
| GSM4626766_ACTGTCCCTACCACCT-1   | GSM4626766 | Normal |
| GSM4626766_ACTTACTAGAAAGTGG-1   | GSM4626766 | Normal |
| GSM4626766_ACTTACTAGAAGATTC-1   | GSM4626766 | Normal |
| GSM4626766_ACTTACTAGACTTGAA-1   | GSM4626766 | Normal |
| GSM4626766_ACTTACTAGATCTGAA-1   | GSM4626766 | Normal |
| GSM4626766_ACTTACTAGCGATTCT-1   | GSM4626766 | Normal |
| GSM4626766_ACTTACTAGCTGCCCA-1   | GSM4626766 | Normal |
| GSM4626766_ACTTACTCAACACCCG-1   | GSM4626766 | Normal |
| GSM4626766_ACTTACTCAATGACCT-1   | GSM4626766 | Normal |
| GSM4626766_ACTTACTCAGTAGAGC-1   | GSM4626766 | Normal |
| GSM4626766_ACTTACTCATCCGTGG-1   | GSM4626766 | Normal |
| GSM4626766_ACTTACTGTCAGTGGA-1   | GSM4626766 | Normal |
| GSM4626766_ACTTACTGTCTAGCCG-1   | GSM4626766 | Normal |
| GSM4626766_ACTTACTGTTCCCTCA-1   | GSM4626766 | Normal |
| GSM4626766_ACTTACTTCCCATTAT-1   | GSM4626766 | Normal |
| GSM4626766_ACTTACTTCCGTACAA-1   | GSM4626766 | Normal |

|                                      |            |        |
|--------------------------------------|------------|--------|
| GSM4626766_ACTTACTTCGTGTAGT-1        | GSM4626766 | Normal |
| GSM4626766_ACTTGTTAGACCTTTG-1        | GSM4626766 | Normal |
| GSM4626766_ACTTGTTAGATGAGAG-1        | GSM4626766 | Normal |
| GSM4626766_ACTTGTTAGCGATATA-1        | GSM4626766 | Normal |
| GSM4626766_ACTTGTTAGGCACATG-1        | GSM4626766 | Normal |
| GSM4626766_ACTTGTTCAATAAGCA-1        | GSM4626766 | Normal |
| GSM4626766_ACTTGTTCAAGCCACCA-1       | GSM4626766 | Normal |
| GSM4626766_ACTTGTTCAAGTATAAG-1       | GSM4626766 | Normal |
| GSM4626766_ACTTGTTCAAGTATGACATC-1    | GSM4626766 | Normal |
| GSM4626766_ACTTGTTCAAGTATGCATGT-1    | GSM4626766 | Normal |
| GSM4626766_ACTTGTTTCAAGTTGAC-1       | GSM4626766 | Normal |
| GSM4626766_ACTTGTTTCAAGTTGATCCC-1    | GSM4626766 | Normal |
| GSM4626766_ACTTGTTTCAAGTTGATCCT-1    | GSM4626766 | Normal |
| GSM4626766_ACTTGTTTCAAGTTGATCCTTC-1  | GSM4626766 | Normal |
| GSM4626766_ACTTTCAAGCACGCCT-1        | GSM4626766 | Normal |
| GSM4626766_ACTTTCAAGGTCCGGAT-1       | GSM4626766 | Normal |
| GSM4626766_ACTTTCAAGTTCCGCGC-1       | GSM4626766 | Normal |
| GSM4626766_ACTTTCAAGTCCGACG-1        | GSM4626766 | Normal |
| GSM4626766_ACTTTCAAGTCCGACA-1        | GSM4626766 | Normal |
| GSM4626766_ACTTTCAAGTCCGACGT-1       | GSM4626766 | Normal |
| GSM4626766_ACTTTCAAGTCCGACGC-1       | GSM4626766 | Normal |
| GSM4626766_ACTTTCAAGTCCGACGTGAT-1    | GSM4626766 | Normal |
| GSM4626766_ACTTTCAAGTCCGACGTGATACG-1 | GSM4626766 | Normal |
| GSM4626766_ACTTTCAAGTCCGACGTGAGGT-1  | GSM4626766 | Normal |
| GSM4626766_AGAATAGAGACAGGCT-1        | GSM4626766 | Normal |
| GSM4626766_AGAATAGAGACTAAGT-1        | GSM4626766 | Normal |
| GSM4626766_AGAATAGAGCCAACAG-1        | GSM4626766 | Normal |
| GSM4626766_AGAATAGAGCTATGCT-1        | GSM4626766 | Normal |
| GSM4626766_AGAATAGAGGCGCTCT-1        | GSM4626766 | Normal |
| GSM4626766_AGAATAGCACGAAATA-1        | GSM4626766 | Normal |
| GSM4626766_AGAATAGCACGTTTCG-1        | GSM4626766 | Normal |
| GSM4626766_AGAATAGGTAATTGGA-1        | GSM4626766 | Normal |
| GSM4626766_AGAATAGGTGTGAATA-1        | GSM4626766 | Normal |
| GSM4626766_AGAATAGGTTTCGCTAA-1       | GSM4626766 | Normal |
| GSM4626766_AGAATAGTCAGAGGTG-1        | GSM4626766 | Normal |
| GSM4626766_AGAATAGTCAGTGCAT-1        | GSM4626766 | Normal |
| GSM4626766_AGAATAGTCCCAAGTA-1        | GSM4626766 | Normal |
| GSM4626766_AGACGTTAGAGTCGGT-1        | GSM4626766 | Normal |
| GSM4626766_AGACGTTAGATGTGGC-1        | GSM4626766 | Normal |
| GSM4626766_AGACGTTAGCACACAG-1        | GSM4626766 | Normal |
| GSM4626766_AGACGTTAGCCACTAT-1        | GSM4626766 | Normal |
| GSM4626766_AGACGTTAGCTGAAAT-1        | GSM4626766 | Normal |
| GSM4626766_AGACGTTCAAAGGAAG-1        | GSM4626766 | Normal |
| GSM4626766_AGACGTTCAAGGAGT-1         | GSM4626766 | Normal |
| GSM4626766_AGACGTTCAAGGATC-1         | GSM4626766 | Normal |
| GSM4626766_AGACGTTCAAGGCTGGC-1       | GSM4626766 | Normal |
| GSM4626766_AGACGTTGTGCCTGGT-1        | GSM4626766 | Normal |
| GSM4626766_AGACGTTGTGTGACCC-1        | GSM4626766 | Normal |
| GSM4626766_AGACGTTGTGTTTCGAT-1       | GSM4626766 | Normal |
| GSM4626766_AGACGTTTCTGGCGAC-1        | GSM4626766 | Normal |
| GSM4626766_AGAGCGAAGCGATCCC-1        | GSM4626766 | Normal |
| GSM4626766_AGAGCGACAAGAAGAG-1        | GSM4626766 | Normal |
| GSM4626766_AGAGCGACACTGCCAG-1        | GSM4626766 | Normal |
| GSM4626766_AGAGCGACACTTCTGC-1        | GSM4626766 | Normal |
| GSM4626766_AGAGCGACATGTCCTC-1        | GSM4626766 | Normal |
| GSM4626766_AGAGCGAGTAAGTGTA-1        | GSM4626766 | Normal |
| GSM4626766_AGAGCGAGTACTTCTT-1        | GSM4626766 | Normal |

|                                |            |        |
|--------------------------------|------------|--------|
| GSM4626766_AGAGCGAGTCTTCGTC-1  | GSM4626766 | Normal |
| GSM4626766_AGAGCGAGTTAAAGAC-1  | GSM4626766 | Normal |
| GSM4626766_AGAGCGAGTTCGTGAT-1  | GSM4626766 | Normal |
| GSM4626766_AGAGCGATCAACGCTA-1  | GSM4626766 | Normal |
| GSM4626766_AGAGCGATCAGAGGTG-1  | GSM4626766 | Normal |
| GSM4626766_AGAGCGATCCTTAATC-1  | GSM4626766 | Normal |
| GSM4626766_AGAGCGATCCTTTCTC-1  | GSM4626766 | Normal |
| GSM4626766_AGAGCGATCTGCGGCA-1  | GSM4626766 | Normal |
| GSM4626766_AGAGCTTAGCGATCCC-1  | GSM4626766 | Normal |
| GSM4626766_AGAGCTTAGCGTTTAC-1  | GSM4626766 | Normal |
| GSM4626766_AGAGCTTAGTGTCTCA-1  | GSM4626766 | Normal |
| GSM4626766_AGAGCTTCAAAGCAAT-1  | GSM4626766 | Normal |
| GSM4626766_AGAGCTTCAAGCTGAG-1  | GSM4626766 | Normal |
| GSM4626766_AGAGCTTCACGCCAGT-1  | GSM4626766 | Normal |
| GSM4626766_AGAGCTTGTACCGTTA-1  | GSM4626766 | Normal |
| GSM4626766_AGAGCTTGTATCAGTC-1  | GSM4626766 | Normal |
| GSM4626766_AGAGCTTGTGATGTGG-1  | GSM4626766 | Normal |
| GSM4626766_AGAGCTTGTTCGAATC-1  | GSM4626766 | Normal |
| GSM4626766_AGAGCTTGTTGTACAC-1  | GSM4626766 | Normal |
| GSM4626766_AGAGCTTTCTGATACG-1  | GSM4626766 | Normal |
| GSM4626766_AGAGTGGAGAAACGAG-1  | GSM4626766 | Normal |
| GSM4626766_AGAGTGGAGAGAACAG-1  | GSM4626766 | Normal |
| GSM4626766_AGAGTGGAGAGCTATA-1  | GSM4626766 | Normal |
| GSM4626766_AGAGTGGAGATATGCA-1  | GSM4626766 | Normal |
| GSM4626766_AGAGTGGAGCACCGCT-1  | GSM4626766 | Normal |
| GSM4626766_AGAGTGGAGTATCGAA-1  | GSM4626766 | Normal |
| GSM4626766_AGAGTGGCACTGTCCGG-1 | GSM4626766 | Normal |
| GSM4626766_AGAGTGGCAGCTCCGA-1  | GSM4626766 | Normal |
| GSM4626766_AGAGTGGCATAAAGGT-1  | GSM4626766 | Normal |
| GSM4626766_AGAGTGGGTCTAGCCG-1  | GSM4626766 | Normal |
| GSM4626766_AGAGTGGGTGCTGTAT-1  | GSM4626766 | Normal |
| GSM4626766_AGAGTGGGTTTGACAC-1  | GSM4626766 | Normal |
| GSM4626766_AGAGTGGTCCGATGTT-1  | GSM4626766 | Normal |
| GSM4626766_AGAGTGGTCTACTATC-1  | GSM4626766 | Normal |
| GSM4626766_AGAGTGGTCTTAGCCC-1  | GSM4626766 | Normal |
| GSM4626766_AGATCTGAGTGCAAGC-1  | GSM4626766 | Normal |
| GSM4626766_AGATCTGAGTGCGTGA-1  | GSM4626766 | Normal |
| GSM4626766_AGATCTGCATGAACCT-1  | GSM4626766 | Normal |
| GSM4626766_AGATCTGGTCTAGCCG-1  | GSM4626766 | Normal |
| GSM4626766_AGATCTGTCACCATAG-1  | GSM4626766 | Normal |
| GSM4626766_AGATCTGTCCTGCCAT-1  | GSM4626766 | Normal |
| GSM4626766_AGATTGCAGAACAAC-1   | GSM4626766 | Normal |
| GSM4626766_AGATTGCAGAGTAAGG-1  | GSM4626766 | Normal |
| GSM4626766_AGATTGCAGCACGCCT-1  | GSM4626766 | Normal |
| GSM4626766_AGATTGCAGGCCGAAT-1  | GSM4626766 | Normal |
| GSM4626766_AGATTGCCATCACGAT-1  | GSM4626766 | Normal |
| GSM4626766_AGATTGCGTCCGAATT-1  | GSM4626766 | Normal |
| GSM4626766_AGATTGCGTGCGCTTG-1  | GSM4626766 | Normal |
| GSM4626766_AGATTGCGTTGGTGG-1   | GSM4626766 | Normal |
| GSM4626766_AGATTGCTCAGCAACT-1  | GSM4626766 | Normal |
| GSM4626766_AGATTGCTCCAGAGGA-1  | GSM4626766 | Normal |
| GSM4626766_AGATTGCTCCGGGTGT-1  | GSM4626766 | Normal |
| GSM4626766_AGCAGCCAGAAACCAT-1  | GSM4626766 | Normal |
| GSM4626766_AGCAGCCAGACATAAC-1  | GSM4626766 | Normal |
| GSM4626766_AGCAGCCAGAGGTAGA-1  | GSM4626766 | Normal |
| GSM4626766_AGCAGCCAGGGTCGAT-1  | GSM4626766 | Normal |
| GSM4626766_AGCAGCCCAATCCAAC-1  | GSM4626766 | Normal |

|                                |            |        |
|--------------------------------|------------|--------|
| GSM4626766_AGCAGCCCACCGGAAA-1  | GSM4626766 | Normal |
| GSM4626766_AGCAGCCCATAGAAAC-1  | GSM4626766 | Normal |
| GSM4626766_AGCAGCCGTCACTGGC-1  | GSM4626766 | Normal |
| GSM4626766_AGCAGCCGTCATACTG-1  | GSM4626766 | Normal |
| GSM4626766_AGCAGCCGTGATGATA-1  | GSM4626766 | Normal |
| GSM4626766_AGCAGCCTCAACGCTA-1  | GSM4626766 | Normal |
| GSM4626766_AGCAGCCTCAATCACG-1  | GSM4626766 | Normal |
| GSM4626766_AGCAGCCTCACCACCT-1  | GSM4626766 | Normal |
| GSM4626766_AGCAGCCTCATGTGGT-1  | GSM4626766 | Normal |
| GSM4626766_AGCAGCCTCCATTTA-1   | GSM4626766 | Normal |
| GSM4626766_AGCAGCCTCCGTAGTA-1  | GSM4626766 | Normal |
| GSM4626766_AGCAGCCTCTGATACG-1  | GSM4626766 | Normal |
| GSM4626766_AGCAGCCTCTTTACGT-1  | GSM4626766 | Normal |
| GSM4626766_AGCATACAGGGAACGG-1  | GSM4626766 | Normal |
| GSM4626766_AGCATACAGGGATACC-1  | GSM4626766 | Normal |
| GSM4626766_AGCATACGTAGAGGAA-1  | GSM4626766 | Normal |
| GSM4626766_AGCATACGTAGTACCT-1  | GSM4626766 | Normal |
| GSM4626766_AGCATACGTACCTAA-1   | GSM4626766 | Normal |
| GSM4626766_AGCATACTCACGCATA-1  | GSM4626766 | Normal |
| GSM4626766_AGCATACTCGGCTTGG-1  | GSM4626766 | Normal |
| GSM4626766_AGCATACTCGTTACGA-1  | GSM4626766 | Normal |
| GSM4626766_AGCATACTCTCTAAGG-1  | GSM4626766 | Normal |
| GSM4626766_AGCATACTCTTTAGGG-1  | GSM4626766 | Normal |
| GSM4626766_AGCATACTCTTTAGTC-1  | GSM4626766 | Normal |
| GSM4626766_AGCCTAACAAATGGAGC-1 | GSM4626766 | Normal |
| GSM4626766_AGCCTAACACAAGCCC-1  | GSM4626766 | Normal |
| GSM4626766_AGCCTAACACAGCCCA-1  | GSM4626766 | Normal |
| GSM4626766_AGCCTAACACGGTAGA-1  | GSM4626766 | Normal |
| GSM4626766_AGCCTAACACGTCTCT-1  | GSM4626766 | Normal |
| GSM4626766_AGCCTAACAGACGTAG-1  | GSM4626766 | Normal |
| GSM4626766_AGCCTAACATCGACGC-1  | GSM4626766 | Normal |
| GSM4626766_AGCCTAAGTAGATTAG-1  | GSM4626766 | Normal |
| GSM4626766_AGCCTAAGTAGGACAC-1  | GSM4626766 | Normal |
| GSM4626766_AGCCTAAGTGCGATAG-1  | GSM4626766 | Normal |
| GSM4626766_AGCCTAATCACATGCA-1  | GSM4626766 | Normal |
| GSM4626766_AGCCTAATCAGCACAT-1  | GSM4626766 | Normal |
| GSM4626766_AGCCTAATCCATTTA-1   | GSM4626766 | Normal |
| GSM4626766_AGCCTAATCCTACAGA-1  | GSM4626766 | Normal |
| GSM4626766_AGCCTAATCGCCTGTT-1  | GSM4626766 | Normal |
| GSM4626766_AGCCTAATCTGTCTCG-1  | GSM4626766 | Normal |
| GSM4626766_AGCGGTCAGATCCCGC-1  | GSM4626766 | Normal |
| GSM4626766_AGCGGTCAGGAATTAC-1  | GSM4626766 | Normal |
| GSM4626766_AGCGGTCAGGATGGTC-1  | GSM4626766 | Normal |
| GSM4626766_AGCGGTCAGTGTGTTG-1  | GSM4626766 | Normal |
| GSM4626766_AGCGGTCCAAGTTGTC-1  | GSM4626766 | Normal |
| GSM4626766_AGCGGTCCAGACGTAG-1  | GSM4626766 | Normal |
| GSM4626766_AGCGGTCCAGCGAACA-1  | GSM4626766 | Normal |
| GSM4626766_AGCGGTCTCAGAGGTG-1  | GSM4626766 | Normal |
| GSM4626766_AGCGGTCTCCAAGTAC-1  | GSM4626766 | Normal |
| GSM4626766_AGCGGTCTCTCTTGAT-1  | GSM4626766 | Normal |
| GSM4626766_AGCGTATAGTGGCACA-1  | GSM4626766 | Normal |
| GSM4626766_AGCGTATCAAAGTACT-1  | GSM4626766 | Normal |
| GSM4626766_AGCGTATCAATCTGCA-1  | GSM4626766 | Normal |
| GSM4626766_AGCGTATCACAAAGTAA-1 | GSM4626766 | Normal |
| GSM4626766_AGCGTATCACTCTGTC-1  | GSM4626766 | Normal |
| GSM4626766_AGCGTATCATCCTAGA-1  | GSM4626766 | Normal |
| GSM4626766_AGCGTATGTACTCAAC-1  | GSM4626766 | Normal |

|                                |            |        |
|--------------------------------|------------|--------|
| GSM4626766_AGCGTATGTATATGAG-1  | GSM4626766 | Normal |
| GSM4626766_AGCGTATGTCCGCTGA-1  | GSM4626766 | Normal |
| GSM4626766_AGCGTATGTCTGCCAG-1  | GSM4626766 | Normal |
| GSM4626766_AGCGTATGTGCACTTA-1  | GSM4626766 | Normal |
| GSM4626766_AGCGTATTCCGCTGTT-1  | GSM4626766 | Normal |
| GSM4626766_AGCGTATTCGTATCAG-1  | GSM4626766 | Normal |
| GSM4626766_AGCGTCGAGAACAATC-1  | GSM4626766 | Normal |
| GSM4626766_AGCGTCGAGCACAGGT-1  | GSM4626766 | Normal |
| GSM4626766_AGCGTCGCAAGGACTG-1  | GSM4626766 | Normal |
| GSM4626766_AGCGTCGCAGCCTTGG-1  | GSM4626766 | Normal |
| GSM4626766_AGCGTCGGTTCGGCTCA-1 | GSM4626766 | Normal |
| GSM4626766_AGCGTCGGTGCTAGCC-1  | GSM4626766 | Normal |
| GSM4626766_AGCGTCGGTTCGGCAC-1  | GSM4626766 | Normal |
| GSM4626766_AGCGTCGGTTCGTCTC-1  | GSM4626766 | Normal |
| GSM4626766_AGCGTCGGTTGAACTC-1  | GSM4626766 | Normal |
| GSM4626766_AGCGTCGGTTGCTCCT-1  | GSM4626766 | Normal |
| GSM4626766_AGCGTCGTCAAGAAGT-1  | GSM4626766 | Normal |
| GSM4626766_AGCGTCGTCCGCGTTT-1  | GSM4626766 | Normal |
| GSM4626766_AGCGTCGTCTCTAGAAC-1 | GSM4626766 | Normal |
| GSM4626766_AGCGTCGTCTACTATC-1  | GSM4626766 | Normal |
| GSM4626766_AGCGTCGTCTTGGGTA-1  | GSM4626766 | Normal |
| GSM4626766_AGCTCCTAGCCCGAAA-1  | GSM4626766 | Normal |
| GSM4626766_AGCTCCTAGGCGACAT-1  | GSM4626766 | Normal |
| GSM4626766_AGCTCCTCACATCTTT-1  | GSM4626766 | Normal |
| GSM4626766_AGCTCCTCATGTAAGA-1  | GSM4626766 | Normal |
| GSM4626766_AGCTCCTCATGTAGTC-1  | GSM4626766 | Normal |
| GSM4626766_AGCTCCTGTAAGTAGT-1  | GSM4626766 | Normal |
| GSM4626766_AGCTCCTGTCCGCTGA-1  | GSM4626766 | Normal |
| GSM4626766_AGCTCCTGTTCCCGAG-1  | GSM4626766 | Normal |
| GSM4626766_AGCTCCTTCCGATATG-1  | GSM4626766 | Normal |
| GSM4626766_AGCTCTCAGGCCCGTT-1  | GSM4626766 | Normal |
| GSM4626766_AGCTCTCAGTCGAGTG-1  | GSM4626766 | Normal |
| GSM4626766_AGCTCTCCACATTTCT-1  | GSM4626766 | Normal |
| GSM4626766_AGCTCTCCACTCGACG-1  | GSM4626766 | Normal |
| GSM4626766_AGCTCTCGTAGCCTCG-1  | GSM4626766 | Normal |
| GSM4626766_AGCTCTCGTCTCTCGT-1  | GSM4626766 | Normal |
| GSM4626766_AGCTCTCTCACTTACT-1  | GSM4626766 | Normal |
| GSM4626766_AGCTCTCTCCTATTCA-1  | GSM4626766 | Normal |
| GSM4626766_AGCTCTCTCCTCATT-1   | GSM4626766 | Normal |
| GSM4626766_AGCTCTCTCGTAGGTT-1  | GSM4626766 | Normal |
| GSM4626766_AGCTCTCTCGTTTATC-1  | GSM4626766 | Normal |
| GSM4626766_AGCTTGAAGACTAAGT-1  | GSM4626766 | Normal |
| GSM4626766_AGCTTGAAGACTCGGA-1  | GSM4626766 | Normal |
| GSM4626766_AGCTTGAAGCCAGTTT-1  | GSM4626766 | Normal |
| GSM4626766_AGCTTGAAGCTGGAAC-1  | GSM4626766 | Normal |
| GSM4626766_AGCTTGAAGGCAAAGA-1  | GSM4626766 | Normal |
| GSM4626766_AGCTTGAAGGCATGGT-1  | GSM4626766 | Normal |
| GSM4626766_AGCTTGAAGTGTGAAT-1  | GSM4626766 | Normal |
| GSM4626766_AGCTTGACAACGATCT-1  | GSM4626766 | Normal |
| GSM4626766_AGCTTGACAAGGACTG-1  | GSM4626766 | Normal |
| GSM4626766_AGCTTGACACCGCTAG-1  | GSM4626766 | Normal |
| GSM4626766_AGCTTGACAGGGCATA-1  | GSM4626766 | Normal |
| GSM4626766_AGCTTGAGTACCCAAT-1  | GSM4626766 | Normal |
| GSM4626766_AGCTTGAGTGCCTTGG-1  | GSM4626766 | Normal |
| GSM4626766_AGCTTGATCCAACCAA-1  | GSM4626766 | Normal |
| GSM4626766_AGCTTGATCCGAAGAG-1  | GSM4626766 | Normal |
| GSM4626766_AGCTTGATCCTGCCAT-1  | GSM4626766 | Normal |



|                                |            |        |
|--------------------------------|------------|--------|
| GSM4626766_AGCTTGATCGACCAGC-1  | GSM4626766 | Normal |
| GSM4626766_AGCTTGATCGCACTCT-1  | GSM4626766 | Normal |
| GSM4626766_AGCTTGATCTCAAACG-1  | GSM4626766 | Normal |
| GSM4626766_AGCTTGATCTGGTGTA-1  | GSM4626766 | Normal |
| GSM4626766_AGGCCACAGATAGTCA-1  | GSM4626766 | Normal |
| GSM4626766_AGGCCACAGCCACCTG-1  | GSM4626766 | Normal |
| GSM4626766_AGGCCACCAATAGAGT-1  | GSM4626766 | Normal |
| GSM4626766_AGGCCACCAATCTACG-1  | GSM4626766 | Normal |
| GSM4626766_AGGCCACCACATAACC-1  | GSM4626766 | Normal |
| GSM4626766_AGGCCACCACATGGGA-1  | GSM4626766 | Normal |
| GSM4626766_AGGCCACCACTCGACG-1  | GSM4626766 | Normal |
| GSM4626766_AGGCCACCAGCATGAG-1  | GSM4626766 | Normal |
| GSM4626766_AGGCCACCATCCCATC-1  | GSM4626766 | Normal |
| GSM4626766_AGGCCACGTACAGCAG-1  | GSM4626766 | Normal |
| GSM4626766_AGGCCACGTAGGAGTC-1  | GSM4626766 | Normal |
| GSM4626766_AGGCCACGTTACGCGC-1  | GSM4626766 | Normal |
| GSM4626766_AGGCCACGTTCCCGAG-1  | GSM4626766 | Normal |
| GSM4626766_AGGCCACTCGGTTCCGG-1 | GSM4626766 | Normal |
| GSM4626766_AGGCCACTCGTAGGTT-1  | GSM4626766 | Normal |
| GSM4626766_AGGCCACTCTTATCTG-1  | GSM4626766 | Normal |
| GSM4626766_AGGCCGTAGAGGTTAT-1  | GSM4626766 | Normal |
| GSM4626766_AGGCCGTAGCTAAGAT-1  | GSM4626766 | Normal |
| GSM4626766_AGGCCGTAGGACAGAA-1  | GSM4626766 | Normal |
| GSM4626766_AGGCCGTAGGCAGTCA-1  | GSM4626766 | Normal |
| GSM4626766_AGGCCGTAGGCTCAGA-1  | GSM4626766 | Normal |
| GSM4626766_AGGCCGTCACGACTCG-1  | GSM4626766 | Normal |
| GSM4626766_AGGCCGTCATACCATG-1  | GSM4626766 | Normal |
| GSM4626766_AGGCCGTGTCACCTAA-1  | GSM4626766 | Normal |
| GSM4626766_AGGCCGTGTCGAATT-1   | GSM4626766 | Normal |
| GSM4626766_AGGCCGTGTTGCTCCT-1  | GSM4626766 | Normal |
| GSM4626766_AGGCCGTTCCAAACAC-1  | GSM4626766 | Normal |
| GSM4626766_AGGCCGTTCCATGAAC-1  | GSM4626766 | Normal |
| GSM4626766_AGGCCGTTCGTGACAT-1  | GSM4626766 | Normal |
| GSM4626766_AGGGAGTAGAGCAATT-1  | GSM4626766 | Normal |
| GSM4626766_AGGGAGTAGGGTATCG-1  | GSM4626766 | Normal |
| GSM4626766_AGGGAGTAGGGTTCCC-1  | GSM4626766 | Normal |
| GSM4626766_AGGGAGTAGTTACCCA-1  | GSM4626766 | Normal |
| GSM4626766_AGGGAGTCAATGGAGC-1  | GSM4626766 | Normal |
| GSM4626766_AGGGAGTCACCAGCAC-1  | GSM4626766 | Normal |
| GSM4626766_AGGGAGTCACGTCTCT-1  | GSM4626766 | Normal |
| GSM4626766_AGGGAGTCAGACGCAA-1  | GSM4626766 | Normal |
| GSM4626766_AGGGAGTCATGACGGA-1  | GSM4626766 | Normal |
| GSM4626766_AGGGAGTCATGCAATC-1  | GSM4626766 | Normal |
| GSM4626766_AGGGAGTGATATAGTAG-1 | GSM4626766 | Normal |
| GSM4626766_AGGGAGTGACTCAT-1    | GSM4626766 | Normal |
| GSM4626766_AGGGAGTGTTCCATGA-1  | GSM4626766 | Normal |
| GSM4626766_AGGGAGTTCACAGTAC-1  | GSM4626766 | Normal |
| GSM4626766_AGGGAGTTCAGTTTGG-1  | GSM4626766 | Normal |
| GSM4626766_AGGGAGTTCGGTGTGCG-1 | GSM4626766 | Normal |
| GSM4626766_AGGGATGAGGACATTA-1  | GSM4626766 | Normal |
| GSM4626766_AGGGATGCAACACGCC-1  | GSM4626766 | Normal |
| GSM4626766_AGGGATGGTATAGTAG-1  | GSM4626766 | Normal |
| GSM4626766_AGGGATGGTATATGGA-1  | GSM4626766 | Normal |
| GSM4626766_AGGGATGGTCCGTCAG-1  | GSM4626766 | Normal |
| GSM4626766_AGGGATGGTTTGGGCC-1  | GSM4626766 | Normal |
| GSM4626766_AGGGATGTCGGACAAG-1  | GSM4626766 | Normal |
| GSM4626766_AGGGATGTCTCGATGA-1  | GSM4626766 | Normal |

|                                |            |        |
|--------------------------------|------------|--------|
| GSM4626766_AGGGATGTCTGAAAGA-1  | GSM4626766 | Normal |
| GSM4626766_AGGGATGTCTGAGTGT-1  | GSM4626766 | Normal |
| GSM4626766_AGGGTGAAGAGCTATA-1  | GSM4626766 | Normal |
| GSM4626766_AGGGTGAAGATATACG-1  | GSM4626766 | Normal |
| GSM4626766_AGGGTGAAGCGATGAC-1  | GSM4626766 | Normal |
| GSM4626766_AGGGTGAAGGCATGGT-1  | GSM4626766 | Normal |
| GSM4626766_AGGGTGAAGGCTAGCA-1  | GSM4626766 | Normal |
| GSM4626766_AGGGTGAAGTGAAGAG-1  | GSM4626766 | Normal |
| GSM4626766_AGGGTGACACGCGAAA-1  | GSM4626766 | Normal |
| GSM4626766_AGGGTGACAGATTGCT-1  | GSM4626766 | Normal |
| GSM4626766_AGGGTGAGTAAATGAC-1  | GSM4626766 | Normal |
| GSM4626766_AGGGTGAGTACCTACA-1  | GSM4626766 | Normal |
| GSM4626766_AGGGTGATCAGCTTAG-1  | GSM4626766 | Normal |
| GSM4626766_AGGGTGATCATACGGT-1  | GSM4626766 | Normal |
| GSM4626766_AGGGTGATCCACGACG-1  | GSM4626766 | Normal |
| GSM4626766_AGGGTGATCCTCATT-1   | GSM4626766 | Normal |
| GSM4626766_AGGGTGATCTGTACGA-1  | GSM4626766 | Normal |
| GSM4626766_AGGTCATAGATAGCAT-1  | GSM4626766 | Normal |
| GSM4626766_AGGTCATAGCCAACAG-1  | GSM4626766 | Normal |
| GSM4626766_AGGTCATAGTAAGTAC-1  | GSM4626766 | Normal |
| GSM4626766_AGGTCATCAATGGATA-1  | GSM4626766 | Normal |
| GSM4626766_AGGTCATCAGATCCAT-1  | GSM4626766 | Normal |
| GSM4626766_AGGTCATCAGCTATTG-1  | GSM4626766 | Normal |
| GSM4626766_AGGTCATGTGAGGGTT-1  | GSM4626766 | Normal |
| GSM4626766_AGGTCATGTTCCGGCT-1  | GSM4626766 | Normal |
| GSM4626766_AGGTCATTCCGCAAAT-1  | GSM4626766 | Normal |
| GSM4626766_AGGTCATTCTGGTATG-1  | GSM4626766 | Normal |
| GSM4626766_AGGTCCGAGAAACGAG-1  | GSM4626766 | Normal |
| GSM4626766_AGGTCCGAGAGATGAG-1  | GSM4626766 | Normal |
| GSM4626766_AGGTCCGAGCCCAACC-1  | GSM4626766 | Normal |
| GSM4626766_AGGTCCGAGCTAACAA-1  | GSM4626766 | Normal |
| GSM4626766_AGGTCCGAGTGCGTGA-1  | GSM4626766 | Normal |
| GSM4626766_AGGTCCGCACAGTCGC-1  | GSM4626766 | Normal |
| GSM4626766_AGGTCCGCATTTCGACA-1 | GSM4626766 | Normal |
| GSM4626766_AGGTCCGGTCCATCCT-1  | GSM4626766 | Normal |
| GSM4626766_AGGTCCGGTGTAAGTA-1  | GSM4626766 | Normal |
| GSM4626766_AGGTCCGGTTATCCGA-1  | GSM4626766 | Normal |
| GSM4626766_AGGTCCGTCAACGCTA-1  | GSM4626766 | Normal |
| GSM4626766_AGGTCCGTCAGCAACT-1  | GSM4626766 | Normal |
| GSM4626766_AGGTCCGTCAGCCTAA-1  | GSM4626766 | Normal |
| GSM4626766_AGGTCCGTCCACTCCA-1  | GSM4626766 | Normal |
| GSM4626766_AGGTCCGTCCAGAGGA-1  | GSM4626766 | Normal |
| GSM4626766_AGGTCCGTCTCGTTTA-1  | GSM4626766 | Normal |
| GSM4626766_AGGTCCGTCTGCGAC-1   | GSM4626766 | Normal |
| GSM4626766_AGTAGTCAGGTGACCA-1  | GSM4626766 | Normal |
| GSM4626766_AGTAGTCCACGTCTCT-1  | GSM4626766 | Normal |
| GSM4626766_AGTAGTCCAGACGCAA-1  | GSM4626766 | Normal |
| GSM4626766_AGTAGTCCATCCTTGC-1  | GSM4626766 | Normal |
| GSM4626766_AGTAGTCGTCTCCCTA-1  | GSM4626766 | Normal |
| GSM4626766_AGTAGTCGTTGACCC-1   | GSM4626766 | Normal |
| GSM4626766_AGTAGTCTCCGTTGTC-1  | GSM4626766 | Normal |
| GSM4626766_AGTAGTCTCGTCTGCT-1  | GSM4626766 | Normal |
| GSM4626766_AGTAGTCTCTGACCTC-1  | GSM4626766 | Normal |
| GSM4626766_AGTCTTTAGCCATCGC-1  | GSM4626766 | Normal |
| GSM4626766_AGTCTTTAGTAGGTGC-1  | GSM4626766 | Normal |
| GSM4626766_AGTCTTTGTAAGAGAG-1  | GSM4626766 | Normal |
| GSM4626766_AGTCTTTGTCAGAAGC-1  | GSM4626766 | Normal |

|                                |            |        |
|--------------------------------|------------|--------|
| GSM4626766_AGTCTTTGTGGTAACG-1  | GSM4626766 | Normal |
| GSM4626766_AGTCTTTTCATCGCTC-1  | GSM4626766 | Normal |
| GSM4626766_AGTCTTTTCGTGACAT-1  | GSM4626766 | Normal |
| GSM4626766_AGTGAGGCAACAACCT-1  | GSM4626766 | Normal |
| GSM4626766_AGTGAGGCACGAAACG-1  | GSM4626766 | Normal |
| GSM4626766_AGTGAGGCAGATCGGA-1  | GSM4626766 | Normal |
| GSM4626766_AGTGAGGCATACTCTT-1  | GSM4626766 | Normal |
| GSM4626766_AGTGAGGCATCCAACA-1  | GSM4626766 | Normal |
| GSM4626766_AGTGAGGGTGCGAAAC-1  | GSM4626766 | Normal |
| GSM4626766_AGTGAGGTCATCATT-1   | GSM4626766 | Normal |
| GSM4626766_AGTGAGGTCTTGCAAG-1  | GSM4626766 | Normal |
| GSM4626766_AGTGAGGTCTTGTTTG-1  | GSM4626766 | Normal |
| GSM4626766_AGTGGGAAGAGCTATA-1  | GSM4626766 | Normal |
| GSM4626766_AGTGGGAAGCCCGAAA-1  | GSM4626766 | Normal |
| GSM4626766_AGTGGGAAGGACACCA-1  | GSM4626766 | Normal |
| GSM4626766_AGTGGGAAGTCAAGGC-1  | GSM4626766 | Normal |
| GSM4626766_AGTGGGACAATTGCTG-1  | GSM4626766 | Normal |
| GSM4626766_AGTGGGACATCATCCC-1  | GSM4626766 | Normal |
| GSM4626766_AGTGGGAGTCAATGTC-1  | GSM4626766 | Normal |
| GSM4626766_AGTGGGAGTGTTTGTG-1  | GSM4626766 | Normal |
| GSM4626766_AGTGGGATCACAAATGC-1 | GSM4626766 | Normal |
| GSM4626766_AGTGGGATCCTGTAGA-1  | GSM4626766 | Normal |
| GSM4626766_AGTGTCAAGCGATTCT-1  | GSM4626766 | Normal |
| GSM4626766_AGTGTCAAGGCAGGTT-1  | GSM4626766 | Normal |
| GSM4626766_AGTGTCAAGTCCAGGA-1  | GSM4626766 | Normal |
| GSM4626766_AGTGTCACACAGGTTT-1  | GSM4626766 | Normal |
| GSM4626766_AGTGTCACACCGGAAA-1  | GSM4626766 | Normal |
| GSM4626766_AGTGTCACATGCATGT-1  | GSM4626766 | Normal |
| GSM4626766_AGTGTCAGTACAGCAG-1  | GSM4626766 | Normal |
| GSM4626766_AGTGTCAGTAGCACGA-1  | GSM4626766 | Normal |
| GSM4626766_AGTGTCAGTTCATGGT-1  | GSM4626766 | Normal |
| GSM4626766_AGTGTCATCACGATGT-1  | GSM4626766 | Normal |
| GSM4626766_AGTGTCATCATGTGGT-1  | GSM4626766 | Normal |
| GSM4626766_AGTGTCATCCGGGTGT-1  | GSM4626766 | Normal |
| GSM4626766_AGTGTCATCTGTTTGT-1  | GSM4626766 | Normal |
| GSM4626766_AGTTGGTAGACAAAGG-1  | GSM4626766 | Normal |
| GSM4626766_AGTTGGTAGAGGTAGA-1  | GSM4626766 | Normal |
| GSM4626766_AGTTGGTAGTCCGGTC-1  | GSM4626766 | Normal |
| GSM4626766_AGTTGGTCAGAAGCAC-1  | GSM4626766 | Normal |
| GSM4626766_AGTTGGTCATTGGCGC-1  | GSM4626766 | Normal |
| GSM4626766_AGTTGGTGTCGAAAC-1   | GSM4626766 | Normal |
| GSM4626766_AGTTGGTGTTGAGGTG-1  | GSM4626766 | Normal |
| GSM4626766_AGTTGGTTCATCACG-1   | GSM4626766 | Normal |
| GSM4626766_AGTTGGTTCACATGCA-1  | GSM4626766 | Normal |
| GSM4626766_AGTTGGTTCGCGT-1     | GSM4626766 | Normal |
| GSM4626766_AGTTGGTTCGTTAGTA-1  | GSM4626766 | Normal |
| GSM4626766_AGTTGGTTCGCTGCT-1   | GSM4626766 | Normal |
| GSM4626766_ATAACGCAGACTTGAA-1  | GSM4626766 | Normal |
| GSM4626766_ATAACGCAGGTAAACT-1  | GSM4626766 | Normal |
| GSM4626766_ATAACGCAGTGCTGCC-1  | GSM4626766 | Normal |
| GSM4626766_ATAACGCAGTGGAGAA-1  | GSM4626766 | Normal |
| GSM4626766_ATAACGCCAAGACGTG-1  | GSM4626766 | Normal |
| GSM4626766_ATAACGCCAAGTTCTG-1  | GSM4626766 | Normal |
| GSM4626766_ATAACGCCACGCCAGT-1  | GSM4626766 | Normal |
| GSM4626766_ATAACGCCAGGTGCCT-1  | GSM4626766 | Normal |
| GSM4626766_ATAACGCCTAATTGGA-1  | GSM4626766 | Normal |
| GSM4626766_ATAACGCCTATGAAAC-1  | GSM4626766 | Normal |

|                                |            |        |
|--------------------------------|------------|--------|
| GSM4626766_ATAACGCGTCATATGC-1  | GSM4626766 | Normal |
| GSM4626766_ATAACGCGTTGAGTTC-1  | GSM4626766 | Normal |
| GSM4626766_ATAACGCGTTTCGCTC-1  | GSM4626766 | Normal |
| GSM4626766_ATAAGAGAGCGATTCT-1  | GSM4626766 | Normal |
| GSM4626766_ATAAGAGAGGAGTCTG-1  | GSM4626766 | Normal |
| GSM4626766_ATAAGAGCAATAACGA-1  | GSM4626766 | Normal |
| GSM4626766_ATAAGAGCAGCGAACA-1  | GSM4626766 | Normal |
| GSM4626766_ATAAGAGCAGTGGGAT-1  | GSM4626766 | Normal |
| GSM4626766_ATAAGAGCATCACAAC-1  | GSM4626766 | Normal |
| GSM4626766_ATAAGAGCATGGTAGG-1  | GSM4626766 | Normal |
| GSM4626766_ATAAGAGGTCATATGC-1  | GSM4626766 | Normal |
| GSM4626766_ATAAGAGGTCCAAGTT-1  | GSM4626766 | Normal |
| GSM4626766_ATAAGAGGTGCGTGT-1   | GSM4626766 | Normal |
| GSM4626766_ATAAGAGGTTGTACAC-1  | GSM4626766 | Normal |
| GSM4626766_ATAAGAGTCGCACTCT-1  | GSM4626766 | Normal |
| GSM4626766_ATAAGAGTCTAACTGG-1  | GSM4626766 | Normal |
| GSM4626766_ATAAGAGTCTTACCTA-1  | GSM4626766 | Normal |
| GSM4626766_ATAGACCAGACAAAGG-1  | GSM4626766 | Normal |
| GSM4626766_ATAGACCAGAGTGAGA-1  | GSM4626766 | Normal |
| GSM4626766_ATAGACCAGGCTAGAC-1  | GSM4626766 | Normal |
| GSM4626766_ATAGACCAGTGTCCAT-1  | GSM4626766 | Normal |
| GSM4626766_ATAGACCCAATAAGCA-1  | GSM4626766 | Normal |
| GSM4626766_ATAGACCCACGACGAA-1  | GSM4626766 | Normal |
| GSM4626766_ATAGACCCAGACAGGT-1  | GSM4626766 | Normal |
| GSM4626766_ATAGACCCAGTCGATT-1  | GSM4626766 | Normal |
| GSM4626766_ATAGACCGTAAAGGAG-1  | GSM4626766 | Normal |
| GSM4626766_ATAGACCGTCTCTTTA-1  | GSM4626766 | Normal |
| GSM4626766_ATAGACCGTGTGCCTG-1  | GSM4626766 | Normal |
| GSM4626766_ATAGACCGTTGCGTTA-1  | GSM4626766 | Normal |
| GSM4626766_ATAGACCTCAGTTCGA-1  | GSM4626766 | Normal |
| GSM4626766_ATAGACCTCCTGCAGG-1  | GSM4626766 | Normal |
| GSM4626766_ATAGACCTCTGGTTCC-1  | GSM4626766 | Normal |
| GSM4626766_ATCACGAAGGAGTAGA-1  | GSM4626766 | Normal |
| GSM4626766_ATCACGAAGGGCATGT-1  | GSM4626766 | Normal |
| GSM4626766_ATCACGAAGTCATGCT-1  | GSM4626766 | Normal |
| GSM4626766_ATCACGACAACACCCG-1  | GSM4626766 | Normal |
| GSM4626766_ATCACGACAACGATGG-1  | GSM4626766 | Normal |
| GSM4626766_ATCACGACAAGACGTG-1  | GSM4626766 | Normal |
| GSM4626766_ATCACGACACAGGAGT-1  | GSM4626766 | Normal |
| GSM4626766_ATCACGACACGACTCG-1  | GSM4626766 | Normal |
| GSM4626766_ATCACGACATAGGATA-1  | GSM4626766 | Normal |
| GSM4626766_ATCACGAGTATAAACG-1  | GSM4626766 | Normal |
| GSM4626766_ATCACGAGTCCGTTAA-1  | GSM4626766 | Normal |
| GSM4626766_ATCACGAGTCCGCGTGT-1 | GSM4626766 | Normal |
| GSM4626766_ATCACGAGTGAGTATA-1  | GSM4626766 | Normal |
| GSM4626766_ATCACGAGTGTTTGTG-1  | GSM4626766 | Normal |
| GSM4626766_ATCACGAGTTCGCGCA-1  | GSM4626766 | Normal |
| GSM4626766_ATCACGAGTTGTACAC-1  | GSM4626766 | Normal |
| GSM4626766_ATCACGATCAGAGGTG-1  | GSM4626766 | Normal |
| GSM4626766_ATCATCTAGAGGGCTT-1  | GSM4626766 | Normal |
| GSM4626766_ATCATCTAGCACAGGT-1  | GSM4626766 | Normal |
| GSM4626766_ATCATCTAGCCATCGC-1  | GSM4626766 | Normal |
| GSM4626766_ATCATCTAGCGTAGTG-1  | GSM4626766 | Normal |
| GSM4626766_ATCATCTAGGCTAGGT-1  | GSM4626766 | Normal |
| GSM4626766_ATCATCTCAAACAACA-1  | GSM4626766 | Normal |
| GSM4626766_ATCATCTCAAAGGTGC-1  | GSM4626766 | Normal |
| GSM4626766_ATCATCTCAAGAAAGG-1  | GSM4626766 | Normal |

|                                |            |        |
|--------------------------------|------------|--------|
| GSM4626766_ATCATCTCACTAAGTC-1  | GSM4626766 | Normal |
| GSM4626766_ATCATCTCATATGAGA-1  | GSM4626766 | Normal |
| GSM4626766_ATCATCTGTGAAAGAG-1  | GSM4626766 | Normal |
| GSM4626766_ATCATCTGTTACGGAG-1  | GSM4626766 | Normal |
| GSM4626766_ATCATCTGTTCCGGGCT-1 | GSM4626766 | Normal |
| GSM4626766_ATCATCTGTTTGGCGC-1  | GSM4626766 | Normal |
| GSM4626766_ATCATCTTCACAAACC-1  | GSM4626766 | Normal |
| GSM4626766_ATCATCTTCGCAAAC-1   | GSM4626766 | Normal |
| GSM4626766_ATCATCTTCGCCTGTT-1  | GSM4626766 | Normal |
| GSM4626766_ATCATCTTCGCTTAGA-1  | GSM4626766 | Normal |
| GSM4626766_ATCATCTTCTGCTGTC-1  | GSM4626766 | Normal |
| GSM4626766_ATCATGGAGCGATAGC-1  | GSM4626766 | Normal |
| GSM4626766_ATCATGGAGTACGACG-1  | GSM4626766 | Normal |
| GSM4626766_ATCATGGCAAAC-1      | GSM4626766 | Normal |
| GSM4626766_ATCATGGGTCAGAATA-1  | GSM4626766 | Normal |
| GSM4626766_ATCATGGGTCATACTG-1  | GSM4626766 | Normal |
| GSM4626766_ATCATGGGTTCCATGA-1  | GSM4626766 | Normal |
| GSM4626766_ATCATGGTCAAACCGT-1  | GSM4626766 | Normal |
| GSM4626766_ATCATGGTCTCACATT-1  | GSM4626766 | Normal |
| GSM4626766_ATCCACCAGCGCTCCA-1  | GSM4626766 | Normal |
| GSM4626766_ATCCACCAGCGCTTAT-1  | GSM4626766 | Normal |
| GSM4626766_ATCCACCAGCGTTCCG-1  | GSM4626766 | Normal |
| GSM4626766_ATCCACCCAAAC-1      | GSM4626766 | Normal |
| GSM4626766_ATCCACCGTAAATACG-1  | GSM4626766 | Normal |
| GSM4626766_ATCCACCGTAGCGATG-1  | GSM4626766 | Normal |
| GSM4626766_ATCCACCGTGCACGAA-1  | GSM4626766 | Normal |
| GSM4626766_ATCCACCGTTCGTTGA-1  | GSM4626766 | Normal |
| GSM4626766_ATCCACCTCACGAAGG-1  | GSM4626766 | Normal |
| GSM4626766_ATCCACCTCTCTGTCTG-1 | GSM4626766 | Normal |
| GSM4626766_ATCCACCTCTCTTGAT-1  | GSM4626766 | Normal |
| GSM4626766_ATCCGAAAGATCGATA-1  | GSM4626766 | Normal |
| GSM4626766_ATCCGAAAGCTAGTCT-1  | GSM4626766 | Normal |
| GSM4626766_ATCCGAAAGTGTGAAT-1  | GSM4626766 | Normal |
| GSM4626766_ATCCGAACAGCGAACA-1  | GSM4626766 | Normal |
| GSM4626766_ATCCGAACAGTGACAG-1  | GSM4626766 | Normal |
| GSM4626766_ATCCGAACATGCGCAC-1  | GSM4626766 | Normal |
| GSM4626766_ATCCGAAGTAGCGTCC-1  | GSM4626766 | Normal |
| GSM4626766_ATCCGAAGTCAAAGCG-1  | GSM4626766 | Normal |
| GSM4626766_ATCCGAAGTCACTGGC-1  | GSM4626766 | Normal |
| GSM4626766_ATCCGAAGTCCGCTGA-1  | GSM4626766 | Normal |
| GSM4626766_ATCCGAAGTCTCCATC-1  | GSM4626766 | Normal |
| GSM4626766_ATCCGAAGTGATAAGT-1  | GSM4626766 | Normal |
| GSM4626766_ATCCGAAGTGTAACGG-1  | GSM4626766 | Normal |
| GSM4626766_ATCCGAAGTTGCCTCT-1  | GSM4626766 | Normal |
| GSM4626766_ATCCGAATCTCATTCA-1  | GSM4626766 | Normal |
| GSM4626766_ATCGAGTAGAAACCTA-1  | GSM4626766 | Normal |
| GSM4626766_ATCGAGTAGCAAATCA-1  | GSM4626766 | Normal |
| GSM4626766_ATCGAGTAGGAACTGC-1  | GSM4626766 | Normal |
| GSM4626766_ATCGAGTAGGCTATCT-1  | GSM4626766 | Normal |
| GSM4626766_ATCGAGTAGTTCGCGC-1  | GSM4626766 | Normal |
| GSM4626766_ATCGAGTCAATTGCTG-1  | GSM4626766 | Normal |
| GSM4626766_ATCGAGTACCACGTG-1   | GSM4626766 | Normal |
| GSM4626766_ATCGAGTCAGATGGGT-1  | GSM4626766 | Normal |
| GSM4626766_ATCGAGTCATCTCGCT-1  | GSM4626766 | Normal |
| GSM4626766_ATCGAGTCATGCAACT-1  | GSM4626766 | Normal |
| GSM4626766_ATCGAGTGTCACATC-1   | GSM4626766 | Normal |
| GSM4626766_ATCGAGTTCTACTATC-1  | GSM4626766 | Normal |

|                                |            |        |
|--------------------------------|------------|--------|
| GSM4626766_ATCGAGTTCTCAACTT-1  | GSM4626766 | Normal |
| GSM4626766_ATCGAGTTCTCGCTTG-1  | GSM4626766 | Normal |
| GSM4626766_ATCTACTAGAACAATC-1  | GSM4626766 | Normal |
| GSM4626766_ATCTACTAGAGTGACC-1  | GSM4626766 | Normal |
| GSM4626766_ATCTACTAGCCCAGCT-1  | GSM4626766 | Normal |
| GSM4626766_ATCTACTAGGAATGGA-1  | GSM4626766 | Normal |
| GSM4626766_ATCTACTAGTGTGAA-1   | GSM4626766 | Normal |
| GSM4626766_ATCTACTCAAATACAG-1  | GSM4626766 | Normal |
| GSM4626766_ATCTACTCACACGTT-1   | GSM4626766 | Normal |
| GSM4626766_ATCTACTGTGTGGCTC-1  | GSM4626766 | Normal |
| GSM4626766_ATCTACTTCTACGAGT-1  | GSM4626766 | Normal |
| GSM4626766_ATCTGCCAGACAGGCT-1  | GSM4626766 | Normal |
| GSM4626766_ATCTGCCAGCTTCGCG-1  | GSM4626766 | Normal |
| GSM4626766_ATCTGCCAAGCTGGA-1   | GSM4626766 | Normal |
| GSM4626766_ATCTGCCAATCTACG-1   | GSM4626766 | Normal |
| GSM4626766_ATCTGCCACAAGTAA-1   | GSM4626766 | Normal |
| GSM4626766_ATCTGCCAGACGCCT-1   | GSM4626766 | Normal |
| GSM4626766_ATCTGCCAGCTCGAC-1   | GSM4626766 | Normal |
| GSM4626766_ATCTGCCAGTATAAG-1   | GSM4626766 | Normal |
| GSM4626766_ATCTGCCATCCAACA-1   | GSM4626766 | Normal |
| GSM4626766_ATCTGCCGTAAGAGAG-1  | GSM4626766 | Normal |
| GSM4626766_ATCTGCCGTACCAGTT-1  | GSM4626766 | Normal |
| GSM4626766_ATCTGCCGTAGCTAAA-1  | GSM4626766 | Normal |
| GSM4626766_ATCTGCCGTCCAAGTT-1  | GSM4626766 | Normal |
| GSM4626766_ATCTGCCGTCTGACTAT-1 | GSM4626766 | Normal |
| GSM4626766_ATCTGCCGTCTAACGT-1  | GSM4626766 | Normal |
| GSM4626766_ATCTGCCGTTACGACT-1  | GSM4626766 | Normal |
| GSM4626766_ATCTGCCTCAACCATG-1  | GSM4626766 | Normal |
| GSM4626766_ATCTGCCTCAGTTTGG-1  | GSM4626766 | Normal |
| GSM4626766_ATCTGCCTCCAGGGCT-1  | GSM4626766 | Normal |
| GSM4626766_ATCTGCCTCGCAAAC-1   | GSM4626766 | Normal |
| GSM4626766_ATCTGCCTCGGTCCGA-1  | GSM4626766 | Normal |
| GSM4626766_ATGAGGGAGTCTCAAC-1  | GSM4626766 | Normal |
| GSM4626766_ATGAGGGCACACATGT-1  | GSM4626766 | Normal |
| GSM4626766_ATGAGGGCACAGGTTT-1  | GSM4626766 | Normal |
| GSM4626766_ATGAGGGCACTTGGAT-1  | GSM4626766 | Normal |
| GSM4626766_ATGAGGGCATCGGAAG-1  | GSM4626766 | Normal |
| GSM4626766_ATGAGGGGTACGAAAT-1  | GSM4626766 | Normal |
| GSM4626766_ATGAGGGGTCCGTTAA-1  | GSM4626766 | Normal |
| GSM4626766_ATGAGGGGTGAGGGTT-1  | GSM4626766 | Normal |
| GSM4626766_ATGAGGGGTGGTCTCG-1  | GSM4626766 | Normal |
| GSM4626766_ATGAGGGGTAGGGTG-1   | GSM4626766 | Normal |
| GSM4626766_ATGAGGGTTCGTGGAA-1  | GSM4626766 | Normal |
| GSM4626766_ATGCGATAGACACTAA-1  | GSM4626766 | Normal |
| GSM4626766_ATGCGATAGCACCGTC-1  | GSM4626766 | Normal |
| GSM4626766_ATGCGATAGGGCTTCC-1  | GSM4626766 | Normal |
| GSM4626766_ATGCGATCAATAAGCA-1  | GSM4626766 | Normal |
| GSM4626766_ATGCGATCAGCTTCGG-1  | GSM4626766 | Normal |
| GSM4626766_ATGCGATGTACCTACA-1  | GSM4626766 | Normal |
| GSM4626766_ATGCGATGTGCACTTA-1  | GSM4626766 | Normal |
| GSM4626766_ATGGGAGAGGGTTCGAT-1 | GSM4626766 | Normal |
| GSM4626766_ATGGGAGAGTACGATA-1  | GSM4626766 | Normal |
| GSM4626766_ATGGGAGCAATGGAGC-1  | GSM4626766 | Normal |
| GSM4626766_ATGGGAGCACAGGAGT-1  | GSM4626766 | Normal |
| GSM4626766_ATGGGAGCATGCAACT-1  | GSM4626766 | Normal |
| GSM4626766_ATGGGAGGTCCGAAGA-1  | GSM4626766 | Normal |
| GSM4626766_ATGGGAGGTCTCTTG-1   | GSM4626766 | Normal |

|                                |            |        |
|--------------------------------|------------|--------|
| GSM4626766_ATGGGAGGTTTGACAC-1  | GSM4626766 | Normal |
| GSM4626766_ATGGGAGTCACAATGC-1  | GSM4626766 | Normal |
| GSM4626766_ATGGGAGTCGGCGCAT-1  | GSM4626766 | Normal |
| GSM4626766_ATGGGAGTCTCGATGA-1  | GSM4626766 | Normal |
| GSM4626766_ATGTGTGAGATGTCGG-1  | GSM4626766 | Normal |
| GSM4626766_ATGTGTGAGCGTGAAC-1  | GSM4626766 | Normal |
| GSM4626766_ATGTGTGAGGCGTACA-1  | GSM4626766 | Normal |
| GSM4626766_ATGTGTGAGGTGTTAA-1  | GSM4626766 | Normal |
| GSM4626766_ATGTGTGCACAAGTAA-1  | GSM4626766 | Normal |
| GSM4626766_ATGTGTGCAGACAAGC-1  | GSM4626766 | Normal |
| GSM4626766_ATGTGTGCAGACGCCT-1  | GSM4626766 | Normal |
| GSM4626766_ATGTGTGCATGCCCGA-1  | GSM4626766 | Normal |
| GSM4626766_ATGTGTGGTAAACACA-1  | GSM4626766 | Normal |
| GSM4626766_ATGTGTGGTAAACGCG-1  | GSM4626766 | Normal |
| GSM4626766_ATGTGTGTCACTCCTG-1  | GSM4626766 | Normal |
| GSM4626766_ATGTGTGTCTTCAACT-1  | GSM4626766 | Normal |
| GSM4626766_ATTACTCAGAACAATC-1  | GSM4626766 | Normal |
| GSM4626766_ATTACTCAGGTACTCT-1  | GSM4626766 | Normal |
| GSM4626766_ATTACTCCACGAGGTA-1  | GSM4626766 | Normal |
| GSM4626766_ATTACTCCAGGAATCG-1  | GSM4626766 | Normal |
| GSM4626766_ATTACTCCATGAGCGA-1  | GSM4626766 | Normal |
| GSM4626766_ATTACTCGTATGGTTC-1  | GSM4626766 | Normal |
| GSM4626766_ATTACTCTCAGTGCAT-1  | GSM4626766 | Normal |
| GSM4626766_ATTACTCTCATTGCGA-1  | GSM4626766 | Normal |
| GSM4626766_ATTACTCTCCGCAAGC-1  | GSM4626766 | Normal |
| GSM4626766_ATTACTCTCCGGGTGT-1  | GSM4626766 | Normal |
| GSM4626766_ATTACTCTCGTTTAGG-1  | GSM4626766 | Normal |
| GSM4626766_ATTACTCTCTATGTGG-1  | GSM4626766 | Normal |
| GSM4626766_ATTACTCTCTGTCCGT-1  | GSM4626766 | Normal |
| GSM4626766_ATTATCCAGAAGGCCT-1  | GSM4626766 | Normal |
| GSM4626766_ATTATCCAGCTAGTGG-1  | GSM4626766 | Normal |
| GSM4626766_ATTATCCAGGGTTTCT-1  | GSM4626766 | Normal |
| GSM4626766_ATTATCCCAAAGGTGC-1  | GSM4626766 | Normal |
| GSM4626766_ATTATCCCATGATCCA-1  | GSM4626766 | Normal |
| GSM4626766_ATTATCCGTCTAGCGC-1  | GSM4626766 | Normal |
| GSM4626766_ATTATCCGTGAGTGAC-1  | GSM4626766 | Normal |
| GSM4626766_ATTATCCGTGCTTCTC-1  | GSM4626766 | Normal |
| GSM4626766_ATTATCCGTTATCGGT-1  | GSM4626766 | Normal |
| GSM4626766_ATTATCCTCATCATT-1   | GSM4626766 | Normal |
| GSM4626766_ATTATCCTCCGAACGC-1  | GSM4626766 | Normal |
| GSM4626766_ATTATCCTCTTACCGC-1  | GSM4626766 | Normal |
| GSM4626766_ATTCTACAGAGCTGCA-1  | GSM4626766 | Normal |
| GSM4626766_ATTCTACAGAGTACAT-1  | GSM4626766 | Normal |
| GSM4626766_ATTCTACAGATCGATA-1  | GSM4626766 | Normal |
| GSM4626766_ATTCTACAGCGGATCA-1  | GSM4626766 | Normal |
| GSM4626766_ATTCTACAGGTAAACT-1  | GSM4626766 | Normal |
| GSM4626766_ATTCTACAGTGGGATC-1  | GSM4626766 | Normal |
| GSM4626766_ATTCTACAGTTGAGAT-1  | GSM4626766 | Normal |
| GSM4626766_ATTCTACGTCTGTTGTA-1 | GSM4626766 | Normal |
| GSM4626766_ATTCTACGTGTAAGTA-1  | GSM4626766 | Normal |
| GSM4626766_ATTCTACGTGTTAAGA-1  | GSM4626766 | Normal |
| GSM4626766_ATTCTACGTTCGTGAT-1  | GSM4626766 | Normal |
| GSM4626766_ATTCTACTCAGGCGAA-1  | GSM4626766 | Normal |
| GSM4626766_ATTCTACTCGCCTGTT-1  | GSM4626766 | Normal |
| GSM4626766_ATTCTACTCGGCGTT-1   | GSM4626766 | Normal |
| GSM4626766_ATTCTACTCTGATTCT-1  | GSM4626766 | Normal |
| GSM4626766_ATTGGACAGACTTTCG-1  | GSM4626766 | Normal |

|                               |            |        |
|-------------------------------|------------|--------|
| GSM4626766_ATTGGACAGCCTCGTG-1 | GSM4626766 | Normal |
| GSM4626766_ATTGGACCAAGAAGAG-1 | GSM4626766 | Normal |
| GSM4626766_ATTGGACCAGTACACT-1 | GSM4626766 | Normal |
| GSM4626766_ATTGGACCATCATCCC-1 | GSM4626766 | Normal |
| GSM4626766_ATTGGACGTAAATACG-1 | GSM4626766 | Normal |
| GSM4626766_ATTGGACGTCCATCCT-1 | GSM4626766 | Normal |
| GSM4626766_ATTGGACGTGCAGTAG-1 | GSM4626766 | Normal |
| GSM4626766_ATTGGACGTTCGAATC-1 | GSM4626766 | Normal |
| GSM4626766_ATTGGACTCAACACCA-1 | GSM4626766 | Normal |
| GSM4626766_ATTGGTGAGACCGGAT-1 | GSM4626766 | Normal |
| GSM4626766_ATTGGTGAGATATGGT-1 | GSM4626766 | Normal |
| GSM4626766_ATTGGTGAGGACACCA-1 | GSM4626766 | Normal |
| GSM4626766_ATTGGTGAGTCGTACT-1 | GSM4626766 | Normal |
| GSM4626766_ATTGGTGAGTGTACTC-1 | GSM4626766 | Normal |
| GSM4626766_ATTGGTGCATGTCTCC-1 | GSM4626766 | Normal |
| GSM4626766_ATTGGTGGTATATCCG-1 | GSM4626766 | Normal |
| GSM4626766_ATTGGTGGTCCCTTGT-1 | GSM4626766 | Normal |
| GSM4626766_ATTGGTGGTCGTCTTC-1 | GSM4626766 | Normal |
| GSM4626766_ATTGGTGGTGAAAGAG-1 | GSM4626766 | Normal |
| GSM4626766_ATTGGTGGTTAAGAAC-1 | GSM4626766 | Normal |
| GSM4626766_ATTGGTGTCTGATCAG-1 | GSM4626766 | Normal |
| GSM4626766_ATTGGTGTCTCTGCTG-1 | GSM4626766 | Normal |
| GSM4626766_ATTGGTGTCTGGGCCA-1 | GSM4626766 | Normal |
| GSM4626766_ATTGGTGTCTTAGCCC-1 | GSM4626766 | Normal |
| GSM4626766_ATTTCTGCAATGGATA-1 | GSM4626766 | Normal |
| GSM4626766_ATTTCTGCACAGACAG-1 | GSM4626766 | Normal |
| GSM4626766_ATTTCTGCACGTCAGC-1 | GSM4626766 | Normal |
| GSM4626766_ATTTCTGCACTGAAGG-1 | GSM4626766 | Normal |
| GSM4626766_ATTTCTGGTAAAGTCA-1 | GSM4626766 | Normal |
| GSM4626766_ATTTCTGGTATATGGA-1 | GSM4626766 | Normal |
| GSM4626766_ATTTCTGGTCGCGAAA-1 | GSM4626766 | Normal |
| GSM4626766_ATTTCTGGTGTGAATA-1 | GSM4626766 | Normal |
| GSM4626766_ATTTCTGTCACGCATA-1 | GSM4626766 | Normal |
| GSM4626766_ATTTCTGTCAGGATCT-1 | GSM4626766 | Normal |
| GSM4626766_ATTTCTGTCCGCGGTA-1 | GSM4626766 | Normal |
| GSM4626766_ATTTCTGTGCGAGGTA-1 | GSM4626766 | Normal |
| GSM4626766_ATTTCTGTCTATCCTA-1 | GSM4626766 | Normal |
| GSM4626766_ATTTCTGTCTCTGCTG-1 | GSM4626766 | Normal |
| GSM4626766_CAACCAAAGACAAAGG-1 | GSM4626766 | Normal |
| GSM4626766_CAACCAAAGCCAGGAT-1 | GSM4626766 | Normal |
| GSM4626766_CAACCAAAGCCATCGC-1 | GSM4626766 | Normal |
| GSM4626766_CAACCAACAAGCCGCT-1 | GSM4626766 | Normal |
| GSM4626766_CAACCAACACCACGTG-1 | GSM4626766 | Normal |
| GSM4626766_CAACCAAGTAGCTGCC-1 | GSM4626766 | Normal |
| GSM4626766_CAACCAAGTCTTCAAG-1 | GSM4626766 | Normal |
| GSM4626766_CAACCAAGTGACGGTA-1 | GSM4626766 | Normal |
| GSM4626766_CAACCAAGTTACCGAT-1 | GSM4626766 | Normal |
| GSM4626766_CAACCAATCGGACAAG-1 | GSM4626766 | Normal |
| GSM4626766_CAACCAATCTATCGCC-1 | GSM4626766 | Normal |
| GSM4626766_CAACCAATCTGGGCCA-1 | GSM4626766 | Normal |
| GSM4626766_CAACCAATCTTGCAAG-1 | GSM4626766 | Normal |
| GSM4626766_CAACCTCAGCGTAATA-1 | GSM4626766 | Normal |
| GSM4626766_CAACCTCCAACGCACC-1 | GSM4626766 | Normal |
| GSM4626766_CAACCTCCACTCAGGC-1 | GSM4626766 | Normal |
| GSM4626766_CAACCTCCATCAGTCA-1 | GSM4626766 | Normal |
| GSM4626766_CAACCTCCATGAAGTA-1 | GSM4626766 | Normal |
| GSM4626766_CAACCTCGTGGACGAT-1 | GSM4626766 | Normal |



|                               |            |        |
|-------------------------------|------------|--------|
| GSM4626766_CAACCTCGTTTGCATG-1 | GSM4626766 | Normal |
| GSM4626766_CAACCTCTCAGGCGAA-1 | GSM4626766 | Normal |
| GSM4626766_CAACCTCTCGACCAGC-1 | GSM4626766 | Normal |
| GSM4626766_CAACCTCTCTTCGGTC-1 | GSM4626766 | Normal |
| GSM4626766_CAACTAGAGAGTGAGA-1 | GSM4626766 | Normal |
| GSM4626766_CAACTAGAGGGAAACA-1 | GSM4626766 | Normal |
| GSM4626766_CAACTAGAGTAACCCT-1 | GSM4626766 | Normal |
| GSM4626766_CAACTAGAGTAATCCC-1 | GSM4626766 | Normal |
| GSM4626766_CAACTAGAGTGAACGC-1 | GSM4626766 | Normal |
| GSM4626766_CAACTAGCAGGATCGA-1 | GSM4626766 | Normal |
| GSM4626766_CAACTAGCAGTACACT-1 | GSM4626766 | Normal |
| GSM4626766_CAACTAGGTCGAGATG-1 | GSM4626766 | Normal |
| GSM4626766_CAACTAGGTCGCGAAA-1 | GSM4626766 | Normal |
| GSM4626766_CAACTAGGTGCATCTA-1 | GSM4626766 | Normal |
| GSM4626766_CAACTAGTCAAACGGG-1 | GSM4626766 | Normal |
| GSM4626766_CAACTAGTCGAATCCA-1 | GSM4626766 | Normal |
| GSM4626766_CAACTAGTCTCCGGTT-1 | GSM4626766 | Normal |
| GSM4626766_CAAGAAAAGCGAGAAA-1 | GSM4626766 | Normal |
| GSM4626766_CAAGAAAAGGAGTACC-1 | GSM4626766 | Normal |
| GSM4626766_CAAGAAAAGGTGTGGT-1 | GSM4626766 | Normal |
| GSM4626766_CAAGAAAAGGTTCTA-1  | GSM4626766 | Normal |
| GSM4626766_CAAGAAAAGTCCAGGA-1 | GSM4626766 | Normal |
| GSM4626766_CAAGAAAAGTGTGGCA-1 | GSM4626766 | Normal |
| GSM4626766_CAAGAAACACATCCAA-1 | GSM4626766 | Normal |
| GSM4626766_CAAGAAACACGAGAGT-1 | GSM4626766 | Normal |
| GSM4626766_CAAGAAACAGCCTATA-1 | GSM4626766 | Normal |
| GSM4626766_CAAGAAAGTAGCTAAA-1 | GSM4626766 | Normal |
| GSM4626766_CAAGAAATCAGCACAT-1 | GSM4626766 | Normal |
| GSM4626766_CAAGAAATCAGTTCGA-1 | GSM4626766 | Normal |
| GSM4626766_CAAGAAATCATCGCTC-1 | GSM4626766 | Normal |
| GSM4626766_CAAGATCAGACTAGAT-1 | GSM4626766 | Normal |
| GSM4626766_CAAGATCAGGTTACCT-1 | GSM4626766 | Normal |
| GSM4626766_CAAGATCAGTGGTAGC-1 | GSM4626766 | Normal |
| GSM4626766_CAAGATCAGTTAGCGG-1 | GSM4626766 | Normal |
| GSM4626766_CAAGATCCAAAGTCAA-1 | GSM4626766 | Normal |
| GSM4626766_CAAGATCCACATTAGC-1 | GSM4626766 | Normal |
| GSM4626766_CAAGATCCACGAGGTA-1 | GSM4626766 | Normal |
| GSM4626766_CAAGATCCAGATTGCT-1 | GSM4626766 | Normal |
| GSM4626766_CAAGATCCATGCTAGT-1 | GSM4626766 | Normal |
| GSM4626766_CAAGATCGTACCCAAT-1 | GSM4626766 | Normal |
| GSM4626766_CAAGATCGTCTAGTCA-1 | GSM4626766 | Normal |
| GSM4626766_CAAGATCGTGTGGTTT-1 | GSM4626766 | Normal |
| GSM4626766_CAAGATCTCGGAAATA-1 | GSM4626766 | Normal |
| GSM4626766_CAAGATCTCTGAGTGT-1 | GSM4626766 | Normal |
| GSM4626766_CAAGATCTCTGGCGAC-1 | GSM4626766 | Normal |
| GSM4626766_CAAGGCCAGAGGTTAT-1 | GSM4626766 | Normal |
| GSM4626766_CAAGGCCAGCGCTTAT-1 | GSM4626766 | Normal |
| GSM4626766_CAAGGCCAGTGAAGTT-1 | GSM4626766 | Normal |
| GSM4626766_CAAGGCCAGTGTACCT-1 | GSM4626766 | Normal |
| GSM4626766_CAAGGCCAGTTACCCA-1 | GSM4626766 | Normal |
| GSM4626766_CAAGGCCTCATACGGT-1 | GSM4626766 | Normal |
| GSM4626766_CAAGGCCTCCGTCATC-1 | GSM4626766 | Normal |
| GSM4626766_CAAGGCCTCTTCGAGA-1 | GSM4626766 | Normal |
| GSM4626766_CAAGTTGAGAATAGGG-1 | GSM4626766 | Normal |
| GSM4626766_CAAGTTGAGGCCCTTG-1 | GSM4626766 | Normal |
| GSM4626766_CAAGTTGAGGTGATTA-1 | GSM4626766 | Normal |
| GSM4626766_CAAGTTGAGTACGTAA-1 | GSM4626766 | Normal |

|                               |            |        |
|-------------------------------|------------|--------|
| GSM4626766_CAAGTTGCAATAGCAA-1 | GSM4626766 | Normal |
| GSM4626766_CAAGTTGCACGCATCG-1 | GSM4626766 | Normal |
| GSM4626766_CAAGTTGCACGGATAG-1 | GSM4626766 | Normal |
| GSM4626766_CAAGTTGCATGCCTAA-1 | GSM4626766 | Normal |
| GSM4626766_CAAGTTGCATGGTCTA-1 | GSM4626766 | Normal |
| GSM4626766_CAAGTTGGTACAGCAG-1 | GSM4626766 | Normal |
| GSM4626766_CAAGTTGGTACCATCA-1 | GSM4626766 | Normal |
| GSM4626766_CAAGTTGGTAGAAGGA-1 | GSM4626766 | Normal |
| GSM4626766_CAAGTTGGTAGCCTAT-1 | GSM4626766 | Normal |
| GSM4626766_CAAGTTGGTTCGTGAT-1 | GSM4626766 | Normal |
| GSM4626766_CAAGTTGGTTTACTCT-1 | GSM4626766 | Normal |
| GSM4626766_CAAGTTGTCACTTATC-1 | GSM4626766 | Normal |
| GSM4626766_CACAAACAGTCGCCGT-1 | GSM4626766 | Normal |
| GSM4626766_CACAAACCAACTTGAC-1 | GSM4626766 | Normal |
| GSM4626766_CACAAACCAATACGCT-1 | GSM4626766 | Normal |
| GSM4626766_CACAAACAGTATGCT-1  | GSM4626766 | Normal |
| GSM4626766_CACAAACGTCAAAGCG-1 | GSM4626766 | Normal |
| GSM4626766_CACAAACGTGACAAAT-1 | GSM4626766 | Normal |
| GSM4626766_CACAAACGTGGTCCGT-1 | GSM4626766 | Normal |
| GSM4626766_CACAAACGTGTAATGA-1 | GSM4626766 | Normal |
| GSM4626766_CACAAACGTAAAGAC-1  | GSM4626766 | Normal |
| GSM4626766_CACAAACTCGAATCCA-1 | GSM4626766 | Normal |
| GSM4626766_CACAAACTCGTCCGTT-1 | GSM4626766 | Normal |
| GSM4626766_CACAAACTCGTTGCCT-1 | GSM4626766 | Normal |
| GSM4626766_CACACAAAGACGCTTT-1 | GSM4626766 | Normal |
| GSM4626766_CACACAAAGATACACA-1 | GSM4626766 | Normal |
| GSM4626766_CACACAAAGCTAAGAT-1 | GSM4626766 | Normal |
| GSM4626766_CACACAACACAGTCGC-1 | GSM4626766 | Normal |
| GSM4626766_CACACAAGTACCAGTT-1 | GSM4626766 | Normal |
| GSM4626766_CACACAAGTGCTCTTC-1 | GSM4626766 | Normal |
| GSM4626766_CACACAATCATGTAGC-1 | GSM4626766 | Normal |
| GSM4626766_CACACAATCTCCGGTT-1 | GSM4626766 | Normal |
| GSM4626766_CACACAATCTGGAGCC-1 | GSM4626766 | Normal |
| GSM4626766_CACACAATCTGGTATG-1 | GSM4626766 | Normal |
| GSM4626766_CACACAATCTTCATGT-1 | GSM4626766 | Normal |
| GSM4626766_CACACCTAGAAGGACA-1 | GSM4626766 | Normal |
| GSM4626766_CACACCTAGCTGAACG-1 | GSM4626766 | Normal |
| GSM4626766_CACACCTAGGACAGAA-1 | GSM4626766 | Normal |
| GSM4626766_CACACCTAGTGAAGAG-1 | GSM4626766 | Normal |
| GSM4626766_CACACCTCAAGTAATG-1 | GSM4626766 | Normal |
| GSM4626766_CACACCTCAATCCGAT-1 | GSM4626766 | Normal |
| GSM4626766_CACACCTCACACGTT-1  | GSM4626766 | Normal |
| GSM4626766_CACACCTCATCCAACA-1 | GSM4626766 | Normal |
| GSM4626766_CACACCTCATTTGCTT-1 | GSM4626766 | Normal |
| GSM4626766_CACACCTGTAAGGGAA-1 | GSM4626766 | Normal |
| GSM4626766_CACACCTGTAGCTCCG-1 | GSM4626766 | Normal |
| GSM4626766_CACACCTGTCCAATA-1  | GSM4626766 | Normal |
| GSM4626766_CACACCTGTGTAACGG-1 | GSM4626766 | Normal |
| GSM4626766_CACACCTGTTCGTCTC-1 | GSM4626766 | Normal |
| GSM4626766_CACACCTGTTCTCATT-1 | GSM4626766 | Normal |
| GSM4626766_CACACCTTCACTTATC-1 | GSM4626766 | Normal |
| GSM4626766_CACACCTTCCCATTG-1  | GSM4626766 | Normal |
| GSM4626766_CACACCTTCTCTAAGG-1 | GSM4626766 | Normal |
| GSM4626766_CACACTCAGATCCGAG-1 | GSM4626766 | Normal |
| GSM4626766_CACACTCCAATAGCGG-1 | GSM4626766 | Normal |
| GSM4626766_CACACTCCAGGGATTG-1 | GSM4626766 | Normal |
| GSM4626766_CACACTCCATGGTAGG-1 | GSM4626766 | Normal |

|                                |            |        |
|--------------------------------|------------|--------|
| GSM4626766_CACACTCGTACATCCA-1  | GSM4626766 | Normal |
| GSM4626766_CACACTCGTATATGAG-1  | GSM4626766 | Normal |
| GSM4626766_CACACTCGTCAGTGA-1   | GSM4626766 | Normal |
| GSM4626766_CACACTCGTCTCGTTC-1  | GSM4626766 | Normal |
| GSM4626766_CACACTCGTGAAAGA-1   | GSM4626766 | Normal |
| GSM4626766_CACACTCGTTCAACCA-1  | GSM4626766 | Normal |
| GSM4626766_CACACTCTCAACACCA-1  | GSM4626766 | Normal |
| GSM4626766_CACACTCTCATCGATG-1  | GSM4626766 | Normal |
| GSM4626766_CACACTCTCCTGCAGG-1  | GSM4626766 | Normal |
| GSM4626766_CACACTCTCGGTTAAC-1  | GSM4626766 | Normal |
| GSM4626766_CACACTCTCTACCAGA-1  | GSM4626766 | Normal |
| GSM4626766_CACACTCTCTCCAGGG-1  | GSM4626766 | Normal |
| GSM4626766_CACAGGCAGCCTTGAT-1  | GSM4626766 | Normal |
| GSM4626766_CACAGGCAGCGAAGGG-1  | GSM4626766 | Normal |
| GSM4626766_CACAGGCAGGCGACAT-1  | GSM4626766 | Normal |
| GSM4626766_CACAGGCAGGTAAACT-1  | GSM4626766 | Normal |
| GSM4626766_CACAGGCCAAGCGTAG-1  | GSM4626766 | Normal |
| GSM4626766_CACAGGCCACGGTAGA-1  | GSM4626766 | Normal |
| GSM4626766_CACAGGCCATCCGCGA-1  | GSM4626766 | Normal |
| GSM4626766_CACAGGCCATCGATGT-1  | GSM4626766 | Normal |
| GSM4626766_CACAGGCGTCACTGGC-1  | GSM4626766 | Normal |
| GSM4626766_CACAGGCGTCGGGTCT-1  | GSM4626766 | Normal |
| GSM4626766_CACAGGCGTCTAGAGG-1  | GSM4626766 | Normal |
| GSM4626766_CACAGGCGTGATGCC-1   | GSM4626766 | Normal |
| GSM4626766_CACAGGCGTGGTGTAG-1  | GSM4626766 | Normal |
| GSM4626766_CACAGGCGTGTGAGG-1   | GSM4626766 | Normal |
| GSM4626766_CACAGGCGTTCGAATC-1  | GSM4626766 | Normal |
| GSM4626766_CACAGGCTCGCCAAAT-1  | GSM4626766 | Normal |
| GSM4626766_CACAGGCTCTTGTGTTG-1 | GSM4626766 | Normal |
| GSM4626766_CACAGTAAGACTACAA-1  | GSM4626766 | Normal |
| GSM4626766_CACAGTAAGACTGGGT-1  | GSM4626766 | Normal |
| GSM4626766_CACAGTAAGAGTCTGG-1  | GSM4626766 | Normal |
| GSM4626766_CACAGTAAGCTTATCG-1  | GSM4626766 | Normal |
| GSM4626766_CACAGTAAGGACCACA-1  | GSM4626766 | Normal |
| GSM4626766_CACAGTAAGGCAAAGA-1  | GSM4626766 | Normal |
| GSM4626766_CACAGTAAGGTGCTAG-1  | GSM4626766 | Normal |
| GSM4626766_CACAGTACAAACGTGG-1  | GSM4626766 | Normal |
| GSM4626766_CACAGTACAATCAGAA-1  | GSM4626766 | Normal |
| GSM4626766_CACAGTACACTGTGTA-1  | GSM4626766 | Normal |
| GSM4626766_CACAGTACATCCACT-1   | GSM4626766 | Normal |
| GSM4626766_CACAGTAGTCGAATCT-1  | GSM4626766 | Normal |
| GSM4626766_CACAGTAGTCTCTTTA-1  | GSM4626766 | Normal |
| GSM4626766_CACAGTAGTGGCAAAC-1  | GSM4626766 | Normal |
| GSM4626766_CACAGTAGTGTTGGT-1   | GSM4626766 | Normal |
| GSM4626766_CACAGTAGTTATGCGT-1  | GSM4626766 | Normal |
| GSM4626766_CACAGTATCAGAGGTG-1  | GSM4626766 | Normal |
| GSM4626766_CACAGTATCCGCATAA-1  | GSM4626766 | Normal |
| GSM4626766_CACAGTATCGCGCCAA-1  | GSM4626766 | Normal |
| GSM4626766_CACATAGCAGATCTGT-1  | GSM4626766 | Normal |
| GSM4626766_CACATAGCATACTACG-1  | GSM4626766 | Normal |
| GSM4626766_CACATAGGTAGCAAAT-1  | GSM4626766 | Normal |
| GSM4626766_CACATAGGTCCTAGCG-1  | GSM4626766 | Normal |
| GSM4626766_CACATAGGTCGCATCG-1  | GSM4626766 | Normal |
| GSM4626766_CACATAGGTTAAGACA-1  | GSM4626766 | Normal |
| GSM4626766_CACATAGTCCCATTTA-1  | GSM4626766 | Normal |
| GSM4626766_CACATAGTCTTCGGTC-1  | GSM4626766 | Normal |
| GSM4626766_CACATTTAGACTAAGT-1  | GSM4626766 | Normal |

|                                |            |        |
|--------------------------------|------------|--------|
| GSM4626766_CACATTTAGAGGTACC-1  | GSM4626766 | Normal |
| GSM4626766_CACATTTAGCACGCCT-1  | GSM4626766 | Normal |
| GSM4626766_CACATTTAGTGAAGAG-1  | GSM4626766 | Normal |
| GSM4626766_CACATTTCAACACCTA-1  | GSM4626766 | Normal |
| GSM4626766_CACATTTCAAGGTGTG-1  | GSM4626766 | Normal |
| GSM4626766_CACATTTTCATGCGCAC-1 | GSM4626766 | Normal |
| GSM4626766_CACATTTTCATTCACTT-1 | GSM4626766 | Normal |
| GSM4626766_CACATTTTCATTGAGCT-1 | GSM4626766 | Normal |
| GSM4626766_CACATTTGTCCAGTAT-1  | GSM4626766 | Normal |
| GSM4626766_CACATTTGTCTCTCGT-1  | GSM4626766 | Normal |
| GSM4626766_CACATTTGTTACGGC-1   | GSM4626766 | Normal |
| GSM4626766_CACATTTTCTGAAAGA-1  | GSM4626766 | Normal |
| GSM4626766_CACATTTTCTTAGAGC-1  | GSM4626766 | Normal |
| GSM4626766_CACCACTAGGGAACGG-1  | GSM4626766 | Normal |
| GSM4626766_CACCACTAGTGCAAGC-1  | GSM4626766 | Normal |
| GSM4626766_CACCACTCAAAGGTGC-1  | GSM4626766 | Normal |
| GSM4626766_CACCACTCACTCAGGC-1  | GSM4626766 | Normal |
| GSM4626766_CACCACTCAGTGACAG-1  | GSM4626766 | Normal |
| GSM4626766_CACCACTCAGTTCCT-1   | GSM4626766 | Normal |
| GSM4626766_CACCACTGTAAGAGAG-1  | GSM4626766 | Normal |
| GSM4626766_CACCACTGTACAGCAG-1  | GSM4626766 | Normal |
| GSM4626766_CACCACTGTCATACTG-1  | GSM4626766 | Normal |
| GSM4626766_CACCACTGTTGTTTGG-1  | GSM4626766 | Normal |
| GSM4626766_CACCACTGTTTGTGTG-1  | GSM4626766 | Normal |
| GSM4626766_CACCAGGAGACTAGAT-1  | GSM4626766 | Normal |
| GSM4626766_CACCAGGAGGAGCGAG-1  | GSM4626766 | Normal |
| GSM4626766_CACCAGGAGGAGTTGC-1  | GSM4626766 | Normal |
| GSM4626766_CACCAGGAGGCAGTCA-1  | GSM4626766 | Normal |
| GSM4626766_CACCAGGAGGTGACCA-1  | GSM4626766 | Normal |
| GSM4626766_CACCAGGAGTAGATGT-1  | GSM4626766 | Normal |
| GSM4626766_CACCAGGCAACACCTA-1  | GSM4626766 | Normal |
| GSM4626766_CACCAGGCAATCCGAT-1  | GSM4626766 | Normal |
| GSM4626766_CACCAGGCAGGGATTG-1  | GSM4626766 | Normal |
| GSM4626766_CACCAGGGTCATATGC-1  | GSM4626766 | Normal |
| GSM4626766_CACCAGGGTCCGTCAG-1  | GSM4626766 | Normal |
| GSM4626766_CACCAGGGTGACAAAT-1  | GSM4626766 | Normal |
| GSM4626766_CACCAGGGTGACGGTA-1  | GSM4626766 | Normal |
| GSM4626766_CACCAGGGTTGTGGCC-1  | GSM4626766 | Normal |
| GSM4626766_CACCAGGGTTGTTTGG-1  | GSM4626766 | Normal |
| GSM4626766_CACCTTGAGACTCGGA-1  | GSM4626766 | Normal |
| GSM4626766_CACCTTGAGATATGCA-1  | GSM4626766 | Normal |
| GSM4626766_CACCTTGAGGACATTA-1  | GSM4626766 | Normal |
| GSM4626766_CACCTTGAGGCGTACA-1  | GSM4626766 | Normal |
| GSM4626766_CACCTTGAGGTGCACA-1  | GSM4626766 | Normal |
| GSM4626766_CACCTTGAGTGCAAGC-1  | GSM4626766 | Normal |
| GSM4626766_CACCTTGCAAACCTAC-1  | GSM4626766 | Normal |
| GSM4626766_CACCTTGCAACACCCG-1  | GSM4626766 | Normal |
| GSM4626766_CACCTTGCAACGAATT-1  | GSM4626766 | Normal |
| GSM4626766_CACCTTGCAAGTCCTTC-1 | GSM4626766 | Normal |
| GSM4626766_CACCTTGGTAAGGGAA-1  | GSM4626766 | Normal |
| GSM4626766_CACCTTGGTAGCCTAT-1  | GSM4626766 | Normal |
| GSM4626766_CACCTTGGTATCTGCA-1  | GSM4626766 | Normal |
| GSM4626766_CACCTTGGTCCTAGCG-1  | GSM4626766 | Normal |
| GSM4626766_CACCTTGGTTCGTGAT-1  | GSM4626766 | Normal |
| GSM4626766_CACCTTGGTTGCCTCT-1  | GSM4626766 | Normal |
| GSM4626766_CACCTTGTCTTAGAGC-1  | GSM4626766 | Normal |
| GSM4626766_CACTCCAAGAACAAC-1   | GSM4626766 | Normal |

|                                |            |        |
|--------------------------------|------------|--------|
| GSM4626766_CACTCCAAGCAAATCA-1  | GSM4626766 | Normal |
| GSM4626766_CACTCCAAGGGCTTCC-1  | GSM4626766 | Normal |
| GSM4626766_CACTCCAAGTAGATGT-1  | GSM4626766 | Normal |
| GSM4626766_CACTCCACAAGGTTCT-1  | GSM4626766 | Normal |
| GSM4626766_CACTCCACAGACAAAT-1  | GSM4626766 | Normal |
| GSM4626766_CACTCCACATGCTAGT-1  | GSM4626766 | Normal |
| GSM4626766_CACTCCACATTCTCAT-1  | GSM4626766 | Normal |
| GSM4626766_CACTCCACATTGAGCT-1  | GSM4626766 | Normal |
| GSM4626766_CACTCCAGTAAGGGCT-1  | GSM4626766 | Normal |
| GSM4626766_CACTCCAGTATATCCG-1  | GSM4626766 | Normal |
| GSM4626766_CACTCCAGTGGCGAAT-1  | GSM4626766 | Normal |
| GSM4626766_CACTCCAGTTGTACAC-1  | GSM4626766 | Normal |
| GSM4626766_CACTCCATCAACCATG-1  | GSM4626766 | Normal |
| GSM4626766_CACTCCATCAGCTCGG-1  | GSM4626766 | Normal |
| GSM4626766_CACTCCATCGTTTATC-1  | GSM4626766 | Normal |
| GSM4626766_CACTCCATCTATGTGG-1  | GSM4626766 | Normal |
| GSM4626766_CACTCCATCTCCAGGG-1  | GSM4626766 | Normal |
| GSM4626766_CACTCCATCTCTGCTG-1  | GSM4626766 | Normal |
| GSM4626766_CAGAATCAGTGGTCCC-1  | GSM4626766 | Normal |
| GSM4626766_CAGAATCCAATAACGA-1  | GSM4626766 | Normal |
| GSM4626766_CAGAATCCACGAAGCA-1  | GSM4626766 | Normal |
| GSM4626766_CAGAATCTCAACGCTA-1  | GSM4626766 | Normal |
| GSM4626766_CAGAATCTCCACGTGG-1  | GSM4626766 | Normal |
| GSM4626766_CAGAATCTCTAACCGA-1  | GSM4626766 | Normal |
| GSM4626766_CAGAGAGAGAACTGTA-1  | GSM4626766 | Normal |
| GSM4626766_CAGAGAGAGCCGGTAA-1  | GSM4626766 | Normal |
| GSM4626766_CAGAGAGAGTCCGGTC-1  | GSM4626766 | Normal |
| GSM4626766_CAGAGAGCAACAACCT-1  | GSM4626766 | Normal |
| GSM4626766_CAGAGAGCAATCAGAA-1  | GSM4626766 | Normal |
| GSM4626766_CAGAGAGCACGAGAGT-1  | GSM4626766 | Normal |
| GSM4626766_CAGAGAGCAGCCTTTC-1  | GSM4626766 | Normal |
| GSM4626766_CAGAGAGCATAGACTC-1  | GSM4626766 | Normal |
| GSM4626766_CAGAGAGGTCGGCATC-1  | GSM4626766 | Normal |
| GSM4626766_CAGAGAGGTTACCAGT-1  | GSM4626766 | Normal |
| GSM4626766_CAGAGAGGTTGTACAC-1  | GSM4626766 | Normal |
| GSM4626766_CAGAGAGTCAAACCGT-1  | GSM4626766 | Normal |
| GSM4626766_CAGAGAGTCACCCGAG-1  | GSM4626766 | Normal |
| GSM4626766_CAGAGAGTCCTTGCCA-1  | GSM4626766 | Normal |
| GSM4626766_CAGAGAGTCGAGCCCA-1  | GSM4626766 | Normal |
| GSM4626766_CAGAGAGTCTAACGGT-1  | GSM4626766 | Normal |
| GSM4626766_CAGATCAAGAGCCCAA-1  | GSM4626766 | Normal |
| GSM4626766_CAGATCAAGCACGCCT-1  | GSM4626766 | Normal |
| GSM4626766_CAGATCAAGCTGATAA-1  | GSM4626766 | Normal |
| GSM4626766_CAGATCACACGGCTAC-1  | GSM4626766 | Normal |
| GSM4626766_CAGATCACAGCAGTTT-1  | GSM4626766 | Normal |
| GSM4626766_CAGATCACAGCCTATA-1  | GSM4626766 | Normal |
| GSM4626766_CAGATCACAGTCAGAG-1  | GSM4626766 | Normal |
| GSM4626766_CAGATCAGTCAAACCTC-1 | GSM4626766 | Normal |
| GSM4626766_CAGATCAGTCCGACGT-1  | GSM4626766 | Normal |
| GSM4626766_CAGATCAGTGTGCGTC-1  | GSM4626766 | Normal |
| GSM4626766_CAGATCAGTTAAAGTG-1  | GSM4626766 | Normal |
| GSM4626766_CAGATCATCACAGGCC-1  | GSM4626766 | Normal |
| GSM4626766_CAGATCATCGCCAGCA-1  | GSM4626766 | Normal |
| GSM4626766_CAGATCATCTACTTAC-1  | GSM4626766 | Normal |
| GSM4626766_CAGATCATCTCTAGGA-1  | GSM4626766 | Normal |
| GSM4626766_CAGATCATCTGCTGTC-1  | GSM4626766 | Normal |
| GSM4626766_CAGCAGCAGTTGAGTA-1  | GSM4626766 | Normal |

|                               |            |        |
|-------------------------------|------------|--------|
| GSM4626766_CAGCAGCGTTCCTCCA-1 | GSM4626766 | Normal |
| GSM4626766_CAGCAGCTCAAAGACA-1 | GSM4626766 | Normal |
| GSM4626766_CAGCAGCTCCACGTGG-1 | GSM4626766 | Normal |
| GSM4626766_CAGCAGCTCGTTGCCT-1 | GSM4626766 | Normal |
| GSM4626766_CAGCATAAGAAGGCCT-1 | GSM4626766 | Normal |
| GSM4626766_CAGCATAAGCGATTCT-1 | GSM4626766 | Normal |
| GSM4626766_CAGCATAAGCTACCTA-1 | GSM4626766 | Normal |
| GSM4626766_CAGCATACAGTAGAGC-1 | GSM4626766 | Normal |
| GSM4626766_CAGCATAGTACAGACG-1 | GSM4626766 | Normal |
| GSM4626766_CAGCATAGTATATGAG-1 | GSM4626766 | Normal |
| GSM4626766_CAGCATAGTCTAGCGC-1 | GSM4626766 | Normal |
| GSM4626766_CAGCATAGTGCCTGTG-1 | GSM4626766 | Normal |
| GSM4626766_CAGCATAGTGTTTGGT-1 | GSM4626766 | Normal |
| GSM4626766_CAGCATAGTTGCCTCT-1 | GSM4626766 | Normal |
| GSM4626766_CAGCATATCCACGTTT-1 | GSM4626766 | Normal |
| GSM4626766_CAGCATATCGGAAATA-1 | GSM4626766 | Normal |
| GSM4626766_CAGCCGAAGAAGATTC-1 | GSM4626766 | Normal |
| GSM4626766_CAGCCGAAGAGTTGGC-1 | GSM4626766 | Normal |
| GSM4626766_CAGCCGAAGCCGTCGT-1 | GSM4626766 | Normal |
| GSM4626766_CAGCCGAAGGATGCGT-1 | GSM4626766 | Normal |
| GSM4626766_CAGCCGAAGTCTCCTC-1 | GSM4626766 | Normal |
| GSM4626766_CAGCCGAGTTATCCGA-1 | GSM4626766 | Normal |
| GSM4626766_CAGCCGAGTTCAACCA-1 | GSM4626766 | Normal |
| GSM4626766_CAGCGACAGAACTGTA-1 | GSM4626766 | Normal |
| GSM4626766_CAGCGACAGAATGTGT-1 | GSM4626766 | Normal |
| GSM4626766_CAGCGACAGAGACTTA-1 | GSM4626766 | Normal |
| GSM4626766_CAGCGACAGCTAAGAT-1 | GSM4626766 | Normal |
| GSM4626766_CAGCGACAGTATGACA-1 | GSM4626766 | Normal |
| GSM4626766_CAGCGACGTAAGGATT-1 | GSM4626766 | Normal |
| GSM4626766_CAGCGACGTACCGGCT-1 | GSM4626766 | Normal |
| GSM4626766_CAGCGACGTTACGCGC-1 | GSM4626766 | Normal |
| GSM4626766_CAGCGACTCATACGGT-1 | GSM4626766 | Normal |
| GSM4626766_CAGCGACTCCTGTAGA-1 | GSM4626766 | Normal |
| GSM4626766_CAGCGACTCCTTTACA-1 | GSM4626766 | Normal |
| GSM4626766_CAGCGACTCTCTAGGA-1 | GSM4626766 | Normal |
| GSM4626766_CAGCTAAAGACAAAGG-1 | GSM4626766 | Normal |
| GSM4626766_CAGCTAAAGACAATAC-1 | GSM4626766 | Normal |
| GSM4626766_CAGCTAAAGAGTGACC-1 | GSM4626766 | Normal |
| GSM4626766_CAGCTAAAGGCACATG-1 | GSM4626766 | Normal |
| GSM4626766_CAGCTAAAGGCCCGTT-1 | GSM4626766 | Normal |
| GSM4626766_CAGCTAACACCAGATT-1 | GSM4626766 | Normal |
| GSM4626766_CAGCTAACACCGTTGG-1 | GSM4626766 | Normal |
| GSM4626766_CAGCTAACAGCCAATT-1 | GSM4626766 | Normal |
| GSM4626766_CAGCTAACAGCTGTTA-1 | GSM4626766 | Normal |
| GSM4626766_CAGCTAACATGGTAGG-1 | GSM4626766 | Normal |
| GSM4626766_CAGCTAAGTAGGACAC-1 | GSM4626766 | Normal |
| GSM4626766_CAGCTAAGTATTCGTG-1 | GSM4626766 | Normal |
| GSM4626766_CAGCTAAGTTGAGTTC-1 | GSM4626766 | Normal |
| GSM4626766_CAGCTAATCAACGCTA-1 | GSM4626766 | Normal |
| GSM4626766_CAGCTAATCACTCTTA-1 | GSM4626766 | Normal |
| GSM4626766_CAGCTAATCCGCGGTA-1 | GSM4626766 | Normal |
| GSM4626766_CAGCTAATCCGTACAA-1 | GSM4626766 | Normal |
| GSM4626766_CAGCTAATCCTTGACC-1 | GSM4626766 | Normal |
| GSM4626766_CAGCTAATCTGCTTGC-1 | GSM4626766 | Normal |
| GSM4626766_CAGCTGGAGTACGACG-1 | GSM4626766 | Normal |
| GSM4626766_CAGCTGGCAAGCTGGA-1 | GSM4626766 | Normal |
| GSM4626766_CAGCTGGCAGGGAGAG-1 | GSM4626766 | Normal |

|                                 |            |        |
|---------------------------------|------------|--------|
| GSM4626766_CAGCTGGCATTGGCGC-1   | GSM4626766 | Normal |
| GSM4626766_CAGCTGGGTGCGACTAT-1  | GSM4626766 | Normal |
| GSM4626766_CAGCTGGGTGATGTGG-1   | GSM4626766 | Normal |
| GSM4626766_CAGCTGGGTAAAGACA-1   | GSM4626766 | Normal |
| GSM4626766_CAGCTGGGTGAACTC-1    | GSM4626766 | Normal |
| GSM4626766_CAGCTGGTCCGCATCT-1   | GSM4626766 | Normal |
| GSM4626766_CAGCTGGTCCTGCTTG-1   | GSM4626766 | Normal |
| GSM4626766_CAGCTGGTCTGAGGGA-1   | GSM4626766 | Normal |
| GSM4626766_CAGGTGCAGAGTCTGG-1   | GSM4626766 | Normal |
| GSM4626766_CAGGTGCAGCGCTCCA-1   | GSM4626766 | Normal |
| GSM4626766_CAGGTGCAGGTGCTTT-1   | GSM4626766 | Normal |
| GSM4626766_CAGGTGCCAAGCGTAG-1   | GSM4626766 | Normal |
| GSM4626766_CAGGTGCCAAGCTGTT-1   | GSM4626766 | Normal |
| GSM4626766_CAGGTGCCACCGAATT-1   | GSM4626766 | Normal |
| GSM4626766_CAGGTGCCAGGGAGAG-1   | GSM4626766 | Normal |
| GSM4626766_CAGGTGCCATCGGACC-1   | GSM4626766 | Normal |
| GSM4626766_CAGGTGCCATGGTCAT-1   | GSM4626766 | Normal |
| GSM4626766_CAGGTGCCATTCACTT-1   | GSM4626766 | Normal |
| GSM4626766_CAGGTGCGTAGCTCCG-1   | GSM4626766 | Normal |
| GSM4626766_CAGGTGCGTCTCTTTA-1   | GSM4626766 | Normal |
| GSM4626766_CAGGTGCTCTAGAGTC-1   | GSM4626766 | Normal |
| GSM4626766_CAGTAACAGAGCTATA-1   | GSM4626766 | Normal |
| GSM4626766_CAGTAACAGAGTACAT-1   | GSM4626766 | Normal |
| GSM4626766_CAGTAACAGCCTTGAT-1   | GSM4626766 | Normal |
| GSM4626766_CAGTAACAGTCCTCCT-1   | GSM4626766 | Normal |
| GSM4626766_CAGTAACCAAGCCGCT-1   | GSM4626766 | Normal |
| GSM4626766_CAGTAACCAAGTTCTG-1   | GSM4626766 | Normal |
| GSM4626766_CAGTAACCAACCG-1      | GSM4626766 | Normal |
| GSM4626766_CAGTAACGTCAGGACA-1   | GSM4626766 | Normal |
| GSM4626766_CAGTAACGTCCGAACC-1   | GSM4626766 | Normal |
| GSM4626766_CAGTAACGTTCGCTAA-1   | GSM4626766 | Normal |
| GSM4626766_CAGTAACGTTGAGTTC-1   | GSM4626766 | Normal |
| GSM4626766_CAGTAACGTTTCCACC-1   | GSM4626766 | Normal |
| GSM4626766_CAGTAACACTCACAGTAC-1 | GSM4626766 | Normal |
| GSM4626766_CAGTAACACTCATCACCC-1 | GSM4626766 | Normal |
| GSM4626766_CAGTAACACTCCGTTGTC-1 | GSM4626766 | Normal |
| GSM4626766_CAGTAACACTCTGTGTCG-1 | GSM4626766 | Normal |
| GSM4626766_CAGTAACACTCTGCGTAA-1 | GSM4626766 | Normal |
| GSM4626766_CAGTCCTAGATGCGAC-1   | GSM4626766 | Normal |
| GSM4626766_CAGTCCTAGCAGCCTC-1   | GSM4626766 | Normal |
| GSM4626766_CAGTCCTAGCGCTCCA-1   | GSM4626766 | Normal |
| GSM4626766_CAGTCCTCAATGACCT-1   | GSM4626766 | Normal |
| GSM4626766_CAGTCCTCACATGTGT-1   | GSM4626766 | Normal |
| GSM4626766_CAGTCCTCACTATCTT-1   | GSM4626766 | Normal |
| GSM4626766_CAGTCCTCATGCAACT-1   | GSM4626766 | Normal |
| GSM4626766_CAGTCCTGTAGGCTGA-1   | GSM4626766 | Normal |
| GSM4626766_CAGTCCTGTCCATGAT-1   | GSM4626766 | Normal |
| GSM4626766_CAGTCCTGTCCGGTCT-1   | GSM4626766 | Normal |
| GSM4626766_CAGTCCTGTCTAGAGG-1   | GSM4626766 | Normal |
| GSM4626766_CAGTCCTTCTCCTAG-1    | GSM4626766 | Normal |
| GSM4626766_CAGTCCTTCTTGTATC-1   | GSM4626766 | Normal |
| GSM4626766_CATATGGCAATCAGAA-1   | GSM4626766 | Normal |
| GSM4626766_CATATGGCACAAACGTT-1  | GSM4626766 | Normal |
| GSM4626766_CATATGGCAGCTGCTG-1   | GSM4626766 | Normal |
| GSM4626766_CATATGGCAGCTGTTA-1   | GSM4626766 | Normal |
| GSM4626766_CATATGGGTCGAACAG-1   | GSM4626766 | Normal |
| GSM4626766_CATATGGTCCAGTGCAT-1  | GSM4626766 | Normal |

|                                 |            |        |
|---------------------------------|------------|--------|
| GSM4626766_CATATGGTCCACG TTC-1  | GSM4626766 | Normal |
| GSM4626766_CATATGGTCCTCTAGC-1   | GSM4626766 | Normal |
| GSM4626766_CATATGGTCTCGCATC-1   | GSM4626766 | Normal |
| GSM4626766_CATATTCAGACAGACC-1   | GSM4626766 | Normal |
| GSM4626766_CATATTCAGATGTTAG-1   | GSM4626766 | Normal |
| GSM4626766_CATATTCAGCCCAGCT-1   | GSM4626766 | Normal |
| GSM4626766_CATATTCAGGGTTCCC-1   | GSM4626766 | Normal |
| GSM4626766_CATATTCAGTGTTGAA-1   | GSM4626766 | Normal |
| GSM4626766_CATATTC CAATCTACG-1  | GSM4626766 | Normal |
| GSM4626766_CATATTC CACA ACTGT-1 | GSM4626766 | Normal |
| GSM4626766_CATATTC CATT CGACA-1 | GSM4626766 | Normal |
| GSM4626766_CATATTC GTAAAGGAG-1  | GSM4626766 | Normal |
| GSM4626766_CATATTC G TACTTCTT-1 | GSM4626766 | Normal |
| GSM4626766_CATATTC G TATTACCG-1 | GSM4626766 | Normal |
| GSM4626766_CATATTC TCCG TAGTA-1 | GSM4626766 | Normal |
| GSM4626766_CATATTC TCGAGCCCA-1  | GSM4626766 | Normal |
| GSM4626766_CATATTC TCTTGCAAG-1  | GSM4626766 | Normal |
| GSM4626766_CATCAAGAGCTGCGAA-1   | GSM4626766 | Normal |
| GSM4626766_CATCAAGAGGCTCTTA-1   | GSM4626766 | Normal |
| GSM4626766_CATCAAGCAGGGAGAG-1   | GSM4626766 | Normal |
| GSM4626766_CATCAAGCATAGACTC-1   | GSM4626766 | Normal |
| GSM4626766_CATCAAGGTACCTACA-1   | GSM4626766 | Normal |
| GSM4626766_CATCAAGGTATAAACG-1   | GSM4626766 | Normal |
| GSM4626766_CATCAAGGTCCAGTAT-1   | GSM4626766 | Normal |
| GSM4626766_CATCAAGTCACAAACC-1   | GSM4626766 | Normal |
| GSM4626766_CATCAAGTCAGCTTAG-1   | GSM4626766 | Normal |
| GSM4626766_CATCAAGTCCTC ATTA-1  | GSM4626766 | Normal |
| GSM4626766_CATCAAGTCGTAGGAG-1   | GSM4626766 | Normal |
| GSM4626766_CATCAGAAGATGCCAG-1   | GSM4626766 | Normal |
| GSM4626766_CATCAGAGTAGCTGCC-1   | GSM4626766 | Normal |
| GSM4626766_CATCAGATCACTCTTA-1   | GSM4626766 | Normal |
| GSM4626766_CATCAGATCAGCTCTC-1   | GSM4626766 | Normal |
| GSM4626766_CATCAGATCCAGAAGG-1   | GSM4626766 | Normal |
| GSM4626766_CATCAGATCCCTTGCA-1   | GSM4626766 | Normal |
| GSM4626766_CATCAGATCCGTAGGC-1   | GSM4626766 | Normal |
| GSM4626766_CATCAGATCGACGGAA-1   | GSM4626766 | Normal |
| GSM4626766_CATCCACCAGTATCTG-1   | GSM4626766 | Normal |
| GSM4626766_CATCCACGTACGCACC-1   | GSM4626766 | Normal |
| GSM4626766_CATCCACGTCAAAGCG-1   | GSM4626766 | Normal |
| GSM4626766_CATCCACGT CAGTGGA-1  | GSM4626766 | Normal |
| GSM4626766_CATCCACGTGCCTGCA-1   | GSM4626766 | Normal |
| GSM4626766_CATCCACGTTGTCGCG-1   | GSM4626766 | Normal |
| GSM4626766_CATCCACTCCGTAGGC-1   | GSM4626766 | Normal |
| GSM4626766_CATCCACTCCTGCCAT-1   | GSM4626766 | Normal |
| GSM4626766_CATCCACTCGAACGGA-1   | GSM4626766 | Normal |
| GSM4626766_CATCCACTCGAACTGT-1   | GSM4626766 | Normal |
| GSM4626766_CATCCACTCGGAAACG-1   | GSM4626766 | Normal |
| GSM4626766_CATCCACTCTTAACCT-1   | GSM4626766 | Normal |
| GSM4626766_CATCGAAAGACTGGGT-1   | GSM4626766 | Normal |
| GSM4626766_CATCGAAAGATCCCAT-1   | GSM4626766 | Normal |
| GSM4626766_CATCGAAAGCGCTCCA-1   | GSM4626766 | Normal |
| GSM4626766_CATCGAACAAAGTCTGT-1  | GSM4626766 | Normal |
| GSM4626766_CATCGAACAGTTCCT-1    | GSM4626766 | Normal |
| GSM4626766_CATCGAACATT CCTCG-1  | GSM4626766 | Normal |
| GSM4626766_CATCGAAGTGAGTATA-1   | GSM4626766 | Normal |
| GSM4626766_CATCGAATCAGATAAG-1   | GSM4626766 | Normal |
| GSM4626766_CATCGAATCATCGGAT-1   | GSM4626766 | Normal |



|                                |            |        |
|--------------------------------|------------|--------|
| GSM4626766_CATCGAATCCGAGCCA-1  | GSM4626766 | Normal |
| GSM4626766_CATCGGGAGCGTAATA-1  | GSM4626766 | Normal |
| GSM4626766_CATCGGGGTCTGGCT-1   | GSM4626766 | Normal |
| GSM4626766_CATCGGGTCTTGCCA-1   | GSM4626766 | Normal |
| GSM4626766_CATCGGGTCTGAACTGT-1 | GSM4626766 | Normal |
| GSM4626766_CATGACAAGAGACGAA-1  | GSM4626766 | Normal |
| GSM4626766_CATGACAAGATGTTAG-1  | GSM4626766 | Normal |
| GSM4626766_CATGACAAGCTGGAAC-1  | GSM4626766 | Normal |
| GSM4626766_CATGACAAGTCAATAG-1  | GSM4626766 | Normal |
| GSM4626766_CATGACACAAGGCTCC-1  | GSM4626766 | Normal |
| GSM4626766_CATGACACAAGGTGTG-1  | GSM4626766 | Normal |
| GSM4626766_CATGACACAATAGAGT-1  | GSM4626766 | Normal |
| GSM4626766_CATGACACACAGACTT-1  | GSM4626766 | Normal |
| GSM4626766_CATGACACACGAGAGT-1  | GSM4626766 | Normal |
| GSM4626766_CATGACACAGGTGGAT-1  | GSM4626766 | Normal |
| GSM4626766_CATGACAGTCAATACC-1  | GSM4626766 | Normal |
| GSM4626766_CATGACAGTCTGGATCC-1 | GSM4626766 | Normal |
| GSM4626766_CATGACAGTGAAGGCT-1  | GSM4626766 | Normal |
| GSM4626766_CATGACAGTGTCTTT-1   | GSM4626766 | Normal |
| GSM4626766_CATGACAGTTTGTGG-1   | GSM4626766 | Normal |
| GSM4626766_CATGACATCATCACCC-1  | GSM4626766 | Normal |
| GSM4626766_CATGACATCCTCCTAG-1  | GSM4626766 | Normal |
| GSM4626766_CATGACATCGGAATCT-1  | GSM4626766 | Normal |
| GSM4626766_CATGCCTCAAGCGTAG-1  | GSM4626766 | Normal |
| GSM4626766_CATGCCTCAGCGTCCA-1  | GSM4626766 | Normal |
| GSM4626766_CATGCCTGTCCACCTAA-1 | GSM4626766 | Normal |
| GSM4626766_CATGCCTGTCCATCCT-1  | GSM4626766 | Normal |
| GSM4626766_CATGCCTTACATGCA-1   | GSM4626766 | Normal |
| GSM4626766_CATGCCTTCTCTAGC-1   | GSM4626766 | Normal |
| GSM4626766_CATGCCTTCTACGAGT-1  | GSM4626766 | Normal |
| GSM4626766_CATGCCTTCTCCCTGA-1  | GSM4626766 | Normal |
| GSM4626766_CATGGCGAGGCCCTCA-1  | GSM4626766 | Normal |
| GSM4626766_CATGGCGAGGTGTGGT-1  | GSM4626766 | Normal |
| GSM4626766_CATGGCGCATGACGGA-1  | GSM4626766 | Normal |
| GSM4626766_CATGGCGGTCCAGTAT-1  | GSM4626766 | Normal |
| GSM4626766_CATGGCGTCCATTAT-1   | GSM4626766 | Normal |
| GSM4626766_CATTATCAGCGTGAGT-1  | GSM4626766 | Normal |
| GSM4626766_CATTATCAGGCTCATT-1  | GSM4626766 | Normal |
| GSM4626766_CATTATCCAAACGCGA-1  | GSM4626766 | Normal |
| GSM4626766_CATTATCCATGAACCT-1  | GSM4626766 | Normal |
| GSM4626766_CATTATCCATGACATC-1  | GSM4626766 | Normal |
| GSM4626766_CATTATCGTATAATGG-1  | GSM4626766 | Normal |
| GSM4626766_CATTATCGTCTAGCGC-1  | GSM4626766 | Normal |
| GSM4626766_CATTATCGTGTGAATA-1  | GSM4626766 | Normal |
| GSM4626766_CATTATCGTTCACGG-1   | GSM4626766 | Normal |
| GSM4626766_CATTATCTCGTTTATC-1  | GSM4626766 | Normal |
| GSM4626766_CATTATCTCTCCAACC-1  | GSM4626766 | Normal |
| GSM4626766_CATTATCTCTGTGCAA-1  | GSM4626766 | Normal |
| GSM4626766_CATTTCGAGAGCCTAG-1  | GSM4626766 | Normal |
| GSM4626766_CATTTCGAGCCGGTAA-1  | GSM4626766 | Normal |
| GSM4626766_CATTTCGAGGCGTACA-1  | GSM4626766 | Normal |
| GSM4626766_CATTTCGAGTCATGCT-1  | GSM4626766 | Normal |
| GSM4626766_CATTTCGAGTCTCCTC-1  | GSM4626766 | Normal |
| GSM4626766_CATTTCGAGTGACTCT-1  | GSM4626766 | Normal |
| GSM4626766_CATTTCGAGTGGCACA-1  | GSM4626766 | Normal |
| GSM4626766_CATTTCGCCAGGCGATA-1 | GSM4626766 | Normal |
| GSM4626766_CATTTCGCCAGGTCGTC-1 | GSM4626766 | Normal |

|                               |            |        |
|-------------------------------|------------|--------|
| GSM4626766_CATTGCGTAGCAAAT-1  | GSM4626766 | Normal |
| GSM4626766_CATTGCGTCTGCGGT-1  | GSM4626766 | Normal |
| GSM4626766_CATTGCGTGCGGTA-1   | GSM4626766 | Normal |
| GSM4626766_CATTGCGTGTATGGG-1  | GSM4626766 | Normal |
| GSM4626766_CATTGCTCAAACGGG-1  | GSM4626766 | Normal |
| GSM4626766_CATTGCTCATGCAAC-1  | GSM4626766 | Normal |
| GSM4626766_CATTGCTCTGTTTGT-1  | GSM4626766 | Normal |
| GSM4626766_CCAATCCAGGAGTCTG-1 | GSM4626766 | Normal |
| GSM4626766_CCAATCCAGTACACCT-1 | GSM4626766 | Normal |
| GSM4626766_CCAATCCCAGCTCCGA-1 | GSM4626766 | Normal |
| GSM4626766_CCAATCCCATGGAATA-1 | GSM4626766 | Normal |
| GSM4626766_CCAATCCGTCATATCG-1 | GSM4626766 | Normal |
| GSM4626766_CCAATCCGTCATTAGC-1 | GSM4626766 | Normal |
| GSM4626766_CCAATCCGTGACAAAT-1 | GSM4626766 | Normal |
| GSM4626766_CCAATCCGTTCCGTCT-1 | GSM4626766 | Normal |
| GSM4626766_CCAATCCTCCGGGTGT-1 | GSM4626766 | Normal |
| GSM4626766_CCAATCCTCTCCGGTT-1 | GSM4626766 | Normal |
| GSM4626766_CCAATCCTCTGCTGCT-1 | GSM4626766 | Normal |
| GSM4626766_CCACCTAAGAAGAAGC-1 | GSM4626766 | Normal |
| GSM4626766_CCACCTAAGCTAGCCC-1 | GSM4626766 | Normal |
| GSM4626766_CCACCTAAGGGAGTAA-1 | GSM4626766 | Normal |
| GSM4626766_CCACCTAAGGTGTGGT-1 | GSM4626766 | Normal |
| GSM4626766_CCACCTAAGTAGATGT-1 | GSM4626766 | Normal |
| GSM4626766_CCACCTACAATCCAAC-1 | GSM4626766 | Normal |
| GSM4626766_CCACCTACAGATAATG-1 | GSM4626766 | Normal |
| GSM4626766_CCACCTACAGGCAGTA-1 | GSM4626766 | Normal |
| GSM4626766_CCACCTACAGGGTATG-1 | GSM4626766 | Normal |
| GSM4626766_CCACCTAGTATATGGA-1 | GSM4626766 | Normal |
| GSM4626766_CCACCTAGTGAGTGAC-1 | GSM4626766 | Normal |
| GSM4626766_CCACCTAGTGATAAAC-1 | GSM4626766 | Normal |
| GSM4626766_CCACCTAGTGATGTGG-1 | GSM4626766 | Normal |
| GSM4626766_CCACCTAGTTATTCTC-1 | GSM4626766 | Normal |
| GSM4626766_CCACCTATCACCGGGT-1 | GSM4626766 | Normal |
| GSM4626766_CCACCTATCACTCTTA-1 | GSM4626766 | Normal |
| GSM4626766_CCACCTATCCCTTGCA-1 | GSM4626766 | Normal |
| GSM4626766_CCACCTATCCGCAGTG-1 | GSM4626766 | Normal |
| GSM4626766_CCACGGAAGACGCAAC-1 | GSM4626766 | Normal |
| GSM4626766_CCACGGAAGTGAATTG-1 | GSM4626766 | Normal |
| GSM4626766_CCACGGACAAGCGCTC-1 | GSM4626766 | Normal |
| GSM4626766_CCACGGACAGGAATCG-1 | GSM4626766 | Normal |
| GSM4626766_CCACGGACATCTCCA-1  | GSM4626766 | Normal |
| GSM4626766_CCACGGAGTCATGCAT-1 | GSM4626766 | Normal |
| GSM4626766_CCACGGAGTCTAAAGA-1 | GSM4626766 | Normal |
| GSM4626766_CCACGGAGTTAGGGTG-1 | GSM4626766 | Normal |
| GSM4626766_CCACGGAGTTCAGACT-1 | GSM4626766 | Normal |
| GSM4626766_CCACGGAGTTCATGGT-1 | GSM4626766 | Normal |
| GSM4626766_CCACGGAGTTGATTCG-1 | GSM4626766 | Normal |
| GSM4626766_CCACGGATCGGCATCG-1 | GSM4626766 | Normal |
| GSM4626766_CCACGGATCTCCTATA-1 | GSM4626766 | Normal |
| GSM4626766_CCACTACAGATGTAAC-1 | GSM4626766 | Normal |
| GSM4626766_CCACTACAGCCCGAAA-1 | GSM4626766 | Normal |
| GSM4626766_CCACTACAGGATGCGT-1 | GSM4626766 | Normal |
| GSM4626766_CCACTACCAACGATGG-1 | GSM4626766 | Normal |
| GSM4626766_CCACTACCAAGCCAC-1  | GSM4626766 | Normal |
| GSM4626766_CCACTACCACATGTGT-1 | GSM4626766 | Normal |
| GSM4626766_CCACTACGTAAATACG-1 | GSM4626766 | Normal |
| GSM4626766_CCACTACGTCCCTTGT-1 | GSM4626766 | Normal |

|                                |            |        |
|--------------------------------|------------|--------|
| GSM4626766_CCCTACTGTCTTGTCC-1  | GSM4626766 | Normal |
| GSM4626766_CCCTACTGTTCTCATT-1  | GSM4626766 | Normal |
| GSM4626766_CCCTACTGTTGGAGGT-1  | GSM4626766 | Normal |
| GSM4626766_CCCTACTCGGATGGA-1   | GSM4626766 | Normal |
| GSM4626766_CCCTACTCTCCTATA-1   | GSM4626766 | Normal |
| GSM4626766_CCAGCGAAGAACAAC-1   | GSM4626766 | Normal |
| GSM4626766_CCAGCGAAGATGTAAC-1  | GSM4626766 | Normal |
| GSM4626766_CCAGCGAAGCAATATG-1  | GSM4626766 | Normal |
| GSM4626766_CCAGCGAAGTGAACGC-1  | GSM4626766 | Normal |
| GSM4626766_CCAGCGACAAGGTTTC-1  | GSM4626766 | Normal |
| GSM4626766_CCAGCGACAATGAAAC-1  | GSM4626766 | Normal |
| GSM4626766_CCAGCGACACCCATGG-1  | GSM4626766 | Normal |
| GSM4626766_CCAGCGAGTATAGGGC-1  | GSM4626766 | Normal |
| GSM4626766_CCAGCGAGTCGGGTCT-1  | GSM4626766 | Normal |
| GSM4626766_CCAGCGAGTGGGTCAA-1  | GSM4626766 | Normal |
| GSM4626766_CCAGCGAGTGTCTGAT-1  | GSM4626766 | Normal |
| GSM4626766_CCAGCGAGTTACGCGC-1  | GSM4626766 | Normal |
| GSM4626766_CCAGCGATCATCTGCC-1  | GSM4626766 | Normal |
| GSM4626766_CCAGCGATCGGGAGTA-1  | GSM4626766 | Normal |
| GSM4626766_CCAGCGATCGTTGACA-1  | GSM4626766 | Normal |
| GSM4626766_CCAGCGATCTACGAGT-1  | GSM4626766 | Normal |
| GSM4626766_CCAGCGATCTATCCTA-1  | GSM4626766 | Normal |
| GSM4626766_CCAGCGATCTTCGGTC-1  | GSM4626766 | Normal |
| GSM4626766_CCATGTCAGGTCATCT-1  | GSM4626766 | Normal |
| GSM4626766_CCATGTCCAAGCCAC-1   | GSM4626766 | Normal |
| GSM4626766_CCATGTCCAAGCTGGA-1  | GSM4626766 | Normal |
| GSM4626766_CCATGTCCACAGACTT-1  | GSM4626766 | Normal |
| GSM4626766_CCATGTCCACTAAGTC-1  | GSM4626766 | Normal |
| GSM4626766_CCATGTCCATACGCCG-1  | GSM4626766 | Normal |
| GSM4626766_CCATGTCCATTGTGCA-1  | GSM4626766 | Normal |
| GSM4626766_CCATGTCTAGCTCCG-1   | GSM4626766 | Normal |
| GSM4626766_CCATGTCTGAGGTG-1    | GSM4626766 | Normal |
| GSM4626766_CCATGTCTCTATGTGG-1  | GSM4626766 | Normal |
| GSM4626766_CCATGTCTCTCCAGGG-1  | GSM4626766 | Normal |
| GSM4626766_CCATGTCTCTGTCTCG-1  | GSM4626766 | Normal |
| GSM4626766_CCATTCGAGAGCTGGT-1  | GSM4626766 | Normal |
| GSM4626766_CCATTCGAGCTAAACA-1  | GSM4626766 | Normal |
| GSM4626766_CCATTCGCAAGCGAGT-1  | GSM4626766 | Normal |
| GSM4626766_CCATTCGCAAGGCTCC-1  | GSM4626766 | Normal |
| GSM4626766_CCATTCGCACACCGCA-1  | GSM4626766 | Normal |
| GSM4626766_CCATTCGCACATCCGG-1  | GSM4626766 | Normal |
| GSM4626766_CCATTCGCAGTCTTCC-1  | GSM4626766 | Normal |
| GSM4626766_CCATTCGCATCCAACA-1  | GSM4626766 | Normal |
| GSM4626766_CCATTCGCATCCCACT-1  | GSM4626766 | Normal |
| GSM4626766_CCATTCGGTACAGCAG-1  | GSM4626766 | Normal |
| GSM4626766_CCATTCGGTCATACTG-1  | GSM4626766 | Normal |
| GSM4626766_CCATTCGGTGAACCTT-1  | GSM4626766 | Normal |
| GSM4626766_CCATTCGGTGCATCTA-1  | GSM4626766 | Normal |
| GSM4626766_CCATTCGTCAACAATGC-1 | GSM4626766 | Normal |
| GSM4626766_CCATTCGTCTTGCATT-1  | GSM4626766 | Normal |
| GSM4626766_CCCAATCAGAAGAAGC-1  | GSM4626766 | Normal |
| GSM4626766_CCCAATCAGACTAGAT-1  | GSM4626766 | Normal |
| GSM4626766_CCCAATCAGAGTGAGA-1  | GSM4626766 | Normal |
| GSM4626766_CCCAATCAGTAGATGT-1  | GSM4626766 | Normal |
| GSM4626766_CCCAATCAGTCATCCA-1  | GSM4626766 | Normal |
| GSM4626766_CCCAATCCAATGGAGC-1  | GSM4626766 | Normal |
| GSM4626766_CCCAATCCACAACGTT-1  | GSM4626766 | Normal |

|                                 |            |        |
|---------------------------------|------------|--------|
| GSM4626766_CCCAATCCAGACACTT-1   | GSM4626766 | Normal |
| GSM4626766_CCCAATCGTCAGGACA-1   | GSM4626766 | Normal |
| GSM4626766_CCCAATCGTCTAGCCG-1   | GSM4626766 | Normal |
| GSM4626766_CCCAATCGTCTCTCTG-1   | GSM4626766 | Normal |
| GSM4626766_CCCAATCGTTATGTGC-1   | GSM4626766 | Normal |
| GSM4626766_CCCAATCTCATTATCC-1   | GSM4626766 | Normal |
| GSM4626766_CCCAATCTCTCTGTGCG-1  | GSM4626766 | Normal |
| GSM4626766_CCCAGTTAGCCAGTTT-1   | GSM4626766 | Normal |
| GSM4626766_CCCAGTTAGTAGGCCA-1   | GSM4626766 | Normal |
| GSM4626766_CCCAGTTAGTCCATAC-1   | GSM4626766 | Normal |
| GSM4626766_CCCAGTTAGTCTTGCA-1   | GSM4626766 | Normal |
| GSM4626766_CCCAGTTGTACTIONAAC-1 | GSM4626766 | Normal |
| GSM4626766_CCCAGTTGTCATTAGC-1   | GSM4626766 | Normal |
| GSM4626766_CCCAGTTTCAGGCGAA-1   | GSM4626766 | Normal |
| GSM4626766_CCCAGTTTCATCGGAT-1   | GSM4626766 | Normal |
| GSM4626766_CCCAGTTTCCCTAATT-1   | GSM4626766 | Normal |
| GSM4626766_CCCAGTTTCCGTTGTC-1   | GSM4626766 | Normal |
| GSM4626766_CCCAGTTTCTATTCA-1    | GSM4626766 | Normal |
| GSM4626766_CCCAGTTTTCGGTTCGG-1  | GSM4626766 | Normal |
| GSM4626766_CCCAGTTTCGTTTATC-1   | GSM4626766 | Normal |
| GSM4626766_CCCATACAGATCCGAG-1   | GSM4626766 | Normal |
| GSM4626766_CCCATACAGCACAGGT-1   | GSM4626766 | Normal |
| GSM4626766_CCCATACAGGTAGCTG-1   | GSM4626766 | Normal |
| GSM4626766_CCCATACAGTTAGGTA-1   | GSM4626766 | Normal |
| GSM4626766_CCCATACCACATAACC-1   | GSM4626766 | Normal |
| GSM4626766_CCCATACCAGCTCGCA-1   | GSM4626766 | Normal |
| GSM4626766_CCCATACGTCACCTCC-1   | GSM4626766 | Normal |
| GSM4626766_CCCATACTCAACGGGA-1   | GSM4626766 | Normal |
| GSM4626766_CCCATACTCAGTTCGA-1   | GSM4626766 | Normal |
| GSM4626766_CCCATACTCGGAATCT-1   | GSM4626766 | Normal |
| GSM4626766_CCCATACTCTCCAACC-1   | GSM4626766 | Normal |
| GSM4626766_CCCTCCTAGACTTGAA-1   | GSM4626766 | Normal |
| GSM4626766_CCCTCCTAGCGTCAAG-1   | GSM4626766 | Normal |
| GSM4626766_CCCTCCTAGGGAGTAA-1   | GSM4626766 | Normal |
| GSM4626766_CCCTCCTAGGTGCACA-1   | GSM4626766 | Normal |
| GSM4626766_CCCTCCTAGTGCTGCC-1   | GSM4626766 | Normal |
| GSM4626766_CCCTCCTAGTGTGTTG-1   | GSM4626766 | Normal |
| GSM4626766_CCCTCCTCAATCACAC-1   | GSM4626766 | Normal |
| GSM4626766_CCCTCCTCACACTGCG-1   | GSM4626766 | Normal |
| GSM4626766_CCCTCCTCACATTTCT-1   | GSM4626766 | Normal |
| GSM4626766_CCCTCCTCACCGAAAG-1   | GSM4626766 | Normal |
| GSM4626766_CCCTCCTGTAAATGAC-1   | GSM4626766 | Normal |
| GSM4626766_CCCTCCTGTAATAGCA-1   | GSM4626766 | Normal |
| GSM4626766_CCCTCCTGTACCGCTG-1   | GSM4626766 | Normal |
| GSM4626766_CCCTCCTGTACCTACA-1   | GSM4626766 | Normal |
| GSM4626766_CCCTCCTGTCCGTGAC-1   | GSM4626766 | Normal |
| GSM4626766_CCCTCCTGTCTGCGGT-1   | GSM4626766 | Normal |
| GSM4626766_CCCTCCTGTTACCTC-1    | GSM4626766 | Normal |
| GSM4626766_CCCTCCTTCTACTTAC-1   | GSM4626766 | Normal |
| GSM4626766_CCGGGATAGAATCTCC-1   | GSM4626766 | Normal |
| GSM4626766_CCGGGATAGAGAGCTC-1   | GSM4626766 | Normal |
| GSM4626766_CCGGGATAGCCTTGAT-1   | GSM4626766 | Normal |
| GSM4626766_CCGGGATAGCGTTGCC-1   | GSM4626766 | Normal |
| GSM4626766_CCGGGATAGCTGTTCA-1   | GSM4626766 | Normal |
| GSM4626766_CCGGGATCATGATCCA-1   | GSM4626766 | Normal |
| GSM4626766_CCGGGATGTACTIONAAC-1 | GSM4626766 | Normal |
| GSM4626766_CCGGGATGTATGCTTG-1   | GSM4626766 | Normal |

|                                |            |        |
|--------------------------------|------------|--------|
| GSM4626766_CCGGGATGTGCGCATCG-1 | GSM4626766 | Normal |
| GSM4626766_CCGGGATGTGCCATG-1   | GSM4626766 | Normal |
| GSM4626766_CCGGGATGTGTAACGG-1  | GSM4626766 | Normal |
| GSM4626766_CCGGGATGTTTAGCTG-1  | GSM4626766 | Normal |
| GSM4626766_CCGGGATTACCTTAT-1   | GSM4626766 | Normal |
| GSM4626766_CCGGGATTCCCTCTTT-1  | GSM4626766 | Normal |
| GSM4626766_CCGGGATTGCGCTGAG-1  | GSM4626766 | Normal |
| GSM4626766_CCGGGATTCTAGCACA-1  | GSM4626766 | Normal |
| GSM4626766_CCGGGATTCTGATTCT-1  | GSM4626766 | Normal |
| GSM4626766_CCGGTAGAGTGGGCTA-1  | GSM4626766 | Normal |
| GSM4626766_CCGGTAGAGTTGAGAT-1  | GSM4626766 | Normal |
| GSM4626766_CCGGTAGCAATGGAGC-1  | GSM4626766 | Normal |
| GSM4626766_CCGGTAGCAGCAGTTT-1  | GSM4626766 | Normal |
| GSM4626766_CCGGTAGCATTGGTAC-1  | GSM4626766 | Normal |
| GSM4626766_CCGGTAGGTACCAGTT-1  | GSM4626766 | Normal |
| GSM4626766_CCGGTAGGTCTTTTCAT-1 | GSM4626766 | Normal |
| GSM4626766_CCGGTAGTCAGTTAGC-1  | GSM4626766 | Normal |
| GSM4626766_CCGGTAGTCGCTTAGA-1  | GSM4626766 | Normal |
| GSM4626766_CCGGTAGTCTGGGCCA-1  | GSM4626766 | Normal |
| GSM4626766_CCGTACTAGAAGGACA-1  | GSM4626766 | Normal |
| GSM4626766_CCGTACTAGATCGGGT-1  | GSM4626766 | Normal |
| GSM4626766_CCGTACTAGCCAGTAG-1  | GSM4626766 | Normal |
| GSM4626766_CCGTACTAGCTCCCAG-1  | GSM4626766 | Normal |
| GSM4626766_CCGTACTAGGCCATAG-1  | GSM4626766 | Normal |
| GSM4626766_CCGTACTCAAGAAAGG-1  | GSM4626766 | Normal |
| GSM4626766_CCGTACTTCTTAGCCC-1  | GSM4626766 | Normal |
| GSM4626766_CCGTGGAAGGCGTACA-1  | GSM4626766 | Normal |
| GSM4626766_CCGTGGAAGTGAAGAG-1  | GSM4626766 | Normal |
| GSM4626766_CCGTGGAACACCCTATC-1 | GSM4626766 | Normal |
| GSM4626766_CCGTGGAAGTAAGTTCC-1 | GSM4626766 | Normal |
| GSM4626766_CCGTGGAAGTAAAGACA-1 | GSM4626766 | Normal |
| GSM4626766_CCGTGGAATCTCCGGTT-1 | GSM4626766 | Normal |
| GSM4626766_CCGTGGAATCTGCAGTA-1 | GSM4626766 | Normal |
| GSM4626766_CCGTTCAGTTTCGCAT-1  | GSM4626766 | Normal |
| GSM4626766_CCGTTCACAAACAACA-1  | GSM4626766 | Normal |
| GSM4626766_CCGTTCACAAGTCTGT-1  | GSM4626766 | Normal |
| GSM4626766_CCGTTCACATGCCACG-1  | GSM4626766 | Normal |
| GSM4626766_CCGTTCACATGTCCTC-1  | GSM4626766 | Normal |
| GSM4626766_CCGTTCAGTAATCACC-1  | GSM4626766 | Normal |
| GSM4626766_CCGTTCAGTGATAAAC-1  | GSM4626766 | Normal |
| GSM4626766_CCGTTCAGTGCCTGTG-1  | GSM4626766 | Normal |
| GSM4626766_CCGTTCATCCAACTG-1   | GSM4626766 | Normal |
| GSM4626766_CCGTTCATCCCTGACT-1  | GSM4626766 | Normal |
| GSM4626766_CCGTTCATCCTTTTCGG-1 | GSM4626766 | Normal |
| GSM4626766_CCTAAAGAGCTCCTTC-1  | GSM4626766 | Normal |
| GSM4626766_CCTAAAGAGGATGGTC-1  | GSM4626766 | Normal |
| GSM4626766_CCTAAAGAGGTGATTA-1  | GSM4626766 | Normal |
| GSM4626766_CCTAAAGCAAGCCGTC-1  | GSM4626766 | Normal |
| GSM4626766_CCTAAAGCACACATGT-1  | GSM4626766 | Normal |
| GSM4626766_CCTAAAGCATGAGCGA-1  | GSM4626766 | Normal |
| GSM4626766_CCTAAAGGTATTAGCC-1  | GSM4626766 | Normal |
| GSM4626766_CCTAAAGTCACATAGC-1  | GSM4626766 | Normal |
| GSM4626766_CCTAAAGTCAGCTGGC-1  | GSM4626766 | Normal |
| GSM4626766_CCTAAAGTCCTATTCA-1  | GSM4626766 | Normal |
| GSM4626766_CCTAAAGTCTATCCTA-1  | GSM4626766 | Normal |
| GSM4626766_CCTAAAGTCTTATCTG-1  | GSM4626766 | Normal |
| GSM4626766_CCTACACAGACTCGGA-1  | GSM4626766 | Normal |

|                                |            |        |
|--------------------------------|------------|--------|
| GSM4626766_CCTACACAGATCGGGT-1  | GSM4626766 | Normal |
| GSM4626766_CCTACACAGCGTGAGT-1  | GSM4626766 | Normal |
| GSM4626766_CCTACACCAAACGTGG-1  | GSM4626766 | Normal |
| GSM4626766_CCTACACCAAGTACCT-1  | GSM4626766 | Normal |
| GSM4626766_CCTACACCACCAGTTA-1  | GSM4626766 | Normal |
| GSM4626766_CCTACACCACGGCCAT-1  | GSM4626766 | Normal |
| GSM4626766_CCTACACCACCTCGACG-1 | GSM4626766 | Normal |
| GSM4626766_CCTACACCATATGCTG-1  | GSM4626766 | Normal |
| GSM4626766_CCTACACCATGTTCGAT-1 | GSM4626766 | Normal |
| GSM4626766_CCTACACGTATAGGGC-1  | GSM4626766 | Normal |
| GSM4626766_CCTACACGTATAGGTA-1  | GSM4626766 | Normal |
| GSM4626766_CCTACACGTACAAAGG-1  | GSM4626766 | Normal |
| GSM4626766_CCTACACGTTCGGCATC-1 | GSM4626766 | Normal |
| GSM4626766_CCTACACGTGGGTATG-1  | GSM4626766 | Normal |
| GSM4626766_CCTACACTCACTTCAT-1  | GSM4626766 | Normal |
| GSM4626766_CCTACACTCCATGCTC-1  | GSM4626766 | Normal |
| GSM4626766_CCTACACTCGAATGGG-1  | GSM4626766 | Normal |
| GSM4626766_CCTACACTCGAGCCCA-1  | GSM4626766 | Normal |
| GSM4626766_CCTACACTCTTTCCTC-1  | GSM4626766 | Normal |
| GSM4626766_CCTACCAAGAGTACAT-1  | GSM4626766 | Normal |
| GSM4626766_CCTACCAAGCCCTAAT-1  | GSM4626766 | Normal |
| GSM4626766_CCTACCAAGCGTAATA-1  | GSM4626766 | Normal |
| GSM4626766_CCTACCAAGTACATGA-1  | GSM4626766 | Normal |
| GSM4626766_CCTACCACAAATTGCC-1  | GSM4626766 | Normal |
| GSM4626766_CCTACCACAGGATCGA-1  | GSM4626766 | Normal |
| GSM4626766_CCTACCACATCCCACT-1  | GSM4626766 | Normal |
| GSM4626766_CCTACCACATCTATGG-1  | GSM4626766 | Normal |
| GSM4626766_CCTACCAGTAGAAGGA-1  | GSM4626766 | Normal |
| GSM4626766_CCTACCAGTATTCTCT-1  | GSM4626766 | Normal |
| GSM4626766_CCTACCAGTCACAAGG-1  | GSM4626766 | Normal |
| GSM4626766_CCTACCAGTCATACTG-1  | GSM4626766 | Normal |
| GSM4626766_CCTACCAGTTACGGAG-1  | GSM4626766 | Normal |
| GSM4626766_CCTACCATCCAAACAC-1  | GSM4626766 | Normal |
| GSM4626766_CCTACCATCCAATGGT-1  | GSM4626766 | Normal |
| GSM4626766_CCTACCATCCCACTCCA-1 | GSM4626766 | Normal |
| GSM4626766_CCTACCATCTGCGTAA-1  | GSM4626766 | Normal |
| GSM4626766_CCTACCATCTTGGGTA-1  | GSM4626766 | Normal |
| GSM4626766_CCTAGCTAGAGCTGCA-1  | GSM4626766 | Normal |
| GSM4626766_CCTAGCTAGCCAGTTT-1  | GSM4626766 | Normal |
| GSM4626766_CCTAGCTAGCTAACAA-1  | GSM4626766 | Normal |
| GSM4626766_CCTAGCTCAAAGAATC-1  | GSM4626766 | Normal |
| GSM4626766_CCTAGCTCACAGACAG-1  | GSM4626766 | Normal |
| GSM4626766_CCTAGCTGTCAGTGGA-1  | GSM4626766 | Normal |
| GSM4626766_CCTAGCTGTGCGGTGT-1  | GSM4626766 | Normal |
| GSM4626766_CCTAGCTGTGCGCATC-1  | GSM4626766 | Normal |
| GSM4626766_CCTAGCTGTGCAACGA-1  | GSM4626766 | Normal |
| GSM4626766_CCTAGCTTACCTCGT-1   | GSM4626766 | Normal |
| GSM4626766_CCTAGCTTCACTACGT-1  | GSM4626766 | Normal |
| GSM4626766_CCTAGCTTCCGAATGT-1  | GSM4626766 | Normal |
| GSM4626766_CCTAGCTTCCGAGCCA-1  | GSM4626766 | Normal |
| GSM4626766_CCTAGCTTCCGTTGTC-1  | GSM4626766 | Normal |
| GSM4626766_CCTAGCTTCTGACCTC-1  | GSM4626766 | Normal |
| GSM4626766_CCTAGCTTCTTGTACT-1  | GSM4626766 | Normal |
| GSM4626766_CCTATTACAGCCTGTG-1  | GSM4626766 | Normal |
| GSM4626766_CCTATTACAGTAACGG-1  | GSM4626766 | Normal |
| GSM4626766_CCTATTACAGTCCTTC-1  | GSM4626766 | Normal |
| GSM4626766_CCTATTACAGTCGATT-1  | GSM4626766 | Normal |

|                                |            |        |
|--------------------------------|------------|--------|
| GSM4626766_CCTATTACAGTCGTGC-1  | GSM4626766 | Normal |
| GSM4626766_CCTATTACATAGAAAC-1  | GSM4626766 | Normal |
| GSM4626766_CCTATTACATGCAACT-1  | GSM4626766 | Normal |
| GSM4626766_CCTATTAGTAATCACC-1  | GSM4626766 | Normal |
| GSM4626766_CCTATTAGTACCATCA-1  | GSM4626766 | Normal |
| GSM4626766_CCTATTAGTACTCGCG-1  | GSM4626766 | Normal |
| GSM4626766_CCTATTAGTCTAGTGT-1  | GSM4626766 | Normal |
| GSM4626766_CCTATTAGTGTGCTG-1   | GSM4626766 | Normal |
| GSM4626766_CCTATTATCGAATCCA-1  | GSM4626766 | Normal |
| GSM4626766_CCTATTATCGTAGATC-1  | GSM4626766 | Normal |
| GSM4626766_CCTCAGTAGGCTACGA-1  | GSM4626766 | Normal |
| GSM4626766_CCTCAGTCAATGGATA-1  | GSM4626766 | Normal |
| GSM4626766_CCTCAGTCAGGGTTAG-1  | GSM4626766 | Normal |
| GSM4626766_CCTCAGTGTCTGGAGA-1  | GSM4626766 | Normal |
| GSM4626766_CCTCAGTGTGAAATCA-1  | GSM4626766 | Normal |
| GSM4626766_CCTCAGTGTGAGTATA-1  | GSM4626766 | Normal |
| GSM4626766_CCTCAGTGTGCTCTTC-1  | GSM4626766 | Normal |
| GSM4626766_CCTCAGTTCATTCACT-1  | GSM4626766 | Normal |
| GSM4626766_CCTCAGTTCCTTTACA-1  | GSM4626766 | Normal |
| GSM4626766_CCTCAGTTCGTACCGG-1  | GSM4626766 | Normal |
| GSM4626766_CCTCTGAAGAGCCCAA-1  | GSM4626766 | Normal |
| GSM4626766_CCTCTGAAGGCACATG-1  | GSM4626766 | Normal |
| GSM4626766_CCTCTGAAGGGTTTCT-1  | GSM4626766 | Normal |
| GSM4626766_CCTCTGAAGTGGTAAT-1  | GSM4626766 | Normal |
| GSM4626766_CCTCTGAAGTTCGCGC-1  | GSM4626766 | Normal |
| GSM4626766_CCTCTGACACATAACC-1  | GSM4626766 | Normal |
| GSM4626766_CCTCTGAGTATCGCAT-1  | GSM4626766 | Normal |
| GSM4626766_CCTCTGATCCAACCAA-1  | GSM4626766 | Normal |
| GSM4626766_CCTCTGATCCATGAGT-1  | GSM4626766 | Normal |
| GSM4626766_CCTCTGATCCTCTAGC-1  | GSM4626766 | Normal |
| GSM4626766_CCTCTGATCGGAAATA-1  | GSM4626766 | Normal |
| GSM4626766_CCTCTGATCTGTCTCG-1  | GSM4626766 | Normal |
| GSM4626766_CCTTACGAGGTGACCA-1  | GSM4626766 | Normal |
| GSM4626766_CCTTACGAGTCCAGGA-1  | GSM4626766 | Normal |
| GSM4626766_CCTTACGCACCATGTA-1  | GSM4626766 | Normal |
| GSM4626766_CCTTACGCATTAACCG-1  | GSM4626766 | Normal |
| GSM4626766_CCTTACGGTAAGTAGT-1  | GSM4626766 | Normal |
| GSM4626766_CCTTACGGTAGTAGTA-1  | GSM4626766 | Normal |
| GSM4626766_CCTTACGGTTCGCGAC-1  | GSM4626766 | Normal |
| GSM4626766_CCTTACGTCAGCTGGC-1  | GSM4626766 | Normal |
| GSM4626766_CCTTACGTCCGCAAGC-1  | GSM4626766 | Normal |
| GSM4626766_CCTTACGTCTGTGAA-1   | GSM4626766 | Normal |
| GSM4626766_CCTTACGTCTTACCGC-1  | GSM4626766 | Normal |
| GSM4626766_CCTTCCCAGCTGTCTA-1  | GSM4626766 | Normal |
| GSM4626766_CCTTCCCAGTGTGGCA-1  | GSM4626766 | Normal |
| GSM4626766_CCTTCCCAGTTAACGA-1  | GSM4626766 | Normal |
| GSM4626766_CCTTCCCCAACACGCC-1  | GSM4626766 | Normal |
| GSM4626766_CCTTCCCCAAGGTGTG-1  | GSM4626766 | Normal |
| GSM4626766_CCTTCCCCGTATAATGG-1 | GSM4626766 | Normal |
| GSM4626766_CCTTCCCCGTCTTTAT-1  | GSM4626766 | Normal |
| GSM4626766_CCTTCCCCGTGATGTGG-1 | GSM4626766 | Normal |
| GSM4626766_CCTTCCCCGTGCATCTA-1 | GSM4626766 | Normal |
| GSM4626766_CCTTCCCTCGACAGCC-1  | GSM4626766 | Normal |
| GSM4626766_CCTTCCCTCGTTGCCT-1  | GSM4626766 | Normal |
| GSM4626766_CCTTCCCTCTATGTGG-1  | GSM4626766 | Normal |
| GSM4626766_CCTTCCAAGAAACGCC-1  | GSM4626766 | Normal |
| GSM4626766_CCTTCCAAGAAACAACT-1 | GSM4626766 | Normal |

|                                |            |        |
|--------------------------------|------------|--------|
| GSM4626766_CCTTCGAAGACAAGCC-1  | GSM4626766 | Normal |
| GSM4626766_CCTTCGAAGAGTAATC-1  | GSM4626766 | Normal |
| GSM4626766_CCTTCGAAGGTGACCA-1  | GSM4626766 | Normal |
| GSM4626766_CCTTCGAAGTTAGCGG-1  | GSM4626766 | Normal |
| GSM4626766_CCTTCGACATGCTAGT-1  | GSM4626766 | Normal |
| GSM4626766_CCTTCGAGTCAGAAGC-1  | GSM4626766 | Normal |
| GSM4626766_CCTTCGAGTCCCGACA-1  | GSM4626766 | Normal |
| GSM4626766_CCTTCGAGTCCGAATT-1  | GSM4626766 | Normal |
| GSM4626766_CCTTCGAGTGACAAAT-1  | GSM4626766 | Normal |
| GSM4626766_CCTTCGAGTGTCTGAT-1  | GSM4626766 | Normal |
| GSM4626766_CCTTCGAGTTCGGCAC-1  | GSM4626766 | Normal |
| GSM4626766_CCTTCGAGTTGAACTC-1  | GSM4626766 | Normal |
| GSM4626766_CCTTCGATCAACGGGA-1  | GSM4626766 | Normal |
| GSM4626766_CCTTCGATCAGTCCCT-1  | GSM4626766 | Normal |
| GSM4626766_CCTTCGATCCTCATT-1   | GSM4626766 | Normal |
| GSM4626766_CCTTCGATCGGCTACG-1  | GSM4626766 | Normal |
| GSM4626766_CCTTCGATCTCGTTTA-1  | GSM4626766 | Normal |
| GSM4626766_CCTTCGATCTTGTTTG-1  | GSM4626766 | Normal |
| GSM4626766_CCTTTCTAGAGCTGGT-1  | GSM4626766 | Normal |
| GSM4626766_CCTTTCTAGGCTAGAC-1  | GSM4626766 | Normal |
| GSM4626766_CCTTTCTAGTAGCGGT-1  | GSM4626766 | Normal |
| GSM4626766_CCTTTCTCAGCTGCTG-1  | GSM4626766 | Normal |
| GSM4626766_CCTTTCTGTAAACACA-1  | GSM4626766 | Normal |
| GSM4626766_CCTTTCTGTACAAGTA-1  | GSM4626766 | Normal |
| GSM4626766_CCTTTCTGTGCGGTA-1   | GSM4626766 | Normal |
| GSM4626766_CCTTTCTTCAAGTGCAT-1 | GSM4626766 | Normal |
| GSM4626766_CCTTTCTTCCATGCTC-1  | GSM4626766 | Normal |
| GSM4626766_CCTTTCTTCTGATTCT-1  | GSM4626766 | Normal |
| GSM4626766_CCTTTCTTCTGCCAGG-1  | GSM4626766 | Normal |
| GSM4626766_CGAACATAGACAGGCT-1  | GSM4626766 | Normal |
| GSM4626766_CGAACATAGCTGTTCA-1  | GSM4626766 | Normal |
| GSM4626766_CGAACATAGGCCATAG-1  | GSM4626766 | Normal |
| GSM4626766_CGAACATCAAGGACAC-1  | GSM4626766 | Normal |
| GSM4626766_CGAACATGTAAACGCG-1  | GSM4626766 | Normal |
| GSM4626766_CGAACATGTCATATGC-1  | GSM4626766 | Normal |
| GSM4626766_CGAACATGTGACTCAT-1  | GSM4626766 | Normal |
| GSM4626766_CGAACATGTTAAAGAC-1  | GSM4626766 | Normal |
| GSM4626766_CGAACATGTTACGTCA-1  | GSM4626766 | Normal |
| GSM4626766_CGAACATGTTACGCGC-1  | GSM4626766 | Normal |
| GSM4626766_CGAACATTCAGGCCCA-1  | GSM4626766 | Normal |
| GSM4626766_CGAACATTCGAACGGA-1  | GSM4626766 | Normal |
| GSM4626766_CGAACATTCTGGTTCC-1  | GSM4626766 | Normal |
| GSM4626766_CGAATGTAGCTGTCTA-1  | GSM4626766 | Normal |
| GSM4626766_CGAATGTAGGACCACA-1  | GSM4626766 | Normal |
| GSM4626766_CGAATGTAGGCATGTG-1  | GSM4626766 | Normal |
| GSM4626766_CGAATGTAGGCGACAT-1  | GSM4626766 | Normal |
| GSM4626766_CGAATGTAGGGCACTA-1  | GSM4626766 | Normal |
| GSM4626766_CGAATGTACATTCGA-1   | GSM4626766 | Normal |
| GSM4626766_CGAATGTGTCTCAACA-1  | GSM4626766 | Normal |
| GSM4626766_CGAATGTGTGATAAGT-1  | GSM4626766 | Normal |
| GSM4626766_CGAATGTGTGTCGCTG-1  | GSM4626766 | Normal |
| GSM4626766_CGAATGTTTCAGCGACC-1 | GSM4626766 | Normal |
| GSM4626766_CGAATGTTTCAGTTTGG-1 | GSM4626766 | Normal |
| GSM4626766_CGAATGTTTCGGTCCGA-1 | GSM4626766 | Normal |
| GSM4626766_CGACCTTAGACACGAC-1  | GSM4626766 | Normal |
| GSM4626766_CGACCTTAGGCTCAGA-1  | GSM4626766 | Normal |



|                                |            |        |
|--------------------------------|------------|--------|
| GSM4626766_CGACCTTAGGTCGGAT-1  | GSM4626766 | Normal |
| GSM4626766_CGACCTTAGTTGCAGG-1  | GSM4626766 | Normal |
| GSM4626766_CGACCTTCAAAGGAAG-1  | GSM4626766 | Normal |
| GSM4626766_CGACCTTCAACTGCGC-1  | GSM4626766 | Normal |
| GSM4626766_CGACCTTCATACGCCG-1  | GSM4626766 | Normal |
| GSM4626766_CGACCTTCATCCGGGT-1  | GSM4626766 | Normal |
| GSM4626766_CGACCTTTCAAAGACA-1  | GSM4626766 | Normal |
| GSM4626766_CGACCTTTCCACTGGG-1  | GSM4626766 | Normal |
| GSM4626766_CGACCTTTTCGAGCCCA-1 | GSM4626766 | Normal |
| GSM4626766_CGACCTTTTCGGTTAAC-1 | GSM4626766 | Normal |
| GSM4626766_CGACCTTTCTTTAGGG-1  | GSM4626766 | Normal |
| GSM4626766_CGACTTCAGGAGTTGC-1  | GSM4626766 | Normal |
| GSM4626766_CGACTTCCACGGTTTA-1  | GSM4626766 | Normal |
| GSM4626766_CGACTTCCAGACAGGT-1  | GSM4626766 | Normal |
| GSM4626766_CGACTTCCAGTATGCT-1  | GSM4626766 | Normal |
| GSM4626766_CGACTTCGTACTIONT-1  | GSM4626766 | Normal |
| GSM4626766_CGACTTCGTCCTCCAT-1  | GSM4626766 | Normal |
| GSM4626766_CGACTTCGTCTAGCCG-1  | GSM4626766 | Normal |
| GSM4626766_CGACTTCGTTCCGGCA-1  | GSM4626766 | Normal |
| GSM4626766_CGACTTCTCAAGGTA-1   | GSM4626766 | Normal |
| GSM4626766_CGACTTCTCGGTAGC-1   | GSM4626766 | Normal |
| GSM4626766_CGAGAAGAGGCCCTTG-1  | GSM4626766 | Normal |
| GSM4626766_CGAGAAGAGTACGATA-1  | GSM4626766 | Normal |
| GSM4626766_CGAGAAGCAATAGAGT-1  | GSM4626766 | Normal |
| GSM4626766_CGAGAAGCACATCCGG-1  | GSM4626766 | Normal |
| GSM4626766_CGAGAAGCACATGGGA-1  | GSM4626766 | Normal |
| GSM4626766_CGAGAAGCATAACGCCG-1 | GSM4626766 | Normal |
| GSM4626766_CGAGAAGGTCATCCCT-1  | GSM4626766 | Normal |
| GSM4626766_CGAGAAGGTCATCGGC-1  | GSM4626766 | Normal |
| GSM4626766_CGAGAAGGTCCCGACA-1  | GSM4626766 | Normal |
| GSM4626766_CGAGAAGGTGAGGGAG-1  | GSM4626766 | Normal |
| GSM4626766_CGAGAAGGTGATAAGT-1  | GSM4626766 | Normal |
| GSM4626766_CGAGAAGTCACCAGGC-1  | GSM4626766 | Normal |
| GSM4626766_CGAGAAGTCGAGAACG-1  | GSM4626766 | Normal |
| GSM4626766_CGAGAAGTCTCGCATC-1  | GSM4626766 | Normal |
| GSM4626766_CGAGCACAGCTAGCCC-1  | GSM4626766 | Normal |
| GSM4626766_CGAGCACAGCTCCCAG-1  | GSM4626766 | Normal |
| GSM4626766_CGAGCACAGGTAGCTG-1  | GSM4626766 | Normal |
| GSM4626766_CGAGCACACGTCAGC-1   | GSM4626766 | Normal |
| GSM4626766_CGAGCACATACTCTT-1   | GSM4626766 | Normal |
| GSM4626766_CGAGCACGTCGCTTTC-1  | GSM4626766 | Normal |
| GSM4626766_CGAGCACGTTAAAGAC-1  | GSM4626766 | Normal |
| GSM4626766_CGAGCACTCGTAGGAG-1  | GSM4626766 | Normal |
| GSM4626766_CGAGCCAAGCGCTCCA-1  | GSM4626766 | Normal |
| GSM4626766_CGAGCCAAGTGCGTGA-1  | GSM4626766 | Normal |
| GSM4626766_CGAGCCAAGTTACCCA-1  | GSM4626766 | Normal |
| GSM4626766_CGAGCCACATTCACCT-1  | GSM4626766 | Normal |
| GSM4626766_CGAGCCAGTCCGTGAC-1  | GSM4626766 | Normal |
| GSM4626766_CGAGCCAGTCCGCATG-1  | GSM4626766 | Normal |
| GSM4626766_CGAGCCAGTTACGCGC-1  | GSM4626766 | Normal |
| GSM4626766_CGAGCCAGTTCCGTCT-1  | GSM4626766 | Normal |
| GSM4626766_CGAGCCATCATGCTCC-1  | GSM4626766 | Normal |
| GSM4626766_CGAGCCATCCTCCTAG-1  | GSM4626766 | Normal |
| GSM4626766_CGAGCCATCGATAGAA-1  | GSM4626766 | Normal |
| GSM4626766_CGAGCCATCTCGTTTA-1  | GSM4626766 | Normal |
| GSM4626766_CGAGCCATCTGCTGCT-1  | GSM4626766 | Normal |
| GSM4626766_CGAGCCATCTTGTTTG-1  | GSM4626766 | Normal |

|                                |            |        |
|--------------------------------|------------|--------|
| GSM4626766_CGATCGGAGTCCATAC-1  | GSM4626766 | Normal |
| GSM4626766_CGATCGGAGTGCGTGA-1  | GSM4626766 | Normal |
| GSM4626766_CGATCGGCACGGTAAG-1  | GSM4626766 | Normal |
| GSM4626766_CGATCGGCATGCCTTC-1  | GSM4626766 | Normal |
| GSM4626766_CGATCGGCATTATCTC-1  | GSM4626766 | Normal |
| GSM4626766_CGATCGGGTAATTGGA-1  | GSM4626766 | Normal |
| GSM4626766_CGATCGGGTACAGTGG-1  | GSM4626766 | Normal |
| GSM4626766_CGATCGGTTCGGTTCGG-1 | GSM4626766 | Normal |
| GSM4626766_CGATGGCAGTGGAGAA-1  | GSM4626766 | Normal |
| GSM4626766_CGATGGCGTATAATGG-1  | GSM4626766 | Normal |
| GSM4626766_CGATGGCTCAAGGTAA-1  | GSM4626766 | Normal |
| GSM4626766_CGATGGCTCAGTTCGA-1  | GSM4626766 | Normal |
| GSM4626766_CGATGGCTCCAAACAC-1  | GSM4626766 | Normal |
| GSM4626766_CGATGGCTCGAGAGCA-1  | GSM4626766 | Normal |
| GSM4626766_CGATGGCTCTACGAGT-1  | GSM4626766 | Normal |
| GSM4626766_CGATGGCTCTTTACGT-1  | GSM4626766 | Normal |
| GSM4626766_CGATGTAAGAAGGTGA-1  | GSM4626766 | Normal |
| GSM4626766_CGATGTAAGGGATCTG-1  | GSM4626766 | Normal |
| GSM4626766_CGATGTAAGGGTCTCC-1  | GSM4626766 | Normal |
| GSM4626766_CGATGTACAAGCCATT-1  | GSM4626766 | Normal |
| GSM4626766_CGATGTAGTAAGGATT-1  | GSM4626766 | Normal |
| GSM4626766_CGATGTAGTAGTACCT-1  | GSM4626766 | Normal |
| GSM4626766_CGATGTAGTCAGCTAT-1  | GSM4626766 | Normal |
| GSM4626766_CGATGTAGTGAAATCA-1  | GSM4626766 | Normal |
| GSM4626766_CGATGTATCAGGCGAA-1  | GSM4626766 | Normal |
| GSM4626766_CGATGTATCCTTTTCGG-1 | GSM4626766 | Normal |
| GSM4626766_CGATGTATCGAATGGG-1  | GSM4626766 | Normal |
| GSM4626766_CGATTGAAGAGTACCG-1  | GSM4626766 | Normal |
| GSM4626766_CGATTGAAGGCCCTCA-1  | GSM4626766 | Normal |
| GSM4626766_CGATTGAAGTCGCCGT-1  | GSM4626766 | Normal |
| GSM4626766_CGATTGACAACTGTC-1   | GSM4626766 | Normal |
| GSM4626766_CGATTGACACAGTCGC-1  | GSM4626766 | Normal |
| GSM4626766_CGATTGACACATTTCT-1  | GSM4626766 | Normal |
| GSM4626766_CGATTGACACCGATAT-1  | GSM4626766 | Normal |
| GSM4626766_CGATTGACAGACGTAG-1  | GSM4626766 | Normal |
| GSM4626766_CGATTGACAGCTGCTG-1  | GSM4626766 | Normal |
| GSM4626766_CGATTGACATCACGAT-1  | GSM4626766 | Normal |
| GSM4626766_CGATTGACATCTGGTA-1  | GSM4626766 | Normal |
| GSM4626766_CGATTGATCAGTTCGA-1  | GSM4626766 | Normal |
| GSM4626766_CGCCAAGAGTAGGTGC-1  | GSM4626766 | Normal |
| GSM4626766_CGCCAAGAGTGCTGCC-1  | GSM4626766 | Normal |
| GSM4626766_CGCCAAGAGTGTCCAT-1  | GSM4626766 | Normal |
| GSM4626766_CGCCAAGAGTTAAGTG-1  | GSM4626766 | Normal |
| GSM4626766_CGCCAAGCAAACCTAC-1  | GSM4626766 | Normal |
| GSM4626766_CGCCAAGCAAGCGCTC-1  | GSM4626766 | Normal |
| GSM4626766_CGCCAAGCACACCGCA-1  | GSM4626766 | Normal |
| GSM4626766_CGCCAAGCACAGACAG-1  | GSM4626766 | Normal |
| GSM4626766_CGCCAAGCACAGACTT-1  | GSM4626766 | Normal |
| GSM4626766_CGCCAAGCACACGCTG-1  | GSM4626766 | Normal |
| GSM4626766_CGCCAAGCAGCATACT-1  | GSM4626766 | Normal |
| GSM4626766_CGCCAAGCAGCCACCA-1  | GSM4626766 | Normal |
| GSM4626766_CGCCAAGCAGGAATCG-1  | GSM4626766 | Normal |
| GSM4626766_CGCCAAGCAGTCGTGC-1  | GSM4626766 | Normal |
| GSM4626766_CGCCAAGGTCGCTTTC-1  | GSM4626766 | Normal |
| GSM4626766_CGCCAAGGTTGGAGGT-1  | GSM4626766 | Normal |
| GSM4626766_CGCCAAGTCCGTTGCT-1  | GSM4626766 | Normal |
| GSM4626766_CGCCAAGTCGTCCGTT-1  | GSM4626766 | Normal |

|                               |            |        |
|-------------------------------|------------|--------|
| GSM4626766_CGCGGTAAGCCATCGC-1 | GSM4626766 | Normal |
| GSM4626766_CGCGGTAAGGAATTAC-1 | GSM4626766 | Normal |
| GSM4626766_CGCGGTAAGGCAGGTT-1 | GSM4626766 | Normal |
| GSM4626766_CGCGGTACAGCCAATT-1 | GSM4626766 | Normal |
| GSM4626766_CGCGGTACAGGGTACA-1 | GSM4626766 | Normal |
| GSM4626766_CGCGGTAGTACAGTGG-1 | GSM4626766 | Normal |
| GSM4626766_CGCGGTAGTAGTAGTA-1 | GSM4626766 | Normal |
| GSM4626766_CGCGGTAGTCATTAGC-1 | GSM4626766 | Normal |
| GSM4626766_CGCGGTAGTGTGCTG-1  | GSM4626766 | Normal |
| GSM4626766_CGCGGTAGTTGACGTT-1 | GSM4626766 | Normal |
| GSM4626766_CGCGGTATCAACACCA-1 | GSM4626766 | Normal |
| GSM4626766_CGCGGTATCGGAGGTA-1 | GSM4626766 | Normal |
| GSM4626766_CGCGGTATCTTTAGTC-1 | GSM4626766 | Normal |
| GSM4626766_CGCGTTTAGATCCCAT-1 | GSM4626766 | Normal |
| GSM4626766_CGCGTTTCAACACCCG-1 | GSM4626766 | Normal |
| GSM4626766_CGCGTTTCACTTAAGC-1 | GSM4626766 | Normal |
| GSM4626766_CGCGTTTGTAAGTAGT-1 | GSM4626766 | Normal |
| GSM4626766_CGCGTTTGTATGCTTG-1 | GSM4626766 | Normal |
| GSM4626766_CGCGTTTGTCCGTTAA-1 | GSM4626766 | Normal |
| GSM4626766_CGCGTTTGTAAAGTAG-1 | GSM4626766 | Normal |
| GSM4626766_CGCGTTTTACGAAGG-1  | GSM4626766 | Normal |
| GSM4626766_CGCGTTTTCTTGCCA-1  | GSM4626766 | Normal |
| GSM4626766_CGCGTTTTCGGGAGTA-1 | GSM4626766 | Normal |
| GSM4626766_CGCGTTTTCGTTACGA-1 | GSM4626766 | Normal |
| GSM4626766_CGCGTTTTCTACTCAT-1 | GSM4626766 | Normal |
| GSM4626766_CGCGTTTTCTGATTCT-1 | GSM4626766 | Normal |
| GSM4626766_CGCTATCAGAATCTCC-1 | GSM4626766 | Normal |
| GSM4626766_CGCTATCAGGTGGGTT-1 | GSM4626766 | Normal |
| GSM4626766_CGCTATCCAAAGCAAT-1 | GSM4626766 | Normal |
| GSM4626766_CGCTATCGTCAGTGGA-1 | GSM4626766 | Normal |
| GSM4626766_CGCTATCGTTCTGGTA-1 | GSM4626766 | Normal |
| GSM4626766_CGCTATCGTTTGTTC-1  | GSM4626766 | Normal |
| GSM4626766_CGCTATCTCAAACGGG-1 | GSM4626766 | Normal |
| GSM4626766_CGCTATCTCAACGCTA-1 | GSM4626766 | Normal |
| GSM4626766_CGCTATCTCATTATCC-1 | GSM4626766 | Normal |
| GSM4626766_CGCTATCTCGTGTAGT-1 | GSM4626766 | Normal |
| GSM4626766_CGCTGGAAGACGACGT-1 | GSM4626766 | Normal |
| GSM4626766_CGCTGGAAGATGCCTT-1 | GSM4626766 | Normal |
| GSM4626766_CGCTGGAAGCGTAATA-1 | GSM4626766 | Normal |
| GSM4626766_CGCTGGAAGGCCCTCA-1 | GSM4626766 | Normal |
| GSM4626766_CGCTGGAAGTACGTAA-1 | GSM4626766 | Normal |
| GSM4626766_CGCTGGAAGTACGTTT-1 | GSM4626766 | Normal |
| GSM4626766_CGCTGGAAGTCATGCT-1 | GSM4626766 | Normal |
| GSM4626766_CGCTGGAAGTCCCACG-1 | GSM4626766 | Normal |
| GSM4626766_CGCTGGAAGTCCGTAT-1 | GSM4626766 | Normal |
| GSM4626766_CGCTGGAAGTGTTGAA-1 | GSM4626766 | Normal |
| GSM4626766_CGCTGGACAAACTGCT-1 | GSM4626766 | Normal |
| GSM4626766_CGCTGGACAATCAGAA-1 | GSM4626766 | Normal |
| GSM4626766_CGCTGGACACCGATAT-1 | GSM4626766 | Normal |
| GSM4626766_CGCTGGACACTCAGGC-1 | GSM4626766 | Normal |
| GSM4626766_CGCTGGACAGGTCCAC-1 | GSM4626766 | Normal |
| GSM4626766_CGCTGGAGTACCATCA-1 | GSM4626766 | Normal |
| GSM4626766_CGCTGGAGTGCCTGGT-1 | GSM4626766 | Normal |
| GSM4626766_CGCTGGATCATGTAGC-1 | GSM4626766 | Normal |
| GSM4626766_CGCTGGATCCAGATCA-1 | GSM4626766 | Normal |
| GSM4626766_CGCTTCAAGAATTGTG-1 | GSM4626766 | Normal |
| GSM4626766_CGCTTCAAGAGTCTGG-1 | GSM4626766 | Normal |

|                                |            |        |
|--------------------------------|------------|--------|
| GSM4626766_CGCTTCAAGCGTGAGT-1  | GSM4626766 | Normal |
| GSM4626766_CGCTTCACAAGGTTCT-1  | GSM4626766 | Normal |
| GSM4626766_CGCTTCACACGCGAAA-1  | GSM4626766 | Normal |
| GSM4626766_CGCTTCAGTATCGCAT-1  | GSM4626766 | Normal |
| GSM4626766_CGCTTCAGTCGGCATC-1  | GSM4626766 | Normal |
| GSM4626766_CGCTTCAGTCTCCACT-1  | GSM4626766 | Normal |
| GSM4626766_CGCTTCAGTGACGGTA-1  | GSM4626766 | Normal |
| GSM4626766_CGCTTCAGTTCAGACT-1  | GSM4626766 | Normal |
| GSM4626766_CGCTTCATCCGAAGAG-1  | GSM4626766 | Normal |
| GSM4626766_CGCTTCATCCGTTGCT-1  | GSM4626766 | Normal |
| GSM4626766_CGCTTCATCTTAGAGC-1  | GSM4626766 | Normal |
| GSM4626766_CGGACACAGCACCGCT-1  | GSM4626766 | Normal |
| GSM4626766_CGGACACAGCAGGCTA-1  | GSM4626766 | Normal |
| GSM4626766_CGGACACAGCTACCGC-1  | GSM4626766 | Normal |
| GSM4626766_CGGACACCAAGGACAC-1  | GSM4626766 | Normal |
| GSM4626766_CGGACACCAATCGGTT-1  | GSM4626766 | Normal |
| GSM4626766_CGGACACCATGCCCGA-1  | GSM4626766 | Normal |
| GSM4626766_CGGACACGTCACCTAA-1  | GSM4626766 | Normal |
| GSM4626766_CGGACACGTCATCCCT-1  | GSM4626766 | Normal |
| GSM4626766_CGGACACGTCCGAAGA-1  | GSM4626766 | Normal |
| GSM4626766_CGGACACGTGGTCCGT-1  | GSM4626766 | Normal |
| GSM4626766_CGGACACTCACCATAG-1  | GSM4626766 | Normal |
| GSM4626766_CGGACACTCCACGAAT-1  | GSM4626766 | Normal |
| GSM4626766_CGGACACTCGGCGCAT-1  | GSM4626766 | Normal |
| GSM4626766_CGGACACTCTCCAGGG-1  | GSM4626766 | Normal |
| GSM4626766_CGGACACTCTGGGCCA-1  | GSM4626766 | Normal |
| GSM4626766_CGGACACTCTGGTGTA-1  | GSM4626766 | Normal |
| GSM4626766_CGGACGTAGAGTAAGG-1  | GSM4626766 | Normal |
| GSM4626766_CGGACGTAGTAACCCT-1  | GSM4626766 | Normal |
| GSM4626766_CGGACGTCAATGGAAT-1  | GSM4626766 | Normal |
| GSM4626766_CGGACGTCACTTGGAT-1  | GSM4626766 | Normal |
| GSM4626766_CGGACGTATATACGC-1   | GSM4626766 | Normal |
| GSM4626766_CGGACGTATCGTCGG-1   | GSM4626766 | Normal |
| GSM4626766_CGGACGTATTTCGACA-1  | GSM4626766 | Normal |
| GSM4626766_CGGACGTGTCCAGTTA-1  | GSM4626766 | Normal |
| GSM4626766_CGGACGTGTCTCTTG-1   | GSM4626766 | Normal |
| GSM4626766_CGGACGTGTGCAACTT-1  | GSM4626766 | Normal |
| GSM4626766_CGGACGTGTGCACTTA-1  | GSM4626766 | Normal |
| GSM4626766_CGGACGTTCTTTACAC-1  | GSM4626766 | Normal |
| GSM4626766_CGGACTGAGCACCGTC-1  | GSM4626766 | Normal |
| GSM4626766_CGGACTGAGCCACTAT-1  | GSM4626766 | Normal |
| GSM4626766_CGGACTGAGCCATCGC-1  | GSM4626766 | Normal |
| GSM4626766_CGGACTGAGGAGTTTA-1  | GSM4626766 | Normal |
| GSM4626766_CGGACTGAGGATGGTC-1  | GSM4626766 | Normal |
| GSM4626766_CGGACTGAGGGCTCTC-1  | GSM4626766 | Normal |
| GSM4626766_CGGACTGCACGAAAGC-1  | GSM4626766 | Normal |
| GSM4626766_CGGACTGCACGAAATA-1  | GSM4626766 | Normal |
| GSM4626766_CGGACTGCACTTCGAA-1  | GSM4626766 | Normal |
| GSM4626766_CGGACTGGTATAAACG-1  | GSM4626766 | Normal |
| GSM4626766_CGGACTGTCCGCCAGCA-1 | GSM4626766 | Normal |
| GSM4626766_CGGACTGTCTAACCGA-1  | GSM4626766 | Normal |
| GSM4626766_CGGAGCTAGGCATTGG-1  | GSM4626766 | Normal |
| GSM4626766_CGGAGCTAGGCGTACA-1  | GSM4626766 | Normal |
| GSM4626766_CGGAGCTAGGTCATCT-1  | GSM4626766 | Normal |
| GSM4626766_CGGAGCTCACCACGTG-1  | GSM4626766 | Normal |
| GSM4626766_CGGAGCTCAGGAATCG-1  | GSM4626766 | Normal |
| GSM4626766_CGGAGCTGTAAACCTC-1  | GSM4626766 | Normal |

|                                |            |        |
|--------------------------------|------------|--------|
| GSM4626766_CGGAGCTGTGTTAAGA-1  | GSM4626766 | Normal |
| GSM4626766_CGGAGTCAGAAACCGC-1  | GSM4626766 | Normal |
| GSM4626766_CGGAGTCAGAGTACCG-1  | GSM4626766 | Normal |
| GSM4626766_CGGAGTCAGGCAAAGA-1  | GSM4626766 | Normal |
| GSM4626766_CGGAGTCCACCAGCAC-1  | GSM4626766 | Normal |
| GSM4626766_CGGAGTCCAGGGTATG-1  | GSM4626766 | Normal |
| GSM4626766_CGGAGTCGTACAAGTA-1  | GSM4626766 | Normal |
| GSM4626766_CGGAGTCGTACACCGC-1  | GSM4626766 | Normal |
| GSM4626766_CGGAGTCGTGGTTTCA-1  | GSM4626766 | Normal |
| GSM4626766_CGGAGTCTCCGTACAA-1  | GSM4626766 | Normal |
| GSM4626766_CGGCTAGAGACGCAAC-1  | GSM4626766 | Normal |
| GSM4626766_CGGCTAGAGATCGATA-1  | GSM4626766 | Normal |
| GSM4626766_CGGCTAGAGCGTCAAG-1  | GSM4626766 | Normal |
| GSM4626766_CGGCTAGAGCGTTTAC-1  | GSM4626766 | Normal |
| GSM4626766_CGGCTAGAGGCTCATT-1  | GSM4626766 | Normal |
| GSM4626766_CGGCTAGAGTGGTAGC-1  | GSM4626766 | Normal |
| GSM4626766_CGGCTAGCAAGCCAC-1   | GSM4626766 | Normal |
| GSM4626766_CGGCTAGCAATGGAGC-1  | GSM4626766 | Normal |
| GSM4626766_CGGCTAGCACACAGAG-1  | GSM4626766 | Normal |
| GSM4626766_CGGCTAGCAGGAACGT-1  | GSM4626766 | Normal |
| GSM4626766_CGGCTAGCAGTTAAC-1   | GSM4626766 | Normal |
| GSM4626766_CGGCTAGCATGGAATA-1  | GSM4626766 | Normal |
| GSM4626766_CGGCTAGGTCTAGTCA-1  | GSM4626766 | Normal |
| GSM4626766_CGGCTAGGTGTCGCTG-1  | GSM4626766 | Normal |
| GSM4626766_CGGCTAGGTTCTGGGCT-1 | GSM4626766 | Normal |
| GSM4626766_CGGCTAGGTTTAGCTG-1  | GSM4626766 | Normal |
| GSM4626766_CGGCTAGTCCAACCAA-1  | GSM4626766 | Normal |
| GSM4626766_CGGCTAGTCCTTGCCA-1  | GSM4626766 | Normal |
| GSM4626766_CGGCTAGTCTTCTGGC-1  | GSM4626766 | Normal |
| GSM4626766_CGGGTCAAGAGTAAGG-1  | GSM4626766 | Normal |
| GSM4626766_CGGGTCAAGCGGCTTC-1  | GSM4626766 | Normal |
| GSM4626766_CGGGTACACAAGACG-1   | GSM4626766 | Normal |
| GSM4626766_CGGGTACACGAAGCA-1   | GSM4626766 | Normal |
| GSM4626766_CGGGTCACTTAAGC-1    | GSM4626766 | Normal |
| GSM4626766_CGGGTACAGCCTATA-1   | GSM4626766 | Normal |
| GSM4626766_CGGGTCACTACTCAAC-1  | GSM4626766 | Normal |
| GSM4626766_CGGGTCACTCCATCCT-1  | GSM4626766 | Normal |
| GSM4626766_CGGGTCACTCCGAAGA-1  | GSM4626766 | Normal |
| GSM4626766_CGGGTCACTATCCCG-1   | GSM4626766 | Normal |
| GSM4626766_CGGTTAAAGAGACTTA-1  | GSM4626766 | Normal |
| GSM4626766_CGGTTAAAGATATACG-1  | GSM4626766 | Normal |
| GSM4626766_CGGTTAAAGCCAGTAG-1  | GSM4626766 | Normal |
| GSM4626766_CGGTTAAAGTACGCC-1   | GSM4626766 | Normal |
| GSM4626766_CGGTTAAACAATTCCTT-1 | GSM4626766 | Normal |
| GSM4626766_CGGTTAACACCATCCT-1  | GSM4626766 | Normal |
| GSM4626766_CGGTTAACAGCTGTTA-1  | GSM4626766 | Normal |
| GSM4626766_CGGTTAACAGTCGATT-1  | GSM4626766 | Normal |
| GSM4626766_CGGTTAACATTAGGCT-1  | GSM4626766 | Normal |
| GSM4626766_CGGTTAAGTAAATACG-1  | GSM4626766 | Normal |
| GSM4626766_CGGTTAAGTAAGTGTA-1  | GSM4626766 | Normal |
| GSM4626766_CGGTTAAGTTAAGAAC-1  | GSM4626766 | Normal |
| GSM4626766_CGGTTAATCGGACAAG-1  | GSM4626766 | Normal |
| GSM4626766_CGTAGCGAGACACGAC-1  | GSM4626766 | Normal |
| GSM4626766_CGTAGCGAGATGCGAC-1  | GSM4626766 | Normal |
| GSM4626766_CGTAGCGCAATCTGCA-1  | GSM4626766 | Normal |
| GSM4626766_CGTAGCGCAGCATGAG-1  | GSM4626766 | Normal |
| GSM4626766_CGTAGCGCATCAGTAC-1  | GSM4626766 | Normal |

|                               |            |        |
|-------------------------------|------------|--------|
| GSM4626766_CGTAGCGGTCGATTGT-1 | GSM4626766 | Normal |
| GSM4626766_CGTAGCGGTCTAAACC-1 | GSM4626766 | Normal |
| GSM4626766_CGTAGCGTCCGCTGTT-1 | GSM4626766 | Normal |
| GSM4626766_CGTAGCGTCGAATCCA-1 | GSM4626766 | Normal |
| GSM4626766_CGTAGGCAGAGCTTCT-1 | GSM4626766 | Normal |
| GSM4626766_CGTAGGCAGCAGGCTA-1 | GSM4626766 | Normal |
| GSM4626766_CGTAGGCCATCCTAGA-1 | GSM4626766 | Normal |
| GSM4626766_CGTAGGCCATCGTCGG-1 | GSM4626766 | Normal |
| GSM4626766_CGTAGGCCATCTCGCT-1 | GSM4626766 | Normal |
| GSM4626766_CGTAGGCGTAGGAGTC-1 | GSM4626766 | Normal |
| GSM4626766_CGTAGGCGTGGCAAAC-1 | GSM4626766 | Normal |
| GSM4626766_CGTAGGCTCCCAAGAT-1 | GSM4626766 | Normal |
| GSM4626766_CGTAGGCTCCGCGTTT-1 | GSM4626766 | Normal |
| GSM4626766_CGTAGGCTCCTGCTTG-1 | GSM4626766 | Normal |
| GSM4626766_CGTAGGCTCGCTTAGA-1 | GSM4626766 | Normal |
| GSM4626766_CGTCACTAGGGTTCCC-1 | GSM4626766 | Normal |
| GSM4626766_CGTCACTCAGGTTTCA-1 | GSM4626766 | Normal |
| GSM4626766_CGTCACTCATAACCTG-1 | GSM4626766 | Normal |
| GSM4626766_CGTCACTGTAGCGTCC-1 | GSM4626766 | Normal |
| GSM4626766_CGTCACTGTCTCTTG-1  | GSM4626766 | Normal |
| GSM4626766_CGTCACTGTGAGATG-1  | GSM4626766 | Normal |
| GSM4626766_CGTCACTGTGACTCAT-1 | GSM4626766 | Normal |
| GSM4626766_CGTCACTGTTGATTG-1  | GSM4626766 | Normal |
| GSM4626766_CGTCACTTCAGTTTCA-1 | GSM4626766 | Normal |
| GSM4626766_CGTCACTTCGGATGGA-1 | GSM4626766 | Normal |
| GSM4626766_CGTCACTTCGGGAGTA-1 | GSM4626766 | Normal |
| GSM4626766_CGTCACTTCGTACCGG-1 | GSM4626766 | Normal |
| GSM4626766_CGTCACTTCTCATTCA-1 | GSM4626766 | Normal |
| GSM4626766_CGTCACTTCTGGAGCC-1 | GSM4626766 | Normal |
| GSM4626766_CGTCACTTCTGTGCAA-1 | GSM4626766 | Normal |
| GSM4626766_CGTCAGGAGATAGTCA-1 | GSM4626766 | Normal |
| GSM4626766_CGTCAGGAGCCATCGC-1 | GSM4626766 | Normal |
| GSM4626766_CGTCAGGAGTCCATAC-1 | GSM4626766 | Normal |
| GSM4626766_CGTCAGGCATATGGTC-1 | GSM4626766 | Normal |
| GSM4626766_CGTCAGGGTACAGTGG-1 | GSM4626766 | Normal |
| GSM4626766_CGTCAGGGTACATGTC-1 | GSM4626766 | Normal |
| GSM4626766_CGTCAGGGTAGCGCTC-1 | GSM4626766 | Normal |
| GSM4626766_CGTCAGGGTAGGCTGA-1 | GSM4626766 | Normal |
| GSM4626766_CGTCAGGTCAAAGACA-1 | GSM4626766 | Normal |
| GSM4626766_CGTCCATAGCGTAGTG-1 | GSM4626766 | Normal |
| GSM4626766_CGTCCATCAAAGTGCG-1 | GSM4626766 | Normal |
| GSM4626766_CGTCCATCAATAGAGT-1 | GSM4626766 | Normal |
| GSM4626766_CGTCCATCACACAGAG-1 | GSM4626766 | Normal |
| GSM4626766_CGTCCATCACAGTCGC-1 | GSM4626766 | Normal |
| GSM4626766_CGTCCATCAGCTATTG-1 | GSM4626766 | Normal |
| GSM4626766_CGTCCATGTCCGTGAC-1 | GSM4626766 | Normal |
| GSM4626766_CGTCCATGTGTCTGAT-1 | GSM4626766 | Normal |
| GSM4626766_CGTCCATGTTAAGGGC-1 | GSM4626766 | Normal |
| GSM4626766_CGTCCATGTTATCCGA-1 | GSM4626766 | Normal |
| GSM4626766_CGTCCATGTTGGTAAA-1 | GSM4626766 | Normal |
| GSM4626766_CGTCCATTCCCGACTT-1 | GSM4626766 | Normal |
| GSM4626766_CGTCCATTGAGAACG-1  | GSM4626766 | Normal |
| GSM4626766_CGTCTACAGAATTGTG-1 | GSM4626766 | Normal |
| GSM4626766_CGTCTACAGACCGGAT-1 | GSM4626766 | Normal |
| GSM4626766_CGTCTACAGTATGACA-1 | GSM4626766 | Normal |
| GSM4626766_CGTCTACCACATTTCT-1 | GSM4626766 | Normal |
| GSM4626766_CGTCTACCACGGCCAT-1 | GSM4626766 | Normal |

|                                |            |        |
|--------------------------------|------------|--------|
| GSM4626766_CGTCTACCATAGAAAC-1  | GSM4626766 | Normal |
| GSM4626766_CGTCTACGTGAAATCA-1  | GSM4626766 | Normal |
| GSM4626766_CGTCTACTCTTGACGA-1  | GSM4626766 | Normal |
| GSM4626766_CGTGAGCAGACCTTTG-1  | GSM4626766 | Normal |
| GSM4626766_CGTGAGCAGTGGAGAA-1  | GSM4626766 | Normal |
| GSM4626766_CGTGAGCCAAAGCGGT-1  | GSM4626766 | Normal |
| GSM4626766_CGTGAGCCAATCACAC-1  | GSM4626766 | Normal |
| GSM4626766_CGTGAGCCACAGTCGC-1  | GSM4626766 | Normal |
| GSM4626766_CGTGAGCCACATGTGT-1  | GSM4626766 | Normal |
| GSM4626766_CGTGAGCCAGCGATCC-1  | GSM4626766 | Normal |
| GSM4626766_CGTGAGCCAGCGTCCA-1  | GSM4626766 | Normal |
| GSM4626766_CGTGAGCGTAAGGGAA-1  | GSM4626766 | Normal |
| GSM4626766_CGTGAGCGTACAGCAG-1  | GSM4626766 | Normal |
| GSM4626766_CGTGAGCGTCTAGAGG-1  | GSM4626766 | Normal |
| GSM4626766_CGTGAGCTCAACACAC-1  | GSM4626766 | Normal |
| GSM4626766_CGTGAGCTCGGATGGA-1  | GSM4626766 | Normal |
| GSM4626766_CGTGAGCTCGTACGGC-1  | GSM4626766 | Normal |
| GSM4626766_CGTGTAAAGACAGAGA-1  | GSM4626766 | Normal |
| GSM4626766_CGTGTAAAGCGTCTAT-1  | GSM4626766 | Normal |
| GSM4626766_CGTGTAAAGCGTTGCC-1  | GSM4626766 | Normal |
| GSM4626766_CGTGTAAAGTCCGGTC-1  | GSM4626766 | Normal |
| GSM4626766_CGTGTAAACAAGGTGTG-1 | GSM4626766 | Normal |
| GSM4626766_CGTGTAAACAATGGAAT-1 | GSM4626766 | Normal |
| GSM4626766_CGTGTAAAGTACACCGC-1 | GSM4626766 | Normal |
| GSM4626766_CGTGTAAAGTAGCTTGT-1 | GSM4626766 | Normal |
| GSM4626766_CGTGTAAAGTCCGTCAG-1 | GSM4626766 | Normal |
| GSM4626766_CGTGTAAAGTGACGGTA-1 | GSM4626766 | Normal |
| GSM4626766_CGTGTAAAGTTAGTGGG-1 | GSM4626766 | Normal |
| GSM4626766_CGTGTAAATCACAATGC-1 | GSM4626766 | Normal |
| GSM4626766_CGTGTAAATCCTCTAGC-1 | GSM4626766 | Normal |
| GSM4626766_CGTGTAAATCGCCCTTA-1 | GSM4626766 | Normal |
| GSM4626766_CGTGTAAATCTGATACG-1 | GSM4626766 | Normal |
| GSM4626766_CGTGTCTAGACACTAA-1  | GSM4626766 | Normal |
| GSM4626766_CGTGTCTAGCTTATCG-1  | GSM4626766 | Normal |
| GSM4626766_CGTGTCTAGTATCTCG-1  | GSM4626766 | Normal |
| GSM4626766_CGTGTCTCAAGTTCTG-1  | GSM4626766 | Normal |
| GSM4626766_CGTGTCTCACACCGAC-1  | GSM4626766 | Normal |
| GSM4626766_CGTGTCTGTGCTTTTC-1  | GSM4626766 | Normal |
| GSM4626766_CGTGTCTGTCTAGCGC-1  | GSM4626766 | Normal |
| GSM4626766_CGTGTCTTCAGATAAG-1  | GSM4626766 | Normal |
| GSM4626766_CGTGTCTTCTTCGGTC-1  | GSM4626766 | Normal |
| GSM4626766_CGTTAGAAGACAGACC-1  | GSM4626766 | Normal |
| GSM4626766_CGTTAGAAGAGTCTGG-1  | GSM4626766 | Normal |
| GSM4626766_CGTTAGAAGTGTACGG-1  | GSM4626766 | Normal |
| GSM4626766_CGTTAGACAGCTGTTA-1  | GSM4626766 | Normal |
| GSM4626766_CGTTAGAGTACCCAAT-1  | GSM4626766 | Normal |
| GSM4626766_CGTTAGAGTCTCACCT-1  | GSM4626766 | Normal |
| GSM4626766_CGTTAGAGTGGTAACG-1  | GSM4626766 | Normal |
| GSM4626766_CGTTAGATCCATGAAC-1  | GSM4626766 | Normal |
| GSM4626766_CGTTAGATCCCTCTTT-1  | GSM4626766 | Normal |
| GSM4626766_CGTTAGATCCTGCAGG-1  | GSM4626766 | Normal |
| GSM4626766_CGTTAGATCGACGGAA-1  | GSM4626766 | Normal |
| GSM4626766_CGTTAGATCTAACGGT-1  | GSM4626766 | Normal |
| GSM4626766_CGTTCTGAGAAGGCCT-1  | GSM4626766 | Normal |
| GSM4626766_CGTTCTGAGCCAGAAC-1  | GSM4626766 | Normal |
| GSM4626766_CGTTCTGAGCTCCCAG-1  | GSM4626766 | Normal |
| GSM4626766_CGTTCTGCACATCCAA-1  | GSM4626766 | Normal |

|                                |            |        |
|--------------------------------|------------|--------|
| GSM4626766_CGTTCTGCACGGTGTC-1  | GSM4626766 | Normal |
| GSM4626766_CGTTCTGCAGGATCGA-1  | GSM4626766 | Normal |
| GSM4626766_CGTTCTGGTACTTCTT-1  | GSM4626766 | Normal |
| GSM4626766_CGTTCTGGTGGCTCCA-1  | GSM4626766 | Normal |
| GSM4626766_CGTTCTGGTTCCACTC-1  | GSM4626766 | Normal |
| GSM4626766_CGTTCTGTCACCGGGT-1  | GSM4626766 | Normal |
| GSM4626766_CGTTCTGTGCGATGAGG-1 | GSM4626766 | Normal |
| GSM4626766_CGTTCTGTCTACTCAT-1  | GSM4626766 | Normal |
| GSM4626766_CGTTCTGTCTTCATGT-1  | GSM4626766 | Normal |
| GSM4626766_CGTTGGGAGAAAGTGG-1  | GSM4626766 | Normal |
| GSM4626766_CGTTGGGCAACACCTA-1  | GSM4626766 | Normal |
| GSM4626766_CGTTGGGCAACTGCGC-1  | GSM4626766 | Normal |
| GSM4626766_CGTTGGGCAAGAAAGG-1  | GSM4626766 | Normal |
| GSM4626766_CGTTGGGCAAGAGGCT-1  | GSM4626766 | Normal |
| GSM4626766_CGTTGGGCACCTCGGA-1  | GSM4626766 | Normal |
| GSM4626766_CGTTGGGGTCAAATC-1   | GSM4626766 | Normal |
| GSM4626766_CGTTGGGGTCAAGACA-1  | GSM4626766 | Normal |
| GSM4626766_CGTTGGGGTCTGATCA-1  | GSM4626766 | Normal |
| GSM4626766_CGTTGGGGTGGGACA-1   | GSM4626766 | Normal |
| GSM4626766_CGTTGGGTCACTTACT-1  | GSM4626766 | Normal |
| GSM4626766_CGTTGGGTCCTTTCGG-1  | GSM4626766 | Normal |
| GSM4626766_CGTTGGGTGTTTAGG-1   | GSM4626766 | Normal |
| GSM4626766_CTAAGTACAGGAT-1     | GSM4626766 | Normal |
| GSM4626766_CTAAGTACAGTAC-1     | GSM4626766 | Normal |
| GSM4626766_CTAAGTACAGTACGCC-1  | GSM4626766 | Normal |
| GSM4626766_CTAAGTACAGTACGG-1   | GSM4626766 | Normal |
| GSM4626766_CTAAGTACAGCAATT-1   | GSM4626766 | Normal |
| GSM4626766_CTAAGTACCAATTCTA-1  | GSM4626766 | Normal |
| GSM4626766_CTAAGTACTACTATC-1   | GSM4626766 | Normal |
| GSM4626766_CTAAGACAGAGTCTGG-1  | GSM4626766 | Normal |
| GSM4626766_CTAAGACAGCAGGCTA-1  | GSM4626766 | Normal |
| GSM4626766_CTAAGACAGCGAGAAA-1  | GSM4626766 | Normal |
| GSM4626766_CTAAGACCAGACAAAT-1  | GSM4626766 | Normal |
| GSM4626766_CTAAGACCAGTGAGTG-1  | GSM4626766 | Normal |
| GSM4626766_CTAAGACCAGTTCATG-1  | GSM4626766 | Normal |
| GSM4626766_CTAAGACGTAGAGTGC-1  | GSM4626766 | Normal |
| GSM4626766_CTAAGACGTAGATTAG-1  | GSM4626766 | Normal |
| GSM4626766_CTAAGACGTATCACCA-1  | GSM4626766 | Normal |
| GSM4626766_CTAAGACGTATGGTTC-1  | GSM4626766 | Normal |
| GSM4626766_CTAAGACGTGACGCCT-1  | GSM4626766 | Normal |
| GSM4626766_CTAAGACGTGGCTCCA-1  | GSM4626766 | Normal |
| GSM4626766_CTAAGACTCAAGGCTT-1  | GSM4626766 | Normal |
| GSM4626766_CTAAGACTCCTAAGTG-1  | GSM4626766 | Normal |
| GSM4626766_CTAAGACTCTAACCGA-1  | GSM4626766 | Normal |
| GSM4626766_CTAAGACTCTTCTGGC-1  | GSM4626766 | Normal |
| GSM4626766_CTAATGGAGCCGGTAA-1  | GSM4626766 | Normal |
| GSM4626766_CTAATGGAGCTTATCG-1  | GSM4626766 | Normal |
| GSM4626766_CTAATGGACGACTCG-1   | GSM4626766 | Normal |
| GSM4626766_CTAATGGGTACCATCA-1  | GSM4626766 | Normal |
| GSM4626766_CTAATGGGTCAAAGAT-1  | GSM4626766 | Normal |
| GSM4626766_CTAATGGGTGAGTTT-1   | GSM4626766 | Normal |
| GSM4626766_CTAATGGGTCTTCTCG-1  | GSM4626766 | Normal |
| GSM4626766_CTAATGGGTGTCGCG-1   | GSM4626766 | Normal |
| GSM4626766_CTAATGGTCCGACTA-1   | GSM4626766 | Normal |
| GSM4626766_CTAATGGTCCAATGGT-1  | GSM4626766 | Normal |
| GSM4626766_CTAATGGTCCGTACC-1   | GSM4626766 | Normal |
| GSM4626766_CTAATGGTCCGAATCT-1  | GSM4626766 | Normal |



|                                |            |        |
|--------------------------------|------------|--------|
| GSM4626766_CTAATGGTCGGTAAAC-1  | GSM4626766 | Normal |
| GSM4626766_CTACACCAGAGGTTGC-1  | GSM4626766 | Normal |
| GSM4626766_CTACACCAGATCCGAG-1  | GSM4626766 | Normal |
| GSM4626766_CTACACCAGTCCTCCT-1  | GSM4626766 | Normal |
| GSM4626766_CTACACCAGTGTCCAT-1  | GSM4626766 | Normal |
| GSM4626766_CTACACCGTATTCTCT-1  | GSM4626766 | Normal |
| GSM4626766_CTACACCGTCTTCGTC-1  | GSM4626766 | Normal |
| GSM4626766_CTACACCGTGTTAAGA-1  | GSM4626766 | Normal |
| GSM4626766_CTACACCGTTTGTTTC-1  | GSM4626766 | Normal |
| GSM4626766_CTACACCTCCCCTTG-1   | GSM4626766 | Normal |
| GSM4626766_CTACACCTCTGTCTCG-1  | GSM4626766 | Normal |
| GSM4626766_CTACATTAGAATAGGG-1  | GSM4626766 | Normal |
| GSM4626766_CTACATTAGCGATTCT-1  | GSM4626766 | Normal |
| GSM4626766_CTACATTAGTACTTGC-1  | GSM4626766 | Normal |
| GSM4626766_CTACATTAGTGTTAGA-1  | GSM4626766 | Normal |
| GSM4626766_CTACATTCAAGCCTAT-1  | GSM4626766 | Normal |
| GSM4626766_CTACATTCAGACGCAA-1  | GSM4626766 | Normal |
| GSM4626766_CTACATTCAGCTGTTA-1  | GSM4626766 | Normal |
| GSM4626766_CTACATTCATTGGCGC-1  | GSM4626766 | Normal |
| GSM4626766_CTACATTGTCTCTCTG-1  | GSM4626766 | Normal |
| GSM4626766_CTACATTGTCTGGAGA-1  | GSM4626766 | Normal |
| GSM4626766_CTACATTTTCAGAGACG-1 | GSM4626766 | Normal |
| GSM4626766_CTACATTTCTTAACCT-1  | GSM4626766 | Normal |
| GSM4626766_CTACATTTCTTGATC-1   | GSM4626766 | Normal |
| GSM4626766_CTACCCAAGCATGGCA-1  | GSM4626766 | Normal |
| GSM4626766_CTACCCAAGGAATCGC-1  | GSM4626766 | Normal |
| GSM4626766_CTACCCACAGCAGTTT-1  | GSM4626766 | Normal |
| GSM4626766_CTACCCACAGCCAATT-1  | GSM4626766 | Normal |
| GSM4626766_CTACCCACATCGATGT-1  | GSM4626766 | Normal |
| GSM4626766_CTACCCAGTAAGGGCT-1  | GSM4626766 | Normal |
| GSM4626766_CTACCCAGTCGAGATG-1  | GSM4626766 | Normal |
| GSM4626766_CTACCCAGTTCGTCTC-1  | GSM4626766 | Normal |
| GSM4626766_CTACCCATCAACCATG-1  | GSM4626766 | Normal |
| GSM4626766_CTACCCATCATGTCCC-1  | GSM4626766 | Normal |
| GSM4626766_CTACCCATCCTCAATT-1  | GSM4626766 | Normal |
| GSM4626766_CTACCCATCCTTTCTC-1  | GSM4626766 | Normal |
| GSM4626766_CTACCCATCGTTACAG-1  | GSM4626766 | Normal |
| GSM4626766_CTACGTCAGGTGCTTT-1  | GSM4626766 | Normal |
| GSM4626766_CTACGTCAGTGGAGT-1   | GSM4626766 | Normal |
| GSM4626766_CTACGTCGTAGCGCAA-1  | GSM4626766 | Normal |
| GSM4626766_CTACGTCGTCAGAAGC-1  | GSM4626766 | Normal |
| GSM4626766_CTACGTCGTCCCTACT-1  | GSM4626766 | Normal |
| GSM4626766_CTACGTCGTGCCTGCA-1  | GSM4626766 | Normal |
| GSM4626766_CTACGTCGTGTCTGAT-1  | GSM4626766 | Normal |
| GSM4626766_CTACGTCGTTACCTC-1   | GSM4626766 | Normal |
| GSM4626766_CTACGTCTCAGTTAGC-1  | GSM4626766 | Normal |
| GSM4626766_CTACGTCTCCGATATG-1  | GSM4626766 | Normal |
| GSM4626766_CTACGTCTCGATGAGG-1  | GSM4626766 | Normal |
| GSM4626766_CTACGTCTCGGCATCG-1  | GSM4626766 | Normal |
| GSM4626766_CTACGTCTCTTTCCTC-1  | GSM4626766 | Normal |
| GSM4626766_CTAGAGTAGTCAAGCG-1  | GSM4626766 | Normal |
| GSM4626766_CTAGAGTCAAAGCGGT-1  | GSM4626766 | Normal |
| GSM4626766_CTAGAGTCACGCCAT-1   | GSM4626766 | Normal |
| GSM4626766_CTAGAGTCAGAGTGTG-1  | GSM4626766 | Normal |
| GSM4626766_CTAGAGTTCAACACGT-1  | GSM4626766 | Normal |
| GSM4626766_CTAGAGTTCAATCACG-1  | GSM4626766 | Normal |
| GSM4626766_CTAGAGTTCTGCGTAA-1  | GSM4626766 | Normal |

|                               |            |        |
|-------------------------------|------------|--------|
| GSM4626766_CTAGCCTAGCACACAG-1 | GSM4626766 | Normal |
| GSM4626766_CTAGCCTAGCGCTCCA-1 | GSM4626766 | Normal |
| GSM4626766_CTAGCCTAGCTCCTCT-1 | GSM4626766 | Normal |
| GSM4626766_CTAGCCTAGTTCCACA-1 | GSM4626766 | Normal |
| GSM4626766_CTAGCCTCAGCTCCGA-1 | GSM4626766 | Normal |
| GSM4626766_CTAGCCTCATCCTTGC-1 | GSM4626766 | Normal |
| GSM4626766_CTAGCCTGTTTAAGCC-1 | GSM4626766 | Normal |
| GSM4626766_CTAGCCTTCATCGCTC-1 | GSM4626766 | Normal |
| GSM4626766_CTAGCCTTCATTGCGA-1 | GSM4626766 | Normal |
| GSM4626766_CTAGCCTTCCGCGGTA-1 | GSM4626766 | Normal |
| GSM4626766_CTAGCCTTCGCGTAGC-1 | GSM4626766 | Normal |
| GSM4626766_CTAGCCTTCTGATTCT-1 | GSM4626766 | Normal |
| GSM4626766_CTAGTGACACCGAATT-1 | GSM4626766 | Normal |
| GSM4626766_CTAGTGACACTGTTAG-1 | GSM4626766 | Normal |
| GSM4626766_CTAGTGACAGACAAGC-1 | GSM4626766 | Normal |
| GSM4626766_CTAGTGAGTAGCGTGA-1 | GSM4626766 | Normal |
| GSM4626766_CTAGTGAGTCAAAGCG-1 | GSM4626766 | Normal |
| GSM4626766_CTAGTGAGTGACAAAT-1 | GSM4626766 | Normal |
| GSM4626766_CTAGTGAGTTCCGGCA-1 | GSM4626766 | Normal |
| GSM4626766_CTAGTGATCCACGTTT-1 | GSM4626766 | Normal |
| GSM4626766_CTAGTGATCCCTAATT-1 | GSM4626766 | Normal |
| GSM4626766_CTAGTGATCCGTCATC-1 | GSM4626766 | Normal |
| GSM4626766_CTAGTGATCCGTTGCT-1 | GSM4626766 | Normal |
| GSM4626766_CTAGTGATCTGTGCAA-1 | GSM4626766 | Normal |
| GSM4626766_CTCACACAGAACAATC-1 | GSM4626766 | Normal |
| GSM4626766_CTCACACAGGTGCTTT-1 | GSM4626766 | Normal |
| GSM4626766_CTCACACAGGTGGGTT-1 | GSM4626766 | Normal |
| GSM4626766_CTCACACAGTATTGGA-1 | GSM4626766 | Normal |
| GSM4626766_CTCACACAGTGGTAGC-1 | GSM4626766 | Normal |
| GSM4626766_CTCACACAGTTATCGC-1 | GSM4626766 | Normal |
| GSM4626766_CTCACACCAAACGCGA-1 | GSM4626766 | Normal |
| GSM4626766_CTCACACCAAGAGGCT-1 | GSM4626766 | Normal |
| GSM4626766_CTCACACCAATTCCTT-1 | GSM4626766 | Normal |
| GSM4626766_CTCACACCAGGCAGTA-1 | GSM4626766 | Normal |
| GSM4626766_CTCACACCATATGAGA-1 | GSM4626766 | Normal |
| GSM4626766_CTCACACGTACGAAAT-1 | GSM4626766 | Normal |
| GSM4626766_CTCACACGTAGCTGCC-1 | GSM4626766 | Normal |
| GSM4626766_CTCACACGTCTCACCT-1 | GSM4626766 | Normal |
| GSM4626766_CTCACACGTCTTCTCG-1 | GSM4626766 | Normal |
| GSM4626766_CTCACACTCCACGAAT-1 | GSM4626766 | Normal |
| GSM4626766_CTCACACTCCTTTACA-1 | GSM4626766 | Normal |
| GSM4626766_CTCACACTCTGCCAGG-1 | GSM4626766 | Normal |
| GSM4626766_CTCACACTCTGGCGTG-1 | GSM4626766 | Normal |
| GSM4626766_CTCAGAAAGAAACGCC-1 | GSM4626766 | Normal |
| GSM4626766_CTCAGAAAGCACGCCT-1 | GSM4626766 | Normal |
| GSM4626766_CTCAGAAAGGATGCGT-1 | GSM4626766 | Normal |
| GSM4626766_CTCAGAAAGGCGATAC-1 | GSM4626766 | Normal |
| GSM4626766_CTCAGAAAGTGGAGAA-1 | GSM4626766 | Normal |
| GSM4626766_CTCAGAACAACGCGA-1  | GSM4626766 | Normal |
| GSM4626766_CTCAGAACAAGAATC-1  | GSM4626766 | Normal |
| GSM4626766_CTCAGAACATATACCG-1 | GSM4626766 | Normal |
| GSM4626766_CTCAGAAGTACAGTTC-1 | GSM4626766 | Normal |
| GSM4626766_CTCAGAAGTCAACATC-1 | GSM4626766 | Normal |
| GSM4626766_CTCAGAAGTGACGCCT-1 | GSM4626766 | Normal |
| GSM4626766_CTCAGAAGTGGACGAT-1 | GSM4626766 | Normal |
| GSM4626766_CTCAGAATCAGTTTGG-1 | GSM4626766 | Normal |
| GSM4626766_CTCAGAATCTGTACGA-1 | GSM4626766 | Normal |

|                                |            |        |
|--------------------------------|------------|--------|
| GSM4626766_CTCATTAAGCGTTTAC-1  | GSM4626766 | Normal |
| GSM4626766_CTCATTAAGGAGTTTA-1  | GSM4626766 | Normal |
| GSM4626766_CTCATTAGTAAGTGTA-1  | GSM4626766 | Normal |
| GSM4626766_CTCATTAGTACCGTTA-1  | GSM4626766 | Normal |
| GSM4626766_CTCATTAGTAGAGCTG-1  | GSM4626766 | Normal |
| GSM4626766_CTCATTAGTATGCTTG-1  | GSM4626766 | Normal |
| GSM4626766_CTCATTAGTCAATACC-1  | GSM4626766 | Normal |
| GSM4626766_CTCATTAGTCCAGTAT-1  | GSM4626766 | Normal |
| GSM4626766_CTCATTAGTCGGATCC-1  | GSM4626766 | Normal |
| GSM4626766_CTCATTAGTCGTCTTC-1  | GSM4626766 | Normal |
| GSM4626766_CTCATTAGTCTGATCA-1  | GSM4626766 | Normal |
| GSM4626766_CTCATTAGTGTTAAGA-1  | GSM4626766 | Normal |
| GSM4626766_CTCATTATCACCACCT-1  | GSM4626766 | Normal |
| GSM4626766_CTCCTAGAGTGTTTGC-1  | GSM4626766 | Normal |
| GSM4626766_CTCCTAGAGTTACCCA-1  | GSM4626766 | Normal |
| GSM4626766_CTCCTAGCACTTAACG-1  | GSM4626766 | Normal |
| GSM4626766_CTCCTAGCAGGCAGTA-1  | GSM4626766 | Normal |
| GSM4626766_CTCCTAGGTGGCAAAC-1  | GSM4626766 | Normal |
| GSM4626766_CTCCTAGGTGGTCTCG-1  | GSM4626766 | Normal |
| GSM4626766_CTCCTAGGTTGCGCAC-1  | GSM4626766 | Normal |
| GSM4626766_CTCCTAGTCGCCCTTA-1  | GSM4626766 | Normal |
| GSM4626766_CTCCTAGTCGCCGTGA-1  | GSM4626766 | Normal |
| GSM4626766_CTCCTAGTCGCGGATC-1  | GSM4626766 | Normal |
| GSM4626766_CTCCTAGTCGTACGG-1   | GSM4626766 | Normal |
| GSM4626766_CTCCTAGTCGTGGTTCG-1 | GSM4626766 | Normal |
| GSM4626766_CTCCTAGTCTCCGGTT-1  | GSM4626766 | Normal |
| GSM4626766_CTCGAAAAGGAGTTGC-1  | GSM4626766 | Normal |
| GSM4626766_CTCGAAAAGTACCGGA-1  | GSM4626766 | Normal |
| GSM4626766_CTCGAAAAGTGTCCAT-1  | GSM4626766 | Normal |
| GSM4626766_CTCGAAACAGATTGCT-1  | GSM4626766 | Normal |
| GSM4626766_CTCGAAAAGTGGGTCAA-1 | GSM4626766 | Normal |
| GSM4626766_CTCGAAATCCGATATG-1  | GSM4626766 | Normal |
| GSM4626766_CTCGAGGAGACAGGCT-1  | GSM4626766 | Normal |
| GSM4626766_CTCGAGGAGACGCACA-1  | GSM4626766 | Normal |
| GSM4626766_CTCGAGGAGGAGTCTG-1  | GSM4626766 | Normal |
| GSM4626766_CTCGAGGAGGATGTAT-1  | GSM4626766 | Normal |
| GSM4626766_CTCGAGGAGTAGCGGT-1  | GSM4626766 | Normal |
| GSM4626766_CTCGAGGAGTCAAGGC-1  | GSM4626766 | Normal |
| GSM4626766_CTCGAGGAGTCCAGGA-1  | GSM4626766 | Normal |
| GSM4626766_CTCGAGGAGTCGCCGT-1  | GSM4626766 | Normal |
| GSM4626766_CTCGAGGCACGGTGTC-1  | GSM4626766 | Normal |
| GSM4626766_CTCGAGGCATCACCT-1   | GSM4626766 | Normal |
| GSM4626766_CTCGAGGCATGCCTTC-1  | GSM4626766 | Normal |
| GSM4626766_CTCGAGGCATTGACA-1   | GSM4626766 | Normal |
| GSM4626766_CTCGAGGGTGGTACAG-1  | GSM4626766 | Normal |
| GSM4626766_CTCGAGGGTGTCTGAT-1  | GSM4626766 | Normal |
| GSM4626766_CTCGAGGTCACGATGT-1  | GSM4626766 | Normal |
| GSM4626766_CTCGAGGTCAGTCCCT-1  | GSM4626766 | Normal |
| GSM4626766_CTCGAGGTCGAATCCA-1  | GSM4626766 | Normal |
| GSM4626766_CTCGAGGTCGAGCCCA-1  | GSM4626766 | Normal |
| GSM4626766_CTCGAGGTCGGAACG-1   | GSM4626766 | Normal |
| GSM4626766_CTCGAGGTCGGTCCGA-1  | GSM4626766 | Normal |
| GSM4626766_CTCGAGGTCGGTGTTA-1  | GSM4626766 | Normal |
| GSM4626766_CTCGAGGTCCTCAAGTG-1 | GSM4626766 | Normal |
| GSM4626766_CTCGGAGAGGATGCGT-1  | GSM4626766 | Normal |
| GSM4626766_CTCGGAGAGGCATTGG-1  | GSM4626766 | Normal |
| GSM4626766_CTCGGAGAGGGCACTA-1  | GSM4626766 | Normal |

|                               |            |        |
|-------------------------------|------------|--------|
| GSM4626766_CTCGGAGCAAGAGTCG-1 | GSM4626766 | Normal |
| GSM4626766_CTCGGAGCATCACGTA-1 | GSM4626766 | Normal |
| GSM4626766_CTCGGAGGTACCGTAT-1 | GSM4626766 | Normal |
| GSM4626766_CTCGGAGGTGCACTTA-1 | GSM4626766 | Normal |
| GSM4626766_CTCGGAGGTGCAGACA-1 | GSM4626766 | Normal |
| GSM4626766_CTCGGAGGTTGTCGCG-1 | GSM4626766 | Normal |
| GSM4626766_CTCGGAGGTTTGTTTC-1 | GSM4626766 | Normal |
| GSM4626766_CTCGGAGTCTGCGTAA-1 | GSM4626766 | Normal |
| GSM4626766_CTCGGGAAGAAACCAT-1 | GSM4626766 | Normal |
| GSM4626766_CTCGGGAAGAGTCGGT-1 | GSM4626766 | Normal |
| GSM4626766_CTCGGGAAGGAGTTTA-1 | GSM4626766 | Normal |
| GSM4626766_CTCGGGAAGGGTGTGT-1 | GSM4626766 | Normal |
| GSM4626766_CTCGGGAGTCGTCTTC-1 | GSM4626766 | Normal |
| GSM4626766_CTCGGGAGTTCAGGCC-1 | GSM4626766 | Normal |
| GSM4626766_CTCGGGATCAGTCAGT-1 | GSM4626766 | Normal |
| GSM4626766_CTCGGGATCTCTAGGA-1 | GSM4626766 | Normal |
| GSM4626766_CTCGGGATCTGCGGCA-1 | GSM4626766 | Normal |
| GSM4626766_CTCGTACAGAGTACAT-1 | GSM4626766 | Normal |
| GSM4626766_CTCGTACAGCAGGCTA-1 | GSM4626766 | Normal |
| GSM4626766_CTCGTACAGGCCCGTT-1 | GSM4626766 | Normal |
| GSM4626766_CTCGTACAGGCTAGCA-1 | GSM4626766 | Normal |
| GSM4626766_CTCGTACCAAGCGAGT-1 | GSM4626766 | Normal |
| GSM4626766_CTCGTACCACCTCGGA-1 | GSM4626766 | Normal |
| GSM4626766_CTCGTACGTACGACCC-1 | GSM4626766 | Normal |
| GSM4626766_CTCGTACGTACTTCTT-1 | GSM4626766 | Normal |
| GSM4626766_CTCGTACGTATGCTTG-1 | GSM4626766 | Normal |
| GSM4626766_CTCGTACGTGGCGAAT-1 | GSM4626766 | Normal |
| GSM4626766_CTCGTACGTTGGACCC-1 | GSM4626766 | Normal |
| GSM4626766_CTCGTACGTTTGTTGG-1 | GSM4626766 | Normal |
| GSM4626766_CTCGTACTCCAACCAA-1 | GSM4626766 | Normal |
| GSM4626766_CTCGTACTCGGCGGTT-1 | GSM4626766 | Normal |
| GSM4626766_CTCGTACTCGTATCAG-1 | GSM4626766 | Normal |
| GSM4626766_CTCGTCAAGAGAGCTC-1 | GSM4626766 | Normal |
| GSM4626766_CTCGTCAAGCCCTAAT-1 | GSM4626766 | Normal |
| GSM4626766_CTCGTCAAGTGGTAGC-1 | GSM4626766 | Normal |
| GSM4626766_CTCGTCAAGTTACCCA-1 | GSM4626766 | Normal |
| GSM4626766_CTCGTCACAAGGACTG-1 | GSM4626766 | Normal |
| GSM4626766_CTCGTCACACTATCTT-1 | GSM4626766 | Normal |
| GSM4626766_CTCGTCACATCGGACC-1 | GSM4626766 | Normal |
| GSM4626766_CTCGTCAGTCACACGC-1 | GSM4626766 | Normal |
| GSM4626766_CTCGTCAGTGACAAAT-1 | GSM4626766 | Normal |
| GSM4626766_CTCGTCAGTGAGGGAG-1 | GSM4626766 | Normal |
| GSM4626766_CTCGTCAGTGTCAATC-1 | GSM4626766 | Normal |
| GSM4626766_CTCGTCAGTTAAAGTG-1 | GSM4626766 | Normal |
| GSM4626766_CTCGTCAGTTGGAGGT-1 | GSM4626766 | Normal |
| GSM4626766_CTCGTCATCAAGCCTA-1 | GSM4626766 | Normal |
| GSM4626766_CTCGTCATCGACGGAA-1 | GSM4626766 | Normal |
| GSM4626766_CTCGTCATCTGATTCT-1 | GSM4626766 | Normal |
| GSM4626766_CTCGTCATCTGTCTCG-1 | GSM4626766 | Normal |
| GSM4626766_CTCTAATAGATCCCGC-1 | GSM4626766 | Normal |
| GSM4626766_CTCTAATAGCGTGAAC-1 | GSM4626766 | Normal |
| GSM4626766_CTCTAATAGTTAGGTA-1 | GSM4626766 | Normal |
| GSM4626766_CTCTAATCACGTCAGC-1 | GSM4626766 | Normal |
| GSM4626766_CTCTAATCACTTCGAA-1 | GSM4626766 | Normal |
| GSM4626766_CTCTAATCAGCGTAAG-1 | GSM4626766 | Normal |
| GSM4626766_CTCTAATGTATATCCG-1 | GSM4626766 | Normal |
| GSM4626766_CTCTAATGTTTGCGC-1  | GSM4626766 | Normal |

|                                 |            |        |
|---------------------------------|------------|--------|
| GSM4626766_CTCTAATTC AATCTCT-1  | GSM4626766 | Normal |
| GSM4626766_CTCTAATTCAGTACGT-1   | GSM4626766 | Normal |
| GSM4626766_CTCTAATTCGCAGGCT-1   | GSM4626766 | Normal |
| GSM4626766_CTCTAATTTCTCTGTCTG-1 | GSM4626766 | Normal |
| GSM4626766_CTCTACGAGAGCTATA-1   | GSM4626766 | Normal |
| GSM4626766_CTCTACGAGAGGTTAT-1   | GSM4626766 | Normal |
| GSM4626766_CTCTACGCAAAGTCAA-1   | GSM4626766 | Normal |
| GSM4626766_CTCTACGCAGGCAGTA-1   | GSM4626766 | Normal |
| GSM4626766_CTCTACGCATGCCTTC-1   | GSM4626766 | Normal |
| GSM4626766_CTCTACGGTACTTCTT-1   | GSM4626766 | Normal |
| GSM4626766_CTCTACGGTCCATCCT-1   | GSM4626766 | Normal |
| GSM4626766_CTCTACGGTCCCTTGT-1   | GSM4626766 | Normal |
| GSM4626766_CTCTACGGTCCGACGT-1   | GSM4626766 | Normal |
| GSM4626766_CTCTACGGTCGCTTCT-1   | GSM4626766 | Normal |
| GSM4626766_CTCTACGGTGACTACT-1   | GSM4626766 | Normal |
| GSM4626766_CTCTACGGTGATGTCT-1   | GSM4626766 | Normal |
| GSM4626766_CTCTACGGTGCGATAG-1   | GSM4626766 | Normal |
| GSM4626766_CTCTACGTCATCACCC-1   | GSM4626766 | Normal |
| GSM4626766_CTCTGGTAGATGCGAC-1   | GSM4626766 | Normal |
| GSM4626766_CTCTGGTAGCCCAGCT-1   | GSM4626766 | Normal |
| GSM4626766_CTCTGGTAGGCAGTCA-1   | GSM4626766 | Normal |
| GSM4626766_CTCTGGTCAATGAATG-1   | GSM4626766 | Normal |
| GSM4626766_CTCTGGTCACTTAACG-1   | GSM4626766 | Normal |
| GSM4626766_CTCTGGTCATTCTGC-1    | GSM4626766 | Normal |
| GSM4626766_CTCTGGTGTAAGTAGT-1   | GSM4626766 | Normal |
| GSM4626766_CTCTGGTGACACCGC-1    | GSM4626766 | Normal |
| GSM4626766_CTCTGGTGTAAGTGAAT-1  | GSM4626766 | Normal |
| GSM4626766_CTCTGGTGTTAAGTAG-1   | GSM4626766 | Normal |
| GSM4626766_CTCTGGTGTTACCGAT-1   | GSM4626766 | Normal |
| GSM4626766_CTCTGGTTCATGCATG-1   | GSM4626766 | Normal |
| GSM4626766_CTCTGGTTCGGAAGAG-1   | GSM4626766 | Normal |
| GSM4626766_CTCTGGTTCGCATGGC-1   | GSM4626766 | Normal |
| GSM4626766_CTGAAACAGGAGTAGA-1   | GSM4626766 | Normal |
| GSM4626766_CTGAAACCACGAGGTA-1   | GSM4626766 | Normal |
| GSM4626766_CTGAAACCATCCAACA-1   | GSM4626766 | Normal |
| GSM4626766_CTGAAACCATTGTGCA-1   | GSM4626766 | Normal |
| GSM4626766_CTGAAACGTA TTTCTT-1  | GSM4626766 | Normal |
| GSM4626766_CTGAAACGTATGGTTC-1   | GSM4626766 | Normal |
| GSM4626766_CTGAAACGTGAACCTT-1   | GSM4626766 | Normal |
| GSM4626766_CTGAAACGTTCCGGCA-1   | GSM4626766 | Normal |
| GSM4626766_CTGAAACTCCCACTTG-1   | GSM4626766 | Normal |
| GSM4626766_CTGAAACTCGGCATCG-1   | GSM4626766 | Normal |
| GSM4626766_CTGAAACTCGTCTGCT-1   | GSM4626766 | Normal |
| GSM4626766_CTGAAGTAGAGACGAA-1   | GSM4626766 | Normal |
| GSM4626766_CTGAAGTAGCAGACTG-1   | GSM4626766 | Normal |
| GSM4626766_CTGAAGTAGTGGGCTA-1   | GSM4626766 | Normal |
| GSM4626766_CTGAAGTCAACTGCTA-1   | GSM4626766 | Normal |
| GSM4626766_CTGAAGTCACCTCGTT-1   | GSM4626766 | Normal |
| GSM4626766_CTGAAGTCACGCTTTC-1   | GSM4626766 | Normal |
| GSM4626766_CTGAAGTCAGGGTACA-1   | GSM4626766 | Normal |
| GSM4626766_CTGAAGTCAGTATGCT-1   | GSM4626766 | Normal |
| GSM4626766_CTGAAGTCATATGCTG-1   | GSM4626766 | Normal |
| GSM4626766_CTGAAGTCATCGACGC-1   | GSM4626766 | Normal |
| GSM4626766_CTGAAGTCATGTCCTC-1   | GSM4626766 | Normal |
| GSM4626766_CTGAAGTGTATATGGA-1   | GSM4626766 | Normal |
| GSM4626766_CTGAAGTGT CAGATAA-1  | GSM4626766 | Normal |
| GSM4626766_CTGAAGTGTCTGGTCTG-1  | GSM4626766 | Normal |

|                               |            |        |
|-------------------------------|------------|--------|
| GSM4626766_CTGAAGTGTGTCCTCT-1 | GSM4626766 | Normal |
| GSM4626766_CTGAAGTGTGTTTGGT-1 | GSM4626766 | Normal |
| GSM4626766_CTGAAGTGTGTTTGGT-1 | GSM4626766 | Normal |
| GSM4626766_CTGAAGTTCATCTGTT-1 | GSM4626766 | Normal |
| GSM4626766_CTGAAGTTCCCGGATG-1 | GSM4626766 | Normal |
| GSM4626766_CTGAAGTTCGCCAAAT-1 | GSM4626766 | Normal |
| GSM4626766_CTGATAGAGCACAGGT-1 | GSM4626766 | Normal |
| GSM4626766_CTGATAGAGTAATCCC-1 | GSM4626766 | Normal |
| GSM4626766_CTGATAGCAATCACAC-1 | GSM4626766 | Normal |
| GSM4626766_CTGATAGCAGGCAGTA-1 | GSM4626766 | Normal |
| GSM4626766_CTGATAGCATATACCG-1 | GSM4626766 | Normal |
| GSM4626766_CTGATAGCATCGATGT-1 | GSM4626766 | Normal |
| GSM4626766_CTGATAGGTGAACCTT-1 | GSM4626766 | Normal |
| GSM4626766_CTGATAGGTGTTCTTT-1 | GSM4626766 | Normal |
| GSM4626766_CTGATAGGTTCTGTTT-1 | GSM4626766 | Normal |
| GSM4626766_CTGATAGGTTGGTAAA-1 | GSM4626766 | Normal |
| GSM4626766_CTGATAGGTTTCGCTC-1 | GSM4626766 | Normal |
| GSM4626766_CTGATAGTCAGTTTGG-1 | GSM4626766 | Normal |
| GSM4626766_CTGATAGTCCACGAAT-1 | GSM4626766 | Normal |
| GSM4626766_CTGATAGTCGCGGATC-1 | GSM4626766 | Normal |
| GSM4626766_CTGATAGTCGTCACGG-1 | GSM4626766 | Normal |
| GSM4626766_CTGATCCAGAAACCAT-1 | GSM4626766 | Normal |
| GSM4626766_CTGATCCAGGATGGTC-1 | GSM4626766 | Normal |
| GSM4626766_CTGATCCCAAGTACCT-1 | GSM4626766 | Normal |
| GSM4626766_CTGATCCCAGCCTTTC-1 | GSM4626766 | Normal |
| GSM4626766_CTGATCCGTCTAGCGC-1 | GSM4626766 | Normal |
| GSM4626766_CTGATCCTCCGCATAA-1 | GSM4626766 | Normal |
| GSM4626766_CTGCCTAAGAGCCCAA-1 | GSM4626766 | Normal |
| GSM4626766_CTGCCTAAGCAGATCG-1 | GSM4626766 | Normal |
| GSM4626766_CTGCCTACAATCCAAC-1 | GSM4626766 | Normal |
| GSM4626766_CTGCCTACACGTCAGC-1 | GSM4626766 | Normal |
| GSM4626766_CTGCCTACACTCTGTC-1 | GSM4626766 | Normal |
| GSM4626766_CTGCCTACAGCTATTG-1 | GSM4626766 | Normal |
| GSM4626766_CTGCCTACATCCAACA-1 | GSM4626766 | Normal |
| GSM4626766_CTGCCTAGTAAGAGGA-1 | GSM4626766 | Normal |
| GSM4626766_CTGCCTAGTCCATGAT-1 | GSM4626766 | Normal |
| GSM4626766_CTGCCTATCACCGGGT-1 | GSM4626766 | Normal |
| GSM4626766_CTGCCTATCGAGCCCA-1 | GSM4626766 | Normal |
| GSM4626766_CTGCCTATCTCCTATA-1 | GSM4626766 | Normal |
| GSM4626766_CTGCCTATCTGAAAGA-1 | GSM4626766 | Normal |
| GSM4626766_CTGCGGAAGCAGGCTA-1 | GSM4626766 | Normal |
| GSM4626766_CTGCGGAAGCTGAACG-1 | GSM4626766 | Normal |
| GSM4626766_CTGCGGAAGTAGCCGA-1 | GSM4626766 | Normal |
| GSM4626766_CTGCGGACAAACCTAC-1 | GSM4626766 | Normal |
| GSM4626766_CTGCGGACAGAAGCAC-1 | GSM4626766 | Normal |
| GSM4626766_CTGCGGACATTGACA-1  | GSM4626766 | Normal |
| GSM4626766_CTGCGGAGTTGAACTC-1 | GSM4626766 | Normal |
| GSM4626766_CTGCGGATCATAGCAC-1 | GSM4626766 | Normal |
| GSM4626766_CTGCGGATCTCTGAGA-1 | GSM4626766 | Normal |
| GSM4626766_CTGCGGATCTGTCTAT-1 | GSM4626766 | Normal |
| GSM4626766_CTGCTGTAGCTAGCCC-1 | GSM4626766 | Normal |
| GSM4626766_CTGCTGTCAATCGGTT-1 | GSM4626766 | Normal |
| GSM4626766_CTGCTGTCAGCTTAAC-1 | GSM4626766 | Normal |
| GSM4626766_CTGCTGTCAGGTTTCA-1 | GSM4626766 | Normal |
| GSM4626766_CTGCTGTCAGTGAGTG-1 | GSM4626766 | Normal |
| GSM4626766_CTGCTGTGTAACGCG-1  | GSM4626766 | Normal |
| GSM4626766_CTGCTGTGTACCTACA-1 | GSM4626766 | Normal |

|                                |            |        |
|--------------------------------|------------|--------|
| GSM4626766_CTGCTGTGTAGCGTCC-1  | GSM4626766 | Normal |
| GSM4626766_CTGCTGTGTATCTGCA-1  | GSM4626766 | Normal |
| GSM4626766_CTGCTGTGTCAAAGCG-1  | GSM4626766 | Normal |
| GSM4626766_CTGCTGTGTGCGTTTC-1  | GSM4626766 | Normal |
| GSM4626766_CTGCTGTGTGATAAGT-1  | GSM4626766 | Normal |
| GSM4626766_CTGCTGTTCCCTCAGT-1  | GSM4626766 | Normal |
| GSM4626766_CTGCTGTTCCGAGGCT-1  | GSM4626766 | Normal |
| GSM4626766_CTGGTCTAGAAGGCCT-1  | GSM4626766 | Normal |
| GSM4626766_CTGGTCTAGTGCGTGA-1  | GSM4626766 | Normal |
| GSM4626766_CTGGTCTCAATAGAGT-1  | GSM4626766 | Normal |
| GSM4626766_CTGGTCTCACCTCGGA-1  | GSM4626766 | Normal |
| GSM4626766_CTGGTCTCAGCATGAG-1  | GSM4626766 | Normal |
| GSM4626766_CTGGTCTTCATATCGG-1  | GSM4626766 | Normal |
| GSM4626766_CTGGTCTTCCACGCAG-1  | GSM4626766 | Normal |
| GSM4626766_CTGGTCTTCTCGAGTA-1  | GSM4626766 | Normal |
| GSM4626766_CTGTGCTAGAGCCTAG-1  | GSM4626766 | Normal |
| GSM4626766_CTGTGCTAGCTACCGC-1  | GSM4626766 | Normal |
| GSM4626766_CTGTGCTAGTAGGTGC-1  | GSM4626766 | Normal |
| GSM4626766_CTGTGCTCACTGAAGG-1  | GSM4626766 | Normal |
| GSM4626766_CTGTGCTCATGGGACA-1  | GSM4626766 | Normal |
| GSM4626766_CTGTGCTCATGGTTGT-1  | GSM4626766 | Normal |
| GSM4626766_CTGTGCTGTTACAGAA-1  | GSM4626766 | Normal |
| GSM4626766_CTGTGCTTCCCTTGTG-1  | GSM4626766 | Normal |
| GSM4626766_CTGTGCTTCTCAACTT-1  | GSM4626766 | Normal |
| GSM4626766_CTGTGCTTCTTCAACT-1  | GSM4626766 | Normal |
| GSM4626766_CTGTTTAAGAGCAATT-1  | GSM4626766 | Normal |
| GSM4626766_CTGTTTAAGAGGTTGC-1  | GSM4626766 | Normal |
| GSM4626766_CTGTTTAAGCCAACAG-1  | GSM4626766 | Normal |
| GSM4626766_CTGTTTAAGGCTAGAC-1  | GSM4626766 | Normal |
| GSM4626766_CTGTTTAAGTAGCGGT-1  | GSM4626766 | Normal |
| GSM4626766_CTGTTTAAGTAGTGC-1   | GSM4626766 | Normal |
| GSM4626766_CTGTTTAAGTGGAGAA-1  | GSM4626766 | Normal |
| GSM4626766_CTGTTTACAACGCACC-1  | GSM4626766 | Normal |
| GSM4626766_CTGTTTACAAGGACAC-1  | GSM4626766 | Normal |
| GSM4626766_CTGTTTACACTTACGA-1  | GSM4626766 | Normal |
| GSM4626766_CTGTTTACATGATCCA-1  | GSM4626766 | Normal |
| GSM4626766_CTGTTTAGTAGAGCTG-1  | GSM4626766 | Normal |
| GSM4626766_CTGTTTAGTAGCTAAA-1  | GSM4626766 | Normal |
| GSM4626766_CTGTTTAGTGACCAAG-1  | GSM4626766 | Normal |
| GSM4626766_CTGTTTATCAAGGCTT-1  | GSM4626766 | Normal |
| GSM4626766_CTGTTTATCACTATTC-1  | GSM4626766 | Normal |
| GSM4626766_CTGTTTATCAGCGATT-1  | GSM4626766 | Normal |
| GSM4626766_CTGTTTATCTTCGGTC-1  | GSM4626766 | Normal |
| GSM4626766_CTTAACTAGGATGGTC-1  | GSM4626766 | Normal |
| GSM4626766_CTTAACTCAAAGTGCG-1  | GSM4626766 | Normal |
| GSM4626766_CTTAACTCAATGGACG-1  | GSM4626766 | Normal |
| GSM4626766_CTTAACTGTATTCGTG-1  | GSM4626766 | Normal |
| GSM4626766_CTTAACTTCCACGTGG-1  | GSM4626766 | Normal |
| GSM4626766_CTTAACTTCCGAAGAG-1  | GSM4626766 | Normal |
| GSM4626766_CTTAACTTCCCTAAGTG-1 | GSM4626766 | Normal |
| GSM4626766_CTTAACTTCCCTATTCA-1 | GSM4626766 | Normal |
| GSM4626766_CTTAACTTCCCTGTAGA-1 | GSM4626766 | Normal |
| GSM4626766_CTTAACTTCGCCCTTA-1  | GSM4626766 | Normal |
| GSM4626766_CTTAACTTCGGAGGTA-1  | GSM4626766 | Normal |
| GSM4626766_CTTAACTTCGGCGCTA-1  | GSM4626766 | Normal |
| GSM4626766_CTTAACTTCTCGAGTA-1  | GSM4626766 | Normal |
| GSM4626766_CTTACCGAGGCACATG-1  | GSM4626766 | Normal |

|                                |            |        |
|--------------------------------|------------|--------|
| GSM4626766_CTTACCGAGGGAAACA-1  | GSM4626766 | Normal |
| GSM4626766_CTTACCGCACACGTT-1   | GSM4626766 | Normal |
| GSM4626766_CTTACCGCACACAGAG-1  | GSM4626766 | Normal |
| GSM4626766_CTTACCGCACTAAGTC-1  | GSM4626766 | Normal |
| GSM4626766_CTTACCGCACTGTTAG-1  | GSM4626766 | Normal |
| GSM4626766_CTTACCGGTAAGCACG-1  | GSM4626766 | Normal |
| GSM4626766_CTTACCGGTAAGGATT-1  | GSM4626766 | Normal |
| GSM4626766_CTTACCGTCTACCAGA-1  | GSM4626766 | Normal |
| GSM4626766_CTTACCGTCTGCGGCA-1  | GSM4626766 | Normal |
| GSM4626766_CTTAGGAAGCGTCAAG-1  | GSM4626766 | Normal |
| GSM4626766_CTTAGGAAGGGAGTAA-1  | GSM4626766 | Normal |
| GSM4626766_CTTAGGAAGTCACGCC-1  | GSM4626766 | Normal |
| GSM4626766_CTTAGGACACCATCCT-1  | GSM4626766 | Normal |
| GSM4626766_CTTAGGACAGACAAGC-1  | GSM4626766 | Normal |
| GSM4626766_CTTAGGACATATACCG-1  | GSM4626766 | Normal |
| GSM4626766_CTTAGGAGTAAGTGTA-1  | GSM4626766 | Normal |
| GSM4626766_CTTAGGAGTAGCGTCC-1  | GSM4626766 | Normal |
| GSM4626766_CTTAGGAGTGAGTATA-1  | GSM4626766 | Normal |
| GSM4626766_CTTAGGATCGGAAATA-1  | GSM4626766 | Normal |
| GSM4626766_CTTAGGATCGTTGCCT-1  | GSM4626766 | Normal |
| GSM4626766_CTTAGGATCTTAGCCC-1  | GSM4626766 | Normal |
| GSM4626766_CTTCTCTAGCACCGCT-1  | GSM4626766 | Normal |
| GSM4626766_CTTCTCTAGCCTATGT-1  | GSM4626766 | Normal |
| GSM4626766_CTTCTCTCAACACCCG-1  | GSM4626766 | Normal |
| GSM4626766_CTTCTCTCAACGCACC-1  | GSM4626766 | Normal |
| GSM4626766_CTTCTCTCAAGTTCT-1   | GSM4626766 | Normal |
| GSM4626766_CTTCTCTCACCACCAG-1  | GSM4626766 | Normal |
| GSM4626766_CTTCTCTCACCATGTA-1  | GSM4626766 | Normal |
| GSM4626766_CTTCTCTGTTCCAGCGC-1 | GSM4626766 | Normal |
| GSM4626766_CTTCTCTGTTGGGACA-1  | GSM4626766 | Normal |
| GSM4626766_CTTCTCTGTTTAGGAA-1  | GSM4626766 | Normal |
| GSM4626766_CTTCTCTTCCAGCTCGG-1 | GSM4626766 | Normal |
| GSM4626766_CTTCTCTTCCAGAAGG-1  | GSM4626766 | Normal |
| GSM4626766_CTTCTCTTCCGAATGT-1  | GSM4626766 | Normal |
| GSM4626766_CTTGGCTAGCAGGTCA-1  | GSM4626766 | Normal |
| GSM4626766_CTTGGCTAGGGTTCGAT-1 | GSM4626766 | Normal |
| GSM4626766_CTTGGCTCAATGGATA-1  | GSM4626766 | Normal |
| GSM4626766_CTTGGCTCACCACCAG-1  | GSM4626766 | Normal |
| GSM4626766_CTTGGCTCATATGAGA-1  | GSM4626766 | Normal |
| GSM4626766_CTTGGCTGTTACAGAA-1  | GSM4626766 | Normal |
| GSM4626766_CTTGGCTTCCAGTTAGC-1 | GSM4626766 | Normal |
| GSM4626766_CTTGGCTTCCAAGAT-1   | GSM4626766 | Normal |
| GSM4626766_CTTGGCTTCGCTAGCG-1  | GSM4626766 | Normal |
| GSM4626766_CTTTGCAGAGAAACCGC-1 | GSM4626766 | Normal |
| GSM4626766_CTTTGCAGAGACCACC-1  | GSM4626766 | Normal |
| GSM4626766_CTTTGCAGAGCCACGCT-1 | GSM4626766 | Normal |
| GSM4626766_CTTTGCAGAGACGCTC-1  | GSM4626766 | Normal |
| GSM4626766_CTTTGCAGAGCTGCTG-1  | GSM4626766 | Normal |
| GSM4626766_CTTTGCAGAGGGTACA-1  | GSM4626766 | Normal |
| GSM4626766_CTTTGCAGGTACAAGTA-1 | GSM4626766 | Normal |
| GSM4626766_CTTTGCAGGTCTTGATG-1 | GSM4626766 | Normal |
| GSM4626766_CTTTGCAGTCCACGCAG-1 | GSM4626766 | Normal |
| GSM4626766_CTTTGCAGTCGCTAGCG-1 | GSM4626766 | Normal |
| GSM4626766_CTTTGCAGTCGGAGGTA-1 | GSM4626766 | Normal |
| GSM4626766_CTTTGCAGTCGTCTGCT-1 | GSM4626766 | Normal |
| GSM4626766_GAAACTCCAAGTCTGT-1  | GSM4626766 | Normal |
| GSM4626766_GAAACTCCAATCTGCA-1  | GSM4626766 | Normal |



|                               |            |        |
|-------------------------------|------------|--------|
| GSM4626766_GAAACTCCACCATGTA-1 | GSM4626766 | Normal |
| GSM4626766_GAAACTCCACCGGAAA-1 | GSM4626766 | Normal |
| GSM4626766_GAAACTCCATTAACCG-1 | GSM4626766 | Normal |
| GSM4626766_GAAACTCGTATTCGTG-1 | GSM4626766 | Normal |
| GSM4626766_GAAACTCGTCAAAGCG-1 | GSM4626766 | Normal |
| GSM4626766_GAAACTCGTCCCTTGT-1 | GSM4626766 | Normal |
| GSM4626766_GAAACTCGTCTCAACA-1 | GSM4626766 | Normal |
| GSM4626766_GAAACTCGTTGGGACA-1 | GSM4626766 | Normal |
| GSM4626766_GAAACTCTCAAAGACA-1 | GSM4626766 | Normal |
| GSM4626766_GAAACTCTCACCAGGC-1 | GSM4626766 | Normal |
| GSM4626766_GAAACTCTCATCTGCC-1 | GSM4626766 | Normal |
| GSM4626766_GAAACTCTCATTCACT-1 | GSM4626766 | Normal |
| GSM4626766_GAAACTCTCCAACCAA-1 | GSM4626766 | Normal |
| GSM4626766_GAAACTCTCTCGTTTA-1 | GSM4626766 | Normal |
| GSM4626766_GAAATGAAGAGAACAG-1 | GSM4626766 | Normal |
| GSM4626766_GAAATGAAGCTGCGAA-1 | GSM4626766 | Normal |
| GSM4626766_GAAATGAAGGAATTAC-1 | GSM4626766 | Normal |
| GSM4626766_GAAATGAAGTGACTCT-1 | GSM4626766 | Normal |
| GSM4626766_GAAATGACAGGGTTAG-1 | GSM4626766 | Normal |
| GSM4626766_GAAATGACATCACGAT-1 | GSM4626766 | Normal |
| GSM4626766_GAAATGACATGCCACG-1 | GSM4626766 | Normal |
| GSM4626766_GAAATGAGTAGATTAG-1 | GSM4626766 | Normal |
| GSM4626766_GAAATGAGTGCACTTA-1 | GSM4626766 | Normal |
| GSM4626766_GAAATGAGTGGACGAT-1 | GSM4626766 | Normal |
| GSM4626766_GAAATGAGTTCACGGC-1 | GSM4626766 | Normal |
| GSM4626766_GAAATGATCGAGAACG-1 | GSM4626766 | Normal |
| GSM4626766_GAACATCAGTAGGCCA-1 | GSM4626766 | Normal |
| GSM4626766_GAACATCAGTCAAGCG-1 | GSM4626766 | Normal |
| GSM4626766_GAACATCCAATGACCT-1 | GSM4626766 | Normal |
| GSM4626766_GAACATCCACGACTCG-1 | GSM4626766 | Normal |
| GSM4626766_GAACATCGTCCGAAGA-1 | GSM4626766 | Normal |
| GSM4626766_GAACATCGTCCGACGT-1 | GSM4626766 | Normal |
| GSM4626766_GAACATCGTGAAAGAG-1 | GSM4626766 | Normal |
| GSM4626766_GAACATCGTGTTAAGA-1 | GSM4626766 | Normal |
| GSM4626766_GAACATCGTTAAAGTG-1 | GSM4626766 | Normal |
| GSM4626766_GAACATCGTTCACAA-1  | GSM4626766 | Normal |
| GSM4626766_GAACATCTCACTCTTA-1 | GSM4626766 | Normal |
| GSM4626766_GAACATCTCATACGGT-1 | GSM4626766 | Normal |
| GSM4626766_GAACATCTCATGTAGC-1 | GSM4626766 | Normal |
| GSM4626766_GAACATCTCCGCGTTT-1 | GSM4626766 | Normal |
| GSM4626766_GAACATCTCGTTACAG-1 | GSM4626766 | Normal |
| GSM4626766_GAACCTAAGCTTCGCG-1 | GSM4626766 | Normal |
| GSM4626766_GAACCTAAGTGCGTGA-1 | GSM4626766 | Normal |
| GSM4626766_GAACCTACAAGTCTGT-1 | GSM4626766 | Normal |
| GSM4626766_GAACCTACAGATTGCT-1 | GSM4626766 | Normal |
| GSM4626766_GAACCTAGTTGGGACA-1 | GSM4626766 | Normal |
| GSM4626766_GAACCTATCAGCCTAA-1 | GSM4626766 | Normal |
| GSM4626766_GAACCTATCCTAGGGC-1 | GSM4626766 | Normal |
| GSM4626766_GAACGGAAGAGAGCTC-1 | GSM4626766 | Normal |
| GSM4626766_GAACGGAAGATCACGG-1 | GSM4626766 | Normal |
| GSM4626766_GAACGGAAGCTACCTA-1 | GSM4626766 | Normal |
| GSM4626766_GAACGGAAGGACCACA-1 | GSM4626766 | Normal |
| GSM4626766_GAACGGAGTATCGCAT-1 | GSM4626766 | Normal |
| GSM4626766_GAACGGAGTCTAGTGT-1 | GSM4626766 | Normal |
| GSM4626766_GAACGGAGTGTGCGTC-1 | GSM4626766 | Normal |
| GSM4626766_GAACGGATCACCATAG-1 | GSM4626766 | Normal |
| GSM4626766_GAACGGATCAGCTCTC-1 | GSM4626766 | Normal |

|                                |            |        |
|--------------------------------|------------|--------|
| GSM4626766_GAACGGATCAGGCAAG-1  | GSM4626766 | Normal |
| GSM4626766_GAACGGATCCACTGGG-1  | GSM4626766 | Normal |
| GSM4626766_GAACGGATCCCTTGTG-1  | GSM4626766 | Normal |
| GSM4626766_GAACGGATCGCAGGCT-1  | GSM4626766 | Normal |
| GSM4626766_GAACGGATCTGAGTGT-1  | GSM4626766 | Normal |
| GSM4626766_GAAGCAGAGGGATACC-1  | GSM4626766 | Normal |
| GSM4626766_GAAGCAGAGTTGTAGA-1  | GSM4626766 | Normal |
| GSM4626766_GAAGCAGCAGCCACCA-1  | GSM4626766 | Normal |
| GSM4626766_GAAGCAGCAGCTGCAC-1  | GSM4626766 | Normal |
| GSM4626766_GAAGCAGGTACAGACG-1  | GSM4626766 | Normal |
| GSM4626766_GAAGCAGGTACCGTAT-1  | GSM4626766 | Normal |
| GSM4626766_GAAGCAGGTATATCCG-1  | GSM4626766 | Normal |
| GSM4626766_GAAGCAGGTCTAGCCG-1  | GSM4626766 | Normal |
| GSM4626766_GAAGCAGGTCTAGCGC-1  | GSM4626766 | Normal |
| GSM4626766_GAAGCAGGTGTTTGTG-1  | GSM4626766 | Normal |
| GSM4626766_GAAGCAGGTTAGGGTG-1  | GSM4626766 | Normal |
| GSM4626766_GAAGCAGTCCACGAAT-1  | GSM4626766 | Normal |
| GSM4626766_GAAGCAGTCGCCATAA-1  | GSM4626766 | Normal |
| GSM4626766_GAAGCAGTCGGAGGTA-1  | GSM4626766 | Normal |
| GSM4626766_GAAGCAGTCGTTACAG-1  | GSM4626766 | Normal |
| GSM4626766_GAATAAGAGAAACCTA-1  | GSM4626766 | Normal |
| GSM4626766_GAATAAGAGCAGACTG-1  | GSM4626766 | Normal |
| GSM4626766_GAATAAGAGGCCGAAT-1  | GSM4626766 | Normal |
| GSM4626766_GAATAAGCACTTCTGC-1  | GSM4626766 | Normal |
| GSM4626766_GAATAAGCAGCGAACA-1  | GSM4626766 | Normal |
| GSM4626766_GAATAAGCAGCTGGCT-1  | GSM4626766 | Normal |
| GSM4626766_GAATAAGCAGGGTATG-1  | GSM4626766 | Normal |
| GSM4626766_GAATAAGGTAAAGTCA-1  | GSM4626766 | Normal |
| GSM4626766_GAATAAGGTCTCTTTA-1  | GSM4626766 | Normal |
| GSM4626766_GAATAAGGTCTGGAGA-1  | GSM4626766 | Normal |
| GSM4626766_GAATAAGGTGAGGGAG-1  | GSM4626766 | Normal |
| GSM4626766_GAATAAGTCAAACAAG-1  | GSM4626766 | Normal |
| GSM4626766_GAATAAGTCGGTGTGCG-1 | GSM4626766 | Normal |
| GSM4626766_GAATAAGTCGTTGACA-1  | GSM4626766 | Normal |
| GSM4626766_GAATGAAAGAGCCTAG-1  | GSM4626766 | Normal |
| GSM4626766_GAATGAAAGAGTCTGG-1  | GSM4626766 | Normal |
| GSM4626766_GAATGAAAGCGTAGTG-1  | GSM4626766 | Normal |
| GSM4626766_GAATGAACAAACGCGA-1  | GSM4626766 | Normal |
| GSM4626766_GAATGAACAGTCAGCC-1  | GSM4626766 | Normal |
| GSM4626766_GAATGAATCATCTGCC-1  | GSM4626766 | Normal |
| GSM4626766_GAATGAATCCTTTACA-1  | GSM4626766 | Normal |
| GSM4626766_GACACGCAGAGAACAG-1  | GSM4626766 | Normal |
| GSM4626766_GACACGCAGAGTAAGG-1  | GSM4626766 | Normal |
| GSM4626766_GACACGCAGGACACCA-1  | GSM4626766 | Normal |
| GSM4626766_GACACGCAGGAGTAGA-1  | GSM4626766 | Normal |
| GSM4626766_GACACGCAGGCGACAT-1  | GSM4626766 | Normal |
| GSM4626766_GACACGCCAAGCTGTT-1  | GSM4626766 | Normal |
| GSM4626766_GACACGCCAGGAACGT-1  | GSM4626766 | Normal |
| GSM4626766_GACACGCCAGTGGGAT-1  | GSM4626766 | Normal |
| GSM4626766_GACACGCCATTCTCAT-1  | GSM4626766 | Normal |
| GSM4626766_GACACGCGTAACGTTT-1  | GSM4626766 | Normal |
| GSM4626766_GACACGCGTACTTACA-1  | GSM4626766 | Normal |
| GSM4626766_GACACGCGTACTTAGC-1  | GSM4626766 | Normal |
| GSM4626766_GACACGCGTCCATCCT-1  | GSM4626766 | Normal |
| GSM4626766_GACACGCTCCTTGACC-1  | GSM4626766 | Normal |
| GSM4626766_GACAGAGAGCGCTCCA-1  | GSM4626766 | Normal |
| GSM4626766_GACAGAGAGGCCATAG-1  | GSM4626766 | Normal |

|                                |            |        |
|--------------------------------|------------|--------|
| GSM4626766_GACAGAGAGTTAGCGG-1  | GSM4626766 | Normal |
| GSM4626766_GACAGAGCAAGCGCTC-1  | GSM4626766 | Normal |
| GSM4626766_GACAGAGCAATGGATA-1  | GSM4626766 | Normal |
| GSM4626766_GACAGAGCACATTCGA-1  | GSM4626766 | Normal |
| GSM4626766_GACAGAGCAGTAGAGC-1  | GSM4626766 | Normal |
| GSM4626766_GACAGAGGTATTCGTG-1  | GSM4626766 | Normal |
| GSM4626766_GACAGAGGTCCATGAT-1  | GSM4626766 | Normal |
| GSM4626766_GACAGAGTCAGTTAGC-1  | GSM4626766 | Normal |
| GSM4626766_GACCAATAGAGATGAG-1  | GSM4626766 | Normal |
| GSM4626766_GACCAATAGCGATATA-1  | GSM4626766 | Normal |
| GSM4626766_GACCAATAGGCCGAAT-1  | GSM4626766 | Normal |
| GSM4626766_GACCAATCACTGTTAG-1  | GSM4626766 | Normal |
| GSM4626766_GACCAATGTCTGATTG-1  | GSM4626766 | Normal |
| GSM4626766_GACCAATGTTGCGTTA-1  | GSM4626766 | Normal |
| GSM4626766_GACCAATTCAGAGCTT-1  | GSM4626766 | Normal |
| GSM4626766_GACCAATTCTGCAGTA-1  | GSM4626766 | Normal |
| GSM4626766_GACCAATTCTTAGCCC-1  | GSM4626766 | Normal |
| GSM4626766_GACCTGGAGTGGGATC-1  | GSM4626766 | Normal |
| GSM4626766_GACCTGGCAATGAAAC-1  | GSM4626766 | Normal |
| GSM4626766_GACCTGGCACTTAAGC-1  | GSM4626766 | Normal |
| GSM4626766_GACCTGGCAGCGTCCA-1  | GSM4626766 | Normal |
| GSM4626766_GACCTGGCATAGTAAG-1  | GSM4626766 | Normal |
| GSM4626766_GACCTGGGTACGAAAT-1  | GSM4626766 | Normal |
| GSM4626766_GACCTGGGTAGAGGAA-1  | GSM4626766 | Normal |
| GSM4626766_GACCTGGGTGCATCTA-1  | GSM4626766 | Normal |
| GSM4626766_GACCTGGTCAAGGTAA-1  | GSM4626766 | Normal |
| GSM4626766_GACCTGGTCACAAACC-1  | GSM4626766 | Normal |
| GSM4626766_GACCTGGTCATGGTCA-1  | GSM4626766 | Normal |
| GSM4626766_GACCTGGTCCAACCAA-1  | GSM4626766 | Normal |
| GSM4626766_GACCTGGTCCCATTAT-1  | GSM4626766 | Normal |
| GSM4626766_GACCTGGTCGGCATCG-1  | GSM4626766 | Normal |
| GSM4626766_GACGCGTAGCGTGAAC-1  | GSM4626766 | Normal |
| GSM4626766_GACGCGTCAGCCTATA-1  | GSM4626766 | Normal |
| GSM4626766_GACGCGTGTAICTCGCG-1 | GSM4626766 | Normal |
| GSM4626766_GACGCGTGTAICTGTA-1  | GSM4626766 | Normal |
| GSM4626766_GACGCGTGATTCGTG-1   | GSM4626766 | Normal |
| GSM4626766_GACGCGTGCTTCGTG-1   | GSM4626766 | Normal |
| GSM4626766_GACGCGTGTAACGG-1    | GSM4626766 | Normal |
| GSM4626766_GACGCGTGTTGCGTC-1   | GSM4626766 | Normal |
| GSM4626766_GACGCGTTCAGAGGTG-1  | GSM4626766 | Normal |
| GSM4626766_GACGCGTTCAGCGACC-1  | GSM4626766 | Normal |
| GSM4626766_GACGCGTTCGTTGCCT-1  | GSM4626766 | Normal |
| GSM4626766_GACGCGTTCGTCTCG-1   | GSM4626766 | Normal |
| GSM4626766_GACGGCTAGAAACGAG-1  | GSM4626766 | Normal |
| GSM4626766_GACGGCTAGAAGGGTA-1  | GSM4626766 | Normal |
| GSM4626766_GACGGCTAGAGTAAGG-1  | GSM4626766 | Normal |
| GSM4626766_GACGGCTAGGCTAGGT-1  | GSM4626766 | Normal |
| GSM4626766_GACGGCTGTACCAGTT-1  | GSM4626766 | Normal |
| GSM4626766_GACGGCTGTCCAGTTA-1  | GSM4626766 | Normal |
| GSM4626766_GACGGCTGTGTTTGTG-1  | GSM4626766 | Normal |
| GSM4626766_GACGGCTGTTATGCGT-1  | GSM4626766 | Normal |
| GSM4626766_GACGGCTGTTCCGGCA-1  | GSM4626766 | Normal |
| GSM4626766_GACGGCTTCACAAACC-1  | GSM4626766 | Normal |
| GSM4626766_GACGGCTTCGCAAGC-1   | GSM4626766 | Normal |
| GSM4626766_GACGGCTTCGAACTGT-1  | GSM4626766 | Normal |
| GSM4626766_GACGGCTTCGCCATAA-1  | GSM4626766 | Normal |
| GSM4626766_GACGGCTTCGCCCTTA-1  | GSM4626766 | Normal |

|                                |            |        |
|--------------------------------|------------|--------|
| GSM4626766_GACGTGCAGTGTTGAA-1  | GSM4626766 | Normal |
| GSM4626766_GACGTGCAGTGTTTGC-1  | GSM4626766 | Normal |
| GSM4626766_GACGTGCCACCTCGGA-1  | GSM4626766 | Normal |
| GSM4626766_GACGTGCGTAGAGTGC-1  | GSM4626766 | Normal |
| GSM4626766_GACGTGCGTCAACTGT-1  | GSM4626766 | Normal |
| GSM4626766_GACGTGCGTCAGGACA-1  | GSM4626766 | Normal |
| GSM4626766_GACGTGCTCATTTGGG-1  | GSM4626766 | Normal |
| GSM4626766_GACGTGCTCCGAGCCA-1  | GSM4626766 | Normal |
| GSM4626766_GACGTTAAGATACACA-1  | GSM4626766 | Normal |
| GSM4626766_GACGTTAAGCCATCGC-1  | GSM4626766 | Normal |
| GSM4626766_GACGTTAAGCGCTCCA-1  | GSM4626766 | Normal |
| GSM4626766_GACGTTAAGCTGTCTA-1  | GSM4626766 | Normal |
| GSM4626766_GACGTTACACCCTATC-1  | GSM4626766 | Normal |
| GSM4626766_GACGTTACATTCCCTCG-1 | GSM4626766 | Normal |
| GSM4626766_GACGTTAGTACAGTTC-1  | GSM4626766 | Normal |
| GSM4626766_GACGTTAGTTGACGTT-1  | GSM4626766 | Normal |
| GSM4626766_GACGTTATCCCTCAGT-1  | GSM4626766 | Normal |
| GSM4626766_GACGTTATCTACTCAT-1  | GSM4626766 | Normal |
| GSM4626766_GACTAACAGAAACCGC-1  | GSM4626766 | Normal |
| GSM4626766_GACTAACAGAACAATC-1  | GSM4626766 | Normal |
| GSM4626766_GACTAACAGACACGAC-1  | GSM4626766 | Normal |
| GSM4626766_GACTAACAGATAGTCA-1  | GSM4626766 | Normal |
| GSM4626766_GACTAACAGCATGGCA-1  | GSM4626766 | Normal |
| GSM4626766_GACTAACAGCGATTCT-1  | GSM4626766 | Normal |
| GSM4626766_GACTAACAGCGTGTCC-1  | GSM4626766 | Normal |
| GSM4626766_GACTAACCAAGTCATC-1  | GSM4626766 | Normal |
| GSM4626766_GACTAACACATGTGT-1   | GSM4626766 | Normal |
| GSM4626766_GACTAACGTCCAAGTT-1  | GSM4626766 | Normal |
| GSM4626766_GACTAACGTGTCGCTG-1  | GSM4626766 | Normal |
| GSM4626766_GACTAACGTGTGGTTT-1  | GSM4626766 | Normal |
| GSM4626766_GACTAACTCACATGCA-1  | GSM4626766 | Normal |
| GSM4626766_GACTAACTCCAATGGT-1  | GSM4626766 | Normal |
| GSM4626766_GACTAACTCCGACTT-1   | GSM4626766 | Normal |
| GSM4626766_GACTACAAGAGTAAGG-1  | GSM4626766 | Normal |
| GSM4626766_GACTACAAGCGCTCCA-1  | GSM4626766 | Normal |
| GSM4626766_GACTACAAGCTAACAA-1  | GSM4626766 | Normal |
| GSM4626766_GACTACAAGGTA CTCT-1 | GSM4626766 | Normal |
| GSM4626766_GACTACACACCCATGG-1  | GSM4626766 | Normal |
| GSM4626766_GACTACACACGGACAA-1  | GSM4626766 | Normal |
| GSM4626766_GACTACACAGCTGGCT-1  | GSM4626766 | Normal |
| GSM4626766_GACTACACATCTGGTA-1  | GSM4626766 | Normal |
| GSM4626766_GACTACAGTAGGAGTC-1  | GSM4626766 | Normal |
| GSM4626766_GACTACAGTCCGTCAG-1  | GSM4626766 | Normal |
| GSM4626766_GACTACAGTTGAACTC-1  | GSM4626766 | Normal |
| GSM4626766_GACTACAGTTGGACCC-1  | GSM4626766 | Normal |
| GSM4626766_GACTACATCACATAGC-1  | GSM4626766 | Normal |
| GSM4626766_GACTACATCGCAAGCC-1  | GSM4626766 | Normal |
| GSM4626766_GACTACATCTCCAACC-1  | GSM4626766 | Normal |
| GSM4626766_GACTACATCTGACCTC-1  | GSM4626766 | Normal |
| GSM4626766_GACTGCGAGTACTTGC-1  | GSM4626766 | Normal |
| GSM4626766_GACTGCGAGTCCGGTC-1  | GSM4626766 | Normal |
| GSM4626766_GACTGCGCAAGTAATG-1  | GSM4626766 | Normal |
| GSM4626766_GACTGCGCACGACGAA-1  | GSM4626766 | Normal |
| GSM4626766_GACTGCGGTCATGCAT-1  | GSM4626766 | Normal |
| GSM4626766_GACTGCGGTCCTAGCG-1  | GSM4626766 | Normal |
| GSM4626766_GACTGCGGTGAACCTT-1  | GSM4626766 | Normal |
| GSM4626766_GACTGCGTCCATTCTA-1  | GSM4626766 | Normal |

|                               |            |        |
|-------------------------------|------------|--------|
| GSM4626766_GACTGCGTCGTTACAG-1 | GSM4626766 | Normal |
| GSM4626766_GAGCAGAAGACAGACC-1 | GSM4626766 | Normal |
| GSM4626766_GAGCAGAAGAGGTACC-1 | GSM4626766 | Normal |
| GSM4626766_GAGCAGAAGCACACAG-1 | GSM4626766 | Normal |
| GSM4626766_GAGCAGAAGGTGTTAA-1 | GSM4626766 | Normal |
| GSM4626766_GAGCAGAAGTGAGAA-1  | GSM4626766 | Normal |
| GSM4626766_GAGCAGAAGTTATCGC-1 | GSM4626766 | Normal |
| GSM4626766_GAGCAGACACAGGAGT-1 | GSM4626766 | Normal |
| GSM4626766_GAGCAGACACGGCCAT-1 | GSM4626766 | Normal |
| GSM4626766_GAGCAGACAGGGATTG-1 | GSM4626766 | Normal |
| GSM4626766_GAGCAGACAGTCGTGC-1 | GSM4626766 | Normal |
| GSM4626766_GAGCAGAGTACCATCA-1 | GSM4626766 | Normal |
| GSM4626766_GAGCAGAGTACCGTAT-1 | GSM4626766 | Normal |
| GSM4626766_GAGCAGATCCGCAGTG-1 | GSM4626766 | Normal |
| GSM4626766_GAGCAGATCTGCCCTA-1 | GSM4626766 | Normal |
| GSM4626766_GAGGTGAAGCACCGTC-1 | GSM4626766 | Normal |
| GSM4626766_GAGGTGAAGGACAGCT-1 | GSM4626766 | Normal |
| GSM4626766_GAGGTGAAGGCTAGAC-1 | GSM4626766 | Normal |
| GSM4626766_GAGGTGACAACTGTC-1  | GSM4626766 | Normal |
| GSM4626766_GAGGTGACACATTTCT-1 | GSM4626766 | Normal |
| GSM4626766_GAGGTGACACGACGAA-1 | GSM4626766 | Normal |
| GSM4626766_GAGGTGACACGGCTAC-1 | GSM4626766 | Normal |
| GSM4626766_GAGGTGAGTCAGAAGC-1 | GSM4626766 | Normal |
| GSM4626766_GAGGTGAGTCTAGTGT-1 | GSM4626766 | Normal |
| GSM4626766_GAGGTGAGTCTTGATG-1 | GSM4626766 | Normal |
| GSM4626766_GAGGTGAGTGACTACT-1 | GSM4626766 | Normal |
| GSM4626766_GAGGTGATCACCGTAA-1 | GSM4626766 | Normal |
| GSM4626766_GAGGTGATCTTAGAGC-1 | GSM4626766 | Normal |
| GSM4626766_GAGTCCGAGAGTCTGG-1 | GSM4626766 | Normal |
| GSM4626766_GAGTCCGAGCTTCGCG-1 | GSM4626766 | Normal |
| GSM4626766_GAGTCCGAGGTGTTAA-1 | GSM4626766 | Normal |
| GSM4626766_GAGTCCGAGTCCGTAT-1 | GSM4626766 | Normal |
| GSM4626766_GAGTCCGAGTGACTCT-1 | GSM4626766 | Normal |
| GSM4626766_GAGTCCGCACGGTGTC-1 | GSM4626766 | Normal |
| GSM4626766_GAGTCCGCAGATGGCA-1 | GSM4626766 | Normal |
| GSM4626766_GAGTCCGGTAGCGCTC-1 | GSM4626766 | Normal |
| GSM4626766_GAGTCCGGTATTACCG-1 | GSM4626766 | Normal |
| GSM4626766_GAGTCCGTCAGTTTGG-1 | GSM4626766 | Normal |
| GSM4626766_GAGTCCGTCCAGAAGG-1 | GSM4626766 | Normal |
| GSM4626766_GAGTCCGTCTTCCTTC-1 | GSM4626766 | Normal |
| GSM4626766_GAGTCCGTCTTGATC-1  | GSM4626766 | Normal |
| GSM4626766_GATCAGTAGATGTAAC-1 | GSM4626766 | Normal |
| GSM4626766_GATCAGTAGCGATATA-1 | GSM4626766 | Normal |
| GSM4626766_GATCAGTAGGCCCGTT-1 | GSM4626766 | Normal |
| GSM4626766_GATCAGTAGGCTCATT-1 | GSM4626766 | Normal |
| GSM4626766_GATCAGTCAGAAGCAC-1 | GSM4626766 | Normal |
| GSM4626766_GATCAGTCATGGTAGG-1 | GSM4626766 | Normal |
| GSM4626766_GATCAGTGATGCGATG-1 | GSM4626766 | Normal |
| GSM4626766_GATCAGTTCAATACCG-1 | GSM4626766 | Normal |
| GSM4626766_GATCAGTTCAGATAAG-1 | GSM4626766 | Normal |
| GSM4626766_GATCAGTTCCAATGGT-1 | GSM4626766 | Normal |
| GSM4626766_GATCAGTTCGATCCCT-1 | GSM4626766 | Normal |
| GSM4626766_GATCAGTTCGGCGCTA-1 | GSM4626766 | Normal |
| GSM4626766_GATCGATAGCTCCTCT-1 | GSM4626766 | Normal |
| GSM4626766_GATCGATAGCTGGAAC-1 | GSM4626766 | Normal |
| GSM4626766_GATCGATAGTGAACAT-1 | GSM4626766 | Normal |
| GSM4626766_GATCGATAGTGCGTGA-1 | GSM4626766 | Normal |

|                                |            |        |
|--------------------------------|------------|--------|
| GSM4626766_GATCGATCAATCGAAA-1  | GSM4626766 | Normal |
| GSM4626766_GATCGATCATGATCCA-1  | GSM4626766 | Normal |
| GSM4626766_GATCGATGTCCAGTAT-1  | GSM4626766 | Normal |
| GSM4626766_GATCGATGTGACCAAG-1  | GSM4626766 | Normal |
| GSM4626766_GATCGATGTGCACGAA-1  | GSM4626766 | Normal |
| GSM4626766_GATCGATGTGGGTATG-1  | GSM4626766 | Normal |
| GSM4626766_GATCGATTCAATCTCT-1  | GSM4626766 | Normal |
| GSM4626766_GATCGATTCCAGTTAGC-1 | GSM4626766 | Normal |
| GSM4626766_GATCGATTCCGTAGGC-1  | GSM4626766 | Normal |
| GSM4626766_GATCGATTCCGGATGTT-1 | GSM4626766 | Normal |
| GSM4626766_GATCGATTCTCTAAGG-1  | GSM4626766 | Normal |
| GSM4626766_GATCGATTCTGGAGCC-1  | GSM4626766 | Normal |
| GSM4626766_GATCGCGAGATCCCAT-1  | GSM4626766 | Normal |
| GSM4626766_GATCGCGCACTTAACG-1  | GSM4626766 | Normal |
| GSM4626766_GATCGCGCAGATCTGT-1  | GSM4626766 | Normal |
| GSM4626766_GATCGCGCATCGGAAG-1  | GSM4626766 | Normal |
| GSM4626766_GATCGCGGTGGCAAAC-1  | GSM4626766 | Normal |
| GSM4626766_GATCGCGTCAGCACAT-1  | GSM4626766 | Normal |
| GSM4626766_GATCGCGTCTGACCTC-1  | GSM4626766 | Normal |
| GSM4626766_GATCGTAAGAGGTAGA-1  | GSM4626766 | Normal |
| GSM4626766_GATCGTAAGGAGTCTG-1  | GSM4626766 | Normal |
| GSM4626766_GATCGTAAGGCATGTG-1  | GSM4626766 | Normal |
| GSM4626766_GATCGTAGTCCAGTAT-1  | GSM4626766 | Normal |
| GSM4626766_GATCGTAGTCTAGTCA-1  | GSM4626766 | Normal |
| GSM4626766_GATCGTAGTGTGTGCC-1  | GSM4626766 | Normal |
| GSM4626766_GATCGTAGTGTTCGAT-1  | GSM4626766 | Normal |
| GSM4626766_GATCGTAGTTATGCGT-1  | GSM4626766 | Normal |
| GSM4626766_GATCGTATCAACACCA-1  | GSM4626766 | Normal |
| GSM4626766_GATCGTATCATTGCC-1   | GSM4626766 | Normal |
| GSM4626766_GATCGTATCCAACAA-1   | GSM4626766 | Normal |
| GSM4626766_GATCGTATCTATCGCC-1  | GSM4626766 | Normal |
| GSM4626766_GATCTAGAGAGTGACC-1  | GSM4626766 | Normal |
| GSM4626766_GATCTAGAGCCGATTT-1  | GSM4626766 | Normal |
| GSM4626766_GATCTAGAGGCGATAC-1  | GSM4626766 | Normal |
| GSM4626766_GATCTAGAGTAGCCGA-1  | GSM4626766 | Normal |
| GSM4626766_GATCTAGCACGTCTCT-1  | GSM4626766 | Normal |
| GSM4626766_GATCTAGCAGGTTTCA-1  | GSM4626766 | Normal |
| GSM4626766_GATCTAGGTACAGACG-1  | GSM4626766 | Normal |
| GSM4626766_GATCTAGGTAGTAGTA-1  | GSM4626766 | Normal |
| GSM4626766_GATCTAGGTGCAGGTA-1  | GSM4626766 | Normal |
| GSM4626766_GATCTAGGTTAAGATG-1  | GSM4626766 | Normal |
| GSM4626766_GATCTAGGTTATTCTC-1  | GSM4626766 | Normal |
| GSM4626766_GATCTAGTCTGTCCGT-1  | GSM4626766 | Normal |
| GSM4626766_GATCTAGTCTTGAGGT-1  | GSM4626766 | Normal |
| GSM4626766_GATGAAAAGCGATAGC-1  | GSM4626766 | Normal |
| GSM4626766_GATGAAAAGGTGATAT-1  | GSM4626766 | Normal |
| GSM4626766_GATGAAAAGTGCCATT-1  | GSM4626766 | Normal |
| GSM4626766_GATGAAACAAAGCGGT-1  | GSM4626766 | Normal |
| GSM4626766_GATGAAACACAACGTT-1  | GSM4626766 | Normal |
| GSM4626766_GATGAAACACGACAA-1   | GSM4626766 | Normal |
| GSM4626766_GATGAAACAGTATGCT-1  | GSM4626766 | Normal |
| GSM4626766_GATGAAACATCTACGA-1  | GSM4626766 | Normal |
| GSM4626766_GATGAAACATGTAGTC-1  | GSM4626766 | Normal |
| GSM4626766_GATGAAAAGTAAACCTC-1 | GSM4626766 | Normal |
| GSM4626766_GATGAAAAGTAGGGTAC-1 | GSM4626766 | Normal |
| GSM4626766_GATGAAAAGTATGCTTG-1 | GSM4626766 | Normal |
| GSM4626766_GATGAAAAGTCAACATC-1 | GSM4626766 | Normal |

|                               |            |        |
|-------------------------------|------------|--------|
| GSM4626766_GATGAAAGTGAGGGAG-1 | GSM4626766 | Normal |
| GSM4626766_GATGAAAGTGTGCCTG-1 | GSM4626766 | Normal |
| GSM4626766_GATGAAATCACGCATA-1 | GSM4626766 | Normal |
| GSM4626766_GATGAAATCATGTCCC-1 | GSM4626766 | Normal |
| GSM4626766_GATGAGGAGATGTTAG-1 | GSM4626766 | Normal |
| GSM4626766_GATGAGGAGCAGCCTC-1 | GSM4626766 | Normal |
| GSM4626766_GATGAGGAGCATGGCA-1 | GSM4626766 | Normal |
| GSM4626766_GATGAGGCACCCAGTG-1 | GSM4626766 | Normal |
| GSM4626766_GATGAGGCAGCTGTGC-1 | GSM4626766 | Normal |
| GSM4626766_GATGAGGTCACAAACC-1 | GSM4626766 | Normal |
| GSM4626766_GATGCTAAGACGACGT-1 | GSM4626766 | Normal |
| GSM4626766_GATGCTAAGCCAGTTT-1 | GSM4626766 | Normal |
| GSM4626766_GATGCTACAAGTCTGT-1 | GSM4626766 | Normal |
| GSM4626766_GATGCTACACAACGCC-1 | GSM4626766 | Normal |
| GSM4626766_GATGCTACACCATCCT-1 | GSM4626766 | Normal |
| GSM4626766_GATGCTACATGGAATA-1 | GSM4626766 | Normal |
| GSM4626766_GATGCTAGTAAGTGGC-1 | GSM4626766 | Normal |
| GSM4626766_GATGCTAGTATCACCA-1 | GSM4626766 | Normal |
| GSM4626766_GATGCTAGTTGATTGC-1 | GSM4626766 | Normal |
| GSM4626766_GATGCTAGTTGTGGCC-1 | GSM4626766 | Normal |
| GSM4626766_GATGCTATCCGCAAGC-1 | GSM4626766 | Normal |
| GSM4626766_GATGCTATCGCCAAAT-1 | GSM4626766 | Normal |
| GSM4626766_GATGCTATCGGTGTTA-1 | GSM4626766 | Normal |
| GSM4626766_GATTCAGAGGAGTTTA-1 | GSM4626766 | Normal |
| GSM4626766_GATTCAGGTCGAGTTT-1 | GSM4626766 | Normal |
| GSM4626766_GATTCAGTCAACACTG-1 | GSM4626766 | Normal |
| GSM4626766_GATTCAGTCAGATAAG-1 | GSM4626766 | Normal |
| GSM4626766_GATTCAGTCAGTGTTG-1 | GSM4626766 | Normal |
| GSM4626766_GATTCAGTCCTCGCAT-1 | GSM4626766 | Normal |
| GSM4626766_GATTCAGTCTCTAGGA-1 | GSM4626766 | Normal |
| GSM4626766_GATTCAGTCTTACCGC-1 | GSM4626766 | Normal |
| GSM4626766_GCAAAGTAGACCTTTG-1 | GSM4626766 | Normal |
| GSM4626766_GCAAAGTAGGTAAACT-1 | GSM4626766 | Normal |
| GSM4626766_GCAAAGTAGTGTACTC-1 | GSM4626766 | Normal |
| GSM4626766_GCAAAGTAGTGTCTCA-1 | GSM4626766 | Normal |
| GSM4626766_GCAAAGTCAACGATGG-1 | GSM4626766 | Normal |
| GSM4626766_GCAAAGTCAAGTAGTA-1 | GSM4626766 | Normal |
| GSM4626766_GCAAAGTCATTATCTC-1 | GSM4626766 | Normal |
| GSM4626766_GCAAAGTGTCCAACA-1  | GSM4626766 | Normal |
| GSM4626766_GCAAAGTGTCTGTTT-1  | GSM4626766 | Normal |
| GSM4626766_GCAAAGTTCAGAGGTG-1 | GSM4626766 | Normal |
| GSM4626766_GCAAAGTTCAGTTAGC-1 | GSM4626766 | Normal |
| GSM4626766_GCAAAGTTCGGCTTGG-1 | GSM4626766 | Normal |
| GSM4626766_GCAAAGTTCGTACGGC-1 | GSM4626766 | Normal |
| GSM4626766_GCAAAGTTCGTTTAGG-1 | GSM4626766 | Normal |
| GSM4626766_GCAATCAAGATATACG-1 | GSM4626766 | Normal |
| GSM4626766_GCAATCAAGCTGATAA-1 | GSM4626766 | Normal |
| GSM4626766_GCAATCAAGTCCGGTC-1 | GSM4626766 | Normal |
| GSM4626766_GCAATCACAAAGTTTC-1 | GSM4626766 | Normal |
| GSM4626766_GCAATCACACCATCCT-1 | GSM4626766 | Normal |
| GSM4626766_GCAATCACAGGTCTCG-1 | GSM4626766 | Normal |
| GSM4626766_GCAATCACATACAGCT-1 | GSM4626766 | Normal |
| GSM4626766_GCAATCAGTATCAGTC-1 | GSM4626766 | Normal |
| GSM4626766_GCAATCAGTATTAGCC-1 | GSM4626766 | Normal |
| GSM4626766_GCAATCATCAACGAAA-1 | GSM4626766 | Normal |
| GSM4626766_GCAATCATCACGCGGT-1 | GSM4626766 | Normal |
| GSM4626766_GCAATCATCATAAAGG-1 | GSM4626766 | Normal |

|                                |            |        |
|--------------------------------|------------|--------|
| GSM4626766_GCAATCATCCACGAAT-1  | GSM4626766 | Normal |
| GSM4626766_GCAATCATCGAATGCT-1  | GSM4626766 | Normal |
| GSM4626766_GCACATAAGACCGGAT-1  | GSM4626766 | Normal |
| GSM4626766_GCACATAAGTGCTGCC-1  | GSM4626766 | Normal |
| GSM4626766_GCACATAAGTTTCGCAT-1 | GSM4626766 | Normal |
| GSM4626766_GCACATACAAGTAATG-1  | GSM4626766 | Normal |
| GSM4626766_GCACATACAATGCCAT-1  | GSM4626766 | Normal |
| GSM4626766_GCACATACACCAGTTA-1  | GSM4626766 | Normal |
| GSM4626766_GCACATACAGGGTTAG-1  | GSM4626766 | Normal |
| GSM4626766_GCACATAGTAAATGAC-1  | GSM4626766 | Normal |
| GSM4626766_GCACATAGTAGTAGTA-1  | GSM4626766 | Normal |
| GSM4626766_GCACATAGTTCAGCGC-1  | GSM4626766 | Normal |
| GSM4626766_GCACATATCTCTGTCTG-1 | GSM4626766 | Normal |
| GSM4626766_GCACATATCTGCAAGT-1  | GSM4626766 | Normal |
| GSM4626766_GCACTCTAGCGTGTCC-1  | GSM4626766 | Normal |
| GSM4626766_GCACTCTAGGCTAGAC-1  | GSM4626766 | Normal |
| GSM4626766_GCACTCTAGGCTCATT-1  | GSM4626766 | Normal |
| GSM4626766_GCACTCTAGGTAGCTG-1  | GSM4626766 | Normal |
| GSM4626766_GCACTCTAGTATGACA-1  | GSM4626766 | Normal |
| GSM4626766_GCACTCTCAGATGGCA-1  | GSM4626766 | Normal |
| GSM4626766_GCACTCTCATCCGTGG-1  | GSM4626766 | Normal |
| GSM4626766_GCACTCTGTAATAGCA-1  | GSM4626766 | Normal |
| GSM4626766_GCACTCTGTTACCGAT-1  | GSM4626766 | Normal |
| GSM4626766_GCACTCTTACCATAG-1   | GSM4626766 | Normal |
| GSM4626766_GCACTCTTCAAGTGCAT-1 | GSM4626766 | Normal |
| GSM4626766_GCACTCTTCAATTATCC-1 | GSM4626766 | Normal |
| GSM4626766_GCACTCTTCCGAATGT-1  | GSM4626766 | Normal |
| GSM4626766_GCACTCTTCGCCCTTA-1  | GSM4626766 | Normal |
| GSM4626766_GCACTCTTCTGCAGTA-1  | GSM4626766 | Normal |
| GSM4626766_GCAGCCAAGACTGGGT-1  | GSM4626766 | Normal |
| GSM4626766_GCAGCCAAGTCACGCC-1  | GSM4626766 | Normal |
| GSM4626766_GCAGCCACAGCGATCC-1  | GSM4626766 | Normal |
| GSM4626766_GCAGCCAGTATTCGTG-1  | GSM4626766 | Normal |
| GSM4626766_GCAGCCAGTGACTACT-1  | GSM4626766 | Normal |
| GSM4626766_GCAGCCATCAAGGCTT-1  | GSM4626766 | Normal |
| GSM4626766_GCAGCCATCACCGTAA-1  | GSM4626766 | Normal |
| GSM4626766_GCAGCCATCTTAGCCC-1  | GSM4626766 | Normal |
| GSM4626766_GCAGTTAAGAAGGCCT-1  | GSM4626766 | Normal |
| GSM4626766_GCAGTTAAGCAAATCA-1  | GSM4626766 | Normal |
| GSM4626766_GCAGTTAAGCGATAGC-1  | GSM4626766 | Normal |
| GSM4626766_GCAGTTAAGCGATGAC-1  | GSM4626766 | Normal |
| GSM4626766_GCAGTTAAGCTCCAG-1   | GSM4626766 | Normal |
| GSM4626766_GCAGTTACACATCCGG-1  | GSM4626766 | Normal |
| GSM4626766_GCAGTTACACATGGGA-1  | GSM4626766 | Normal |
| GSM4626766_GCAGTTACATACGCTA-1  | GSM4626766 | Normal |
| GSM4626766_GCAGTTACATCGATGT-1  | GSM4626766 | Normal |
| GSM4626766_GCAGTTATCAAGATCC-1  | GSM4626766 | Normal |
| GSM4626766_GCAGTTATCAGGCGAA-1  | GSM4626766 | Normal |
| GSM4626766_GCAGTTATCCCACTTG-1  | GSM4626766 | Normal |
| GSM4626766_GCAGTTATCTACTCAT-1  | GSM4626766 | Normal |
| GSM4626766_GCAGTTATCTGCGTAA-1  | GSM4626766 | Normal |
| GSM4626766_GCATACAAGGATGGTC-1  | GSM4626766 | Normal |
| GSM4626766_GCATACAAGTTGAGAT-1  | GSM4626766 | Normal |
| GSM4626766_GCATACACATCACCCCT-1 | GSM4626766 | Normal |
| GSM4626766_GCATACACATCCGGGT-1  | GSM4626766 | Normal |
| GSM4626766_GCATACAGTCAGGACA-1  | GSM4626766 | Normal |
| GSM4626766_GCATACAGTGCCCTA-1   | GSM4626766 | Normal |



|                                |            |        |
|--------------------------------|------------|--------|
| GSM4626766_GCATACATCATTGCC-1   | GSM4626766 | Normal |
| GSM4626766_GCATACATCTTAGCCC-1  | GSM4626766 | Normal |
| GSM4626766_GCATGATAGATGTTAG-1  | GSM4626766 | Normal |
| GSM4626766_GCATGATAGCCATCGC-1  | GSM4626766 | Normal |
| GSM4626766_GCATGATAGGAACTGC-1  | GSM4626766 | Normal |
| GSM4626766_GCATGATAGGAATCGC-1  | GSM4626766 | Normal |
| GSM4626766_GCATGATCAAACAACA-1  | GSM4626766 | Normal |
| GSM4626766_GCATGATGTAGATTAG-1  | GSM4626766 | Normal |
| GSM4626766_GCATGATGTAGCTTGT-1  | GSM4626766 | Normal |
| GSM4626766_GCATGATGTGAGGCTA-1  | GSM4626766 | Normal |
| GSM4626766_GCATGATGTTCAGTAC-1  | GSM4626766 | Normal |
| GSM4626766_GCATGATTCCAGTAGT-1  | GSM4626766 | Normal |
| GSM4626766_GCATGATTCCGTCATC-1  | GSM4626766 | Normal |
| GSM4626766_GCATGATTTCGTGGGAA-1 | GSM4626766 | Normal |
| GSM4626766_GCATGATTCTGATACG-1  | GSM4626766 | Normal |
| GSM4626766_GCATGATTCTGGAGCC-1  | GSM4626766 | Normal |
| GSM4626766_GCATGCGAGAGTCTGG-1  | GSM4626766 | Normal |
| GSM4626766_GCATGCGAGATCACGG-1  | GSM4626766 | Normal |
| GSM4626766_GCATGCGAGCACAGGT-1  | GSM4626766 | Normal |
| GSM4626766_GCATGCGAGCCACGTC-1  | GSM4626766 | Normal |
| GSM4626766_GCATGCGAGCTTTGGT-1  | GSM4626766 | Normal |
| GSM4626766_GCATGCGAGTGTACTC-1  | GSM4626766 | Normal |
| GSM4626766_GCATGCGCACGAAATA-1  | GSM4626766 | Normal |
| GSM4626766_GCATGCGCACTTGGAT-1  | GSM4626766 | Normal |
| GSM4626766_GCATGCGCATCGGAAG-1  | GSM4626766 | Normal |
| GSM4626766_GCATGCGGTCCGACGT-1  | GSM4626766 | Normal |
| GSM4626766_GCATGCGGTTCGTTCT-1  | GSM4626766 | Normal |
| GSM4626766_GCATGCGGTCTTCAAG-1  | GSM4626766 | Normal |
| GSM4626766_GCATGCGGTTCGTGAT-1  | GSM4626766 | Normal |
| GSM4626766_GCATGCGGTTCTGGTA-1  | GSM4626766 | Normal |
| GSM4626766_GCATGCGTCCGTAGGC-1  | GSM4626766 | Normal |
| GSM4626766_GCATGCGTCCTGCAGG-1  | GSM4626766 | Normal |
| GSM4626766_GCATGCGTCGCAAGCC-1  | GSM4626766 | Normal |
| GSM4626766_GCATGTAAGACGCACA-1  | GSM4626766 | Normal |
| GSM4626766_GCATGTAAGAGTAATC-1  | GSM4626766 | Normal |
| GSM4626766_GCATGTAAGCCCTAAT-1  | GSM4626766 | Normal |
| GSM4626766_GCATGTAAGCGTTAT-1   | GSM4626766 | Normal |
| GSM4626766_GCATGTACAATTCCTT-1  | GSM4626766 | Normal |
| GSM4626766_GCATGTACAGTACACT-1  | GSM4626766 | Normal |
| GSM4626766_GCATGTACATATACGC-1  | GSM4626766 | Normal |
| GSM4626766_GCATGTAGTGAGGGAG-1  | GSM4626766 | Normal |
| GSM4626766_GCATGTAGTTCCTTG-1   | GSM4626766 | Normal |
| GSM4626766_GCATGTAGTTCGTCTC-1  | GSM4626766 | Normal |
| GSM4626766_GCATGTATCCGCATCT-1  | GSM4626766 | Normal |
| GSM4626766_GCATGTATCGGTTAAC-1  | GSM4626766 | Normal |
| GSM4626766_GCCAAATAGGACAGCT-1  | GSM4626766 | Normal |
| GSM4626766_GCCAAATAGGATATAC-1  | GSM4626766 | Normal |
| GSM4626766_GCCAAATCAATAACGA-1  | GSM4626766 | Normal |
| GSM4626766_GCCAAATCATCCAACA-1  | GSM4626766 | Normal |
| GSM4626766_GCCAAATGTGATGTCT-1  | GSM4626766 | Normal |
| GSM4626766_GCCAAATTCAGAAATG-1  | GSM4626766 | Normal |
| GSM4626766_GCCAAATTCGGCGCAT-1  | GSM4626766 | Normal |
| GSM4626766_GCCAAATTCCTAACCGA-1 | GSM4626766 | Normal |
| GSM4626766_GCCAAATTCCTGATTCT-1 | GSM4626766 | Normal |
| GSM4626766_GCCTCTAAGACTGGGT-1  | GSM4626766 | Normal |
| GSM4626766_GCCTCTAAGCTGAACG-1  | GSM4626766 | Normal |
| GSM4626766_GCCTCTAAGGAGTACC-1  | GSM4626766 | Normal |

|                                |            |        |
|--------------------------------|------------|--------|
| GSM4626766_GCCTCTAAGGTGACCA-1  | GSM4626766 | Normal |
| GSM4626766_GCCTCTAAGGTGCTTT-1  | GSM4626766 | Normal |
| GSM4626766_GCCTCTACACAGATTC-1  | GSM4626766 | Normal |
| GSM4626766_GCCTCTACACCGAATT-1  | GSM4626766 | Normal |
| GSM4626766_GCCTCTAGTACATGTC-1  | GSM4626766 | Normal |
| GSM4626766_GCCTCTAGTAGAGGAA-1  | GSM4626766 | Normal |
| GSM4626766_GCCTCTAGTAGGACAC-1  | GSM4626766 | Normal |
| GSM4626766_GCCTCTAGTCCGAACC-1  | GSM4626766 | Normal |
| GSM4626766_GCCTCTAGTTCTGTTT-1  | GSM4626766 | Normal |
| GSM4626766_GCCTCTAGTTGAGGTG-1  | GSM4626766 | Normal |
| GSM4626766_GCCTCTATCATCTGTT-1  | GSM4626766 | Normal |
| GSM4626766_GCCTCTATCCGTTGTC-1  | GSM4626766 | Normal |
| GSM4626766_GCCTCTATCCTAGTGA-1  | GSM4626766 | Normal |
| GSM4626766_GCCTCTATCCTGCTTG-1  | GSM4626766 | Normal |
| GSM4626766_GCCTCTATCCTTCAAT-1  | GSM4626766 | Normal |
| GSM4626766_GCCTCTATCGCCTGTT-1  | GSM4626766 | Normal |
| GSM4626766_GCGACCAAGCTGATAA-1  | GSM4626766 | Normal |
| GSM4626766_GCGACCAAGTCCAGGA-1  | GSM4626766 | Normal |
| GSM4626766_GCGACCACAAACGTGG-1  | GSM4626766 | Normal |
| GSM4626766_GCGACCAGTAGGGTAC-1  | GSM4626766 | Normal |
| GSM4626766_GCGACCAGTCACCTAA-1  | GSM4626766 | Normal |
| GSM4626766_GCGACCAGTCGAGTTT-1  | GSM4626766 | Normal |
| GSM4626766_GCGACCAGTGTAAGTA-1  | GSM4626766 | Normal |
| GSM4626766_GCGACCAGTGTGTTG-1   | GSM4626766 | Normal |
| GSM4626766_GCGACCAGTTTGCGC-1   | GSM4626766 | Normal |
| GSM4626766_GCGACCATCAACACAC-1  | GSM4626766 | Normal |
| GSM4626766_GCGAGAAAGACTACAA-1  | GSM4626766 | Normal |
| GSM4626766_GCGAGAAAGCAGACTG-1  | GSM4626766 | Normal |
| GSM4626766_GCGAGAAAGCTCCTCT-1  | GSM4626766 | Normal |
| GSM4626766_GCGAGAAAGTTGAGAT-1  | GSM4626766 | Normal |
| GSM4626766_GCGAGAAACAAGCTGGA-1 | GSM4626766 | Normal |
| GSM4626766_GCGAGAAACAATGAATG-1 | GSM4626766 | Normal |
| GSM4626766_GCGAGAACACAGAGGT-1  | GSM4626766 | Normal |
| GSM4626766_GCGAGAACACATTCTGA-1 | GSM4626766 | Normal |
| GSM4626766_GCGAGAACAGGAATCG-1  | GSM4626766 | Normal |
| GSM4626766_GCGAGAACAGGGAGAG-1  | GSM4626766 | Normal |
| GSM4626766_GCGAGAAGTCTAACGT-1  | GSM4626766 | Normal |
| GSM4626766_GCGAGAATCGCCTGTT-1  | GSM4626766 | Normal |
| GSM4626766_GCGAGAATCTTGCCGT-1  | GSM4626766 | Normal |
| GSM4626766_GCGCAACAGAGGGCTT-1  | GSM4626766 | Normal |
| GSM4626766_GCGCAACAGCGTGAAC-1  | GSM4626766 | Normal |
| GSM4626766_GCGCAACCACATTAGC-1  | GSM4626766 | Normal |
| GSM4626766_GCGCAACCAGACACTT-1  | GSM4626766 | Normal |
| GSM4626766_GCGCAACCAGTCCAC-1   | GSM4626766 | Normal |
| GSM4626766_GCGCAACCATCATCCC-1  | GSM4626766 | Normal |
| GSM4626766_GCGCAACCATCGATTG-1  | GSM4626766 | Normal |
| GSM4626766_GCGCAACGTAGCGTGA-1  | GSM4626766 | Normal |
| GSM4626766_GCGCAACGTTACCTC-1   | GSM4626766 | Normal |
| GSM4626766_GCGCAACTCAAACGGG-1  | GSM4626766 | Normal |
| GSM4626766_GCGCAACTCAACCAAC-1  | GSM4626766 | Normal |
| GSM4626766_GCGCAACTCAGTCCCT-1  | GSM4626766 | Normal |
| GSM4626766_GCGCAACTCCGGGTGT-1  | GSM4626766 | Normal |
| GSM4626766_GCGCAACTCTGCAGTA-1  | GSM4626766 | Normal |
| GSM4626766_GCGCAACTCTGCTTGC-1  | GSM4626766 | Normal |
| GSM4626766_GCGCAGTCAATCGGTT-1  | GSM4626766 | Normal |
| GSM4626766_GCGCAGTCAGCTGGCT-1  | GSM4626766 | Normal |
| GSM4626766_GCGCAGTCAGTAAGAT-1  | GSM4626766 | Normal |

|                                |            |        |
|--------------------------------|------------|--------|
| GSM4626766_GCGCAGTCATCGTCGG-1  | GSM4626766 | Normal |
| GSM4626766_GCGCAGTCATCTATGG-1  | GSM4626766 | Normal |
| GSM4626766_GCGCAGTCATCTCGCT-1  | GSM4626766 | Normal |
| GSM4626766_GCGCAGTCATGCTAGT-1  | GSM4626766 | Normal |
| GSM4626766_GCGCAGTGTCACCCAG-1  | GSM4626766 | Normal |
| GSM4626766_GCGCAGTGTCGATTGT-1  | GSM4626766 | Normal |
| GSM4626766_GCGCAGTGTGATGCC-1   | GSM4626766 | Normal |
| GSM4626766_GCGCAGTGTGCAACGA-1  | GSM4626766 | Normal |
| GSM4626766_GCGCAGTTCAAGATCC-1  | GSM4626766 | Normal |
| GSM4626766_GCGCAGTTCTGCGTAA-1  | GSM4626766 | Normal |
| GSM4626766_GCGCCAAAGCGTAATA-1  | GSM4626766 | Normal |
| GSM4626766_GCGCCAAAGCTAGGCA-1  | GSM4626766 | Normal |
| GSM4626766_GCGCCAAACAAGACGTG-1 | GSM4626766 | Normal |
| GSM4626766_GCGCCAAACAATCCGAT-1 | GSM4626766 | Normal |
| GSM4626766_GCGCCAAAGTAATCACC-1 | GSM4626766 | Normal |
| GSM4626766_GCGCCAAAGTCTGATCA-1 | GSM4626766 | Normal |
| GSM4626766_GCGCCAAAGTGGTCTCG-1 | GSM4626766 | Normal |
| GSM4626766_GCGCCAATCAACTCTT-1  | GSM4626766 | Normal |
| GSM4626766_GCGCCAATCACGAAGG-1  | GSM4626766 | Normal |
| GSM4626766_GCGCCAATCCACGCAG-1  | GSM4626766 | Normal |
| GSM4626766_GCGCGATAGTGTCCAT-1  | GSM4626766 | Normal |
| GSM4626766_GCGCGATCATATGCTG-1  | GSM4626766 | Normal |
| GSM4626766_GCGCGATCATCTATGG-1  | GSM4626766 | Normal |
| GSM4626766_GCGCGATGTAGGGACT-1  | GSM4626766 | Normal |
| GSM4626766_GCGCGATGTGAGTTT-1   | GSM4626766 | Normal |
| GSM4626766_GCGCGATGTCTCCCTA-1  | GSM4626766 | Normal |
| GSM4626766_GCGCGATGTCTGGAGA-1  | GSM4626766 | Normal |
| GSM4626766_GCGCGATGTTAGATGA-1  | GSM4626766 | Normal |
| GSM4626766_GCGCGATGTTGAGTTC-1  | GSM4626766 | Normal |
| GSM4626766_GCGCGATTCCCTTGCA-1  | GSM4626766 | Normal |
| GSM4626766_GCGCGATTGACAGCC-1   | GSM4626766 | Normal |
| GSM4626766_GCGCGATTGAAACG-1    | GSM4626766 | Normal |
| GSM4626766_GCGCGATTGCGCCGAT-1  | GSM4626766 | Normal |
| GSM4626766_GCGCGATTCTCAAGTG-1  | GSM4626766 | Normal |
| GSM4626766_GCGCGATTCTGGTATG-1  | GSM4626766 | Normal |
| GSM4626766_GCGCGATTCTGTCTAT-1  | GSM4626766 | Normal |
| GSM4626766_GCGGGTTAGCCCAGCT-1  | GSM4626766 | Normal |
| GSM4626766_GCGGGTTAGGGTTTCT-1  | GSM4626766 | Normal |
| GSM4626766_GCGGGTTAGTGTGAAT-1  | GSM4626766 | Normal |
| GSM4626766_GCGGGTTCAACGCACC-1  | GSM4626766 | Normal |
| GSM4626766_GCGGGTTCACAAGTAA-1  | GSM4626766 | Normal |
| GSM4626766_GCGGGTTCAGCCAGAA-1  | GSM4626766 | Normal |
| GSM4626766_GCGGGTTCATCCTAGA-1  | GSM4626766 | Normal |
| GSM4626766_GCGGGTTCATTGGGCC-1  | GSM4626766 | Normal |
| GSM4626766_GCGGGTTGTCGAAAGC-1  | GSM4626766 | Normal |
| GSM4626766_GCGGGTTGTTAAGAAC-1  | GSM4626766 | Normal |
| GSM4626766_GCGGGTTGTTTCAATC-1  | GSM4626766 | Normal |
| GSM4626766_GCGGGTTGTTGTTTGG-1  | GSM4626766 | Normal |
| GSM4626766_GCGGGTTGTTTGCATG-1  | GSM4626766 | Normal |
| GSM4626766_GCGGGTTTTCAGTCCCT-1 | GSM4626766 | Normal |
| GSM4626766_GCGGGTTTTCGACAGCC-1 | GSM4626766 | Normal |
| GSM4626766_GCGGGTTTTCGCCAGCA-1 | GSM4626766 | Normal |
| GSM4626766_GCTCCTAAGATACACA-1  | GSM4626766 | Normal |
| GSM4626766_GCTCCTAAGCGTGAAC-1  | GSM4626766 | Normal |
| GSM4626766_GCTCCTAAGTCCATAC-1  | GSM4626766 | Normal |
| GSM4626766_GCTCCTACAAGGTTCT-1  | GSM4626766 | Normal |
| GSM4626766_GCTCCTACACCTGGTG-1  | GSM4626766 | Normal |

|                                |            |        |
|--------------------------------|------------|--------|
| GSM4626766_GCTCCTACACTTAACG-1  | GSM4626766 | Normal |
| GSM4626766_GCTCCTACATACTACG-1  | GSM4626766 | Normal |
| GSM4626766_GCTCCTACATCACGTA-1  | GSM4626766 | Normal |
| GSM4626766_GCTCCTACATTTGCC-1   | GSM4626766 | Normal |
| GSM4626766_GCTCCTAGTAGCCTAT-1  | GSM4626766 | Normal |
| GSM4626766_GCTCCTAGTCCAAGTT-1  | GSM4626766 | Normal |
| GSM4626766_GCTCCTAGTCGATTGT-1  | GSM4626766 | Normal |
| GSM4626766_GCTCCTATCGAACGGA-1  | GSM4626766 | Normal |
| GSM4626766_GCTCCTATCGTGACAT-1  | GSM4626766 | Normal |
| GSM4626766_GCTCCTATCTACCAGA-1  | GSM4626766 | Normal |
| GSM4626766_GCTCTGTAGTACACCT-1  | GSM4626766 | Normal |
| GSM4626766_GCTCTGTAGTACGATA-1  | GSM4626766 | Normal |
| GSM4626766_GCTCTGTAGTGCAAGC-1  | GSM4626766 | Normal |
| GSM4626766_GCTCTGTCACTTCGAA-1  | GSM4626766 | Normal |
| GSM4626766_GCTCTGTGAGCTGGCT-1  | GSM4626766 | Normal |
| GSM4626766_GCTCTGTGAGCTGTGC-1  | GSM4626766 | Normal |
| GSM4626766_GCTCTGTGATCCGGGT-1  | GSM4626766 | Normal |
| GSM4626766_GCTCTGTGATCCTAGA-1  | GSM4626766 | Normal |
| GSM4626766_GCTCTGTGTACCGTTA-1  | GSM4626766 | Normal |
| GSM4626766_GCTCTGTTCATAGCAC-1  | GSM4626766 | Normal |
| GSM4626766_GCTCTGTTCGCGGATG-1  | GSM4626766 | Normal |
| GSM4626766_GCTCTGTTCGCTACAA-1  | GSM4626766 | Normal |
| GSM4626766_GCTCTGTTCGCGGTT-1   | GSM4626766 | Normal |
| GSM4626766_GCTCTGTTCCTCAAACG-1 | GSM4626766 | Normal |
| GSM4626766_GCTCTGTTCCTCGTATT-1 | GSM4626766 | Normal |
| GSM4626766_GCTGCAGAGCAGATCG-1  | GSM4626766 | Normal |
| GSM4626766_GCTGCAGAGGTGACCA-1  | GSM4626766 | Normal |
| GSM4626766_GCTGCAGAGTGTCCAT-1  | GSM4626766 | Normal |
| GSM4626766_GCTGCAGCAAGTTCT-1   | GSM4626766 | Normal |
| GSM4626766_GCTGCAGCAATCTGCA-1  | GSM4626766 | Normal |
| GSM4626766_GCTGCAGCAATGAATG-1  | GSM4626766 | Normal |
| GSM4626766_GCTGCAGCACAACTGT-1  | GSM4626766 | Normal |
| GSM4626766_GCTGCAGCACTTCGAA-1  | GSM4626766 | Normal |
| GSM4626766_GCTGCAGCATGTAGTC-1  | GSM4626766 | Normal |
| GSM4626766_GCTGCAGGTATCACCA-1  | GSM4626766 | Normal |
| GSM4626766_GCTGCAGGTGATGCCG-1  | GSM4626766 | Normal |
| GSM4626766_GCTGCAGGTCTGATCA-1  | GSM4626766 | Normal |
| GSM4626766_GCTGCAGGTTGAGACT-1  | GSM4626766 | Normal |
| GSM4626766_GCTGCAGTCAAACGGG-1  | GSM4626766 | Normal |
| GSM4626766_GCTGCAGTCGCTTAGA-1  | GSM4626766 | Normal |
| GSM4626766_GCTGCAGTCGGACAAG-1  | GSM4626766 | Normal |
| GSM4626766_GCTGCAGTCGGAGGTA-1  | GSM4626766 | Normal |
| GSM4626766_GCTGCAGTCGTTTAGG-1  | GSM4626766 | Normal |
| GSM4626766_GCTGCAGTCTGCCAGG-1  | GSM4626766 | Normal |
| GSM4626766_GCTGCGAAGCGATTCT-1  | GSM4626766 | Normal |
| GSM4626766_GCTGCGAAGGCAATTA-1  | GSM4626766 | Normal |
| GSM4626766_GCTGCGAAGGTTTCT-1   | GSM4626766 | Normal |
| GSM4626766_GCTGCGACACCATCCT-1  | GSM4626766 | Normal |
| GSM4626766_GCTGCGACACCGCTAG-1  | GSM4626766 | Normal |
| GSM4626766_GCTGCGACACGAAAGC-1  | GSM4626766 | Normal |
| GSM4626766_GCTGCGACAGCCTGTG-1  | GSM4626766 | Normal |
| GSM4626766_GCTGCGACAGCGAACA-1  | GSM4626766 | Normal |
| GSM4626766_GCTGCGACAGACCCT-1   | GSM4626766 | Normal |
| GSM4626766_GCTGCGACAGGTCTCG-1  | GSM4626766 | Normal |
| GSM4626766_GCTGCGACAGTAGAGC-1  | GSM4626766 | Normal |
| GSM4626766_GCTGCGACATGTGAT-1   | GSM4626766 | Normal |
| GSM4626766_GCTGCGACATTTACT-1   | GSM4626766 | Normal |

|                                |            |        |
|--------------------------------|------------|--------|
| GSM4626766_GCTGCGAGTAGCGTCC-1  | GSM4626766 | Normal |
| GSM4626766_GCTGCGAGTCGTTCT-1   | GSM4626766 | Normal |
| GSM4626766_GCTGCGAGTGTGGCTC-1  | GSM4626766 | Normal |
| GSM4626766_GCTGCGATCTAGAGTC-1  | GSM4626766 | Normal |
| GSM4626766_GCTGCTTAGCTGCGAA-1  | GSM4626766 | Normal |
| GSM4626766_GCTGCTTAGTGTACCT-1  | GSM4626766 | Normal |
| GSM4626766_GCTGCTTAGTGTCCCG-1  | GSM4626766 | Normal |
| GSM4626766_GCTGCTTCAAGTCTAC-1  | GSM4626766 | Normal |
| GSM4626766_GCTGCTTCACGCATCG-1  | GSM4626766 | Normal |
| GSM4626766_GCTGCTTCAGCCTTTC-1  | GSM4626766 | Normal |
| GSM4626766_GCTGCTTCAGGCGATA-1  | GSM4626766 | Normal |
| GSM4626766_GCTGCTTGTCAAGCGA-1  | GSM4626766 | Normal |
| GSM4626766_GCTGCTTGTGAAGGCT-1  | GSM4626766 | Normal |
| GSM4626766_GCTGCTTGTGCACGAA-1  | GSM4626766 | Normal |
| GSM4626766_GCTGCTTGTGTGGTTT-1  | GSM4626766 | Normal |
| GSM4626766_GCTGCTTTCAACCATG-1  | GSM4626766 | Normal |
| GSM4626766_GCTGCTTTCTGGTGTA-1  | GSM4626766 | Normal |
| GSM4626766_GCTGGGTAGCGCCTCA-1  | GSM4626766 | Normal |
| GSM4626766_GCTGGGTAGGAGTTGC-1  | GSM4626766 | Normal |
| GSM4626766_GCTGGGTAGGATGGTC-1  | GSM4626766 | Normal |
| GSM4626766_GCTGGGTCAAGCGAGT-1  | GSM4626766 | Normal |
| GSM4626766_GCTGGGTACGGTGTG-1   | GSM4626766 | Normal |
| GSM4626766_GCTGGGTACGGAATCG-1  | GSM4626766 | Normal |
| GSM4626766_GCTGGGTGTAGGACAC-1  | GSM4626766 | Normal |
| GSM4626766_GCTGGGTGTGGCTCCA-1  | GSM4626766 | Normal |
| GSM4626766_GCTGGGTGTGTGACCC-1  | GSM4626766 | Normal |
| GSM4626766_GCTGGGTTCACAGGCC-1  | GSM4626766 | Normal |
| GSM4626766_GCTGGGTTCAGATCA-1   | GSM4626766 | Normal |
| GSM4626766_GCTGGGTTCCTTAATC-1  | GSM4626766 | Normal |
| GSM4626766_GCTGGGTTCGAATGCT-1  | GSM4626766 | Normal |
| GSM4626766_GCTGGGTTCCTTGCAAG-1 | GSM4626766 | Normal |
| GSM4626766_GCTTCCAAGAAGAAGC-1  | GSM4626766 | Normal |
| GSM4626766_GCTTCCAAGACTAGGC-1  | GSM4626766 | Normal |
| GSM4626766_GCTTCCACAAGGTTTC-1  | GSM4626766 | Normal |
| GSM4626766_GCTTCCACAGGCTCAC-1  | GSM4626766 | Normal |
| GSM4626766_GCTTCCAGTACGCTGC-1  | GSM4626766 | Normal |
| GSM4626766_GCTTCCAGTCCAGTGC-1  | GSM4626766 | Normal |
| GSM4626766_GCTTCCAGTGATGCC-1   | GSM4626766 | Normal |
| GSM4626766_GCTTCCATCCCTAATT-1  | GSM4626766 | Normal |
| GSM4626766_GCTTGAAAGCGCCTCA-1  | GSM4626766 | Normal |
| GSM4626766_GCTTGAACAATACGCT-1  | GSM4626766 | Normal |
| GSM4626766_GCTTGAACACCAGGTC-1  | GSM4626766 | Normal |
| GSM4626766_GCTTGAAGTCTTCGTC-1  | GSM4626766 | Normal |
| GSM4626766_GCTTGAAGTTTGGGCC-1  | GSM4626766 | Normal |
| GSM4626766_GCTTGAATCAGTCAGT-1  | GSM4626766 | Normal |
| GSM4626766_GCTTGAATCGCCAAAT-1  | GSM4626766 | Normal |
| GSM4626766_GGAAAGCAGGCTCAGA-1  | GSM4626766 | Normal |
| GSM4626766_GGAAAGCAGGTCGGAT-1  | GSM4626766 | Normal |
| GSM4626766_GGAAAGCAGTAAGTAC-1  | GSM4626766 | Normal |
| GSM4626766_GGAAAGCCAAACCTAC-1  | GSM4626766 | Normal |
| GSM4626766_GGAAAGCCAATAGCGG-1  | GSM4626766 | Normal |
| GSM4626766_GGAAAGCCAGGTCTCG-1  | GSM4626766 | Normal |
| GSM4626766_GGAAAGCCATAAAGGT-1  | GSM4626766 | Normal |
| GSM4626766_GGAAAGCCATGCATGT-1  | GSM4626766 | Normal |
| GSM4626766_GGAAAGCGTGCAGTAG-1  | GSM4626766 | Normal |
| GSM4626766_GGAAAGCGTGCCTGTG-1  | GSM4626766 | Normal |
| GSM4626766_GGAAAGCGTTATCACG-1  | GSM4626766 | Normal |

|                                 |            |        |
|---------------------------------|------------|--------|
| GSM4626766_GGAAAGCTCACGGTTA-1   | GSM4626766 | Normal |
| GSM4626766_GGAAAGCTCCGAACGC-1   | GSM4626766 | Normal |
| GSM4626766_GGAAAGCTCTATCGCC-1   | GSM4626766 | Normal |
| GSM4626766_GGAACTTAGAAGGGTA-1   | GSM4626766 | Normal |
| GSM4626766_GGAACTTAGAGATGAG-1   | GSM4626766 | Normal |
| GSM4626766_GGAACTTAGAGCAATT-1   | GSM4626766 | Normal |
| GSM4626766_GGAACTTAGAGGTTAT-1   | GSM4626766 | Normal |
| GSM4626766_GGAACTTAGCAGCCTC-1   | GSM4626766 | Normal |
| GSM4626766_GGAACTTAGCAGCGTA-1   | GSM4626766 | Normal |
| GSM4626766_GGAACTTAGCCGATTT-1   | GSM4626766 | Normal |
| GSM4626766_GGAACTTAGGCAATTA-1   | GSM4626766 | Normal |
| GSM4626766_GGAACTTAGTACACCT-1   | GSM4626766 | Normal |
| GSM4626766_GGAACTTCAAACAACA-1   | GSM4626766 | Normal |
| GSM4626766_GGAACTTCACCAGATT-1   | GSM4626766 | Normal |
| GSM4626766_GGAACTTCACTGTGTA-1   | GSM4626766 | Normal |
| GSM4626766_GGAACTTCACTGTTAG-1   | GSM4626766 | Normal |
| GSM4626766_GGAACTTGTCATACTG-1   | GSM4626766 | Normal |
| GSM4626766_GGAACTTTCACTCCTG-1   | GSM4626766 | Normal |
| GSM4626766_GGAACTTTCATCGATG-1   | GSM4626766 | Normal |
| GSM4626766_GGAACTTTCCTGCTTG-1   | GSM4626766 | Normal |
| GSM4626766_GGAATAAAGGTGTTAA-1   | GSM4626766 | Normal |
| GSM4626766_GGAATAACAAATACAG-1   | GSM4626766 | Normal |
| GSM4626766_GGAATAACAACACTGGCC-1 | GSM4626766 | Normal |
| GSM4626766_GGAATAACAGATCTGT-1   | GSM4626766 | Normal |
| GSM4626766_GGAATAACATACTACG-1   | GSM4626766 | Normal |
| GSM4626766_GGAATAAGTAGCGATG-1   | GSM4626766 | Normal |
| GSM4626766_GGAATAAGTCAAAGCG-1   | GSM4626766 | Normal |
| GSM4626766_GGAATAAGTGAACCTT-1   | GSM4626766 | Normal |
| GSM4626766_GGAATAATCAGAAATG-1   | GSM4626766 | Normal |
| GSM4626766_GGAATAATCTGGTTCC-1   | GSM4626766 | Normal |
| GSM4626766_GGACAAGAGACGCAAC-1   | GSM4626766 | Normal |
| GSM4626766_GGACAAGAGCCACGTC-1   | GSM4626766 | Normal |
| GSM4626766_GGACAAGAGCTAAACA-1   | GSM4626766 | Normal |
| GSM4626766_GGACAAGAGCTAGTGG-1   | GSM4626766 | Normal |
| GSM4626766_GGACAAGAGGTGCAAC-1   | GSM4626766 | Normal |
| GSM4626766_GGACAAGCAAGCGTAG-1   | GSM4626766 | Normal |
| GSM4626766_GGACAAGCACCTCGTT-1   | GSM4626766 | Normal |
| GSM4626766_GGACAAGCACTGTCCGG-1  | GSM4626766 | Normal |
| GSM4626766_GGACAAGCACTTGAT-1    | GSM4626766 | Normal |
| GSM4626766_GGACAAGCATTTCAGG-1   | GSM4626766 | Normal |
| GSM4626766_GGACAAGGTACCGTAT-1   | GSM4626766 | Normal |
| GSM4626766_GGACAAGGTCTCTTG-1    | GSM4626766 | Normal |
| GSM4626766_GGACAAGGTCTCAACA-1   | GSM4626766 | Normal |
| GSM4626766_GGACAAGGTCTGCCAG-1   | GSM4626766 | Normal |
| GSM4626766_GGACAAGGTGTAAGTA-1   | GSM4626766 | Normal |
| GSM4626766_GGACAAGGTTGCGCAC-1   | GSM4626766 | Normal |
| GSM4626766_GGACAAGTCAACGGCC-1   | GSM4626766 | Normal |
| GSM4626766_GGACAAGTCATAACCG-1   | GSM4626766 | Normal |
| GSM4626766_GGACAGAAGACGCTTT-1   | GSM4626766 | Normal |
| GSM4626766_GGACAGAAGAGCTGCA-1   | GSM4626766 | Normal |
| GSM4626766_GGACAGAAGTGAATTG-1   | GSM4626766 | Normal |
| GSM4626766_GGACAGACACGCTTTC-1   | GSM4626766 | Normal |
| GSM4626766_GGACAGACATAAGACA-1   | GSM4626766 | Normal |
| GSM4626766_GGACAGAGTGAGTGAC-1   | GSM4626766 | Normal |
| GSM4626766_GGACAGAGTGTGCCTG-1   | GSM4626766 | Normal |
| GSM4626766_GGACAGATCCGATATG-1   | GSM4626766 | Normal |
| GSM4626766_GGACAGATCCTCCTAG-1   | GSM4626766 | Normal |

|                                 |            |        |
|---------------------------------|------------|--------|
| GSM4626766_GGACAGATCCTTGCCA-1   | GSM4626766 | Normal |
| GSM4626766_GGACAGATCGATAGAA-1   | GSM4626766 | Normal |
| GSM4626766_GGACAGATCTCCCTGA-1   | GSM4626766 | Normal |
| GSM4626766_GGACATTAGATGCGAC-1   | GSM4626766 | Normal |
| GSM4626766_GGACATTAGGTTACCT-1   | GSM4626766 | Normal |
| GSM4626766_GGACATTAGTATCGAA-1   | GSM4626766 | Normal |
| GSM4626766_GGACATTAGTCTCCTC-1   | GSM4626766 | Normal |
| GSM4626766_GGACATTCACACTGCG-1   | GSM4626766 | Normal |
| GSM4626766_GGACATTCAGATGGGT-1   | GSM4626766 | Normal |
| GSM4626766_GGACATTCATCACAAAC-1  | GSM4626766 | Normal |
| GSM4626766_GGACATTGTCCTAGCG-1   | GSM4626766 | Normal |
| GSM4626766_GGACATTGTTAAGATG-1   | GSM4626766 | Normal |
| GSM4626766_GGACATTTTCAGCGATT-1  | GSM4626766 | Normal |
| GSM4626766_GGACGTCAGATGTTAG-1   | GSM4626766 | Normal |
| GSM4626766_GGACGTCAGGAGTAGA-1   | GSM4626766 | Normal |
| GSM4626766_GGACGTCAGGTACTCT-1   | GSM4626766 | Normal |
| GSM4626766_GGACGTCCTCAAGAAGAG-1 | GSM4626766 | Normal |
| GSM4626766_GGACGTCATGCAACT-1    | GSM4626766 | Normal |
| GSM4626766_GGACGTCGTCAAAGCG-1   | GSM4626766 | Normal |
| GSM4626766_GGACGTCGTGCGGTAA-1   | GSM4626766 | Normal |
| GSM4626766_GGACGTCTCACACCT-1    | GSM4626766 | Normal |
| GSM4626766_GGAGCAAAGGAACTGC-1   | GSM4626766 | Normal |
| GSM4626766_GGAGCAAAGGTGCTTT-1   | GSM4626766 | Normal |
| GSM4626766_GGAGCAAACAATCGGTT-1  | GSM4626766 | Normal |
| GSM4626766_GGAGCAACATCACAAAC-1  | GSM4626766 | Normal |
| GSM4626766_GGAGCAACATTAACCG-1   | GSM4626766 | Normal |
| GSM4626766_GGAGCAAGTAATTGGA-1   | GSM4626766 | Normal |
| GSM4626766_GGAGCAAGTACCGTAT-1   | GSM4626766 | Normal |
| GSM4626766_GGAGCAAGTCATCCCT-1   | GSM4626766 | Normal |
| GSM4626766_GGAGCAAGTGTAAGTA-1   | GSM4626766 | Normal |
| GSM4626766_GGAGCAATCACGCATA-1   | GSM4626766 | Normal |
| GSM4626766_GGAGCAATCTCGATGA-1   | GSM4626766 | Normal |
| GSM4626766_GGAGCAATCTGAAAGA-1   | GSM4626766 | Normal |
| GSM4626766_GGAGCAATCTTAGCCC-1   | GSM4626766 | Normal |
| GSM4626766_GGAGCAATCTTGGGTA-1   | GSM4626766 | Normal |
| GSM4626766_GGATGTTAGAGCCTAG-1   | GSM4626766 | Normal |
| GSM4626766_GGATGTTAGCACCGTC-1   | GSM4626766 | Normal |
| GSM4626766_GGATGTTAGCCAGTTT-1   | GSM4626766 | Normal |
| GSM4626766_GGATGTTAGCGTTGCC-1   | GSM4626766 | Normal |
| GSM4626766_GGATGTTAGTGAAGTT-1   | GSM4626766 | Normal |
| GSM4626766_GGATGTTTCATCACGTA-1  | GSM4626766 | Normal |
| GSM4626766_GGATGTTTCATGTTCTA-1  | GSM4626766 | Normal |
| GSM4626766_GGATGTTGTAGCCTCG-1   | GSM4626766 | Normal |
| GSM4626766_GGATGTTGTATAATGG-1   | GSM4626766 | Normal |
| GSM4626766_GGATGTTGTTGATTCG-1   | GSM4626766 | Normal |
| GSM4626766_GGATGTTGTTTGGCGC-1   | GSM4626766 | Normal |
| GSM4626766_GGATGTTTCAAGATCC-1   | GSM4626766 | Normal |
| GSM4626766_GGATGTTTCAATCACG-1   | GSM4626766 | Normal |
| GSM4626766_GGATGTTTTCATCGCTC-1  | GSM4626766 | Normal |
| GSM4626766_GGATGTTTCCCTGACT-1   | GSM4626766 | Normal |
| GSM4626766_GGATGTTTCTCAATT-1    | GSM4626766 | Normal |
| GSM4626766_GGATGTTTCCGCAAAT-1   | GSM4626766 | Normal |
| GSM4626766_GGATGTTTCTACCTGC-1   | GSM4626766 | Normal |
| GSM4626766_GGATGTTTCTTCGAGA-1   | GSM4626766 | Normal |
| GSM4626766_GGATTACAGATCGGGT-1   | GSM4626766 | Normal |
| GSM4626766_GGATTACAGTGCGATG-1   | GSM4626766 | Normal |
| GSM4626766_GGATTACCAGCTATTG-1   | GSM4626766 | Normal |

|                                |            |        |
|--------------------------------|------------|--------|
| GSM4626766_GGATTACGTAAGAGGA-1  | GSM4626766 | Normal |
| GSM4626766_GGATTACTCACAGTAC-1  | GSM4626766 | Normal |
| GSM4626766_GGATTACTCCTAGGGC-1  | GSM4626766 | Normal |
| GSM4626766_GGCAATTAGAAGGTTT-1  | GSM4626766 | Normal |
| GSM4626766_GGCAATTAGCTGCAAG-1  | GSM4626766 | Normal |
| GSM4626766_GGCAATTAGGATGGTC-1  | GSM4626766 | Normal |
| GSM4626766_GGCAATTAGTCCCACG-1  | GSM4626766 | Normal |
| GSM4626766_GGCAATTGTTATGCGT-1  | GSM4626766 | Normal |
| GSM4626766_GGCAATTGTTCCAACA-1  | GSM4626766 | Normal |
| GSM4626766_GGCAATTGTTGGACCC-1  | GSM4626766 | Normal |
| GSM4626766_GGCAATTTACGAAGG-1   | GSM4626766 | Normal |
| GSM4626766_GGCAATTTTCATCTGTT-1 | GSM4626766 | Normal |
| GSM4626766_GGCAATTTCCGCGCAA-1  | GSM4626766 | Normal |
| GSM4626766_GGCAATTTTCGGAATA-1  | GSM4626766 | Normal |
| GSM4626766_GGCAATTTTCGGACAAG-1 | GSM4626766 | Normal |
| GSM4626766_GGCCGATAGCCAGGAT-1  | GSM4626766 | Normal |
| GSM4626766_GGCCGATCATCTCCCA-1  | GSM4626766 | Normal |
| GSM4626766_GGCCGATCATTGGGCC-1  | GSM4626766 | Normal |
| GSM4626766_GGCCGATGTAATTGGA-1  | GSM4626766 | Normal |
| GSM4626766_GGCCGATGTCAGGACA-1  | GSM4626766 | Normal |
| GSM4626766_GGCCGATGTCCAATA-1   | GSM4626766 | Normal |
| GSM4626766_GGCCGATGTGGAAGA-1   | GSM4626766 | Normal |
| GSM4626766_GGCCGATGTTACGCGC-1  | GSM4626766 | Normal |
| GSM4626766_GGCCGATGTTACTGAC-1  | GSM4626766 | Normal |
| GSM4626766_GGCCGATTCAAGAAGT-1  | GSM4626766 | Normal |
| GSM4626766_GGCCGATTCCATTCTA-1  | GSM4626766 | Normal |
| GSM4626766_GGCGACTAGATGTTAG-1  | GSM4626766 | Normal |
| GSM4626766_GGCGACTAGCAATATG-1  | GSM4626766 | Normal |
| GSM4626766_GGCGACTAGCCAGTAG-1  | GSM4626766 | Normal |
| GSM4626766_GGCGACTAGCCAGTTT-1  | GSM4626766 | Normal |
| GSM4626766_GGCGACTAGGATGGAA-1  | GSM4626766 | Normal |
| GSM4626766_GGCGACTAGTTATCGC-1  | GSM4626766 | Normal |
| GSM4626766_GGCGACTCACAGACTT-1  | GSM4626766 | Normal |
| GSM4626766_GGCGACTCACAGGCCT-1  | GSM4626766 | Normal |
| GSM4626766_GGCGACTCATTACGAC-1  | GSM4626766 | Normal |
| GSM4626766_GGCGACTGTATAATGG-1  | GSM4626766 | Normal |
| GSM4626766_GGCGACTGTCGCATAT-1  | GSM4626766 | Normal |
| GSM4626766_GGCGACTGTCGTCTTC-1  | GSM4626766 | Normal |
| GSM4626766_GGCGACTGTCTAAACC-1  | GSM4626766 | Normal |
| GSM4626766_GGCGACTGTCTTTTCAT-1 | GSM4626766 | Normal |
| GSM4626766_GGCGACTGTTTGTTTC-1  | GSM4626766 | Normal |
| GSM4626766_GGCGACTTCGGCTACG-1  | GSM4626766 | Normal |
| GSM4626766_GGCGACTTCTATCCCG-1  | GSM4626766 | Normal |
| GSM4626766_GGCGACTTCTGCGGCA-1  | GSM4626766 | Normal |
| GSM4626766_GGCGTGTAGGTAGCCA-1  | GSM4626766 | Normal |
| GSM4626766_GGCGTGTAGGTCCAC-1   | GSM4626766 | Normal |
| GSM4626766_GGCGTGTAGTACGA-1    | GSM4626766 | Normal |
| GSM4626766_GGCGTGTGTTGTGGCC-1  | GSM4626766 | Normal |
| GSM4626766_GGCGTGTTCAGTTCA-1   | GSM4626766 | Normal |
| GSM4626766_GGCGTGTTCAGGACC-1   | GSM4626766 | Normal |
| GSM4626766_GGCTCGAAGACTTTTCG-1 | GSM4626766 | Normal |
| GSM4626766_GGCTCGAAGCAGGCTA-1  | GSM4626766 | Normal |
| GSM4626766_GGCTCGAAGGACATTA-1  | GSM4626766 | Normal |
| GSM4626766_GGCTCGAAGGCTAGGT-1  | GSM4626766 | Normal |
| GSM4626766_GGCTCGACAAGTGGCC-1  | GSM4626766 | Normal |
| GSM4626766_GGCTCGACAGGCTGAA-1  | GSM4626766 | Normal |
| GSM4626766_GGCTCGACAGGGATTG-1  | GSM4626766 | Normal |



|                                |            |        |
|--------------------------------|------------|--------|
| GSM4626766_GGCTCGACAGGTCCAC-1  | GSM4626766 | Normal |
| GSM4626766_GGCTCGACATGCCCGA-1  | GSM4626766 | Normal |
| GSM4626766_GGCTCGAGTAAGTGTA-1  | GSM4626766 | Normal |
| GSM4626766_GGCTCGAGTCTCTTAT-1  | GSM4626766 | Normal |
| GSM4626766_GGCTCGAGTGACGCCT-1  | GSM4626766 | Normal |
| GSM4626766_GGCTCGATCACCCCTCA-1 | GSM4626766 | Normal |
| GSM4626766_GGCTCGATCGATCCCT-1  | GSM4626766 | Normal |
| GSM4626766_GGCTCGATCTGAAAGA-1  | GSM4626766 | Normal |
| GSM4626766_GGCTCGATCTGTCTCG-1  | GSM4626766 | Normal |
| GSM4626766_GGCTGGTAGAATAGGG-1  | GSM4626766 | Normal |
| GSM4626766_GGCTGGTAGGCGTACA-1  | GSM4626766 | Normal |
| GSM4626766_GGCTGGTAGGTGACCA-1  | GSM4626766 | Normal |
| GSM4626766_GGCTGGTCAATAGAGT-1  | GSM4626766 | Normal |
| GSM4626766_GGCTGGTCAATCGAAA-1  | GSM4626766 | Normal |
| GSM4626766_GGCTGGTGTATGGTTC-1  | GSM4626766 | Normal |
| GSM4626766_GGCTGGTGTCTAACGT-1  | GSM4626766 | Normal |
| GSM4626766_GGCTGGTTCGCTAGCG-1  | GSM4626766 | Normal |
| GSM4626766_GGCTGGTTCCTTAGGG-1  | GSM4626766 | Normal |
| GSM4626766_GGGAATGAGTTGTAGA-1  | GSM4626766 | Normal |
| GSM4626766_GGGAATGCAGGCGATA-1  | GSM4626766 | Normal |
| GSM4626766_GGGAATGCAGTAAGCG-1  | GSM4626766 | Normal |
| GSM4626766_GGGAATGCATAGACTC-1  | GSM4626766 | Normal |
| GSM4626766_GGGAATGGTACAGCAG-1  | GSM4626766 | Normal |
| GSM4626766_GGGAATGGTCGAGATG-1  | GSM4626766 | Normal |
| GSM4626766_GGGAATGGTCTTCGTC-1  | GSM4626766 | Normal |
| GSM4626766_GGGAATGGTTTAGGAA-1  | GSM4626766 | Normal |
| GSM4626766_GGGAATGTCAACCATG-1  | GSM4626766 | Normal |
| GSM4626766_GGGAATGTCACCAGGC-1  | GSM4626766 | Normal |
| GSM4626766_GGGAATGTCGGCTTGG-1  | GSM4626766 | Normal |
| GSM4626766_GGGAATGTCTTGTGTTG-1 | GSM4626766 | Normal |
| GSM4626766_GGGACCTAGTGCGATG-1  | GSM4626766 | Normal |
| GSM4626766_GGGACCTGTCTCCATC-1  | GSM4626766 | Normal |
| GSM4626766_GGGACCTTCACCATAG-1  | GSM4626766 | Normal |
| GSM4626766_GGGACCTTCATAACCG-1  | GSM4626766 | Normal |
| GSM4626766_GGGAGATAGATGCCTT-1  | GSM4626766 | Normal |
| GSM4626766_GGGAGATAGCGGCTTC-1  | GSM4626766 | Normal |
| GSM4626766_GGGAGATAGCTCAACT-1  | GSM4626766 | Normal |
| GSM4626766_GGGAGATCAACTTGAC-1  | GSM4626766 | Normal |
| GSM4626766_GGGAGATCAAGTCATC-1  | GSM4626766 | Normal |
| GSM4626766_GGGAGATGTCGGCATC-1  | GSM4626766 | Normal |
| GSM4626766_GGGAGATTCCAAGAT-1   | GSM4626766 | Normal |
| GSM4626766_GGGATGAAGCTAACTC-1  | GSM4626766 | Normal |
| GSM4626766_GGGATGAAGGGTTTCT-1  | GSM4626766 | Normal |
| GSM4626766_GGGATGAAGTTGAGTA-1  | GSM4626766 | Normal |
| GSM4626766_GGGATGACATAAAGGT-1  | GSM4626766 | Normal |
| GSM4626766_GGGATGAGTCACCTAA-1  | GSM4626766 | Normal |
| GSM4626766_GGGATGAGTCGGGTCT-1  | GSM4626766 | Normal |
| GSM4626766_GGGATGAGTGTTGAGG-1  | GSM4626766 | Normal |
| GSM4626766_GGGATGATCAACGCTA-1  | GSM4626766 | Normal |
| GSM4626766_GGGATGATCGAACGGA-1  | GSM4626766 | Normal |
| GSM4626766_GGGATGATCTCTGCTG-1  | GSM4626766 | Normal |
| GSM4626766_GGGCACTAGACACGAC-1  | GSM4626766 | Normal |
| GSM4626766_GGGCACTAGAGGTTAT-1  | GSM4626766 | Normal |
| GSM4626766_GGGCACTAGCTAAACA-1  | GSM4626766 | Normal |
| GSM4626766_GGGCACTCAGTGGGAT-1  | GSM4626766 | Normal |
| GSM4626766_GGGCACTCATATGCTG-1  | GSM4626766 | Normal |
| GSM4626766_GGGCACTCATCCGTGG-1  | GSM4626766 | Normal |

|                                |            |        |
|--------------------------------|------------|--------|
| GSM4626766_GGGCACTCATGTTGAC-1  | GSM4626766 | Normal |
| GSM4626766_GGGCACTGTAACGACG-1  | GSM4626766 | Normal |
| GSM4626766_GGGCACTGTAGCTAAA-1  | GSM4626766 | Normal |
| GSM4626766_GGGCACTGTAGCTCCG-1  | GSM4626766 | Normal |
| GSM4626766_GGGCACTGTAGCTTGT-1  | GSM4626766 | Normal |
| GSM4626766_GGGCACTGTCTCCATC-1  | GSM4626766 | Normal |
| GSM4626766_GGGCACTGTCTGGTCG-1  | GSM4626766 | Normal |
| GSM4626766_GGGCACTGTTACCAGT-1  | GSM4626766 | Normal |
| GSM4626766_GGGCACTGTTATCACG-1  | GSM4626766 | Normal |
| GSM4626766_GGGCACTGTTGACGTT-1  | GSM4626766 | Normal |
| GSM4626766_GGGCACTGTTTACTCT-1  | GSM4626766 | Normal |
| GSM4626766_GGGCACTGTTTGTGG-1   | GSM4626766 | Normal |
| GSM4626766_GGGCACTTCAAACAAG-1  | GSM4626766 | Normal |
| GSM4626766_GGGCACTTCAGTCAGT-1  | GSM4626766 | Normal |
| GSM4626766_GGGCACTTCCGAACGC-1  | GSM4626766 | Normal |
| GSM4626766_GGGCACTTCGTTTAGG-1  | GSM4626766 | Normal |
| GSM4626766_GGGCATCAGAGTGACC-1  | GSM4626766 | Normal |
| GSM4626766_GGGCATCAGCCACGTC-1  | GSM4626766 | Normal |
| GSM4626766_GGGCATCAGGATGGAA-1  | GSM4626766 | Normal |
| GSM4626766_GGGCATCCAAGTAATG-1  | GSM4626766 | Normal |
| GSM4626766_GGGCATCCACGGTAGA-1  | GSM4626766 | Normal |
| GSM4626766_GGGCATCTCCGAACGC-1  | GSM4626766 | Normal |
| GSM4626766_GGGCATCTCGGTGTTA-1  | GSM4626766 | Normal |
| GSM4626766_GGGCATCTCTGCTGTC-1  | GSM4626766 | Normal |
| GSM4626766_GGGTCTGAGAGACTAT-1  | GSM4626766 | Normal |
| GSM4626766_GGGTCTGAGAGTACCG-1  | GSM4626766 | Normal |
| GSM4626766_GGGTCTGCATCCGCGA-1  | GSM4626766 | Normal |
| GSM4626766_GGGTCTGGTGTTTGTG-1  | GSM4626766 | Normal |
| GSM4626766_GGGTCTGGTTCCTTG-1   | GSM4626766 | Normal |
| GSM4626766_GGGTCTGTCAAACAAG-1  | GSM4626766 | Normal |
| GSM4626766_GGGTCTGTCCCTATGTT-1 | GSM4626766 | Normal |
| GSM4626766_GGGTCTGTCCCTCAATT-1 | GSM4626766 | Normal |
| GSM4626766_GGGTTGCAGTCCATAC-1  | GSM4626766 | Normal |
| GSM4626766_GGGTTGCCACCTATCC-1  | GSM4626766 | Normal |
| GSM4626766_GGGTTGCCAGTCAGAG-1  | GSM4626766 | Normal |
| GSM4626766_GGGTTGCCATCACCT-1   | GSM4626766 | Normal |
| GSM4626766_GGGTTGCGTATTCGTG-1  | GSM4626766 | Normal |
| GSM4626766_GGGTTGCGTGCTCTTC-1  | GSM4626766 | Normal |
| GSM4626766_GGGTTGCGTTACGCGC-1  | GSM4626766 | Normal |
| GSM4626766_GGGTTGCTCACAAACC-1  | GSM4626766 | Normal |
| GSM4626766_GGGTTGCTCAGCGACC-1  | GSM4626766 | Normal |
| GSM4626766_GGGTTGCTCCGCTGTT-1  | GSM4626766 | Normal |
| GSM4626766_GGTATTGAGTGAATTG-1  | GSM4626766 | Normal |
| GSM4626766_GGTATTGAGTGAATTG-1  | GSM4626766 | Normal |
| GSM4626766_GGTATTGAGTGGTAGC-1  | GSM4626766 | Normal |
| GSM4626766_GGTATTGCAAGCGAGT-1  | GSM4626766 | Normal |
| GSM4626766_GGTATTGCACTAAGTC-1  | GSM4626766 | Normal |
| GSM4626766_GGTATTGCAGAAGCAC-1  | GSM4626766 | Normal |
| GSM4626766_GGTATTGCATAAGACA-1  | GSM4626766 | Normal |
| GSM4626766_GGTATTGCATGGGAAC-1  | GSM4626766 | Normal |
| GSM4626766_GGTATTGCATGTCCTC-1  | GSM4626766 | Normal |
| GSM4626766_GGTATTGGTCCTGCTT-1  | GSM4626766 | Normal |
| GSM4626766_GGTATTGGTGCAGGTA-1  | GSM4626766 | Normal |
| GSM4626766_GGTATTGTCCCTCTTT-1  | GSM4626766 | Normal |
| GSM4626766_GGTATTGTCGAAACG-1   | GSM4626766 | Normal |
| GSM4626766_GGTGAAGAGACTGGGT-1  | GSM4626766 | Normal |
| GSM4626766_GGTGAAGAGATGTAAC-1  | GSM4626766 | Normal |

|                                |            |        |
|--------------------------------|------------|--------|
| GSM4626766_GGTGAAGAGGAGTCTG-1  | GSM4626766 | Normal |
| GSM4626766_GGTGAAGCACTGTTAG-1  | GSM4626766 | Normal |
| GSM4626766_GGTGAAGCAGGGCATA-1  | GSM4626766 | Normal |
| GSM4626766_GGTGAAGCATCACCT-1   | GSM4626766 | Normal |
| GSM4626766_GGTGAAGGTAGCAAAT-1  | GSM4626766 | Normal |
| GSM4626766_GGTGAAGGTCCGAATT-1  | GSM4626766 | Normal |
| GSM4626766_GGTGAAGGTCCGCTCA-1  | GSM4626766 | Normal |
| GSM4626766_GGTGAAGGTGACTACT-1  | GSM4626766 | Normal |
| GSM4626766_GGTGAAGGTGAGTGAC-1  | GSM4626766 | Normal |
| GSM4626766_GGTGAAGTCCAGAGGA-1  | GSM4626766 | Normal |
| GSM4626766_GGTGAAGTCCCTCAGT-1  | GSM4626766 | Normal |
| GSM4626766_GGTGAAGTCGACCAGC-1  | GSM4626766 | Normal |
| GSM4626766_GGTGAAGTCGTATCAG-1  | GSM4626766 | Normal |
| GSM4626766_GGTGAAGTCGTCCAGG-1  | GSM4626766 | Normal |
| GSM4626766_GGTGCGTAGAAGAAGC-1  | GSM4626766 | Normal |
| GSM4626766_GGTGCGTAGCCGGTAA-1  | GSM4626766 | Normal |
| GSM4626766_GGTGCGTAGCTGAACG-1  | GSM4626766 | Normal |
| GSM4626766_GGTGCGTAGGTCGGAT-1  | GSM4626766 | Normal |
| GSM4626766_GGTGCGTAGTAATCCC-1  | GSM4626766 | Normal |
| GSM4626766_GGTGCGTCACCCTATC-1  | GSM4626766 | Normal |
| GSM4626766_GGTGCGTCAGCAGTTT-1  | GSM4626766 | Normal |
| GSM4626766_GGTGCGTCAGGCGATA-1  | GSM4626766 | Normal |
| GSM4626766_GGTGCGTCAGTATCTG-1  | GSM4626766 | Normal |
| GSM4626766_GGTGCGTGTAACGGCT-1  | GSM4626766 | Normal |
| GSM4626766_GGTGCGTGCTAGTGT-1   | GSM4626766 | Normal |
| GSM4626766_GGTGCGTGCTCCACT-1   | GSM4626766 | Normal |
| GSM4626766_GGTGCGTGTTGACCC-1   | GSM4626766 | Normal |
| GSM4626766_GGTGCGTGTTTAAGCC-1  | GSM4626766 | Normal |
| GSM4626766_GGTGCGTCTGTTTGT-1   | GSM4626766 | Normal |
| GSM4626766_GGTGCGTCTTTACGT-1   | GSM4626766 | Normal |
| GSM4626766_GGTGTTAAGACTTTTCG-1 | GSM4626766 | Normal |
| GSM4626766_GGTGTTAAGCTCCTCT-1  | GSM4626766 | Normal |
| GSM4626766_GGTGTTAAGTGTAAT-1   | GSM4626766 | Normal |
| GSM4626766_GGTGTTAAGTTACCCA-1  | GSM4626766 | Normal |
| GSM4626766_GGTGTTACAATGTAAG-1  | GSM4626766 | Normal |
| GSM4626766_GGTGTTACAGGAATGC-1  | GSM4626766 | Normal |
| GSM4626766_GGTGTTACATCGGTTA-1  | GSM4626766 | Normal |
| GSM4626766_GGTGTTACATGACATC-1  | GSM4626766 | Normal |
| GSM4626766_GGTGTTACATTAACCG-1  | GSM4626766 | Normal |
| GSM4626766_GGTGTTAGTACGAAAT-1  | GSM4626766 | Normal |
| GSM4626766_GGTGTTAGTCTAGTGT-1  | GSM4626766 | Normal |
| GSM4626766_GGTGTTATCCAACTG-1   | GSM4626766 | Normal |
| GSM4626766_GGTGTTATCCAACCA-1   | GSM4626766 | Normal |
| GSM4626766_GGTGTTATCCTAGGGC-1  | GSM4626766 | Normal |
| GSM4626766_GGTGTTATCTCTAGGA-1  | GSM4626766 | Normal |
| GSM4626766_GTAACGTAGGACTGGT-1  | GSM4626766 | Normal |
| GSM4626766_GTAACGTAGGGTCGAT-1  | GSM4626766 | Normal |
| GSM4626766_GTAACGTAGTAAGTAC-1  | GSM4626766 | Normal |
| GSM4626766_GTAACGTAGTGTGGCA-1  | GSM4626766 | Normal |
| GSM4626766_GTAACGTCAAACGTGG-1  | GSM4626766 | Normal |
| GSM4626766_GTAACGTCAATTCCTT-1  | GSM4626766 | Normal |
| GSM4626766_GTAACGTGTGTGAAAT-1  | GSM4626766 | Normal |
| GSM4626766_GTAACGTGTGTGCGTC-1  | GSM4626766 | Normal |
| GSM4626766_GTAACGTGTTCCACGG-1  | GSM4626766 | Normal |
| GSM4626766_GTAACGTGTTTGCGC-1   | GSM4626766 | Normal |
| GSM4626766_GTAACGTTCAGGCGAA-1  | GSM4626766 | Normal |
| GSM4626766_GTAACGTTCAGTACGT-1  | GSM4626766 | Normal |

|                                |            |        |
|--------------------------------|------------|--------|
| GSM4626766_GTAACGTTTCATGCAAC-1 | GSM4626766 | Normal |
| GSM4626766_GTAACGTTTCGTACGGC-1 | GSM4626766 | Normal |
| GSM4626766_GTAACGTTTCGTACGG-1  | GSM4626766 | Normal |
| GSM4626766_GTAAGTGGAGAGTTGGC-1 | GSM4626766 | Normal |
| GSM4626766_GTAAGTGGAGCGCTTAT-1 | GSM4626766 | Normal |
| GSM4626766_GTAAGTGGCAATGTTGC-1 | GSM4626766 | Normal |
| GSM4626766_GTAAGTGGCACTTACGA-1 | GSM4626766 | Normal |
| GSM4626766_GTAAGTGGTAATAGCA-1  | GSM4626766 | Normal |
| GSM4626766_GTAAGTGGTCCGAATT-1  | GSM4626766 | Normal |
| GSM4626766_GTAAGTGGTGAGGGAG-1  | GSM4626766 | Normal |
| GSM4626766_GTAAGTGGTGGTGTAG-1  | GSM4626766 | Normal |
| GSM4626766_GTAAGTGGTGTACAG-1   | GSM4626766 | Normal |
| GSM4626766_GTAAGTGGTCTTTACAC-1 | GSM4626766 | Normal |
| GSM4626766_GTACGTAAGCTGGAAC-1  | GSM4626766 | Normal |
| GSM4626766_GTACGTAAGGGCTTCC-1  | GSM4626766 | Normal |
| GSM4626766_GTACGTAAGGTAAACT-1  | GSM4626766 | Normal |
| GSM4626766_GTACGTACAACCGCCA-1  | GSM4626766 | Normal |
| GSM4626766_GTACGTACATCGGTTA-1  | GSM4626766 | Normal |
| GSM4626766_GTACTCCAGAGCCTAG-1  | GSM4626766 | Normal |
| GSM4626766_GTACTCCAGTGACATA-1  | GSM4626766 | Normal |
| GSM4626766_GTACTCCAGTGCGATG-1  | GSM4626766 | Normal |
| GSM4626766_GTACTCCAGTTCGCGC-1  | GSM4626766 | Normal |
| GSM4626766_GTACTCCCAACCGCCA-1  | GSM4626766 | Normal |
| GSM4626766_GTACTCCCAAGCCCAC-1  | GSM4626766 | Normal |
| GSM4626766_GTACTCCCACTGAAGG-1  | GSM4626766 | Normal |
| GSM4626766_GTACTCCCATTGTGCA-1  | GSM4626766 | Normal |
| GSM4626766_GTACTCCGTGCAACGA-1  | GSM4626766 | Normal |
| GSM4626766_GTACTCCGTTCACCTC-1  | GSM4626766 | Normal |
| GSM4626766_GTACTCCTCCAAATGC-1  | GSM4626766 | Normal |
| GSM4626766_GTACTCCTCGCGTAGC-1  | GSM4626766 | Normal |
| GSM4626766_GTACTCCTCTTAACT-1   | GSM4626766 | Normal |
| GSM4626766_GTACTCCTCTTCTCCTC-1 | GSM4626766 | Normal |
| GSM4626766_GTACTTTAGACAGACC-1  | GSM4626766 | Normal |
| GSM4626766_GTACTTTCAAAGGTGC-1  | GSM4626766 | Normal |
| GSM4626766_GTACTTTCAATAGCGG-1  | GSM4626766 | Normal |
| GSM4626766_GTACTTTTCATCCAACA-1 | GSM4626766 | Normal |
| GSM4626766_GTACTTTTCAAAGTAG-1  | GSM4626766 | Normal |
| GSM4626766_GTACTTTTCAAGCCTA-1  | GSM4626766 | Normal |
| GSM4626766_GTACTTTTTCATGTAGC-1 | GSM4626766 | Normal |
| GSM4626766_GTAGGCCAGGGATCTG-1  | GSM4626766 | Normal |
| GSM4626766_GTAGGCCACCTCGGA-1   | GSM4626766 | Normal |
| GSM4626766_GTAGGCCATGACATC-1   | GSM4626766 | Normal |
| GSM4626766_GTAGGCCGTGCGAAAC-1  | GSM4626766 | Normal |
| GSM4626766_GTAGGCCCTCAACTG-1   | GSM4626766 | Normal |
| GSM4626766_GTAGTCAAGAGGGCTT-1  | GSM4626766 | Normal |
| GSM4626766_GTAGTCAAGCGCTCCA-1  | GSM4626766 | Normal |
| GSM4626766_GTAGTCAAGCTGAAAT-1  | GSM4626766 | Normal |
| GSM4626766_GTAGTCAAGCTGAACG-1  | GSM4626766 | Normal |
| GSM4626766_GTAGTCAAGTGAATTG-1  | GSM4626766 | Normal |
| GSM4626766_GTAGTCACACCAGGCT-1  | GSM4626766 | Normal |
| GSM4626766_GTAGTCACAGCCAGAA-1  | GSM4626766 | Normal |
| GSM4626766_GTAGTCACATAAAGGT-1  | GSM4626766 | Normal |
| GSM4626766_GTAGTCAGTGTCTGAT-1  | GSM4626766 | Normal |
| GSM4626766_GTAGTCATCCAGTAGT-1  | GSM4626766 | Normal |
| GSM4626766_GTAGTCATCGAATGGG-1  | GSM4626766 | Normal |
| GSM4626766_GTAGTCATCGAAACT-1   | GSM4626766 | Normal |
| GSM4626766_GTAGTCATCGCACTCT-1  | GSM4626766 | Normal |

|                               |            |        |
|-------------------------------|------------|--------|
| GSM4626766_GTATCTTAGGAATGGA-1 | GSM4626766 | Normal |
| GSM4626766_GTATCTTAGGAGCGAG-1 | GSM4626766 | Normal |
| GSM4626766_GTATCTTAGGTGCTAG-1 | GSM4626766 | Normal |
| GSM4626766_GTATCTTAGTACCGGA-1 | GSM4626766 | Normal |
| GSM4626766_GTATCTTAGTCGATAA-1 | GSM4626766 | Normal |
| GSM4626766_GTATCTTTCCTGCAGG-1 | GSM4626766 | Normal |
| GSM4626766_GTATCTTTCGATCCCT-1 | GSM4626766 | Normal |
| GSM4626766_GTATTCTAGCTGCCCA-1 | GSM4626766 | Normal |
| GSM4626766_GTATTCTAGTGTTAGA-1 | GSM4626766 | Normal |
| GSM4626766_GTATTCTAGTTGTAGA-1 | GSM4626766 | Normal |
| GSM4626766_GTATTCTCAACCGCCA-1 | GSM4626766 | Normal |
| GSM4626766_GTATTCTCATACAAC-1  | GSM4626766 | Normal |
| GSM4626766_GTATTCTGTGAGTGAC-1 | GSM4626766 | Normal |
| GSM4626766_GTATTCTGTGATGCC-1  | GSM4626766 | Normal |
| GSM4626766_GTATTCTTCAGCGATT-1 | GSM4626766 | Normal |
| GSM4626766_GTATTCTTCGAGAACG-1 | GSM4626766 | Normal |
| GSM4626766_GTCAAGTAGGACTGGT-1 | GSM4626766 | Normal |
| GSM4626766_GTCAAGTAGTACATGA-1 | GSM4626766 | Normal |
| GSM4626766_GTCAAGTAGTAGCGGT-1 | GSM4626766 | Normal |
| GSM4626766_GTCAAGTAGTATTGGA-1 | GSM4626766 | Normal |
| GSM4626766_GTCAAGTAGTGGTAGC-1 | GSM4626766 | Normal |
| GSM4626766_GTCAAGTCAAACCTAC-1 | GSM4626766 | Normal |
| GSM4626766_GTCAAGTCACATTCGA-1 | GSM4626766 | Normal |
| GSM4626766_GTCAAGTCACTGTTAG-1 | GSM4626766 | Normal |
| GSM4626766_GTCAAGTGTAGATTAG-1 | GSM4626766 | Normal |
| GSM4626766_GTCAAGTGTTACGGC-1  | GSM4626766 | Normal |
| GSM4626766_GTCAAGTTCGGTTGTC-1 | GSM4626766 | Normal |
| GSM4626766_GTCAAGTTCATTCA-1   | GSM4626766 | Normal |
| GSM4626766_GTCACAAAGCAATATG-1 | GSM4626766 | Normal |
| GSM4626766_GTCACAAAGTACACCT-1 | GSM4626766 | Normal |
| GSM4626766_GTCACAAAGTATGACA-1 | GSM4626766 | Normal |
| GSM4626766_GTCACAACACATGT-1   | GSM4626766 | Normal |
| GSM4626766_GTCACAACAGCGTCCA-1 | GSM4626766 | Normal |
| GSM4626766_GTCACAACAGCTGTTA-1 | GSM4626766 | Normal |
| GSM4626766_GTCACAAGTAGCTGCC-1 | GSM4626766 | Normal |
| GSM4626766_GTCACAAGTGGCAAAC-1 | GSM4626766 | Normal |
| GSM4626766_GTCACAAGTTGAGGTG-1 | GSM4626766 | Normal |
| GSM4626766_GTCACAATCACTGGGC-1 | GSM4626766 | Normal |
| GSM4626766_GTCACAATCATCTGTT-1 | GSM4626766 | Normal |
| GSM4626766_GTCACAATCCACGCAG-1 | GSM4626766 | Normal |
| GSM4626766_GTCACAATCGTCACGG-1 | GSM4626766 | Normal |
| GSM4626766_GTCACAATCTGCGACG-1 | GSM4626766 | Normal |
| GSM4626766_GTCACGGCACGAGGTA-1 | GSM4626766 | Normal |
| GSM4626766_GTCACGGGTCGACTAT-1 | GSM4626766 | Normal |
| GSM4626766_GTCACGGTCAACGCTA-1 | GSM4626766 | Normal |
| GSM4626766_GTCACGGTCAAGGTAA-1 | GSM4626766 | Normal |
| GSM4626766_GTCACGGTCAGCTCGG-1 | GSM4626766 | Normal |
| GSM4626766_GTCACGGTCCACGAAT-1 | GSM4626766 | Normal |
| GSM4626766_GTCATTTAGATATACG-1 | GSM4626766 | Normal |
| GSM4626766_GTCATTTAGTGTTTGC-1 | GSM4626766 | Normal |
| GSM4626766_GTCATTTGTCCGAACC-1 | GSM4626766 | Normal |
| GSM4626766_GTCATTTGTCCCATG-1  | GSM4626766 | Normal |
| GSM4626766_GTCATTTTCATCATTC-1 | GSM4626766 | Normal |
| GSM4626766_GTCATTTTCATGCATG-1 | GSM4626766 | Normal |
| GSM4626766_GTCATTTTCCGTAGGC-1 | GSM4626766 | Normal |
| GSM4626766_GTCATTTTCTATTCA-1  | GSM4626766 | Normal |
| GSM4626766_GTCCTCAAGTCTCAAC-1 | GSM4626766 | Normal |

|                               |            |        |
|-------------------------------|------------|--------|
| GSM4626766_GTCCTCACACGTGAGA-1 | GSM4626766 | Normal |
| GSM4626766_GTCCTCACACTATCTT-1 | GSM4626766 | Normal |
| GSM4626766_GTCCTCACATATGCTG-1 | GSM4626766 | Normal |
| GSM4626766_GTCCTCACATCAGTAC-1 | GSM4626766 | Normal |
| GSM4626766_GTCCTCAGTATAATGG-1 | GSM4626766 | Normal |
| GSM4626766_GTCCTCAGTCTCCACT-1 | GSM4626766 | Normal |
| GSM4626766_GTCCTCAGTTGCGTTA-1 | GSM4626766 | Normal |
| GSM4626766_GTCCTCATCATCGGAT-1 | GSM4626766 | Normal |
| GSM4626766_GTCCTCATCCAAACTG-1 | GSM4626766 | Normal |
| GSM4626766_GTCCTCATCCACGTTT-1 | GSM4626766 | Normal |
| GSM4626766_GTCCTCATCCGCGGTA-1 | GSM4626766 | Normal |
| GSM4626766_GTCCTCATCTATTCA-1  | GSM4626766 | Normal |
| GSM4626766_GTCCTCATCGTACCGG-1 | GSM4626766 | Normal |
| GSM4626766_GTCCTCATCTGCCCTA-1 | GSM4626766 | Normal |
| GSM4626766_GTCCTCATCTGTCAAG-1 | GSM4626766 | Normal |
| GSM4626766_GTCGGGTAGAAGGTTT-1 | GSM4626766 | Normal |
| GSM4626766_GTCGGGTAGACTGGGT-1 | GSM4626766 | Normal |
| GSM4626766_GTCGGGTAGCAATCTC-1 | GSM4626766 | Normal |
| GSM4626766_GTCGGGTAGGATCGCA-1 | GSM4626766 | Normal |
| GSM4626766_GTCGGGTAGGATGCGT-1 | GSM4626766 | Normal |
| GSM4626766_GTCGGGTCACAGGCCT-1 | GSM4626766 | Normal |
| GSM4626766_GTCGGGTCACAGGTTT-1 | GSM4626766 | Normal |
| GSM4626766_GTCGGGTCATACGCCG-1 | GSM4626766 | Normal |
| GSM4626766_GTCGGGTCATTCTGC-1  | GSM4626766 | Normal |
| GSM4626766_GTCGGGTGTAAGAGGA-1 | GSM4626766 | Normal |
| GSM4626766_GTCGGGTTCCGGGTGT-1 | GSM4626766 | Normal |
| GSM4626766_GTCGTAAAGAATTGTG-1 | GSM4626766 | Normal |
| GSM4626766_GTCGTAAAGACCGGAT-1 | GSM4626766 | Normal |
| GSM4626766_GTCGTAAAGCGTAGTG-1 | GSM4626766 | Normal |
| GSM4626766_GTCGTAAAGGAGTTGC-1 | GSM4626766 | Normal |
| GSM4626766_GTCGTAAAGTGTGAAT-1 | GSM4626766 | Normal |
| GSM4626766_GTCGTAAGTACGCTGC-1 | GSM4626766 | Normal |
| GSM4626766_GTCGTAAGTATTCTCT-1 | GSM4626766 | Normal |
| GSM4626766_GTCGTAAGTTATCGGT-1 | GSM4626766 | Normal |
| GSM4626766_GTCGTAATCAACACGT-1 | GSM4626766 | Normal |
| GSM4626766_GTCGTAATCAAGGTAA-1 | GSM4626766 | Normal |
| GSM4626766_GTCGTAATCAGCGATT-1 | GSM4626766 | Normal |
| GSM4626766_GTCGTAATCCTTTCGG-1 | GSM4626766 | Normal |
| GSM4626766_GTCTCGTAGAAGGGTA-1 | GSM4626766 | Normal |
| GSM4626766_GTCTCGTAGTGATCGG-1 | GSM4626766 | Normal |
| GSM4626766_GTCTCGTCACTCAGGC-1 | GSM4626766 | Normal |
| GSM4626766_GTCTCGTCAGGATTGG-1 | GSM4626766 | Normal |
| GSM4626766_GTCTCGTCAGTTTACG-1 | GSM4626766 | Normal |
| GSM4626766_GTCTCGTCATAACCTG-1 | GSM4626766 | Normal |
| GSM4626766_GTCTCGTCATATGGTC-1 | GSM4626766 | Normal |
| GSM4626766_GTCTCGTGTAATCGTC-1 | GSM4626766 | Normal |
| GSM4626766_GTCTCGTGTCACCTAA-1 | GSM4626766 | Normal |
| GSM4626766_GTCTCGTGAGTATA-1   | GSM4626766 | Normal |
| GSM4626766_GTCTCGTGTTATTCTC-1 | GSM4626766 | Normal |
| GSM4626766_GTCTCGTTCAACACCA-1 | GSM4626766 | Normal |
| GSM4626766_GTCTCGTTCCATTTA-1  | GSM4626766 | Normal |
| GSM4626766_GTCTCGTTCTAACTCT-1 | GSM4626766 | Normal |
| GSM4626766_GTCTCGTTCTGATACG-1 | GSM4626766 | Normal |
| GSM4626766_GTCTCGTTCTTAGCCC-1 | GSM4626766 | Normal |
| GSM4626766_GTCTTCGAGAGTTGGC-1 | GSM4626766 | Normal |
| GSM4626766_GTCTTCGAGATATACG-1 | GSM4626766 | Normal |
| GSM4626766_GTCTTCGAGATCACGG-1 | GSM4626766 | Normal |

|                                  |            |        |
|----------------------------------|------------|--------|
| GSM4626766_GTCTTCGAGCAGATCG-1    | GSM4626766 | Normal |
| GSM4626766_GTCTTCGAGCCCTAAT-1    | GSM4626766 | Normal |
| GSM4626766_GTCTTCGCACAAGCCC-1    | GSM4626766 | Normal |
| GSM4626766_GTCTTCGCACCAGTTA-1    | GSM4626766 | Normal |
| GSM4626766_GTCTTCGCATCCCATC-1    | GSM4626766 | Normal |
| GSM4626766_GTCTTCGCATCGTCGG-1    | GSM4626766 | Normal |
| GSM4626766_GTCTTCGGTACCGTAT-1    | GSM4626766 | Normal |
| GSM4626766_GTCTTCGGTCAGAAGC-1    | GSM4626766 | Normal |
| GSM4626766_GTCTTCGGTTGGGACA-1    | GSM4626766 | Normal |
| GSM4626766_GTCTTCGTCCCAAGAT-1    | GSM4626766 | Normal |
| GSM4626766_GTCTTCGTCCGCAGTG-1    | GSM4626766 | Normal |
| GSM4626766_GTCTTCGTCCGAGCAA-1    | GSM4626766 | Normal |
| GSM4626766_GTCTTCGTCCGGATGTT-1   | GSM4626766 | Normal |
| GSM4626766_GTCTTCGTCCGGTCTAA-1   | GSM4626766 | Normal |
| GSM4626766_GTCTTCGTCCGTCCAGG-1   | GSM4626766 | Normal |
| GSM4626766_GTGAAGGAGACTCGGA-1    | GSM4626766 | Normal |
| GSM4626766_GTGAAGGAGCCCAACC-1    | GSM4626766 | Normal |
| GSM4626766_GTGAAGGAGTGTTTGC-1    | GSM4626766 | Normal |
| GSM4626766_GTGAAGGCACGAGGTA-1    | GSM4626766 | Normal |
| GSM4626766_GTGAAGGCAGACGCCT-1    | GSM4626766 | Normal |
| GSM4626766_GTGAAGGCAGTATAAG-1    | GSM4626766 | Normal |
| GSM4626766_GTGAAGGGTAGGACAC-1    | GSM4626766 | Normal |
| GSM4626766_GTGAAGGGTCACCTAA-1    | GSM4626766 | Normal |
| GSM4626766_GTGAAGGGTCTCCACT-1    | GSM4626766 | Normal |
| GSM4626766_GTGAAGGGTGAAATCA-1    | GSM4626766 | Normal |
| GSM4626766_GTGAAGGGTGGTCTCG-1    | GSM4626766 | Normal |
| GSM4626766_GTGAAGGGTTAGAACA-1    | GSM4626766 | Normal |
| GSM4626766_GTGAAGGGTTCCTTG-1     | GSM4626766 | Normal |
| GSM4626766_GTGAAGGGTTTGGGCC-1    | GSM4626766 | Normal |
| GSM4626766_GTGCAGCAGCGAGAAA-1    | GSM4626766 | Normal |
| GSM4626766_GTGCAGCAGCGTCTAT-1    | GSM4626766 | Normal |
| GSM4626766_GTGCAGCAGCTAAACA-1    | GSM4626766 | Normal |
| GSM4626766_GTGCAGCAGGCTAGCA-1    | GSM4626766 | Normal |
| GSM4626766_GTGCAGCAGTGTCCCG-1    | GSM4626766 | Normal |
| GSM4626766_GTGCAGCCAGCGTTTCG-1   | GSM4626766 | Normal |
| GSM4626766_GTGCAGCCAGGATTGG-1    | GSM4626766 | Normal |
| GSM4626766_GTGCAGCCATAGGATA-1    | GSM4626766 | Normal |
| GSM4626766_GTGCAGCGTCCGAACC-1    | GSM4626766 | Normal |
| GSM4626766_GTGCAGCGTCGATTGT-1    | GSM4626766 | Normal |
| GSM4626766_GTGCAGCTCCGCATAA-1    | GSM4626766 | Normal |
| GSM4626766_GTGCAGCTCCTTGCCA-1    | GSM4626766 | Normal |
| GSM4626766_GTGCAGCTCTCGGACG-1    | GSM4626766 | Normal |
| GSM4626766_GTGCAGCTCTTCGGTC-1    | GSM4626766 | Normal |
| GSM4626766_GTGCATAAGAGTACAT-1    | GSM4626766 | Normal |
| GSM4626766_GTGCATAAGGCCCTTG-1    | GSM4626766 | Normal |
| GSM4626766_GTGCATAAGGCTCTTA-1    | GSM4626766 | Normal |
| GSM4626766_GTGCATAAGGGTTCGAT-1   | GSM4626766 | Normal |
| GSM4626766_GTGCATAAGTATCTCG-1    | GSM4626766 | Normal |
| GSM4626766_GTGCATACAAAGTACTGCT-1 | GSM4626766 | Normal |
| GSM4626766_GTGCATAAAGTACCT-1     | GSM4626766 | Normal |
| GSM4626766_GTGCATAACTTCTGC-1     | GSM4626766 | Normal |
| GSM4626766_GTGCATACAGGTCTCG-1    | GSM4626766 | Normal |
| GSM4626766_GTGCATAGTGTGCGTC-1    | GSM4626766 | Normal |
| GSM4626766_GTGCATAGTTAGAACA-1    | GSM4626766 | Normal |
| GSM4626766_GTGCATATCAAACAAG-1    | GSM4626766 | Normal |
| GSM4626766_GTGCATATCATTATCC-1    | GSM4626766 | Normal |
| GSM4626766_GTGCATATCGTAGGAG-1    | GSM4626766 | Normal |

|                                |            |        |
|--------------------------------|------------|--------|
| GSM4626766_GTGCATATCGTCGTTTC-1 | GSM4626766 | Normal |
| GSM4626766_GTGCGGTAGATTACCC-1  | GSM4626766 | Normal |
| GSM4626766_GTGCGGTAGCTGCGAA-1  | GSM4626766 | Normal |
| GSM4626766_GTGCGGTAGTGCCAGA-1  | GSM4626766 | Normal |
| GSM4626766_GTGCGGTCATCCGGGT-1  | GSM4626766 | Normal |
| GSM4626766_GTGCGGTGTACTCAAC-1  | GSM4626766 | Normal |
| GSM4626766_GTGCGGTGTATATCCG-1  | GSM4626766 | Normal |
| GSM4626766_GTGCGGTGTATTACCG-1  | GSM4626766 | Normal |
| GSM4626766_GTGCGGTGTTCCATGA-1  | GSM4626766 | Normal |
| GSM4626766_GTGCGGTGTTCCGCGAC-1 | GSM4626766 | Normal |
| GSM4626766_GTGCGGTTCCGAAACT-1  | GSM4626766 | Normal |
| GSM4626766_GTGCGGTTCTGCAAGT-1  | GSM4626766 | Normal |
| GSM4626766_GTGCTTCAGAGGGATA-1  | GSM4626766 | Normal |
| GSM4626766_GTGCTTCAGCAAATCA-1  | GSM4626766 | Normal |
| GSM4626766_GTGCTTCAGCCCAGCT-1  | GSM4626766 | Normal |
| GSM4626766_GTGCTTCAGTGGTAGC-1  | GSM4626766 | Normal |
| GSM4626766_GTGCTTCCAAGTTCTG-1  | GSM4626766 | Normal |
| GSM4626766_GTGCTTCCACGGTTTA-1  | GSM4626766 | Normal |
| GSM4626766_GTGCTTCGTGACGCCT-1  | GSM4626766 | Normal |
| GSM4626766_GTGCTTCGTGTCGCTG-1  | GSM4626766 | Normal |
| GSM4626766_GTGCTTCGTGTGACGA-1  | GSM4626766 | Normal |
| GSM4626766_GTGCTTCTCAGTACGT-1  | GSM4626766 | Normal |
| GSM4626766_GTGCTTCTCTTCGGTC-1  | GSM4626766 | Normal |
| GSM4626766_GTGGGTCCAGATAATG-1  | GSM4626766 | Normal |
| GSM4626766_GTGGGTCCATTAGCCA-1  | GSM4626766 | Normal |
| GSM4626766_GTGGGTTCGTACGCTGC-1 | GSM4626766 | Normal |
| GSM4626766_GTGGGTTCGTATAGGGC-1 | GSM4626766 | Normal |
| GSM4626766_GTGGGTTCGTCTACCTC-1 | GSM4626766 | Normal |
| GSM4626766_GTGGGTTCGTGAGTATA-1 | GSM4626766 | Normal |
| GSM4626766_GTGTGCGAGACGCAAC-1  | GSM4626766 | Normal |
| GSM4626766_GTGTGCGAGACGCACA-1  | GSM4626766 | Normal |
| GSM4626766_GTGTGCGAGATCTGAA-1  | GSM4626766 | Normal |
| GSM4626766_GTGTGCGAGATGCCAG-1  | GSM4626766 | Normal |
| GSM4626766_GTGTGCGAGTGTACGG-1  | GSM4626766 | Normal |
| GSM4626766_GTGTGCGAGTTAAGTG-1  | GSM4626766 | Normal |
| GSM4626766_GTGTGCGGTATCAGTC-1  | GSM4626766 | Normal |
| GSM4626766_GTGTGCGGTATGAATG-1  | GSM4626766 | Normal |
| GSM4626766_GTGTGCGGTGAGGGAG-1  | GSM4626766 | Normal |
| GSM4626766_GTGTGCGGTGATGTCT-1  | GSM4626766 | Normal |
| GSM4626766_GTGTGCGGTGCCTGTG-1  | GSM4626766 | Normal |
| GSM4626766_GTGTGCGGTGCGCTTG-1  | GSM4626766 | Normal |
| GSM4626766_GTGTGCGGTTAGAACA-1  | GSM4626766 | Normal |
| GSM4626766_GTGTGCGTCCCTTGCA-1  | GSM4626766 | Normal |
| GSM4626766_GTGTGCGTCGTACGGC-1  | GSM4626766 | Normal |
| GSM4626766_GTGTTAGAGACGACGT-1  | GSM4626766 | Normal |
| GSM4626766_GTGTTAGAGCCACGTC-1  | GSM4626766 | Normal |
| GSM4626766_GTGTTAGCAACTTGAC-1  | GSM4626766 | Normal |
| GSM4626766_GTGTTAGCACATGACT-1  | GSM4626766 | Normal |
| GSM4626766_GTGTTAGCATCACCT-1   | GSM4626766 | Normal |
| GSM4626766_GTGTTAGGTACCGTAT-1  | GSM4626766 | Normal |
| GSM4626766_GTGTTAGGTAGCTGCC-1  | GSM4626766 | Normal |
| GSM4626766_GTGTTAGGTCCATGAT-1  | GSM4626766 | Normal |
| GSM4626766_GTGTTAGGTTCCGGCA-1  | GSM4626766 | Normal |
| GSM4626766_GTGTTAGTCACTACGT-1  | GSM4626766 | Normal |
| GSM4626766_GTGTTAGTCATCATT-1   | GSM4626766 | Normal |
| GSM4626766_GTGTTAGTCTCGAGTA-1  | GSM4626766 | Normal |
| GSM4626766_GTGTTAGTCTGATACG-1  | GSM4626766 | Normal |



|                                |            |        |
|--------------------------------|------------|--------|
| GSM4626766_GTTAAGCAGCTATGCT-1  | GSM4626766 | Normal |
| GSM4626766_GTTAAGCAGTATCGAA-1  | GSM4626766 | Normal |
| GSM4626766_GTTAAGCAGTCCATAC-1  | GSM4626766 | Normal |
| GSM4626766_GTTAAGCCAATGCCAT-1  | GSM4626766 | Normal |
| GSM4626766_GTTAAGCCACAGACAG-1  | GSM4626766 | Normal |
| GSM4626766_GTTAAGCCATTGAGCT-1  | GSM4626766 | Normal |
| GSM4626766_GTTAAGCGTCTCCCTA-1  | GSM4626766 | Normal |
| GSM4626766_GTTAAGCGTTATGTGC-1  | GSM4626766 | Normal |
| GSM4626766_GTTAAGCGTTGAGTTC-1  | GSM4626766 | Normal |
| GSM4626766_GTTAAGCTCAACGGGA-1  | GSM4626766 | Normal |
| GSM4626766_GTTAAGCTCAGCTCGG-1  | GSM4626766 | Normal |
| GSM4626766_GTTAAGCTCGTAGGAG-1  | GSM4626766 | Normal |
| GSM4626766_GTTAAGCTCTACTCAT-1  | GSM4626766 | Normal |
| GSM4626766_GTTAAGCTCTTTCCTC-1  | GSM4626766 | Normal |
| GSM4626766_GTTACAGAGAATAGGG-1  | GSM4626766 | Normal |
| GSM4626766_GTTACAGAGCCCAGCT-1  | GSM4626766 | Normal |
| GSM4626766_GTTACAGAGGACGAAA-1  | GSM4626766 | Normal |
| GSM4626766_GTTACAGAGGTAAACT-1  | GSM4626766 | Normal |
| GSM4626766_GTTACAGCAGTTTACG-1  | GSM4626766 | Normal |
| GSM4626766_GTTACAGGTACCGTAT-1  | GSM4626766 | Normal |
| GSM4626766_GTTACAGGTTCCGTCT-1  | GSM4626766 | Normal |
| GSM4626766_GTTACAGGTTGCGTTA-1  | GSM4626766 | Normal |
| GSM4626766_GTTACAGGTTTAGCTG-1  | GSM4626766 | Normal |
| GSM4626766_GTTACAGTCCCACTTG-1  | GSM4626766 | Normal |
| GSM4626766_GTTCATTAGACAGACC-1  | GSM4626766 | Normal |
| GSM4626766_GTTCATTAGAGTACAT-1  | GSM4626766 | Normal |
| GSM4626766_GTTCATTAGATCGATA-1  | GSM4626766 | Normal |
| GSM4626766_GTTCATTAGTTGCAGG-1  | GSM4626766 | Normal |
| GSM4626766_GTTCATTCAAAGTCAA-1  | GSM4626766 | Normal |
| GSM4626766_GTTCATTCAACACGCC-1  | GSM4626766 | Normal |
| GSM4626766_GTTCATTCAAGTAGTA-1  | GSM4626766 | Normal |
| GSM4626766_GTTCATTCAAGTCGTC-1  | GSM4626766 | Normal |
| GSM4626766_GTTCATTATGTCCTC-1   | GSM4626766 | Normal |
| GSM4626766_GTTCATTATTTCAGG-1   | GSM4626766 | Normal |
| GSM4626766_GTTCATTGTATCAGTC-1  | GSM4626766 | Normal |
| GSM4626766_GTTCATTTCAACGAAA-1  | GSM4626766 | Normal |
| GSM4626766_GTTCATTTCTATGTT-1   | GSM4626766 | Normal |
| GSM4626766_GTTCATTTTCGACGAA-1  | GSM4626766 | Normal |
| GSM4626766_GTTCATTTCTGTGTCG-1  | GSM4626766 | Normal |
| GSM4626766_GTTCATTTCTCGTATT-1  | GSM4626766 | Normal |
| GSM4626766_GTTCGGGAGGACATTA-1  | GSM4626766 | Normal |
| GSM4626766_GTTCGGGCACACCGAC-1  | GSM4626766 | Normal |
| GSM4626766_GTTCGGGCACCCATTC-1  | GSM4626766 | Normal |
| GSM4626766_GTTCGGGCAGTAACGG-1  | GSM4626766 | Normal |
| GSM4626766_GTTCGGGCAGTCACTA-1  | GSM4626766 | Normal |
| GSM4626766_GTTCGGGCATGGGACA-1  | GSM4626766 | Normal |
| GSM4626766_GTTCGGGGTAAGTTCC-1  | GSM4626766 | Normal |
| GSM4626766_GTTCGGGGTGGCTCCA-1  | GSM4626766 | Normal |
| GSM4626766_GTTCGGGGTTCAGGCC-1  | GSM4626766 | Normal |
| GSM4626766_GTTCGGGGTTCGGCAC-1  | GSM4626766 | Normal |
| GSM4626766_GTTCGGGTCACGACTA-1  | GSM4626766 | Normal |
| GSM4626766_GTTCGGGTCAGCCTAA-1  | GSM4626766 | Normal |
| GSM4626766_GTTCGGGTCAGTCAGT-1  | GSM4626766 | Normal |
| GSM4626766_GTTCGGGTCCAGTATG-1  | GSM4626766 | Normal |
| GSM4626766_GTTCGGGTCCGCATAA-1  | GSM4626766 | Normal |
| GSM4626766_GTTCGGGTCCCTACAGA-1 | GSM4626766 | Normal |
| GSM4626766_GTTCGGGTCCGCATGGC-1 | GSM4626766 | Normal |

|                                |            |        |
|--------------------------------|------------|--------|
| GSM4626766_GTTCTCGGTCGGACAAG-1 | GSM4626766 | Normal |
| GSM4626766_GTTCTCGAGCAATATG-1  | GSM4626766 | Normal |
| GSM4626766_GTTCTCGCAGCTTCGG-1  | GSM4626766 | Normal |
| GSM4626766_GTTCTCGCAGGTTTCA-1  | GSM4626766 | Normal |
| GSM4626766_GTTCTCGGTGTGGCTC-1  | GSM4626766 | Normal |
| GSM4626766_GTTCTCGTCCCTAATT-1  | GSM4626766 | Normal |
| GSM4626766_GTTCTCGTCTGATTCT-1  | GSM4626766 | Normal |
| GSM4626766_GTTCTCGTCTGTCCGT-1  | GSM4626766 | Normal |
| GSM4626766_GTTCTCGTCTTGTATC-1  | GSM4626766 | Normal |
| GSM4626766_GTTTCTAAGAAACCAT-1  | GSM4626766 | Normal |
| GSM4626766_GTTTCTAAGGACATTA-1  | GSM4626766 | Normal |
| GSM4626766_GTTTCTAAGGCAGTCA-1  | GSM4626766 | Normal |
| GSM4626766_GTTTCTAAGTCAAGGC-1  | GSM4626766 | Normal |
| GSM4626766_GTTTCTACAACACCCG-1  | GSM4626766 | Normal |
| GSM4626766_GTTTCTACAGACGTAG-1  | GSM4626766 | Normal |
| GSM4626766_GTTTCTACAGTCACTA-1  | GSM4626766 | Normal |
| GSM4626766_GTTTCTAGTAGGCATG-1  | GSM4626766 | Normal |
| GSM4626766_GTTTCTAGTAGGGACT-1  | GSM4626766 | Normal |
| GSM4626766_GTTTCTAGTGGTACAG-1  | GSM4626766 | Normal |
| GSM4626766_GTTTCTAGTTCCTTG-1   | GSM4626766 | Normal |
| GSM4626766_GTTTCTATCCCTTGTG-1  | GSM4626766 | Normal |
| GSM4626766_GTTTCTATCCGCATAA-1  | GSM4626766 | Normal |
| GSM4626766_GTTTCTATCCGTAGGC-1  | GSM4626766 | Normal |
| GSM4626766_GTTTCTATCGAGCCCA-1  | GSM4626766 | Normal |
| GSM4626766_GTTTCTATCGGGAGTA-1  | GSM4626766 | Normal |
| GSM4626766_GTTTCTATCTTCGGTC-1  | GSM4626766 | Normal |
| GSM4626766_GTTTCTATCTTGGGTA-1  | GSM4626766 | Normal |
| GSM4626766_GTTTCTATCTTGTACT-1  | GSM4626766 | Normal |
| GSM4626766_TAAACCGAGATATACG-1  | GSM4626766 | Normal |
| GSM4626766_TAAACCGAGATCCGAG-1  | GSM4626766 | Normal |
| GSM4626766_TAAACCGAGCTGGAAC-1  | GSM4626766 | Normal |
| GSM4626766_TAAACCGCACCGAAAG-1  | GSM4626766 | Normal |
| GSM4626766_TAAACCGCACTTAAGC-1  | GSM4626766 | Normal |
| GSM4626766_TAAACCGCAGACGCCT-1  | GSM4626766 | Normal |
| GSM4626766_TAAACCGCATGATCCA-1  | GSM4626766 | Normal |
| GSM4626766_TAAACCGGTAAGGGCT-1  | GSM4626766 | Normal |
| GSM4626766_TAAACCGGTCCTGGC-1   | GSM4626766 | Normal |
| GSM4626766_TAAACCGGTCAGGACA-1  | GSM4626766 | Normal |
| GSM4626766_TAAACCGGTTATGTGC-1  | GSM4626766 | Normal |
| GSM4626766_TAAGAGAAGGACAGAA-1  | GSM4626766 | Normal |
| GSM4626766_TAAGAGAAGGGCTTGA-1  | GSM4626766 | Normal |
| GSM4626766_TAAGAGAAGGGTTCGAT-1 | GSM4626766 | Normal |
| GSM4626766_TAAGAGAAGTCAAGCC-1  | GSM4626766 | Normal |
| GSM4626766_TAAGAGACACTTCGAA-1  | GSM4626766 | Normal |
| GSM4626766_TAAGAGACAGCCAGAA-1  | GSM4626766 | Normal |
| GSM4626766_TAAGAGACATACGCCG-1  | GSM4626766 | Normal |
| GSM4626766_TAAGAGACATCATCCC-1  | GSM4626766 | Normal |
| GSM4626766_TAAGAGACATGGATGG-1  | GSM4626766 | Normal |
| GSM4626766_TAAGAGACATGGTCAT-1  | GSM4626766 | Normal |
| GSM4626766_TAAGAGAGTAGCCTAT-1  | GSM4626766 | Normal |
| GSM4626766_TAAGAGAGTAGCTTGT-1  | GSM4626766 | Normal |
| GSM4626766_TAAGAGAGTACCTAA-1   | GSM4626766 | Normal |
| GSM4626766_TAAGAGAGTGTTCGAT-1  | GSM4626766 | Normal |
| GSM4626766_TAAGAGAGTTACGACT-1  | GSM4626766 | Normal |
| GSM4626766_TAAGAGAGTTCGAATC-1  | GSM4626766 | Normal |
| GSM4626766_TAAGAGATCACCTCA-1   | GSM4626766 | Normal |
| GSM4626766_TAAGAGATCAGAGACG-1  | GSM4626766 | Normal |

|                                |            |        |
|--------------------------------|------------|--------|
| GSM4626766_TAAGAGATCCACG TTC-1 | GSM4626766 | Normal |
| GSM4626766_TAAGAGATCCACTGGG-1  | GSM4626766 | Normal |
| GSM4626766_TAAGAGATCGGTAAAC-1  | GSM4626766 | Normal |
| GSM4626766_TAAGAGATCTTTAGGG-1  | GSM4626766 | Normal |
| GSM4626766_TAAGCGTAGCGATCCC-1  | GSM4626766 | Normal |
| GSM4626766_TAAGCGTAGCTTATCG-1  | GSM4626766 | Normal |
| GSM4626766_TAAGCGTAGGGCTTCC-1  | GSM4626766 | Normal |
| GSM4626766_TAAGCGTAGTGTCTCA-1  | GSM4626766 | Normal |
| GSM4626766_TAAGCGTCAAAGGTGC-1  | GSM4626766 | Normal |
| GSM4626766_TAAGCGTCAAAGTGCG-1  | GSM4626766 | Normal |
| GSM4626766_TAAGCGTCAAGCGAGT-1  | GSM4626766 | Normal |
| GSM4626766_TAAGCGTCACCTTGTC-1  | GSM4626766 | Normal |
| GSM4626766_TAAGCGTCACGAAATA-1  | GSM4626766 | Normal |
| GSM4626766_TAAGCGTGTTGTGGCC-1  | GSM4626766 | Normal |
| GSM4626766_TAAGCGTTCAACTG-1    | GSM4626766 | Normal |
| GSM4626766_TAAGCGTTCAGTGTTG-1  | GSM4626766 | Normal |
| GSM4626766_TAAGCGTTCCAAACAC-1  | GSM4626766 | Normal |
| GSM4626766_TAAGCGTTCGGTAGGC-1  | GSM4626766 | Normal |
| GSM4626766_TAAGCGTTCGCGTTTC-1  | GSM4626766 | Normal |
| GSM4626766_TAAGCGTTCGGAGCAA-1  | GSM4626766 | Normal |
| GSM4626766_TAAGTGCAGATGGGTC-1  | GSM4626766 | Normal |
| GSM4626766_TAAGTGCATCGCATAT-1  | GSM4626766 | Normal |
| GSM4626766_TAAGTGCATTATGCGT-1  | GSM4626766 | Normal |
| GSM4626766_TAAGTGCATTCAACCA-1  | GSM4626766 | Normal |
| GSM4626766_TAAGTGCCTCAACCAAC-1 | GSM4626766 | Normal |
| GSM4626766_TAAGTGCCTCGAGAGCA-1 | GSM4626766 | Normal |
| GSM4626766_TAAGTGCCTCGGGAGTA-1 | GSM4626766 | Normal |
| GSM4626766_TAAGTGCCTCTAACTTC-1 | GSM4626766 | Normal |
| GSM4626766_TACACGAAGAAGCCCA-1  | GSM4626766 | Normal |
| GSM4626766_TACACGAAGGAGTTGC-1  | GSM4626766 | Normal |
| GSM4626766_TACACGAAGGGAGTAA-1  | GSM4626766 | Normal |
| GSM4626766_TACACGACACTGCCAG-1  | GSM4626766 | Normal |
| GSM4626766_TACACGAGTAAGGGAA-1  | GSM4626766 | Normal |
| GSM4626766_TACACGAGTTCGTCTC-1  | GSM4626766 | Normal |
| GSM4626766_TACACGATCCAAATGC-1  | GSM4626766 | Normal |
| GSM4626766_TACACGATCGAGCCCA-1  | GSM4626766 | Normal |
| GSM4626766_TACACGATCGCTTAGA-1  | GSM4626766 | Normal |
| GSM4626766_TACAGTGAGCTAAACA-1  | GSM4626766 | Normal |
| GSM4626766_TACAGTGAGGCAGTCA-1  | GSM4626766 | Normal |
| GSM4626766_TACAGTGAGGGAGTAA-1  | GSM4626766 | Normal |
| GSM4626766_TACAGTGAGTGTACGG-1  | GSM4626766 | Normal |
| GSM4626766_TACAGTGACACAACGTT-1 | GSM4626766 | Normal |
| GSM4626766_TACAGTGACCCGAAA-1   | GSM4626766 | Normal |
| GSM4626766_TACAGTGACGCCCTTGG-1 | GSM4626766 | Normal |
| GSM4626766_TACAGTGACATTAGCCA-1 | GSM4626766 | Normal |
| GSM4626766_TACAGTGACATTATCTC-1 | GSM4626766 | Normal |
| GSM4626766_TACAGTGGTGCAGTAG-1  | GSM4626766 | Normal |
| GSM4626766_TACAGTGGTGTTTGGT-1  | GSM4626766 | Normal |
| GSM4626766_TACAGTGTCAACGGGA-1  | GSM4626766 | Normal |
| GSM4626766_TACAGTGTCAAGATCT-1  | GSM4626766 | Normal |
| GSM4626766_TACAGTGTCCAAAGTC-1  | GSM4626766 | Normal |
| GSM4626766_TACAGTGTCCATGAGT-1  | GSM4626766 | Normal |
| GSM4626766_TACAGTGTCTGTCTGCT-1 | GSM4626766 | Normal |
| GSM4626766_TACAGTGTCTTGTATC-1  | GSM4626766 | Normal |
| GSM4626766_TACCTATAGCATGGCA-1  | GSM4626766 | Normal |
| GSM4626766_TACCTATAGCCACCTG-1  | GSM4626766 | Normal |
| GSM4626766_TACCTATAGTGTCCAT-1  | GSM4626766 | Normal |

|                                |            |        |
|--------------------------------|------------|--------|
| GSM4626766_TACCTATCAGCGATCC-1  | GSM4626766 | Normal |
| GSM4626766_TACCTATCAGGACCCT-1  | GSM4626766 | Normal |
| GSM4626766_TACCTATGTCAACTGT-1  | GSM4626766 | Normal |
| GSM4626766_TACCTATGTGTAATGA-1  | GSM4626766 | Normal |
| GSM4626766_TACCTATGTGTATGGG-1  | GSM4626766 | Normal |
| GSM4626766_TACCTATTCCCAGGTG-1  | GSM4626766 | Normal |
| GSM4626766_TACCTATTCTCATTCA-1  | GSM4626766 | Normal |
| GSM4626766_TACCTTAAGCGATGAC-1  | GSM4626766 | Normal |
| GSM4626766_TACCTTAAGTTAACGA-1  | GSM4626766 | Normal |
| GSM4626766_TACCTTACAAAGGTGC-1  | GSM4626766 | Normal |
| GSM4626766_TACCTTACAAGGTTCT-1  | GSM4626766 | Normal |
| GSM4626766_TACCTTACACAACGCC-1  | GSM4626766 | Normal |
| GSM4626766_TACCTTACACTGTCGG-1  | GSM4626766 | Normal |
| GSM4626766_TACCTTACATTCCCTCG-1 | GSM4626766 | Normal |
| GSM4626766_TACCTTAGTCTCCACT-1  | GSM4626766 | Normal |
| GSM4626766_TACCTTATCACATAGC-1  | GSM4626766 | Normal |
| GSM4626766_TACCTTATCGAACTGT-1  | GSM4626766 | Normal |
| GSM4626766_TACCTTATCGGTCTAA-1  | GSM4626766 | Normal |
| GSM4626766_TACGGATAGAATTCCC-1  | GSM4626766 | Normal |
| GSM4626766_TACGGATAGCTGTCTA-1  | GSM4626766 | Normal |
| GSM4626766_TACGGATCAGGTCTCG-1  | GSM4626766 | Normal |
| GSM4626766_TACGGATCATCCGTGG-1  | GSM4626766 | Normal |
| GSM4626766_TACGGATGTAGCTAAA-1  | GSM4626766 | Normal |
| GSM4626766_TACGGATGTCCGTGAC-1  | GSM4626766 | Normal |
| GSM4626766_TACGGATGTCTCCCTA-1  | GSM4626766 | Normal |
| GSM4626766_TACGGATGTTGTGGAG-1  | GSM4626766 | Normal |
| GSM4626766_TACGGATTTCATCGCTC-1 | GSM4626766 | Normal |
| GSM4626766_TACGGATTCCGCTGTT-1  | GSM4626766 | Normal |
| GSM4626766_TACGGATTTCGTTTGCC-1 | GSM4626766 | Normal |
| GSM4626766_TACGGGCAGCACCGCT-1  | GSM4626766 | Normal |
| GSM4626766_TACGGGCAGCGAGAAA-1  | GSM4626766 | Normal |
| GSM4626766_TACGGGCAGCGTCAAG-1  | GSM4626766 | Normal |
| GSM4626766_TACGGGCAGGACATTA-1  | GSM4626766 | Normal |
| GSM4626766_TACGGGCAGGGTCTCC-1  | GSM4626766 | Normal |
| GSM4626766_TACGGGCAGGTGGGTT-1  | GSM4626766 | Normal |
| GSM4626766_TACGGGCAGTAGATGT-1  | GSM4626766 | Normal |
| GSM4626766_TACGGGCAGTGGAAT-1   | GSM4626766 | Normal |
| GSM4626766_TACGGGCCAAGCCGTC-1  | GSM4626766 | Normal |
| GSM4626766_TACGGGCCACTAAGTC-1  | GSM4626766 | Normal |
| GSM4626766_TACGGGCCGTAGCGTCC-1 | GSM4626766 | Normal |
| GSM4626766_TACGGGCCGTCTAGCCG-1 | GSM4626766 | Normal |
| GSM4626766_TACGGGCCGTGACGCCT-1 | GSM4626766 | Normal |
| GSM4626766_TACGGGCCGTGTCTGAT-1 | GSM4626766 | Normal |
| GSM4626766_TACGGGCCGTTTCAATC-1 | GSM4626766 | Normal |
| GSM4626766_TACGGGCCGTTGAACTC-1 | GSM4626766 | Normal |
| GSM4626766_TACGGGCTCACATACG-1  | GSM4626766 | Normal |
| GSM4626766_TACGGGCTCAGTTCA-1   | GSM4626766 | Normal |
| GSM4626766_TACGGGCTCAGTTTCA-1  | GSM4626766 | Normal |
| GSM4626766_TACGGTAAGAAGGGTA-1  | GSM4626766 | Normal |
| GSM4626766_TACGGTAAGGACAGCT-1  | GSM4626766 | Normal |
| GSM4626766_TACGGTACATCACGAT-1  | GSM4626766 | Normal |
| GSM4626766_TACGGTAGTCTTCGTC-1  | GSM4626766 | Normal |
| GSM4626766_TACGGTAGTGTGACCC-1  | GSM4626766 | Normal |
| GSM4626766_TACGGTATCAACGCTA-1  | GSM4626766 | Normal |
| GSM4626766_TACGGTATCAGTTTCA-1  | GSM4626766 | Normal |
| GSM4626766_TACGGTATCCTTCAAT-1  | GSM4626766 | Normal |
| GSM4626766_TACGGTATCTCTGCTG-1  | GSM4626766 | Normal |

|                                |            |        |
|--------------------------------|------------|--------|
| GSM4626766_TACTCATAGAGGTTGC-1  | GSM4626766 | Normal |
| GSM4626766_TACTCATAGTCATCCA-1  | GSM4626766 | Normal |
| GSM4626766_TACTCATAGTCCAGGA-1  | GSM4626766 | Normal |
| GSM4626766_TACTCATAGTGAACAT-1  | GSM4626766 | Normal |
| GSM4626766_TACTCATCAAGTCATC-1  | GSM4626766 | Normal |
| GSM4626766_TACTCATCACACCGAC-1  | GSM4626766 | Normal |
| GSM4626766_TACTCATCAGCCAATT-1  | GSM4626766 | Normal |
| GSM4626766_TACTCATCATCACGAT-1  | GSM4626766 | Normal |
| GSM4626766_TACTCATCATGTCTCC-1  | GSM4626766 | Normal |
| GSM4626766_TACTCATGTCAATACC-1  | GSM4626766 | Normal |
| GSM4626766_TACTCATGTCTCTCTG-1  | GSM4626766 | Normal |
| GSM4626766_TACTCATTCCGTTGTC-1  | GSM4626766 | Normal |
| GSM4626766_TACTCATTCCCTGTACC-1 | GSM4626766 | Normal |
| GSM4626766_TACTCATTTCGTGTAGT-1 | GSM4626766 | Normal |
| GSM4626766_TACTCATTCTGCAAGT-1  | GSM4626766 | Normal |
| GSM4626766_TACTCGCAGCAATATG-1  | GSM4626766 | Normal |
| GSM4626766_TACTCGCAGCTTCGCG-1  | GSM4626766 | Normal |
| GSM4626766_TACTCGCAGGGATGGG-1  | GSM4626766 | Normal |
| GSM4626766_TACTCGCAGTCCAGGA-1  | GSM4626766 | Normal |
| GSM4626766_TACTCGCGTAAGAGGA-1  | GSM4626766 | Normal |
| GSM4626766_TACTCGCGTCTAAAGA-1  | GSM4626766 | Normal |
| GSM4626766_TACTCGCTCAGTTTGG-1  | GSM4626766 | Normal |
| GSM4626766_TACTCGCTCATTATCC-1  | GSM4626766 | Normal |
| GSM4626766_TACTCGCTCCACGACG-1  | GSM4626766 | Normal |
| GSM4626766_TACTCGCTCCGTCATC-1  | GSM4626766 | Normal |
| GSM4626766_TACTTACAGGCCCGTT-1  | GSM4626766 | Normal |
| GSM4626766_TACTTACAGGTCGGAT-1  | GSM4626766 | Normal |
| GSM4626766_TACTTACAGTTATCGC-1  | GSM4626766 | Normal |
| GSM4626766_TACTTACCAAGTAATG-1  | GSM4626766 | Normal |
| GSM4626766_TACTTACCACCATCCT-1  | GSM4626766 | Normal |
| GSM4626766_TACTTACCACCTCGACG-1 | GSM4626766 | Normal |
| GSM4626766_TACTTACCAGCGTTCCG-1 | GSM4626766 | Normal |
| GSM4626766_TACTTACGTATTAGCC-1  | GSM4626766 | Normal |
| GSM4626766_TACTTACGTATTCGTG-1  | GSM4626766 | Normal |
| GSM4626766_TACTTACGTCACTTCC-1  | GSM4626766 | Normal |
| GSM4626766_TACTTACGTCTAGCG-1   | GSM4626766 | Normal |
| GSM4626766_TACTTACTCAAACGGG-1  | GSM4626766 | Normal |
| GSM4626766_TACTTACTCATGCATG-1  | GSM4626766 | Normal |
| GSM4626766_TACTTACTCTTATCTG-1  | GSM4626766 | Normal |
| GSM4626766_TACTTACTCTTGAGGT-1  | GSM4626766 | Normal |
| GSM4626766_TACTTGTAGGACAGAA-1  | GSM4626766 | Normal |
| GSM4626766_TACTTGTAGGAGTTTA-1  | GSM4626766 | Normal |
| GSM4626766_TACTTGTAGTGTCTCA-1  | GSM4626766 | Normal |
| GSM4626766_TACTTGTCAAGGTGTG-1  | GSM4626766 | Normal |
| GSM4626766_TACTTGTCAATAGCGG-1  | GSM4626766 | Normal |
| GSM4626766_TACTTGTGTTAGTGGG-1  | GSM4626766 | Normal |
| GSM4626766_TACTTGTTCATTCACT-1  | GSM4626766 | Normal |
| GSM4626766_TACTTGTTCAGAAAGG-1  | GSM4626766 | Normal |
| GSM4626766_TAGACCAAGCAGCGTA-1  | GSM4626766 | Normal |
| GSM4626766_TAGACCAAGCTAACAA-1  | GSM4626766 | Normal |
| GSM4626766_TAGACCAAGCTAGGCA-1  | GSM4626766 | Normal |
| GSM4626766_TAGACCAAGTGGGTTG-1  | GSM4626766 | Normal |
| GSM4626766_TAGACCACAACCTGCGC-1 | GSM4626766 | Normal |
| GSM4626766_TAGACCACACCAGCAC-1  | GSM4626766 | Normal |
| GSM4626766_TAGACCACAGCTCGCA-1  | GSM4626766 | Normal |
| GSM4626766_TAGACCACATTGAGCT-1  | GSM4626766 | Normal |
| GSM4626766_TAGACCAGTACATCCA-1  | GSM4626766 | Normal |

|                                |            |        |
|--------------------------------|------------|--------|
| GSM4626766_TAGACCAGTGCACGAA-1  | GSM4626766 | Normal |
| GSM4626766_TAGACCAGTGTAAGTA-1  | GSM4626766 | Normal |
| GSM4626766_TAGACCAGTGTGCCTG-1  | GSM4626766 | Normal |
| GSM4626766_TAGACCATCCTAGAAC-1  | GSM4626766 | Normal |
| GSM4626766_TAGACCATCGGTCCGA-1  | GSM4626766 | Normal |
| GSM4626766_TAGACCATCTGCTGCT-1  | GSM4626766 | Normal |
| GSM4626766_TAGAGCTCAAGAGGCT-1  | GSM4626766 | Normal |
| GSM4626766_TAGAGCTCAGATGGGT-1  | GSM4626766 | Normal |
| GSM4626766_TAGAGCTCAGTAGAGC-1  | GSM4626766 | Normal |
| GSM4626766_TAGAGCTCATAACCTG-1  | GSM4626766 | Normal |
| GSM4626766_TAGAGCTGTCAATGTC-1  | GSM4626766 | Normal |
| GSM4626766_TAGAGCTGTCTTTCAT-1  | GSM4626766 | Normal |
| GSM4626766_TAGAGCTGTTCCCGAG-1  | GSM4626766 | Normal |
| GSM4626766_TAGAGCTTCAGGCGAA-1  | GSM4626766 | Normal |
| GSM4626766_TAGAGCTTCTTGCCGT-1  | GSM4626766 | Normal |
| GSM4626766_TAGCCGGAGATGTAAC-1  | GSM4626766 | Normal |
| GSM4626766_TAGCCGGAGCCATCGC-1  | GSM4626766 | Normal |
| GSM4626766_TAGCCGGGTCATCCCT-1  | GSM4626766 | Normal |
| GSM4626766_TAGCCGGGTTAGTGGG-1  | GSM4626766 | Normal |
| GSM4626766_TAGGCATAGAAACGAG-1  | GSM4626766 | Normal |
| GSM4626766_TAGGCATAGCAGCGTA-1  | GSM4626766 | Normal |
| GSM4626766_TAGGCATAGTAACCCT-1  | GSM4626766 | Normal |
| GSM4626766_TAGGCATCAGTAAGAT-1  | GSM4626766 | Normal |
| GSM4626766_TAGGCATGTAAATGTG-1  | GSM4626766 | Normal |
| GSM4626766_TAGGCATGTAAACGTTT-1 | GSM4626766 | Normal |
| GSM4626766_TAGGCATGTCCCTTGT-1  | GSM4626766 | Normal |
| GSM4626766_TAGGCATGTCTGGTTCG-1 | GSM4626766 | Normal |
| GSM4626766_TAGGCATGTACTGAC-1   | GSM4626766 | Normal |
| GSM4626766_TAGGCATTCAACGCTA-1  | GSM4626766 | Normal |
| GSM4626766_TAGGCATTAGCTCTC-1   | GSM4626766 | Normal |
| GSM4626766_TAGGCATTATCGATG-1   | GSM4626766 | Normal |
| GSM4626766_TAGGCATTCTGTACC-1   | GSM4626766 | Normal |
| GSM4626766_TAGGCATTCTATCCCG-1  | GSM4626766 | Normal |
| GSM4626766_TAGTGGTAGAGACTTA-1  | GSM4626766 | Normal |
| GSM4626766_TAGTGGTAGAGCTATA-1  | GSM4626766 | Normal |
| GSM4626766_TAGTGGTAGGCCCTCA-1  | GSM4626766 | Normal |
| GSM4626766_TAGTGGTACCAGGTC-1   | GSM4626766 | Normal |
| GSM4626766_TAGTGGTCAGCAGTTT-1  | GSM4626766 | Normal |
| GSM4626766_TAGTGGTCATCGATGT-1  | GSM4626766 | Normal |
| GSM4626766_TAGTGGTTCAGCAACT-1  | GSM4626766 | Normal |
| GSM4626766_TAGTGGTTCAGTATG-1   | GSM4626766 | Normal |
| GSM4626766_TAGTGGTTCGGCGGTT-1  | GSM4626766 | Normal |
| GSM4626766_TAGTGGTCTCCAGGG-1   | GSM4626766 | Normal |
| GSM4626766_TAGTTGGAGCCCAGCT-1  | GSM4626766 | Normal |
| GSM4626766_TAGTTGGAGCTCAACT-1  | GSM4626766 | Normal |
| GSM4626766_TAGTTGGAGGACACCA-1  | GSM4626766 | Normal |
| GSM4626766_TAGTTGGAGTCATGCT-1  | GSM4626766 | Normal |
| GSM4626766_TAGTTGGAGTCCATAC-1  | GSM4626766 | Normal |
| GSM4626766_TAGTTGGCAATACGCT-1  | GSM4626766 | Normal |
| GSM4626766_TAGTTGGCACATGACT-1  | GSM4626766 | Normal |
| GSM4626766_TAGTTGGCACTGTCGG-1  | GSM4626766 | Normal |
| GSM4626766_TAGTTGGGTGAAAGAG-1  | GSM4626766 | Normal |
| GSM4626766_TAGTTGGTCAAACAAG-1  | GSM4626766 | Normal |
| GSM4626766_TAGTTGGTCACTGGGC-1  | GSM4626766 | Normal |
| GSM4626766_TAGTTGGTCTCTAAGG-1  | GSM4626766 | Normal |
| GSM4626766_TAGTTGGTCTTACCGC-1  | GSM4626766 | Normal |
| GSM4626766_TATCAGGAGACAAAGG-1  | GSM4626766 | Normal |

|                                 |            |        |
|---------------------------------|------------|--------|
| GSM4626766_TATCAGGAGAGGTTAT-1   | GSM4626766 | Normal |
| GSM4626766_TATCAGGAGATACACA-1   | GSM4626766 | Normal |
| GSM4626766_TATCAGGAGCTCTCGG-1   | GSM4626766 | Normal |
| GSM4626766_TATCAGGAGGTAAACT-1   | GSM4626766 | Normal |
| GSM4626766_TATCAGGAGTTGCAGG-1   | GSM4626766 | Normal |
| GSM4626766_TATCAGGCAAGGTGTG-1   | GSM4626766 | Normal |
| GSM4626766_TATCAGGCAGACACTT-1   | GSM4626766 | Normal |
| GSM4626766_TATCAGGCATCGACGC-1   | GSM4626766 | Normal |
| GSM4626766_TATCAGGCATCGGAAG-1   | GSM4626766 | Normal |
| GSM4626766_TATCAGGCATTACCTT-1   | GSM4626766 | Normal |
| GSM4626766_TATCAGGGTCTAGCCG-1   | GSM4626766 | Normal |
| GSM4626766_TATCAGGGTCTTCTCG-1   | GSM4626766 | Normal |
| GSM4626766_TATCAGGGTCTTGCGG-1   | GSM4626766 | Normal |
| GSM4626766_TATCAGGTCAGTTCGA-1   | GSM4626766 | Normal |
| GSM4626766_TATCAGGTCCAAACAC-1   | GSM4626766 | Normal |
| GSM4626766_TATCAGGTCCTTGACC-1   | GSM4626766 | Normal |
| GSM4626766_TATCAGGTCGTTTGCC-1   | GSM4626766 | Normal |
| GSM4626766_TATCAGGTCTAGAGTC-1   | GSM4626766 | Normal |
| GSM4626766_TATCAGGTCTGATTCT-1   | GSM4626766 | Normal |
| GSM4626766_TATCTCAAGACAATAC-1   | GSM4626766 | Normal |
| GSM4626766_TATCTCAAGTGTTAGA-1   | GSM4626766 | Normal |
| GSM4626766_TATCTCACACCAGATT-1   | GSM4626766 | Normal |
| GSM4626766_TATCTCACAGCTGCTG-1   | GSM4626766 | Normal |
| GSM4626766_TATCTCACATCTCGCT-1   | GSM4626766 | Normal |
| GSM4626766_TATCTCAGTCATTAGC-1   | GSM4626766 | Normal |
| GSM4626766_TATCTCAGTCGTCTTC-1   | GSM4626766 | Normal |
| GSM4626766_TATCTCAGTGACTIONAT-1 | GSM4626766 | Normal |
| GSM4626766_TATCTCAGTGTTGGGA-1   | GSM4626766 | Normal |
| GSM4626766_TATCTCATCAACGGGA-1   | GSM4626766 | Normal |
| GSM4626766_TATCTCATCACCTTAT-1   | GSM4626766 | Normal |
| GSM4626766_TATCTCATCCACGTTT-1   | GSM4626766 | Normal |
| GSM4626766_TATCTCATCTGCGACG-1   | GSM4626766 | Normal |
| GSM4626766_TATCTCATCTTTACAC-1   | GSM4626766 | Normal |
| GSM4626766_TATGCCAGCCACCTG-1    | GSM4626766 | Normal |
| GSM4626766_TATGCCAGCGTTGCC-1    | GSM4626766 | Normal |
| GSM4626766_TATGCCAGTAGTGCG-1    | GSM4626766 | Normal |
| GSM4626766_TATGCCCAATAGCAA-1    | GSM4626766 | Normal |
| GSM4626766_TATGCCCAACCAGTG-1    | GSM4626766 | Normal |
| GSM4626766_TATGCCCAAGACACTT-1   | GSM4626766 | Normal |
| GSM4626766_TATGCCCATCTATGG-1    | GSM4626766 | Normal |
| GSM4626766_TATGCCCGTAATTGGA-1   | GSM4626766 | Normal |
| GSM4626766_TATGCCCGTGTGCCTG-1   | GSM4626766 | Normal |
| GSM4626766_TATGCCCGTGTGAGG-1    | GSM4626766 | Normal |
| GSM4626766_TATGCCCGTTACTCT-1    | GSM4626766 | Normal |
| GSM4626766_TATGCCCTCAGATAAG-1   | GSM4626766 | Normal |
| GSM4626766_TATGCCCTCATGTGGT-1   | GSM4626766 | Normal |
| GSM4626766_TATGCCCTCCAACTG-1    | GSM4626766 | Normal |
| GSM4626766_TATTACCAGAATTGTG-1   | GSM4626766 | Normal |
| GSM4626766_TATTACCAGATGTGTA-1   | GSM4626766 | Normal |
| GSM4626766_TATTACCAGCGATGAC-1   | GSM4626766 | Normal |
| GSM4626766_TATTACCAGGTTCTTA-1   | GSM4626766 | Normal |
| GSM4626766_TATTACCAGTGCGTGA-1   | GSM4626766 | Normal |
| GSM4626766_TATTACCCAACAACCT-1   | GSM4626766 | Normal |
| GSM4626766_TATTACCCAAGCGAGT-1   | GSM4626766 | Normal |
| GSM4626766_TATTACCCACATTAGC-1   | GSM4626766 | Normal |
| GSM4626766_TATTACCCACGCGAAA-1   | GSM4626766 | Normal |

|                                |            |        |
|--------------------------------|------------|--------|
| GSM4626766_TATTACCCACTTGGAT-1  | GSM4626766 | Normal |
| GSM4626766_TATTACCCAGTTTACG-1  | GSM4626766 | Normal |
| GSM4626766_TATTACCCATCGGAAG-1  | GSM4626766 | Normal |
| GSM4626766_TATTACCGTAGCTGCC-1  | GSM4626766 | Normal |
| GSM4626766_TATTACCGTCATCCCT-1  | GSM4626766 | Normal |
| GSM4626766_TATTACCGTCGCGTGT-1  | GSM4626766 | Normal |
| GSM4626766_TATTACCGTGTGCGTC-1  | GSM4626766 | Normal |
| GSM4626766_TATTACCGTTCATGGT-1  | GSM4626766 | Normal |
| GSM4626766_TATTACCGTTCGGCAC-1  | GSM4626766 | Normal |
| GSM4626766_TATTACCGTTGACGTT-1  | GSM4626766 | Normal |
| GSM4626766_TATTACCTCAATCTCT-1  | GSM4626766 | Normal |
| GSM4626766_TATTACCTCAGCAACT-1  | GSM4626766 | Normal |
| GSM4626766_TATTACCTCAGTTCGA-1  | GSM4626766 | Normal |
| GSM4626766_TATTACCTCCCTCAGT-1  | GSM4626766 | Normal |
| GSM4626766_TATTACCTCGGATGGA-1  | GSM4626766 | Normal |
| GSM4626766_TATTACCTCTGAAAGA-1  | GSM4626766 | Normal |
| GSM4626766_TCAACGAAGATATACG-1  | GSM4626766 | Normal |
| GSM4626766_TCAACGAAGCCGTCGT-1  | GSM4626766 | Normal |
| GSM4626766_TCAACGACAGGTGCCT-1  | GSM4626766 | Normal |
| GSM4626766_TCAACGAGTCATTAGC-1  | GSM4626766 | Normal |
| GSM4626766_TCAACGAGTCGCTTTC-1  | GSM4626766 | Normal |
| GSM4626766_TCAACGAGTCTGGTCG-1  | GSM4626766 | Normal |
| GSM4626766_TCAACGAGTTCGGGCT-1  | GSM4626766 | Normal |
| GSM4626766_TCAACGATCCGAATGT-1  | GSM4626766 | Normal |
| GSM4626766_TCAACGATCTCGATGA-1  | GSM4626766 | Normal |
| GSM4626766_TCAACGATCTTCTGGC-1  | GSM4626766 | Normal |
| GSM4626766_TCAACGATCTTGTACT-1  | GSM4626766 | Normal |
| GSM4626766_TCAATCTAGACAAGCC-1  | GSM4626766 | Normal |
| GSM4626766_TCAATCTAGAGGGCTT-1  | GSM4626766 | Normal |
| GSM4626766_TCAATCTAGATCCCAT-1  | GSM4626766 | Normal |
| GSM4626766_TCAATCTAGCGTGTCC-1  | GSM4626766 | Normal |
| GSM4626766_TCAATCTAGGCCGAAT-1  | GSM4626766 | Normal |
| GSM4626766_TCAATCTAGTTGAGAT-1  | GSM4626766 | Normal |
| GSM4626766_TCAATCTACCACCAG-1   | GSM4626766 | Normal |
| GSM4626766_TCAATCTGTAAGTGTA-1  | GSM4626766 | Normal |
| GSM4626766_TCAATCTGTCTAAAGA-1  | GSM4626766 | Normal |
| GSM4626766_TCAATCTTCAAGCCTA-1  | GSM4626766 | Normal |
| GSM4626766_TCAATCTTATAACCG-1   | GSM4626766 | Normal |
| GSM4626766_TCAATCTTCTGAGTGT-1  | GSM4626766 | Normal |
| GSM4626766_TCACAAGAGATTACCC-1  | GSM4626766 | Normal |
| GSM4626766_TCACAAGCAAGCTGTT-1  | GSM4626766 | Normal |
| GSM4626766_TCACAAGCAGACGCCT-1  | GSM4626766 | Normal |
| GSM4626766_TCACAAGCAGCCACCA-1  | GSM4626766 | Normal |
| GSM4626766_TCACAAGCATCACGAT-1  | GSM4626766 | Normal |
| GSM4626766_TCACAAGCATTACGAC-1  | GSM4626766 | Normal |
| GSM4626766_TCACAAGGTCCTGCTT-1  | GSM4626766 | Normal |
| GSM4626766_TCACAAGGTGCAACGA-1  | GSM4626766 | Normal |
| GSM4626766_TCACAAGGTGCCTGTG-1  | GSM4626766 | Normal |
| GSM4626766_TCACAAGGTGTTTCGAT-1 | GSM4626766 | Normal |
| GSM4626766_TCACAAGGTTGGAGGT-1  | GSM4626766 | Normal |
| GSM4626766_TCACAAGTCAGTACGT-1  | GSM4626766 | Normal |
| GSM4626766_TCACAAGTCATCGATG-1  | GSM4626766 | Normal |
| GSM4626766_TCACAAGTCCACGTGG-1  | GSM4626766 | Normal |
| GSM4626766_TCACAAGTCTTAACCT-1  | GSM4626766 | Normal |
| GSM4626766_TCACGAAAGAACTCGG-1  | GSM4626766 | Normal |
| GSM4626766_TCACGAAAGACGCACA-1  | GSM4626766 | Normal |
| GSM4626766_TCACGAAAGTACGCCA-1  | GSM4626766 | Normal |



|                                 |            |        |
|---------------------------------|------------|--------|
| GSM4626766_TCACGAAAGTCGCCGT-1   | GSM4626766 | Normal |
| GSM4626766_TCACGAAAGTCTCAAC-1   | GSM4626766 | Normal |
| GSM4626766_TCACGAACAACACTGCTA-1 | GSM4626766 | Normal |
| GSM4626766_TCACGAACATTGGGCC-1   | GSM4626766 | Normal |
| GSM4626766_TCACGAAGTAATTGGA-1   | GSM4626766 | Normal |
| GSM4626766_TCACGAAGTGACAAAT-1   | GSM4626766 | Normal |
| GSM4626766_TCACGAAGTTCTGAAC-1   | GSM4626766 | Normal |
| GSM4626766_TCACGAATCATAGCAC-1   | GSM4626766 | Normal |
| GSM4626766_TCACGAATCCAGTATG-1   | GSM4626766 | Normal |
| GSM4626766_TCACGAATCCGTCAA-1    | GSM4626766 | Normal |
| GSM4626766_TCACGAATCGCTGATA-1   | GSM4626766 | Normal |
| GSM4626766_TCACGAATCTAACTCT-1   | GSM4626766 | Normal |
| GSM4626766_TCACGAATCTAACTGG-1   | GSM4626766 | Normal |
| GSM4626766_TCAGATGAGCAATCTC-1   | GSM4626766 | Normal |
| GSM4626766_TCAGATGAGCTGCCCA-1   | GSM4626766 | Normal |
| GSM4626766_TCAGATGCAACGATCT-1   | GSM4626766 | Normal |
| GSM4626766_TCAGATGCACTTAACG-1   | GSM4626766 | Normal |
| GSM4626766_TCAGATGCAGCGTAAG-1   | GSM4626766 | Normal |
| GSM4626766_TCAGATGCATCCAACA-1   | GSM4626766 | Normal |
| GSM4626766_TCAGATGGTCGGCATC-1   | GSM4626766 | Normal |
| GSM4626766_TCAGATGGTTTCGCTC-1   | GSM4626766 | Normal |
| GSM4626766_TCAGATGTCTGGCGTG-1   | GSM4626766 | Normal |
| GSM4626766_TCAGATGTCTGGTGTA-1   | GSM4626766 | Normal |
| GSM4626766_TCAGCAAAGATGAGAG-1   | GSM4626766 | Normal |
| GSM4626766_TCAGCAAAGGACAGAA-1   | GSM4626766 | Normal |
| GSM4626766_TCAGCAACAGGGCATA-1   | GSM4626766 | Normal |
| GSM4626766_TCAGCAATCATGCTCC-1   | GSM4626766 | Normal |
| GSM4626766_TCAGCAATCGGAAACG-1   | GSM4626766 | Normal |
| GSM4626766_TCAGCAATCTAACCGA-1   | GSM4626766 | Normal |
| GSM4626766_TCAGCAATCTCTGAGA-1   | GSM4626766 | Normal |
| GSM4626766_TCAGCAATCTCTGCTG-1   | GSM4626766 | Normal |
| GSM4626766_TCAGCAATCTTGAGAC-1   | GSM4626766 | Normal |
| GSM4626766_TCAGCTCCAAGGACAC-1   | GSM4626766 | Normal |
| GSM4626766_TCAGCTCCACCTGGTG-1   | GSM4626766 | Normal |
| GSM4626766_TCAGCTCCAGTAAGAT-1   | GSM4626766 | Normal |
| GSM4626766_TCAGCTCCATGCCTAA-1   | GSM4626766 | Normal |
| GSM4626766_TCAGCTCGTAAGTGTA-1   | GSM4626766 | Normal |
| GSM4626766_TCAGCTCGTACCTACA-1   | GSM4626766 | Normal |
| GSM4626766_TCAGCTCGTCAGAAGC-1   | GSM4626766 | Normal |
| GSM4626766_TCAGCTCGTCCGAATT-1   | GSM4626766 | Normal |
| GSM4626766_TCAGCTCGTTAAGAAC-1   | GSM4626766 | Normal |
| GSM4626766_TCAGCTCGTTAGAACA-1   | GSM4626766 | Normal |
| GSM4626766_TCAGCTCGTTATCGGT-1   | GSM4626766 | Normal |
| GSM4626766_TCAGCTCGTTATTCTC-1   | GSM4626766 | Normal |
| GSM4626766_TCAGCTCGTTGTTTTG-1   | GSM4626766 | Normal |
| GSM4626766_TCAGCTCTCAGCGACC-1   | GSM4626766 | Normal |
| GSM4626766_TCAGGATAGACCTAGG-1   | GSM4626766 | Normal |
| GSM4626766_TCAGGATAGCTCTCGG-1   | GSM4626766 | Normal |
| GSM4626766_TCAGGATAGGCCCGTT-1   | GSM4626766 | Normal |
| GSM4626766_TCAGGATAGTAGCGGT-1   | GSM4626766 | Normal |
| GSM4626766_TCAGGATCAAAGAATC-1   | GSM4626766 | Normal |
| GSM4626766_TCAGGATCAATGCCAT-1   | GSM4626766 | Normal |
| GSM4626766_TCAGGATGTAGCTGCC-1   | GSM4626766 | Normal |
| GSM4626766_TCAGGATGTCCGACGT-1   | GSM4626766 | Normal |
| GSM4626766_TCAGGATGTGTCAATC-1   | GSM4626766 | Normal |
| GSM4626766_TCAGGATGTGTTTCGAT-1  | GSM4626766 | Normal |
| GSM4626766_TCAGGATTCATGCAAC-1   | GSM4626766 | Normal |

|                                |            |        |
|--------------------------------|------------|--------|
| GSM4626766_TCAGGATTCCGATATG-1  | GSM4626766 | Normal |
| GSM4626766_TCAGGATTCCCTAGAAC-1 | GSM4626766 | Normal |
| GSM4626766_TCAGGATTCTACTTAC-1  | GSM4626766 | Normal |
| GSM4626766_TCAGGATTCTGTCTCG-1  | GSM4626766 | Normal |
| GSM4626766_TCAGGTAAGATGTTAG-1  | GSM4626766 | Normal |
| GSM4626766_TCAGGTAAGCAGGCTA-1  | GSM4626766 | Normal |
| GSM4626766_TCAGGTAAGGCGACAT-1  | GSM4626766 | Normal |
| GSM4626766_TCAGGTAAGGCTAGGT-1  | GSM4626766 | Normal |
| GSM4626766_TCAGGTAAGGTAACT-1   | GSM4626766 | Normal |
| GSM4626766_TCAGGTACAAGCTGGA-1  | GSM4626766 | Normal |
| GSM4626766_TCAGGTACACCAGGCT-1  | GSM4626766 | Normal |
| GSM4626766_TCAGGTACATAGGATA-1  | GSM4626766 | Normal |
| GSM4626766_TCAGGTACATGGTCAT-1  | GSM4626766 | Normal |
| GSM4626766_TCAGGTAGTAATCGTC-1  | GSM4626766 | Normal |
| GSM4626766_TCAGGTAGTGAGGGTT-1  | GSM4626766 | Normal |
| GSM4626766_TCAGGTAGTGCTGTAT-1  | GSM4626766 | Normal |
| GSM4626766_TCAGGTATCCAGAGGA-1  | GSM4626766 | Normal |
| GSM4626766_TCAGGTATCCTTGCTC-1  | GSM4626766 | Normal |
| GSM4626766_TCATTACAGGAGTAGA-1  | GSM4626766 | Normal |
| GSM4626766_TCATTACCAAACCTAC-1  | GSM4626766 | Normal |
| GSM4626766_TCATTACCACAGACTT-1  | GSM4626766 | Normal |
| GSM4626766_TCATTACCAGAAGCAC-1  | GSM4626766 | Normal |
| GSM4626766_TCATTACCATGTCTCC-1  | GSM4626766 | Normal |
| GSM4626766_TCATTACTCCCTCTTT-1  | GSM4626766 | Normal |
| GSM4626766_TCATTACTCCTTCAAT-1  | GSM4626766 | Normal |
| GSM4626766_TCATTACTCGGCGGTT-1  | GSM4626766 | Normal |
| GSM4626766_TCATTTGCACATGACT-1  | GSM4626766 | Normal |
| GSM4626766_TCATTTGCACCTGGTG-1  | GSM4626766 | Normal |
| GSM4626766_TCATTTGGTATGAAAC-1  | GSM4626766 | Normal |
| GSM4626766_TCATTTGGTCGCCATG-1  | GSM4626766 | Normal |
| GSM4626766_TCATTTGGTCTCACCT-1  | GSM4626766 | Normal |
| GSM4626766_TCATTTGGTCTGGAGA-1  | GSM4626766 | Normal |
| GSM4626766_TCATTTGGTTAGCTG-1   | GSM4626766 | Normal |
| GSM4626766_TCATTTGTCAACCATG-1  | GSM4626766 | Normal |
| GSM4626766_TCATTTGTCACAATGC-1  | GSM4626766 | Normal |
| GSM4626766_TCATTTGTCAGCGACC-1  | GSM4626766 | Normal |
| GSM4626766_TCATTTGTCATACGGT-1  | GSM4626766 | Normal |
| GSM4626766_TCATTTGTCATGCATG-1  | GSM4626766 | Normal |
| GSM4626766_TCATTTGTCCCTAATT-1  | GSM4626766 | Normal |
| GSM4626766_TCATTTGTCTCGTATT-1  | GSM4626766 | Normal |
| GSM4626766_TCATTTGTCTTGAGGT-1  | GSM4626766 | Normal |
| GSM4626766_TCCACACAGGAATGGA-1  | GSM4626766 | Normal |
| GSM4626766_TCCACACAGTGGTAGC-1  | GSM4626766 | Normal |
| GSM4626766_TCCACACGTGGGTCAA-1  | GSM4626766 | Normal |
| GSM4626766_TCCACACTCTGCGACG-1  | GSM4626766 | Normal |
| GSM4626766_TCCACACTCTGCGGCA-1  | GSM4626766 | Normal |
| GSM4626766_TCCCGATAGATGTCGG-1  | GSM4626766 | Normal |
| GSM4626766_TCCCGATAGATGTTAG-1  | GSM4626766 | Normal |
| GSM4626766_TCCCGATCAGCCTATA-1  | GSM4626766 | Normal |
| GSM4626766_TCCCGATCATCACAAAC-1 | GSM4626766 | Normal |
| GSM4626766_TCCCGATGTCTAGCGC-1  | GSM4626766 | Normal |
| GSM4626766_TCCCGATGTCTAGTGT-1  | GSM4626766 | Normal |
| GSM4626766_TCCCGATTCCATTCTA-1  | GSM4626766 | Normal |
| GSM4626766_TCCCGATTCTGTGCT-1   | GSM4626766 | Normal |
| GSM4626766_TCCCGATTCTGTACGA-1  | GSM4626766 | Normal |
| GSM4626766_TCGAGGCAGACCACGA-1  | GSM4626766 | Normal |
| GSM4626766_TCGAGGCAGCTCCTTC-1  | GSM4626766 | Normal |

|                                |            |        |
|--------------------------------|------------|--------|
| GSM4626766_TCGAGGCAGGAGTACC-1  | GSM4626766 | Normal |
| GSM4626766_TCGAGGCAGTCGATAA-1  | GSM4626766 | Normal |
| GSM4626766_TCGAGGCCAAGTAGTA-1  | GSM4626766 | Normal |
| GSM4626766_TCGAGGCCAATCAGAA-1  | GSM4626766 | Normal |
| GSM4626766_TCGAGGCCAATGCCAT-1  | GSM4626766 | Normal |
| GSM4626766_TCGAGGCCAATGGAGC-1  | GSM4626766 | Normal |
| GSM4626766_TCGAGGCCACCCATTC-1  | GSM4626766 | Normal |
| GSM4626766_TCGAGGCCACGAGAGT-1  | GSM4626766 | Normal |
| GSM4626766_TCGAGGCCATTAGGCT-1  | GSM4626766 | Normal |
| GSM4626766_TCGAGGCCATTGCGGC-1  | GSM4626766 | Normal |
| GSM4626766_TCGAGGCGTAAACGCG-1  | GSM4626766 | Normal |
| GSM4626766_TCGAGGCGTTCGTCTC-1  | GSM4626766 | Normal |
| GSM4626766_TCGAGGCTCCAAACAC-1  | GSM4626766 | Normal |
| GSM4626766_TCGCGAGAGAGGGCTT-1  | GSM4626766 | Normal |
| GSM4626766_TCGCGAGAGAGTCTGG-1  | GSM4626766 | Normal |
| GSM4626766_TCGCGAGAGGCATGTG-1  | GSM4626766 | Normal |
| GSM4626766_TCGCGAGAGGGAGTAA-1  | GSM4626766 | Normal |
| GSM4626766_TCGCGAGCAAGTCTGT-1  | GSM4626766 | Normal |
| GSM4626766_TCGCGAGCAGGGATTG-1  | GSM4626766 | Normal |
| GSM4626766_TCGCGAGCAGTCACTA-1  | GSM4626766 | Normal |
| GSM4626766_TCGCGAGCATAGACTC-1  | GSM4626766 | Normal |
| GSM4626766_TCGCGAGGTAAGGGCT-1  | GSM4626766 | Normal |
| GSM4626766_TCGCGAGGTCATACTG-1  | GSM4626766 | Normal |
| GSM4626766_TCGCGAGGTCCATCCT-1  | GSM4626766 | Normal |
| GSM4626766_TCGCGAGGTCTAGCGC-1  | GSM4626766 | Normal |
| GSM4626766_TCGCGAGGTGGCCCTA-1  | GSM4626766 | Normal |
| GSM4626766_TCGCGAGGTTATTCTC-1  | GSM4626766 | Normal |
| GSM4626766_TCGCGAGTCAGGCCCA-1  | GSM4626766 | Normal |
| GSM4626766_TCGCGAGTCCTTGCCA-1  | GSM4626766 | Normal |
| GSM4626766_TCGCGTTAGAACTCGG-1  | GSM4626766 | Normal |
| GSM4626766_TCGCGTTCAAAGGTGC-1  | GSM4626766 | Normal |
| GSM4626766_TCGCGTTCAACGCACC-1  | GSM4626766 | Normal |
| GSM4626766_TCGCGTTCAAGACACG-1  | GSM4626766 | Normal |
| GSM4626766_TCGCGTTCAATCTGCA-1  | GSM4626766 | Normal |
| GSM4626766_TCGCGTTCACCATCCT-1  | GSM4626766 | Normal |
| GSM4626766_TCGCGTTCACCCTATC-1  | GSM4626766 | Normal |
| GSM4626766_TCGCGTTGTCTAAACC-1  | GSM4626766 | Normal |
| GSM4626766_TCGCGTTGTCTAGGTT-1  | GSM4626766 | Normal |
| GSM4626766_TCGCGTTTCTACAGA-1   | GSM4626766 | Normal |
| GSM4626766_TCGCGTTTCTGCCAT-1   | GSM4626766 | Normal |
| GSM4626766_TCGCGTTTCTGCGTAA-1  | GSM4626766 | Normal |
| GSM4626766_TCGCGTTTCTTTAGTC-1  | GSM4626766 | Normal |
| GSM4626766_TCGGGACAGAACAAC-1   | GSM4626766 | Normal |
| GSM4626766_TCGGGACAGAAGGTGA-1  | GSM4626766 | Normal |
| GSM4626766_TCGGGACAGATAGCAT-1  | GSM4626766 | Normal |
| GSM4626766_TCGGGACAGCGCTCCA-1  | GSM4626766 | Normal |
| GSM4626766_TCGGGACAGTGCCAGA-1  | GSM4626766 | Normal |
| GSM4626766_TCGGGACAGTGTGAAT-1  | GSM4626766 | Normal |
| GSM4626766_TCGGGACCATCTATGG-1  | GSM4626766 | Normal |
| GSM4626766_TCGGGACGTTCGGCTCA-1 | GSM4626766 | Normal |
| GSM4626766_TCGGGACGTCTAGCGC-1  | GSM4626766 | Normal |
| GSM4626766_TCGGGACGTGTCAATC-1  | GSM4626766 | Normal |
| GSM4626766_TCGGGACGTTCTGTTT-1  | GSM4626766 | Normal |
| GSM4626766_TCGGGACTCACCTTAT-1  | GSM4626766 | Normal |
| GSM4626766_TCGGTAAAGGAGTACC-1  | GSM4626766 | Normal |
| GSM4626766_TCGGTAAAGGTTACCT-1  | GSM4626766 | Normal |
| GSM4626766_TCGGTAAAGTCATGCT-1  | GSM4626766 | Normal |

|                                |            |        |
|--------------------------------|------------|--------|
| GSM4626766_TCGGTAAAGTCCTCCT-1  | GSM4626766 | Normal |
| GSM4626766_TCGGTAACACGAAATA-1  | GSM4626766 | Normal |
| GSM4626766_TCGGTAACAGATTGCT-1  | GSM4626766 | Normal |
| GSM4626766_TCGGTAACAGTCGTGC-1  | GSM4626766 | Normal |
| GSM4626766_TCGGTAACAGTCTTCC-1  | GSM4626766 | Normal |
| GSM4626766_TCGGTAACATGTTCCC-1  | GSM4626766 | Normal |
| GSM4626766_TCGGTAAGTCGAGATG-1  | GSM4626766 | Normal |
| GSM4626766_TCGGTAAGTTGCGCAC-1  | GSM4626766 | Normal |
| GSM4626766_TCGGTAATCCAGAAGG-1  | GSM4626766 | Normal |
| GSM4626766_TCGGTAATCCGCTGTT-1  | GSM4626766 | Normal |
| GSM4626766_TCGGTAATCCTCAATT-1  | GSM4626766 | Normal |
| GSM4626766_TCGTACCAGATGCGAC-1  | GSM4626766 | Normal |
| GSM4626766_TCGTACCAGCGTCTAT-1  | GSM4626766 | Normal |
| GSM4626766_TCGTACCAGTGGTAGC-1  | GSM4626766 | Normal |
| GSM4626766_TCGTACCCAAGGTTCT-1  | GSM4626766 | Normal |
| GSM4626766_TCGTACCCACCAGATT-1  | GSM4626766 | Normal |
| GSM4626766_TCGTACCCAGCGATCC-1  | GSM4626766 | Normal |
| GSM4626766_TCGTACCGTTCAGACT-1  | GSM4626766 | Normal |
| GSM4626766_TCGTACCTCACGGTTA-1  | GSM4626766 | Normal |
| GSM4626766_TCGTACCTCATGGTCA-1  | GSM4626766 | Normal |
| GSM4626766_TCGTACCTCCACGTGG-1  | GSM4626766 | Normal |
| GSM4626766_TCGTACCTCCGCAAGC-1  | GSM4626766 | Normal |
| GSM4626766_TCGTACCTCCTGCTTG-1  | GSM4626766 | Normal |
| GSM4626766_TCGTACCTCCTTCAAT-1  | GSM4626766 | Normal |
| GSM4626766_TCGTACCTCGGAATCT-1  | GSM4626766 | Normal |
| GSM4626766_TCGTACCTCGGTTCCGG-1 | GSM4626766 | Normal |
| GSM4626766_TCGTACCTCTTGTATC-1  | GSM4626766 | Normal |
| GSM4626766_TCGTAGAAGAAGAAGC-1  | GSM4626766 | Normal |
| GSM4626766_TCGTAGAAGGAGTTGC-1  | GSM4626766 | Normal |
| GSM4626766_TCGTAGAAGGTTTTCT-1  | GSM4626766 | Normal |
| GSM4626766_TCGTAGAAGGTCGGAT-1  | GSM4626766 | Normal |
| GSM4626766_TCGTAGAAGTTGCAGG-1  | GSM4626766 | Normal |
| GSM4626766_TCGTAGACACTTGGAT-1  | GSM4626766 | Normal |
| GSM4626766_TCGTAGACAGATCTGT-1  | GSM4626766 | Normal |
| GSM4626766_TCGTAGACATCACAAC-1  | GSM4626766 | Normal |
| GSM4626766_TCGTAGAGTAAGTTCC-1  | GSM4626766 | Normal |
| GSM4626766_TCGTAGAGTATCGCAT-1  | GSM4626766 | Normal |
| GSM4626766_TCGTAGAGTATGAATG-1  | GSM4626766 | Normal |
| GSM4626766_TCGTAGAGTCGTTGTA-1  | GSM4626766 | Normal |
| GSM4626766_TCGTAGAGTTAAAGAC-1  | GSM4626766 | Normal |
| GSM4626766_TCGTAGAGTTCGCGAC-1  | GSM4626766 | Normal |
| GSM4626766_TCGTAGAGTTGACGTT-1  | GSM4626766 | Normal |
| GSM4626766_TCGTAGAGTTGGACA-1   | GSM4626766 | Normal |
| GSM4626766_TCGTAGAGTTGTTTTG-1  | GSM4626766 | Normal |
| GSM4626766_TCGTAGATCAGAGCTT-1  | GSM4626766 | Normal |
| GSM4626766_TCTATTGAGCTTTGGT-1  | GSM4626766 | Normal |
| GSM4626766_TCTATTGAGGCAATTA-1  | GSM4626766 | Normal |
| GSM4626766_TCTATTGCAATCTACG-1  | GSM4626766 | Normal |
| GSM4626766_TCTATTGCACGAGGTA-1  | GSM4626766 | Normal |
| GSM4626766_TCTATTGCAGTCACTA-1  | GSM4626766 | Normal |
| GSM4626766_TCTATTGCATCACAAC-1  | GSM4626766 | Normal |
| GSM4626766_TCTATTGGTAAATACG-1  | GSM4626766 | Normal |
| GSM4626766_TCTATTGGTCCATCCT-1  | GSM4626766 | Normal |
| GSM4626766_TCTATTGGTTGTGGCC-1  | GSM4626766 | Normal |
| GSM4626766_TCTATTGTCAGGCAAG-1  | GSM4626766 | Normal |
| GSM4626766_TCTATTGTCCCAGGTG-1  | GSM4626766 | Normal |
| GSM4626766_TCTATTGTCTAGGGC-1   | GSM4626766 | Normal |

|                                |            |        |
|--------------------------------|------------|--------|
| GSM4626766_TCTATTGTCCTGTACC-1  | GSM4626766 | Normal |
| GSM4626766_TCTATTGTCTTGGGTA-1  | GSM4626766 | Normal |
| GSM4626766_TCTCATAAGAGTACAT-1  | GSM4626766 | Normal |
| GSM4626766_TCTCATAAGCCCAGCT-1  | GSM4626766 | Normal |
| GSM4626766_TCTCATAAGCGACGTA-1  | GSM4626766 | Normal |
| GSM4626766_TCTCATAAGTGACATA-1  | GSM4626766 | Normal |
| GSM4626766_TCTCATAACAAGGGTCA-1 | GSM4626766 | Normal |
| GSM4626766_TCTCATAACCGCTAG-1   | GSM4626766 | Normal |
| GSM4626766_TCTCATAACGAAAGC-1   | GSM4626766 | Normal |
| GSM4626766_TCTCATAACTTACGA-1   | GSM4626766 | Normal |
| GSM4626766_TCTCATAACAGTTAACC-1 | GSM4626766 | Normal |
| GSM4626766_TCTCATAACATGCCACG-1 | GSM4626766 | Normal |
| GSM4626766_TCTCATAGTAAACCTC-1  | GSM4626766 | Normal |
| GSM4626766_TCTCATAGTATGGTTC-1  | GSM4626766 | Normal |
| GSM4626766_TCTCATAGTATTAGCC-1  | GSM4626766 | Normal |
| GSM4626766_TCTCATAGTCCAGTAT-1  | GSM4626766 | Normal |
| GSM4626766_TCTCATAGTTAAGACA-1  | GSM4626766 | Normal |
| GSM4626766_TCTCATAGTTGATTTCG-1 | GSM4626766 | Normal |
| GSM4626766_TCTCATATCCACGTGG-1  | GSM4626766 | Normal |
| GSM4626766_TCTCATATCGAACTGT-1  | GSM4626766 | Normal |
| GSM4626766_TCTCTAAAGACCACGA-1  | GSM4626766 | Normal |
| GSM4626766_TCTCTAAAGCGTCTAT-1  | GSM4626766 | Normal |
| GSM4626766_TCTCTAAAGCTCCCAG-1  | GSM4626766 | Normal |
| GSM4626766_TCTCTAAAGGCGTACA-1  | GSM4626766 | Normal |
| GSM4626766_TCTCTAAAGGCTCAGA-1  | GSM4626766 | Normal |
| GSM4626766_TCTCTAAAGTTACGGG-1  | GSM4626766 | Normal |
| GSM4626766_TCTCTAACAAATGTAAG-1 | GSM4626766 | Normal |
| GSM4626766_TCTCTAACACTTAAGC-1  | GSM4626766 | Normal |
| GSM4626766_TCTCTAAGTAGTAGTA-1  | GSM4626766 | Normal |
| GSM4626766_TCTCTAAGTCAATACC-1  | GSM4626766 | Normal |
| GSM4626766_TCTCTAAGTCCTAGCG-1  | GSM4626766 | Normal |
| GSM4626766_TCTCTAAGTCTCCATC-1  | GSM4626766 | Normal |
| GSM4626766_TCTCTAAGTTAGGGTG-1  | GSM4626766 | Normal |
| GSM4626766_TCTCTAATCACTCTTA-1  | GSM4626766 | Normal |
| GSM4626766_TCTCTAATCCTTTCTC-1  | GSM4626766 | Normal |
| GSM4626766_TCTGAGAAGAATCCC-1   | GSM4626766 | Normal |
| GSM4626766_TCTGAGAAGGGTTCCC-1  | GSM4626766 | Normal |
| GSM4626766_TCTGAGACAAGGTTTC-1  | GSM4626766 | Normal |
| GSM4626766_TCTGAGACACAGACAG-1  | GSM4626766 | Normal |
| GSM4626766_TCTGAGACACCAGGCT-1  | GSM4626766 | Normal |
| GSM4626766_TCTGAGACAGTATCTG-1  | GSM4626766 | Normal |
| GSM4626766_TCTGAGACATTGACA-1   | GSM4626766 | Normal |
| GSM4626766_TCTGAGAGTACCTACA-1  | GSM4626766 | Normal |
| GSM4626766_TCTGAGAGTCAGGACA-1  | GSM4626766 | Normal |
| GSM4626766_TCTGAGAGTCCCTTGT-1  | GSM4626766 | Normal |
| GSM4626766_TCTGAGAGTCGGTCT-1   | GSM4626766 | Normal |
| GSM4626766_TCTGAGAGTTCGGCAC-1  | GSM4626766 | Normal |
| GSM4626766_TCTGAGATCAACACTG-1  | GSM4626766 | Normal |
| GSM4626766_TCTGAGATCATCGCTC-1  | GSM4626766 | Normal |
| GSM4626766_TCTGAGATCCCTTGCA-1  | GSM4626766 | Normal |
| GSM4626766_TCTGAGATCGCATGGC-1  | GSM4626766 | Normal |
| GSM4626766_TCTGAGATCTGATACG-1  | GSM4626766 | Normal |
| GSM4626766_TCTGAGATCTGGTTCC-1  | GSM4626766 | Normal |
| GSM4626766_TCTGGAAAGACACTAA-1  | GSM4626766 | Normal |
| GSM4626766_TCTGGAAAGAGGGCTT-1  | GSM4626766 | Normal |
| GSM4626766_TCTGGAAAGGACTGGT-1  | GSM4626766 | Normal |
| GSM4626766_TCTGGAAAGGTGCAAC-1  | GSM4626766 | Normal |

|                                |            |        |
|--------------------------------|------------|--------|
| GSM4626766_TCTGGAACATAAGACA-1  | GSM4626766 | Normal |
| GSM4626766_TCTGGAATCTGTGCAA-1  | GSM4626766 | Normal |
| GSM4626766_TCTGGAATCTTATCTG-1  | GSM4626766 | Normal |
| GSM4626766_TCTGGAATCTTGTCAT-1  | GSM4626766 | Normal |
| GSM4626766_TCTTCGGAGACTACAA-1  | GSM4626766 | Normal |
| GSM4626766_TCTTCGGAGAGTCTGG-1  | GSM4626766 | Normal |
| GSM4626766_TCTTCGGAGATCCCGC-1  | GSM4626766 | Normal |
| GSM4626766_TCTTCGGAGATCTGAA-1  | GSM4626766 | Normal |
| GSM4626766_TCTTCGGAGTGTACCT-1  | GSM4626766 | Normal |
| GSM4626766_TCTTCGGCACTTCGAA-1  | GSM4626766 | Normal |
| GSM4626766_TCTTCGGCAGCTGGCT-1  | GSM4626766 | Normal |
| GSM4626766_TCTTCGGGTGTGACCC-1  | GSM4626766 | Normal |
| GSM4626766_TCTTCGGGTTTCAATC-1  | GSM4626766 | Normal |
| GSM4626766_TCTTCGGTCCAGAAGG-1  | GSM4626766 | Normal |
| GSM4626766_TCTTCGGTCCATGCTC-1  | GSM4626766 | Normal |
| GSM4626766_TCTTCGGTCCCGACTT-1  | GSM4626766 | Normal |
| GSM4626766_TCTTCGGTCCGAACGC-1  | GSM4626766 | Normal |
| GSM4626766_TCTTCGGTCCTTTACA-1  | GSM4626766 | Normal |
| GSM4626766_TCTTCGGTCTCGGACG-1  | GSM4626766 | Normal |
| GSM4626766_TCTTTCCAGAGCTTCT-1  | GSM4626766 | Normal |
| GSM4626766_TCTTTCCAGATAGGAG-1  | GSM4626766 | Normal |
| GSM4626766_TCTTTCCAGCCGATTT-1  | GSM4626766 | Normal |
| GSM4626766_TCTTTCCAGCGCTCCA-1  | GSM4626766 | Normal |
| GSM4626766_TCTTTCCAGCTCCTTC-1  | GSM4626766 | Normal |
| GSM4626766_TCTTTCCCAAAGCAAT-1  | GSM4626766 | Normal |
| GSM4626766_TCTTTCCCACTAAGTC-1  | GSM4626766 | Normal |
| GSM4626766_TCTTTCCGTACCGTTA-1  | GSM4626766 | Normal |
| GSM4626766_TCTTTCCGTGAGTATA-1  | GSM4626766 | Normal |
| GSM4626766_TCTTTCTCAGCTGGC-1   | GSM4626766 | Normal |
| GSM4626766_TCTTTCTCATAACGGT-1  | GSM4626766 | Normal |
| GSM4626766_TCTTTCTCATTGCGA-1   | GSM4626766 | Normal |
| GSM4626766_TCTTTCTCTAAGCCA-1   | GSM4626766 | Normal |
| GSM4626766_TCTTTCTCTCCGGTT-1   | GSM4626766 | Normal |
| GSM4626766_TCTTTCTCTTGACGA-1   | GSM4626766 | Normal |
| GSM4626766_TGAAAGAAGCTAAGAT-1  | GSM4626766 | Normal |
| GSM4626766_TGAAAGAAGGACACCA-1  | GSM4626766 | Normal |
| GSM4626766_TGAAAGAAGTACCGGA-1  | GSM4626766 | Normal |
| GSM4626766_TGAAAGAAGTGAGAA-1   | GSM4626766 | Normal |
| GSM4626766_TGAAAGACAGGATTGG-1  | GSM4626766 | Normal |
| GSM4626766_TGAAAGACATGCCTTC-1  | GSM4626766 | Normal |
| GSM4626766_TGAAAGAGTACTCTCC-1  | GSM4626766 | Normal |
| GSM4626766_TGAAAGAGTTCTGAAC-1  | GSM4626766 | Normal |
| GSM4626766_TGAAAGATCATCGCTC-1  | GSM4626766 | Normal |
| GSM4626766_TGACAACAGAACAATC-1  | GSM4626766 | Normal |
| GSM4626766_TGACAACAGCAGCCTC-1  | GSM4626766 | Normal |
| GSM4626766_TGACAACAGCTAGTTC-1  | GSM4626766 | Normal |
| GSM4626766_TGACAACAGGCGACAT-1  | GSM4626766 | Normal |
| GSM4626766_TGACAACAGTCCGGTC-1  | GSM4626766 | Normal |
| GSM4626766_TGACAACAGTTTGCCT-1  | GSM4626766 | Normal |
| GSM4626766_TGACAACCAACACGCC-1  | GSM4626766 | Normal |
| GSM4626766_TGACAACCAACGATGG-1  | GSM4626766 | Normal |
| GSM4626766_TGACAACCACACATGT-1  | GSM4626766 | Normal |
| GSM4626766_TGACAACCACCACCAG-1  | GSM4626766 | Normal |
| GSM4626766_TGACAACCACCTTACGA-1 | GSM4626766 | Normal |
| GSM4626766_TGACAACCAGTCGTGC-1  | GSM4626766 | Normal |
| GSM4626766_TGACAACGTAAGTTCC-1  | GSM4626766 | Normal |
| GSM4626766_TGACAACGTCCGCATC-1  | GSM4626766 | Normal |

|                                |            |        |
|--------------------------------|------------|--------|
| GSM4626766_TGACAACGTCTCCATC-1  | GSM4626766 | Normal |
| GSM4626766_TGACAACGTGCACGAA-1  | GSM4626766 | Normal |
| GSM4626766_TGACAACGTTACAGAA-1  | GSM4626766 | Normal |
| GSM4626766_TGACAACGTTCAGACT-1  | GSM4626766 | Normal |
| GSM4626766_TGACAACCTCACGAAGG-1 | GSM4626766 | Normal |
| GSM4626766_TGACAACCTCTCGGACG-1 | GSM4626766 | Normal |
| GSM4626766_TGACGGCAGAAACGAG-1  | GSM4626766 | Normal |
| GSM4626766_TGACGGCAGTGAACGC-1  | GSM4626766 | Normal |
| GSM4626766_TGACGGCAGTGGAGTC-1  | GSM4626766 | Normal |
| GSM4626766_TGACGGCCAAACCCAT-1  | GSM4626766 | Normal |
| GSM4626766_TGACGGCGTAGGCTGA-1  | GSM4626766 | Normal |
| GSM4626766_TGACGGCGTATAATGG-1  | GSM4626766 | Normal |
| GSM4626766_TGACGGCTCACGATGT-1  | GSM4626766 | Normal |
| GSM4626766_TGACGGCTCCTCAATT-1  | GSM4626766 | Normal |
| GSM4626766_TGACGGCTCTTCGAGA-1  | GSM4626766 | Normal |
| GSM4626766_TGACTAGAGAGCTGGT-1  | GSM4626766 | Normal |
| GSM4626766_TGACTAGAGGGCTTGA-1  | GSM4626766 | Normal |
| GSM4626766_TGACTAGAGTAGGTGC-1  | GSM4626766 | Normal |
| GSM4626766_TGACTAGCACCACCAG-1  | GSM4626766 | Normal |
| GSM4626766_TGACTAGCATCTATGG-1  | GSM4626766 | Normal |
| GSM4626766_TGACTAGCATGCCACG-1  | GSM4626766 | Normal |
| GSM4626766_TGACTAGCATGTAGTC-1  | GSM4626766 | Normal |
| GSM4626766_TGACTAGGTAAATACG-1  | GSM4626766 | Normal |
| GSM4626766_TGACTAGGTCCGATCC-1  | GSM4626766 | Normal |
| GSM4626766_TGACTAGGTGAAGGCT-1  | GSM4626766 | Normal |
| GSM4626766_TGACTAGGTTACGACT-1  | GSM4626766 | Normal |
| GSM4626766_TGACTAGGTTGGTTTG-1  | GSM4626766 | Normal |
| GSM4626766_TGACTAGTCCTCAATT-1  | GSM4626766 | Normal |
| GSM4626766_TGACTAGTCGCCTGTT-1  | GSM4626766 | Normal |
| GSM4626766_TGACTAGTCTTAGAGC-1  | GSM4626766 | Normal |
| GSM4626766_TGACTTTAGACTCGGA-1  | GSM4626766 | Normal |
| GSM4626766_TGACTTTAGCCATCGC-1  | GSM4626766 | Normal |
| GSM4626766_TGACTTTAGCGAAGGG-1  | GSM4626766 | Normal |
| GSM4626766_TGACTTTAGGAATTAC-1  | GSM4626766 | Normal |
| GSM4626766_TGACTTTAGTGTGAAT-1  | GSM4626766 | Normal |
| GSM4626766_TGACTTTCAACCGCCA-1  | GSM4626766 | Normal |
| GSM4626766_TGACTTTCAAGACACG-1  | GSM4626766 | Normal |
| GSM4626766_TGACTTTCACCGTTGG-1  | GSM4626766 | Normal |
| GSM4626766_TGACTTTCAGACACTT-1  | GSM4626766 | Normal |
| GSM4626766_TGACTTTCAGCGTAAG-1  | GSM4626766 | Normal |
| GSM4626766_TGACTTTCATTGGCGC-1  | GSM4626766 | Normal |
| GSM4626766_TGACTTTGTAATAGCA-1  | GSM4626766 | Normal |
| GSM4626766_TGACTTTGTAATCGTC-1  | GSM4626766 | Normal |
| GSM4626766_TGACTTTGTAATTGGA-1  | GSM4626766 | Normal |
| GSM4626766_TGACTTTGTCTGATCA-1  | GSM4626766 | Normal |
| GSM4626766_TGACTTTGTGTCAATC-1  | GSM4626766 | Normal |
| GSM4626766_TGACTTTGTTCCAACA-1  | GSM4626766 | Normal |
| GSM4626766_TGACTTTTCAACACAC-1  | GSM4626766 | Normal |
| GSM4626766_TGACTTTTTCAGATAAG-1 | GSM4626766 | Normal |
| GSM4626766_TGACTTTTTCAGCCTAA-1 | GSM4626766 | Normal |
| GSM4626766_TGACTTTTTCAGGATCT-1 | GSM4626766 | Normal |
| GSM4626766_TGAGAGGAGAACTGTA-1  | GSM4626766 | Normal |
| GSM4626766_TGAGAGGAGTAGCGGT-1  | GSM4626766 | Normal |
| GSM4626766_TGAGAGGCAATCTACG-1  | GSM4626766 | Normal |
| GSM4626766_TGAGAGGCACATAACC-1  | GSM4626766 | Normal |
| GSM4626766_TGAGAGGCACTATCTT-1  | GSM4626766 | Normal |
| GSM4626766_TGAGAGGCATCTCGCT-1  | GSM4626766 | Normal |

|                               |            |        |
|-------------------------------|------------|--------|
| GSM4626766_TGAGAGGCATGCAATC-1 | GSM4626766 | Normal |
| GSM4626766_TGAGAGGCATGCTGGC-1 | GSM4626766 | Normal |
| GSM4626766_TGAGAGGGTAGAGGAA-1 | GSM4626766 | Normal |
| GSM4626766_TGAGAGGGTAGGCATG-1 | GSM4626766 | Normal |
| GSM4626766_TGAGAGGGTCATGCCG-1 | GSM4626766 | Normal |
| GSM4626766_TGAGAGGGTCTGCCAG-1 | GSM4626766 | Normal |
| GSM4626766_TGAGAGGGTGAGCGAT-1 | GSM4626766 | Normal |
| GSM4626766_TGAGAGGGTGAGGCTA-1 | GSM4626766 | Normal |
| GSM4626766_TGAGAGGGTGAAAGA-1  | GSM4626766 | Normal |
| GSM4626766_TGAGAGGTCACCATAG-1 | GSM4626766 | Normal |
| GSM4626766_TGAGAGGTCAGGCCA-1  | GSM4626766 | Normal |
| GSM4626766_TGAGAGGTCGACAGCC-1 | GSM4626766 | Normal |
| GSM4626766_TGAGAGGTCGCGTTTC-1 | GSM4626766 | Normal |
| GSM4626766_TGAGAGGTCTAGACA-1  | GSM4626766 | Normal |
| GSM4626766_TGAGAGGTCTCTGAGA-1 | GSM4626766 | Normal |
| GSM4626766_TGAGCATAGATCCCGC-1 | GSM4626766 | Normal |
| GSM4626766_TGAGCATAGCTAACTC-1 | GSM4626766 | Normal |
| GSM4626766_TGAGCATAGTGAACAT-1 | GSM4626766 | Normal |
| GSM4626766_TGAGCATAGTGTCCCG-1 | GSM4626766 | Normal |
| GSM4626766_TGAGCATCAACACCTA-1 | GSM4626766 | Normal |
| GSM4626766_TGAGCATCACGCGAAA-1 | GSM4626766 | Normal |
| GSM4626766_TGAGCATCATAACATG-1 | GSM4626766 | Normal |
| GSM4626766_TGAGCATCATGAAGTA-1 | GSM4626766 | Normal |
| GSM4626766_TGAGCATGTGCTTCTC-1 | GSM4626766 | Normal |
| GSM4626766_TGAGCATTCCATTCTA-1 | GSM4626766 | Normal |
| GSM4626766_TGAGCATTCTCATT-1   | GSM4626766 | Normal |
| GSM4626766_TGAGCATTCTGTTGCC-1 | GSM4626766 | Normal |
| GSM4626766_TGAGCATTCTTGTACT-1 | GSM4626766 | Normal |
| GSM4626766_TGAGCCGAGAGTCTGG-1 | GSM4626766 | Normal |
| GSM4626766_TGAGCCGAGAGTGACC-1 | GSM4626766 | Normal |
| GSM4626766_TGAGCCGAGATAGTCA-1 | GSM4626766 | Normal |
| GSM4626766_TGAGCCGAGATCTGCT-1 | GSM4626766 | Normal |
| GSM4626766_TGAGCCGAGGCTAGGT-1 | GSM4626766 | Normal |
| GSM4626766_TGAGCCGAGTAGCCGA-1 | GSM4626766 | Normal |
| GSM4626766_TGAGCCGCAAGCCAC-1  | GSM4626766 | Normal |
| GSM4626766_TGAGCCGCAATCTACG-1 | GSM4626766 | Normal |
| GSM4626766_TGAGCCGCAAGTACAG-1 | GSM4626766 | Normal |
| GSM4626766_TGAGCCGGTAAACCTC-1 | GSM4626766 | Normal |
| GSM4626766_TGAGCCGGTGAAATCA-1 | GSM4626766 | Normal |
| GSM4626766_TGAGCCGGTGACAAAT-1 | GSM4626766 | Normal |
| GSM4626766_TGAGCCGTCATGCAAC-1 | GSM4626766 | Normal |
| GSM4626766_TGAGCCGTCCGAGCCA-1 | GSM4626766 | Normal |
| GSM4626766_TGAGCCGTCTTAATC-1  | GSM4626766 | Normal |
| GSM4626766_TGAGCCGTCTAACTGG-1 | GSM4626766 | Normal |
| GSM4626766_TGAGCCGTCTGCGTAA-1 | GSM4626766 | Normal |
| GSM4626766_TGAGCCGTCTTCGAGA-1 | GSM4626766 | Normal |
| GSM4626766_TGAGCCGTCTTGTCAT-1 | GSM4626766 | Normal |
| GSM4626766_TGAGGGAAGGGATACC-1 | GSM4626766 | Normal |
| GSM4626766_TGAGGGACAACACCTA-1 | GSM4626766 | Normal |
| GSM4626766_TGAGGGACACCCAGTG-1 | GSM4626766 | Normal |
| GSM4626766_TGAGGGACACGGACAA-1 | GSM4626766 | Normal |
| GSM4626766_TGAGGGACACTATCTT-1 | GSM4626766 | Normal |
| GSM4626766_TGAGGGACAGCCAGAA-1 | GSM4626766 | Normal |
| GSM4626766_TGAGGGACAGCCTGTG-1 | GSM4626766 | Normal |
| GSM4626766_TGAGGGACATTCTGTC-1 | GSM4626766 | Normal |
| GSM4626766_TGAGGGAGTATAAACG-1 | GSM4626766 | Normal |
| GSM4626766_TGAGGGAGTATATGGA-1 | GSM4626766 | Normal |



|                                 |            |        |
|---------------------------------|------------|--------|
| GSM4626766_TGAGGGAGTGCGATAG-1   | GSM4626766 | Normal |
| GSM4626766_TGAGGGAGTGTTGAGG-1   | GSM4626766 | Normal |
| GSM4626766_TGAGGGATCAACCATG-1   | GSM4626766 | Normal |
| GSM4626766_TGAGGGATCACTCCTG-1   | GSM4626766 | Normal |
| GSM4626766_TGAGGGATCATATCGG-1   | GSM4626766 | Normal |
| GSM4626766_TGAGGGATCGGCGCTA-1   | GSM4626766 | Normal |
| GSM4626766_TGATTTCAAGTGTCCCG-1  | GSM4626766 | Normal |
| GSM4626766_TGATTTCCAAGTGTCCCG-1 | GSM4626766 | Normal |
| GSM4626766_TGATTTCCACGGTTTA-1   | GSM4626766 | Normal |
| GSM4626766_TGATTTCCATGCAACT-1   | GSM4626766 | Normal |
| GSM4626766_TGATTTCTGACCGGCT-1   | GSM4626766 | Normal |
| GSM4626766_TGATTTCTGTCAATC-1    | GSM4626766 | Normal |
| GSM4626766_TGATTTCTGTTAAGACA-1  | GSM4626766 | Normal |
| GSM4626766_TGATTTCTCTACAGA-1    | GSM4626766 | Normal |
| GSM4626766_TGATTTCTCTGTTGAG-1   | GSM4626766 | Normal |
| GSM4626766_TGCACCTAGGCCCTTG-1   | GSM4626766 | Normal |
| GSM4626766_TGCACCTCAGTGGAGT-1   | GSM4626766 | Normal |
| GSM4626766_TGCACCTGTATAGGGC-1   | GSM4626766 | Normal |
| GSM4626766_TGCACCTGTCTTGATG-1   | GSM4626766 | Normal |
| GSM4626766_TGCACCTTCAACACAC-1   | GSM4626766 | Normal |
| GSM4626766_TGCACCTTCATGTCTT-1   | GSM4626766 | Normal |
| GSM4626766_TGCACCTTCTGTGCAA-1   | GSM4626766 | Normal |
| GSM4626766_TGCCAAAAGCAGGCTA-1   | GSM4626766 | Normal |
| GSM4626766_TGCCAAAAGCGGCTTC-1   | GSM4626766 | Normal |
| GSM4626766_TGCCAAAAGCTACCGC-1   | GSM4626766 | Normal |
| GSM4626766_TGCCAAAAGTGGGTTG-1   | GSM4626766 | Normal |
| GSM4626766_TGCCAAACAGACAAGC-1   | GSM4626766 | Normal |
| GSM4626766_TGCCAAACATAGGATA-1   | GSM4626766 | Normal |
| GSM4626766_TGCCAAAGTAAGTAGT-1   | GSM4626766 | Normal |
| GSM4626766_TGCCAAAGTCTACCTC-1   | GSM4626766 | Normal |
| GSM4626766_TGCCAAAGTGTGCGTC-1   | GSM4626766 | Normal |
| GSM4626766_TGCCAAATCACTGGGC-1   | GSM4626766 | Normal |
| GSM4626766_TGCCAAATCTCGTTTA-1   | GSM4626766 | Normal |
| GSM4626766_TGCCCATAGACTTTTCG-1  | GSM4626766 | Normal |
| GSM4626766_TGCCCATAGCAAATCA-1   | GSM4626766 | Normal |
| GSM4626766_TGCCCATAGGGCTTGA-1   | GSM4626766 | Normal |
| GSM4626766_TGCCCATAGTTGTCGT-1   | GSM4626766 | Normal |
| GSM4626766_TGCCCATCAGAGCCAA-1   | GSM4626766 | Normal |
| GSM4626766_TGCCCATCATCGGAAG-1   | GSM4626766 | Normal |
| GSM4626766_TGCCCATGTTCCATGA-1   | GSM4626766 | Normal |
| GSM4626766_TGCCCATTCAACACTG-1   | GSM4626766 | Normal |
| GSM4626766_TGCCCATTCAAGAAGT-1   | GSM4626766 | Normal |
| GSM4626766_TGCCCATTCACTGGGC-1   | GSM4626766 | Normal |
| GSM4626766_TGCCCTAAGAAACCAT-1   | GSM4626766 | Normal |
| GSM4626766_TGCCCTAAGATGAGAG-1   | GSM4626766 | Normal |
| GSM4626766_TGCCCTAAGCTCTCGG-1   | GSM4626766 | Normal |
| GSM4626766_TGCCCTAAGTCCAGGA-1   | GSM4626766 | Normal |
| GSM4626766_TGCCCTAAGTGAACGC-1   | GSM4626766 | Normal |
| GSM4626766_TGCCCTAAGTGGGATC-1   | GSM4626766 | Normal |
| GSM4626766_TGCCCTACAATCCAAC-1   | GSM4626766 | Normal |
| GSM4626766_TGCCCTACACCCATTC-1   | GSM4626766 | Normal |
| GSM4626766_TGCCCTACAGATGAGC-1   | GSM4626766 | Normal |
| GSM4626766_TGCCCTACAGGTCCAC-1   | GSM4626766 | Normal |
| GSM4626766_TGCCCTAGTAAACCTC-1   | GSM4626766 | Normal |
| GSM4626766_TGCCCTAGTTGGTTTG-1   | GSM4626766 | Normal |
| GSM4626766_TGCCCTATCCACGACG-1   | GSM4626766 | Normal |
| GSM4626766_TGCCCTATCGTTACAG-1   | GSM4626766 | Normal |

|                                |            |        |
|--------------------------------|------------|--------|
| GSM4626766_TGCCCTATCTGATTCT-1  | GSM4626766 | Normal |
| GSM4626766_TGCGCAGAGAGTCGGT-1  | GSM4626766 | Normal |
| GSM4626766_TGCGCAGCAACCGCCA-1  | GSM4626766 | Normal |
| GSM4626766_TGCGCAGCACGGCCAT-1  | GSM4626766 | Normal |
| GSM4626766_TGCGCAGCACGGTAAG-1  | GSM4626766 | Normal |
| GSM4626766_TGCGCAGCATGGAATA-1  | GSM4626766 | Normal |
| GSM4626766_TGCGCAGGTACCGGCT-1  | GSM4626766 | Normal |
| GSM4626766_TGCGCAGGTACCGTAT-1  | GSM4626766 | Normal |
| GSM4626766_TGCGCAGGTACGAAAT-1  | GSM4626766 | Normal |
| GSM4626766_TGCGCAGGTGCAGGTA-1  | GSM4626766 | Normal |
| GSM4626766_TGCGCAGGTTACAGAA-1  | GSM4626766 | Normal |
| GSM4626766_TGCGCAGTCAAACCGT-1  | GSM4626766 | Normal |
| GSM4626766_TGCGCAGTCACATAGC-1  | GSM4626766 | Normal |
| GSM4626766_TGCGCAGTCCTTTACA-1  | GSM4626766 | Normal |
| GSM4626766_TGCGCAGTCGAGAACG-1  | GSM4626766 | Normal |
| GSM4626766_TGCGCAGTCGCATGGC-1  | GSM4626766 | Normal |
| GSM4626766_TGCGCAGTCTAGAGTC-1  | GSM4626766 | Normal |
| GSM4626766_TGCGGGTAGAACAAC-1   | GSM4626766 | Normal |
| GSM4626766_TGCGGGTAGACACTAA-1  | GSM4626766 | Normal |
| GSM4626766_TGCGGGTAGCAACGGT-1  | GSM4626766 | Normal |
| GSM4626766_TGCGGGTAGGAGTACC-1  | GSM4626766 | Normal |
| GSM4626766_TGCGGGTAGTGGAGAA-1  | GSM4626766 | Normal |
| GSM4626766_TGCGGGTAGTTGCAGG-1  | GSM4626766 | Normal |
| GSM4626766_TGCGGGTCAATGACCT-1  | GSM4626766 | Normal |
| GSM4626766_TGCGGGTCATTCTTAC-1  | GSM4626766 | Normal |
| GSM4626766_TGCGGGTCATTGGTAC-1  | GSM4626766 | Normal |
| GSM4626766_TGCGGGTGACCTACA-1   | GSM4626766 | Normal |
| GSM4626766_TGCGGGTGCCAGTAT-1   | GSM4626766 | Normal |
| GSM4626766_TGCGGGTGTTGGGACA-1  | GSM4626766 | Normal |
| GSM4626766_TGCGGGTTCAGTCAGT-1  | GSM4626766 | Normal |
| GSM4626766_TGCGGGTTCGCGGATC-1  | GSM4626766 | Normal |
| GSM4626766_TGCGGGTCTGCAGTA-1   | GSM4626766 | Normal |
| GSM4626766_TGCGTGAGACACGAC-1   | GSM4626766 | Normal |
| GSM4626766_TGCGTGAGATATGCA-1   | GSM4626766 | Normal |
| GSM4626766_TGCGTGAGCAAATCA-1   | GSM4626766 | Normal |
| GSM4626766_TGCGTGAGCTATGCT-1   | GSM4626766 | Normal |
| GSM4626766_TGCGTGAGTAGGTGC-1   | GSM4626766 | Normal |
| GSM4626766_TGCGTGAGTGCCATT-1   | GSM4626766 | Normal |
| GSM4626766_TGCGTGGCACGACGAA-1  | GSM4626766 | Normal |
| GSM4626766_TGCGTGGCATGTAAGA-1  | GSM4626766 | Normal |
| GSM4626766_TGCGTGGGTAAATGTG-1  | GSM4626766 | Normal |
| GSM4626766_TGCGTGGGTCTAGTGT-1  | GSM4626766 | Normal |
| GSM4626766_TGCGTGGGTGACGGTA-1  | GSM4626766 | Normal |
| GSM4626766_TGCTACCAGGCACATG-1  | GSM4626766 | Normal |
| GSM4626766_TGCTACCAGTAGGCCA-1  | GSM4626766 | Normal |
| GSM4626766_TGCTACCAGTCTCGGC-1  | GSM4626766 | Normal |
| GSM4626766_TGCTACCCAACCTGCGC-1 | GSM4626766 | Normal |
| GSM4626766_TGCTACCCACCCATTC-1  | GSM4626766 | Normal |
| GSM4626766_TGCTACCCACGGTGTC-1  | GSM4626766 | Normal |
| GSM4626766_TGCTACCGTCACTTCC-1  | GSM4626766 | Normal |
| GSM4626766_TGCTACCGTTCGGCACT-1 | GSM4626766 | Normal |
| GSM4626766_TGCTACCGTTCGGGTCT-1 | GSM4626766 | Normal |
| GSM4626766_TGCTACCGTGCGCTTG-1  | GSM4626766 | Normal |
| GSM4626766_TGCTACCGTGGTCTCG-1  | GSM4626766 | Normal |
| GSM4626766_TGCTACCTCACATACG-1  | GSM4626766 | Normal |
| GSM4626766_TGCTACCTCGAGAACG-1  | GSM4626766 | Normal |
| GSM4626766_TGCTACCTCGTAGGTT-1  | GSM4626766 | Normal |

|                               |            |        |
|-------------------------------|------------|--------|
| GSM4626766_TGCTACCTCTACCAGA-1 | GSM4626766 | Normal |
| GSM4626766_TGCTACCTCTACCTGC-1 | GSM4626766 | Normal |
| GSM4626766_TGCTGCTAGAGTAATC-1 | GSM4626766 | Normal |
| GSM4626766_TGCTGCTAGCTGCGAA-1 | GSM4626766 | Normal |
| GSM4626766_TGCTGCTAGGCATTGG-1 | GSM4626766 | Normal |
| GSM4626766_TGCTGCTAGGGCTTCC-1 | GSM4626766 | Normal |
| GSM4626766_TGCTGCTAGTGTACGG-1 | GSM4626766 | Normal |
| GSM4626766_TGCTGCTAGTGTTTGC-1 | GSM4626766 | Normal |
| GSM4626766_TGCTGCTGTACTTCTT-1 | GSM4626766 | Normal |
| GSM4626766_TGCTGCTGTGCATCTA-1 | GSM4626766 | Normal |
| GSM4626766_TGCTGCTTCAACCAAC-1 | GSM4626766 | Normal |
| GSM4626766_TGCTGCTTCAACGGCC-1 | GSM4626766 | Normal |
| GSM4626766_TGCTGCTTCGAGAACG-1 | GSM4626766 | Normal |
| GSM4626766_TGCTGCTTCTTACCGC-1 | GSM4626766 | Normal |
| GSM4626766_TGGACGCAGACATAAC-1 | GSM4626766 | Normal |
| GSM4626766_TGGACGCAGCACACAG-1 | GSM4626766 | Normal |
| GSM4626766_TGGACGCAGCATCATC-1 | GSM4626766 | Normal |
| GSM4626766_TGGACGCAGCGATATA-1 | GSM4626766 | Normal |
| GSM4626766_TGGACGCAGCTAGTGG-1 | GSM4626766 | Normal |
| GSM4626766_TGGACGCAGGATATAC-1 | GSM4626766 | Normal |
| GSM4626766_TGGACGCGTAACGACG-1 | GSM4626766 | Normal |
| GSM4626766_TGGACGCGTCAGCTAT-1 | GSM4626766 | Normal |
| GSM4626766_TGGACGCGTCCGTCAG-1 | GSM4626766 | Normal |
| GSM4626766_TGGACGCGTCGCGGTT-1 | GSM4626766 | Normal |
| GSM4626766_TGGACGCGTGAAAGAG-1 | GSM4626766 | Normal |
| GSM4626766_TGGACGCGTGCGCTTG-1 | GSM4626766 | Normal |
| GSM4626766_TGGACGCGTGCTGTAT-1 | GSM4626766 | Normal |
| GSM4626766_TGGCCAGAGGCGCTCT-1 | GSM4626766 | Normal |
| GSM4626766_TGGCCAGAGTAGGTGC-1 | GSM4626766 | Normal |
| GSM4626766_TGGCCAGCAAATACAG-1 | GSM4626766 | Normal |
| GSM4626766_TGGCCAGCAAGCCATT-1 | GSM4626766 | Normal |
| GSM4626766_TGGCCAGCATAGAAAC-1 | GSM4626766 | Normal |
| GSM4626766_TGGCCAGCATGCAATC-1 | GSM4626766 | Normal |
| GSM4626766_TGGCCAGGTAGCGTAG-1 | GSM4626766 | Normal |
| GSM4626766_TGGCCAGGTTACCAGT-1 | GSM4626766 | Normal |
| GSM4626766_TGGCCAGTCACGGTTA-1 | GSM4626766 | Normal |
| GSM4626766_TGGCCAGTCACTGGGC-1 | GSM4626766 | Normal |
| GSM4626766_TGGCCAGTCATATCGG-1 | GSM4626766 | Normal |
| GSM4626766_TGGCCAGTCCTAAGTG-1 | GSM4626766 | Normal |
| GSM4626766_TGGCCAGTCTATCCCG-1 | GSM4626766 | Normal |
| GSM4626766_TGGCGCAAGATGTTAG-1 | GSM4626766 | Normal |
| GSM4626766_TGGCGCAAGGTAGCCA-1 | GSM4626766 | Normal |
| GSM4626766_TGGCGCAAGGTGTTAA-1 | GSM4626766 | Normal |
| GSM4626766_TGGCGCAAGTACTTGC-1 | GSM4626766 | Normal |
| GSM4626766_TGGCGCAAGTGGACGT-1 | GSM4626766 | Normal |
| GSM4626766_TGGCGCAAGTTCGATC-1 | GSM4626766 | Normal |
| GSM4626766_TGGCGCACAGCTGCAC-1 | GSM4626766 | Normal |
| GSM4626766_TGGCGCAGTACTCAAC-1 | GSM4626766 | Normal |
| GSM4626766_TGGCGCAGTAGCAAAT-1 | GSM4626766 | Normal |
| GSM4626766_TGGCGCAGTATGGTTC-1 | GSM4626766 | Normal |
| GSM4626766_TGGCGCAGTCTTGATG-1 | GSM4626766 | Normal |
| GSM4626766_TGGCGCAGTGAGGGTT-1 | GSM4626766 | Normal |
| GSM4626766_TGGCGCATCAACGAAA-1 | GSM4626766 | Normal |
| GSM4626766_TGGCGCATCCTAGGGC-1 | GSM4626766 | Normal |
| GSM4626766_TGGCGCATCGAGCCCA-1 | GSM4626766 | Normal |
| GSM4626766_TGGCGCATCGCCATAA-1 | GSM4626766 | Normal |
| GSM4626766_TGGCGCATCTGCGCA-1  | GSM4626766 | Normal |

|                                |            |        |
|--------------------------------|------------|--------|
| GSM4626766_TGGCTGGAGAGGGATA-1  | GSM4626766 | Normal |
| GSM4626766_TGGCTGGAGCGACGTA-1  | GSM4626766 | Normal |
| GSM4626766_TGGCTGGAGTGCCATT-1  | GSM4626766 | Normal |
| GSM4626766_TGGCTGGCACATAACC-1  | GSM4626766 | Normal |
| GSM4626766_TGGCTGGGTCAATACC-1  | GSM4626766 | Normal |
| GSM4626766_TGGCTGGGTCCAGTGC-1  | GSM4626766 | Normal |
| GSM4626766_TGGCTGGGTCTAGTCA-1  | GSM4626766 | Normal |
| GSM4626766_TGGCTGGGTGCCTGCA-1  | GSM4626766 | Normal |
| GSM4626766_TGGCTGGGTGTAAGTA-1  | GSM4626766 | Normal |
| GSM4626766_TGGCTGGGTTACGCGC-1  | GSM4626766 | Normal |
| GSM4626766_TGGCTGGTCCAGTATG-1  | GSM4626766 | Normal |
| GSM4626766_TGGCTGGTCCGTTGCT-1  | GSM4626766 | Normal |
| GSM4626766_TGGCTGGTCTCGGACG-1  | GSM4626766 | Normal |
| GSM4626766_TGGCTGGTCTGCTGCT-1  | GSM4626766 | Normal |
| GSM4626766_TGGCTGGTCTTGGGTA-1  | GSM4626766 | Normal |
| GSM4626766_TGGGAAGAGGGAGTAA-1  | GSM4626766 | Normal |
| GSM4626766_TGGGAAGAGTAACCCT-1  | GSM4626766 | Normal |
| GSM4626766_TGGGAAGCAAGTCTGT-1  | GSM4626766 | Normal |
| GSM4626766_TGGGAAGCAATCACAC-1  | GSM4626766 | Normal |
| GSM4626766_TGGGAAGCACATCTTT-1  | GSM4626766 | Normal |
| GSM4626766_TGGGAAGGTACACCGC-1  | GSM4626766 | Normal |
| GSM4626766_TGGGAAGGTTCGCATCG-1 | GSM4626766 | Normal |
| GSM4626766_TGGGAAGGTTCGGCTCA-1 | GSM4626766 | Normal |
| GSM4626766_TGGGAAGGTCTCCATC-1  | GSM4626766 | Normal |
| GSM4626766_TGGGAAGGTTAAGAAC-1  | GSM4626766 | Normal |
| GSM4626766_TGGGAAGGTTGTACAC-1  | GSM4626766 | Normal |
| GSM4626766_TGGGAAGTCAACGAAA-1  | GSM4626766 | Normal |
| GSM4626766_TGGGAAGTCACGCGGT-1  | GSM4626766 | Normal |
| GSM4626766_TGGGAAGTCATGCTCC-1  | GSM4626766 | Normal |
| GSM4626766_TGGGAAGTCGCCTGAG-1  | GSM4626766 | Normal |
| GSM4626766_TGGGAAGTCTGCAGTA-1  | GSM4626766 | Normal |
| GSM4626766_TGGGCGTAGATCCCGC-1  | GSM4626766 | Normal |
| GSM4626766_TGGGCGTAGGAATTAC-1  | GSM4626766 | Normal |
| GSM4626766_TGGGCGTAGGTGATAT-1  | GSM4626766 | Normal |
| GSM4626766_TGGGCGTAGTCTTGCA-1  | GSM4626766 | Normal |
| GSM4626766_TGGGCGTCAATGGATA-1  | GSM4626766 | Normal |
| GSM4626766_TGGGCGTCACAAGACG-1  | GSM4626766 | Normal |
| GSM4626766_TGGGCGTGCTCTCTG-1   | GSM4626766 | Normal |
| GSM4626766_TGGGCGTGCTGATCA-1   | GSM4626766 | Normal |
| GSM4626766_TGGGCGTTCAGCATGT-1  | GSM4626766 | Normal |
| GSM4626766_TGGGCGTTCCTACTGGG-1 | GSM4626766 | Normal |
| GSM4626766_TGGGCGTTCGGTTCGG-1  | GSM4626766 | Normal |
| GSM4626766_TGGTTAGAGATAGCAT-1  | GSM4626766 | Normal |
| GSM4626766_TGGTTAGAGGGTTTCT-1  | GSM4626766 | Normal |
| GSM4626766_TGGTTAGCACCTCGTT-1  | GSM4626766 | Normal |
| GSM4626766_TGGTTAGCACGTTTA-1   | GSM4626766 | Normal |
| GSM4626766_TGGTTAGCATCAGTCA-1  | GSM4626766 | Normal |
| GSM4626766_TGGTTAGGTCACCTAA-1  | GSM4626766 | Normal |
| GSM4626766_TGGTTAGTCAACGGGA-1  | GSM4626766 | Normal |
| GSM4626766_TGGTTAGTCAGAGCTT-1  | GSM4626766 | Normal |
| GSM4626766_TGGTTAGTCAGGCCCA-1  | GSM4626766 | Normal |
| GSM4626766_TGGTTAGTCCTTTCTC-1  | GSM4626766 | Normal |
| GSM4626766_TGGTTCCAGGACAGAA-1  | GSM4626766 | Normal |
| GSM4626766_TGGTTCCAGGCCCTCA-1  | GSM4626766 | Normal |
| GSM4626766_TGGTTCCCCTTCGAA-1   | GSM4626766 | Normal |
| GSM4626766_TGGTTCCCATCGGAAG-1  | GSM4626766 | Normal |
| GSM4626766_TGGTTCCGTAGCAAAT-1  | GSM4626766 | Normal |

|                                |            |        |
|--------------------------------|------------|--------|
| GSM4626766_TGGTTCCTGCAACTT-1   | GSM4626766 | Normal |
| GSM4626766_TGGTTCCTCCTTCAAT-1  | GSM4626766 | Normal |
| GSM4626766_TGGTTCCTCGTCCGTT-1  | GSM4626766 | Normal |
| GSM4626766_TGGTTCCTCGTTTATC-1  | GSM4626766 | Normal |
| GSM4626766_TGGTTCCTCTGGAGCC-1  | GSM4626766 | Normal |
| GSM4626766_TGTATTCAGAAGGTTT-1  | GSM4626766 | Normal |
| GSM4626766_TGTATTCAGAGTAATC-1  | GSM4626766 | Normal |
| GSM4626766_TGTATTCGTCCATCCT-1  | GSM4626766 | Normal |
| GSM4626766_TGTATTCAGAGCTT-1    | GSM4626766 | Normal |
| GSM4626766_TGTATTCAGTGTTG-1    | GSM4626766 | Normal |
| GSM4626766_TGTCCCAAGAATGTTG-1  | GSM4626766 | Normal |
| GSM4626766_TGTCCCAAGAGGGATA-1  | GSM4626766 | Normal |
| GSM4626766_TGTCCCAAGAGGTAGA-1  | GSM4626766 | Normal |
| GSM4626766_TGTCCCAAGTACCGGA-1  | GSM4626766 | Normal |
| GSM4626766_TGTCCCAAGTCAATAG-1  | GSM4626766 | Normal |
| GSM4626766_TGTCCCAAGTCCAGGA-1  | GSM4626766 | Normal |
| GSM4626766_TGTCCCAAGTCAA-1     | GSM4626766 | Normal |
| GSM4626766_TGTCCCACACCTATCC-1  | GSM4626766 | Normal |
| GSM4626766_TGTCCCACACGCCAGT-1  | GSM4626766 | Normal |
| GSM4626766_TGTCCCACAGACAAAT-1  | GSM4626766 | Normal |
| GSM4626766_TGTCCCACAGCTGGCT-1  | GSM4626766 | Normal |
| GSM4626766_TGTCCCACATGCTAGT-1  | GSM4626766 | Normal |
| GSM4626766_TGTCCCACATTCTGC-1   | GSM4626766 | Normal |
| GSM4626766_TGTCCCAGTAAGAGGA-1  | GSM4626766 | Normal |
| GSM4626766_TGTCCCAGTTGGTTTG-1  | GSM4626766 | Normal |
| GSM4626766_TGTCCCAGTTGTGGCC-1  | GSM4626766 | Normal |
| GSM4626766_TGTCCCATCCTTGCTC-1  | GSM4626766 | Normal |
| GSM4626766_TGTCCCATCTCAAACG-1  | GSM4626766 | Normal |
| GSM4626766_TGTGGTAAGACTCGGA-1  | GSM4626766 | Normal |
| GSM4626766_TGTGGTAAGTCGAGTG-1  | GSM4626766 | Normal |
| GSM4626766_TGTGGTACAAGGACTG-1  | GSM4626766 | Normal |
| GSM4626766_TGTGGTACACCAGGTC-1  | GSM4626766 | Normal |
| GSM4626766_TGTGGTACACGAGAGT-1  | GSM4626766 | Normal |
| GSM4626766_TGTGGTACATCGGACC-1  | GSM4626766 | Normal |
| GSM4626766_TGTGGTAGTGACGGTA-1  | GSM4626766 | Normal |
| GSM4626766_TGTGGTAGTGACGAT-1   | GSM4626766 | Normal |
| GSM4626766_TGTGGTATCAACTCTT-1  | GSM4626766 | Normal |
| GSM4626766_TGTGGTATCCGCAAGC-1  | GSM4626766 | Normal |
| GSM4626766_TGTGGTATCCGCGGTA-1  | GSM4626766 | Normal |
| GSM4626766_TGTGGTATCGTGACAT-1  | GSM4626766 | Normal |
| GSM4626766_TGTGGTATCTAAGCCA-1  | GSM4626766 | Normal |
| GSM4626766_TGTGGTATCTGTACGA-1  | GSM4626766 | Normal |
| GSM4626766_TGTGTTTGTAAATTGGA-1 | GSM4626766 | Normal |
| GSM4626766_TGTGTTTGTCCGAATT-1  | GSM4626766 | Normal |
| GSM4626766_TGTGTTTGTTCGAGATG-1 | GSM4626766 | Normal |
| GSM4626766_TGTGTTTTCACTTCAT-1  | GSM4626766 | Normal |
| GSM4626766_TGTGTTTTCATGGTCA-1  | GSM4626766 | Normal |
| GSM4626766_TGTGTTTTCGGCGCTA-1  | GSM4626766 | Normal |
| GSM4626766_TGTTCCGAGAAGATTC-1  | GSM4626766 | Normal |
| GSM4626766_TGTTCCGAGCGATCCC-1  | GSM4626766 | Normal |
| GSM4626766_TGTTCCGAGTCAAGCG-1  | GSM4626766 | Normal |
| GSM4626766_TGTTCCGAGTGCGATG-1  | GSM4626766 | Normal |
| GSM4626766_TGTTCCGCACGACAAA-1  | GSM4626766 | Normal |
| GSM4626766_TGTTCCGCATCACGTA-1  | GSM4626766 | Normal |
| GSM4626766_TGTTCCGGTTGGTGGA-1  | GSM4626766 | Normal |
| GSM4626766_TGTTCCGTCAGAGACG-1  | GSM4626766 | Normal |
| GSM4626766_TGTTCCGTCACGCAG-1   | GSM4626766 | Normal |

|                                |            |        |
|--------------------------------|------------|--------|
| GSM4626766_TGTTCCGTCCAGAAGG-1  | GSM4626766 | Normal |
| GSM4626766_TGTTCCGTCTACAGA-1   | GSM4626766 | Normal |
| GSM4626766_TTAACCTCAGACATAAC-1 | GSM4626766 | Normal |
| GSM4626766_TTAACCTCAGCATCATC-1 | GSM4626766 | Normal |
| GSM4626766_TTAACCTCAGCCCAATT-1 | GSM4626766 | Normal |
| GSM4626766_TTAACCTCAGTTGAGAT-1 | GSM4626766 | Normal |
| GSM4626766_TTAACCTCCAAGAAAGG-1 | GSM4626766 | Normal |
| GSM4626766_TTAACCTCCACTCAGGC-1 | GSM4626766 | Normal |
| GSM4626766_TTAACCTCGTAAGAGGA-1 | GSM4626766 | Normal |
| GSM4626766_TTAACCTCGTATAAACG-1 | GSM4626766 | Normal |
| GSM4626766_TTAACCTCGTATGCTTG-1 | GSM4626766 | Normal |
| GSM4626766_TTAACCTCGTCTCATCC-1 | GSM4626766 | Normal |
| GSM4626766_TTAACCTCGTGATGCC-1  | GSM4626766 | Normal |
| GSM4626766_TTAACCTCGTTCAACCA-1 | GSM4626766 | Normal |
| GSM4626766_TTAACCTCGTTTGACTG-1 | GSM4626766 | Normal |
| GSM4626766_TTAACCTCTCTTAGAGC-1 | GSM4626766 | Normal |
| GSM4626766_TTAGGACAGAAACCTA-1  | GSM4626766 | Normal |
| GSM4626766_TTAGGACAGCGGATCA-1  | GSM4626766 | Normal |
| GSM4626766_TTAGGACAGCGTGAGT-1  | GSM4626766 | Normal |
| GSM4626766_TTAGGACAGTCGTTTG-1  | GSM4626766 | Normal |
| GSM4626766_TTAGGACAGTGAACAT-1  | GSM4626766 | Normal |
| GSM4626766_TTAGGACAGTGGTCCC-1  | GSM4626766 | Normal |
| GSM4626766_TTAGGACCAACGATGG-1  | GSM4626766 | Normal |
| GSM4626766_TTAGGACCACAACCTGT-1 | GSM4626766 | Normal |
| GSM4626766_TTAGGACGTAGCCTAT-1  | GSM4626766 | Normal |
| GSM4626766_TTAGGACGTGACTAT-1   | GSM4626766 | Normal |
| GSM4626766_TTAGGACGTCTCAACA-1  | GSM4626766 | Normal |
| GSM4626766_TTAGGACGTGACTACT-1  | GSM4626766 | Normal |
| GSM4626766_TTAGGACGTGCAGTAG-1  | GSM4626766 | Normal |
| GSM4626766_TTAGGACGTTACTGAC-1  | GSM4626766 | Normal |
| GSM4626766_TTAGGACTCATCACCC-1  | GSM4626766 | Normal |
| GSM4626766_TTAGGACTCGTATCAG-1  | GSM4626766 | Normal |
| GSM4626766_TTAGGCAAGACCTAGG-1  | GSM4626766 | Normal |
| GSM4626766_TTAGGCAAGGGATGGG-1  | GSM4626766 | Normal |
| GSM4626766_TTAGGCAAGGTGGGTT-1  | GSM4626766 | Normal |
| GSM4626766_TTAGGCAAGTACGCC-1   | GSM4626766 | Normal |
| GSM4626766_TTAGGCAGTCAGAATA-1  | GSM4626766 | Normal |
| GSM4626766_TTAGGCAGTGCCTGCA-1  | GSM4626766 | Normal |
| GSM4626766_TTAGGCATCACAAACC-1  | GSM4626766 | Normal |
| GSM4626766_TTAGGCATCAGAGCTT-1  | GSM4626766 | Normal |
| GSM4626766_TTAGGCATCTAACTTC-1  | GSM4626766 | Normal |
| GSM4626766_TTAGTTCAGAAACGAG-1  | GSM4626766 | Normal |
| GSM4626766_TTAGTTCAGAGAACAG-1  | GSM4626766 | Normal |
| GSM4626766_TTAGTTCAGAGACGAA-1  | GSM4626766 | Normal |
| GSM4626766_TTAGTTCAGATGTCGG-1  | GSM4626766 | Normal |
| GSM4626766_TTAGTTCAGTCTCGGC-1  | GSM4626766 | Normal |
| GSM4626766_TTAGTTCAGCGTTTCG-1  | GSM4626766 | Normal |
| GSM4626766_TTAGTTCGTGGGTATG-1  | GSM4626766 | Normal |
| GSM4626766_TTAGTTCGTGTGCCTG-1  | GSM4626766 | Normal |
| GSM4626766_TTAGTTCGTTAAGAAC-1  | GSM4626766 | Normal |
| GSM4626766_TTAGTTCCTCAACGCC-1  | GSM4626766 | Normal |
| GSM4626766_TTAGTTCCTCATGTAGC-1 | GSM4626766 | Normal |
| GSM4626766_TTAGTTCCTCGTTGACA-1 | GSM4626766 | Normal |
| GSM4626766_TTATGCTAGGGTATCG-1  | GSM4626766 | Normal |
| GSM4626766_TTATGCTAGTGTTGAA-1  | GSM4626766 | Normal |
| GSM4626766_TTATGCTCAAGACACG-1  | GSM4626766 | Normal |
| GSM4626766_TTATGCTGTAAATGTG-1  | GSM4626766 | Normal |

|                                |            |        |
|--------------------------------|------------|--------|
| GSM4626766_TTATGCTGTATGGTTC-1  | GSM4626766 | Normal |
| GSM4626766_TTATGCTGTCCATCCT-1  | GSM4626766 | Normal |
| GSM4626766_TTATGCTTCACGCGGT-1  | GSM4626766 | Normal |
| GSM4626766_TTATGCTTCGAGAACG-1  | GSM4626766 | Normal |
| GSM4626766_TTATGCTTCGCTTAGA-1  | GSM4626766 | Normal |
| GSM4626766_TTATGCTTCGTCCGTT-1  | GSM4626766 | Normal |
| GSM4626766_TTCCCAGAGACTACAA-1  | GSM4626766 | Normal |
| GSM4626766_TTCCCAGAGCACGCCT-1  | GSM4626766 | Normal |
| GSM4626766_TTCCCAGCAGAGCCAA-1  | GSM4626766 | Normal |
| GSM4626766_TTCCCAGGTTAAGATG-1  | GSM4626766 | Normal |
| GSM4626766_TTCCCAGGTTACGCGC-1  | GSM4626766 | Normal |
| GSM4626766_TTCCCAGTCTAACTGG-1  | GSM4626766 | Normal |
| GSM4626766_TTCCCAGTCTTAGCCC-1  | GSM4626766 | Normal |
| GSM4626766_TTCCAAGAGCAAATCA-1  | GSM4626766 | Normal |
| GSM4626766_TTCCAAGAGTGGCACA-1  | GSM4626766 | Normal |
| GSM4626766_TTCCAAGGTCTAGAGG-1  | GSM4626766 | Normal |
| GSM4626766_TTCCAAGGTTTAGCTG-1  | GSM4626766 | Normal |
| GSM4626766_TTCCAAGTCCGAGCCA-1  | GSM4626766 | Normal |
| GSM4626766_TTCCAAGTCCGTCAA-1   | GSM4626766 | Normal |
| GSM4626766_TTCCAAGTCCCTAGC-1   | GSM4626766 | Normal |
| GSM4626766_TTCCAAGTCTATCCTA-1  | GSM4626766 | Normal |
| GSM4626766_TTCCAAGTCTGTACGA-1  | GSM4626766 | Normal |
| GSM4626766_TTCCGTCAGTAGGCCA-1  | GSM4626766 | Normal |
| GSM4626766_TTCCGTCGAATGCCAT-1  | GSM4626766 | Normal |
| GSM4626766_TTCCGTCACAACGTT-1   | GSM4626766 | Normal |
| GSM4626766_TTCCGTCACGTCTCT-1   | GSM4626766 | Normal |
| GSM4626766_TTCCGTCATCACGAT-1   | GSM4626766 | Normal |
| GSM4626766_TTCCGTCGTACGCACC-1  | GSM4626766 | Normal |
| GSM4626766_TTCCGTCGTGACCAAG-1  | GSM4626766 | Normal |
| GSM4626766_TTCCGTCGTGATGCC-1   | GSM4626766 | Normal |
| GSM4626766_TTCCGTCCTCAGGTTCA-1 | GSM4626766 | Normal |
| GSM4626766_TTCCGTCCTCTGTGCG-1  | GSM4626766 | Normal |
| GSM4626766_TTCTACAAGAATGTGT-1  | GSM4626766 | Normal |
| GSM4626766_TTCTACAAGAGACTAT-1  | GSM4626766 | Normal |
| GSM4626766_TTCTACAAGATCCCAT-1  | GSM4626766 | Normal |
| GSM4626766_TTCTACAAGCGTTAT-1   | GSM4626766 | Normal |
| GSM4626766_TTCTACACACGGCTAC-1  | GSM4626766 | Normal |
| GSM4626766_TTCTACACAGGGCATA-1  | GSM4626766 | Normal |
| GSM4626766_TTCTACACATCCAACA-1  | GSM4626766 | Normal |
| GSM4626766_TTCTACACATTAACCG-1  | GSM4626766 | Normal |
| GSM4626766_TTCTACAGTAAACCTC-1  | GSM4626766 | Normal |
| GSM4626766_TTCTACAGTACCGAGA-1  | GSM4626766 | Normal |
| GSM4626766_TTCTACAGTCCGTCAG-1  | GSM4626766 | Normal |
| GSM4626766_TTCTACAGTCTTGCGG-1  | GSM4626766 | Normal |
| GSM4626766_TTCTACATCATATCGG-1  | GSM4626766 | Normal |
| GSM4626766_TTCTACATCATCTGCC-1  | GSM4626766 | Normal |
| GSM4626766_TTCTACATCCAACCAA-1  | GSM4626766 | Normal |
| GSM4626766_TTCTACATCCAGTAGT-1  | GSM4626766 | Normal |
| GSM4626766_TTCTACATCGTAGATC-1  | GSM4626766 | Normal |
| GSM4626766_TTCTACATCTTCCTTC-1  | GSM4626766 | Normal |
| GSM4626766_TTCTACATCTTGAGGT-1  | GSM4626766 | Normal |
| GSM4626766_TTCTCAAAGCTAGTCT-1  | GSM4626766 | Normal |
| GSM4626766_TTCTCAAAGGACAGCT-1  | GSM4626766 | Normal |
| GSM4626766_TTCTCAAAGGAGCGAG-1  | GSM4626766 | Normal |
| GSM4626766_TTCTCAACAATACGCT-1  | GSM4626766 | Normal |
| GSM4626766_TTCTCAACAGGACCCT-1  | GSM4626766 | Normal |
| GSM4626766_TTCTCAACATCTCGCT-1  | GSM4626766 | Normal |

|                               |            |        |
|-------------------------------|------------|--------|
| GSM4626766_TTCTCAACATGCAACT-1 | GSM4626766 | Normal |
| GSM4626766_TTCTCAAGTGCGCTTG-1 | GSM4626766 | Normal |
| GSM4626766_TTCTCAAGTTTGTGTG-1 | GSM4626766 | Normal |
| GSM4626766_TTCTCAATCACCAGGC-1 | GSM4626766 | Normal |
| GSM4626766_TTCTCAATCATCGCTC-1 | GSM4626766 | Normal |
| GSM4626766_TTCTCAATCCACGACG-1 | GSM4626766 | Normal |
| GSM4626766_TTCTCAATCTCTTGAT-1 | GSM4626766 | Normal |
| GSM4626766_TTCTCAATCTGACCTC-1 | GSM4626766 | Normal |
| GSM4626766_TTCTCAATCTTCGGTC-1 | GSM4626766 | Normal |
| GSM4626766_TTCTCCTAGACGACGT-1 | GSM4626766 | Normal |
| GSM4626766_TTCTCCTAGCCAGTTT-1 | GSM4626766 | Normal |
| GSM4626766_TTCTCCTAGCTGCAAG-1 | GSM4626766 | Normal |
| GSM4626766_TTCTCCTAGTGTCTCA-1 | GSM4626766 | Normal |
| GSM4626766_TTCTCCTCAACACCCG-1 | GSM4626766 | Normal |
| GSM4626766_TTCTCCTCAGTGACAG-1 | GSM4626766 | Normal |
| GSM4626766_TTCTCCTCATCACGTA-1 | GSM4626766 | Normal |
| GSM4626766_TTCTCCTGTACCTACA-1 | GSM4626766 | Normal |
| GSM4626766_TTCTCCTGTCCAGTGC-1 | GSM4626766 | Normal |
| GSM4626766_TTCTCCTGTGGTTTCA-1 | GSM4626766 | Normal |
| GSM4626766_TTCTCCTGTGTGGCTC-1 | GSM4626766 | Normal |
| GSM4626766_TTCTCCTTCAACCATG-1 | GSM4626766 | Normal |
| GSM4626766_TTCTCCTTCCCTCAGT-1 | GSM4626766 | Normal |
| GSM4626766_TTCTCCTTCTGCTGCT-1 | GSM4626766 | Normal |
| GSM4626766_TTCTCCTTCTGCTGTC-1 | GSM4626766 | Normal |
| GSM4626766_TTCTCCTTCTTACCGC-1 | GSM4626766 | Normal |
| GSM4626766_TTCTTAGAGGAGCGAG-1 | GSM4626766 | Normal |
| GSM4626766_TTCTTAGAGGTGCACA-1 | GSM4626766 | Normal |
| GSM4626766_TTCTTAGAGTCGATAA-1 | GSM4626766 | Normal |
| GSM4626766_TTCTTAGAGTGGAGAA-1 | GSM4626766 | Normal |
| GSM4626766_TTCTTAGCATCCGGGT-1 | GSM4626766 | Normal |
| GSM4626766_TTCTTAGGTCAGAGGT-1 | GSM4626766 | Normal |
| GSM4626766_TTCTTAGGTGTGTGCC-1 | GSM4626766 | Normal |
| GSM4626766_TTCTTAGGTTAGGGTG-1 | GSM4626766 | Normal |
| GSM4626766_TTCTTAGTCAAGAAGT-1 | GSM4626766 | Normal |
| GSM4626766_TTCTTAGTCACAAACC-1 | GSM4626766 | Normal |
| GSM4626766_TTCTTAGTCAGCATGT-1 | GSM4626766 | Normal |
| GSM4626766_TTCTTAGTCCATTCTA-1 | GSM4626766 | Normal |
| GSM4626766_TTCTTAGTCTACCAGA-1 | GSM4626766 | Normal |
| GSM4626766_TTCTTAGTCTCCCTGA-1 | GSM4626766 | Normal |
| GSM4626766_TTGAACGAGAAGCCCA-1 | GSM4626766 | Normal |
| GSM4626766_TTGAACGAGACAGACC-1 | GSM4626766 | Normal |
| GSM4626766_TTGAACGAGCCAGAAC-1 | GSM4626766 | Normal |
| GSM4626766_TTGAACGAGGAGTTGC-1 | GSM4626766 | Normal |
| GSM4626766_TTGAACGAGGTAAACT-1 | GSM4626766 | Normal |
| GSM4626766_TTGAACGCAACAACCT-1 | GSM4626766 | Normal |
| GSM4626766_TTGAACGCACGAAGCA-1 | GSM4626766 | Normal |
| GSM4626766_TTGAACGCAGCGAACA-1 | GSM4626766 | Normal |
| GSM4626766_TTGAACGGTCGCGGTT-1 | GSM4626766 | Normal |
| GSM4626766_TTGACTTAGCACACAG-1 | GSM4626766 | Normal |
| GSM4626766_TTGACTTAGCTATGCT-1 | GSM4626766 | Normal |
| GSM4626766_TTGACTTAGGTCATCT-1 | GSM4626766 | Normal |
| GSM4626766_TTGACTTAGTGGAGTC-1 | GSM4626766 | Normal |
| GSM4626766_TTGACTTAGTGTGAA-1  | GSM4626766 | Normal |
| GSM4626766_TTGACTTCAGATTGCT-1 | GSM4626766 | Normal |
| GSM4626766_TTGACTTCATAGAAAC-1 | GSM4626766 | Normal |
| GSM4626766_TTGACTTGTAATCGTC-1 | GSM4626766 | Normal |
| GSM4626766_TTGACTTGTCTGATTG-1 | GSM4626766 | Normal |



|                                |            |        |
|--------------------------------|------------|--------|
| GSM4626766_TTGACTTGTTCTCCA-1   | GSM4626766 | Normal |
| GSM4626766_TTGACTTTCCTCTAGC-1  | GSM4626766 | Normal |
| GSM4626766_TTGACTTTCTGCTTGC-1  | GSM4626766 | Normal |
| GSM4626766_TTGCCGTAGACTAGGC-1  | GSM4626766 | Normal |
| GSM4626766_TTGCCGTAGGTGTTAA-1  | GSM4626766 | Normal |
| GSM4626766_TTGCCGTAGTCAAGCG-1  | GSM4626766 | Normal |
| GSM4626766_TTGCCGTAGTCCGTAT-1  | GSM4626766 | Normal |
| GSM4626766_TTGCCGTCAAGTAATG-1  | GSM4626766 | Normal |
| GSM4626766_TTGCCGTTCATCGGACC-1 | GSM4626766 | Normal |
| GSM4626766_TTGCCGTGTATCGCAT-1  | GSM4626766 | Normal |
| GSM4626766_TTGCCGTGTTTGTGTG-1  | GSM4626766 | Normal |
| GSM4626766_TTGCCGTTCCAGAAGG-1  | GSM4626766 | Normal |
| GSM4626766_TTGCCGTTCTGCTTG-1   | GSM4626766 | Normal |
| GSM4626766_TTGCCGTTTCGACAGCC-1 | GSM4626766 | Normal |
| GSM4626766_TTGCCGTTTCGCCAAT-1  | GSM4626766 | Normal |
| GSM4626766_TTGCCGTTTCGAAACG-1  | GSM4626766 | Normal |
| GSM4626766_TTGCCGTTTCGTAGGTT-1 | GSM4626766 | Normal |
| GSM4626766_TTGCGTCAGACCGGAT-1  | GSM4626766 | Normal |
| GSM4626766_TTGCGTCAGGAGTTGC-1  | GSM4626766 | Normal |
| GSM4626766_TTGCGTCAGTCCATAC-1  | GSM4626766 | Normal |
| GSM4626766_TTGCGTCCAACCTGGCC-1 | GSM4626766 | Normal |
| GSM4626766_TTGCGTCCAAGAGTCG-1  | GSM4626766 | Normal |
| GSM4626766_TTGCGTCCACCACAG-1   | GSM4626766 | Normal |
| GSM4626766_TTGCGTCCACCGTTGG-1  | GSM4626766 | Normal |
| GSM4626766_TTGCGTCCACGACTCG-1  | GSM4626766 | Normal |
| GSM4626766_TTGCGTCCACGTGAGA-1  | GSM4626766 | Normal |
| GSM4626766_TTGCGTCCACTACAGT-1  | GSM4626766 | Normal |
| GSM4626766_TTGCGTCCAGCATACT-1  | GSM4626766 | Normal |
| GSM4626766_TTGCGTCGTAATAGCA-1  | GSM4626766 | Normal |
| GSM4626766_TTGCGTCGTCTCTTAT-1  | GSM4626766 | Normal |
| GSM4626766_TTGCGTCGTCTTTCAT-1  | GSM4626766 | Normal |
| GSM4626766_TTGCGTCGTTCTGTTT-1  | GSM4626766 | Normal |
| GSM4626766_TTGCGTCGTTGGACA-1   | GSM4626766 | Normal |
| GSM4626766_TTGCGTCGTTTGTTC-1   | GSM4626766 | Normal |
| GSM4626766_TTGCGTCTCACCCGAG-1  | GSM4626766 | Normal |
| GSM4626766_TTGCGTCTCACCGGGT-1  | GSM4626766 | Normal |
| GSM4626766_TTGCGTCTCGCGTAGC-1  | GSM4626766 | Normal |
| GSM4626766_TTGCGTCTCTCAAGTG-1  | GSM4626766 | Normal |
| GSM4626766_TTGCGTCTCTGGAGCC-1  | GSM4626766 | Normal |
| GSM4626766_TTGGAACAGAGGTTGC-1  | GSM4626766 | Normal |
| GSM4626766_TTGGAACAGATTACCC-1  | GSM4626766 | Normal |
| GSM4626766_TTGGAACATTGGGCC-1   | GSM4626766 | Normal |
| GSM4626766_TTGGAACGTAAGTGCC-1  | GSM4626766 | Normal |
| GSM4626766_TTGGAACGTAATTCTT-1  | GSM4626766 | Normal |
| GSM4626766_TTGGAACGTCGTTGTA-1  | GSM4626766 | Normal |
| GSM4626766_TTGGAACGTTAGGGTG-1  | GSM4626766 | Normal |
| GSM4626766_TTGGAACTCCGCTGTT-1  | GSM4626766 | Normal |
| GSM4626766_TTGGAACTCCTATTCA-1  | GSM4626766 | Normal |
| GSM4626766_TTGGAACTCGCACTCT-1  | GSM4626766 | Normal |
| GSM4626766_TTGGAACTCGGATGGA-1  | GSM4626766 | Normal |
| GSM4626766_TTGCAAAGGCGACAT-1   | GSM4626766 | Normal |
| GSM4626766_TTGCAAAGGCTAGCA-1   | GSM4626766 | Normal |
| GSM4626766_TTGCAACAAGAGTCG-1   | GSM4626766 | Normal |
| GSM4626766_TTGCAACAAGGTTTC-1   | GSM4626766 | Normal |
| GSM4626766_TTGCAAGTATATGGA-1   | GSM4626766 | Normal |
| GSM4626766_TTGCAAGTACACGC-1    | GSM4626766 | Normal |
| GSM4626766_TTGCAATCAAAGACA-1   | GSM4626766 | Normal |

|                                |            |        |
|--------------------------------|------------|--------|
| GSM4626766_TTGCAATCCTACAGA-1   | GSM4626766 | Normal |
| GSM4626766_TTGTAGGAGACTCGGA-1  | GSM4626766 | Normal |
| GSM4626766_TTGTAGGAGATCTGCT-1  | GSM4626766 | Normal |
| GSM4626766_TTGTAGGAGCAACGGT-1  | GSM4626766 | Normal |
| GSM4626766_TTGTAGGAGGACACCA-1  | GSM4626766 | Normal |
| GSM4626766_TTGTAGGAGTCCAGGA-1  | GSM4626766 | Normal |
| GSM4626766_TTGTAGGCAAGCCAC-1   | GSM4626766 | Normal |
| GSM4626766_TTGTAGGCACAGT-1     | GSM4626766 | Normal |
| GSM4626766_TTGTAGGCAGAGCCAA-1  | GSM4626766 | Normal |
| GSM4626766_TTGTAGGCATGCTGGC-1  | GSM4626766 | Normal |
| GSM4626766_TTGTAGGGTTACCAGT-1  | GSM4626766 | Normal |
| GSM4626766_TTGTAGGTCACGACTA-1  | GSM4626766 | Normal |
| GSM4626766_TTGTAGGTCGGTGTGCG-1 | GSM4626766 | Normal |
| GSM4626766_TTTACTGAGATAGTCA-1  | GSM4626766 | Normal |
| GSM4626766_TTTACTGAGGTAGCCA-1  | GSM4626766 | Normal |
| GSM4626766_TTTACTGAGTGAAGAG-1  | GSM4626766 | Normal |
| GSM4626766_TTTACTGAGTGCCAGA-1  | GSM4626766 | Normal |
| GSM4626766_TTTACTGCAAAGCGGT-1  | GSM4626766 | Normal |
| GSM4626766_TTTACTGCAGTAGAGC-1  | GSM4626766 | Normal |
| GSM4626766_TTTACTGGTGAGCGAT-1  | GSM4626766 | Normal |
| GSM4626766_TTTACTGGTGCAGTAG-1  | GSM4626766 | Normal |
| GSM4626766_TTTACTGGTGCATCTA-1  | GSM4626766 | Normal |
| GSM4626766_TTTACTGTCATGCTCC-1  | GSM4626766 | Normal |
| GSM4626766_TTTACTGTGAGGTAG-1   | GSM4626766 | Normal |
| GSM4626766_TTTACTGTGCCGTGA-1   | GSM4626766 | Normal |
| GSM4626766_TTTACTGTCGTGACAT-1  | GSM4626766 | Normal |
| GSM4626766_TTTATGCAGAAGATTC-1  | GSM4626766 | Normal |
| GSM4626766_TTTATGCAGACCCACC-1  | GSM4626766 | Normal |
| GSM4626766_TTTATGCAGACGCAAC-1  | GSM4626766 | Normal |
| GSM4626766_TTTATGCAGCCCGAAA-1  | GSM4626766 | Normal |
| GSM4626766_TTTATGCAGCGTCTAT-1  | GSM4626766 | Normal |
| GSM4626766_TTTATGCAGCTAACAA-1  | GSM4626766 | Normal |
| GSM4626766_TTTATGCCAAAGAATC-1  | GSM4626766 | Normal |
| GSM4626766_TTTATGCCAACACGCC-1  | GSM4626766 | Normal |
| GSM4626766_TTTATGCCACACATGT-1  | GSM4626766 | Normal |
| GSM4626766_TTTATGCCAGATGAGC-1  | GSM4626766 | Normal |
| GSM4626766_TTTATGCCATGGAATA-1  | GSM4626766 | Normal |
| GSM4626766_TTTATGCGTAATTGGA-1  | GSM4626766 | Normal |
| GSM4626766_TTTATGCGTGACTCAT-1  | GSM4626766 | Normal |
| GSM4626766_TTTATGCGTTAAAGTG-1  | GSM4626766 | Normal |
| GSM4626766_TTTATGCTCAGCATGT-1  | GSM4626766 | Normal |
| GSM4626766_TTTATGCTCCCAGGTG-1  | GSM4626766 | Normal |
| GSM4626766_TTTATGCTCTCTTATG-1  | GSM4626766 | Normal |
| GSM4626766_TTTCCTCAGTACGACG-1  | GSM4626766 | Normal |
| GSM4626766_TTTCCTCCAGCTTAAC-1  | GSM4626766 | Normal |
| GSM4626766_TTTCCTCCATTACCTT-1  | GSM4626766 | Normal |
| GSM4626766_TTTCCTCGTTACCAGT-1  | GSM4626766 | Normal |
| GSM4626766_TTTCCTCTCCAAGTAC-1  | GSM4626766 | Normal |
| GSM4626766_TTTCCTCTCGCAAAC-1   | GSM4626766 | Normal |
| GSM4626766_TTTCCTCTCGGCGCTA-1  | GSM4626766 | Normal |
| GSM4626766_TTTCCTCTCTCAACTT-1  | GSM4626766 | Normal |
| GSM4626766_TTTCCTCTCTGCGTAA-1  | GSM4626766 | Normal |
| GSM4626766_TTTGCGCAGATAGCAT-1  | GSM4626766 | Normal |
| GSM4626766_TTTGCGCAGCTGATAA-1  | GSM4626766 | Normal |
| GSM4626766_TTTGCGCGTACAAGTA-1  | GSM4626766 | Normal |
| GSM4626766_TTTGCGCGTCCGATCG-1  | GSM4626766 | Normal |
| GSM4626766_TTTGCGCTCACATGCA-1  | GSM4626766 | Normal |

|                                |            |        |
|--------------------------------|------------|--------|
| GSM4626766_TTTGCGCTCACGAAGG-1  | GSM4626766 | Normal |
| GSM4626766_TTTGCGCTCATGTCCC-1  | GSM4626766 | Normal |
| GSM4626766_TTTGCGCTCCATTCTA-1  | GSM4626766 | Normal |
| GSM4626766_TTTGCGCTCCCGACTT-1  | GSM4626766 | Normal |
| GSM4626766_TTTGCGCTCTTTACGT-1  | GSM4626766 | Normal |
| GSM4626766_TTTGGTTAGGGCACTA-1  | GSM4626766 | Normal |
| GSM4626766_TTTGGTTCACAGGTTT-1  | GSM4626766 | Normal |
| GSM4626766_TTTGGTTCACGAGAGT-1  | GSM4626766 | Normal |
| GSM4626766_TTTGGTTCAGCAGTTT-1  | GSM4626766 | Normal |
| GSM4626766_TTTGGTTGTACAGACG-1  | GSM4626766 | Normal |
| GSM4626766_TTTGGTTGTACTTCTT-1  | GSM4626766 | Normal |
| GSM4626766_TTTGGTTGTACCCAG-1   | GSM4626766 | Normal |
| GSM4626766_TTTGGTTGTTACGTCA-1  | GSM4626766 | Normal |
| GSM4626766_TTTGGTTTTCAGTACGT-1 | GSM4626766 | Normal |
| GSM4626766_TTTGGTTTCCACGTTT-1  | GSM4626766 | Normal |
| GSM4626766_TTTGGTTTCTGCCAT-1   | GSM4626766 | Normal |
| GSM4626766_TTTGGTTTCTTACCGC-1  | GSM4626766 | Normal |
| GSM4626766_TTTGTCAAGAAACGCC-1  | GSM4626766 | Normal |
| GSM4626766_TTTGTCAAGACAATAC-1  | GSM4626766 | Normal |
| GSM4626766_TTTGTCACAAACCCAT-1  | GSM4626766 | Normal |
| GSM4626766_TTTGTCACAATTGCTG-1  | GSM4626766 | Normal |
| GSM4626766_TTTGTCACATCAGTAC-1  | GSM4626766 | Normal |
| GSM4626766_TTTGTCACATCGATGT-1  | GSM4626766 | Normal |
| GSM4626766_TTTGTCAGTCCCTACT-1  | GSM4626766 | Normal |
| GSM4626766_TTTGTCAGTCTCTCGT-1  | GSM4626766 | Normal |
| GSM4626766_TTTGTCAGTGTGTGCC-1  | GSM4626766 | Normal |
| GSM4626766_TTTGTCAGTGTTTCGAT-1 | GSM4626766 | Normal |
| GSM4626766_TTTGTCAGTTAGAACA-1  | GSM4626766 | Normal |
| GSM4626766_TTTGTCAGTTGATTGC-1  | GSM4626766 | Normal |
| GSM4626766_TTTGTCATCACCGTAA-1  | GSM4626766 | Normal |
| GSM4626766_TTTGTCATCCAAACAC-1  | GSM4626766 | Normal |
| GSM4626766_TTTGTCATCCATTCTA-1  | GSM4626766 | Normal |
| GSM4626766_TTTGTCATCGCCTGAG-1  | GSM4626766 | Normal |
| GSM4626766_TTTGTCATCTTGACGA-1  | GSM4626766 | Normal |
| GSM4626767_AAACCTGAGGATGGTC-1  | GSM4626767 | Normal |
| GSM4626767_AAACCTGCAATCACAC-1  | GSM4626767 | Normal |
| GSM4626767_AAACCTGGTAAACCTC-1  | GSM4626767 | Normal |
| GSM4626767_AAACCTGGTACAAGTA-1  | GSM4626767 | Normal |
| GSM4626767_AAACCTGGTGACGGTA-1  | GSM4626767 | Normal |
| GSM4626767_AAACCTGTCCTGCAGG-1  | GSM4626767 | Normal |
| GSM4626767_AAACGGGAGAACAAC-1   | GSM4626767 | Normal |
| GSM4626767_AAACGGGAGATGAGAG-1  | GSM4626767 | Normal |
| GSM4626767_AAACGGGCATCGGACC-1  | GSM4626767 | Normal |
| GSM4626767_AAACGGGGTACCGCTG-1  | GSM4626767 | Normal |
| GSM4626767_AAACGGGGTCTAGCCG-1  | GSM4626767 | Normal |
| GSM4626767_AAACGGGTCCGTCAAA-1  | GSM4626767 | Normal |
| GSM4626767_AAAGATGAGGCCGAAT-1  | GSM4626767 | Normal |
| GSM4626767_AAAGATGAGGTGATTA-1  | GSM4626767 | Normal |
| GSM4626767_AAAGATGAGTCCATAC-1  | GSM4626767 | Normal |
| GSM4626767_AAAGATGCAAACAACA-1  | GSM4626767 | Normal |
| GSM4626767_AAAGATGCATACTCTT-1  | GSM4626767 | Normal |
| GSM4626767_AAAGATGGTCTTGATG-1  | GSM4626767 | Normal |
| GSM4626767_AAAGATGGTGAGTATA-1  | GSM4626767 | Normal |
| GSM4626767_AAAGATGGTGTAATGA-1  | GSM4626767 | Normal |
| GSM4626767_AAAGATGGTGTTAAGA-1  | GSM4626767 | Normal |
| GSM4626767_AAAGATGTCCGTCAA-1   | GSM4626767 | Normal |
| GSM4626767_AAAGCAAAGACAGAGA-1  | GSM4626767 | Normal |

|                                |            |        |
|--------------------------------|------------|--------|
| GSM4626767_AAAGCAAAGATCCGAG-1  | GSM4626767 | Normal |
| GSM4626767_AAAGCAAAGGATTCGG-1  | GSM4626767 | Normal |
| GSM4626767_AAAGCAAAGGGTTTCT-1  | GSM4626767 | Normal |
| GSM4626767_AAAGCAACAAACTGCT-1  | GSM4626767 | Normal |
| GSM4626767_AAAGCAACATCTACGA-1  | GSM4626767 | Normal |
| GSM4626767_AAAGCAATCCGAATGT-1  | GSM4626767 | Normal |
| GSM4626767_AAAGTAGAGACAATAC-1  | GSM4626767 | Normal |
| GSM4626767_AAAGTAGAGAGACGAA-1  | GSM4626767 | Normal |
| GSM4626767_AAAGTAGAGGCGATAC-1  | GSM4626767 | Normal |
| GSM4626767_AAAGTAGAGTAGATGT-1  | GSM4626767 | Normal |
| GSM4626767_AAAGTAGCAGGTGGAT-1  | GSM4626767 | Normal |
| GSM4626767_AAAGTAGCATAACAGCT-1 | GSM4626767 | Normal |
| GSM4626767_AAAGTAGCATCGGAAG-1  | GSM4626767 | Normal |
| GSM4626767_AAAGTAGCATGTTCCC-1  | GSM4626767 | Normal |
| GSM4626767_AAAGTAGGTATGAATG-1  | GSM4626767 | Normal |
| GSM4626767_AAAGTAGGTCCTAGCG-1  | GSM4626767 | Normal |
| GSM4626767_AAAGTAGTCACATACG-1  | GSM4626767 | Normal |
| GSM4626767_AAAGTAGTCACATAGC-1  | GSM4626767 | Normal |
| GSM4626767_AAAGTAGTCGCGATCG-1  | GSM4626767 | Normal |
| GSM4626767_AAATGCCAGCCACCTG-1  | GSM4626767 | Normal |
| GSM4626767_AAATGCCAGCCTTGAT-1  | GSM4626767 | Normal |
| GSM4626767_AAATGCCAGGACAGCT-1  | GSM4626767 | Normal |
| GSM4626767_AAATGCCAGGTGATTA-1  | GSM4626767 | Normal |
| GSM4626767_AAATGCCAGTTAGGTA-1  | GSM4626767 | Normal |
| GSM4626767_AAATGCCCAAGTACCT-1  | GSM4626767 | Normal |
| GSM4626767_AAATGCCCAATACGCT-1  | GSM4626767 | Normal |
| GSM4626767_AAATGCCCACCTGGTG-1  | GSM4626767 | Normal |
| GSM4626767_AAATGCCTCCCTAACC-1  | GSM4626767 | Normal |
| GSM4626767_AAATGCCTCGAGGTAG-1  | GSM4626767 | Normal |
| GSM4626767_AACACGTAGCAGGTCA-1  | GSM4626767 | Normal |
| GSM4626767_AACACGTAGTGAAGAG-1  | GSM4626767 | Normal |
| GSM4626767_AACACGTACACACGTG-1  | GSM4626767 | Normal |
| GSM4626767_AACACGTATGCCCGA-1   | GSM4626767 | Normal |
| GSM4626767_AACACGTGTACCGCTG-1  | GSM4626767 | Normal |
| GSM4626767_AACACGTTCGAACTGT-1  | GSM4626767 | Normal |
| GSM4626767_AACCATGCAAGGTTTC-1  | GSM4626767 | Normal |
| GSM4626767_AACCATGGTGCGAAAC-1  | GSM4626767 | Normal |
| GSM4626767_AACCATGGTGCGATAG-1  | GSM4626767 | Normal |
| GSM4626767_AACCATGTCTTCGAGA-1  | GSM4626767 | Normal |
| GSM4626767_AACCGCGAGTTCGCGC-1  | GSM4626767 | Normal |
| GSM4626767_AACCGCGCAATGGATA-1  | GSM4626767 | Normal |
| GSM4626767_AACCGCGCACATCCAA-1  | GSM4626767 | Normal |
| GSM4626767_AACCGCGCAGGTGGAT-1  | GSM4626767 | Normal |
| GSM4626767_AACCGCGGTAATCACC-1  | GSM4626767 | Normal |
| GSM4626767_AACCGCGGTAGGGTAC-1  | GSM4626767 | Normal |
| GSM4626767_AACCGCGGTTACCTC-1   | GSM4626767 | Normal |
| GSM4626767_AACCGCGTCAAGGCTT-1  | GSM4626767 | Normal |
| GSM4626767_AACCGCGTCGCCCTTA-1  | GSM4626767 | Normal |
| GSM4626767_AACGTTGCAGATCGGA-1  | GSM4626767 | Normal |
| GSM4626767_AACGTTGGTAGCTGCC-1  | GSM4626767 | Normal |
| GSM4626767_AACGTTGGTCCAACTA-1  | GSM4626767 | Normal |
| GSM4626767_AACGTTGGTGCAGACA-1  | GSM4626767 | Normal |
| GSM4626767_AACGTTGTCTTGTCAT-1  | GSM4626767 | Normal |
| GSM4626767_AACTCAGAGCCAGTAG-1  | GSM4626767 | Normal |
| GSM4626767_AACTCAGGTATCAGTC-1  | GSM4626767 | Normal |
| GSM4626767_AACTCAGGTCCGAAGA-1  | GSM4626767 | Normal |

|                                |            |        |
|--------------------------------|------------|--------|
| GSM4626767_AACTCAGGTGAGCGAT-1  | GSM4626767 | Normal |
| GSM4626767_AACTCAGTCATTGCGA-1  | GSM4626767 | Normal |
| GSM4626767_AACTCAGTCCTAGTGA-1  | GSM4626767 | Normal |
| GSM4626767_AACTCAGTCTGTCTAT-1  | GSM4626767 | Normal |
| GSM4626767_AACTCCCAGCTAGGCA-1  | GSM4626767 | Normal |
| GSM4626767_AACTCCCTCAAGGCTT-1  | GSM4626767 | Normal |
| GSM4626767_AACTCTTAGACGCAAC-1  | GSM4626767 | Normal |
| GSM4626767_AACTCTTAGCGTCAAG-1  | GSM4626767 | Normal |
| GSM4626767_AACTCTTAGCTCCTCT-1  | GSM4626767 | Normal |
| GSM4626767_AACTCTTCAAACGTGG-1  | GSM4626767 | Normal |
| GSM4626767_AACTCTTCAACCAGCAC-1 | GSM4626767 | Normal |
| GSM4626767_AACTCTTCAAGTTGGC-1  | GSM4626767 | Normal |
| GSM4626767_AACTCTTCATGCCTTC-1  | GSM4626767 | Normal |
| GSM4626767_AACTCTTTCGCATGGC-1  | GSM4626767 | Normal |
| GSM4626767_AACTCTTTCTGTTTGT-1  | GSM4626767 | Normal |
| GSM4626767_AACTGGTAGAATGTGT-1  | GSM4626767 | Normal |
| GSM4626767_AACTGGTCACCATGTA-1  | GSM4626767 | Normal |
| GSM4626767_AACTGGTCACCTCGTT-1  | GSM4626767 | Normal |
| GSM4626767_AACTGGTCAGGGCATA-1  | GSM4626767 | Normal |
| GSM4626767_AACTGGTCATAGGATA-1  | GSM4626767 | Normal |
| GSM4626767_AACTGGTCATCTCCCA-1  | GSM4626767 | Normal |
| GSM4626767_AACTGGTGTGAGATG-1   | GSM4626767 | Normal |
| GSM4626767_AACTTTCCAACAACCT-1  | GSM4626767 | Normal |
| GSM4626767_AACTTTCTGAAATCA-1   | GSM4626767 | Normal |
| GSM4626767_AACTTTCTCAGTCAGT-1  | GSM4626767 | Normal |
| GSM4626767_AAGACCTAGAAACGCC-1  | GSM4626767 | Normal |
| GSM4626767_AAGACCTAGATAGCAT-1  | GSM4626767 | Normal |
| GSM4626767_AAGACCTCACCGATAT-1  | GSM4626767 | Normal |
| GSM4626767_AAGACCTCAGCGTAAG-1  | GSM4626767 | Normal |
| GSM4626767_AAGACCTGTAAATGTG-1  | GSM4626767 | Normal |
| GSM4626767_AAGACCTGTACCATCA-1  | GSM4626767 | Normal |
| GSM4626767_AAGACCTGTTCATGCCG-1 | GSM4626767 | Normal |
| GSM4626767_AAGACCTGTCTAGTCA-1  | GSM4626767 | Normal |
| GSM4626767_AAGCCGCAAGTGTCCAT-1 | GSM4626767 | Normal |
| GSM4626767_AAGCCGCAATAACGA-1   | GSM4626767 | Normal |
| GSM4626767_AAGCCGCTCATGCCG-1   | GSM4626767 | Normal |
| GSM4626767_AAGCCGCTCAACGGCC-1  | GSM4626767 | Normal |
| GSM4626767_AAGCCGCTCAGTGTTG-1  | GSM4626767 | Normal |
| GSM4626767_AAGGAGCAGAATTGTG-1  | GSM4626767 | Normal |
| GSM4626767_AAGGAGCAGAGCTATA-1  | GSM4626767 | Normal |
| GSM4626767_AAGGAGCAGCGTGTCC-1  | GSM4626767 | Normal |
| GSM4626767_AAGGAGCAGCTGCCCA-1  | GSM4626767 | Normal |
| GSM4626767_AAGGAGCAGCTTTGGT-1  | GSM4626767 | Normal |
| GSM4626767_AAGGAGCCAATCGAAA-1  | GSM4626767 | Normal |
| GSM4626767_AAGGAGCGTATCTGCA-1  | GSM4626767 | Normal |
| GSM4626767_AAGGAGCTCCTAGAAC-1  | GSM4626767 | Normal |
| GSM4626767_AAGGCAGAGATGGCGT-1  | GSM4626767 | Normal |
| GSM4626767_AAGGCAGAGGAACTGC-1  | GSM4626767 | Normal |
| GSM4626767_AAGGCAGCAAGCTGTT-1  | GSM4626767 | Normal |
| GSM4626767_AAGGCAGCATGTAGTC-1  | GSM4626767 | Normal |
| GSM4626767_AAGGCAGCATTAAACCG-1 | GSM4626767 | Normal |
| GSM4626767_AAGGCAGCATTGTGCA-1  | GSM4626767 | Normal |
| GSM4626767_AAGGCAGGTCGGGTCT-1  | GSM4626767 | Normal |
| GSM4626767_AAGGCAGGTTAAGATG-1  | GSM4626767 | Normal |
| GSM4626767_AAGGCAGTCCCAAGAT-1  | GSM4626767 | Normal |
| GSM4626767_AAGGTTCCAGCGTCCA-1  | GSM4626767 | Normal |
| GSM4626767_AAGTCTGAGTACGATA-1  | GSM4626767 | Normal |

|                                |            |        |
|--------------------------------|------------|--------|
| GSM4626767_AAGTCTGCAATAGCAA-1  | GSM4626767 | Normal |
| GSM4626767_AAGTCTGGTTAAGACA-1  | GSM4626767 | Normal |
| GSM4626767_AAGTCTGGTTCAACCA-1  | GSM4626767 | Normal |
| GSM4626767_AAGTCTGGTTGGAGGT-1  | GSM4626767 | Normal |
| GSM4626767_AAGTCTGTCAACACCA-1  | GSM4626767 | Normal |
| GSM4626767_AAGTCTGTCGGTCTAA-1  | GSM4626767 | Normal |
| GSM4626767_AAGTCTGTCTTGACGA-1  | GSM4626767 | Normal |
| GSM4626767_AATCCAGAGAAGGACA-1  | GSM4626767 | Normal |
| GSM4626767_AATCCAGAGGACAGAA-1  | GSM4626767 | Normal |
| GSM4626767_AATCCAGCAAGGTTTC-1  | GSM4626767 | Normal |
| GSM4626767_AATCCAGCACTTCTGC-1  | GSM4626767 | Normal |
| GSM4626767_AATCCAGCATGTAAGA-1  | GSM4626767 | Normal |
| GSM4626767_AATCCAGTCCCTCTTT-1  | GSM4626767 | Normal |
| GSM4626767_AATCCAGTCGGCGGTT-1  | GSM4626767 | Normal |
| GSM4626767_AATCGGTAGCGGCTTC-1  | GSM4626767 | Normal |
| GSM4626767_AATCGGTAGGCTAGAC-1  | GSM4626767 | Normal |
| GSM4626767_AATCGGTAGGTAGCCA-1  | GSM4626767 | Normal |
| GSM4626767_AATCGGTGTCATATGC-1  | GSM4626767 | Normal |
| GSM4626767_AATCGGTTCCATACGGT-1 | GSM4626767 | Normal |
| GSM4626767_AATCGGTTCTAGCACA-1  | GSM4626767 | Normal |
| GSM4626767_AATCGGTTCTGATTCT-1  | GSM4626767 | Normal |
| GSM4626767_ACACCAAAGATAGCAT-1  | GSM4626767 | Normal |
| GSM4626767_ACACCAAAGCTACCTA-1  | GSM4626767 | Normal |
| GSM4626767_ACACCAAAGGCATGGT-1  | GSM4626767 | Normal |
| GSM4626767_ACACCAACACGGCCAT-1  | GSM4626767 | Normal |
| GSM4626767_ACACCAACATCAGTCA-1  | GSM4626767 | Normal |
| GSM4626767_ACACCAACATGCATGT-1  | GSM4626767 | Normal |
| GSM4626767_ACACCAACATGCCTTC-1  | GSM4626767 | Normal |
| GSM4626767_ACACCAAGTACTCTCC-1  | GSM4626767 | Normal |
| GSM4626767_ACACCAAGTCAATGTC-1  | GSM4626767 | Normal |
| GSM4626767_ACACCAATCCGAGCCA-1  | GSM4626767 | Normal |
| GSM4626767_ACACCAATCTGTACGA-1  | GSM4626767 | Normal |
| GSM4626767_ACACCCTAGAGCCCAA-1  | GSM4626767 | Normal |
| GSM4626767_ACACCCTAGATGTGGC-1  | GSM4626767 | Normal |
| GSM4626767_ACACCCTAGGCCCTCA-1  | GSM4626767 | Normal |
| GSM4626767_ACACCCTAGGGAAACA-1  | GSM4626767 | Normal |
| GSM4626767_ACACCCTCAGGGATTG-1  | GSM4626767 | Normal |
| GSM4626767_ACACCCTCATTTGCTT-1  | GSM4626767 | Normal |
| GSM4626767_ACACCCTGTCAGGACA-1  | GSM4626767 | Normal |
| GSM4626767_ACACCCTTCGCAAAC-1   | GSM4626767 | Normal |
| GSM4626767_ACACCGGAGAGGGATA-1  | GSM4626767 | Normal |
| GSM4626767_ACACCGGAGCGATATA-1  | GSM4626767 | Normal |
| GSM4626767_ACACCGGAGTCTTGCA-1  | GSM4626767 | Normal |
| GSM4626767_ACACCGGAGTTGTCGT-1  | GSM4626767 | Normal |
| GSM4626767_ACACCGGCACAGCCCA-1  | GSM4626767 | Normal |
| GSM4626767_ACACCGGCACATCCAA-1  | GSM4626767 | Normal |
| GSM4626767_ACACCGGCAGGTCTCG-1  | GSM4626767 | Normal |
| GSM4626767_ACACCGGGTCAATGTC-1  | GSM4626767 | Normal |
| GSM4626767_ACACCGGGTTCAGACT-1  | GSM4626767 | Normal |
| GSM4626767_ACACCGGTCCACTCCA-1  | GSM4626767 | Normal |
| GSM4626767_ACACTGAAGCACCGCT-1  | GSM4626767 | Normal |
| GSM4626767_ACACTGAAGTAATCCC-1  | GSM4626767 | Normal |
| GSM4626767_ACACTGAAGTCTCGGC-1  | GSM4626767 | Normal |
| GSM4626767_ACACTGACAATAGCAA-1  | GSM4626767 | Normal |
| GSM4626767_ACACTGACAGGCTCAC-1  | GSM4626767 | Normal |
| GSM4626767_ACACTGAGTGACCAAG-1  | GSM4626767 | Normal |
| GSM4626767_ACACTGATCCCAACGG-1  | GSM4626767 | Normal |

|                                |            |        |
|--------------------------------|------------|--------|
| GSM4626767_ACACTGATCCGTTGCT-1  | GSM4626767 | Normal |
| GSM4626767_ACACTGATCTCTTATG-1  | GSM4626767 | Normal |
| GSM4626767_ACAGCCGAGGACGAAA-1  | GSM4626767 | Normal |
| GSM4626767_ACAGCCGAGTTAAGTG-1  | GSM4626767 | Normal |
| GSM4626767_ACAGCCGAGTTCGCGC-1  | GSM4626767 | Normal |
| GSM4626767_ACAGCCGCATACAGCT-1  | GSM4626767 | Normal |
| GSM4626767_ACAGCCGGTAGTAGTA-1  | GSM4626767 | Normal |
| GSM4626767_ACAGCCGTCAAGCCTA-1  | GSM4626767 | Normal |
| GSM4626767_ACAGCTAAGACTAGGC-1  | GSM4626767 | Normal |
| GSM4626767_ACAGCTACAAAGCGGT-1  | GSM4626767 | Normal |
| GSM4626767_ACAGCTACAATACGCT-1  | GSM4626767 | Normal |
| GSM4626767_ACAGCTACACATCTTT-1  | GSM4626767 | Normal |
| GSM4626767_ACAGCTACAGACGCCT-1  | GSM4626767 | Normal |
| GSM4626767_ACAGCTAGTCTAAAGA-1  | GSM4626767 | Normal |
| GSM4626767_ACAGCTAGTGTAATGA-1  | GSM4626767 | Normal |
| GSM4626767_ACAGCTATCATGGTCA-1  | GSM4626767 | Normal |
| GSM4626767_ACATACGAGTTACCCA-1  | GSM4626767 | Normal |
| GSM4626767_ACATACGCAGGAATCG-1  | GSM4626767 | Normal |
| GSM4626767_ACATACGCAGGCTCAC-1  | GSM4626767 | Normal |
| GSM4626767_ACATACGGTAGGACAC-1  | GSM4626767 | Normal |
| GSM4626767_ACATACGGTTAGAACA-1  | GSM4626767 | Normal |
| GSM4626767_ACATACGTGCGAGGCT-1  | GSM4626767 | Normal |
| GSM4626767_ACATCAGCAAATTGCC-1  | GSM4626767 | Normal |
| GSM4626767_ACATCAGCAGAAGCAC-1  | GSM4626767 | Normal |
| GSM4626767_ACATCAGCATCGGAAG-1  | GSM4626767 | Normal |
| GSM4626767_ACATCAGGTTACGGC-1   | GSM4626767 | Normal |
| GSM4626767_ACATCAGTCAGTACGT-1  | GSM4626767 | Normal |
| GSM4626767_ACATGGTAGGCACATG-1  | GSM4626767 | Normal |
| GSM4626767_ACATGGTCACGACGAA-1  | GSM4626767 | Normal |
| GSM4626767_ACATGGTGTGCTGTAT-1  | GSM4626767 | Normal |
| GSM4626767_ACATGGTTCAGAGGA-1   | GSM4626767 | Normal |
| GSM4626767_ACATGGTCTGTCAAG-1   | GSM4626767 | Normal |
| GSM4626767_ACCAGTAAGCAGGTCA-1  | GSM4626767 | Normal |
| GSM4626767_ACCAGTACACTGCG-1    | GSM4626767 | Normal |
| GSM4626767_ACCAGTACAGTAAGAT-1  | GSM4626767 | Normal |
| GSM4626767_ACCAGTAGTCCGAACC-1  | GSM4626767 | Normal |
| GSM4626767_ACCAGTAGTCCTAGCG-1  | GSM4626767 | Normal |
| GSM4626767_ACCAGTATCAATCTCT-1  | GSM4626767 | Normal |
| GSM4626767_ACCAGTATCATGCTCC-1  | GSM4626767 | Normal |
| GSM4626767_ACCAGTATCCTTGACC-1  | GSM4626767 | Normal |
| GSM4626767_ACCAGTATCGCCGTGA-1  | GSM4626767 | Normal |
| GSM4626767_ACCCACTAGCGTTCGG-1  | GSM4626767 | Normal |
| GSM4626767_ACCCACTAGCTCCTCT-1  | GSM4626767 | Normal |
| GSM4626767_ACCCACTAGTTAAGTG-1  | GSM4626767 | Normal |
| GSM4626767_ACCCACTCAACTGCTA-1  | GSM4626767 | Normal |
| GSM4626767_ACCCACTCAATTCCTT-1  | GSM4626767 | Normal |
| GSM4626767_ACCCACTGTAAGTGGC-1  | GSM4626767 | Normal |
| GSM4626767_ACCCACTGTAGAAAGG-1  | GSM4626767 | Normal |
| GSM4626767_ACCCACTGTAGCGTAG-1  | GSM4626767 | Normal |
| GSM4626767_ACCCACTGTATCACCA-1  | GSM4626767 | Normal |
| GSM4626767_ACCCACTTCGGATGTT-1  | GSM4626767 | Normal |
| GSM4626767_ACCGTAAAGACTGGGT-1  | GSM4626767 | Normal |
| GSM4626767_ACCGTAAAGCTGTCTA-1  | GSM4626767 | Normal |
| GSM4626767_ACCGTAAAGTTAACGA-1  | GSM4626767 | Normal |
| GSM4626767_ACCGTAAACCCAGTG-1   | GSM4626767 | Normal |
| GSM4626767_ACCGTAAACAGCTTCGG-1 | GSM4626767 | Normal |
| GSM4626767_ACCGTAAAGTACACCGC-1 | GSM4626767 | Normal |

|                               |            |        |
|-------------------------------|------------|--------|
| GSM4626767_ACCGTAAGTGACTION-1 | GSM4626767 | Normal |
| GSM4626767_ACCGTAATCGTAGGTT-1 | GSM4626767 | Normal |
| GSM4626767_ACCTTTAAGATCCCGC-1 | GSM4626767 | Normal |
| GSM4626767_ACCTTTAAGCTGCCCA-1 | GSM4626767 | Normal |
| GSM4626767_ACCTTTAAGGGATACC-1 | GSM4626767 | Normal |
| GSM4626767_ACCTTTACACAGTCGC-1 | GSM4626767 | Normal |
| GSM4626767_ACCTTTACATATACGC-1 | GSM4626767 | Normal |
| GSM4626767_ACCTTTAGTCCAGTTA-1 | GSM4626767 | Normal |
| GSM4626767_ACCTTTAGTCCGACGT-1 | GSM4626767 | Normal |
| GSM4626767_ACCTTTAGTGAGGGAG-1 | GSM4626767 | Normal |
| GSM4626767_ACCTTTAGTTACCGAT-1 | GSM4626767 | Normal |
| GSM4626767_ACCTTTATCAGTTCGA-1 | GSM4626767 | Normal |
| GSM4626767_ACCTTTATCCAAGAT-1  | GSM4626767 | Normal |
| GSM4626767_ACGAGCCAGCAGCGTA-1 | GSM4626767 | Normal |
| GSM4626767_ACGAGCCAGGGATGGG-1 | GSM4626767 | Normal |
| GSM4626767_ACGAGCCAGGGTATCG-1 | GSM4626767 | Normal |
| GSM4626767_ACGAGCCAGTAGATGT-1 | GSM4626767 | Normal |
| GSM4626767_ACGAGCCCAGTCAGAG-1 | GSM4626767 | Normal |
| GSM4626767_ACGAGCCGTAAACCTC-1 | GSM4626767 | Normal |
| GSM4626767_ACGAGCCGTAACACTC-1 | GSM4626767 | Normal |
| GSM4626767_ACGAGCCGTAACACTC-1 | GSM4626767 | Normal |
| GSM4626767_ACGAGCCGTTCTTCTT-1 | GSM4626767 | Normal |
| GSM4626767_ACGAGCCGTGTTTGGT-1 | GSM4626767 | Normal |
| GSM4626767_ACGAGCCGTTAGGGTG-1 | GSM4626767 | Normal |
| GSM4626767_ACGAGCCTCATCGCTC-1 | GSM4626767 | Normal |
| GSM4626767_ACGAGGAAGCGTTGCC-1 | GSM4626767 | Normal |
| GSM4626767_ACGAGGAAGCTATGCT-1 | GSM4626767 | Normal |
| GSM4626767_ACGAGGACAAAGCGGT-1 | GSM4626767 | Normal |
| GSM4626767_ACGAGGAGTAGAGCTG-1 | GSM4626767 | Normal |
| GSM4626767_ACGAGGAGTGCGCTTG-1 | GSM4626767 | Normal |
| GSM4626767_ACGAGGAGTTAGTGGG-1 | GSM4626767 | Normal |
| GSM4626767_ACGAGGATCAGTTTGG-1 | GSM4626767 | Normal |
| GSM4626767_ACGAGGATCGTGGGAA-1 | GSM4626767 | Normal |
| GSM4626767_ACGATACAGAAGCCCA-1 | GSM4626767 | Normal |
| GSM4626767_ACGATACAGATAGTCA-1 | GSM4626767 | Normal |
| GSM4626767_ACGATACAGATGTCGG-1 | GSM4626767 | Normal |
| GSM4626767_ACGATACAGTAATCCC-1 | GSM4626767 | Normal |
| GSM4626767_ACGATACAGTGTACGG-1 | GSM4626767 | Normal |
| GSM4626767_ACGATACCAATGAATG-1 | GSM4626767 | Normal |
| GSM4626767_ACGATACCAATGGATA-1 | GSM4626767 | Normal |
| GSM4626767_ACGATACCACGGCGTT-1 | GSM4626767 | Normal |
| GSM4626767_ACGATACTCCCAAGTA-1 | GSM4626767 | Normal |
| GSM4626767_ACGATACTCCGCTGTT-1 | GSM4626767 | Normal |
| GSM4626767_ACGATACTCGCTTGTC-1 | GSM4626767 | Normal |
| GSM4626767_ACGATACTCTTCAACT-1 | GSM4626767 | Normal |
| GSM4626767_ACGATGTGTGCAATCT-1 | GSM4626767 | Normal |
| GSM4626767_ACGATGTGTTCCACTC-1 | GSM4626767 | Normal |
| GSM4626767_ACGATGTGTTGGACCC-1 | GSM4626767 | Normal |
| GSM4626767_ACGATGTTCAACAGT-1  | GSM4626767 | Normal |
| GSM4626767_ACGATGTTCATGTGGT-1 | GSM4626767 | Normal |
| GSM4626767_ACGCAGCAGACTAAGT-1 | GSM4626767 | Normal |
| GSM4626767_ACGCAGCAGAGCTATA-1 | GSM4626767 | Normal |
| GSM4626767_ACGCAGCAGTTCGATC-1 | GSM4626767 | Normal |
| GSM4626767_ACGCAGCCACCACGTG-1 | GSM4626767 | Normal |
| GSM4626767_ACGCAGCGTAGAAAGG-1 | GSM4626767 | Normal |
| GSM4626767_ACGCAGCGTCAAAGAT-1 | GSM4626767 | Normal |
| GSM4626767_ACGCAGCTCGTGGTGC-1 | GSM4626767 | Normal |
| GSM4626767_ACGCAGCTCTGAGTGT-1 | GSM4626767 | Normal |



|                                 |            |        |
|---------------------------------|------------|--------|
| GSM4626767_ACGCCAGAGCGTAGTG-1   | GSM4626767 | Normal |
| GSM4626767_ACGCCAGAGGCGACAT-1   | GSM4626767 | Normal |
| GSM4626767_ACGCCAGCAAAGTCTGCT-1 | GSM4626767 | Normal |
| GSM4626767_ACGCCAGCACGAAGCA-1   | GSM4626767 | Normal |
| GSM4626767_ACGCCAGCAGGGATTG-1   | GSM4626767 | Normal |
| GSM4626767_ACGCCAGGTCACCCAG-1   | GSM4626767 | Normal |
| GSM4626767_ACGCCAGGTCGTCTTC-1   | GSM4626767 | Normal |
| GSM4626767_ACGCCAGTCATAAAGG-1   | GSM4626767 | Normal |
| GSM4626767_ACGCCAGTCCTTTACA-1   | GSM4626767 | Normal |
| GSM4626767_ACGCCAGTCGCATGAT-1   | GSM4626767 | Normal |
| GSM4626767_ACGCCGACAAGCCAC-1    | GSM4626767 | Normal |
| GSM4626767_ACGCCGACACAGCGTC-1   | GSM4626767 | Normal |
| GSM4626767_ACGCCGACACCAGGTC-1   | GSM4626767 | Normal |
| GSM4626767_ACGCCGACAGTACACT-1   | GSM4626767 | Normal |
| GSM4626767_ACGCCGAGTCATATCG-1   | GSM4626767 | Normal |
| GSM4626767_ACGCCGAGTGCCTTG-1    | GSM4626767 | Normal |
| GSM4626767_ACGCCGATCAAACCAC-1   | GSM4626767 | Normal |
| GSM4626767_ACGCCGATCCTGCCAT-1   | GSM4626767 | Normal |
| GSM4626767_ACGGAGAAGCTCTCGG-1   | GSM4626767 | Normal |
| GSM4626767_ACGGAGAAGGATATAC-1   | GSM4626767 | Normal |
| GSM4626767_ACGGAGACACAGAGGT-1   | GSM4626767 | Normal |
| GSM4626767_ACGGAGAGTGACGGTA-1   | GSM4626767 | Normal |
| GSM4626767_ACGGAGAGTTAGGGTG-1   | GSM4626767 | Normal |
| GSM4626767_ACGGAGATCCTCTAGC-1   | GSM4626767 | Normal |
| GSM4626767_ACGGAGATCTGGCGTG-1   | GSM4626767 | Normal |
| GSM4626767_ACGGCCAAGATGTGTA-1   | GSM4626767 | Normal |
| GSM4626767_ACGGCCAAGGGATGGG-1   | GSM4626767 | Normal |
| GSM4626767_ACGGCCAAGTCATCCA-1   | GSM4626767 | Normal |
| GSM4626767_ACGGCCACAGTATGCT-1   | GSM4626767 | Normal |
| GSM4626767_ACGGCCATCATAACCG-1   | GSM4626767 | Normal |
| GSM4626767_ACGGCCATCTGTCTAT-1   | GSM4626767 | Normal |
| GSM4626767_ACGGGCTAGCTACCTA-1   | GSM4626767 | Normal |
| GSM4626767_ACGGGCTAGTACATGA-1   | GSM4626767 | Normal |
| GSM4626767_ACGGGCTAGTCCCACG-1   | GSM4626767 | Normal |
| GSM4626767_ACGGGCTCATGCATGT-1   | GSM4626767 | Normal |
| GSM4626767_ACGGGCTGTGCGAAAC-1   | GSM4626767 | Normal |
| GSM4626767_ACGGGTCAGTGTACCT-1   | GSM4626767 | Normal |
| GSM4626767_ACGGGTCCAATGTTGC-1   | GSM4626767 | Normal |
| GSM4626767_ACGGGTCCACATAACC-1   | GSM4626767 | Normal |
| GSM4626767_ACGGGTCCACGGTGTC-1   | GSM4626767 | Normal |
| GSM4626767_ACGGGTCGTACCTACA-1   | GSM4626767 | Normal |
| GSM4626767_ACGGGTCGTTTGCATG-1   | GSM4626767 | Normal |
| GSM4626767_ACGGGTCTCTGTCTAT-1   | GSM4626767 | Normal |
| GSM4626767_ACGTCAAAGTAGTGCG-1   | GSM4626767 | Normal |
| GSM4626767_ACGTCAACAACACCCG-1   | GSM4626767 | Normal |
| GSM4626767_ACGTCAACAGATGGGT-1   | GSM4626767 | Normal |
| GSM4626767_ACGTCAACAGTTCCCT-1   | GSM4626767 | Normal |
| GSM4626767_ACGTCAAGTGTGCCTG-1   | GSM4626767 | Normal |
| GSM4626767_ACGTCAAGTTGACGTT-1   | GSM4626767 | Normal |
| GSM4626767_ACTATCTAGTCACGCC-1   | GSM4626767 | Normal |
| GSM4626767_ACTATCTAGTCGAGTG-1   | GSM4626767 | Normal |
| GSM4626767_ACTATCTGTCACTGGC-1   | GSM4626767 | Normal |
| GSM4626767_ACTGAACAGCGGATCA-1   | GSM4626767 | Normal |
| GSM4626767_ACTGAACAGGTGCAAC-1   | GSM4626767 | Normal |
| GSM4626767_ACTGAACCACTAAGTC-1   | GSM4626767 | Normal |
| GSM4626767_ACTGAACCATCTACGA-1   | GSM4626767 | Normal |
| GSM4626767_ACTGAACCAATTCCTCG-1  | GSM4626767 | Normal |

|                                |            |        |
|--------------------------------|------------|--------|
| GSM4626767_ACTGAACGTACAAGTA-1  | GSM4626767 | Normal |
| GSM4626767_ACTGAACGTTGTCGCG-1  | GSM4626767 | Normal |
| GSM4626767_ACTGAGTAGACGCACA-1  | GSM4626767 | Normal |
| GSM4626767_ACTGAGTAGTGACTION-1 | GSM4626767 | Normal |
| GSM4626767_ACTGAGTCAAAGGTGC-1  | GSM4626767 | Normal |
| GSM4626767_ACTGAGTCACAGATTC-1  | GSM4626767 | Normal |
| GSM4626767_ACTGAGTTCTCCCTGA-1  | GSM4626767 | Normal |
| GSM4626767_ACTGATGAGATCACGG-1  | GSM4626767 | Normal |
| GSM4626767_ACTGATGAGCCAGGAT-1  | GSM4626767 | Normal |
| GSM4626767_ACTGATGAGTTGTAGA-1  | GSM4626767 | Normal |
| GSM4626767_ACTGATGCATTTCGACA-1 | GSM4626767 | Normal |
| GSM4626767_ACTGATGGTACCGGCT-1  | GSM4626767 | Normal |
| GSM4626767_ACTGATGTCACTCCTG-1  | GSM4626767 | Normal |
| GSM4626767_ACTGATGTCACTTCAT-1  | GSM4626767 | Normal |
| GSM4626767_ACTGATGTCGTAGGTT-1  | GSM4626767 | Normal |
| GSM4626767_ACTGATGTCTTGTGTTG-1 | GSM4626767 | Normal |
| GSM4626767_ACTGCTCCAGACAAAT-1  | GSM4626767 | Normal |
| GSM4626767_ACTGCTCCATAGTAAG-1  | GSM4626767 | Normal |
| GSM4626767_ACTGCTCGTACACCGC-1  | GSM4626767 | Normal |
| GSM4626767_ACTGCTCGTCCAGTGC-1  | GSM4626767 | Normal |
| GSM4626767_ACTGCTCTCCTCAACC-1  | GSM4626767 | Normal |
| GSM4626767_ACTGCTCTCGTTACGA-1  | GSM4626767 | Normal |
| GSM4626767_ACTGTCCAGAACAAC-1   | GSM4626767 | Normal |
| GSM4626767_ACTGTCCAGTACACCT-1  | GSM4626767 | Normal |
| GSM4626767_ACTGTCCCAGCAGTTT-1  | GSM4626767 | Normal |
| GSM4626767_ACTGTCCGTCCAGTTA-1  | GSM4626767 | Normal |
| GSM4626767_ACTGTCCTCAAAGTAG-1  | GSM4626767 | Normal |
| GSM4626767_ACTGTCCTCAGTTCGA-1  | GSM4626767 | Normal |
| GSM4626767_ACTGTCCTCCCGGATG-1  | GSM4626767 | Normal |
| GSM4626767_ACTGTCCTCTCGAGTA-1  | GSM4626767 | Normal |
| GSM4626767_ACTTACTAGAGCTGGT-1  | GSM4626767 | Normal |
| GSM4626767_ACTTACTAGTCAAGGC-1  | GSM4626767 | Normal |
| GSM4626767_ACTTACTCACGTTGGC-1  | GSM4626767 | Normal |
| GSM4626767_ACTTACTCAGCTCCGA-1  | GSM4626767 | Normal |
| GSM4626767_ACTTACTGTAGCTTGT-1  | GSM4626767 | Normal |
| GSM4626767_ACTTACTGTTAAAGTG-1  | GSM4626767 | Normal |
| GSM4626767_ACTTACTTCACATGCA-1  | GSM4626767 | Normal |
| GSM4626767_ACTTGTTAGATGTGGC-1  | GSM4626767 | Normal |
| GSM4626767_ACTTGTTAGTTACGGG-1  | GSM4626767 | Normal |
| GSM4626767_ACTTGTTACACATGT-1   | GSM4626767 | Normal |
| GSM4626767_ACTTGTTACATCTTT-1   | GSM4626767 | Normal |
| GSM4626767_ACTTGTTGTACGAAAT-1  | GSM4626767 | Normal |
| GSM4626767_ACTTGTTGTGCAGACA-1  | GSM4626767 | Normal |
| GSM4626767_ACTTGTTTCAAACCAC-1  | GSM4626767 | Normal |
| GSM4626767_ACTTGTTTCAAAATG-1   | GSM4626767 | Normal |
| GSM4626767_ACTTGTTTCGGACAAG-1  | GSM4626767 | Normal |
| GSM4626767_ACTTGTTTCTAACGGT-1  | GSM4626767 | Normal |
| GSM4626767_ACTTTCAAGGGTATCG-1  | GSM4626767 | Normal |
| GSM4626767_ACTTTCAAGTCTCCT-1   | GSM4626767 | Normal |
| GSM4626767_ACTTTCAAGTGATCGG-1  | GSM4626767 | Normal |
| GSM4626767_ACTTTCACACCTATCC-1  | GSM4626767 | Normal |
| GSM4626767_ACTTTCACATCAGTAC-1  | GSM4626767 | Normal |
| GSM4626767_ACTTTCAGTGACGGTA-1  | GSM4626767 | Normal |
| GSM4626767_ACTTTCAGTGTAAGTA-1  | GSM4626767 | Normal |
| GSM4626767_ACTTTTCATCAGTCAGT-1 | GSM4626767 | Normal |
| GSM4626767_ACTTTTCATCGCGTAGC-1 | GSM4626767 | Normal |
| GSM4626767_ACTTTTCATCTTACCTA-1 | GSM4626767 | Normal |

|                                |            |        |
|--------------------------------|------------|--------|
| GSM4626767_AGAATAGAGCCGGTAA-1  | GSM4626767 | Normal |
| GSM4626767_AGAATAGAGCTTATCG-1  | GSM4626767 | Normal |
| GSM4626767_AGAATAGAGGTGGGTT-1  | GSM4626767 | Normal |
| GSM4626767_AGAATAGGTTCGCGAAA-1 | GSM4626767 | Normal |
| GSM4626767_AGAATAGGTTGGTAAA-1  | GSM4626767 | Normal |
| GSM4626767_AGAATAGTCTTCCTTC-1  | GSM4626767 | Normal |
| GSM4626767_AGACGTTTCATTGAGCT-1 | GSM4626767 | Normal |
| GSM4626767_AGACGTTGTGTGTGCC-1  | GSM4626767 | Normal |
| GSM4626767_AGACGTTGTTAAAGTG-1  | GSM4626767 | Normal |
| GSM4626767_AGACGTTTCCTTGACC-1  | GSM4626767 | Normal |
| GSM4626767_AGACGTTTCCTTCGG-1   | GSM4626767 | Normal |
| GSM4626767_AGACGTTTCCTTCGAGA-1 | GSM4626767 | Normal |
| GSM4626767_AGAGCGAAGAGACGAA-1  | GSM4626767 | Normal |
| GSM4626767_AGAGCGAAGCAGGCTA-1  | GSM4626767 | Normal |
| GSM4626767_AGAGCGAAGTCGAGTG-1  | GSM4626767 | Normal |
| GSM4626767_AGAGCGACATGGTCAT-1  | GSM4626767 | Normal |
| GSM4626767_AGAGCGAGTCATGCCG-1  | GSM4626767 | Normal |
| GSM4626767_AGAGCGAGTTCGAATC-1  | GSM4626767 | Normal |
| GSM4626767_AGAGCTTAGATAGTCA-1  | GSM4626767 | Normal |
| GSM4626767_AGAGCTTAGGGTCTCC-1  | GSM4626767 | Normal |
| GSM4626767_AGAGCTTCAGATAATG-1  | GSM4626767 | Normal |
| GSM4626767_AGAGCTTCATGTCTCC-1  | GSM4626767 | Normal |
| GSM4626767_AGAGCTTGTGCGAGATG-1 | GSM4626767 | Normal |
| GSM4626767_AGAGCTTGTGACTCAT-1  | GSM4626767 | Normal |
| GSM4626767_AGAGCTTCCACGTGG-1   | GSM4626767 | Normal |
| GSM4626767_AGAGCTTCCCTAATT-1   | GSM4626767 | Normal |
| GSM4626767_AGAGCTTCTCTGCTG-1   | GSM4626767 | Normal |
| GSM4626767_AGAGTGGAGCTAAGAT-1  | GSM4626767 | Normal |
| GSM4626767_AGAGTGGCAAAGGCGT-1  | GSM4626767 | Normal |
| GSM4626767_AGAGTGGCACTGCCAG-1  | GSM4626767 | Normal |
| GSM4626767_AGAGTGGCATTGGCGC-1  | GSM4626767 | Normal |
| GSM4626767_AGAGTGGGTGGTTTCA-1  | GSM4626767 | Normal |
| GSM4626767_AGAGTGGTCAACCAAC-1  | GSM4626767 | Normal |
| GSM4626767_AGAGTGGTCAACGGGA-1  | GSM4626767 | Normal |
| GSM4626767_AGAGTGGTCACTGGGC-1  | GSM4626767 | Normal |
| GSM4626767_AGAGTGGTCTGCCCTA-1  | GSM4626767 | Normal |
| GSM4626767_AGATCTGAGATAGTCA-1  | GSM4626767 | Normal |
| GSM4626767_AGATCTGAGGCCCTTG-1  | GSM4626767 | Normal |
| GSM4626767_AGATCTGAGTGAATTG-1  | GSM4626767 | Normal |
| GSM4626767_AGATCTGAGTGTACTC-1  | GSM4626767 | Normal |
| GSM4626767_AGATCTGCAGTCAGAG-1  | GSM4626767 | Normal |
| GSM4626767_AGATCTGCATGACATC-1  | GSM4626767 | Normal |
| GSM4626767_AGATCTGCATGTCCTC-1  | GSM4626767 | Normal |
| GSM4626767_AGATCTGGTCAATGTC-1  | GSM4626767 | Normal |
| GSM4626767_AGATCTGGTGTTAAGA-1  | GSM4626767 | Normal |
| GSM4626767_AGATCTGGTTCCTTG-1   | GSM4626767 | Normal |
| GSM4626767_AGATCTGTCACCGTAA-1  | GSM4626767 | Normal |
| GSM4626767_AGATCTGTCCCTTGCA-1  | GSM4626767 | Normal |
| GSM4626767_AGATCTGTCCGCGGTA-1  | GSM4626767 | Normal |
| GSM4626767_AGATCTGTCCGATGGC-1  | GSM4626767 | Normal |
| GSM4626767_AGATTGCAGATCTGAA-1  | GSM4626767 | Normal |
| GSM4626767_AGATTGCAGCTGCCCA-1  | GSM4626767 | Normal |
| GSM4626767_AGATTGCAGCTGGAAC-1  | GSM4626767 | Normal |
| GSM4626767_AGATTGCAGTTTAGGA-1  | GSM4626767 | Normal |
| GSM4626767_AGATTGCCAATCCAAC-1  | GSM4626767 | Normal |
| GSM4626767_AGATTGCGTAATCGTC-1  | GSM4626767 | Normal |
| GSM4626767_AGATTGCGTAGCGTCC-1  | GSM4626767 | Normal |

|                                |            |        |
|--------------------------------|------------|--------|
| GSM4626767_AGATTGCGTCCGAAGA-1  | GSM4626767 | Normal |
| GSM4626767_AGATTGCTCGACCAGC-1  | GSM4626767 | Normal |
| GSM4626767_AGCAGCCAGAATCTCC-1  | GSM4626767 | Normal |
| GSM4626767_AGCAGCCAGCCCTAAT-1  | GSM4626767 | Normal |
| GSM4626767_AGCAGCCAGCTGGAAC-1  | GSM4626767 | Normal |
| GSM4626767_AGCAGCCAGGGAGTAA-1  | GSM4626767 | Normal |
| GSM4626767_AGCAGCCAGGGCTCTC-1  | GSM4626767 | Normal |
| GSM4626767_AGCAGCCCACCAGCAC-1  | GSM4626767 | Normal |
| GSM4626767_AGCAGCCCATATGCTG-1  | GSM4626767 | Normal |
| GSM4626767_AGCAGCCCATTAGCCA-1  | GSM4626767 | Normal |
| GSM4626767_AGCAGCCGTAATCACC-1  | GSM4626767 | Normal |
| GSM4626767_AGCAGCCGTGACCAAG-1  | GSM4626767 | Normal |
| GSM4626767_AGCAGCCGTGCAGTAG-1  | GSM4626767 | Normal |
| GSM4626767_AGCAGCCGTGTGAAAT-1  | GSM4626767 | Normal |
| GSM4626767_AGCAGCCTCGGTGTCG-1  | GSM4626767 | Normal |
| GSM4626767_AGCAGCCTCGTGGTTCG-1 | GSM4626767 | Normal |
| GSM4626767_AGCATACAGAATTGTG-1  | GSM4626767 | Normal |
| GSM4626767_AGCATACCACCATGTA-1  | GSM4626767 | Normal |
| GSM4626767_AGCATACCACGTGAGA-1  | GSM4626767 | Normal |
| GSM4626767_AGCATACGTCCCTACT-1  | GSM4626767 | Normal |
| GSM4626767_AGCATACGTTGGTAAA-1  | GSM4626767 | Normal |
| GSM4626767_AGCATACTCAGCTTAG-1  | GSM4626767 | Normal |
| GSM4626767_AGCATACTCCTGCTTG-1  | GSM4626767 | Normal |
| GSM4626767_AGCATACTCTTCGGTC-1  | GSM4626767 | Normal |
| GSM4626767_AGCATACTCTTTAGGG-1  | GSM4626767 | Normal |
| GSM4626767_AGCCTAAAGAGGTACC-1  | GSM4626767 | Normal |
| GSM4626767_AGCCTAAAGATATGCA-1  | GSM4626767 | Normal |
| GSM4626767_AGCCTAACAAAGCAAT-1  | GSM4626767 | Normal |
| GSM4626767_AGCCTAACAGGACCCT-1  | GSM4626767 | Normal |
| GSM4626767_AGCCTAACATGTTCCC-1  | GSM4626767 | Normal |
| GSM4626767_AGCCTAAGTCCGTTAA-1  | GSM4626767 | Normal |
| GSM4626767_AGCCTAAGTGACTACT-1  | GSM4626767 | Normal |
| GSM4626767_AGCCTAAGTGATGTGG-1  | GSM4626767 | Normal |
| GSM4626767_AGCCTAATCACAGTAC-1  | GSM4626767 | Normal |
| GSM4626767_AGCGGTCAGACCGGAT-1  | GSM4626767 | Normal |
| GSM4626767_AGCGGTCAGTGAGAA-1   | GSM4626767 | Normal |
| GSM4626767_AGCGGTCACCAACCG-1   | GSM4626767 | Normal |
| GSM4626767_AGCGGTCGTAACCTC-1   | GSM4626767 | Normal |
| GSM4626767_AGCGGTCGTAAGTGGC-1  | GSM4626767 | Normal |
| GSM4626767_AGCGGTCGTAAGTTCC-1  | GSM4626767 | Normal |
| GSM4626767_AGCGGTCGTACAGACG-1  | GSM4626767 | Normal |
| GSM4626767_AGCGGTCGTGCGAAAC-1  | GSM4626767 | Normal |
| GSM4626767_AGCGGTCGTGGTCCGT-1  | GSM4626767 | Normal |
| GSM4626767_AGCGTATAGATAGCAT-1  | GSM4626767 | Normal |
| GSM4626767_AGCGTATAGCTACCGC-1  | GSM4626767 | Normal |
| GSM4626767_AGCGTATAGCTAGTCT-1  | GSM4626767 | Normal |
| GSM4626767_AGCGTATCAGCTCCGA-1  | GSM4626767 | Normal |
| GSM4626767_AGCGTATGTAAGGGAA-1  | GSM4626767 | Normal |
| GSM4626767_AGCGTATGTCTTCTCG-1  | GSM4626767 | Normal |
| GSM4626767_AGCGTCGAGCTAGTTC-1  | GSM4626767 | Normal |
| GSM4626767_AGCGTCGCAGCATACT-1  | GSM4626767 | Normal |
| GSM4626767_AGCGTCGGTTTGTGTG-1  | GSM4626767 | Normal |
| GSM4626767_AGCGTCGTCGCAGGCT-1  | GSM4626767 | Normal |
| GSM4626767_AGCGTCGTCTGTTTGT-1  | GSM4626767 | Normal |
| GSM4626767_AGCGTCGTCTTCAACT-1  | GSM4626767 | Normal |
| GSM4626767_AGCTCCTAGAGACTAT-1  | GSM4626767 | Normal |
| GSM4626767_AGCTCCTAGCTCCCAG-1  | GSM4626767 | Normal |

|                                |            |        |
|--------------------------------|------------|--------|
| GSM4626767_AGCTCCTAGCTGCGAA-1  | GSM4626767 | Normal |
| GSM4626767_AGCTCCTAGGTCGGAT-1  | GSM4626767 | Normal |
| GSM4626767_AGCTCCTCAATAGCGG-1  | GSM4626767 | Normal |
| GSM4626767_AGCTCCTCACACATGT-1  | GSM4626767 | Normal |
| GSM4626767_AGCTCCTCAGTGGAGT-1  | GSM4626767 | Normal |
| GSM4626767_AGCTCCTCATCACAAC-1  | GSM4626767 | Normal |
| GSM4626767_AGCTCCTGTGGTGTAG-1  | GSM4626767 | Normal |
| GSM4626767_AGCTCCTTCATCTGTT-1  | GSM4626767 | Normal |
| GSM4626767_AGCTCTCAGTTTCCTT-1  | GSM4626767 | Normal |
| GSM4626767_AGCTCTCCACAGGCCT-1  | GSM4626767 | Normal |
| GSM4626767_AGCTCTCGTAAGGGCT-1  | GSM4626767 | Normal |
| GSM4626767_AGCTCTCGTACCGTTA-1  | GSM4626767 | Normal |
| GSM4626767_AGCTCTCGTCCGTTAA-1  | GSM4626767 | Normal |
| GSM4626767_AGCTCTCGTCGCTTTC-1  | GSM4626767 | Normal |
| GSM4626767_AGCTCTCGTTAAAGAC-1  | GSM4626767 | Normal |
| GSM4626767_AGCTCTCGTTCGTCTC-1  | GSM4626767 | Normal |
| GSM4626767_AGCTCTCTCCTGTACC-1  | GSM4626767 | Normal |
| GSM4626767_AGCTCTCTCTCTGCTG-1  | GSM4626767 | Normal |
| GSM4626767_AGCTTGAAGTAGGCCA-1  | GSM4626767 | Normal |
| GSM4626767_AGCTTGACAAGGTTCT-1  | GSM4626767 | Normal |
| GSM4626767_AGCTTGACAATAGAGT-1  | GSM4626767 | Normal |
| GSM4626767_AGCTTGACAGCTGTAT-1  | GSM4626767 | Normal |
| GSM4626767_AGCTTGACAGGCGATA-1  | GSM4626767 | Normal |
| GSM4626767_AGCTTGAGTATATCCG-1  | GSM4626767 | Normal |
| GSM4626767_AGCTTGAGTTAGGGTG-1  | GSM4626767 | Normal |
| GSM4626767_AGCTTGAGTTCCATGA-1  | GSM4626767 | Normal |
| GSM4626767_AGCTTGAGTTTAAGCC-1  | GSM4626767 | Normal |
| GSM4626767_AGCTTGATCACGCATA-1  | GSM4626767 | Normal |
| GSM4626767_AGCTTGATCAGTTGAC-1  | GSM4626767 | Normal |
| GSM4626767_AGCTTGATCCGGGTGT-1  | GSM4626767 | Normal |
| GSM4626767_AGGCCACAGCCGATTT-1  | GSM4626767 | Normal |
| GSM4626767_AGGCCACAGTAATCCC-1  | GSM4626767 | Normal |
| GSM4626767_AGGCCACAGTACCGGA-1  | GSM4626767 | Normal |
| GSM4626767_AGGCCACGTCTTTCAT-1  | GSM4626767 | Normal |
| GSM4626767_AGGCCACGTTGTCGCG-1  | GSM4626767 | Normal |
| GSM4626767_AGGCCGTAGGGTGTGT-1  | GSM4626767 | Normal |
| GSM4626767_AGGCCGTACAGACAGGT-1 | GSM4626767 | Normal |
| GSM4626767_AGGCCGTGTCCGAGTC-1  | GSM4626767 | Normal |
| GSM4626767_AGGCCGTTCAACACCA-1  | GSM4626767 | Normal |
| GSM4626767_AGGGAGTTCACATAGC-1  | GSM4626767 | Normal |
| GSM4626767_AGGGAGTTCAGAAATG-1  | GSM4626767 | Normal |
| GSM4626767_AGGGAGTTCCTTGTTG-1  | GSM4626767 | Normal |
| GSM4626767_AGGGAGTTCGCTTGTC-1  | GSM4626767 | Normal |
| GSM4626767_AGGGATGAGCTACCGC-1  | GSM4626767 | Normal |
| GSM4626767_AGGGATGAGTATCTCG-1  | GSM4626767 | Normal |
| GSM4626767_AGGGATGCAGCTCCGA-1  | GSM4626767 | Normal |
| GSM4626767_AGGGATGCATCCCACT-1  | GSM4626767 | Normal |
| GSM4626767_AGGGATGGTCTAAACC-1  | GSM4626767 | Normal |
| GSM4626767_AGGGATGGTGACGCCT-1  | GSM4626767 | Normal |
| GSM4626767_AGGGATGGTGGGTCAA-1  | GSM4626767 | Normal |
| GSM4626767_AGGGATGTCTATGTGG-1  | GSM4626767 | Normal |
| GSM4626767_AGGGTGACAATGACCT-1  | GSM4626767 | Normal |
| GSM4626767_AGGGTGAGTACTCGCG-1  | GSM4626767 | Normal |
| GSM4626767_AGGGTGAGTCAACTGT-1  | GSM4626767 | Normal |
| GSM4626767_AGGGTGAGTGCGATAG-1  | GSM4626767 | Normal |
| GSM4626767_AGGGTGATCACATAGC-1  | GSM4626767 | Normal |
| GSM4626767_AGGGTGATCATCGATG-1  | GSM4626767 | Normal |

|                                |            |        |
|--------------------------------|------------|--------|
| GSM4626767_AGGGTGATCCGAATGT-1  | GSM4626767 | Normal |
| GSM4626767_AGGTCATAGCTAACTC-1  | GSM4626767 | Normal |
| GSM4626767_AGGTCATAGGACAGCT-1  | GSM4626767 | Normal |
| GSM4626767_AGGTCATAGTTACGGG-1  | GSM4626767 | Normal |
| GSM4626767_AGGTCATGTAAGAGGA-1  | GSM4626767 | Normal |
| GSM4626767_AGGTCATGTAAGGATT-1  | GSM4626767 | Normal |
| GSM4626767_AGGTCATGTTGATTGC-1  | GSM4626767 | Normal |
| GSM4626767_AGGTCATTCATCGCTC-1  | GSM4626767 | Normal |
| GSM4626767_AGGTCATTCCTAGGGC-1  | GSM4626767 | Normal |
| GSM4626767_AGGTCATTCTGTGCAA-1  | GSM4626767 | Normal |
| GSM4626767_AGGTCATTCTTAACCT-1  | GSM4626767 | Normal |
| GSM4626767_AGGTCCGAGACCGGAT-1  | GSM4626767 | Normal |
| GSM4626767_AGGTCCGAGATCGGGT-1  | GSM4626767 | Normal |
| GSM4626767_AGGTCCGAGGCGCTCT-1  | GSM4626767 | Normal |
| GSM4626767_AGGTCCGGTCAACATC-1  | GSM4626767 | Normal |
| GSM4626767_AGGTCCGGTCCGAATT-1  | GSM4626767 | Normal |
| GSM4626767_AGGTCCGTCATCGATG-1  | GSM4626767 | Normal |
| GSM4626767_AGGTCCGTCTTCGGTC-1  | GSM4626767 | Normal |
| GSM4626767_AGTAGTCAGCTGTTCA-1  | GSM4626767 | Normal |
| GSM4626767_AGTAGTCAGTCCGTAT-1  | GSM4626767 | Normal |
| GSM4626767_AGTAGTCCAACACCTA-1  | GSM4626767 | Normal |
| GSM4626767_AGTAGTCCAATGGAAT-1  | GSM4626767 | Normal |
| GSM4626767_AGTAGTCCAGATGAGC-1  | GSM4626767 | Normal |
| GSM4626767_AGTAGTCCATATACGC-1  | GSM4626767 | Normal |
| GSM4626767_AGTAGTCCATGGGAAC-1  | GSM4626767 | Normal |
| GSM4626767_AGTAGTCGTCGATTGT-1  | GSM4626767 | Normal |
| GSM4626767_AGTAGTCTCGCCGTGA-1  | GSM4626767 | Normal |
| GSM4626767_AGTCTTTAGATAGCAT-1  | GSM4626767 | Normal |
| GSM4626767_AGTCTTTAGTTGTCGT-1  | GSM4626767 | Normal |
| GSM4626767_AGTCTTTCATCATCCC-1  | GSM4626767 | Normal |
| GSM4626767_AGTCTTTCATCGGAAG-1  | GSM4626767 | Normal |
| GSM4626767_AGTCTTTTCGATGAGG-1  | GSM4626767 | Normal |
| GSM4626767_AGTCTTTTCGTACCGG-1  | GSM4626767 | Normal |
| GSM4626767_AGTCTTTTCGTCTTC-1   | GSM4626767 | Normal |
| GSM4626767_AGTGAGGAGACTACAA-1  | GSM4626767 | Normal |
| GSM4626767_AGTGAGGAGTACTTGC-1  | GSM4626767 | Normal |
| GSM4626767_AGTGAGGCAGACGCCT-1  | GSM4626767 | Normal |
| GSM4626767_AGTGAGGCAGATGGCA-1  | GSM4626767 | Normal |
| GSM4626767_AGTGAGGCAGCTGTTA-1  | GSM4626767 | Normal |
| GSM4626767_AGTGAGGGTCAGGACA-1  | GSM4626767 | Normal |
| GSM4626767_AGTGAGGGTTATGCGT-1  | GSM4626767 | Normal |
| GSM4626767_AGTGAGGTCCAAAGTC-1  | GSM4626767 | Normal |
| GSM4626767_AGTGAGGTCTCTGAGA-1  | GSM4626767 | Normal |
| GSM4626767_AGTGAGGTCTTTCCTC-1  | GSM4626767 | Normal |
| GSM4626767_AGTGGGAAGAGTCCGGT-1 | GSM4626767 | Normal |
| GSM4626767_AGTGGGAAGGCAGTCA-1  | GSM4626767 | Normal |
| GSM4626767_AGTGGGAAGGTAAACT-1  | GSM4626767 | Normal |
| GSM4626767_AGTGGGAAGTGCTGCC-1  | GSM4626767 | Normal |
| GSM4626767_AGTGGGACACATCTTT-1  | GSM4626767 | Normal |
| GSM4626767_AGTGGGAGTCAGTGGA-1  | GSM4626767 | Normal |
| GSM4626767_AGTGGGATCAACCATG-1  | GSM4626767 | Normal |
| GSM4626767_AGTGGGATCAACGCTA-1  | GSM4626767 | Normal |
| GSM4626767_AGTGGGATCCAAACAC-1  | GSM4626767 | Normal |
| GSM4626767_AGTGTCAAGCCCAACC-1  | GSM4626767 | Normal |
| GSM4626767_AGTGTACAATAACGCT-1  | GSM4626767 | Normal |
| GSM4626767_AGTGTACACAGGTA-1    | GSM4626767 | Normal |
| GSM4626767_AGTGTACACAGTCCTTC-1 | GSM4626767 | Normal |

|                               |            |        |
|-------------------------------|------------|--------|
| GSM4626767_AGTTGGTAGACTAAGT-1 | GSM4626767 | Normal |
| GSM4626767_AGTTGGTCACAGGCCT-1 | GSM4626767 | Normal |
| GSM4626767_AGTTGGTCACCAGGCT-1 | GSM4626767 | Normal |
| GSM4626767_AGTTGGTGTCTTCGTC-1 | GSM4626767 | Normal |
| GSM4626767_AGTTGGTTCCAAGCCG-1 | GSM4626767 | Normal |
| GSM4626767_AGTTGGTTCTTGCATT-1 | GSM4626767 | Normal |
| GSM4626767_ATAACGCAGAAACCTA-1 | GSM4626767 | Normal |
| GSM4626767_ATAACGCAGGTGCTAG-1 | GSM4626767 | Normal |
| GSM4626767_ATAACGCCAATCTGCA-1 | GSM4626767 | Normal |
| GSM4626767_ATAACGCCAGACGCTC-1 | GSM4626767 | Normal |
| GSM4626767_ATAACGCCATTATCTC-1 | GSM4626767 | Normal |
| GSM4626767_ATAACGCGTCAGCTAT-1 | GSM4626767 | Normal |
| GSM4626767_ATAACGCGTGATAAGT-1 | GSM4626767 | Normal |
| GSM4626767_ATAAGAGAGAGCAATT-1 | GSM4626767 | Normal |
| GSM4626767_ATAAGAGCATCGGTTA-1 | GSM4626767 | Normal |
| GSM4626767_ATAAGAGTCATACGGT-1 | GSM4626767 | Normal |
| GSM4626767_ATAAGAGTCATGTCCC-1 | GSM4626767 | Normal |
| GSM4626767_ATAAGAGTCCGCAAGC-1 | GSM4626767 | Normal |
| GSM4626767_ATAAGAGTCGCGTTTC-1 | GSM4626767 | Normal |
| GSM4626767_ATAGACCAGGCATTGG-1 | GSM4626767 | Normal |
| GSM4626767_ATAGACCCACACATGT-1 | GSM4626767 | Normal |
| GSM4626767_ATAGACCCATGTAGTC-1 | GSM4626767 | Normal |
| GSM4626767_ATAGACCGTGCATCTA-1 | GSM4626767 | Normal |
| GSM4626767_ATAGACCGTGCCAAAC-1 | GSM4626767 | Normal |
| GSM4626767_ATAGACCGTTAGATGA-1 | GSM4626767 | Normal |
| GSM4626767_ATCACGAAGAGTGAGA-1 | GSM4626767 | Normal |
| GSM4626767_ATCACGAAGATAGGAG-1 | GSM4626767 | Normal |
| GSM4626767_ATCACGAGTATGGTTC-1 | GSM4626767 | Normal |
| GSM4626767_ATCACGAGTCATTAGC-1 | GSM4626767 | Normal |
| GSM4626767_ATCACGAGTTGTGGAG-1 | GSM4626767 | Normal |
| GSM4626767_ATCACGATCGCTAGCG-1 | GSM4626767 | Normal |
| GSM4626767_ATCACGATCGTTGCCT-1 | GSM4626767 | Normal |
| GSM4626767_ATCATCTAGCCCGAAA-1 | GSM4626767 | Normal |
| GSM4626767_ATCATCTAGCGTCTAT-1 | GSM4626767 | Normal |
| GSM4626767_ATCATCTAGTTAAGTG-1 | GSM4626767 | Normal |
| GSM4626767_ATCATCTCAGCCTTTC-1 | GSM4626767 | Normal |
| GSM4626767_ATCATCTGTACCCAAT-1 | GSM4626767 | Normal |
| GSM4626767_ATCATCTGTCATCCCT-1 | GSM4626767 | Normal |
| GSM4626767_ATCATCTGTGCTTCTC-1 | GSM4626767 | Normal |
| GSM4626767_ATCATCTTCCGGTGT-1  | GSM4626767 | Normal |
| GSM4626767_ATCATCTTCGTGGACC-1 | GSM4626767 | Normal |
| GSM4626767_ATCATGGAGCACGCCT-1 | GSM4626767 | Normal |
| GSM4626767_ATCATGGCAACAACCT-1 | GSM4626767 | Normal |
| GSM4626767_ATCATGGGTCTCCCTA-1 | GSM4626767 | Normal |
| GSM4626767_ATCATGGGTTCTGAAC-1 | GSM4626767 | Normal |
| GSM4626767_ATCATGGTCATGTGGT-1 | GSM4626767 | Normal |
| GSM4626767_ATCCACCCACTTGGAT-1 | GSM4626767 | Normal |
| GSM4626767_ATCCACCCATAAAGGT-1 | GSM4626767 | Normal |
| GSM4626767_ATCCACCGTGCGCTTG-1 | GSM4626767 | Normal |
| GSM4626767_ATCCACCGTTATCACG-1 | GSM4626767 | Normal |
| GSM4626767_ATCCGAAAGCATGGCA-1 | GSM4626767 | Normal |
| GSM4626767_ATCCGAAAGCCACTAT-1 | GSM4626767 | Normal |
| GSM4626767_ATCCGAACAAGCGATG-1 | GSM4626767 | Normal |
| GSM4626767_ATCCGAACACACTGCG-1 | GSM4626767 | Normal |
| GSM4626767_ATCCGAACACTGTGTA-1 | GSM4626767 | Normal |
| GSM4626767_ATCCGAACATATGGTC-1 | GSM4626767 | Normal |
| GSM4626767_ATCCGAAGTCGCGTGT-1 | GSM4626767 | Normal |

|                                 |            |        |
|---------------------------------|------------|--------|
| GSM4626767_ATCCGAAGTGGACGAT-1   | GSM4626767 | Normal |
| GSM4626767_ATCCGAAGTTTGGCGC-1   | GSM4626767 | Normal |
| GSM4626767_ATCGAGTAGAGTGACC-1   | GSM4626767 | Normal |
| GSM4626767_ATCGAGTCACGGTGTGTC-1 | GSM4626767 | Normal |
| GSM4626767_ATCGAGTCATCTACGA-1   | GSM4626767 | Normal |
| GSM4626767_ATCGAGTCATGTCCTC-1   | GSM4626767 | Normal |
| GSM4626767_ATCGAGTGTCTTGTCC-1   | GSM4626767 | Normal |
| GSM4626767_ATCTACTAGATATGGT-1   | GSM4626767 | Normal |
| GSM4626767_ATCTACTAGGCTATCT-1   | GSM4626767 | Normal |
| GSM4626767_ATCTACTACAAGTAA-1    | GSM4626767 | Normal |
| GSM4626767_ATCTACTCAGGATCGA-1   | GSM4626767 | Normal |
| GSM4626767_ATCTACTGTAGCCTCG-1   | GSM4626767 | Normal |
| GSM4626767_ATCTACTGTCACCCAG-1   | GSM4626767 | Normal |
| GSM4626767_ATCTACTTCCCATTTA-1   | GSM4626767 | Normal |
| GSM4626767_ATCTACTTCCCTTGTG-1   | GSM4626767 | Normal |
| GSM4626767_ATCTGCCAGCTACCGC-1   | GSM4626767 | Normal |
| GSM4626767_ATCTGCCAGGATGGTC-1   | GSM4626767 | Normal |
| GSM4626767_ATCTGCCAGGCATTGG-1   | GSM4626767 | Normal |
| GSM4626767_ATCTGCCCAATAACGA-1   | GSM4626767 | Normal |
| GSM4626767_ATCTGCCCAATGGAAT-1   | GSM4626767 | Normal |
| GSM4626767_ATCTGCCTCGATGAGG-1   | GSM4626767 | Normal |
| GSM4626767_ATCTGCCTCGTGACAT-1   | GSM4626767 | Normal |
| GSM4626767_ATGAGGGAGCCCAACC-1   | GSM4626767 | Normal |
| GSM4626767_ATGAGGGCACCTATCC-1   | GSM4626767 | Normal |
| GSM4626767_ATGAGGGCATGTCTCC-1   | GSM4626767 | Normal |
| GSM4626767_ATGAGGGGTGATGTCT-1   | GSM4626767 | Normal |
| GSM4626767_ATGAGGGTCAAACGGG-1   | GSM4626767 | Normal |
| GSM4626767_ATGAGGGTCGCTGATA-1   | GSM4626767 | Normal |
| GSM4626767_ATGCGATAGACATAAC-1   | GSM4626767 | Normal |
| GSM4626767_ATGCGATAGGAGTTGC-1   | GSM4626767 | Normal |
| GSM4626767_ATGCGATTCCAGATCA-1   | GSM4626767 | Normal |
| GSM4626767_ATGCGATTCCCTTCAAT-1  | GSM4626767 | Normal |
| GSM4626767_ATGCGATTCTTCATGT-1   | GSM4626767 | Normal |
| GSM4626767_ATGGGAGAGCCCAACC-1   | GSM4626767 | Normal |
| GSM4626767_ATGGGAGAGGGAGTAA-1   | GSM4626767 | Normal |
| GSM4626767_ATGGGAGGTTTAAGCC-1   | GSM4626767 | Normal |
| GSM4626767_ATGGGAGTCGAATGCT-1   | GSM4626767 | Normal |
| GSM4626767_ATGGGAGTCTAAGCCA-1   | GSM4626767 | Normal |
| GSM4626767_ATGGGAGTCTGGGCCA-1   | GSM4626767 | Normal |
| GSM4626767_ATGTGTGAGATGTGTA-1   | GSM4626767 | Normal |
| GSM4626767_ATGTGTGCACCAACCG-1   | GSM4626767 | Normal |
| GSM4626767_ATGTGTGCATAACCTG-1   | GSM4626767 | Normal |
| GSM4626767_ATGTGTGCATCCCACT-1   | GSM4626767 | Normal |
| GSM4626767_ATGTGTGGTCTCCATC-1   | GSM4626767 | Normal |
| GSM4626767_ATGTGTGGTTATCGGT-1   | GSM4626767 | Normal |
| GSM4626767_ATGTGTGTCGGAGCAA-1   | GSM4626767 | Normal |
| GSM4626767_ATGTGTGTCGTCACGG-1   | GSM4626767 | Normal |
| GSM4626767_ATGTGTGTCTACCTGC-1   | GSM4626767 | Normal |
| GSM4626767_ATGTGTGTCTGTCTCG-1   | GSM4626767 | Normal |
| GSM4626767_ATTACTCAGGATGCGT-1   | GSM4626767 | Normal |
| GSM4626767_ATTACTCAGGTGACCA-1   | GSM4626767 | Normal |
| GSM4626767_ATTACTCAGTTAAGTG-1   | GSM4626767 | Normal |
| GSM4626767_ATTACTCCAGTTCCT-1    | GSM4626767 | Normal |
| GSM4626767_ATTACTCGTGTTTCGAT-1  | GSM4626767 | Normal |
| GSM4626767_ATTACTCTCATATCGG-1   | GSM4626767 | Normal |
| GSM4626767_ATTACTCTCTATCGCC-1   | GSM4626767 | Normal |
| GSM4626767_ATTATCCAGCCGGTAA-1   | GSM4626767 | Normal |



|                                |            |        |
|--------------------------------|------------|--------|
| GSM4626767_ATTATCCAGGGAGTAA-1  | GSM4626767 | Normal |
| GSM4626767_ATTATCCGTCCGAAGA-1  | GSM4626767 | Normal |
| GSM4626767_ATTATCCGTCTCAACA-1  | GSM4626767 | Normal |
| GSM4626767_ATTATCCTCGCGATCG-1  | GSM4626767 | Normal |
| GSM4626767_ATTCTACAGTGGGCTA-1  | GSM4626767 | Normal |
| GSM4626767_ATTCTACCAAACGCGA-1  | GSM4626767 | Normal |
| GSM4626767_ATTCTACCACGGCGTT-1  | GSM4626767 | Normal |
| GSM4626767_ATTCTACCATGGATGG-1  | GSM4626767 | Normal |
| GSM4626767_ATTCTACGTGTGACCC-1  | GSM4626767 | Normal |
| GSM4626767_ATTCTACGTTAAGATG-1  | GSM4626767 | Normal |
| GSM4626767_ATTCTACTCCACTGGG-1  | GSM4626767 | Normal |
| GSM4626767_ATTCTACTCCAGGGCT-1  | GSM4626767 | Normal |
| GSM4626767_ATTCTACTCTGATACG-1  | GSM4626767 | Normal |
| GSM4626767_ATTGGACAGACTAAGT-1  | GSM4626767 | Normal |
| GSM4626767_ATTGGACCAGTATAAG-1  | GSM4626767 | Normal |
| GSM4626767_ATTGGACTCACCACCT-1  | GSM4626767 | Normal |
| GSM4626767_ATTGGACTCCGAGCCA-1  | GSM4626767 | Normal |
| GSM4626767_ATTGGACTCGTAGGAG-1  | GSM4626767 | Normal |
| GSM4626767_ATTGGTGAGCCTCGTG-1  | GSM4626767 | Normal |
| GSM4626767_ATTGGTGCAAAGTGCG-1  | GSM4626767 | Normal |
| GSM4626767_ATTTCTGCAAATACAG-1  | GSM4626767 | Normal |
| GSM4626767_ATTTCTGCAAGTTTC-1   | GSM4626767 | Normal |
| GSM4626767_ATTTCTGCAGCGTCCA-1  | GSM4626767 | Normal |
| GSM4626767_ATTTCTGCATCCTAGA-1  | GSM4626767 | Normal |
| GSM4626767_ATTTCTGCATGGGAAC-1  | GSM4626767 | Normal |
| GSM4626767_ATTTCTGGTCAGCTAT-1  | GSM4626767 | Normal |
| GSM4626767_ATTTCTGGTGCAGGTA-1  | GSM4626767 | Normal |
| GSM4626767_ATTTCTGTCCACGTTC-1  | GSM4626767 | Normal |
| GSM4626767_CAACCAAAGAACTCGG-1  | GSM4626767 | Normal |
| GSM4626767_CAACCAAAGAAGGCCT-1  | GSM4626767 | Normal |
| GSM4626767_CAACCAAAGAGCTGGT-1  | GSM4626767 | Normal |
| GSM4626767_CAACCAAAGTACACCT-1  | GSM4626767 | Normal |
| GSM4626767_CAACCAAAGTGGTAGC-1  | GSM4626767 | Normal |
| GSM4626767_CAACCAACATGATCCA-1  | GSM4626767 | Normal |
| GSM4626767_CAACCAAGTAGCTGCC-1  | GSM4626767 | Normal |
| GSM4626767_CAACCAAGTCGTTCT-1   | GSM4626767 | Normal |
| GSM4626767_CAACCAAGTGAGGGAG-1  | GSM4626767 | Normal |
| GSM4626767_CAACCAAGTGGCAAAC-1  | GSM4626767 | Normal |
| GSM4626767_CAACCAATCAGTGCAT-1  | GSM4626767 | Normal |
| GSM4626767_CAACCAATCCGCTGTT-1  | GSM4626767 | Normal |
| GSM4626767_CAACCTCAGGTGCTTT-1  | GSM4626767 | Normal |
| GSM4626767_CAACCTCGTCGCATAT-1  | GSM4626767 | Normal |
| GSM4626767_CAACCTCTCAGTTAGC-1  | GSM4626767 | Normal |
| GSM4626767_CAACCTCTCCGGGTGT-1  | GSM4626767 | Normal |
| GSM4626767_CAACCTCTCCTGCTTG-1  | GSM4626767 | Normal |
| GSM4626767_CAACCTCTCTCGATGA-1  | GSM4626767 | Normal |
| GSM4626767_CAACCTCTCTGATTCT-1  | GSM4626767 | Normal |
| GSM4626767_CAACCTAGCATCGGGTC-1 | GSM4626767 | Normal |
| GSM4626767_CAACCTAGTCATGCATG-1 | GSM4626767 | Normal |
| GSM4626767_CAACCTAGTCATTGCGA-1 | GSM4626767 | Normal |
| GSM4626767_CAAGAAAAGAATTCCC-1  | GSM4626767 | Normal |
| GSM4626767_CAAGAAAAGTTCATGGT-1 | GSM4626767 | Normal |
| GSM4626767_CAAGAAAATCAATAAGG-1 | GSM4626767 | Normal |
| GSM4626767_CAAGAAAATCAGCCTAA-1 | GSM4626767 | Normal |
| GSM4626767_CAAGATCCAGTAAGAT-1  | GSM4626767 | Normal |
| GSM4626767_CAAGATCGTCTAGTGT-1  | GSM4626767 | Normal |
| GSM4626767_CAAGATCTCCTAGAAC-1  | GSM4626767 | Normal |

|                               |            |        |
|-------------------------------|------------|--------|
| GSM4626767_CAAGATCTCGTCTGAA-1 | GSM4626767 | Normal |
| GSM4626767_CAAGGCCAGGCATGGT-1 | GSM4626767 | Normal |
| GSM4626767_CAAGGCCAGTCACGCC-1 | GSM4626767 | Normal |
| GSM4626767_CAAGGCCAGTCCATAC-1 | GSM4626767 | Normal |
| GSM4626767_CAAGGCCAGTGAACAT-1 | GSM4626767 | Normal |
| GSM4626767_CAAGGCCAGTGTGAAT-1 | GSM4626767 | Normal |
| GSM4626767_CAAGGCCACACAGAG-1  | GSM4626767 | Normal |
| GSM4626767_CAAGGCCAGCCAGAA-1  | GSM4626767 | Normal |
| GSM4626767_CAAGGCCGTCTTCAAG-1 | GSM4626767 | Normal |
| GSM4626767_CAAGTTGAGGTCATCT-1 | GSM4626767 | Normal |
| GSM4626767_CAAGTTGAGTCTCAAC-1 | GSM4626767 | Normal |
| GSM4626767_CAAGTTGAGTGTACCT-1 | GSM4626767 | Normal |
| GSM4626767_CAAGTTGCAATAACGA-1 | GSM4626767 | Normal |
| GSM4626767_CAAGTTGCAGCCTATA-1 | GSM4626767 | Normal |
| GSM4626767_CAAGTTGCAGCTCGAC-1 | GSM4626767 | Normal |
| GSM4626767_CAAGTTGCAGTGAGTG-1 | GSM4626767 | Normal |
| GSM4626767_CAAGTTGGTCGACTAT-1 | GSM4626767 | Normal |
| GSM4626767_CAAGTTGTCCTCGCAT-1 | GSM4626767 | Normal |
| GSM4626767_CAAGTTGTCGGAATCT-1 | GSM4626767 | Normal |
| GSM4626767_CACAAACAGAGACTAT-1 | GSM4626767 | Normal |
| GSM4626767_CACAAACAGGGTCGAT-1 | GSM4626767 | Normal |
| GSM4626767_CACAAACCAAGTTTC-1  | GSM4626767 | Normal |
| GSM4626767_CACAAACCACCCAGTG-1 | GSM4626767 | Normal |
| GSM4626767_CACAAACGTACCATCA-1 | GSM4626767 | Normal |
| GSM4626767_CACAAACGTTGTTTGG-1 | GSM4626767 | Normal |
| GSM4626767_CACAAACGTTTGTGG-1  | GSM4626767 | Normal |
| GSM4626767_CACACAAAGCTCCTCT-1 | GSM4626767 | Normal |
| GSM4626767_CACACAAAGTCCATAC-1 | GSM4626767 | Normal |
| GSM4626767_CACACAACACATAACC-1 | GSM4626767 | Normal |
| GSM4626767_CACACAACATCGGACC-1 | GSM4626767 | Normal |
| GSM4626767_CACACAAGTCCCTTGT-1 | GSM4626767 | Normal |
| GSM4626767_CACACAAGTTCAGTAC-1 | GSM4626767 | Normal |
| GSM4626767_CACACAATCAAGCCTA-1 | GSM4626767 | Normal |
| GSM4626767_CACACAATCACTCCTG-1 | GSM4626767 | Normal |
| GSM4626767_CACACCTAGAATTGTG-1 | GSM4626767 | Normal |
| GSM4626767_CACACCTAGAGGGATA-1 | GSM4626767 | Normal |
| GSM4626767_CACACCTAGATGCGAC-1 | GSM4626767 | Normal |
| GSM4626767_CACACCTAGATGTGTA-1 | GSM4626767 | Normal |
| GSM4626767_CACACCTCAGCTCGAC-1 | GSM4626767 | Normal |
| GSM4626767_CACACCTCAGGAACGT-1 | GSM4626767 | Normal |
| GSM4626767_CACACCTGTATAATGG-1 | GSM4626767 | Normal |
| GSM4626767_CACACCTGTGTTGGGA-1 | GSM4626767 | Normal |
| GSM4626767_CACACCTGTTGATGAT-1 | GSM4626767 | Normal |
| GSM4626767_CACACCTTCTATTCA-1  | GSM4626767 | Normal |
| GSM4626767_CACACCTTCTAACCGA-1 | GSM4626767 | Normal |
| GSM4626767_CACACTCAGATCTGAA-1 | GSM4626767 | Normal |
| GSM4626767_CACACTCAGTCATGCT-1 | GSM4626767 | Normal |
| GSM4626767_CACACTCCAAAGGAAG-1 | GSM4626767 | Normal |
| GSM4626767_CACACTCCATAAGACA-1 | GSM4626767 | Normal |
| GSM4626767_CACACTCGTCACTGGC-1 | GSM4626767 | Normal |
| GSM4626767_CACACTCGTGTCCTCT-1 | GSM4626767 | Normal |
| GSM4626767_CACACTCTCCACGCAG-1 | GSM4626767 | Normal |
| GSM4626767_CACACTCTCGGATGTT-1 | GSM4626767 | Normal |
| GSM4626767_CACACTCTCTTGTACT-1 | GSM4626767 | Normal |
| GSM4626767_CACAGGCAGCAATATG-1 | GSM4626767 | Normal |
| GSM4626767_CACAGGCAGGACACCA-1 | GSM4626767 | Normal |
| GSM4626767_CACAGGCAGTGAATTG-1 | GSM4626767 | Normal |

|                                |            |        |
|--------------------------------|------------|--------|
| GSM4626767_CACAGGCCAATAACGA-1  | GSM4626767 | Normal |
| GSM4626767_CACAGGCCACTATCTT-1  | GSM4626767 | Normal |
| GSM4626767_CACAGGCCATACGCCG-1  | GSM4626767 | Normal |
| GSM4626767_CACAGGCGTTACTGAC-1  | GSM4626767 | Normal |
| GSM4626767_CACAGGCGTTGGGACA-1  | GSM4626767 | Normal |
| GSM4626767_CACAGGCTCGGACAAG-1  | GSM4626767 | Normal |
| GSM4626767_CACAGGCTCTGTTTGT-1  | GSM4626767 | Normal |
| GSM4626767_CACAGTAAGTTGTAGA-1  | GSM4626767 | Normal |
| GSM4626767_CACAGTACAACAACCT-1  | GSM4626767 | Normal |
| GSM4626767_CACAGTACATATACGC-1  | GSM4626767 | Normal |
| GSM4626767_CACAGTAGTCCAAGTT-1  | GSM4626767 | Normal |
| GSM4626767_CACATAGAGAGCTATA-1  | GSM4626767 | Normal |
| GSM4626767_CACATAGCAGGCTCAC-1  | GSM4626767 | Normal |
| GSM4626767_CACATAGCAGTAAGCG-1  | GSM4626767 | Normal |
| GSM4626767_CACATAGCAGTGACAG-1  | GSM4626767 | Normal |
| GSM4626767_CACATAGCATGCCCGA-1  | GSM4626767 | Normal |
| GSM4626767_CACATAGGTCAGAGGT-1  | GSM4626767 | Normal |
| GSM4626767_CACATAGGTTACCTC-1   | GSM4626767 | Normal |
| GSM4626767_CACATAGTCAAGGCTT-1  | GSM4626767 | Normal |
| GSM4626767_CACATAGTCAGTCCCT-1  | GSM4626767 | Normal |
| GSM4626767_CACATAGTCTCCAGGG-1  | GSM4626767 | Normal |
| GSM4626767_CACATTTACCTCGTT-1   | GSM4626767 | Normal |
| GSM4626767_CACATTTCAGCATGAG-1  | GSM4626767 | Normal |
| GSM4626767_CACATTTGTATAGGTA-1  | GSM4626767 | Normal |
| GSM4626767_CACATTTGTTCGAGATG-1 | GSM4626767 | Normal |
| GSM4626767_CACATTTGTCTGGTCG-1  | GSM4626767 | Normal |
| GSM4626767_CACATTTGTGTGGTTT-1  | GSM4626767 | Normal |
| GSM4626767_CACATTTGTTACCGAT-1  | GSM4626767 | Normal |
| GSM4626767_CACATTTGTTTCATGGT-1 | GSM4626767 | Normal |
| GSM4626767_CACATTTTCAGGTAAA-1  | GSM4626767 | Normal |
| GSM4626767_CACATTTTCCGTCAA-1   | GSM4626767 | Normal |
| GSM4626767_CACCACTAGTATTGGA-1  | GSM4626767 | Normal |
| GSM4626767_CACCACTCAAGGACAC-1  | GSM4626767 | Normal |
| GSM4626767_CACCACTCACTAGTAC-1  | GSM4626767 | Normal |
| GSM4626767_CACCACTGTCCCTACT-1  | GSM4626767 | Normal |
| GSM4626767_CACCACTGTCTTGATG-1  | GSM4626767 | Normal |
| GSM4626767_CACCACTTACCAGGC-1   | GSM4626767 | Normal |
| GSM4626767_CACCACTTCTGTTGAG-1  | GSM4626767 | Normal |
| GSM4626767_CACCAGGAGTGAAGTT-1  | GSM4626767 | Normal |
| GSM4626767_CACCAGGCAACGCACC-1  | GSM4626767 | Normal |
| GSM4626767_CACCAGGCACCCATTC-1  | GSM4626767 | Normal |
| GSM4626767_CACCAGGGTACGCTGC-1  | GSM4626767 | Normal |
| GSM4626767_CACCAGGGTCCAGTAT-1  | GSM4626767 | Normal |
| GSM4626767_CACCAGGTCATAAAGG-1  | GSM4626767 | Normal |
| GSM4626767_CACCAGGTCCCAACGG-1  | GSM4626767 | Normal |
| GSM4626767_CACCAGGTCCTCAACC-1  | GSM4626767 | Normal |
| GSM4626767_CACCTTGAGAACAAC-1   | GSM4626767 | Normal |
| GSM4626767_CACCTTGACCCAGTG-1   | GSM4626767 | Normal |
| GSM4626767_CACCTTGACCGTTGG-1   | GSM4626767 | Normal |
| GSM4626767_CACCTTGGTGATAAAC-1  | GSM4626767 | Normal |
| GSM4626767_CACCTTGGTTTAGGAA-1  | GSM4626767 | Normal |
| GSM4626767_CACCTTGTCCATCACCC-1 | GSM4626767 | Normal |
| GSM4626767_CACCTTGTCCATGCTC-1  | GSM4626767 | Normal |
| GSM4626767_CACCTTGTCCGAATGT-1  | GSM4626767 | Normal |
| GSM4626767_CACCTTGTCTTATCTG-1  | GSM4626767 | Normal |
| GSM4626767_CACTCCAAGAGGTTAT-1  | GSM4626767 | Normal |
| GSM4626767_CACTCCACATCACGTA-1  | GSM4626767 | Normal |

|                                |            |        |
|--------------------------------|------------|--------|
| GSM4626767_CACTCCAGTACAAGTA-1  | GSM4626767 | Normal |
| GSM4626767_CACTCCAGTACCGTTA-1  | GSM4626767 | Normal |
| GSM4626767_CACTCCAGTTACGCGC-1  | GSM4626767 | Normal |
| GSM4626767_CAGAATCAGCAGGTCA-1  | GSM4626767 | Normal |
| GSM4626767_CAGAATCAGGATGGTC-1  | GSM4626767 | Normal |
| GSM4626767_CAGAATCAGGTGGGTT-1  | GSM4626767 | Normal |
| GSM4626767_CAGAATCAGTGTTGAA-1  | GSM4626767 | Normal |
| GSM4626767_CAGAATCAGTTAGCGG-1  | GSM4626767 | Normal |
| GSM4626767_CAGAATCGTACCTACA-1  | GSM4626767 | Normal |
| GSM4626767_CAGAATCTCAATCACG-1  | GSM4626767 | Normal |
| GSM4626767_CAGAATCTCGACCAGC-1  | GSM4626767 | Normal |
| GSM4626767_CAGAATCTCGTAGGTT-1  | GSM4626767 | Normal |
| GSM4626767_CAGAGAGAGCAATATG-1  | GSM4626767 | Normal |
| GSM4626767_CAGAGAGAGCTATGCT-1  | GSM4626767 | Normal |
| GSM4626767_CAGAGAGCATCACAAAC-1 | GSM4626767 | Normal |
| GSM4626767_CAGAGAGGTAATAGCA-1  | GSM4626767 | Normal |
| GSM4626767_CAGAGAGGTATGCTTG-1  | GSM4626767 | Normal |
| GSM4626767_CAGAGAGTCTAACTGG-1  | GSM4626767 | Normal |
| GSM4626767_CAGATCAAGGCAAAGA-1  | GSM4626767 | Normal |
| GSM4626767_CAGATCACACCAGGTC-1  | GSM4626767 | Normal |
| GSM4626767_CAGATCACATGAGCGA-1  | GSM4626767 | Normal |
| GSM4626767_CAGATCACATGCTGGC-1  | GSM4626767 | Normal |
| GSM4626767_CAGATCACATTCTTAC-1  | GSM4626767 | Normal |
| GSM4626767_CAGATCAGTTCATGGT-1  | GSM4626767 | Normal |
| GSM4626767_CAGATCAGTTCGTTGA-1  | GSM4626767 | Normal |
| GSM4626767_CAGATCATCCACGCAG-1  | GSM4626767 | Normal |
| GSM4626767_CAGCAGCAGAAGCCCA-1  | GSM4626767 | Normal |
| GSM4626767_CAGCAGCCACGGTTTA-1  | GSM4626767 | Normal |
| GSM4626767_CAGCAGCCAGACGCCT-1  | GSM4626767 | Normal |
| GSM4626767_CAGCAGCGTAAATGAC-1  | GSM4626767 | Normal |
| GSM4626767_CAGCAGCGTAATCGTC-1  | GSM4626767 | Normal |
| GSM4626767_CAGCAGCGTACCCAAT-1  | GSM4626767 | Normal |
| GSM4626767_CAGCAGCGTGGTCTCG-1  | GSM4626767 | Normal |
| GSM4626767_CAGCAGCTCACGACTA-1  | GSM4626767 | Normal |
| GSM4626767_CAGCAGCTCAGCGATT-1  | GSM4626767 | Normal |
| GSM4626767_CAGCAGCTCTGCGACG-1  | GSM4626767 | Normal |
| GSM4626767_CAGCATAAGACTAGAT-1  | GSM4626767 | Normal |
| GSM4626767_CAGCATAAGTAATCCC-1  | GSM4626767 | Normal |
| GSM4626767_CAGCATAACACGATT-1   | GSM4626767 | Normal |
| GSM4626767_CAGCATAATCCCATC-1   | GSM4626767 | Normal |
| GSM4626767_CAGCATAGTCCGTTAA-1  | GSM4626767 | Normal |
| GSM4626767_CAGCATATCCACGAAT-1  | GSM4626767 | Normal |
| GSM4626767_CAGCATATCCTGCAGG-1  | GSM4626767 | Normal |
| GSM4626767_CAGCCGAAGGATGCGT-1  | GSM4626767 | Normal |
| GSM4626767_CAGCCGAAGTCTCGGC-1  | GSM4626767 | Normal |
| GSM4626767_CAGCCGAAGTTGCAGG-1  | GSM4626767 | Normal |
| GSM4626767_CAGCCGACAGCCTTTC-1  | GSM4626767 | Normal |
| GSM4626767_CAGCCGACAGGATTGG-1  | GSM4626767 | Normal |
| GSM4626767_CAGCCGAGTAGTGAAT-1  | GSM4626767 | Normal |
| GSM4626767_CAGCCGATCCTTGACC-1  | GSM4626767 | Normal |
| GSM4626767_CAGCCGATCGGCTACG-1  | GSM4626767 | Normal |
| GSM4626767_CAGCGACAGCATGGCA-1  | GSM4626767 | Normal |
| GSM4626767_CAGCGACACCCATTC-1   | GSM4626767 | Normal |
| GSM4626767_CAGCGACGTAACGTTC-1  | GSM4626767 | Normal |
| GSM4626767_CAGCGACGTCCGAAGA-1  | GSM4626767 | Normal |
| GSM4626767_CAGCGACGTGTGGCTC-1  | GSM4626767 | Normal |
| GSM4626767_CAGCGACTCAGTTAGC-1  | GSM4626767 | Normal |

|                               |            |        |
|-------------------------------|------------|--------|
| GSM4626767_CAGCGACTCCAAGCCG-1 | GSM4626767 | Normal |
| GSM4626767_CAGCGACTCCGCGGTA-1 | GSM4626767 | Normal |
| GSM4626767_CAGCGACTCCTACAGA-1 | GSM4626767 | Normal |
| GSM4626767_CAGCGACTCCTCATTA-1 | GSM4626767 | Normal |
| GSM4626767_CAGCGACTCCTCCTAG-1 | GSM4626767 | Normal |
| GSM4626767_CAGCGACTCTGTCCGT-1 | GSM4626767 | Normal |
| GSM4626767_CAGCTAAAGCAGATCG-1 | GSM4626767 | Normal |
| GSM4626767_CAGCTAAAGCGTGTCC-1 | GSM4626767 | Normal |
| GSM4626767_CAGCTAAAGCTACCGC-1 | GSM4626767 | Normal |
| GSM4626767_CAGCTAAAGCTGTCTA-1 | GSM4626767 | Normal |
| GSM4626767_CAGCTAACATATGAGA-1 | GSM4626767 | Normal |
| GSM4626767_CAGCTAAGTAGCGATG-1 | GSM4626767 | Normal |
| GSM4626767_CAGCTAAGTCTCAACA-1 | GSM4626767 | Normal |
| GSM4626767_CAGCTAAGTTGGACCC-1 | GSM4626767 | Normal |
| GSM4626767_CAGCTAAGTTTACTCT-1 | GSM4626767 | Normal |
| GSM4626767_CAGCTAATCAGTTCGA-1 | GSM4626767 | Normal |
| GSM4626767_CAGCTAATCCACTGGG-1 | GSM4626767 | Normal |
| GSM4626767_CAGCTGGAGCTCCTTC-1 | GSM4626767 | Normal |
| GSM4626767_CAGCTGGCAAAGCGGT-1 | GSM4626767 | Normal |
| GSM4626767_CAGCTGGCAGATAATG-1 | GSM4626767 | Normal |
| GSM4626767_CAGCTGGCAGGACGTA-1 | GSM4626767 | Normal |
| GSM4626767_CAGCTGGCAGGGATTG-1 | GSM4626767 | Normal |
| GSM4626767_CAGCTGGCATTACGAC-1 | GSM4626767 | Normal |
| GSM4626767_CAGCTGGTCAGGATCT-1 | GSM4626767 | Normal |
| GSM4626767_CAGCTGGTCTAACCGA-1 | GSM4626767 | Normal |
| GSM4626767_CAGGTGCCACAACGCC-1 | GSM4626767 | Normal |
| GSM4626767_CAGGTGCCAGCTGGCT-1 | GSM4626767 | Normal |
| GSM4626767_CAGGTGCCATTCTGC-1  | GSM4626767 | Normal |
| GSM4626767_CAGGTGCGTACGACCC-1 | GSM4626767 | Normal |
| GSM4626767_CAGGTGCGTGTGACCC-1 | GSM4626767 | Normal |
| GSM4626767_CAGGTGCTCGTAGATC-1 | GSM4626767 | Normal |
| GSM4626767_CAGGTGCTCTAGAGTC-1 | GSM4626767 | Normal |
| GSM4626767_CAGTAACAGCAGGTCA-1 | GSM4626767 | Normal |
| GSM4626767_CAGTAACCAGGTTTCA-1 | GSM4626767 | Normal |
| GSM4626767_CAGTAACTCCAAGTAC-1 | GSM4626767 | Normal |
| GSM4626767_CAGTCCTAGACGCTTT-1 | GSM4626767 | Normal |
| GSM4626767_CAGTCCTCAGCGAACA-1 | GSM4626767 | Normal |
| GSM4626767_CAGTCCTGTGGAAGA-1  | GSM4626767 | Normal |
| GSM4626767_CAGTCCTGTGGCCCTA-1 | GSM4626767 | Normal |
| GSM4626767_CAGTCCTTCCCTAATT-1 | GSM4626767 | Normal |
| GSM4626767_CATATGGCAAAGTGCG-1 | GSM4626767 | Normal |
| GSM4626767_CATATGGGTAAGTAGT-1 | GSM4626767 | Normal |
| GSM4626767_CATATGGGTCAGCTAT-1 | GSM4626767 | Normal |
| GSM4626767_CATATGGGTTATCCGA-1 | GSM4626767 | Normal |
| GSM4626767_CATATGGTCTCGCTTG-1 | GSM4626767 | Normal |
| GSM4626767_CATATTCAGGAGCGAG-1 | GSM4626767 | Normal |
| GSM4626767_CATATTCACGCTTTC-1  | GSM4626767 | Normal |
| GSM4626767_CATATTCGTACATGTC-1 | GSM4626767 | Normal |
| GSM4626767_CATATTCGTGAGGCTA-1 | GSM4626767 | Normal |
| GSM4626767_CATATTCGTTTCCACC-1 | GSM4626767 | Normal |
| GSM4626767_CATATTCCTCTAGTGA-1 | GSM4626767 | Normal |
| GSM4626767_CATCAAGAGAATGTGT-1 | GSM4626767 | Normal |
| GSM4626767_CATCAAGAGACTTTCG-1 | GSM4626767 | Normal |
| GSM4626767_CATCAAGAGATGGGTC-1 | GSM4626767 | Normal |
| GSM4626767_CATCAAGAGATGTGTA-1 | GSM4626767 | Normal |
| GSM4626767_CATCAAGAGTCATCCA-1 | GSM4626767 | Normal |
| GSM4626767_CATCAAGAGTGTTAGA-1 | GSM4626767 | Normal |

|                                |            |        |
|--------------------------------|------------|--------|
| GSM4626767_CATCAAGCAATAGAGT-1  | GSM4626767 | Normal |
| GSM4626767_CATCAAGGTAACGACG-1  | GSM4626767 | Normal |
| GSM4626767_CATCAAGGTAACGTTT-1  | GSM4626767 | Normal |
| GSM4626767_CATCAAGGTGCAACGA-1  | GSM4626767 | Normal |
| GSM4626767_CATCAAGTCATGTAGC-1  | GSM4626767 | Normal |
| GSM4626767_CATCAAGTCGGTGTCCG-1 | GSM4626767 | Normal |
| GSM4626767_CATCAAGTCTACCAGA-1  | GSM4626767 | Normal |
| GSM4626767_CATCAGAAGATCACGG-1  | GSM4626767 | Normal |
| GSM4626767_CATCAGACAATGGAGC-1  | GSM4626767 | Normal |
| GSM4626767_CATCAGACAGGATTGG-1  | GSM4626767 | Normal |
| GSM4626767_CATCAGACATGATCCA-1  | GSM4626767 | Normal |
| GSM4626767_CATCAGACATTCTCCG-1  | GSM4626767 | Normal |
| GSM4626767_CATCAGAGTATTAGCC-1  | GSM4626767 | Normal |
| GSM4626767_CATCAGAGTCATATCG-1  | GSM4626767 | Normal |
| GSM4626767_CATCAGAGTGCGATAG-1  | GSM4626767 | Normal |
| GSM4626767_CATCAGATCAACACTG-1  | GSM4626767 | Normal |
| GSM4626767_CATCAGATCTTCATGT-1  | GSM4626767 | Normal |
| GSM4626767_CATCAGATCTTGTCAT-1  | GSM4626767 | Normal |
| GSM4626767_CATCCACAGAATTGTG-1  | GSM4626767 | Normal |
| GSM4626767_CATCCACAGGGTTCGAT-1 | GSM4626767 | Normal |
| GSM4626767_CATCCACAGGGTCTCC-1  | GSM4626767 | Normal |
| GSM4626767_CATCCACCAAGTCATC-1  | GSM4626767 | Normal |
| GSM4626767_CATCCACGTAGCTAAA-1  | GSM4626767 | Normal |
| GSM4626767_CATCCACGTGAGCGAT-1  | GSM4626767 | Normal |
| GSM4626767_CATCCACTCAAACAAG-1  | GSM4626767 | Normal |
| GSM4626767_CATCCACTCAACACTG-1  | GSM4626767 | Normal |
| GSM4626767_CATCCACTCCTCCTAG-1  | GSM4626767 | Normal |
| GSM4626767_CATCCACTCGAGAGCA-1  | GSM4626767 | Normal |
| GSM4626767_CATCCACTCTTAACCT-1  | GSM4626767 | Normal |
| GSM4626767_CATCGAAAGCCACTAT-1  | GSM4626767 | Normal |
| GSM4626767_CATCGAAAGGTGCTAG-1  | GSM4626767 | Normal |
| GSM4626767_CATCGAACAAATGACCT-1 | GSM4626767 | Normal |
| GSM4626767_CATCGAACACAAGTAA-1  | GSM4626767 | Normal |
| GSM4626767_CATCGAATCTGGGCA-1   | GSM4626767 | Normal |
| GSM4626767_CATCGAATCTTGCAAT-1  | GSM4626767 | Normal |
| GSM4626767_CATCGGGAGATATGCA-1  | GSM4626767 | Normal |
| GSM4626767_CATCGGGAGCCATCGC-1  | GSM4626767 | Normal |
| GSM4626767_CATCGGGCACGGTAGA-1  | GSM4626767 | Normal |
| GSM4626767_CATCGGGGTATCACCA-1  | GSM4626767 | Normal |
| GSM4626767_CATCGGGGTGTAACGG-1  | GSM4626767 | Normal |
| GSM4626767_CATCGGGGTTGAACTC-1  | GSM4626767 | Normal |
| GSM4626767_CATCGGGTCATGTCCC-1  | GSM4626767 | Normal |
| GSM4626767_CATGACAAGATATGCA-1  | GSM4626767 | Normal |
| GSM4626767_CATGACAAGTAAGTAC-1  | GSM4626767 | Normal |
| GSM4626767_CATGACAAGTGGGATC-1  | GSM4626767 | Normal |
| GSM4626767_CATGACATCGTACGGC-1  | GSM4626767 | Normal |
| GSM4626767_CATGCCTCATTAGCCA-1  | GSM4626767 | Normal |
| GSM4626767_CATGCCTGTCCCATG-1   | GSM4626767 | Normal |
| GSM4626767_CATGCCTTCAAGATCC-1  | GSM4626767 | Normal |
| GSM4626767_CATGCCTTCATCTGCC-1  | GSM4626767 | Normal |
| GSM4626767_CATGCCTTCGAACTGT-1  | GSM4626767 | Normal |
| GSM4626767_CATGCCTTCGGCTACG-1  | GSM4626767 | Normal |
| GSM4626767_CATGCCTTCGTTTATC-1  | GSM4626767 | Normal |
| GSM4626767_CATGGCGCAAGTTGTC-1  | GSM4626767 | Normal |
| GSM4626767_CATGGCGGTACCATCA-1  | GSM4626767 | Normal |
| GSM4626767_CATGGCGTCAGCTGGC-1  | GSM4626767 | Normal |
| GSM4626767_CATTATCAGACCCACC-1  | GSM4626767 | Normal |

|                                |            |        |
|--------------------------------|------------|--------|
| GSM4626767_CATTATCAGAGACTAT-1  | GSM4626767 | Normal |
| GSM4626767_CATTATCAGCGTAATA-1  | GSM4626767 | Normal |
| GSM4626767_CATTATCAGCGTAGTG-1  | GSM4626767 | Normal |
| GSM4626767_CATTATCAGCTAAGAT-1  | GSM4626767 | Normal |
| GSM4626767_CATTATCAGCTTCGCG-1  | GSM4626767 | Normal |
| GSM4626767_CATTATCCAAACTGCT-1  | GSM4626767 | Normal |
| GSM4626767_CATTATCCAACACGCC-1  | GSM4626767 | Normal |
| GSM4626767_CATTATCCAAGCCCAC-1  | GSM4626767 | Normal |
| GSM4626767_CATTATCCACAGATTC-1  | GSM4626767 | Normal |
| GSM4626767_CATTATCCACATCCAA-1  | GSM4626767 | Normal |
| GSM4626767_CATTATCCACGTAAGG-1  | GSM4626767 | Normal |
| GSM4626767_CATTATCTCAATCACG-1  | GSM4626767 | Normal |
| GSM4626767_CATTATCTCGCGTTTC-1  | GSM4626767 | Normal |
| GSM4626767_CATTATCTCTTCCTTC-1  | GSM4626767 | Normal |
| GSM4626767_CATTTCGAGAGTGAGA-1  | GSM4626767 | Normal |
| GSM4626767_CATTTCGAGCACCGTC-1  | GSM4626767 | Normal |
| GSM4626767_CATTTCGAGCCGGTAA-1  | GSM4626767 | Normal |
| GSM4626767_CATTTCGAGGCTACGA-1  | GSM4626767 | Normal |
| GSM4626767_CATTTCGAGTGCCAGA-1  | GSM4626767 | Normal |
| GSM4626767_CATTTCGCCACCGGAAA-1 | GSM4626767 | Normal |
| GSM4626767_CATTTCGCGTCAGCTAT-1 | GSM4626767 | Normal |
| GSM4626767_CATTTCGCGTTGAGGTG-1 | GSM4626767 | Normal |
| GSM4626767_CATTTCGCTCCGTTGTC-1 | GSM4626767 | Normal |
| GSM4626767_CCAATCCAGCTAGTCT-1  | GSM4626767 | Normal |
| GSM4626767_CCAATCCCACACCGAC-1  | GSM4626767 | Normal |
| GSM4626767_CCAATCCCACGCGAAA-1  | GSM4626767 | Normal |
| GSM4626767_CCAATCCGTACAGACG-1  | GSM4626767 | Normal |
| GSM4626767_CCAATCCGTACGCTGC-1  | GSM4626767 | Normal |
| GSM4626767_CCAATCCGTTACGGC-1   | GSM4626767 | Normal |
| GSM4626767_CCAATCCTCACCTCGT-1  | GSM4626767 | Normal |
| GSM4626767_CCAATCCTCCGGGTGT-1  | GSM4626767 | Normal |
| GSM4626767_CCAATCCTCGTTACAG-1  | GSM4626767 | Normal |
| GSM4626767_CCAATCCTCTCTTATG-1  | GSM4626767 | Normal |
| GSM4626767_CCAATCCTCTGTGCAA-1  | GSM4626767 | Normal |
| GSM4626767_CCACCTAAGAGCTGCA-1  | GSM4626767 | Normal |
| GSM4626767_CCACCTACAATCCAAC-1  | GSM4626767 | Normal |
| GSM4626767_CCACCTACAGTCGTGC-1  | GSM4626767 | Normal |
| GSM4626767_CCACCTACATTAACCG-1  | GSM4626767 | Normal |
| GSM4626767_CCACCTACATTACCTT-1  | GSM4626767 | Normal |
| GSM4626767_CCACCTAGTGTGCGTC-1  | GSM4626767 | Normal |
| GSM4626767_CCACCTAGTTCGGGCT-1  | GSM4626767 | Normal |
| GSM4626767_CCACCTATCCATTAT-1   | GSM4626767 | Normal |
| GSM4626767_CCACGGAAGCGATCCC-1  | GSM4626767 | Normal |
| GSM4626767_CCACGGAAGCTAACTC-1  | GSM4626767 | Normal |
| GSM4626767_CCACGGACATCCCATC-1  | GSM4626767 | Normal |
| GSM4626767_CCACGGACATTACCTT-1  | GSM4626767 | Normal |
| GSM4626767_CCACGGAGTGCTCTTC-1  | GSM4626767 | Normal |
| GSM4626767_CCACGGATCTATCGCC-1  | GSM4626767 | Normal |
| GSM4626767_CCACTACAGCGATTCT-1  | GSM4626767 | Normal |
| GSM4626767_CCACTACCAAGTAGTA-1  | GSM4626767 | Normal |
| GSM4626767_CCACTACCAGGTGGAT-1  | GSM4626767 | Normal |
| GSM4626767_CCACTACCATTAACCG-1  | GSM4626767 | Normal |
| GSM4626767_CCACTACGTAAGTAGT-1  | GSM4626767 | Normal |
| GSM4626767_CCACTACGTAGCGTAG-1  | GSM4626767 | Normal |
| GSM4626767_CCACTACTCAACCAAC-1  | GSM4626767 | Normal |
| GSM4626767_CCACTACTCATCATTC-1  | GSM4626767 | Normal |
| GSM4626767_CCACTACTCCAACCAA-1  | GSM4626767 | Normal |

|                                |            |        |
|--------------------------------|------------|--------|
| GSM4626767_CCACTACTCTGGCGAC-1  | GSM4626767 | Normal |
| GSM4626767_CCAGCGAAGACCGGAT-1  | GSM4626767 | Normal |
| GSM4626767_CCAGCGAAGATGCCAG-1  | GSM4626767 | Normal |
| GSM4626767_CCAGCGAAGCATCATC-1  | GSM4626767 | Normal |
| GSM4626767_CCAGCGACAAACCCAT-1  | GSM4626767 | Normal |
| GSM4626767_CCAGCGACAAAGGAAG-1  | GSM4626767 | Normal |
| GSM4626767_CCAGCGACAAAGTCAA-1  | GSM4626767 | Normal |
| GSM4626767_CCAGCGACATCGATGT-1  | GSM4626767 | Normal |
| GSM4626767_CCAGCGAGTCTAGAGG-1  | GSM4626767 | Normal |
| GSM4626767_CCAGCGAGTGGTGTAG-1  | GSM4626767 | Normal |
| GSM4626767_CCAGCGATCCACGACG-1  | GSM4626767 | Normal |
| GSM4626767_CCATGTCAGATCGGGT-1  | GSM4626767 | Normal |
| GSM4626767_CCATGTCAGATCTGAA-1  | GSM4626767 | Normal |
| GSM4626767_CCATGTCAGTTCGATC-1  | GSM4626767 | Normal |
| GSM4626767_CCATGTCCATGTTCGAT-1 | GSM4626767 | Normal |
| GSM4626767_CCATGTCTCATATCGG-1  | GSM4626767 | Normal |
| GSM4626767_CCATGTCTCATCGATG-1  | GSM4626767 | Normal |
| GSM4626767_CCATGTCTCCATGAAC-1  | GSM4626767 | Normal |
| GSM4626767_CCATGTCTCGAACGGA-1  | GSM4626767 | Normal |
| GSM4626767_CCATGTCTCTCATTCA-1  | GSM4626767 | Normal |
| GSM4626767_CCATGTCTCTTGTGTTG-1 | GSM4626767 | Normal |
| GSM4626767_CCATTCGAGACATAAC-1  | GSM4626767 | Normal |
| GSM4626767_CCATTCGAGACTTGAA-1  | GSM4626767 | Normal |
| GSM4626767_CCATTCGAGTTCGATC-1  | GSM4626767 | Normal |
| GSM4626767_CCATTCGCAGGGTTAG-1  | GSM4626767 | Normal |
| GSM4626767_CCATTCGTCAAGAAGT-1  | GSM4626767 | Normal |
| GSM4626767_CCATTCGTATCGATG-1   | GSM4626767 | Normal |
| GSM4626767_CCATTCGTCCGTAGTA-1  | GSM4626767 | Normal |
| GSM4626767_CCATTCGTCTTCATGT-1  | GSM4626767 | Normal |
| GSM4626767_CCCAATCAGACTGGGT-1  | GSM4626767 | Normal |
| GSM4626767_CCCAATCAGGGCTTGA-1  | GSM4626767 | Normal |
| GSM4626767_CCCAATCGTAACGACG-1  | GSM4626767 | Normal |
| GSM4626767_CCCAATCGTGAGGCTA-1  | GSM4626767 | Normal |
| GSM4626767_CCCAATCTCAGTCAGT-1  | GSM4626767 | Normal |
| GSM4626767_CCCAATCTCAGTGCAT-1  | GSM4626767 | Normal |
| GSM4626767_CCCAATCTCGGCATCG-1  | GSM4626767 | Normal |
| GSM4626767_CCCAATCTCTCTTGAT-1  | GSM4626767 | Normal |
| GSM4626767_CCCAGTTAGAGTACCG-1  | GSM4626767 | Normal |
| GSM4626767_CCCAGTTAGTGCCAGA-1  | GSM4626767 | Normal |
| GSM4626767_CCCAGTTCAAGCCGTC-1  | GSM4626767 | Normal |
| GSM4626767_CCCAGTTCAGCGTTCG-1  | GSM4626767 | Normal |
| GSM4626767_CCCAGTTGTATATCCG-1  | GSM4626767 | Normal |
| GSM4626767_CCCAGTTGTGTCGCTG-1  | GSM4626767 | Normal |
| GSM4626767_CCCAGTTTCAGCATGT-1  | GSM4626767 | Normal |
| GSM4626767_CCCAGTTTCTCGTATT-1  | GSM4626767 | Normal |
| GSM4626767_CCCATACAGGGTCTCC-1  | GSM4626767 | Normal |
| GSM4626767_CCCATACAGGTCGGAT-1  | GSM4626767 | Normal |
| GSM4626767_CCCATACAGTTCCACA-1  | GSM4626767 | Normal |
| GSM4626767_CCCATACGTATAGGGC-1  | GSM4626767 | Normal |
| GSM4626767_CCCATACGTCTAACGT-1  | GSM4626767 | Normal |
| GSM4626767_CCCATACGTGCTTCTC-1  | GSM4626767 | Normal |
| GSM4626767_CCCATACGTTCTGTTT-1  | GSM4626767 | Normal |
| GSM4626767_CCCATACTCCAATGGT-1  | GSM4626767 | Normal |
| GSM4626767_CCCATACTCGATAGAA-1  | GSM4626767 | Normal |
| GSM4626767_CCCTCCTAGACATAAC-1  | GSM4626767 | Normal |
| GSM4626767_CCCTCCTCAATAGCGG-1  | GSM4626767 | Normal |
| GSM4626767_CCCTCCTCACTGTTAG-1  | GSM4626767 | Normal |



|                               |            |        |
|-------------------------------|------------|--------|
| GSM4626767_CCCTCCTGTCTTCTCG-1 | GSM4626767 | Normal |
| GSM4626767_CCCTCCTTCATAACCG-1 | GSM4626767 | Normal |
| GSM4626767_CCCTCCTTCGGCGCAT-1 | GSM4626767 | Normal |
| GSM4626767_CCGGGATAGGATTCGG-1 | GSM4626767 | Normal |
| GSM4626767_CCGGGATAGTGTTCGC-1 | GSM4626767 | Normal |
| GSM4626767_CCGGGATGTAGAGTGC-1 | GSM4626767 | Normal |
| GSM4626767_CCGGGATGTGAAAGAG-1 | GSM4626767 | Normal |
| GSM4626767_CCGGGATGTGCCTGGT-1 | GSM4626767 | Normal |
| GSM4626767_CCGGGATTCAGGTA-1   | GSM4626767 | Normal |
| GSM4626767_CCGGGATTCGTAGATC-1 | GSM4626767 | Normal |
| GSM4626767_CCGGTAGAGCATCATC-1 | GSM4626767 | Normal |
| GSM4626767_CCGGTAGCAGCGAACA-1 | GSM4626767 | Normal |
| GSM4626767_CCGGTAGGTCTGATTG-1 | GSM4626767 | Normal |
| GSM4626767_CCGGTAGGTGCGCTTG-1 | GSM4626767 | Normal |
| GSM4626767_CCGGTAGTCACTTCAT-1 | GSM4626767 | Normal |
| GSM4626767_CCGGTAGTCATGGTCA-1 | GSM4626767 | Normal |
| GSM4626767_CCGGTAGTCGGAATA-1  | GSM4626767 | Normal |
| GSM4626767_CCGTACTAGACGCACA-1 | GSM4626767 | Normal |
| GSM4626767_CCGTACTCAGTCAGCC-1 | GSM4626767 | Normal |
| GSM4626767_CCGTACTCATTACGAC-1 | GSM4626767 | Normal |
| GSM4626767_CCGTACTGTACGACCC-1 | GSM4626767 | Normal |
| GSM4626767_CCGTACTGTCTGATTG-1 | GSM4626767 | Normal |
| GSM4626767_CCGTGGAAGCCAGTTT-1 | GSM4626767 | Normal |
| GSM4626767_CCGTGGAAGTGTGGCA-1 | GSM4626767 | Normal |
| GSM4626767_CCGTGACACAGGAGT-1  | GSM4626767 | Normal |
| GSM4626767_CCGTGACATGAACCT-1  | GSM4626767 | Normal |
| GSM4626767_CCGTGACATGCTGGC-1  | GSM4626767 | Normal |
| GSM4626767_CCGTGAGTAAATGTG-1  | GSM4626767 | Normal |
| GSM4626767_CCGTGATCGGATGGA-1  | GSM4626767 | Normal |
| GSM4626767_CCGTTCACAATGGTCT-1 | GSM4626767 | Normal |
| GSM4626767_CCGTTCACATTCATT-1  | GSM4626767 | Normal |
| GSM4626767_CCGTTCAGTCAACTGT-1 | GSM4626767 | Normal |
| GSM4626767_CCGTTCAGTGATGTCT-1 | GSM4626767 | Normal |
| GSM4626767_CCGTTCAGTTCGGCA-1  | GSM4626767 | Normal |
| GSM4626767_CCGTTCATCAGGATCT-1 | GSM4626767 | Normal |
| GSM4626767_CCGTTCATCCAATGGT-1 | GSM4626767 | Normal |
| GSM4626767_CCGTTCATCCAGATCA-1 | GSM4626767 | Normal |
| GSM4626767_CCGTTCATCGCATGGC-1 | GSM4626767 | Normal |
| GSM4626767_CCGTTCATCGCGGTT-1  | GSM4626767 | Normal |
| GSM4626767_CCTAAAGAGAGGTACC-1 | GSM4626767 | Normal |
| GSM4626767_CCTAAAGCACTCGACG-1 | GSM4626767 | Normal |
| GSM4626767_CCTAAAGCAGGCTGAA-1 | GSM4626767 | Normal |
| GSM4626767_CCTAAAGGTATGCTTG-1 | GSM4626767 | Normal |
| GSM4626767_CCTAAAGGTGCGATAT-1 | GSM4626767 | Normal |
| GSM4626767_CCTAAAGGTGCCTGTG-1 | GSM4626767 | Normal |
| GSM4626767_CCTAAAGGTTTGTGTG-1 | GSM4626767 | Normal |
| GSM4626767_CCTAAAGTCAGCAACT-1 | GSM4626767 | Normal |
| GSM4626767_CCTAAAGTCAGTTCGA-1 | GSM4626767 | Normal |
| GSM4626767_CCTAAAGTCTTTAGTC-1 | GSM4626767 | Normal |
| GSM4626767_CCTACACAGAATGTGT-1 | GSM4626767 | Normal |
| GSM4626767_CCTACACAGCCGATTT-1 | GSM4626767 | Normal |
| GSM4626767_CCTACACCACCGGAAA-1 | GSM4626767 | Normal |
| GSM4626767_CCTACACGTAGAAGGA-1 | GSM4626767 | Normal |
| GSM4626767_CCTACACGTTGACGTT-1 | GSM4626767 | Normal |
| GSM4626767_CCTACACGTTTAGGAA-1 | GSM4626767 | Normal |
| GSM4626767_CCTACCAAGCACACAG-1 | GSM4626767 | Normal |
| GSM4626767_CCTACCACACCAGGCT-1 | GSM4626767 | Normal |

|                                |            |        |
|--------------------------------|------------|--------|
| GSM4626767_CCTACCACACGGCTAC-1  | GSM4626767 | Normal |
| GSM4626767_CCTACCAGTAGTACCT-1  | GSM4626767 | Normal |
| GSM4626767_CCTACCAGTTCCACTC-1  | GSM4626767 | Normal |
| GSM4626767_CCTACCAGTTGACGTT-1  | GSM4626767 | Normal |
| GSM4626767_CCTACCATCACCCGAG-1  | GSM4626767 | Normal |
| GSM4626767_CCTACCATCATGCATG-1  | GSM4626767 | Normal |
| GSM4626767_CCTACCATCGTTTATC-1  | GSM4626767 | Normal |
| GSM4626767_CCTAGCTAGGGCATGT-1  | GSM4626767 | Normal |
| GSM4626767_CCTAGCTAGTGGGTTG-1  | GSM4626767 | Normal |
| GSM4626767_CCTAGCTCACCATCCT-1  | GSM4626767 | Normal |
| GSM4626767_CCTAGCTCATCCGTGG-1  | GSM4626767 | Normal |
| GSM4626767_CCTAGCTGTTGTCTTT-1  | GSM4626767 | Normal |
| GSM4626767_CCTAGCTTCATTGCGA-1  | GSM4626767 | Normal |
| GSM4626767_CCTAGCTTCCTATTCA-1  | GSM4626767 | Normal |
| GSM4626767_CCTAGCTTCGAGCCCA-1  | GSM4626767 | Normal |
| GSM4626767_CCTAGCTTCTTGTACT-1  | GSM4626767 | Normal |
| GSM4626767_CCTAGCTTCTTGTGTTG-1 | GSM4626767 | Normal |
| GSM4626767_CCTAGCTTCTTTCCTC-1  | GSM4626767 | Normal |
| GSM4626767_CCTATTAAGAGAGCTC-1  | GSM4626767 | Normal |
| GSM4626767_CCTATTAAGTACGACG-1  | GSM4626767 | Normal |
| GSM4626767_CCTATTACAGGTCCAC-1  | GSM4626767 | Normal |
| GSM4626767_CCTATTAGTAGGACAC-1  | GSM4626767 | Normal |
| GSM4626767_CCTATTAGTCAATACC-1  | GSM4626767 | Normal |
| GSM4626767_CCTATTAGTGCTGTAT-1  | GSM4626767 | Normal |
| GSM4626767_CCTATTAGTGGAACG-1   | GSM4626767 | Normal |
| GSM4626767_CCTATTAGTTATCACG-1  | GSM4626767 | Normal |
| GSM4626767_CCTATTAGTTATGCGT-1  | GSM4626767 | Normal |
| GSM4626767_CCTCAGTCACACAGAG-1  | GSM4626767 | Normal |
| GSM4626767_CCTCAGTCAGCGTTCG-1  | GSM4626767 | Normal |
| GSM4626767_CCTCAGTCAGTATAAG-1  | GSM4626767 | Normal |
| GSM4626767_CCTCAGTGTCGTCTTC-1  | GSM4626767 | Normal |
| GSM4626767_CCTCAGTGTTCCATGA-1  | GSM4626767 | Normal |
| GSM4626767_CCTCTGAAGAATGTTG-1  | GSM4626767 | Normal |
| GSM4626767_CCTCTGAAGTGGGATC-1  | GSM4626767 | Normal |
| GSM4626767_CCTCTGACAAAGTGCG-1  | GSM4626767 | Normal |
| GSM4626767_CCTCTGACATGTAAGA-1  | GSM4626767 | Normal |
| GSM4626767_CCTCTGAGTGTGAATA-1  | GSM4626767 | Normal |
| GSM4626767_CCTCTGATCTCTAAGG-1  | GSM4626767 | Normal |
| GSM4626767_CCTTACGAGAAACGAG-1  | GSM4626767 | Normal |
| GSM4626767_CCTTACGAGAGGTTGC-1  | GSM4626767 | Normal |
| GSM4626767_CCTTACGAGCTTTGGT-1  | GSM4626767 | Normal |
| GSM4626767_CCTTACGAGGAAGTGC-1  | GSM4626767 | Normal |
| GSM4626767_CCTTACGAGGCTAGGT-1  | GSM4626767 | Normal |
| GSM4626767_CCTTACGAGTTTCCTT-1  | GSM4626767 | Normal |
| GSM4626767_CCTTACGCATGTTGAC-1  | GSM4626767 | Normal |
| GSM4626767_CCTTACGGTATATGAG-1  | GSM4626767 | Normal |
| GSM4626767_CCTTACGGTGCCTGGT-1  | GSM4626767 | Normal |
| GSM4626767_CCTTACGGTTCGTGAT-1  | GSM4626767 | Normal |
| GSM4626767_CCTTACGTCACCCTCA-1  | GSM4626767 | Normal |
| GSM4626767_CCTTACGTCGGAATCT-1  | GSM4626767 | Normal |
| GSM4626767_CCTTACGTCTCAAACG-1  | GSM4626767 | Normal |
| GSM4626767_CCTTCCCAGTCAAGCG-1  | GSM4626767 | Normal |
| GSM4626767_CCTTCCCCACAGACTT-1  | GSM4626767 | Normal |
| GSM4626767_CCTTCCCCTCATCCCT-1  | GSM4626767 | Normal |
| GSM4626767_CCTTCCCCTGTCGCG-1   | GSM4626767 | Normal |
| GSM4626767_CCTTCCCCTCACGCATA-1 | GSM4626767 | Normal |
| GSM4626767_CCTTCCCCTCACGCGGT-1 | GSM4626767 | Normal |

|                                |            |        |
|--------------------------------|------------|--------|
| GSM4626767_CCTTCCCTCACTCTTA-1  | GSM4626767 | Normal |
| GSM4626767_CCTTCCCTCCGCTGTT-1  | GSM4626767 | Normal |
| GSM4626767_CCTTCCCTCGTGGACC-1  | GSM4626767 | Normal |
| GSM4626767_CCTTCGAAGCTGTCTA-1  | GSM4626767 | Normal |
| GSM4626767_CCTTCGAAGGAATCGC-1  | GSM4626767 | Normal |
| GSM4626767_CCTTCGAAGTTAGCGG-1  | GSM4626767 | Normal |
| GSM4626767_CCTTCGACACCGCTAG-1  | GSM4626767 | Normal |
| GSM4626767_CCTTCGACAGCTATTG-1  | GSM4626767 | Normal |
| GSM4626767_CCTTCGACAGGGATTG-1  | GSM4626767 | Normal |
| GSM4626767_CCTTCGATCGTCTGAA-1  | GSM4626767 | Normal |
| GSM4626767_CCTTCGATCTGCTTGC-1  | GSM4626767 | Normal |
| GSM4626767_CCTTTCTAGCGCCTCA-1  | GSM4626767 | Normal |
| GSM4626767_CCTTTCTCAATCACAC-1  | GSM4626767 | Normal |
| GSM4626767_CCTTTCTACCAACCG-1   | GSM4626767 | Normal |
| GSM4626767_CCTTTCTCACGTTTC-1   | GSM4626767 | Normal |
| GSM4626767_CCTTTCTGTCAACTGT-1  | GSM4626767 | Normal |
| GSM4626767_CCTTTCTTCTGCCAGG-1  | GSM4626767 | Normal |
| GSM4626767_CCTTTCTTCTGCGACG-1  | GSM4626767 | Normal |
| GSM4626767_CCTTTCTTCTTACCGC-1  | GSM4626767 | Normal |
| GSM4626767_CGAACATAGAGACGAA-1  | GSM4626767 | Normal |
| GSM4626767_CGAACATAGCAATATG-1  | GSM4626767 | Normal |
| GSM4626767_CGAACATAGCCTATGT-1  | GSM4626767 | Normal |
| GSM4626767_CGAACATAGGTCGGAT-1  | GSM4626767 | Normal |
| GSM4626767_CGAACATCAGCTGCAC-1  | GSM4626767 | Normal |
| GSM4626767_CGAACATCAGTTAACC-1  | GSM4626767 | Normal |
| GSM4626767_CGAACATGTCTAAAGA-1  | GSM4626767 | Normal |
| GSM4626767_CGAACATGTTGGGACA-1  | GSM4626767 | Normal |
| GSM4626767_CGAACATTCCACTGGG-1  | GSM4626767 | Normal |
| GSM4626767_CGAACATTCTTATCTG-1  | GSM4626767 | Normal |
| GSM4626767_CGAACATTCTTCATGT-1  | GSM4626767 | Normal |
| GSM4626767_CGAATGTAGCTCCTCT-1  | GSM4626767 | Normal |
| GSM4626767_CGAATGTAGGCAAAGA-1  | GSM4626767 | Normal |
| GSM4626767_CGAATGTAGTTGAGAT-1  | GSM4626767 | Normal |
| GSM4626767_CGAATGTCAAGTAATG-1  | GSM4626767 | Normal |
| GSM4626767_CGAATGTGTAAGGGAA-1  | GSM4626767 | Normal |
| GSM4626767_CGAATGTGTGTCTGAT-1  | GSM4626767 | Normal |
| GSM4626767_CGAATGTGTGTTTGTG-1  | GSM4626767 | Normal |
| GSM4626767_CGAATGTGTTGCTAA-1   | GSM4626767 | Normal |
| GSM4626767_CGAATGTTTCATGGTCA-1 | GSM4626767 | Normal |
| GSM4626767_CGAATGTTCCCTAACC-1  | GSM4626767 | Normal |
| GSM4626767_CGAATGTTCTCGGACG-1  | GSM4626767 | Normal |
| GSM4626767_CGACCTTAGAAGGTGA-1  | GSM4626767 | Normal |
| GSM4626767_CGACCTTCACTTAAGC-1  | GSM4626767 | Normal |
| GSM4626767_CGACCTTCATCGGGTC-1  | GSM4626767 | Normal |
| GSM4626767_CGACCTTGTATGGTTC-1  | GSM4626767 | Normal |
| GSM4626767_CGACCTTGTGTTTCGAT-1 | GSM4626767 | Normal |
| GSM4626767_CGACCTTTCACTTATC-1  | GSM4626767 | Normal |
| GSM4626767_CGACCTTTCTACGAGT-1  | GSM4626767 | Normal |
| GSM4626767_CGACCTTTCTCCAACC-1  | GSM4626767 | Normal |
| GSM4626767_CGACTTCAGAAACGAG-1  | GSM4626767 | Normal |
| GSM4626767_CGACTTCAGCGACGTA-1  | GSM4626767 | Normal |
| GSM4626767_CGACTTCAGTCTCGGC-1  | GSM4626767 | Normal |
| GSM4626767_CGACTTCCATGGAATA-1  | GSM4626767 | Normal |
| GSM4626767_CGACTTCGTATAATGG-1  | GSM4626767 | Normal |
| GSM4626767_CGACTTCGTCTCTTC-1   | GSM4626767 | Normal |
| GSM4626767_CGACTTCTCGTAGGAG-1  | GSM4626767 | Normal |
| GSM4626767_CGACTTCTCTCGCTTG-1  | GSM4626767 | Normal |

|                               |            |        |
|-------------------------------|------------|--------|
| GSM4626767_CGACTTCTCTTTACAC-1 | GSM4626767 | Normal |
| GSM4626767_CGAGAAGAGATGCCTT-1 | GSM4626767 | Normal |
| GSM4626767_CGAGAAGAGGTTCTTA-1 | GSM4626767 | Normal |
| GSM4626767_CGAGAAGAGTACGTAA-1 | GSM4626767 | Normal |
| GSM4626767_CGAGAAGCAACGATGG-1 | GSM4626767 | Normal |
| GSM4626767_CGAGAAGCACGGTTTA-1 | GSM4626767 | Normal |
| GSM4626767_CGAGAAGTCATTATCC-1 | GSM4626767 | Normal |
| GSM4626767_CGAGAAGTCCGCGCAA-1 | GSM4626767 | Normal |
| GSM4626767_CGAGCACAGGAGCGAG-1 | GSM4626767 | Normal |
| GSM4626767_CGAGCACAGGTGCTTT-1 | GSM4626767 | Normal |
| GSM4626767_CGAGCACCAAGTTCT-1  | GSM4626767 | Normal |
| GSM4626767_CGAGCACGTGAGGGTT-1 | GSM4626767 | Normal |
| GSM4626767_CGAGCACGTTCAGCGC-1 | GSM4626767 | Normal |
| GSM4626767_CGAGCACTCAATACCG-1 | GSM4626767 | Normal |
| GSM4626767_CGAGCACTCGCCGTGA-1 | GSM4626767 | Normal |
| GSM4626767_CGAGCCAAGAACAAC-1  | GSM4626767 | Normal |
| GSM4626767_CGAGCCACAATAGAGT-1 | GSM4626767 | Normal |
| GSM4626767_CGAGCCACAGACGCAA-1 | GSM4626767 | Normal |
| GSM4626767_CGAGCCAGTGCGAAAC-1 | GSM4626767 | Normal |
| GSM4626767_CGAGCCAGTGGGTATG-1 | GSM4626767 | Normal |
| GSM4626767_CGAGCCAGTTGCCTCT-1 | GSM4626767 | Normal |
| GSM4626767_CGAGCCATCACCTCGT-1 | GSM4626767 | Normal |
| GSM4626767_CGAGCCATCCAAGTAC-1 | GSM4626767 | Normal |
| GSM4626767_CGAGCCATCCTATTCA-1 | GSM4626767 | Normal |
| GSM4626767_CGATCGGAGAAGGACA-1 | GSM4626767 | Normal |
| GSM4626767_CGATCGGAGACTAGGC-1 | GSM4626767 | Normal |
| GSM4626767_CGATCGGAGAGACGAA-1 | GSM4626767 | Normal |
| GSM4626767_CGATCGGAGGGTGTGT-1 | GSM4626767 | Normal |
| GSM4626767_CGATCGGAGTACGTAA-1 | GSM4626767 | Normal |
| GSM4626767_CGATCGGCAAGTCTGT-1 | GSM4626767 | Normal |
| GSM4626767_CGATCGGCAGCTGGCT-1 | GSM4626767 | Normal |
| GSM4626767_CGATCGGGTCCAGTTA-1 | GSM4626767 | Normal |
| GSM4626767_CGATCGGGTGTTTGTG-1 | GSM4626767 | Normal |
| GSM4626767_CGATCGGTCATGTAGC-1 | GSM4626767 | Normal |
| GSM4626767_CGATCGGTCGTAGGAG-1 | GSM4626767 | Normal |
| GSM4626767_CGATGGCAGATGAGAG-1 | GSM4626767 | Normal |
| GSM4626767_CGATGGCAGGTGTGGT-1 | GSM4626767 | Normal |
| GSM4626767_CGATGGCCACGGCCAT-1 | GSM4626767 | Normal |
| GSM4626767_CGATGGCCAGATTGCT-1 | GSM4626767 | Normal |
| GSM4626767_CGATGGCGTTACGGAG-1 | GSM4626767 | Normal |
| GSM4626767_CGATGGCTCTCGTTTA-1 | GSM4626767 | Normal |
| GSM4626767_CGATGTAAGGACACCA-1 | GSM4626767 | Normal |
| GSM4626767_CGATGTAAGGTGCAAC-1 | GSM4626767 | Normal |
| GSM4626767_CGATGTACATCGGACC-1 | GSM4626767 | Normal |
| GSM4626767_CGATGTAGTCCAGTAT-1 | GSM4626767 | Normal |
| GSM4626767_CGATGTAGTCCGCTGA-1 | GSM4626767 | Normal |
| GSM4626767_CGATGTATCAGCTCGG-1 | GSM4626767 | Normal |
| GSM4626767_CGATGTATCGTTTATC-1 | GSM4626767 | Normal |
| GSM4626767_CGATTGAAGGGCACTA-1 | GSM4626767 | Normal |
| GSM4626767_CGATTGACAAGCGTAG-1 | GSM4626767 | Normal |
| GSM4626767_CGATTGACAGATCTGT-1 | GSM4626767 | Normal |
| GSM4626767_CGATTGACATGTTGAC-1 | GSM4626767 | Normal |
| GSM4626767_CGATTGAGTTTGCGC-1  | GSM4626767 | Normal |
| GSM4626767_CGATTGATCAGTACGT-1 | GSM4626767 | Normal |
| GSM4626767_CGCCAAGAGACCCACC-1 | GSM4626767 | Normal |
| GSM4626767_CGCCAAGGTAGCCTAT-1 | GSM4626767 | Normal |
| GSM4626767_CGCCAAGGTCCGAATT-1 | GSM4626767 | Normal |

|                                |            |        |
|--------------------------------|------------|--------|
| GSM4626767_CGCCAAGGTTCTCTC-1   | GSM4626767 | Normal |
| GSM4626767_CGCCAAGTCACATACG-1  | GSM4626767 | Normal |
| GSM4626767_CGCCAAGTCCGCGCAA-1  | GSM4626767 | Normal |
| GSM4626767_CGCGGTAAGACGCTTT-1  | GSM4626767 | Normal |
| GSM4626767_CGCGGTAAGTCGCCGT-1  | GSM4626767 | Normal |
| GSM4626767_CGCGGTACATCTACGA-1  | GSM4626767 | Normal |
| GSM4626767_CGCGGTACATGAGCGA-1  | GSM4626767 | Normal |
| GSM4626767_CGCGGTACATGCGCAC-1  | GSM4626767 | Normal |
| GSM4626767_CGCGGTAGTACTTGAC-1  | GSM4626767 | Normal |
| GSM4626767_CGCGGTAGTCTGCGGT-1  | GSM4626767 | Normal |
| GSM4626767_CGCGGTAGTTACGTCA-1  | GSM4626767 | Normal |
| GSM4626767_CGCGGTAGTTTGACAC-1  | GSM4626767 | Normal |
| GSM4626767_CGCGGTATCAGTTTGG-1  | GSM4626767 | Normal |
| GSM4626767_CGCGGTATCATGTAGC-1  | GSM4626767 | Normal |
| GSM4626767_CGCGGTATCCTGTACC-1  | GSM4626767 | Normal |
| GSM4626767_CGCGTTTAGAGTGAGA-1  | GSM4626767 | Normal |
| GSM4626767_CGCGTTTAGCCTCGTG-1  | GSM4626767 | Normal |
| GSM4626767_CGCGTTTAGTTCGATC-1  | GSM4626767 | Normal |
| GSM4626767_CGCGTTTCATGAAGTA-1  | GSM4626767 | Normal |
| GSM4626767_CGCGTTTGTACATGTC-1  | GSM4626767 | Normal |
| GSM4626767_CGCTATCGTAATCGTC-1  | GSM4626767 | Normal |
| GSM4626767_CGCTATCGTAGGCATG-1  | GSM4626767 | Normal |
| GSM4626767_CGCTATCGTGAAAT-1    | GSM4626767 | Normal |
| GSM4626767_CGCTATCTCACGCATA-1  | GSM4626767 | Normal |
| GSM4626767_CGCTATCTCTCTGCTG-1  | GSM4626767 | Normal |
| GSM4626767_CGCTATCTCTGCGACG-1  | GSM4626767 | Normal |
| GSM4626767_CGCTGGAAGCCCAATT-1  | GSM4626767 | Normal |
| GSM4626767_CGCTGGACAGTTCATG-1  | GSM4626767 | Normal |
| GSM4626767_CGCTGGAGTCATGCCG-1  | GSM4626767 | Normal |
| GSM4626767_CGCTGGAGTGCGAAAC-1  | GSM4626767 | Normal |
| GSM4626767_CGCTGGAGTTGACGTT-1  | GSM4626767 | Normal |
| GSM4626767_CGCTGGATCACGATGT-1  | GSM4626767 | Normal |
| GSM4626767_CGCTTCAAGAGCCTAG-1  | GSM4626767 | Normal |
| GSM4626767_CGCTTCAAGATAGGAG-1  | GSM4626767 | Normal |
| GSM4626767_CGCTTCACAAGTAATG-1  | GSM4626767 | Normal |
| GSM4626767_CGCTTCACACCCATGG-1  | GSM4626767 | Normal |
| GSM4626767_CGCTTCACAGCGTTCG-1  | GSM4626767 | Normal |
| GSM4626767_CGCTTCAGTACATGTC-1  | GSM4626767 | Normal |
| GSM4626767_CGCTTCATCTGTCTCG-1  | GSM4626767 | Normal |
| GSM4626767_CGGACACCAAGTTAAG-1  | GSM4626767 | Normal |
| GSM4626767_CGGACACGTTGCGCAC-1  | GSM4626767 | Normal |
| GSM4626767_CGGACACTCAGCTGGC-1  | GSM4626767 | Normal |
| GSM4626767_CGGACGTAGACATAAC-1  | GSM4626767 | Normal |
| GSM4626767_CGGACGTTCAATTATCC-1 | GSM4626767 | Normal |
| GSM4626767_CGGACGTTCCACGTGG-1  | GSM4626767 | Normal |
| GSM4626767_CGGACTGAGCAACGGT-1  | GSM4626767 | Normal |
| GSM4626767_CGGACTGCACGTTGGC-1  | GSM4626767 | Normal |
| GSM4626767_CGGACTGCATAACCTG-1  | GSM4626767 | Normal |
| GSM4626767_CGGACTGGTACCGTTA-1  | GSM4626767 | Normal |
| GSM4626767_CGGACTGGTATCTGCA-1  | GSM4626767 | Normal |
| GSM4626767_CGGACTGTCCAAGTAC-1  | GSM4626767 | Normal |
| GSM4626767_CGGAGCTAGCGTTAT-1   | GSM4626767 | Normal |
| GSM4626767_CGGAGCTAGCTGAACG-1  | GSM4626767 | Normal |
| GSM4626767_CGGAGCTCAGTAAGCG-1  | GSM4626767 | Normal |
| GSM4626767_CGGAGCTGTGCAACAG-1  | GSM4626767 | Normal |
| GSM4626767_CGGAGCTGTTACGCGC-1  | GSM4626767 | Normal |
| GSM4626767_CGGAGCTTCACCGGGT-1  | GSM4626767 | Normal |

|                                 |            |        |
|---------------------------------|------------|--------|
| GSM4626767_CGGAGCTTCACGCGGT-1   | GSM4626767 | Normal |
| GSM4626767_CGGAGCTTCCGTCAA-1    | GSM4626767 | Normal |
| GSM4626767_CGGAGTCAGGTGACCA-1   | GSM4626767 | Normal |
| GSM4626767_CGGAGTCCAGGATCGA-1   | GSM4626767 | Normal |
| GSM4626767_CGGAGTCTCACCCGAG-1   | GSM4626767 | Normal |
| GSM4626767_CGGAGTCTCCGGCACA-1   | GSM4626767 | Normal |
| GSM4626767_CGGCTAGAGCCCGAAA-1   | GSM4626767 | Normal |
| GSM4626767_CGGCTAGAGTCACGCC-1   | GSM4626767 | Normal |
| GSM4626767_CGGCTAGCAAAGTGTG-1   | GSM4626767 | Normal |
| GSM4626767_CGGCTAGCAAAGTCAA-1   | GSM4626767 | Normal |
| GSM4626767_CGGCTAGCAGTAACGG-1   | GSM4626767 | Normal |
| GSM4626767_CGGCTAGTCAGTGCAT-1   | GSM4626767 | Normal |
| GSM4626767_CGGCTAGTCCCAACGG-1   | GSM4626767 | Normal |
| GSM4626767_CGGCTAGTCCGGGTGT-1   | GSM4626767 | Normal |
| GSM4626767_CGGCTAGTCTTACCTA-1   | GSM4626767 | Normal |
| GSM4626767_CGGGTCAAGTTAAGTG-1   | GSM4626767 | Normal |
| GSM4626767_CGGGTCACAAAGTCAA-1   | GSM4626767 | Normal |
| GSM4626767_CGGGTCAACAGCGTTCCG-1 | GSM4626767 | Normal |
| GSM4626767_CGGGTCAATCTCCCA-1    | GSM4626767 | Normal |
| GSM4626767_CGGGTCAAGTGTCTGAT-1  | GSM4626767 | Normal |
| GSM4626767_CGGGTCAATCAACCAAC-1  | GSM4626767 | Normal |
| GSM4626767_CGGGTCAATCGTGTAGT-1  | GSM4626767 | Normal |
| GSM4626767_CGGGTCAATCTAGCACA-1  | GSM4626767 | Normal |
| GSM4626767_CGGTTAAAGAGGACGG-1   | GSM4626767 | Normal |
| GSM4626767_CGGTTAAAGCCCAGCT-1   | GSM4626767 | Normal |
| GSM4626767_CGGTTAAAGTTTCGATC-1  | GSM4626767 | Normal |
| GSM4626767_CGGTTAAACATTTTCAGG-1 | GSM4626767 | Normal |
| GSM4626767_CGGTTAAGTACCGCTG-1   | GSM4626767 | Normal |
| GSM4626767_CGGTTAAGTGTTTGGT-1   | GSM4626767 | Normal |
| GSM4626767_CGGTTAAGTTAAGAAC-1   | GSM4626767 | Normal |
| GSM4626767_CGGTTAATCCGTAGGC-1   | GSM4626767 | Normal |
| GSM4626767_CGGTTAATCTGTCTCG-1   | GSM4626767 | Normal |
| GSM4626767_CGTAGCGAGTAGCCGA-1   | GSM4626767 | Normal |
| GSM4626767_CGTAGCGAGTCTCGGC-1   | GSM4626767 | Normal |
| GSM4626767_CGTAGCGCAAGGGTCA-1   | GSM4626767 | Normal |
| GSM4626767_CGTAGCGCAATTGCTG-1   | GSM4626767 | Normal |
| GSM4626767_CGTAGCGCACGGCTAC-1   | GSM4626767 | Normal |
| GSM4626767_CGTAGCGGTAAGAGAG-1   | GSM4626767 | Normal |
| GSM4626767_CGTAGCGGTAGCCTCG-1   | GSM4626767 | Normal |
| GSM4626767_CGTAGCGGTGTTTGTG-1   | GSM4626767 | Normal |
| GSM4626767_CGTAGCGTCTGAGAACG-1  | GSM4626767 | Normal |
| GSM4626767_CGTAGCGTCTGAAATA-1   | GSM4626767 | Normal |
| GSM4626767_CGTAGCGTCTGACCGG-1   | GSM4626767 | Normal |
| GSM4626767_CGTAGGCAGATTACCC-1   | GSM4626767 | Normal |
| GSM4626767_CGTAGGCAGTCACGCC-1   | GSM4626767 | Normal |
| GSM4626767_CGTAGGCAGTTTAGGA-1   | GSM4626767 | Normal |
| GSM4626767_CGTAGGCCAAGGCTCC-1   | GSM4626767 | Normal |
| GSM4626767_CGTAGGCCACAGACAG-1   | GSM4626767 | Normal |
| GSM4626767_CGTAGGCCGTCATCGGC-1  | GSM4626767 | Normal |
| GSM4626767_CGTAGGCCGCTCCACT-1   | GSM4626767 | Normal |
| GSM4626767_CGTAGGCCGTGAAATCA-1  | GSM4626767 | Normal |
| GSM4626767_CGTAGGCTCGGAGGTA-1   | GSM4626767 | Normal |
| GSM4626767_CGTCACTAGGTGACCA-1   | GSM4626767 | Normal |
| GSM4626767_CGTCACTCACATGACT-1   | GSM4626767 | Normal |
| GSM4626767_CGTCACTGTATATGAG-1   | GSM4626767 | Normal |
| GSM4626767_CGTCACTGTTTGAATC-1   | GSM4626767 | Normal |
| GSM4626767_CGTCACTTACCAGGC-1    | GSM4626767 | Normal |

|                               |            |        |
|-------------------------------|------------|--------|
| GSM4626767_CGTCACTTCCCTAACC-1 | GSM4626767 | Normal |
| GSM4626767_CGTCACTTCTGGGCCA-1 | GSM4626767 | Normal |
| GSM4626767_CGTCAGGAGCCCAATT-1 | GSM4626767 | Normal |
| GSM4626767_CGTCAGGAGGCCATAG-1 | GSM4626767 | Normal |
| GSM4626767_CGTCAGGAGTCTCGGC-1 | GSM4626767 | Normal |
| GSM4626767_CGTCAGGCACGACGAA-1 | GSM4626767 | Normal |
| GSM4626767_CGTCAGGCAGTTCATG-1 | GSM4626767 | Normal |
| GSM4626767_CGTCAGGGTCCGAAGA-1 | GSM4626767 | Normal |
| GSM4626767_CGTCAGGTCAAGATCC-1 | GSM4626767 | Normal |
| GSM4626767_CGTCAGGTCAGTGCAT-1 | GSM4626767 | Normal |
| GSM4626767_CGTCCATAGGCTAGGT-1 | GSM4626767 | Normal |
| GSM4626767_CGTCCATAGTAGGTGC-1 | GSM4626767 | Normal |
| GSM4626767_CGTCCATCACGCATCG-1 | GSM4626767 | Normal |
| GSM4626767_CGTCCATCATCCGCGA-1 | GSM4626767 | Normal |
| GSM4626767_CGTCCATGTCTTGATG-1 | GSM4626767 | Normal |
| GSM4626767_CGTCCATGTGCGAAAC-1 | GSM4626767 | Normal |
| GSM4626767_CGTCCATGTGTCAATC-1 | GSM4626767 | Normal |
| GSM4626767_CGTCCATGTTCTCCA-1  | GSM4626767 | Normal |
| GSM4626767_CGTCCATGTTGCGGAC-1 | GSM4626767 | Normal |
| GSM4626767_CGTCCATGTTGGACCC-1 | GSM4626767 | Normal |
| GSM4626767_CGTCCATTCAACACCA-1 | GSM4626767 | Normal |
| GSM4626767_CGTCCATTCCATGCTC-1 | GSM4626767 | Normal |
| GSM4626767_CGTCCATTGCGCGGTT-1 | GSM4626767 | Normal |
| GSM4626767_CGTCCATTGTCACGG-1  | GSM4626767 | Normal |
| GSM4626767_CGTCTACCACAGACAG-1 | GSM4626767 | Normal |
| GSM4626767_CGTCTACGTTAAGAAC-1 | GSM4626767 | Normal |
| GSM4626767_CGTCTACTCATGCAAC-1 | GSM4626767 | Normal |
| GSM4626767_CGTCTACTCTGTCTAT-1 | GSM4626767 | Normal |
| GSM4626767_CGTGAGCAGAATGTGT-1 | GSM4626767 | Normal |
| GSM4626767_CGTGAGCAGGAATGGA-1 | GSM4626767 | Normal |
| GSM4626767_CGTGAGCAGGTACGG-1  | GSM4626767 | Normal |
| GSM4626767_CGTGAGCAGTTGTAGA-1 | GSM4626767 | Normal |
| GSM4626767_CGTGAGCCAGTATCTG-1 | GSM4626767 | Normal |
| GSM4626767_CGTGAGCGTGCTAGCC-1 | GSM4626767 | Normal |
| GSM4626767_CGTGAGCTCATTGCC-1  | GSM4626767 | Normal |
| GSM4626767_CGTGTAAGTGCTGCC-1  | GSM4626767 | Normal |
| GSM4626767_CGTGTAACATCCTAGA-1 | GSM4626767 | Normal |
| GSM4626767_CGTGTAAGTACAGTTC-1 | GSM4626767 | Normal |
| GSM4626767_CGTGTAAGTTACAGAA-1 | GSM4626767 | Normal |
| GSM4626767_CGTGTAATCAACCAAC-1 | GSM4626767 | Normal |
| GSM4626767_CGTGTAATCAACCATG-1 | GSM4626767 | Normal |
| GSM4626767_CGTGTAATCCCTCTTT-1 | GSM4626767 | Normal |
| GSM4626767_CGTGTAATCGTGGAA-1  | GSM4626767 | Normal |
| GSM4626767_CGTGTCTCAATCACAC-1 | GSM4626767 | Normal |
| GSM4626767_CGTGTCTGTGGTCTCG-1 | GSM4626767 | Normal |
| GSM4626767_CGTGTCTTACAGTAC-1  | GSM4626767 | Normal |
| GSM4626767_CGTGTCTTACAGAGTG-1 | GSM4626767 | Normal |
| GSM4626767_CGTGTCTTCGTGGTCG-1 | GSM4626767 | Normal |
| GSM4626767_CGTTAGAGTCTAGTGT-1 | GSM4626767 | Normal |
| GSM4626767_CGTTAGATCGAATGGG-1 | GSM4626767 | Normal |
| GSM4626767_CGTTAGATCGCTAGCG-1 | GSM4626767 | Normal |
| GSM4626767_CGTTAGATCGTCTGAA-1 | GSM4626767 | Normal |
| GSM4626767_CGTTAGATCGTGGTCG-1 | GSM4626767 | Normal |
| GSM4626767_CGTTCTGAGCTTTGGT-1 | GSM4626767 | Normal |
| GSM4626767_CGTTCTGAGTACGCGA-1 | GSM4626767 | Normal |
| GSM4626767_CGTTCTGCAAGTAATG-1 | GSM4626767 | Normal |
| GSM4626767_CGTTCTGCATGAACCT-1 | GSM4626767 | Normal |

|                                 |            |        |
|---------------------------------|------------|--------|
| GSM4626767_CGTTCTGCATGAGCGA-1   | GSM4626767 | Normal |
| GSM4626767_CGTTCTGGTAAACGCG-1   | GSM4626767 | Normal |
| GSM4626767_CGTTCTGGTCAATACC-1   | GSM4626767 | Normal |
| GSM4626767_CGTTCTGGTGTTGAGG-1   | GSM4626767 | Normal |
| GSM4626767_CGTTGGGAGAAGGGTA-1   | GSM4626767 | Normal |
| GSM4626767_CGTTGGGAGTCTCCTC-1   | GSM4626767 | Normal |
| GSM4626767_CGTTGGGGTCAGCTAT-1   | GSM4626767 | Normal |
| GSM4626767_CGTTGGGTCCGTAGGC-1   | GSM4626767 | Normal |
| GSM4626767_CGTTGGGTCCTAGTGA-1   | GSM4626767 | Normal |
| GSM4626767_CTAAC TTCAAGCGCTC-1  | GSM4626767 | Normal |
| GSM4626767_CTAAC TTCAATGGTCT-1  | GSM4626767 | Normal |
| GSM4626767_CTAAC TTGTATAATGG-1  | GSM4626767 | Normal |
| GSM4626767_CTAAC TTGTTTGTTC-1   | GSM4626767 | Normal |
| GSM4626767_CTAAC TTTTCAGCGATT-1 | GSM4626767 | Normal |
| GSM4626767_CTAAGACAGGTGGGTT-1   | GSM4626767 | Normal |
| GSM4626767_CTAAGACCAACGCACC-1   | GSM4626767 | Normal |
| GSM4626767_CTAAGACCATCTGGTA-1   | GSM4626767 | Normal |
| GSM4626767_CTAAGACCATGAACCT-1   | GSM4626767 | Normal |
| GSM4626767_CTAAGACGTA CTTAGC-1  | GSM4626767 | Normal |
| GSM4626767_CTAAGACTCAAACAAG-1   | GSM4626767 | Normal |
| GSM4626767_CTAAGACTCGATCCCT-1   | GSM4626767 | Normal |
| GSM4626767_CTAAGACTCTCAAGTG-1   | GSM4626767 | Normal |
| GSM4626767_CTAATGGCACCAGTTA-1   | GSM4626767 | Normal |
| GSM4626767_CTAATGGCATTGCGGC-1   | GSM4626767 | Normal |
| GSM4626767_CTAATGGGTGCCTGGT-1   | GSM4626767 | Normal |
| GSM4626767_CTAATGGTCACAACGT-1   | GSM4626767 | Normal |
| GSM4626767_CTAATGGTCCTGTAGA-1   | GSM4626767 | Normal |
| GSM4626767_CTACACCAGTAGATGT-1   | GSM4626767 | Normal |
| GSM4626767_CTACACCCACAACGCC-1   | GSM4626767 | Normal |
| GSM4626767_CTACACCCAGTAAGAT-1   | GSM4626767 | Normal |
| GSM4626767_CTACACCCAGTAGAGC-1   | GSM4626767 | Normal |
| GSM4626767_CTACACCGTGCAACAC-1   | GSM4626767 | Normal |
| GSM4626767_CTACACCTCAACGCTA-1   | GSM4626767 | Normal |
| GSM4626767_CTACATTAGAATGTGT-1   | GSM4626767 | Normal |
| GSM4626767_CTACATTAGTCATCCA-1   | GSM4626767 | Normal |
| GSM4626767_CTACATTAGTCCGGTC-1   | GSM4626767 | Normal |
| GSM4626767_CTACATTAGTGGAGAA-1   | GSM4626767 | Normal |
| GSM4626767_CTACATTCAATGGAGC-1   | GSM4626767 | Normal |
| GSM4626767_CTACATTCACGAAGCA-1   | GSM4626767 | Normal |
| GSM4626767_CTACATTCATACTACG-1   | GSM4626767 | Normal |
| GSM4626767_CTACATTGTGCTCTTC-1   | GSM4626767 | Normal |
| GSM4626767_CTACATTTCCATTAT-1    | GSM4626767 | Normal |
| GSM4626767_CTACATTTGCGCCCTTA-1  | GSM4626767 | Normal |
| GSM4626767_CTACATTTGCGCTGTT-1   | GSM4626767 | Normal |
| GSM4626767_CTACCCAAGCGATCCC-1   | GSM4626767 | Normal |
| GSM4626767_CTACCCAAGGCCCTCA-1   | GSM4626767 | Normal |
| GSM4626767_CTACCCACAACACCCG-1   | GSM4626767 | Normal |
| GSM4626767_CTACCCACAACACGCC-1   | GSM4626767 | Normal |
| GSM4626767_CTACCCACATCTGGTA-1   | GSM4626767 | Normal |
| GSM4626767_CTACCCAGTCAGAAGC-1   | GSM4626767 | Normal |
| GSM4626767_CTACCCAGTCTTCGTC-1   | GSM4626767 | Normal |
| GSM4626767_CTACCCATCGGTTCCGG-1  | GSM4626767 | Normal |
| GSM4626767_CTACCCATCGTAGGAG-1   | GSM4626767 | Normal |
| GSM4626767_CTACGTCAGCAGGTCA-1   | GSM4626767 | Normal |
| GSM4626767_CTACGTCAGCGTAGTG-1   | GSM4626767 | Normal |
| GSM4626767_CTACGTCAGCTAGTCT-1   | GSM4626767 | Normal |
| GSM4626767_CTACGTCAGTTCCGCG-1   | GSM4626767 | Normal |



|                                |            |        |
|--------------------------------|------------|--------|
| GSM4626767_CTACGTCGTAGGGACT-1  | GSM4626767 | Normal |
| GSM4626767_CTACGTCGTCCATCCT-1  | GSM4626767 | Normal |
| GSM4626767_CTACGTCGTCTGCCAG-1  | GSM4626767 | Normal |
| GSM4626767_CTACGTCCTCAAGAAGT-1 | GSM4626767 | Normal |
| GSM4626767_CTACGTCCTCAGCTCTC-1 | GSM4626767 | Normal |
| GSM4626767_CTACGTCCTCGGTCCGA-1 | GSM4626767 | Normal |
| GSM4626767_CTACGTCCTCTATCCCG-1 | GSM4626767 | Normal |
| GSM4626767_CTACGTCCTCTCAAACG-1 | GSM4626767 | Normal |
| GSM4626767_CTAGAGTAGATCCCGC-1  | GSM4626767 | Normal |
| GSM4626767_CTAGAGTAGCCCAACC-1  | GSM4626767 | Normal |
| GSM4626767_CTAGAGTAGCGTGAGT-1  | GSM4626767 | Normal |
| GSM4626767_CTAGAGTCACATGACT-1  | GSM4626767 | Normal |
| GSM4626767_CTAGAGTCACCTCGGA-1  | GSM4626767 | Normal |
| GSM4626767_CTAGAGTCACTAAGTC-1  | GSM4626767 | Normal |
| GSM4626767_CTAGAGTCAGACGCAA-1  | GSM4626767 | Normal |
| GSM4626767_CTAGAGTCAGCGTAAG-1  | GSM4626767 | Normal |
| GSM4626767_CTAGAGTCATCCAACA-1  | GSM4626767 | Normal |
| GSM4626767_CTAGAGTCATCCGGGT-1  | GSM4626767 | Normal |
| GSM4626767_CTAGAGTGTAGAAAGG-1  | GSM4626767 | Normal |
| GSM4626767_CTAGAGTTCTCGGACG-1  | GSM4626767 | Normal |
| GSM4626767_CTAGCCTAGGCTAGCA-1  | GSM4626767 | Normal |
| GSM4626767_CTAGCCTCACAGGCCT-1  | GSM4626767 | Normal |
| GSM4626767_CTAGCCTCATATACCG-1  | GSM4626767 | Normal |
| GSM4626767_CTAGCCTGTACATGTC-1  | GSM4626767 | Normal |
| GSM4626767_CTAGTGAAGCTGGAAC-1  | GSM4626767 | Normal |
| GSM4626767_CTAGTGACAATAGCGG-1  | GSM4626767 | Normal |
| GSM4626767_CTAGTGACAGACAGGT-1  | GSM4626767 | Normal |
| GSM4626767_CTAGTGACATTCTTAC-1  | GSM4626767 | Normal |
| GSM4626767_CTAGTGAGTATCGCAT-1  | GSM4626767 | Normal |
| GSM4626767_CTAGTGATCACCGTAA-1  | GSM4626767 | Normal |
| GSM4626767_CTAGTGATCTTCATGT-1  | GSM4626767 | Normal |
| GSM4626767_CTCACACCACTGTCGG-1  | GSM4626767 | Normal |
| GSM4626767_CTCACACGTGTATGGG-1  | GSM4626767 | Normal |
| GSM4626767_CTCACACGTGTGAATA-1  | GSM4626767 | Normal |
| GSM4626767_CTCACACGTTCGGCAC-1  | GSM4626767 | Normal |
| GSM4626767_CTCACACTCAGCTGGC-1  | GSM4626767 | Normal |
| GSM4626767_CTCAGAACAACACTGTC-1 | GSM4626767 | Normal |
| GSM4626767_CTCAGAACAAGCGCTC-1  | GSM4626767 | Normal |
| GSM4626767_CTCAGAACAGAAGCAC-1  | GSM4626767 | Normal |
| GSM4626767_CTCAGAACATAAAGGT-1  | GSM4626767 | Normal |
| GSM4626767_CTCAGAAGTATATGGA-1  | GSM4626767 | Normal |
| GSM4626767_CTCAGAAGTCAAAGAT-1  | GSM4626767 | Normal |
| GSM4626767_CTCAGAAGTTCGTGAT-1  | GSM4626767 | Normal |
| GSM4626767_CTCAGAATCGGTCTAA-1  | GSM4626767 | Normal |
| GSM4626767_CTCAGAATCTGTCAAG-1  | GSM4626767 | Normal |
| GSM4626767_CTCATTAAGCTACCTA-1  | GSM4626767 | Normal |
| GSM4626767_CTCATTACAATCCAAC-1  | GSM4626767 | Normal |
| GSM4626767_CTCATTACACGAAACG-1  | GSM4626767 | Normal |
| GSM4626767_CTCATTATCTACTATC-1  | GSM4626767 | Normal |
| GSM4626767_CTCATTATCTGCTTGC-1  | GSM4626767 | Normal |
| GSM4626767_CTCCTAGCAGGCTCAC-1  | GSM4626767 | Normal |
| GSM4626767_CTCCTAGGTATCGCAT-1  | GSM4626767 | Normal |
| GSM4626767_CTCCTAGTCACCTCGT-1  | GSM4626767 | Normal |
| GSM4626767_CTCCTAGTCATCTGTT-1  | GSM4626767 | Normal |
| GSM4626767_CTCCTAGTCTTGATC-1   | GSM4626767 | Normal |
| GSM4626767_CTCGAAAAGCTTTGGT-1  | GSM4626767 | Normal |
| GSM4626767_CTCGAAAAGGCCCTCA-1  | GSM4626767 | Normal |

|                                |            |        |
|--------------------------------|------------|--------|
| GSM4626767_CTCGAAAAGTACGTAA-1  | GSM4626767 | Normal |
| GSM4626767_CTCGAAACACACTGCG-1  | GSM4626767 | Normal |
| GSM4626767_CTCGAAAAGTCCTCTTG-1 | GSM4626767 | Normal |
| GSM4626767_CTCGAAAAGTCTGATCA-1 | GSM4626767 | Normal |
| GSM4626767_CTCGAAATCTGGTTCC-1  | GSM4626767 | Normal |
| GSM4626767_CTCGAGGAGAACAATC-1  | GSM4626767 | Normal |
| GSM4626767_CTCGAGGCACCCAGTG-1  | GSM4626767 | Normal |
| GSM4626767_CTCGAGGCAGCCACCA-1  | GSM4626767 | Normal |
| GSM4626767_CTCGAGGGTAAATGAC-1  | GSM4626767 | Normal |
| GSM4626767_CTCGAGGTCAGAGACG-1  | GSM4626767 | Normal |
| GSM4626767_CTCGAGGTCCATGCTC-1  | GSM4626767 | Normal |
| GSM4626767_CTCGGAGAGGCAGTCA-1  | GSM4626767 | Normal |
| GSM4626767_CTCGGAGAGTTGCAGG-1  | GSM4626767 | Normal |
| GSM4626767_CTCGGAGCAGACACTT-1  | GSM4626767 | Normal |
| GSM4626767_CTCGGAGCAGCGTTCCG-1 | GSM4626767 | Normal |
| GSM4626767_CTCGGAGCATTAGCCA-1  | GSM4626767 | Normal |
| GSM4626767_CTCGGAGCATTATCTC-1  | GSM4626767 | Normal |
| GSM4626767_CTCGGAGGTGAAATCA-1  | GSM4626767 | Normal |
| GSM4626767_CTCGGGAAGATTACCC-1  | GSM4626767 | Normal |
| GSM4626767_CTCGGGAAGCCGTCGT-1  | GSM4626767 | Normal |
| GSM4626767_CTCGGGAAGTTACCCA-1  | GSM4626767 | Normal |
| GSM4626767_CTCGGGACAGTTAACC-1  | GSM4626767 | Normal |
| GSM4626767_CTCGGGAGTATTAGCC-1  | GSM4626767 | Normal |
| GSM4626767_CTCGGGAGTTTCGCTC-1  | GSM4626767 | Normal |
| GSM4626767_CTCGGGATCACGATGT-1  | GSM4626767 | Normal |
| GSM4626767_CTCGGGATCATATCGG-1  | GSM4626767 | Normal |
| GSM4626767_CTCGTACAGAGGGCTT-1  | GSM4626767 | Normal |
| GSM4626767_CTCGTACAGGCTACGA-1  | GSM4626767 | Normal |
| GSM4626767_CTCGTACCACATCCAA-1  | GSM4626767 | Normal |
| GSM4626767_CTCGTACCACGAAGCA-1  | GSM4626767 | Normal |
| GSM4626767_CTCGTACCAGGGTATG-1  | GSM4626767 | Normal |
| GSM4626767_CTCGTACCAGGTTTCA-1  | GSM4626767 | Normal |
| GSM4626767_CTCGTACGTAGATTAG-1  | GSM4626767 | Normal |
| GSM4626767_CTCGTACGTAGGCTGA-1  | GSM4626767 | Normal |
| GSM4626767_CTCGTACGTACATATGC-1 | GSM4626767 | Normal |
| GSM4626767_CTCGTACTCACGAAGG-1  | GSM4626767 | Normal |
| GSM4626767_CTCGTACTCCTGCAGG-1  | GSM4626767 | Normal |
| GSM4626767_CTCGTACTCTATCCCG-1  | GSM4626767 | Normal |
| GSM4626767_CTCGTCAAGATCGGGT-1  | GSM4626767 | Normal |
| GSM4626767_CTCGTCAAGTGAATTG-1  | GSM4626767 | Normal |
| GSM4626767_CTCGTCAAGTGTCTCA-1  | GSM4626767 | Normal |
| GSM4626767_CTCGTCACATCACGTA-1  | GSM4626767 | Normal |
| GSM4626767_CTCGTCACATCAGTAC-1  | GSM4626767 | Normal |
| GSM4626767_CTCGTCAGTACTTCTT-1  | GSM4626767 | Normal |
| GSM4626767_CTCGTCAGTGTGGCTC-1  | GSM4626767 | Normal |
| GSM4626767_CTCGTCATCACATGCA-1  | GSM4626767 | Normal |
| GSM4626767_CTCTAATAGCCTCGTG-1  | GSM4626767 | Normal |
| GSM4626767_CTCTAATAGCGTGTCC-1  | GSM4626767 | Normal |
| GSM4626767_CTCTAATCAAGAGTCG-1  | GSM4626767 | Normal |
| GSM4626767_CTCTAATCAATGGACG-1  | GSM4626767 | Normal |
| GSM4626767_CTCTAATCATGATCCA-1  | GSM4626767 | Normal |
| GSM4626767_CTCTAATGTACCCAAT-1  | GSM4626767 | Normal |
| GSM4626767_CTCTAATGTGAAGGCT-1  | GSM4626767 | Normal |
| GSM4626767_CTCTAATGTTACCGAT-1  | GSM4626767 | Normal |
| GSM4626767_CTCTAATTCATGTGGT-1  | GSM4626767 | Normal |
| GSM4626767_CTCTAATTCAGAGGA-1   | GSM4626767 | Normal |
| GSM4626767_CTCTAATTCCTCCTAG-1  | GSM4626767 | Normal |

|                               |            |        |
|-------------------------------|------------|--------|
| GSM4626767_CTCTAATTCGGAAATA-1 | GSM4626767 | Normal |
| GSM4626767_CTCTAATTCTACTCAT-1 | GSM4626767 | Normal |
| GSM4626767_CTCTAATTCTTACCTA-1 | GSM4626767 | Normal |
| GSM4626767_CTCTACGCAAGGCTCC-1 | GSM4626767 | Normal |
| GSM4626767_CTCTACGCACACGCTG-1 | GSM4626767 | Normal |
| GSM4626767_CTCTACGCACATTAGC-1 | GSM4626767 | Normal |
| GSM4626767_CTCTACGCATGTTGAC-1 | GSM4626767 | Normal |
| GSM4626767_CTCTACGTCACTTCAT-1 | GSM4626767 | Normal |
| GSM4626767_CTCTGGTAGCTGTCTA-1 | GSM4626767 | Normal |
| GSM4626767_CTCTGGTAGTCCAGGA-1 | GSM4626767 | Normal |
| GSM4626767_CTCTGGTCACATCCGG-1 | GSM4626767 | Normal |
| GSM4626767_CTCTGGTCATATGCTG-1 | GSM4626767 | Normal |
| GSM4626767_CTCTGGTGTTGCGTTA-1 | GSM4626767 | Normal |
| GSM4626767_CTCTGGTTCATTCTA-1  | GSM4626767 | Normal |
| GSM4626767_CTGAAACTCGTTACAG-1 | GSM4626767 | Normal |
| GSM4626767_CTGAAGTAGCCCTAAT-1 | GSM4626767 | Normal |
| GSM4626767_CTGAAGTAGGTGCAAC-1 | GSM4626767 | Normal |
| GSM4626767_CTGAAGTAGTTGCAGG-1 | GSM4626767 | Normal |
| GSM4626767_CTGAAGTCAGCGATCC-1 | GSM4626767 | Normal |
| GSM4626767_CTGAAGTGTTTAGGAA-1 | GSM4626767 | Normal |
| GSM4626767_CTGAAGTTCTTGAGGT-1 | GSM4626767 | Normal |
| GSM4626767_CTGATAGAGCAACGGT-1 | GSM4626767 | Normal |
| GSM4626767_CTGATAGGTAATCACC-1 | GSM4626767 | Normal |
| GSM4626767_CTGATCCGTCCGAGTC-1 | GSM4626767 | Normal |
| GSM4626767_CTGATCCGTCTGGAGA-1 | GSM4626767 | Normal |
| GSM4626767_CTGCCTAAGCGTTTAC-1 | GSM4626767 | Normal |
| GSM4626767_CTGCCTACACACAGAG-1 | GSM4626767 | Normal |
| GSM4626767_CTGCCTACACGGCCAT-1 | GSM4626767 | Normal |
| GSM4626767_CTGCCTACATATGAGA-1 | GSM4626767 | Normal |
| GSM4626767_CTGCCTAGTCCAACTA-1 | GSM4626767 | Normal |
| GSM4626767_CTGCCTAGTGGTACAG-1 | GSM4626767 | Normal |
| GSM4626767_CTGCCTAGTTCGCGAC-1 | GSM4626767 | Normal |
| GSM4626767_CTGCGGAAGTGGTCCC-1 | GSM4626767 | Normal |
| GSM4626767_CTGCGGACACCAGGCT-1 | GSM4626767 | Normal |
| GSM4626767_CTGCGGACACCCTATC-1 | GSM4626767 | Normal |
| GSM4626767_CTGCGGAGTAGCTTGT-1 | GSM4626767 | Normal |
| GSM4626767_CTGCGGAGTATATGGA-1 | GSM4626767 | Normal |
| GSM4626767_CTGCGGAGTCGTGGCT-1 | GSM4626767 | Normal |
| GSM4626767_CTGCGGAGTGTGCTG-1  | GSM4626767 | Normal |
| GSM4626767_CTGCGGATCACAAACC-1 | GSM4626767 | Normal |
| GSM4626767_CTGCGGATCACTCTTA-1 | GSM4626767 | Normal |
| GSM4626767_CTGCGGATCATGCATG-1 | GSM4626767 | Normal |
| GSM4626767_CTGCTGTAGAACAATC-1 | GSM4626767 | Normal |
| GSM4626767_CTGCTGTCACCCATGG-1 | GSM4626767 | Normal |
| GSM4626767_CTGCTGTCATCACCT-1  | GSM4626767 | Normal |
| GSM4626767_CTGCTGTGTAATGAC-1  | GSM4626767 | Normal |
| GSM4626767_CTGCTGTGTCGCTGA-1  | GSM4626767 | Normal |
| GSM4626767_CTGCTGTTACCCGAG-1  | GSM4626767 | Normal |
| GSM4626767_CTGCTGTTCTCTTATG-1 | GSM4626767 | Normal |
| GSM4626767_CTGCTGTTCTGTCAAG-1 | GSM4626767 | Normal |
| GSM4626767_CTGCTGTTCTTGACGA-1 | GSM4626767 | Normal |
| GSM4626767_CTGGTCTAGATCTGAA-1 | GSM4626767 | Normal |
| GSM4626767_CTGGTCTAGCGTTTAC-1 | GSM4626767 | Normal |
| GSM4626767_CTGGTCTCAGGGATTG-1 | GSM4626767 | Normal |
| GSM4626767_CTGGTCTCATACGCTA-1 | GSM4626767 | Normal |
| GSM4626767_CTGGTCTGTACGAAAT-1 | GSM4626767 | Normal |
| GSM4626767_CTGGTCTTCTAACCGA-1 | GSM4626767 | Normal |

|                                |            |        |
|--------------------------------|------------|--------|
| GSM4626767_CTGGTCTTCTCCTATA-1  | GSM4626767 | Normal |
| GSM4626767_CTGGTCTTCTTGTCAT-1  | GSM4626767 | Normal |
| GSM4626767_CTGTGCTAGATCGGGT-1  | GSM4626767 | Normal |
| GSM4626767_CTGTGCTAGATCTGAA-1  | GSM4626767 | Normal |
| GSM4626767_CTGTGCTCAATAACGA-1  | GSM4626767 | Normal |
| GSM4626767_CTGTGCTGTACATCCA-1  | GSM4626767 | Normal |
| GSM4626767_CTGTGCTGTAGCTTGT-1  | GSM4626767 | Normal |
| GSM4626767_CTGTGCTGTTGGTTTG-1  | GSM4626767 | Normal |
| GSM4626767_CTGTGCTTCGTTGACA-1  | GSM4626767 | Normal |
| GSM4626767_CTGTTTACAGCCTATA-1  | GSM4626767 | Normal |
| GSM4626767_CTGTTTACAGCGATCC-1  | GSM4626767 | Normal |
| GSM4626767_CTGTTTACATTGAGCT-1  | GSM4626767 | Normal |
| GSM4626767_CTGTTTAGTCATACTG-1  | GSM4626767 | Normal |
| GSM4626767_CTGTTTATCACTTCAT-1  | GSM4626767 | Normal |
| GSM4626767_CTTAACTAGAATTGTG-1  | GSM4626767 | Normal |
| GSM4626767_CTTAACTAGATACACA-1  | GSM4626767 | Normal |
| GSM4626767_CTTAACTAGCTAGTTC-1  | GSM4626767 | Normal |
| GSM4626767_CTTAACTAGCTATGCT-1  | GSM4626767 | Normal |
| GSM4626767_CTTAACTAGTCAAGCG-1  | GSM4626767 | Normal |
| GSM4626767_CTTAACTACTACAGT-1   | GSM4626767 | Normal |
| GSM4626767_CTTAACTGTTCTGAAC-1  | GSM4626767 | Normal |
| GSM4626767_CTTAACTTCAACGCTA-1  | GSM4626767 | Normal |
| GSM4626767_CTTAACTTCTAACGGT-1  | GSM4626767 | Normal |
| GSM4626767_CTTAACTTCTTTAGGG-1  | GSM4626767 | Normal |
| GSM4626767_CTTACCGAGATGGGTC-1  | GSM4626767 | Normal |
| GSM4626767_CTTACCGAGGGCACTA-1  | GSM4626767 | Normal |
| GSM4626767_CTTACCGAGTGTTAGA-1  | GSM4626767 | Normal |
| GSM4626767_CTTACCGCACCAGCAC-1  | GSM4626767 | Normal |
| GSM4626767_CTTACCGCAGTGGGAT-1  | GSM4626767 | Normal |
| GSM4626767_CTTACCGGTACCGTTA-1  | GSM4626767 | Normal |
| GSM4626767_CTTAGGAAGACTAGAT-1  | GSM4626767 | Normal |
| GSM4626767_CTTAGGAAGATCCGAG-1  | GSM4626767 | Normal |
| GSM4626767_CTTAGGAAGCGTCTAT-1  | GSM4626767 | Normal |
| GSM4626767_CTTAGGACATAGACTC-1  | GSM4626767 | Normal |
| GSM4626767_CTTAGGAGTCATGCAT-1  | GSM4626767 | Normal |
| GSM4626767_CTTAGGAGTGTCTGAT-1  | GSM4626767 | Normal |
| GSM4626767_CTTAGGAGTGTTAAGA-1  | GSM4626767 | Normal |
| GSM4626767_CTTAGGATCTTTAGGG-1  | GSM4626767 | Normal |
| GSM4626767_CTTCTCTAGAAACGCC-1  | GSM4626767 | Normal |
| GSM4626767_CTTCTCTAGACGACGT-1  | GSM4626767 | Normal |
| GSM4626767_CTTCTCTAGGGTTCGAT-1 | GSM4626767 | Normal |
| GSM4626767_CTTCTCTCAATCAGAA-1  | GSM4626767 | Normal |
| GSM4626767_CTTCTCTCACGGATAG-1  | GSM4626767 | Normal |
| GSM4626767_CTTCTCTCATGAAGTA-1  | GSM4626767 | Normal |
| GSM4626767_CTTCTCTCATGCCGA-1   | GSM4626767 | Normal |
| GSM4626767_CTTCTCTGTAAGTGGC-1  | GSM4626767 | Normal |
| GSM4626767_CTTCTCTGTACCATCA-1  | GSM4626767 | Normal |
| GSM4626767_CTTCTCTGTGTGGTTT-1  | GSM4626767 | Normal |
| GSM4626767_CTTCTCTTCCTTTCCGG-1 | GSM4626767 | Normal |
| GSM4626767_CTTCTCTTCGAACGGA-1  | GSM4626767 | Normal |
| GSM4626767_CTTCTCTTCGGCGCAT-1  | GSM4626767 | Normal |
| GSM4626767_CTTGGCTCAAACGTGTC-1 | GSM4626767 | Normal |
| GSM4626767_CTTGGCTCATCAGTCA-1  | GSM4626767 | Normal |
| GSM4626767_CTTGGCTGTAAACCTC-1  | GSM4626767 | Normal |
| GSM4626767_CTTGGCTGTATGCTTG-1  | GSM4626767 | Normal |
| GSM4626767_CTTGGCTGTCTCACCT-1  | GSM4626767 | Normal |
| GSM4626767_CTTGGCTGTCTCCATC-1  | GSM4626767 | Normal |

|                                |            |        |
|--------------------------------|------------|--------|
| GSM4626767_CTTGGCTTCAGCTTAG-1  | GSM4626767 | Normal |
| GSM4626767_CTTGGCTTCGATAGAA-1  | GSM4626767 | Normal |
| GSM4626767_CTTGGCTTCGGCTACG-1  | GSM4626767 | Normal |
| GSM4626767_CTTGGCTTCGTACCGG-1  | GSM4626767 | Normal |
| GSM4626767_CTTGGCTTCTGCTGCT-1  | GSM4626767 | Normal |
| GSM4626767_CTTGGCTTCTGCTTGC-1  | GSM4626767 | Normal |
| GSM4626767_CTTGGCTTCTGGGCCA-1  | GSM4626767 | Normal |
| GSM4626767_CTTTGCAGACTAGAT-1   | GSM4626767 | Normal |
| GSM4626767_CTTTGCAGATCACGG-1   | GSM4626767 | Normal |
| GSM4626767_CTTTGCAGGACCACA-1   | GSM4626767 | Normal |
| GSM4626767_CTTTGCCAATTGCTG-1   | GSM4626767 | Normal |
| GSM4626767_CTTTGCAGATGGCA-1    | GSM4626767 | Normal |
| GSM4626767_CTTTGCAGCATGCTGGC-1 | GSM4626767 | Normal |
| GSM4626767_CTTTGCAGTCCGAACC-1  | GSM4626767 | Normal |
| GSM4626767_CTTTGCAGTGGTGA-1    | GSM4626767 | Normal |
| GSM4626767_GAAACTCAGAATGTTG-1  | GSM4626767 | Normal |
| GSM4626767_GAAACTCAGGGAAACA-1  | GSM4626767 | Normal |
| GSM4626767_GAAACTCCAGGAATCG-1  | GSM4626767 | Normal |
| GSM4626767_GAAACTCGTTCGGCA-1   | GSM4626767 | Normal |
| GSM4626767_GAAACTCTCATGTAGC-1  | GSM4626767 | Normal |
| GSM4626767_GAAACTCTCCCTTGTG-1  | GSM4626767 | Normal |
| GSM4626767_GAAACTCTCCGTTGTC-1  | GSM4626767 | Normal |
| GSM4626767_GAAACTCTCTACTTAC-1  | GSM4626767 | Normal |
| GSM4626767_GAAACTCTCTGTCTAT-1  | GSM4626767 | Normal |
| GSM4626767_GAAATGAAGCGCCTTG-1  | GSM4626767 | Normal |
| GSM4626767_GAAATGAAGGAATTAC-1  | GSM4626767 | Normal |
| GSM4626767_GAAATGAAGTGCAAGC-1  | GSM4626767 | Normal |
| GSM4626767_GAAATGATCCAGAGGA-1  | GSM4626767 | Normal |
| GSM4626767_GAACATCAGCCACCTG-1  | GSM4626767 | Normal |
| GSM4626767_GAACATCAGGCAGTCA-1  | GSM4626767 | Normal |
| GSM4626767_GAACATCAGTACGATA-1  | GSM4626767 | Normal |
| GSM4626767_GAACATCAGTCCAGGA-1  | GSM4626767 | Normal |
| GSM4626767_GAACATCAGTGAACAT-1  | GSM4626767 | Normal |
| GSM4626767_GAACATCAGTTATCGC-1  | GSM4626767 | Normal |
| GSM4626767_GAACATCTCGGTTAAC-1  | GSM4626767 | Normal |
| GSM4626767_GAACCTAAGTGCAAGC-1  | GSM4626767 | Normal |
| GSM4626767_GAACCTACAAACCCAT-1  | GSM4626767 | Normal |
| GSM4626767_GAACCTAGTAACGACG-1  | GSM4626767 | Normal |
| GSM4626767_GAACCTAGTTACTGAC-1  | GSM4626767 | Normal |
| GSM4626767_GAACCTAGTTCACGG-1   | GSM4626767 | Normal |
| GSM4626767_GAACCTATCGGACAAG-1  | GSM4626767 | Normal |
| GSM4626767_GAACGGAAGATCTGCT-1  | GSM4626767 | Normal |
| GSM4626767_GAACGGACACAGGCCT-1  | GSM4626767 | Normal |
| GSM4626767_GAACGGACACTTCTGC-1  | GSM4626767 | Normal |
| GSM4626767_GAACGGACAGCTGCAC-1  | GSM4626767 | Normal |
| GSM4626767_GAACGGACATCGATTG-1  | GSM4626767 | Normal |
| GSM4626767_GAACGGACATGCCTTC-1  | GSM4626767 | Normal |
| GSM4626767_GAACGGAGTAATCACC-1  | GSM4626767 | Normal |
| GSM4626767_GAACGGAGTTCCTCT-1   | GSM4626767 | Normal |
| GSM4626767_GAACGGATCCCGGATG-1  | GSM4626767 | Normal |
| GSM4626767_GAACGGATCCGCATAA-1  | GSM4626767 | Normal |
| GSM4626767_GAAGCAGCACACTGCG-1  | GSM4626767 | Normal |
| GSM4626767_GAAGCAGCACCATCCT-1  | GSM4626767 | Normal |
| GSM4626767_GAAGCAGGTGACTCAT-1  | GSM4626767 | Normal |
| GSM4626767_GAAGCAGGTGATGATA-1  | GSM4626767 | Normal |
| GSM4626767_GAAGCAGGTGGACGAT-1  | GSM4626767 | Normal |
| GSM4626767_GAAGCAGGTTATGCGT-1  | GSM4626767 | Normal |

|                                |            |        |
|--------------------------------|------------|--------|
| GSM4626767_GAAGCAGTCCTATTCA-1  | GSM4626767 | Normal |
| GSM4626767_GAAGCAGTCTACTATC-1  | GSM4626767 | Normal |
| GSM4626767_GAATAAGAGGCCCTCA-1  | GSM4626767 | Normal |
| GSM4626767_GAATAAGGTAGCCTAT-1  | GSM4626767 | Normal |
| GSM4626767_GAATAAGGTATAAACG-1  | GSM4626767 | Normal |
| GSM4626767_GAATAAGGTTACGTCA-1  | GSM4626767 | Normal |
| GSM4626767_GAATAAGTCACTGGGC-1  | GSM4626767 | Normal |
| GSM4626767_GAATAAGTCCGCATCT-1  | GSM4626767 | Normal |
| GSM4626767_GAATGAAAGTACACCT-1  | GSM4626767 | Normal |
| GSM4626767_GAATGAAAGTTTAGGA-1  | GSM4626767 | Normal |
| GSM4626767_GAATGAACAACACCTA-1  | GSM4626767 | Normal |
| GSM4626767_GAATGAACAAGGCTCC-1  | GSM4626767 | Normal |
| GSM4626767_GAATGAACACGGCCAT-1  | GSM4626767 | Normal |
| GSM4626767_GAATGAACATTTTCAGG-1 | GSM4626767 | Normal |
| GSM4626767_GAATGAAGTAATCACC-1  | GSM4626767 | Normal |
| GSM4626767_GAATGAAGTCTCATCC-1  | GSM4626767 | Normal |
| GSM4626767_GAATGAAGTTACGGAG-1  | GSM4626767 | Normal |
| GSM4626767_GACACGCAGAGACTTA-1  | GSM4626767 | Normal |
| GSM4626767_GACACGCCAAGGTTTC-1  | GSM4626767 | Normal |
| GSM4626767_GACACGCCACCTCGTT-1  | GSM4626767 | Normal |
| GSM4626767_GACACGCGTGACGGTA-1  | GSM4626767 | Normal |
| GSM4626767_GACACGCTCAGAAATG-1  | GSM4626767 | Normal |
| GSM4626767_GACAGAGAGCACCGCT-1  | GSM4626767 | Normal |
| GSM4626767_GACAGAGAGGTGTGGT-1  | GSM4626767 | Normal |
| GSM4626767_GACAGAGCAAGGCTCC-1  | GSM4626767 | Normal |
| GSM4626767_GACAGAGCACATAACC-1  | GSM4626767 | Normal |
| GSM4626767_GACAGAGCATTGGGCC-1  | GSM4626767 | Normal |
| GSM4626767_GACAGAGGTGAGTATA-1  | GSM4626767 | Normal |
| GSM4626767_GACAGAGTCGTATCAG-1  | GSM4626767 | Normal |
| GSM4626767_GACAGAGTCTACCTGC-1  | GSM4626767 | Normal |
| GSM4626767_GACCAATAGAACAAC-1   | GSM4626767 | Normal |
| GSM4626767_GACCAATAGAGGTTGC-1  | GSM4626767 | Normal |
| GSM4626767_GACCAATAGCACCGCT-1  | GSM4626767 | Normal |
| GSM4626767_GACCAATAGGCCCTTG-1  | GSM4626767 | Normal |
| GSM4626767_GACCAATGTAGCAAAT-1  | GSM4626767 | Normal |
| GSM4626767_GACCAATGTATTCTCT-1  | GSM4626767 | Normal |
| GSM4626767_GACCAATGTGATAAAC-1  | GSM4626767 | Normal |
| GSM4626767_GACCAATTCCAGTATG-1  | GSM4626767 | Normal |
| GSM4626767_GACCTGGAGAGGTAGA-1  | GSM4626767 | Normal |
| GSM4626767_GACCTGGAGAGTCGGT-1  | GSM4626767 | Normal |
| GSM4626767_GACCTGGAGATCTGCT-1  | GSM4626767 | Normal |
| GSM4626767_GACCTGGAGATGCGAC-1  | GSM4626767 | Normal |
| GSM4626767_GACCTGGAGGAGCGTT-1  | GSM4626767 | Normal |
| GSM4626767_GACCTGGAGTGTGAAT-1  | GSM4626767 | Normal |
| GSM4626767_GACCTGGAGTGTGAA-1   | GSM4626767 | Normal |
| GSM4626767_GACCTGGCATCGATGT-1  | GSM4626767 | Normal |
| GSM4626767_GACCTGGTCGAATCCA-1  | GSM4626767 | Normal |
| GSM4626767_GACGCGTAGCCACTAT-1  | GSM4626767 | Normal |
| GSM4626767_GACGCGTAGGCAATTA-1  | GSM4626767 | Normal |
| GSM4626767_GACGCGTAGTATCTCG-1  | GSM4626767 | Normal |
| GSM4626767_GACGCGTAGTTCGATC-1  | GSM4626767 | Normal |
| GSM4626767_GACGCGTCATCCGCGA-1  | GSM4626767 | Normal |
| GSM4626767_GACGCGTGTATAGTAG-1  | GSM4626767 | Normal |
| GSM4626767_GACGCGTGTCCGCTGA-1  | GSM4626767 | Normal |
| GSM4626767_GACGCGTGTGGTTTG-1   | GSM4626767 | Normal |
| GSM4626767_GACGCGTTCAGCTGGC-1  | GSM4626767 | Normal |
| GSM4626767_GACGCGTTCGCGGTA-1   | GSM4626767 | Normal |

|                                |            |        |
|--------------------------------|------------|--------|
| GSM4626767_GACGGCTAGAAGGTTT-1  | GSM4626767 | Normal |
| GSM4626767_GACGGCTAGTAGGTGC-1  | GSM4626767 | Normal |
| GSM4626767_GACGGCTCAATAGAGT-1  | GSM4626767 | Normal |
| GSM4626767_GACGGCTCAATGGTCT-1  | GSM4626767 | Normal |
| GSM4626767_GACGGCTCACAGTCGC-1  | GSM4626767 | Normal |
| GSM4626767_GACGGCTCATGCATGT-1  | GSM4626767 | Normal |
| GSM4626767_GACGGCTGTAGAAAGG-1  | GSM4626767 | Normal |
| GSM4626767_GACGGCTGTGAAGGCT-1  | GSM4626767 | Normal |
| GSM4626767_GACGGCTGTTCTGTTT-1  | GSM4626767 | Normal |
| GSM4626767_GACGGCTTCACCCTCA-1  | GSM4626767 | Normal |
| GSM4626767_GACGGCTTCCTTCAAT-1  | GSM4626767 | Normal |
| GSM4626767_GACGGCTTCGCGTTTT-1  | GSM4626767 | Normal |
| GSM4626767_GACGTGCAGGCAATTA-1  | GSM4626767 | Normal |
| GSM4626767_GACGTGCAGGCAGTCA-1  | GSM4626767 | Normal |
| GSM4626767_GACGTGCGTCAAATC-1   | GSM4626767 | Normal |
| GSM4626767_GACGTGCGTGAGGCTA-1  | GSM4626767 | Normal |
| GSM4626767_GACGTGCTCAGAGACG-1  | GSM4626767 | Normal |
| GSM4626767_GACGTTAAGTGGACGT-1  | GSM4626767 | Normal |
| GSM4626767_GACGTTACATGCTAGT-1  | GSM4626767 | Normal |
| GSM4626767_GACGTTAGTCATTAGC-1  | GSM4626767 | Normal |
| GSM4626767_GACGTTAGTCGGCACT-1  | GSM4626767 | Normal |
| GSM4626767_GACGTTAGTTGCTCCT-1  | GSM4626767 | Normal |
| GSM4626767_GACGTTATCTCGAGTA-1  | GSM4626767 | Normal |
| GSM4626767_GACTAACAGAGTGACC-1  | GSM4626767 | Normal |
| GSM4626767_GACTAACAGTCCGTAT-1  | GSM4626767 | Normal |
| GSM4626767_GACTAACCAAGTAATG-1  | GSM4626767 | Normal |
| GSM4626767_GACTAACAGCTGTGC-1   | GSM4626767 | Normal |
| GSM4626767_GACTAACGTAAACCTC-1  | GSM4626767 | Normal |
| GSM4626767_GACTAACGTCTAGCGC-1  | GSM4626767 | Normal |
| GSM4626767_GACTAACTCGGTGTTA-1  | GSM4626767 | Normal |
| GSM4626767_GACTACAAGACTAAGT-1  | GSM4626767 | Normal |
| GSM4626767_GACTACAAGCGTCAAG-1  | GSM4626767 | Normal |
| GSM4626767_GACTACAAGGCTCAGA-1  | GSM4626767 | Normal |
| GSM4626767_GACTACACAATGTTGC-1  | GSM4626767 | Normal |
| GSM4626767_GACTACACACCCATTC-1  | GSM4626767 | Normal |
| GSM4626767_GACTACACATCATCCC-1  | GSM4626767 | Normal |
| GSM4626767_GACTACATCACCAGGC-1  | GSM4626767 | Normal |
| GSM4626767_GACTACATCAGCTGGC-1  | GSM4626767 | Normal |
| GSM4626767_GACTACATCCCAAGTA-1  | GSM4626767 | Normal |
| GSM4626767_GACTGCGAGCCTATGT-1  | GSM4626767 | Normal |
| GSM4626767_GACTGCGAGGCAGTCA-1  | GSM4626767 | Normal |
| GSM4626767_GACTGCGCAATAAGCA-1  | GSM4626767 | Normal |
| GSM4626767_GACTGCGCAGGGTATG-1  | GSM4626767 | Normal |
| GSM4626767_GACTGCGCATTACGAC-1  | GSM4626767 | Normal |
| GSM4626767_GACTGCGGTAAGTGGC-1  | GSM4626767 | Normal |
| GSM4626767_GACTGCGGTCCAATA-1   | GSM4626767 | Normal |
| GSM4626767_GACTGCGGTGACTACT-1  | GSM4626767 | Normal |
| GSM4626767_GACTGCGGTTGGGACA-1  | GSM4626767 | Normal |
| GSM4626767_GAGCAGAAGCGTAGTG-1  | GSM4626767 | Normal |
| GSM4626767_GAGCAGAAGGCTATCT-1  | GSM4626767 | Normal |
| GSM4626767_GAGCAGACAATAACGA-1  | GSM4626767 | Normal |
| GSM4626767_GAGCAGACACATTCTGA-1 | GSM4626767 | Normal |
| GSM4626767_GAGCAGACACCAGCAC-1  | GSM4626767 | Normal |
| GSM4626767_GAGCAGACAGGAATCG-1  | GSM4626767 | Normal |
| GSM4626767_GAGCAGAGTCTGATTG-1  | GSM4626767 | Normal |
| GSM4626767_GAGCAGAGTGAGTGAC-1  | GSM4626767 | Normal |
| GSM4626767_GAGCAGAGTTACCAGT-1  | GSM4626767 | Normal |

|                                |            |        |
|--------------------------------|------------|--------|
| GSM4626767_GAGCAGATCATCTGTT-1  | GSM4626767 | Normal |
| GSM4626767_GAGCAGATCGGAAACG-1  | GSM4626767 | Normal |
| GSM4626767_GAGCAGATCGTACCGG-1  | GSM4626767 | Normal |
| GSM4626767_GAGCAGATCTACCTGC-1  | GSM4626767 | Normal |
| GSM4626767_GAGCAGATCTTGAGAC-1  | GSM4626767 | Normal |
| GSM4626767_GAGGTGAAGCCCTAAT-1  | GSM4626767 | Normal |
| GSM4626767_GAGGTGAAGTTCCACA-1  | GSM4626767 | Normal |
| GSM4626767_GAGGTGACAAATCCGT-1  | GSM4626767 | Normal |
| GSM4626767_GAGGTGACAATCACAC-1  | GSM4626767 | Normal |
| GSM4626767_GAGGTGAGTCGGATCC-1  | GSM4626767 | Normal |
| GSM4626767_GAGGTGAGTCTTCGTC-1  | GSM4626767 | Normal |
| GSM4626767_GAGGTGAGTGGAAGA-1   | GSM4626767 | Normal |
| GSM4626767_GAGGTGAGTTCCCGAG-1  | GSM4626767 | Normal |
| GSM4626767_GAGGTGAGTTTGACTG-1  | GSM4626767 | Normal |
| GSM4626767_GAGGTGATCGCTGATA-1  | GSM4626767 | Normal |
| GSM4626767_GAGTCCGAGCTGCAAG-1  | GSM4626767 | Normal |
| GSM4626767_GAGTCCGGTTGGACCC-1  | GSM4626767 | Normal |
| GSM4626767_GAGTCCGTCAGGATCT-1  | GSM4626767 | Normal |
| GSM4626767_GAGTCCGTCATCGCTC-1  | GSM4626767 | Normal |
| GSM4626767_GAGTCCGTCTTTCCTC-1  | GSM4626767 | Normal |
| GSM4626767_GATCAGTAGTGCCAT-1   | GSM4626767 | Normal |
| GSM4626767_GATCAGTCAGCCAGAA-1  | GSM4626767 | Normal |
| GSM4626767_GATCAGTCATATGAGA-1  | GSM4626767 | Normal |
| GSM4626767_GATCAGTGTGAAGGCT-1  | GSM4626767 | Normal |
| GSM4626767_GATCAGTGTTAAAGAC-1  | GSM4626767 | Normal |
| GSM4626767_GATCAGTTCTATCCCG-1  | GSM4626767 | Normal |
| GSM4626767_GATCGATAGTACGATA-1  | GSM4626767 | Normal |
| GSM4626767_GATCGATGTACAGACG-1  | GSM4626767 | Normal |
| GSM4626767_GATCGATGTGGCCCTA-1  | GSM4626767 | Normal |
| GSM4626767_GATCGATTCTTCAACT-1  | GSM4626767 | Normal |
| GSM4626767_GATCGCGAGATAGGAG-1  | GSM4626767 | Normal |
| GSM4626767_GATCGCGCAAAGTGCG-1  | GSM4626767 | Normal |
| GSM4626767_GATCGCGCAAATACAG-1  | GSM4626767 | Normal |
| GSM4626767_GATCGCGCACAGCCCA-1  | GSM4626767 | Normal |
| GSM4626767_GATCGCGGTATCTGCA-1  | GSM4626767 | Normal |
| GSM4626767_GATCGCGGTTTAGCTG-1  | GSM4626767 | Normal |
| GSM4626767_GATCGCGTCCCTATGTT-1 | GSM4626767 | Normal |
| GSM4626767_GATCGCGTCTCGGACG-1  | GSM4626767 | Normal |
| GSM4626767_GATCGCGTCTTGTTTG-1  | GSM4626767 | Normal |
| GSM4626767_GATCGTAAGCTAGTGG-1  | GSM4626767 | Normal |
| GSM4626767_GATCGTAAGTTGTCGT-1  | GSM4626767 | Normal |
| GSM4626767_GATCGTAGTCAGTGGA-1  | GSM4626767 | Normal |
| GSM4626767_GATCGTAGTGACGCCT-1  | GSM4626767 | Normal |
| GSM4626767_GATCTAGAGCAATCTC-1  | GSM4626767 | Normal |
| GSM4626767_GATCTAGAGCTGATAA-1  | GSM4626767 | Normal |
| GSM4626767_GATCTAGAGTTAGCGG-1  | GSM4626767 | Normal |
| GSM4626767_GATCTAGCAGTAAGCG-1  | GSM4626767 | Normal |
| GSM4626767_GATCTAGGTGCTCTTC-1  | GSM4626767 | Normal |
| GSM4626767_GATCTAGGTGCTGTAT-1  | GSM4626767 | Normal |
| GSM4626767_GATCTAGTCCCTCTTT-1  | GSM4626767 | Normal |
| GSM4626767_GATCTAGTCTGGTGTA-1  | GSM4626767 | Normal |
| GSM4626767_GATCTAGTCTTGCAAG-1  | GSM4626767 | Normal |
| GSM4626767_GATGAAAAGCGATTCT-1  | GSM4626767 | Normal |
| GSM4626767_GATGAAAAGTGCTGCC-1  | GSM4626767 | Normal |
| GSM4626767_GATGAAACAAGAGTCG-1  | GSM4626767 | Normal |
| GSM4626767_GATGAAACAAGTAGTA-1  | GSM4626767 | Normal |
| GSM4626767_GATGAAACACCACGTG-1  | GSM4626767 | Normal |



|                                 |            |        |
|---------------------------------|------------|--------|
| GSM4626767_GATGAAACACCATCCT-1   | GSM4626767 | Normal |
| GSM4626767_GATGAAACATGGATGG-1   | GSM4626767 | Normal |
| GSM4626767_GATGAAATCAGGCCCA-1   | GSM4626767 | Normal |
| GSM4626767_GATGAAATCCTCGCAT-1   | GSM4626767 | Normal |
| GSM4626767_GATGAGGAGCCCAATT-1   | GSM4626767 | Normal |
| GSM4626767_GATGAGGAGGCTAGCA-1   | GSM4626767 | Normal |
| GSM4626767_GATGAGGAGTGGAAT-1    | GSM4626767 | Normal |
| GSM4626767_GATGAGGAGTTGAGTA-1   | GSM4626767 | Normal |
| GSM4626767_GATGAGGCAGACGCTC-1   | GSM4626767 | Normal |
| GSM4626767_GATGAGGGTATATCCG-1   | GSM4626767 | Normal |
| GSM4626767_GATGAGGGTGGCAAAC-1   | GSM4626767 | Normal |
| GSM4626767_GATGAGGTCAAACCGT-1   | GSM4626767 | Normal |
| GSM4626767_GATGAGGTCCTGCCAT-1   | GSM4626767 | Normal |
| GSM4626767_GATGAGGTCGGTGTCTG-1  | GSM4626767 | Normal |
| GSM4626767_GATGCTAAGCGTGAGT-1   | GSM4626767 | Normal |
| GSM4626767_GATGCTAAGGGAAACA-1   | GSM4626767 | Normal |
| GSM4626767_GATGCTACACGCCAGT-1   | GSM4626767 | Normal |
| GSM4626767_GATGCTAGTAATTGGA-1   | GSM4626767 | Normal |
| GSM4626767_GATGCTATCACAGTAC-1   | GSM4626767 | Normal |
| GSM4626767_GATGCTATCAGGCCCA-1   | GSM4626767 | Normal |
| GSM4626767_GATGCTATCCGAGCCA-1   | GSM4626767 | Normal |
| GSM4626767_GATTCAGAGGGTTTCT-1   | GSM4626767 | Normal |
| GSM4626767_GATTCAGGTACCGTAT-1   | GSM4626767 | Normal |
| GSM4626767_GATTCAGGTTCCAACA-1   | GSM4626767 | Normal |
| GSM4626767_GATTCAGTCTACTCAT-1   | GSM4626767 | Normal |
| GSM4626767_GCAAACACTAGAAACGAG-1 | GSM4626767 | Normal |
| GSM4626767_GCAAACACTAGCCACGCT-1 | GSM4626767 | Normal |
| GSM4626767_GCAAACACTCATAGTAAG-1 | GSM4626767 | Normal |
| GSM4626767_GCAAACACTGTAATCACC-1 | GSM4626767 | Normal |
| GSM4626767_GCAAACACTGTACGCTGC-1 | GSM4626767 | Normal |
| GSM4626767_GCAAACACTGTAGAAAGG-1 | GSM4626767 | Normal |
| GSM4626767_GCAAACACTGTAGCTAAA-1 | GSM4626767 | Normal |
| GSM4626767_GCAAACACTGTCTAGTCA-1 | GSM4626767 | Normal |
| GSM4626767_GCAAACACTGTGTTGGGA-1 | GSM4626767 | Normal |
| GSM4626767_GCAAACACTTCTGTACC-1  | GSM4626767 | Normal |
| GSM4626767_GCAATCAAGGCTCATT-1   | GSM4626767 | Normal |
| GSM4626767_GCAATCAAGTCATCCA-1   | GSM4626767 | Normal |
| GSM4626767_GCAATCAAGTGGTCCC-1   | GSM4626767 | Normal |
| GSM4626767_GCAATCAAGTGTGAAT-1   | GSM4626767 | Normal |
| GSM4626767_GCAATCACATTAACCG-1   | GSM4626767 | Normal |
| GSM4626767_GCAATCAGTGCAACGA-1   | GSM4626767 | Normal |
| GSM4626767_GCAATCAGTGCCTGCA-1   | GSM4626767 | Normal |
| GSM4626767_GCAATCAGTGTATGGG-1   | GSM4626767 | Normal |
| GSM4626767_GCAATCATCTCTGCTG-1   | GSM4626767 | Normal |
| GSM4626767_GCACATAAGAACAATC-1   | GSM4626767 | Normal |
| GSM4626767_GCACATAAGACTGGGT-1   | GSM4626767 | Normal |
| GSM4626767_GCACATAAGATCCCAT-1   | GSM4626767 | Normal |
| GSM4626767_GCACATAAGTACGATA-1   | GSM4626767 | Normal |
| GSM4626767_GCACATACCCCATGG-1    | GSM4626767 | Normal |
| GSM4626767_GCACATATCGGGAGTA-1   | GSM4626767 | Normal |
| GSM4626767_GCACATATCTGCCCTA-1   | GSM4626767 | Normal |
| GSM4626767_GCACATATCTGCGTAA-1   | GSM4626767 | Normal |
| GSM4626767_GCACTCTAGGATGGTC-1   | GSM4626767 | Normal |
| GSM4626767_GCACTCTAGGCAGTCA-1   | GSM4626767 | Normal |
| GSM4626767_GCACTCTGTCTGCCAG-1   | GSM4626767 | Normal |
| GSM4626767_GCACTCTGTTGTACAC-1   | GSM4626767 | Normal |
| GSM4626767_GCACTCTTCAATCTCT-1   | GSM4626767 | Normal |

|                                |            |        |
|--------------------------------|------------|--------|
| GSM4626767_GCACCTCTTCATCGGAT-1 | GSM4626767 | Normal |
| GSM4626767_GCACCTCTTCGCTAGCG-1 | GSM4626767 | Normal |
| GSM4626767_GCACCTCTTCTTACCGC-1 | GSM4626767 | Normal |
| GSM4626767_GCAGCCAAGAATAGGG-1  | GSM4626767 | Normal |
| GSM4626767_GCAGCCAAGCACCGTC-1  | GSM4626767 | Normal |
| GSM4626767_GCAGCCAAGGCGTACA-1  | GSM4626767 | Normal |
| GSM4626767_GCAGCCACAAGTAGTA-1  | GSM4626767 | Normal |
| GSM4626767_GCAGCCACAGGGTTAG-1  | GSM4626767 | Normal |
| GSM4626767_GCAGCCAGTAAACCTC-1  | GSM4626767 | Normal |
| GSM4626767_GCAGCCAGTGTGCTG-1   | GSM4626767 | Normal |
| GSM4626767_GCAGCCATCAGCATGT-1  | GSM4626767 | Normal |
| GSM4626767_GCAGTTACACGAAGCA-1  | GSM4626767 | Normal |
| GSM4626767_GCAGTTACACTTGGAT-1  | GSM4626767 | Normal |
| GSM4626767_GCAGTTACAGTTCATG-1  | GSM4626767 | Normal |
| GSM4626767_GCAGTTACATCGGTTA-1  | GSM4626767 | Normal |
| GSM4626767_GCAGTTACATCTATGG-1  | GSM4626767 | Normal |
| GSM4626767_GCAGTTAGTATCAGTC-1  | GSM4626767 | Normal |
| GSM4626767_GCAGTTAGTCGCATAT-1  | GSM4626767 | Normal |
| GSM4626767_GCAGTTAGTTCCACGG-1  | GSM4626767 | Normal |
| GSM4626767_GCAGTTATCTCCTATA-1  | GSM4626767 | Normal |
| GSM4626767_GCATACAAGTTAGCGG-1  | GSM4626767 | Normal |
| GSM4626767_GCATACACACATGACT-1  | GSM4626767 | Normal |
| GSM4626767_GCATACACATAGTAAG-1  | GSM4626767 | Normal |
| GSM4626767_GCATACAGTAAGTTCC-1  | GSM4626767 | Normal |
| GSM4626767_GCATACAGTAGAAGGA-1  | GSM4626767 | Normal |
| GSM4626767_GCATACAGTATTCTCT-1  | GSM4626767 | Normal |
| GSM4626767_GCATACAGTCAGAAGC-1  | GSM4626767 | Normal |
| GSM4626767_GCATACAGTCTCCCTA-1  | GSM4626767 | Normal |
| GSM4626767_GCATACAGTTGATTGC-1  | GSM4626767 | Normal |
| GSM4626767_GCATACATCACGACTA-1  | GSM4626767 | Normal |
| GSM4626767_GCATACATCATGTCCC-1  | GSM4626767 | Normal |
| GSM4626767_GCATGATAGACCGGAT-1  | GSM4626767 | Normal |
| GSM4626767_GCATGATGTCACAAGG-1  | GSM4626767 | Normal |
| GSM4626767_GCATGATTCCGTAGGC-1  | GSM4626767 | Normal |
| GSM4626767_GCATGATTCTCTAGGA-1  | GSM4626767 | Normal |
| GSM4626767_GCATGATTCTGTCAAG-1  | GSM4626767 | Normal |
| GSM4626767_GCATGATTCTTCAACT-1  | GSM4626767 | Normal |
| GSM4626767_GCATGCGAGTACGTTT-1  | GSM4626767 | Normal |
| GSM4626767_GCATGCGAGTCGTA-1    | GSM4626767 | Normal |
| GSM4626767_GCATGCGAGTGGTAGC-1  | GSM4626767 | Normal |
| GSM4626767_GCATGCGAGTTACCCA-1  | GSM4626767 | Normal |
| GSM4626767_GCATGCGAGTTAGGTA-1  | GSM4626767 | Normal |
| GSM4626767_GCATGCGCAAGTACCT-1  | GSM4626767 | Normal |
| GSM4626767_GCATGCGCATACTACG-1  | GSM4626767 | Normal |
| GSM4626767_GCATGCGCATGAGCGA-1  | GSM4626767 | Normal |
| GSM4626767_GCATGCGTCCTTGACC-1  | GSM4626767 | Normal |
| GSM4626767_GCATGTAAGATGCCAG-1  | GSM4626767 | Normal |
| GSM4626767_GCATGTATCAGGCCCA-1  | GSM4626767 | Normal |
| GSM4626767_GCATGTATCATTGCGA-1  | GSM4626767 | Normal |
| GSM4626767_GCATGTATCCGCAGTG-1  | GSM4626767 | Normal |
| GSM4626767_GCATGTATCGGTTAAC-1  | GSM4626767 | Normal |
| GSM4626767_GCATGTATCTCGTTTA-1  | GSM4626767 | Normal |
| GSM4626767_GCCAAATAGATAGTCA-1  | GSM4626767 | Normal |
| GSM4626767_GCCAAATAGTACGACG-1  | GSM4626767 | Normal |
| GSM4626767_GCCAAATCAGTAACGG-1  | GSM4626767 | Normal |
| GSM4626767_GCCAAATCATCGATGT-1  | GSM4626767 | Normal |
| GSM4626767_GCCAAATGTACGCTGC-1  | GSM4626767 | Normal |

|                                |            |        |
|--------------------------------|------------|--------|
| GSM4626767_GCCAAATTCTGATACG-1  | GSM4626767 | Normal |
| GSM4626767_GCCTCTAAGTTAAGTG-1  | GSM4626767 | Normal |
| GSM4626767_GCCTCTACACACCGCA-1  | GSM4626767 | Normal |
| GSM4626767_GCCTCTACAGCTCGCA-1  | GSM4626767 | Normal |
| GSM4626767_GCCTCTACAGCTTAAC-1  | GSM4626767 | Normal |
| GSM4626767_GCCTCTACAGGCTGAA-1  | GSM4626767 | Normal |
| GSM4626767_GCCTCTACATCGGTTA-1  | GSM4626767 | Normal |
| GSM4626767_GCCTCTAGTACCGAGA-1  | GSM4626767 | Normal |
| GSM4626767_GCCTCTAGTTTAAGCC-1  | GSM4626767 | Normal |
| GSM4626767_GCCTCTATCGCCGTGA-1  | GSM4626767 | Normal |
| GSM4626767_GCGACCACAGGCTCAC-1  | GSM4626767 | Normal |
| GSM4626767_GCGACCACAGTCGTGC-1  | GSM4626767 | Normal |
| GSM4626767_GCGACCACATACGCTA-1  | GSM4626767 | Normal |
| GSM4626767_GCGACCAGTGTGACGA-1  | GSM4626767 | Normal |
| GSM4626767_GCGACCAGTTACGGAG-1  | GSM4626767 | Normal |
| GSM4626767_GCGACCATCCGCAGTG-1  | GSM4626767 | Normal |
| GSM4626767_GCGACCATCTTTAGGG-1  | GSM4626767 | Normal |
| GSM4626767_GCGAGAAAGCCAGTTT-1  | GSM4626767 | Normal |
| GSM4626767_GCGAGAAAGTGGGTTG-1  | GSM4626767 | Normal |
| GSM4626767_GCGAGAACACCTTGTC-1  | GSM4626767 | Normal |
| GSM4626767_GCGAGAAGTACCATCA-1  | GSM4626767 | Normal |
| GSM4626767_GCGAGAATCCAAGCCG-1  | GSM4626767 | Normal |
| GSM4626767_GCGAGAATCGTTGACA-1  | GSM4626767 | Normal |
| GSM4626767_GCGAGAATCGTTTAGG-1  | GSM4626767 | Normal |
| GSM4626767_GCGCAACAGACTACAA-1  | GSM4626767 | Normal |
| GSM4626767_GCGCAACAGGGTATCG-1  | GSM4626767 | Normal |
| GSM4626767_GCGCAACCACTGTTAG-1  | GSM4626767 | Normal |
| GSM4626767_GCGCAACCATCACAAAC-1 | GSM4626767 | Normal |
| GSM4626767_GCGCAACCATGCCTTC-1  | GSM4626767 | Normal |
| GSM4626767_GCGCAACCATTCCTCG-1  | GSM4626767 | Normal |
| GSM4626767_GCGCAACCATTCCTAC-1  | GSM4626767 | Normal |
| GSM4626767_GCGCAACGTTCAGGCC-1  | GSM4626767 | Normal |
| GSM4626767_GCGCAACTCCAAACAC-1  | GSM4626767 | Normal |
| GSM4626767_GCGCAACTCCGTAGTA-1  | GSM4626767 | Normal |
| GSM4626767_GCGCAACTCGCGTTTC-1  | GSM4626767 | Normal |
| GSM4626767_GCGCAACTCGGCTTGG-1  | GSM4626767 | Normal |
| GSM4626767_GCGCAGTAGATGGGTC-1  | GSM4626767 | Normal |
| GSM4626767_GCGCAGTCAAAGTGCG-1  | GSM4626767 | Normal |
| GSM4626767_GCGCAGTCAATGGTCT-1  | GSM4626767 | Normal |
| GSM4626767_GCGCAGTCAATTGCTG-1  | GSM4626767 | Normal |
| GSM4626767_GCGCAGTGTCGAATCT-1  | GSM4626767 | Normal |
| GSM4626767_GCGCAGTGTGTAATGA-1  | GSM4626767 | Normal |
| GSM4626767_GCGCAGTTCAAAGACA-1  | GSM4626767 | Normal |
| GSM4626767_GCGCAGTTCATGTCCC-1  | GSM4626767 | Normal |
| GSM4626767_GCGCAGTTCGTTTGCC-1  | GSM4626767 | Normal |
| GSM4626767_GCGCAGTTCCTAACGGT-1 | GSM4626767 | Normal |
| GSM4626767_GCGCCAAAGGCAGTCA-1  | GSM4626767 | Normal |
| GSM4626767_GCGCCAACAAGCCGTC-1  | GSM4626767 | Normal |
| GSM4626767_GCGCCAACACATAACC-1  | GSM4626767 | Normal |
| GSM4626767_GCGCCAAGTCGAATCT-1  | GSM4626767 | Normal |
| GSM4626767_GCGCCAATCAGCGCAA-1  | GSM4626767 | Normal |
| GSM4626767_GCGCGATAGAGCTGGT-1  | GSM4626767 | Normal |
| GSM4626767_GCGCGATAGCCAGTAG-1  | GSM4626767 | Normal |
| GSM4626767_GCGCGATAGGGAGTAA-1  | GSM4626767 | Normal |
| GSM4626767_GCGCGATAGTGTTCG-1   | GSM4626767 | Normal |
| GSM4626767_GCGCGATCACCTCGGA-1  | GSM4626767 | Normal |
| GSM4626767_GCGCGATTCACTACT-1   | GSM4626767 | Normal |

|                                |            |        |
|--------------------------------|------------|--------|
| GSM4626767_GCGGGTTAGCAATATG-1  | GSM4626767 | Normal |
| GSM4626767_GCGGGTTAGCGTAGTG-1  | GSM4626767 | Normal |
| GSM4626767_GCGGGTTCACCGAATT-1  | GSM4626767 | Normal |
| GSM4626767_GCGGGTTGTAAACGCG-1  | GSM4626767 | Normal |
| GSM4626767_GCGGGTTGTAGAAAGG-1  | GSM4626767 | Normal |
| GSM4626767_GCGGGTTGTAGCGATG-1  | GSM4626767 | Normal |
| GSM4626767_GCGGGTTGTCATACTG-1  | GSM4626767 | Normal |
| GSM4626767_GCGGGTTGTGTTTGTG-1  | GSM4626767 | Normal |
| GSM4626767_GCGGGTTTCGTAGATC-1  | GSM4626767 | Normal |
| GSM4626767_GCGGGTTTCTCTTATG-1  | GSM4626767 | Normal |
| GSM4626767_GCTCCTAAGAGCAATT-1  | GSM4626767 | Normal |
| GSM4626767_GCTCCTAAGCCCAACC-1  | GSM4626767 | Normal |
| GSM4626767_GCTCCTAAGTCTCGGC-1  | GSM4626767 | Normal |
| GSM4626767_GCTCCTACAAACCTAC-1  | GSM4626767 | Normal |
| GSM4626767_GCTCCTACAGCTGCAC-1  | GSM4626767 | Normal |
| GSM4626767_GCTCCTACATATGAGA-1  | GSM4626767 | Normal |
| GSM4626767_GCTCCTACATGGTCTA-1  | GSM4626767 | Normal |
| GSM4626767_GCTCCTAGTGAAAGAG-1  | GSM4626767 | Normal |
| GSM4626767_GCTCCTATCAACACGT-1  | GSM4626767 | Normal |
| GSM4626767_GCTCCTATCTTGTCAT-1  | GSM4626767 | Normal |
| GSM4626767_GCTCTGTAGAGAGCTC-1  | GSM4626767 | Normal |
| GSM4626767_GCTCTGTAGGAGCGTT-1  | GSM4626767 | Normal |
| GSM4626767_GCTCTGTAGTACACCT-1  | GSM4626767 | Normal |
| GSM4626767_GCTCTGTGTGGTCCGT-1  | GSM4626767 | Normal |
| GSM4626767_GCTCTGTGTGCAATC-1   | GSM4626767 | Normal |
| GSM4626767_GCTCTGTTCTGTCTAT-1  | GSM4626767 | Normal |
| GSM4626767_GCTGCAGAGACCACGA-1  | GSM4626767 | Normal |
| GSM4626767_GCTGCAGCAGCGTCCA-1  | GSM4626767 | Normal |
| GSM4626767_GCTGCAGCAGCTGTGC-1  | GSM4626767 | Normal |
| GSM4626767_GCTGCAGCAGGTCCAC-1  | GSM4626767 | Normal |
| GSM4626767_GCTGCAGTCTATCCTA-1  | GSM4626767 | Normal |
| GSM4626767_GCTGCGAAGGGCTTCC-1  | GSM4626767 | Normal |
| GSM4626767_GCTGCGAAGGGTGTGT-1  | GSM4626767 | Normal |
| GSM4626767_GCTGCGACAACCTTGAC-1 | GSM4626767 | Normal |
| GSM4626767_GCTGCGAGTATATGAG-1  | GSM4626767 | Normal |
| GSM4626767_GCTGCGAGTCACTTCC-1  | GSM4626767 | Normal |
| GSM4626767_GCTGCGAGTGACCAAG-1  | GSM4626767 | Normal |
| GSM4626767_GCTGCGATCCGTAGGC-1  | GSM4626767 | Normal |
| GSM4626767_GCTGCTTAGACAAAGG-1  | GSM4626767 | Normal |
| GSM4626767_GCTGCTTAGACAATAC-1  | GSM4626767 | Normal |
| GSM4626767_GCTGCTTAGAGCTGCA-1  | GSM4626767 | Normal |
| GSM4626767_GCTGCTTAGCCACGCT-1  | GSM4626767 | Normal |
| GSM4626767_GCTGCTTAGGGAACGG-1  | GSM4626767 | Normal |
| GSM4626767_GCTGCTTACCAGGTC-1   | GSM4626767 | Normal |
| GSM4626767_GCTGCTTACAGCTGTAT-1 | GSM4626767 | Normal |
| GSM4626767_GCTGCTTACAGTGAGTG-1 | GSM4626767 | Normal |
| GSM4626767_GCTGCTTACAGTGGAT-1  | GSM4626767 | Normal |
| GSM4626767_GCTGCTTCATCTCCCA-1  | GSM4626767 | Normal |
| GSM4626767_GCTGCTTTCAGTACGT-1  | GSM4626767 | Normal |
| GSM4626767_GCTGCTTTCCAAACAC-1  | GSM4626767 | Normal |
| GSM4626767_GCTGCTTTCGCGCCAA-1  | GSM4626767 | Normal |
| GSM4626767_GCTGGGTAGTGTACGG-1  | GSM4626767 | Normal |
| GSM4626767_GCTGGGTAGTGTCCCG-1  | GSM4626767 | Normal |
| GSM4626767_GCTGGGTACAGACGCCT-1 | GSM4626767 | Normal |
| GSM4626767_GCTGGGTACAGACGTAG-1 | GSM4626767 | Normal |
| GSM4626767_GCTGGGTACAGCTTCGG-1 | GSM4626767 | Normal |
| GSM4626767_GCTGGGTACAGTCA-1    | GSM4626767 | Normal |

|                                |            |        |
|--------------------------------|------------|--------|
| GSM4626767_GCTGGGTGTAAGGGCT-1  | GSM4626767 | Normal |
| GSM4626767_GCTGGGTTCCCTAACC-1  | GSM4626767 | Normal |
| GSM4626767_GCTGGGTTCTGTAGA-1   | GSM4626767 | Normal |
| GSM4626767_GCTTCCAAGCTGCCCA-1  | GSM4626767 | Normal |
| GSM4626767_GCTTCCAAGTACGCGA-1  | GSM4626767 | Normal |
| GSM4626767_GCTTCCACAAATCCGT-1  | GSM4626767 | Normal |
| GSM4626767_GCTTCCACAAGCGATG-1  | GSM4626767 | Normal |
| GSM4626767_GCTTCCAGTAGCTAAA-1  | GSM4626767 | Normal |
| GSM4626767_GCTTCCAGTGACAAAT-1  | GSM4626767 | Normal |
| GSM4626767_GCTTCCATCAAAGACA-1  | GSM4626767 | Normal |
| GSM4626767_GCTTCCATCTTAACCT-1  | GSM4626767 | Normal |
| GSM4626767_GCTTGAAAGGCATTGG-1  | GSM4626767 | Normal |
| GSM4626767_GCTTGAAAGTTTCGCGC-1 | GSM4626767 | Normal |
| GSM4626767_GCTTGAACAAGCTGAG-1  | GSM4626767 | Normal |
| GSM4626767_GCTTGAACAAGGCTCC-1  | GSM4626767 | Normal |
| GSM4626767_GCTTGAACACACCGCA-1  | GSM4626767 | Normal |
| GSM4626767_GCTTGAAGTAGAGGAA-1  | GSM4626767 | Normal |
| GSM4626767_GCTTGAATCAGAGACG-1  | GSM4626767 | Normal |
| GSM4626767_GCTTGAATCGGCCGAT-1  | GSM4626767 | Normal |
| GSM4626767_GGAAAGCAGGACTGGT-1  | GSM4626767 | Normal |
| GSM4626767_GGAAAGCAGTGTGAAT-1  | GSM4626767 | Normal |
| GSM4626767_GGAAAGCCACCTCGTT-1  | GSM4626767 | Normal |
| GSM4626767_GGAAAGCCATACTACG-1  | GSM4626767 | Normal |
| GSM4626767_GGAAAGCCATTGCGGC-1  | GSM4626767 | Normal |
| GSM4626767_GGAAAGCGTCTTGCGG-1  | GSM4626767 | Normal |
| GSM4626767_GGAAAGCGTGCGATAG-1  | GSM4626767 | Normal |
| GSM4626767_GGAAAGCTCCTTGCCA-1  | GSM4626767 | Normal |
| GSM4626767_GGAAAGCTCGGAAACG-1  | GSM4626767 | Normal |
| GSM4626767_GGAAAGCTCTTAGCCC-1  | GSM4626767 | Normal |
| GSM4626767_GGAACTTACCACCAG-1   | GSM4626767 | Normal |
| GSM4626767_GGAACTTCACTCTGTC-1  | GSM4626767 | Normal |
| GSM4626767_GGAACTTCATCTATGG-1  | GSM4626767 | Normal |
| GSM4626767_GGAACTTGTGTGACGA-1  | GSM4626767 | Normal |
| GSM4626767_GGAACTTTCGTGGGAA-1  | GSM4626767 | Normal |
| GSM4626767_GGAACTTTCTTGACGA-1  | GSM4626767 | Normal |
| GSM4626767_GGAATAAAGCAACGGT-1  | GSM4626767 | Normal |
| GSM4626767_GGAATAAAGTGGCACA-1  | GSM4626767 | Normal |
| GSM4626767_GGAATAACACAGCCCA-1  | GSM4626767 | Normal |
| GSM4626767_GGAATAACACTTCGAA-1  | GSM4626767 | Normal |
| GSM4626767_GGAATAATCAACGAAA-1  | GSM4626767 | Normal |
| GSM4626767_GGAATAATCATCATT-1   | GSM4626767 | Normal |
| GSM4626767_GGAATAATCCCAACGG-1  | GSM4626767 | Normal |
| GSM4626767_GGAATAATCGTCTGAA-1  | GSM4626767 | Normal |
| GSM4626767_GGAATAATCTGACCTC-1  | GSM4626767 | Normal |
| GSM4626767_GGACAAGCACTTACGA-1  | GSM4626767 | Normal |
| GSM4626767_GGACAAGCATAAGACA-1  | GSM4626767 | Normal |
| GSM4626767_GGACAAGGTCTTGATG-1  | GSM4626767 | Normal |
| GSM4626767_GGACAAGGTGTCGCTG-1  | GSM4626767 | Normal |
| GSM4626767_GGACAAGTCAAACCAC-1  | GSM4626767 | Normal |
| GSM4626767_GGACAAGTCACAACGT-1  | GSM4626767 | Normal |
| GSM4626767_GGACAAGTCACTTACT-1  | GSM4626767 | Normal |
| GSM4626767_GGACAAGTCCGCTGTT-1  | GSM4626767 | Normal |
| GSM4626767_GGACAAGTCTACCTGC-1  | GSM4626767 | Normal |
| GSM4626767_GGACAGAAGATATGCA-1  | GSM4626767 | Normal |
| GSM4626767_GGACAGAAGATGGCGT-1  | GSM4626767 | Normal |
| GSM4626767_GGACAGAAGCAGATCG-1  | GSM4626767 | Normal |

|                                |            |        |
|--------------------------------|------------|--------|
| GSM4626767_GGACAGAAGCTTCGCG-1  | GSM4626767 | Normal |
| GSM4626767_GGACAGACAAGGACTG-1  | GSM4626767 | Normal |
| GSM4626767_GGACAGACAATCGAAA-1  | GSM4626767 | Normal |
| GSM4626767_GGACAGACAGCTGTTA-1  | GSM4626767 | Normal |
| GSM4626767_GGACAGACATGGGAAC-1  | GSM4626767 | Normal |
| GSM4626767_GGACAGAGTCGGGTCT-1  | GSM4626767 | Normal |
| GSM4626767_GGACAGATCAGGTTCA-1  | GSM4626767 | Normal |
| GSM4626767_GGACAGATCCGTTGCT-1  | GSM4626767 | Normal |
| GSM4626767_GGACATTAGAACAATC-1  | GSM4626767 | Normal |
| GSM4626767_GGACATTAGGGTCTCC-1  | GSM4626767 | Normal |
| GSM4626767_GGACATTGTAGGAGTC-1  | GSM4626767 | Normal |
| GSM4626767_GGACATTTCAAAACC-1   | GSM4626767 | Normal |
| GSM4626767_GGACATTTCCGGTCCGA-1 | GSM4626767 | Normal |
| GSM4626767_GGACATTTCTGGCGTG-1  | GSM4626767 | Normal |
| GSM4626767_GGACGTCGTAGCGTGA-1  | GSM4626767 | Normal |
| GSM4626767_GGACGTCGTATTAGCC-1  | GSM4626767 | Normal |
| GSM4626767_GGACGTCTCGAACTGT-1  | GSM4626767 | Normal |
| GSM4626767_GGACGTCTCGGTCCGA-1  | GSM4626767 | Normal |
| GSM4626767_GGACGTCTCTACTTAC-1  | GSM4626767 | Normal |
| GSM4626767_GGACGTCTCTCAAACG-1  | GSM4626767 | Normal |
| GSM4626767_GGAGCAAAGAACAATC-1  | GSM4626767 | Normal |
| GSM4626767_GGAGCAAAGAGCTTCT-1  | GSM4626767 | Normal |
| GSM4626767_GGAGCAAACAAGTCTA-1  | GSM4626767 | Normal |
| GSM4626767_GGAGCAACAGTATGCT-1  | GSM4626767 | Normal |
| GSM4626767_GGAGCAACATCGATTG-1  | GSM4626767 | Normal |
| GSM4626767_GGAGCAACATGGTTGT-1  | GSM4626767 | Normal |
| GSM4626767_GGAGCAAGTACACCGC-1  | GSM4626767 | Normal |
| GSM4626767_GGAGCAAGTACGAAAT-1  | GSM4626767 | Normal |
| GSM4626767_GGAGCAAGTCAGATAA-1  | GSM4626767 | Normal |
| GSM4626767_GGAGCAATCTGCTTGC-1  | GSM4626767 | Normal |
| GSM4626767_GGATGTTAGAATAGGG-1  | GSM4626767 | Normal |
| GSM4626767_GGATGTTAGCCAGTAG-1  | GSM4626767 | Normal |
| GSM4626767_GGATGTTAGGGCTCTC-1  | GSM4626767 | Normal |
| GSM4626767_GGATGTTCACTGTCGG-1  | GSM4626767 | Normal |
| GSM4626767_GGATGTTTCATGCTAGT-1 | GSM4626767 | Normal |
| GSM4626767_GGATGTTGTTTCCACC-1  | GSM4626767 | Normal |
| GSM4626767_GGATGTTTCAGGTAAA-1  | GSM4626767 | Normal |
| GSM4626767_GGATGTTTCCGCGTTT-1  | GSM4626767 | Normal |
| GSM4626767_GGATGTTTCTTAGAGC-1  | GSM4626767 | Normal |
| GSM4626767_GGATTACAGTACGTTT-1  | GSM4626767 | Normal |
| GSM4626767_GGATTACCAAAGTGCG-1  | GSM4626767 | Normal |
| GSM4626767_GGATTACAGCCAGAA-1   | GSM4626767 | Normal |
| GSM4626767_GGATTACGTCAGAGGT-1  | GSM4626767 | Normal |
| GSM4626767_GGATTACGTTACCGAT-1  | GSM4626767 | Normal |
| GSM4626767_GGATTACGTTTGTGG-1   | GSM4626767 | Normal |
| GSM4626767_GGATTACTCAACGCTA-1  | GSM4626767 | Normal |
| GSM4626767_GGATTACTCGAGCCCA-1  | GSM4626767 | Normal |
| GSM4626767_GGCAATTAGATGGCGT-1  | GSM4626767 | Normal |
| GSM4626767_GGCAATTAGTGGTCCC-1  | GSM4626767 | Normal |
| GSM4626767_GGCAATTCACCTTGTC-1  | GSM4626767 | Normal |
| GSM4626767_GGCAATTGTGCTCTTC-1  | GSM4626767 | Normal |
| GSM4626767_GGCAATTGTTACTGAC-1  | GSM4626767 | Normal |
| GSM4626767_GGCAATTTCAACGGGA-1  | GSM4626767 | Normal |
| GSM4626767_GGCAATTTCCAAATGC-1  | GSM4626767 | Normal |
| GSM4626767_GGCCGATAGAGCCCAA-1  | GSM4626767 | Normal |
| GSM4626767_GGCCGATAGCTAGTGG-1  | GSM4626767 | Normal |
| GSM4626767_GGCCGATAGGATGTAT-1  | GSM4626767 | Normal |

|                                |            |        |
|--------------------------------|------------|--------|
| GSM4626767_GGCCGATCACCATCCT-1  | GSM4626767 | Normal |
| GSM4626767_GGCCGATCATGGATGG-1  | GSM4626767 | Normal |
| GSM4626767_GGCCGATCATTAGGCT-1  | GSM4626767 | Normal |
| GSM4626767_GGCCGATGTCGATTGT-1  | GSM4626767 | Normal |
| GSM4626767_GGCCGATTCCGCTGTT-1  | GSM4626767 | Normal |
| GSM4626767_GGCCGATTCTCACATT-1  | GSM4626767 | Normal |
| GSM4626767_GGCCGATTCTGAGTGT-1  | GSM4626767 | Normal |
| GSM4626767_GGCGACTAGCCACCTG-1  | GSM4626767 | Normal |
| GSM4626767_GGCGACTAGGGCTTGA-1  | GSM4626767 | Normal |
| GSM4626767_GGCGACTCACAGACTT-1  | GSM4626767 | Normal |
| GSM4626767_GGCGACTCAGTCACTA-1  | GSM4626767 | Normal |
| GSM4626767_GGCGACTCATGCCACG-1  | GSM4626767 | Normal |
| GSM4626767_GGCGACTTCGTCTGAA-1  | GSM4626767 | Normal |
| GSM4626767_GGCGTGTAGAGGGCTT-1  | GSM4626767 | Normal |
| GSM4626767_GGCGTGTAGGTGATTA-1  | GSM4626767 | Normal |
| GSM4626767_GGCGTGTACAACGTT-1   | GSM4626767 | Normal |
| GSM4626767_GGCGTGTCAAGTCCCT-1  | GSM4626767 | Normal |
| GSM4626767_GGCGTGTATGTAGTC-1   | GSM4626767 | Normal |
| GSM4626767_GGCGTGTTCAGGCAAG-1  | GSM4626767 | Normal |
| GSM4626767_GGCGTGTTCGGCACA-1   | GSM4626767 | Normal |
| GSM4626767_GGCGTGTTCGGCCGAT-1  | GSM4626767 | Normal |
| GSM4626767_GGCGTGTCTACTCAT-1   | GSM4626767 | Normal |
| GSM4626767_GGCGTGTCTCGGACG-1   | GSM4626767 | Normal |
| GSM4626767_GGCGTGTCTTCGGTC-1   | GSM4626767 | Normal |
| GSM4626767_GGCTCGACATCTACGA-1  | GSM4626767 | Normal |
| GSM4626767_GGCTCGACATGCCCGA-1  | GSM4626767 | Normal |
| GSM4626767_GGCTCGACATTCTCAT-1  | GSM4626767 | Normal |
| GSM4626767_GGCTCGAGTCACTTCC-1  | GSM4626767 | Normal |
| GSM4626767_GGCTCGATCCAGGGCT-1  | GSM4626767 | Normal |
| GSM4626767_GGCTGGTAGTGTAAT-1   | GSM4626767 | Normal |
| GSM4626767_GGCTGGTGTAGCTTGT-1  | GSM4626767 | Normal |
| GSM4626767_GGCTGGTCTCTGAGA-1   | GSM4626767 | Normal |
| GSM4626767_GGGAATGAGGGTATCG-1  | GSM4626767 | Normal |
| GSM4626767_GGGAATGCATACTTT-1   | GSM4626767 | Normal |
| GSM4626767_GGGAATGGTAAAGGAG-1  | GSM4626767 | Normal |
| GSM4626767_GGGAATGGTCTAACGT-1  | GSM4626767 | Normal |
| GSM4626767_GGGAATGTCAAGATCC-1  | GSM4626767 | Normal |
| GSM4626767_GGGAATGTCCTAAGTG-1  | GSM4626767 | Normal |
| GSM4626767_GGGAATGTCTACCAGA-1  | GSM4626767 | Normal |
| GSM4626767_GGGACCTAGAAACCAT-1  | GSM4626767 | Normal |
| GSM4626767_GGGACCTAGAGGGATA-1  | GSM4626767 | Normal |
| GSM4626767_GGGACCTCAGATCTGT-1  | GSM4626767 | Normal |
| GSM4626767_GGGACCTCATGTTCCC-1  | GSM4626767 | Normal |
| GSM4626767_GGGACCTGTAGCCTCG-1  | GSM4626767 | Normal |
| GSM4626767_GGGACCTGTCACACGC-1  | GSM4626767 | Normal |
| GSM4626767_GGGACCTTCAACACTG-1  | GSM4626767 | Normal |
| GSM4626767_GGGACCTTCAACCAAC-1  | GSM4626767 | Normal |
| GSM4626767_GGGACCTTCATTTGGG-1  | GSM4626767 | Normal |
| GSM4626767_GGGACCTTCGTCCGTT-1  | GSM4626767 | Normal |
| GSM4626767_GGGAGATCAAGTCATC-1  | GSM4626767 | Normal |
| GSM4626767_GGGAGATCAAGTCTGT-1  | GSM4626767 | Normal |
| GSM4626767_GGGAGATCAGACGCAA-1  | GSM4626767 | Normal |
| GSM4626767_GGGAGATCAGATCGGA-1  | GSM4626767 | Normal |
| GSM4626767_GGGAGATCATGTTCGA-1  | GSM4626767 | Normal |
| GSM4626767_GGGAGATTCAAGCGACC-1 | GSM4626767 | Normal |
| GSM4626767_GGGATGAAGCTAGCCC-1  | GSM4626767 | Normal |
| GSM4626767_GGGATGAAGTACACCT-1  | GSM4626767 | Normal |

|                                |            |        |
|--------------------------------|------------|--------|
| GSM4626767_GGGATGAAGTGTTTGC-1  | GSM4626767 | Normal |
| GSM4626767_GGGATGACACCAGATT-1  | GSM4626767 | Normal |
| GSM4626767_GGGATGACATTGGCGC-1  | GSM4626767 | Normal |
| GSM4626767_GGGATGAGTCATCCCT-1  | GSM4626767 | Normal |
| GSM4626767_GGGATGATCAACACTG-1  | GSM4626767 | Normal |
| GSM4626767_GGGATGATCGATAGAA-1  | GSM4626767 | Normal |
| GSM4626767_GGGATGATCTTGCAAG-1  | GSM4626767 | Normal |
| GSM4626767_GGGCACTAGCATCATC-1  | GSM4626767 | Normal |
| GSM4626767_GGGCACTCAAAGGAAG-1  | GSM4626767 | Normal |
| GSM4626767_GGGCACTCAATGCCAT-1  | GSM4626767 | Normal |
| GSM4626767_GGGCACTCACGAAACG-1  | GSM4626767 | Normal |
| GSM4626767_GGGCACTCATGCTGGC-1  | GSM4626767 | Normal |
| GSM4626767_GGGCACTGTGCGAAAC-1  | GSM4626767 | Normal |
| GSM4626767_GGGCACTTCGGCGCTA-1  | GSM4626767 | Normal |
| GSM4626767_GGGCATCAGTCATCCA-1  | GSM4626767 | Normal |
| GSM4626767_GGGCATCAGTGAATTG-1  | GSM4626767 | Normal |
| GSM4626767_GGGCATCAGTTACCCA-1  | GSM4626767 | Normal |
| GSM4626767_GGGCATCCACCTGGTG-1  | GSM4626767 | Normal |
| GSM4626767_GGGCATCCAGACACTT-1  | GSM4626767 | Normal |
| GSM4626767_GGGCATCCAGCCACCA-1  | GSM4626767 | Normal |
| GSM4626767_GGGCATCGTAGGACAC-1  | GSM4626767 | Normal |
| GSM4626767_GGGCATCGTCACCTAA-1  | GSM4626767 | Normal |
| GSM4626767_GGGCATCTCATGCAAC-1  | GSM4626767 | Normal |
| GSM4626767_GGGCATCTCGGTCTAA-1  | GSM4626767 | Normal |
| GSM4626767_GGGCATCTCTTTCCTC-1  | GSM4626767 | Normal |
| GSM4626767_GGGTCTGAGACACTAA-1  | GSM4626767 | Normal |
| GSM4626767_GGGTCTGAGAGCAATT-1  | GSM4626767 | Normal |
| GSM4626767_GGGTCTGAGCACAGGT-1  | GSM4626767 | Normal |
| GSM4626767_GGGTCTGAGCAGGTCA-1  | GSM4626767 | Normal |
| GSM4626767_GGGTCTGAGCCACGTC-1  | GSM4626767 | Normal |
| GSM4626767_GGGTCTGAGCTAAGAT-1  | GSM4626767 | Normal |
| GSM4626767_GGGTCTGCAATCACAC-1  | GSM4626767 | Normal |
| GSM4626767_GGGTCTGCACTTCGAA-1  | GSM4626767 | Normal |
| GSM4626767_GGGTCTGCATGTCCTC-1  | GSM4626767 | Normal |
| GSM4626767_GGGTCTGGTGCAGACA-1  | GSM4626767 | Normal |
| GSM4626767_GGGTCTGTCGGCATCG-1  | GSM4626767 | Normal |
| GSM4626767_GGGTCTGTCGGCTTGG-1  | GSM4626767 | Normal |
| GSM4626767_GGGTTGCAGTACATGA-1  | GSM4626767 | Normal |
| GSM4626767_GGGTTGCCAATCGAAA-1  | GSM4626767 | Normal |
| GSM4626767_GGGTTGCCAGAGCCAA-1  | GSM4626767 | Normal |
| GSM4626767_GGGTTGCTCAAAGTAG-1  | GSM4626767 | Normal |
| GSM4626767_GGGTTGCTCCTTCTC-1   | GSM4626767 | Normal |
| GSM4626767_GGTATTGAGACCCACC-1  | GSM4626767 | Normal |
| GSM4626767_GGTATTGAGAGCTTCT-1  | GSM4626767 | Normal |
| GSM4626767_GGTATTGAGAGGTACC-1  | GSM4626767 | Normal |
| GSM4626767_GGTATTGAGATAGCAT-1  | GSM4626767 | Normal |
| GSM4626767_GGTATTGAGGCGATAC-1  | GSM4626767 | Normal |
| GSM4626767_GGTATTGGTAGGACAC-1  | GSM4626767 | Normal |
| GSM4626767_GGTATTGTCACTTATC-1  | GSM4626767 | Normal |
| GSM4626767_GGTATTGTCACTCCCT-1  | GSM4626767 | Normal |
| GSM4626767_GGTATTGTCTCTGCC-1   | GSM4626767 | Normal |
| GSM4626767_GGTATTGTCCCCTTG-1   | GSM4626767 | Normal |
| GSM4626767_GGTATTGTTCGATGAGG-1 | GSM4626767 | Normal |
| GSM4626767_GGTGAAGAGAATGTGT-1  | GSM4626767 | Normal |
| GSM4626767_GGTGAAGAGAGCTGCA-1  | GSM4626767 | Normal |
| GSM4626767_GGTGAAGAGGTCATCT-1  | GSM4626767 | Normal |
| GSM4626767_GGTGAAGCACCGCTAG-1  | GSM4626767 | Normal |



|                                |            |        |
|--------------------------------|------------|--------|
| GSM4626767_GGTGAAGGTAGGGACT-1  | GSM4626767 | Normal |
| GSM4626767_GGTGCGTAGAATTGTG-1  | GSM4626767 | Normal |
| GSM4626767_GGTGCGTCAGATCCAT-1  | GSM4626767 | Normal |
| GSM4626767_GGTGCGTCATCCCATC-1  | GSM4626767 | Normal |
| GSM4626767_GGTGCGTGTGCACTTA-1  | GSM4626767 | Normal |
| GSM4626767_GGTGCGTTCAGAGACG-1  | GSM4626767 | Normal |
| GSM4626767_GGTGCGTTCGTGGGAA-1  | GSM4626767 | Normal |
| GSM4626767_GGTGCGTTCCTAACCT-1  | GSM4626767 | Normal |
| GSM4626767_GGTGTTACAAAGGAAG-1  | GSM4626767 | Normal |
| GSM4626767_GGTGTTAGTGTGCCTG-1  | GSM4626767 | Normal |
| GSM4626767_GGTGTTATCCTGTAGA-1  | GSM4626767 | Normal |
| GSM4626767_GGTGTTATCTTCGAGA-1  | GSM4626767 | Normal |
| GSM4626767_GTAACGTCATGTCCTC-1  | GSM4626767 | Normal |
| GSM4626767_GTAACGTGTATATGGA-1  | GSM4626767 | Normal |
| GSM4626767_GTAACGTGTCGCATAT-1  | GSM4626767 | Normal |
| GSM4626767_GTAACGTTTCAGTTTGG-1 | GSM4626767 | Normal |
| GSM4626767_GTAACGTTCTGTAGA-1   | GSM4626767 | Normal |
| GSM4626767_GTAACTGAGGATGCGT-1  | GSM4626767 | Normal |
| GSM4626767_GTAACTGCAAGAGTCG-1  | GSM4626767 | Normal |
| GSM4626767_GTAACTGCAATAGCGG-1  | GSM4626767 | Normal |
| GSM4626767_GTAACTGCATGGATGG-1  | GSM4626767 | Normal |
| GSM4626767_GTAACTGCATTGTGCA-1  | GSM4626767 | Normal |
| GSM4626767_GTAACTGGTAATCGTC-1  | GSM4626767 | Normal |
| GSM4626767_GTAACTGGTACCGCTG-1  | GSM4626767 | Normal |
| GSM4626767_GTAACTGGTATTCTCT-1  | GSM4626767 | Normal |
| GSM4626767_GTAACTGGTGGTGTAG-1  | GSM4626767 | Normal |
| GSM4626767_GTAACTGTCAAAGACA-1  | GSM4626767 | Normal |
| GSM4626767_GTAACTGTCGTGGACC-1  | GSM4626767 | Normal |
| GSM4626767_GTACGTAAGACAATAC-1  | GSM4626767 | Normal |
| GSM4626767_GTACGTAAGGAATGGA-1  | GSM4626767 | Normal |
| GSM4626767_GTACGTAAGTAGGCCA-1  | GSM4626767 | Normal |
| GSM4626767_GTACGTAGTTGGTGG-1   | GSM4626767 | Normal |
| GSM4626767_GTACGTATCCACGAAT-1  | GSM4626767 | Normal |
| GSM4626767_GTACTCCAGTCAAGGC-1  | GSM4626767 | Normal |
| GSM4626767_GTACTCCAGTGAACGC-1  | GSM4626767 | Normal |
| GSM4626767_GTACTCCCAATGTAAG-1  | GSM4626767 | Normal |
| GSM4626767_GTACTCCCATATGCTG-1  | GSM4626767 | Normal |
| GSM4626767_GTACTCCGTACAGTGG-1  | GSM4626767 | Normal |
| GSM4626767_GTACTCCGTGCGATAT-1  | GSM4626767 | Normal |
| GSM4626767_GTACTCCGTCTAGCGC-1  | GSM4626767 | Normal |
| GSM4626767_GTACTCCGTGACGCCT-1  | GSM4626767 | Normal |
| GSM4626767_GTACTCCGTGACTCAT-1  | GSM4626767 | Normal |
| GSM4626767_GTACTCCGTGCGAAAC-1  | GSM4626767 | Normal |
| GSM4626767_GTACTCCGTGGGTATG-1  | GSM4626767 | Normal |
| GSM4626767_GTACTCCGTGGTCCGT-1  | GSM4626767 | Normal |
| GSM4626767_GTACTCCGTGTCTGAT-1  | GSM4626767 | Normal |
| GSM4626767_GTACTCCTCACGCATA-1  | GSM4626767 | Normal |
| GSM4626767_GTACTCCTCATGCATG-1  | GSM4626767 | Normal |
| GSM4626767_GTACTCCTCCGTTGTC-1  | GSM4626767 | Normal |
| GSM4626767_GTACTCCTCGGCGGTT-1  | GSM4626767 | Normal |
| GSM4626767_GTACTTTTCAGATCGGA-1 | GSM4626767 | Normal |
| GSM4626767_GTACTTTTCAGGAACGT-1 | GSM4626767 | Normal |
| GSM4626767_GTACTTTGTATAATGG-1  | GSM4626767 | Normal |
| GSM4626767_GTACTTTTCCCTCAGT-1  | GSM4626767 | Normal |
| GSM4626767_GTAGGCCGTCAATACC-1  | GSM4626767 | Normal |
| GSM4626767_GTAGGCCGTGATGTCT-1  | GSM4626767 | Normal |
| GSM4626767_GTAGGCCGTTCTGAAC-1  | GSM4626767 | Normal |

|                               |            |        |
|-------------------------------|------------|--------|
| GSM4626767_GTAGGCCTCACGCATA-1 | GSM4626767 | Normal |
| GSM4626767_GTAGGCCTCCGAAGAG-1 | GSM4626767 | Normal |
| GSM4626767_GTAGGCCTCTGCTGTC-1 | GSM4626767 | Normal |
| GSM4626767_GTAGGCCTCTTAGAGC-1 | GSM4626767 | Normal |
| GSM4626767_GTAGTCACATCTCCCA-1 | GSM4626767 | Normal |
| GSM4626767_GTAGTCAGTGGTACAG-1 | GSM4626767 | Normal |
| GSM4626767_GTATCTTAGAGGTTGC-1 | GSM4626767 | Normal |
| GSM4626767_GTATCTTAGCCCAGCT-1 | GSM4626767 | Normal |
| GSM4626767_GTATCTTGTAAGGGAA-1 | GSM4626767 | Normal |
| GSM4626767_GTATCTTGATATGAG-1  | GSM4626767 | Normal |
| GSM4626767_GTATCTTCAAGGTAA-1  | GSM4626767 | Normal |
| GSM4626767_GTATCTTTCGTCTGAA-1 | GSM4626767 | Normal |
| GSM4626767_GTATTCTAGAAACGCC-1 | GSM4626767 | Normal |
| GSM4626767_GTATTCTCAAGGTTCT-1 | GSM4626767 | Normal |
| GSM4626767_GTATTCTGTGCGTTCT-1 | GSM4626767 | Normal |
| GSM4626767_GTATTCTGTGCCTGTG-1 | GSM4626767 | Normal |
| GSM4626767_GTATTCTTCACATGCA-1 | GSM4626767 | Normal |
| GSM4626767_GTATTCTTCCTCGCAT-1 | GSM4626767 | Normal |
| GSM4626767_GTCAAGTAGAAACCAT-1 | GSM4626767 | Normal |
| GSM4626767_GTCAAGTAGCCGATTT-1 | GSM4626767 | Normal |
| GSM4626767_GTCAAGTAGTCCGGTC-1 | GSM4626767 | Normal |
| GSM4626767_GTCAAGTAGTACTCT-1  | GSM4626767 | Normal |
| GSM4626767_GTCAAGTAGTTACCCA-1 | GSM4626767 | Normal |
| GSM4626767_GTCAAGTACCAGGTC-1  | GSM4626767 | Normal |
| GSM4626767_GTCAAGTCACTAGTAC-1 | GSM4626767 | Normal |
| GSM4626767_GTCAAGTGCTTCTCG-1  | GSM4626767 | Normal |
| GSM4626767_GTCAAGTGTTCCACGG-1 | GSM4626767 | Normal |
| GSM4626767_GTCAAGTTCGCAAAC-1  | GSM4626767 | Normal |
| GSM4626767_GTCACAAAGATGCGAC-1 | GSM4626767 | Normal |
| GSM4626767_GTCACAAAGGAGCGTT-1 | GSM4626767 | Normal |
| GSM4626767_GTCACAAAGTTTCCTT-1 | GSM4626767 | Normal |
| GSM4626767_GTCACAACACTGCCAG-1 | GSM4626767 | Normal |
| GSM4626767_GTCACAACAGCCTTGG-1 | GSM4626767 | Normal |
| GSM4626767_GTCACAACATCTCCCA-1 | GSM4626767 | Normal |
| GSM4626767_GTCACAATCGTCCGTT-1 | GSM4626767 | Normal |
| GSM4626767_GTCACGGCAACAACCT-1 | GSM4626767 | Normal |
| GSM4626767_GTCACGGTCGTACCGG-1 | GSM4626767 | Normal |
| GSM4626767_GTCATTTAGAAACCTA-1 | GSM4626767 | Normal |
| GSM4626767_GTCATTTAGGCCATAG-1 | GSM4626767 | Normal |
| GSM4626767_GTCATTTGTCTTTAT-1  | GSM4626767 | Normal |
| GSM4626767_GTCATTTGTGCGGTAA-1 | GSM4626767 | Normal |
| GSM4626767_GTCATTTTCACTTACT-1 | GSM4626767 | Normal |
| GSM4626767_GTCATTTTCTCCAACC-1 | GSM4626767 | Normal |
| GSM4626767_GTCATTTTCTGCGACG-1 | GSM4626767 | Normal |
| GSM4626767_GTCCTCAAGACCTAGG-1 | GSM4626767 | Normal |
| GSM4626767_GTCCTCAAGGTGCTAG-1 | GSM4626767 | Normal |
| GSM4626767_GTCCTCAGTCAGCTAT-1 | GSM4626767 | Normal |
| GSM4626767_GTCGGGTAGACGACGT-1 | GSM4626767 | Normal |
| GSM4626767_GTCGGGTAGCGTTCCG-1 | GSM4626767 | Normal |
| GSM4626767_GTCGGGTAGCTAACTC-1 | GSM4626767 | Normal |
| GSM4626767_GTCGGGTAGTCCGGTC-1 | GSM4626767 | Normal |
| GSM4626767_GTCGGGTAGTCGCCGT-1 | GSM4626767 | Normal |
| GSM4626767_GTCGGGTCATTCTTAC-1 | GSM4626767 | Normal |
| GSM4626767_GTCGGGTGTTGGGACA-1 | GSM4626767 | Normal |
| GSM4626767_GTCGGGTTGTTTATC-1  | GSM4626767 | Normal |
| GSM4626767_GTCGTAAAGAGTTGGC-1 | GSM4626767 | Normal |
| GSM4626767_GTCGTAAAGCTGAACG-1 | GSM4626767 | Normal |

|                                |            |        |
|--------------------------------|------------|--------|
| GSM4626767_GTCGTAAGTAGGGACT-1  | GSM4626767 | Normal |
| GSM4626767_GTCGTAAGTGCTGTAT-1  | GSM4626767 | Normal |
| GSM4626767_GTCGTAATCATCGATG-1  | GSM4626767 | Normal |
| GSM4626767_GTCGTAATCGTAGGAG-1  | GSM4626767 | Normal |
| GSM4626767_GTCGTAATCTGGCGTG-1  | GSM4626767 | Normal |
| GSM4626767_GTCTCGTAGCTTCGCG-1  | GSM4626767 | Normal |
| GSM4626767_GTCTCGTAGGCTCATT-1  | GSM4626767 | Normal |
| GSM4626767_GTCTCGTAGTAAGTAC-1  | GSM4626767 | Normal |
| GSM4626767_GTCTCGTCACATAACC-1  | GSM4626767 | Normal |
| GSM4626767_GTCTCGTCATGGATGG-1  | GSM4626767 | Normal |
| GSM4626767_GTCTCGTGTAATCGTC-1  | GSM4626767 | Normal |
| GSM4626767_GTCTCGTGTCAGAATA-1  | GSM4626767 | Normal |
| GSM4626767_GTCTCGTGTGTTCTTT-1  | GSM4626767 | Normal |
| GSM4626767_GTCTCGTGTGTTTGG-1   | GSM4626767 | Normal |
| GSM4626767_GTCTCGTTCCTAACCT-1  | GSM4626767 | Normal |
| GSM4626767_GTCTTCGAGAGTACCG-1  | GSM4626767 | Normal |
| GSM4626767_GTCTTCGAGCGCCTTG-1  | GSM4626767 | Normal |
| GSM4626767_GTCTTCGCACCCAGTG-1  | GSM4626767 | Normal |
| GSM4626767_GTCTTCGCACTGTCGG-1  | GSM4626767 | Normal |
| GSM4626767_GTCTTCGGTTTGACTG-1  | GSM4626767 | Normal |
| GSM4626767_GTCTTCGTCCTCAACC-1  | GSM4626767 | Normal |
| GSM4626767_GTCTTCGTCTCTTATG-1  | GSM4626767 | Normal |
| GSM4626767_GTGAAGGAGCGATAGC-1  | GSM4626767 | Normal |
| GSM4626767_GTGAAGGAGCTACCGC-1  | GSM4626767 | Normal |
| GSM4626767_GTGAAGGAGGAGTTGC-1  | GSM4626767 | Normal |
| GSM4626767_GTGAAGGCAAAGAATC-1  | GSM4626767 | Normal |
| GSM4626767_GTGAAGGCAATAACGA-1  | GSM4626767 | Normal |
| GSM4626767_GTGAAGGCACCAGTTA-1  | GSM4626767 | Normal |
| GSM4626767_GTGAAGGCATGAAGTA-1  | GSM4626767 | Normal |
| GSM4626767_GTGAAGGGTCCCTTGT-1  | GSM4626767 | Normal |
| GSM4626767_GTGAAGGGTCTCTTTA-1  | GSM4626767 | Normal |
| GSM4626767_GTGAAGGGTGGACGAT-1  | GSM4626767 | Normal |
| GSM4626767_GTGAAGGTCAAACAAG-1  | GSM4626767 | Normal |
| GSM4626767_GTGAAGGTCACCATAG-1  | GSM4626767 | Normal |
| GSM4626767_GTGAAGGTCTCTGCTG-1  | GSM4626767 | Normal |
| GSM4626767_GTGCAGCCAAGGACAC-1  | GSM4626767 | Normal |
| GSM4626767_GTGCAGCCATGCCACG-1  | GSM4626767 | Normal |
| GSM4626767_GTGCAGCGTCAAAGCG-1  | GSM4626767 | Normal |
| GSM4626767_GTGCAGCGTGACCAAG-1  | GSM4626767 | Normal |
| GSM4626767_GTGCAGCTCTGATACG-1  | GSM4626767 | Normal |
| GSM4626767_GTGCATAAGAATTGTG-1  | GSM4626767 | Normal |
| GSM4626767_GTGCATACACCATCCT-1  | GSM4626767 | Normal |
| GSM4626767_GTGCATAGTACTCGCG-1  | GSM4626767 | Normal |
| GSM4626767_GTGCATAGTTCGCTCT-1  | GSM4626767 | Normal |
| GSM4626767_GTGCATATCGTGAGT-1   | GSM4626767 | Normal |
| GSM4626767_GTGCGGTAGGAGTTGC-1  | GSM4626767 | Normal |
| GSM4626767_GTGCGGTGTTTGTTC-1   | GSM4626767 | Normal |
| GSM4626767_GTGCGGTTCAATCTCT-1  | GSM4626767 | Normal |
| GSM4626767_GTGCGGTTCAAGACG-1   | GSM4626767 | Normal |
| GSM4626767_GTGCGGTTCAAGGTG-1   | GSM4626767 | Normal |
| GSM4626767_GTGCGGTTCTATTCA-1   | GSM4626767 | Normal |
| GSM4626767_GTGCGGTTCCGCCCTTA-1 | GSM4626767 | Normal |
| GSM4626767_GTGCGGTTCCGAGCAA-1  | GSM4626767 | Normal |
| GSM4626767_GTGCTTCCAAAGCAAT-1  | GSM4626767 | Normal |
| GSM4626767_GTGCTTCCAAGGTTCA-1  | GSM4626767 | Normal |
| GSM4626767_GTGCTTCCACGGACAA-1  | GSM4626767 | Normal |
| GSM4626767_GTGCTTCGTAAGGGCT-1  | GSM4626767 | Normal |

|                                |            |        |
|--------------------------------|------------|--------|
| GSM4626767_GTGCTTCGTCATCCCT-1  | GSM4626767 | Normal |
| GSM4626767_GTGCTTCGCTTTTCAT-1  | GSM4626767 | Normal |
| GSM4626767_GTGCTTCGTTATCACG-1  | GSM4626767 | Normal |
| GSM4626767_GTGCTTCGTTGGTGA-1   | GSM4626767 | Normal |
| GSM4626767_GTGCTTCTCAAACCAC-1  | GSM4626767 | Normal |
| GSM4626767_GTGCTTCTCATGCTCC-1  | GSM4626767 | Normal |
| GSM4626767_GTGGGTCAGATATGCA-1  | GSM4626767 | Normal |
| GSM4626767_GTGGGTCAGGCTAGGT-1  | GSM4626767 | Normal |
| GSM4626767_GTGGGTCAGTGCCATT-1  | GSM4626767 | Normal |
| GSM4626767_GTGGGTCCATGGAATA-1  | GSM4626767 | Normal |
| GSM4626767_GTGGGTCGTAGAGTGC-1  | GSM4626767 | Normal |
| GSM4626767_GTGGGTCGTCCTAGCG-1  | GSM4626767 | Normal |
| GSM4626767_GTGGGTCTCCGGCACA-1  | GSM4626767 | Normal |
| GSM4626767_GTGGGTCTCTCTAAGG-1  | GSM4626767 | Normal |
| GSM4626767_GTGTGCGAGAGTGAGA-1  | GSM4626767 | Normal |
| GSM4626767_GTGTGCGAGCTGCGAA-1  | GSM4626767 | Normal |
| GSM4626767_GTGTGCGAGTCATCCA-1  | GSM4626767 | Normal |
| GSM4626767_GTGTGCGAGTTTAGGA-1  | GSM4626767 | Normal |
| GSM4626767_GTGTGCGCAAGCCTAT-1  | GSM4626767 | Normal |
| GSM4626767_GTGTGCGCAGGACGTA-1  | GSM4626767 | Normal |
| GSM4626767_GTGTGCGGTGGGTATG-1  | GSM4626767 | Normal |
| GSM4626767_GTGTGCGTCGGAAACG-1  | GSM4626767 | Normal |
| GSM4626767_GTGTGCGTCGTTGACA-1  | GSM4626767 | Normal |
| GSM4626767_GTGTGCGTCTCGTTTA-1  | GSM4626767 | Normal |
| GSM4626767_GTGTTAGAGCTGCAAG-1  | GSM4626767 | Normal |
| GSM4626767_GTGTTAGAGTACGTAA-1  | GSM4626767 | Normal |
| GSM4626767_GTGTTAGCACTCAGGC-1  | GSM4626767 | Normal |
| GSM4626767_GTGTTAGGTTAGTGGG-1  | GSM4626767 | Normal |
| GSM4626767_GTGTTAGGTTACAGCC-1  | GSM4626767 | Normal |
| GSM4626767_GTGTTAGTCATATCGG-1  | GSM4626767 | Normal |
| GSM4626767_GTGTTAGTCTCGTTTA-1  | GSM4626767 | Normal |
| GSM4626767_GTTAAGCAGAGTTGGC-1  | GSM4626767 | Normal |
| GSM4626767_GTTAAGCAGCCCAACC-1  | GSM4626767 | Normal |
| GSM4626767_GTTAAGCAGGGTTTCT-1  | GSM4626767 | Normal |
| GSM4626767_GTTAAGCAGTACCGGA-1  | GSM4626767 | Normal |
| GSM4626767_GTTAAGCCACTGTTAG-1  | GSM4626767 | Normal |
| GSM4626767_GTTAAGCGTAAGGGCT-1  | GSM4626767 | Normal |
| GSM4626767_GTTAAGCGTGGCTCCA-1  | GSM4626767 | Normal |
| GSM4626767_GTTAAGCGTGTGAATA-1  | GSM4626767 | Normal |
| GSM4626767_GTTAAGCTCACCATAG-1  | GSM4626767 | Normal |
| GSM4626767_GTTACAGAGACCTTTG-1  | GSM4626767 | Normal |
| GSM4626767_GTTACAGAGCCACGCT-1  | GSM4626767 | Normal |
| GSM4626767_GTTACAGCACGAAATA-1  | GSM4626767 | Normal |
| GSM4626767_GTTACAGCAGCTGTTA-1  | GSM4626767 | Normal |
| GSM4626767_GTTACAGCATTGCCC-1   | GSM4626767 | Normal |
| GSM4626767_GTTACAGGTACCGGCT-1  | GSM4626767 | Normal |
| GSM4626767_GTTACAGGTCTCCACT-1  | GSM4626767 | Normal |
| GSM4626767_GTTACAGGTGCCTTGG-1  | GSM4626767 | Normal |
| GSM4626767_GTTACAGTCAAACAAG-1  | GSM4626767 | Normal |
| GSM4626767_GTTACAGTCACGCATA-1  | GSM4626767 | Normal |
| GSM4626767_GTTACAGTCGATAGAA-1  | GSM4626767 | Normal |
| GSM4626767_GTTCATTAGAACTCGG-1  | GSM4626767 | Normal |
| GSM4626767_GTTCATTAGGCTAGCA-1  | GSM4626767 | Normal |
| GSM4626767_GTTCATTACATTGCA-1   | GSM4626767 | Normal |
| GSM4626767_GTTCATTACGGTTTA-1   | GSM4626767 | Normal |
| GSM4626767_GTTCATTACAGCATGAG-1 | GSM4626767 | Normal |
| GSM4626767_GTTCATTATCCGTGG-1   | GSM4626767 | Normal |

|                                |            |        |
|--------------------------------|------------|--------|
| GSM4626767_GTTCATTTTCGCAAGCC-1 | GSM4626767 | Normal |
| GSM4626767_GTTCGGGCAAGAAGAG-1  | GSM4626767 | Normal |
| GSM4626767_GTTCGGGCACCGTTGG-1  | GSM4626767 | Normal |
| GSM4626767_GTTCGGGCATCCCATC-1  | GSM4626767 | Normal |
| GSM4626767_GTTCGGGCATCGACGC-1  | GSM4626767 | Normal |
| GSM4626767_GTTCGGGGTAGCACGA-1  | GSM4626767 | Normal |
| GSM4626767_GTTCGGGGTGTGACGA-1  | GSM4626767 | Normal |
| GSM4626767_GTTCGGGTCGTCCGTT-1  | GSM4626767 | Normal |
| GSM4626767_GTTCGGGTCGTTTGCC-1  | GSM4626767 | Normal |
| GSM4626767_GTTCTCGAGTACGTAA-1  | GSM4626767 | Normal |
| GSM4626767_GTTCTCGCATCACCT-1   | GSM4626767 | Normal |
| GSM4626767_GTTCTCGGTGACTACT-1  | GSM4626767 | Normal |
| GSM4626767_GTTCTCGGTTATGTGC-1  | GSM4626767 | Normal |
| GSM4626767_GTTCTCGTCCGTCAA-1   | GSM4626767 | Normal |
| GSM4626767_GTTCTCGTCGAATGCT-1  | GSM4626767 | Normal |
| GSM4626767_GTTTCTAAGGCCATAG-1  | GSM4626767 | Normal |
| GSM4626767_GTTTCTAAGTTTAGGA-1  | GSM4626767 | Normal |
| GSM4626767_GTTTCTACAAGTTCT-1   | GSM4626767 | Normal |
| GSM4626767_GTTTCTACAATAACGA-1  | GSM4626767 | Normal |
| GSM4626767_GTTTCTACACTTCGAA-1  | GSM4626767 | Normal |
| GSM4626767_GTTTCTAGTCAGAATA-1  | GSM4626767 | Normal |
| GSM4626767_GTTTCTAGTTACAGAA-1  | GSM4626767 | Normal |
| GSM4626767_GTTTCTAGTTGCGTTA-1  | GSM4626767 | Normal |
| GSM4626767_GTTTCTATCAGCAACT-1  | GSM4626767 | Normal |
| GSM4626767_GTTTCTATCAGTTTGG-1  | GSM4626767 | Normal |
| GSM4626767_TAAACCGCACGAGGTA-1  | GSM4626767 | Normal |
| GSM4626767_TAAACCGGTCCGACGT-1  | GSM4626767 | Normal |
| GSM4626767_TAAACCGGTCGCTTTC-1  | GSM4626767 | Normal |
| GSM4626767_TAAACCGTCGTGGGAA-1  | GSM4626767 | Normal |
| GSM4626767_TAAACCGTCTCCAGGG-1  | GSM4626767 | Normal |
| GSM4626767_TAAACCGTCTCCCTGA-1  | GSM4626767 | Normal |
| GSM4626767_TAAACCGTCTCGATGA-1  | GSM4626767 | Normal |
| GSM4626767_TAAGAGAAGGCCATAG-1  | GSM4626767 | Normal |
| GSM4626767_TAAGAGACAGCCTGTG-1  | GSM4626767 | Normal |
| GSM4626767_TAAGAGACAGGATCGA-1  | GSM4626767 | Normal |
| GSM4626767_TAAGAGACATAAAGGT-1  | GSM4626767 | Normal |
| GSM4626767_TAAGAGACATCCTAGA-1  | GSM4626767 | Normal |
| GSM4626767_TAAGAGAGTATCTGCA-1  | GSM4626767 | Normal |
| GSM4626767_TAAGAGAGTGAAAGA-1   | GSM4626767 | Normal |
| GSM4626767_TAAGAGAGTTTAGGAA-1  | GSM4626767 | Normal |
| GSM4626767_TAAGCGTAGACAATAC-1  | GSM4626767 | Normal |
| GSM4626767_TAAGCGTAGCCCAGCT-1  | GSM4626767 | Normal |
| GSM4626767_TAAGCGTCACCTCGGA-1  | GSM4626767 | Normal |
| GSM4626767_TAAGCGTCAGACAAGC-1  | GSM4626767 | Normal |
| GSM4626767_TAAGCGTGTCACTGGC-1  | GSM4626767 | Normal |
| GSM4626767_TAAGCGTGTCTAGCG-1   | GSM4626767 | Normal |
| GSM4626767_TAAGCGTGTGATAAAC-1  | GSM4626767 | Normal |
| GSM4626767_TAAGCGTTCATGCTCC-1  | GSM4626767 | Normal |
| GSM4626767_TAAGCGTTCATTCTA-1   | GSM4626767 | Normal |
| GSM4626767_TAAGCGTTCCTGAGGT-1  | GSM4626767 | Normal |
| GSM4626767_TAAGTGCAGCCACCTG-1  | GSM4626767 | Normal |
| GSM4626767_TAAGTGCCAAAGAATC-1  | GSM4626767 | Normal |
| GSM4626767_TAAGTGC GTTATGCGT-1 | GSM4626767 | Normal |
| GSM4626767_TAAGTGCTCGACGGAA-1  | GSM4626767 | Normal |
| GSM4626767_TACACGAAGGTGATTA-1  | GSM4626767 | Normal |
| GSM4626767_TACACGACAGTTAACC-1  | GSM4626767 | Normal |
| GSM4626767_TACACGAGTACCGTAT-1  | GSM4626767 | Normal |

|                               |            |        |
|-------------------------------|------------|--------|
| GSM4626767_TACACGAGTGGTGTAG-1 | GSM4626767 | Normal |
| GSM4626767_TACACGATCAGCAACT-1 | GSM4626767 | Normal |
| GSM4626767_TACACGATCCATGAGT-1 | GSM4626767 | Normal |
| GSM4626767_TACACGATCTGCTTGC-1 | GSM4626767 | Normal |
| GSM4626767_TACAGTGAGCGCCTCA-1 | GSM4626767 | Normal |
| GSM4626767_TACAGTGCAAAGAATC-1 | GSM4626767 | Normal |
| GSM4626767_TACAGTGGTACCGTAT-1 | GSM4626767 | Normal |
| GSM4626767_TACAGTGTCGCAAAC-1  | GSM4626767 | Normal |
| GSM4626767_TACAGTGTCTCTAGGA-1 | GSM4626767 | Normal |
| GSM4626767_TACCTATAGCTCCTCT-1 | GSM4626767 | Normal |
| GSM4626767_TACCTATAGTGAATTG-1 | GSM4626767 | Normal |
| GSM4626767_TACCTATCACAAGCCC-1 | GSM4626767 | Normal |
| GSM4626767_TACCTATCAGACAAAT-1 | GSM4626767 | Normal |
| GSM4626767_TACCTATTCAACCATG-1 | GSM4626767 | Normal |
| GSM4626767_TACCTATTCGCGTTTC-1 | GSM4626767 | Normal |
| GSM4626767_TACCTATTCTAACTCT-1 | GSM4626767 | Normal |
| GSM4626767_TACCTATTCTCAAACG-1 | GSM4626767 | Normal |
| GSM4626767_TACCTTAAGAGGTACC-1 | GSM4626767 | Normal |
| GSM4626767_TACCTTAAGCACGCCT-1 | GSM4626767 | Normal |
| GSM4626767_TACCTTAAGCCCAACC-1 | GSM4626767 | Normal |
| GSM4626767_TACCTTAAGGACACCA-1 | GSM4626767 | Normal |
| GSM4626767_TACCTTACAATAGAGT-1 | GSM4626767 | Normal |
| GSM4626767_TACCTTACACTTGGAT-1 | GSM4626767 | Normal |
| GSM4626767_TACCTTACATATACCG-1 | GSM4626767 | Normal |
| GSM4626767_TACCTTACATTACCTT-1 | GSM4626767 | Normal |
| GSM4626767_TACCTTACATTGAGCT-1 | GSM4626767 | Normal |
| GSM4626767_TACCTTAGTCAGAAGC-1 | GSM4626767 | Normal |
| GSM4626767_TACCTTAGTCCGAACC-1 | GSM4626767 | Normal |
| GSM4626767_TACCTTATCCTTGCCA-1 | GSM4626767 | Normal |
| GSM4626767_TACGGATAGACATAAC-1 | GSM4626767 | Normal |
| GSM4626767_TACGGATAGACGCTTT-1 | GSM4626767 | Normal |
| GSM4626767_TACGGATCAAACAACA-1 | GSM4626767 | Normal |
| GSM4626767_TACGGATCAAAGCGGT-1 | GSM4626767 | Normal |
| GSM4626767_TACGGATCACTTGGAT-1 | GSM4626767 | Normal |
| GSM4626767_TACGGATGTACCATCA-1 | GSM4626767 | Normal |
| GSM4626767_TACGGATGTCTTGCC-1  | GSM4626767 | Normal |
| GSM4626767_TACGGATGTGAAATCA-1 | GSM4626767 | Normal |
| GSM4626767_TACGGGCAGCGTTGCC-1 | GSM4626767 | Normal |
| GSM4626767_TACGGGCAGGAGCGTT-1 | GSM4626767 | Normal |
| GSM4626767_TACGGGCAGGAGTTGC-1 | GSM4626767 | Normal |
| GSM4626767_TACGGGCAGGCATGGT-1 | GSM4626767 | Normal |
| GSM4626767_TACGGGCAGTATGACA-1 | GSM4626767 | Normal |
| GSM4626767_TACGGGCCATTCACTT-1 | GSM4626767 | Normal |
| GSM4626767_TACGGGCGTCTAAACC-1 | GSM4626767 | Normal |
| GSM4626767_TACGGGCGTGGTCCGT-1 | GSM4626767 | Normal |
| GSM4626767_TACGGGCTCATGTCCC-1 | GSM4626767 | Normal |
| GSM4626767_TACGGTAAGACGCACA-1 | GSM4626767 | Normal |
| GSM4626767_TACGGTAAGGACTGGT-1 | GSM4626767 | Normal |
| GSM4626767_TACGGTAAGGTGACCA-1 | GSM4626767 | Normal |
| GSM4626767_TACGGTAAGTGTACCT-1 | GSM4626767 | Normal |
| GSM4626767_TACGGTAGTAGTGAAT-1 | GSM4626767 | Normal |
| GSM4626767_TACGGTAGTCGCCATG-1 | GSM4626767 | Normal |
| GSM4626767_TACGGTAGTCTGCAAT-1 | GSM4626767 | Normal |
| GSM4626767_TACGGTATCACCTTAT-1 | GSM4626767 | Normal |
| GSM4626767_TACGGTATCTCTTGAT-1 | GSM4626767 | Normal |
| GSM4626767_TACTCATAGAGCCCAA-1 | GSM4626767 | Normal |
| GSM4626767_TACTCATCAGGACGTA-1 | GSM4626767 | Normal |

|                                 |            |        |
|---------------------------------|------------|--------|
| GSM4626767_TACTCATCAGGCTCAC-1   | GSM4626767 | Normal |
| GSM4626767_TACTCATCAGTTCATG-1   | GSM4626767 | Normal |
| GSM4626767_TACTCATCATAAGACA-1   | GSM4626767 | Normal |
| GSM4626767_TACTCATGTACCCAAT-1   | GSM4626767 | Normal |
| GSM4626767_TACTCATGTGCTAGCC-1   | GSM4626767 | Normal |
| GSM4626767_TACTCATGTGTTTCGAT-1  | GSM4626767 | Normal |
| GSM4626767_TACTCATGTTTGGGCC-1   | GSM4626767 | Normal |
| GSM4626767_TACTCATGTTTGTGTG-1   | GSM4626767 | Normal |
| GSM4626767_TACTCGCAGAACAAC-1    | GSM4626767 | Normal |
| GSM4626767_TACTCGCAGATCGGGT-1   | GSM4626767 | Normal |
| GSM4626767_TACTCGCAGTGCAAGC-1   | GSM4626767 | Normal |
| GSM4626767_TACTCGCCACCTGGTG-1   | GSM4626767 | Normal |
| GSM4626767_TACTCGCCAGATGGCA-1   | GSM4626767 | Normal |
| GSM4626767_TACTCGCGTTGTTTGG-1   | GSM4626767 | Normal |
| GSM4626767_TACTCGCTCTTCGAGA-1   | GSM4626767 | Normal |
| GSM4626767_TACTTACTCCTATGTT-1   | GSM4626767 | Normal |
| GSM4626767_TACTTACTCGATAGAA-1   | GSM4626767 | Normal |
| GSM4626767_TACTTACTCGCGGATC-1   | GSM4626767 | Normal |
| GSM4626767_TACTTACTCTACTTAC-1   | GSM4626767 | Normal |
| GSM4626767_TACTTGTAGAACTCGG-1   | GSM4626767 | Normal |
| GSM4626767_TACTTGTAGTACACCT-1   | GSM4626767 | Normal |
| GSM4626767_TACTTGTGCTAGCTGTAT-1 | GSM4626767 | Normal |
| GSM4626767_TACTTGTGTATGAAAC-1   | GSM4626767 | Normal |
| GSM4626767_TACTTGTGTCTAGCGC-1   | GSM4626767 | Normal |
| GSM4626767_TACTTGTGTTATGTGC-1   | GSM4626767 | Normal |
| GSM4626767_TAGACCAAGACAAAGG-1   | GSM4626767 | Normal |
| GSM4626767_TAGACCAAGCACGCCT-1   | GSM4626767 | Normal |
| GSM4626767_TAGACCAAGGCACATG-1   | GSM4626767 | Normal |
| GSM4626767_TAGACCAAGTACGATA-1   | GSM4626767 | Normal |
| GSM4626767_TAGACCAGTCCGACGT-1   | GSM4626767 | Normal |
| GSM4626767_TAGACCAGTGCGATAG-1   | GSM4626767 | Normal |
| GSM4626767_TAGACCAGTTCGCGAC-1   | GSM4626767 | Normal |
| GSM4626767_TAGACCATCCTAGAAC-1   | GSM4626767 | Normal |
| GSM4626767_TAGACCATCGAGCCCA-1   | GSM4626767 | Normal |
| GSM4626767_TAGAGCTAGAACTCGG-1   | GSM4626767 | Normal |
| GSM4626767_TAGAGCTAGACTAGAT-1   | GSM4626767 | Normal |
| GSM4626767_TAGAGCTAGAGAACAG-1   | GSM4626767 | Normal |
| GSM4626767_TAGAGCTAGGAGTCTG-1   | GSM4626767 | Normal |
| GSM4626767_TAGAGCTAGGCATGTG-1   | GSM4626767 | Normal |
| GSM4626767_TAGAGCTAGGTGCACA-1   | GSM4626767 | Normal |
| GSM4626767_TAGAGCTAGGTGCTAG-1   | GSM4626767 | Normal |
| GSM4626767_TAGAGCTGTGCCATG-1    | GSM4626767 | Normal |
| GSM4626767_TAGAGCTGTGACCAAG-1   | GSM4626767 | Normal |
| GSM4626767_TAGAGCTGTTAGAACA-1   | GSM4626767 | Normal |
| GSM4626767_TAGAGCTTCCTTAATC-1   | GSM4626767 | Normal |
| GSM4626767_TAGCCGGAGCTAGTTC-1   | GSM4626767 | Normal |
| GSM4626767_TAGCCGGCAATGTAAG-1   | GSM4626767 | Normal |
| GSM4626767_TAGCCGGCATCACGAT-1   | GSM4626767 | Normal |
| GSM4626767_TAGCCGGGTTACGGAG-1   | GSM4626767 | Normal |
| GSM4626767_TAGCCGGGTTTAGGAA-1   | GSM4626767 | Normal |
| GSM4626767_TAGCCGGTCTCGCTTG-1   | GSM4626767 | Normal |
| GSM4626767_TAGCCGGTCTGGCGAC-1   | GSM4626767 | Normal |
| GSM4626767_TAGGCATAGCCAACAG-1   | GSM4626767 | Normal |
| GSM4626767_TAGGCATAGGCGCTCT-1   | GSM4626767 | Normal |
| GSM4626767_TAGGCATCACATAACC-1   | GSM4626767 | Normal |
| GSM4626767_TAGGCATCATACAGCT-1   | GSM4626767 | Normal |

|                                |            |        |
|--------------------------------|------------|--------|
| GSM4626767_TAGGCATGTAGCGTGA-1  | GSM4626767 | Normal |
| GSM4626767_TAGGCATGTCTCTCGT-1  | GSM4626767 | Normal |
| GSM4626767_TAGGCATGTGCAACTT-1  | GSM4626767 | Normal |
| GSM4626767_TAGGCATGTGTAATGA-1  | GSM4626767 | Normal |
| GSM4626767_TAGGCATTGAGAGGTG-1  | GSM4626767 | Normal |
| GSM4626767_TAGGCATTGAGCCCA-1   | GSM4626767 | Normal |
| GSM4626767_TAGGCATTCTTTCCTC-1  | GSM4626767 | Normal |
| GSM4626767_TAGTGGTAGGCCCGTT-1  | GSM4626767 | Normal |
| GSM4626767_TAGTGGTAGGTCATCT-1  | GSM4626767 | Normal |
| GSM4626767_TAGTGGTAGTTTGCCT-1  | GSM4626767 | Normal |
| GSM4626767_TAGTGGTACAAAGACG-1  | GSM4626767 | Normal |
| GSM4626767_TAGTGGTACGAAATA-1   | GSM4626767 | Normal |
| GSM4626767_TAGTGGTACCCATC-1    | GSM4626767 | Normal |
| GSM4626767_TAGTGGTCATTAACCG-1  | GSM4626767 | Normal |
| GSM4626767_TAGTGGTCCCATTA-1    | GSM4626767 | Normal |
| GSM4626767_TAGTGGTCCCTAATT-1   | GSM4626767 | Normal |
| GSM4626767_TAGTTGGAGAAACCAT-1  | GSM4626767 | Normal |
| GSM4626767_TAGTTGGAGCAGCGTA-1  | GSM4626767 | Normal |
| GSM4626767_TAGTTGGAGCGTTGCC-1  | GSM4626767 | Normal |
| GSM4626767_TAGTTGGAGGCTAGGT-1  | GSM4626767 | Normal |
| GSM4626767_TAGTTGGCAAGGACAC-1  | GSM4626767 | Normal |
| GSM4626767_TAGTTGGCACAACGTT-1  | GSM4626767 | Normal |
| GSM4626767_TAGTTGGTCGGATGGA-1  | GSM4626767 | Normal |
| GSM4626767_TAGTTGGTCTCTAGGA-1  | GSM4626767 | Normal |
| GSM4626767_TAGTTGGTCTTCCCTC-1  | GSM4626767 | Normal |
| GSM4626767_TATCAGGAGAATGTGT-1  | GSM4626767 | Normal |
| GSM4626767_TATCAGGAGTGCTGCC-1  | GSM4626767 | Normal |
| GSM4626767_TATCAGGCAATTGCTG-1  | GSM4626767 | Normal |
| GSM4626767_TATCAGGCACCGAAAG-1  | GSM4626767 | Normal |
| GSM4626767_TATCAGGCACTGTTAG-1  | GSM4626767 | Normal |
| GSM4626767_TATCAGGCAGCAGTTT-1  | GSM4626767 | Normal |
| GSM4626767_TATCAGGCATGCCCGA-1  | GSM4626767 | Normal |
| GSM4626767_TATCAGGGTAAGGATT-1  | GSM4626767 | Normal |
| GSM4626767_TATCAGGGTTTAGCTG-1  | GSM4626767 | Normal |
| GSM4626767_TATCTCAAGACATAAC-1  | GSM4626767 | Normal |
| GSM4626767_TATCTCACAAGTCATC-1  | GSM4626767 | Normal |
| GSM4626767_TATCTCACAATCCAAC-1  | GSM4626767 | Normal |
| GSM4626767_TATCTCACACGAAATA-1  | GSM4626767 | Normal |
| GSM4626767_TATCTCACAGAAGCAC-1  | GSM4626767 | Normal |
| GSM4626767_TATCTCACATGAAGTA-1  | GSM4626767 | Normal |
| GSM4626767_TATCTCAGTATCAGTC-1  | GSM4626767 | Normal |
| GSM4626767_TATCTCAGTCCGACGT-1  | GSM4626767 | Normal |
| GSM4626767_TATCTCAGTGTTTCGAT-1 | GSM4626767 | Normal |
| GSM4626767_TATCTCATCATTGCC-1   | GSM4626767 | Normal |
| GSM4626767_TATCTCATCCAATGGT-1  | GSM4626767 | Normal |
| GSM4626767_TATCTCATCTAGCACA-1  | GSM4626767 | Normal |
| GSM4626767_TATGCCAGACCACGA-1   | GSM4626767 | Normal |
| GSM4626767_TATGCCCAAATTGCC-1   | GSM4626767 | Normal |
| GSM4626767_TATGCCACAGCGTC-1    | GSM4626767 | Normal |
| GSM4626767_TATGCCACCAACCG-1    | GSM4626767 | Normal |
| GSM4626767_TATGCCAGCTTCGG-1    | GSM4626767 | Normal |
| GSM4626767_TATGCCCGTATATGGA-1  | GSM4626767 | Normal |
| GSM4626767_TATGCCCGTCGATTGT-1  | GSM4626767 | Normal |
| GSM4626767_TATGCCCGTCTCCACT-1  | GSM4626767 | Normal |
| GSM4626767_TATGCCCGTGGTAACG-1  | GSM4626767 | Normal |
| GSM4626767_TATGCCCGTTCTGGTA-1  | GSM4626767 | Normal |
| GSM4626767_TATGCCCTCCTTCAAT-1  | GSM4626767 | Normal |



|                                |            |        |
|--------------------------------|------------|--------|
| GSM4626767_TATGCCCTCGAGCCCA-1  | GSM4626767 | Normal |
| GSM4626767_TATTACCAGTCGTTTG-1  | GSM4626767 | Normal |
| GSM4626767_TATTACCAGCTCGAC-1   | GSM4626767 | Normal |
| GSM4626767_TATTACCGTCTCTTTA-1  | GSM4626767 | Normal |
| GSM4626767_TATTACCTCAACGCTA-1  | GSM4626767 | Normal |
| GSM4626767_TATTACCTCCATGCTC-1  | GSM4626767 | Normal |
| GSM4626767_TATTACCTCGATCCCT-1  | GSM4626767 | Normal |
| GSM4626767_TATTACCTCGGTGTTCG-1 | GSM4626767 | Normal |
| GSM4626767_TATTACCTCTCAAGTG-1  | GSM4626767 | Normal |
| GSM4626767_TCAACGAAGGGAGTAA-1  | GSM4626767 | Normal |
| GSM4626767_TCAACGACAATGGAGC-1  | GSM4626767 | Normal |
| GSM4626767_TCAACGACACCAGATT-1  | GSM4626767 | Normal |
| GSM4626767_TCAACGACAGAGCCAA-1  | GSM4626767 | Normal |
| GSM4626767_TCAACGACATGTAGTC-1  | GSM4626767 | Normal |
| GSM4626767_TCAACGAGTACAGCAG-1  | GSM4626767 | Normal |
| GSM4626767_TCAACGAGTCTCGTTC-1  | GSM4626767 | Normal |
| GSM4626767_TCAACGATCTAACCGA-1  | GSM4626767 | Normal |
| GSM4626767_TCAACGATCTTAGAGC-1  | GSM4626767 | Normal |
| GSM4626767_TCAATCTAGAACTCGG-1  | GSM4626767 | Normal |
| GSM4626767_TCAATCTAGATGTCCG-1  | GSM4626767 | Normal |
| GSM4626767_TCAATCTAGATGTGTA-1  | GSM4626767 | Normal |
| GSM4626767_TCAATCTCAAAGTCAA-1  | GSM4626767 | Normal |
| GSM4626767_TCAATCTCAGGCTGAA-1  | GSM4626767 | Normal |
| GSM4626767_TCAATCTGTAGAGTGC-1  | GSM4626767 | Normal |
| GSM4626767_TCAATCTGTAGCGTCC-1  | GSM4626767 | Normal |
| GSM4626767_TCAATCTGTAGGACAC-1  | GSM4626767 | Normal |
| GSM4626767_TCAATCTGTCATGCAT-1  | GSM4626767 | Normal |
| GSM4626767_TCACAAGAGAAGCCCA-1  | GSM4626767 | Normal |
| GSM4626767_TCACAAGAGAGTAATC-1  | GSM4626767 | Normal |
| GSM4626767_TCACAAGAGATCGGGT-1  | GSM4626767 | Normal |
| GSM4626767_TCACAAGAGGTGCAAC-1  | GSM4626767 | Normal |
| GSM4626767_TCACAAGGTACGCGA-1   | GSM4626767 | Normal |
| GSM4626767_TCACAAGGTCTCTTG-1   | GSM4626767 | Normal |
| GSM4626767_TCACAAGTCCTAGTGA-1  | GSM4626767 | Normal |
| GSM4626767_TCACAAGTCGCAGGCT-1  | GSM4626767 | Normal |
| GSM4626767_TCACGAAAGAGGACGG-1  | GSM4626767 | Normal |
| GSM4626767_TCACGAAAGCTAAACA-1  | GSM4626767 | Normal |
| GSM4626767_TCACGAAAGCTGATAA-1  | GSM4626767 | Normal |
| GSM4626767_TCACGAAAGGCGCTCT-1  | GSM4626767 | Normal |
| GSM4626767_TCACGAAAGTCCGGTC-1  | GSM4626767 | Normal |
| GSM4626767_TCACGAACAGTCTTCC-1  | GSM4626767 | Normal |
| GSM4626767_TCACGAAGTACCGTAT-1  | GSM4626767 | Normal |
| GSM4626767_TCACGAATCCGCTGTT-1  | GSM4626767 | Normal |
| GSM4626767_TCACGAATCGGAATCT-1  | GSM4626767 | Normal |
| GSM4626767_TCACGAATCTTGAGGT-1  | GSM4626767 | Normal |
| GSM4626767_TCAGATGAGAAAGTGG-1  | GSM4626767 | Normal |
| GSM4626767_TCAGATGAGATCACGG-1  | GSM4626767 | Normal |
| GSM4626767_TCAGATGAGGGAACGG-1  | GSM4626767 | Normal |
| GSM4626767_TCAGATGAGTGTACCT-1  | GSM4626767 | Normal |
| GSM4626767_TCAGATGCAAGTAGTA-1  | GSM4626767 | Normal |
| GSM4626767_TCAGATGCACCACGTG-1  | GSM4626767 | Normal |
| GSM4626767_TCAGATGCACTGTCCG-1  | GSM4626767 | Normal |
| GSM4626767_TCAGATGCAGCTCGAC-1  | GSM4626767 | Normal |
| GSM4626767_TCAGATGCAGTGAGTG-1  | GSM4626767 | Normal |
| GSM4626767_TCAGATGCAGTTAACC-1  | GSM4626767 | Normal |
| GSM4626767_TCAGATGGTCCATCCCT-1 | GSM4626767 | Normal |
| GSM4626767_TCAGATGGTGGGTATG-1  | GSM4626767 | Normal |

|                                |            |        |
|--------------------------------|------------|--------|
| GSM4626767_TCAGATGTCGTTTATC-1  | GSM4626767 | Normal |
| GSM4626767_TCAGCAAAGAAACCGC-1  | GSM4626767 | Normal |
| GSM4626767_TCAGCAAAGAAGATTC-1  | GSM4626767 | Normal |
| GSM4626767_TCAGCAACAAGTCATC-1  | GSM4626767 | Normal |
| GSM4626767_TCAGCAACACAGGCCT-1  | GSM4626767 | Normal |
| GSM4626767_TCAGCAACAGATGAGC-1  | GSM4626767 | Normal |
| GSM4626767_TCAGCAATCACGGTTA-1  | GSM4626767 | Normal |
| GSM4626767_TCAGCAATCGGCTACG-1  | GSM4626767 | Normal |
| GSM4626767_TCAGCAATCTGATACG-1  | GSM4626767 | Normal |
| GSM4626767_TCAGCTCAGCTTATCG-1  | GSM4626767 | Normal |
| GSM4626767_TCAGCTCGTAAAGGAG-1  | GSM4626767 | Normal |
| GSM4626767_TCAGCTCGTATCACCA-1  | GSM4626767 | Normal |
| GSM4626767_TCAGCTCGTGTCAATC-1  | GSM4626767 | Normal |
| GSM4626767_TCAGCTCTCAGTCAGT-1  | GSM4626767 | Normal |
| GSM4626767_TCAGCTCTCATGTCCC-1  | GSM4626767 | Normal |
| GSM4626767_TCAGCTCTCGCATGAT-1  | GSM4626767 | Normal |
| GSM4626767_TCAGGATAGGTAAACT-1  | GSM4626767 | Normal |
| GSM4626767_TCAGGATCAAACCCAT-1  | GSM4626767 | Normal |
| GSM4626767_TCAGGATCACTGTGTA-1  | GSM4626767 | Normal |
| GSM4626767_TCAGGATCAGACGCAA-1  | GSM4626767 | Normal |
| GSM4626767_TCAGGATGTTACCAGT-1  | GSM4626767 | Normal |
| GSM4626767_TCAGGATGTTATCACG-1  | GSM4626767 | Normal |
| GSM4626767_TCAGGATCCGCGCAA-1   | GSM4626767 | Normal |
| GSM4626767_TCAGGTACAGTGGGAT-1  | GSM4626767 | Normal |
| GSM4626767_TCAGGTAGTGTGTGCC-1  | GSM4626767 | Normal |
| GSM4626767_TCAGGTAGTGTAAAGA-1  | GSM4626767 | Normal |
| GSM4626767_TCAGGTATCGGGAGTA-1  | GSM4626767 | Normal |
| GSM4626767_TCATTACAGACAATAC-1  | GSM4626767 | Normal |
| GSM4626767_TCATTACCAACTGCTA-1  | GSM4626767 | Normal |
| GSM4626767_TCATTACCAGGAATCG-1  | GSM4626767 | Normal |
| GSM4626767_TCATTACGTGTGCCTG-1  | GSM4626767 | Normal |
| GSM4626767_TCATTACTCAGTGTTG-1  | GSM4626767 | Normal |
| GSM4626767_TCATTTGAGAGCTGCA-1  | GSM4626767 | Normal |
| GSM4626767_TCATTTGAGGAGTCTG-1  | GSM4626767 | Normal |
| GSM4626767_TCATTTGAGTGAATTG-1  | GSM4626767 | Normal |
| GSM4626767_TCATTTGCACTAAGTC-1  | GSM4626767 | Normal |
| GSM4626767_TCATTTGCAGGTGCCT-1  | GSM4626767 | Normal |
| GSM4626767_TCATTTGGTAACCGGA-1  | GSM4626767 | Normal |
| GSM4626767_TCATTTGTCATGTGGT-1  | GSM4626767 | Normal |
| GSM4626767_TCATTTGTCTATCCCG-1  | GSM4626767 | Normal |
| GSM4626767_TCCACACAGCAACGGT-1  | GSM4626767 | Normal |
| GSM4626767_TCCACACAGCGTAGTG-1  | GSM4626767 | Normal |
| GSM4626767_TCCACACAGGAATTAC-1  | GSM4626767 | Normal |
| GSM4626767_TCCACACCATCCCATC-1  | GSM4626767 | Normal |
| GSM4626767_TCCACACGTACTCGCG-1  | GSM4626767 | Normal |
| GSM4626767_TCCACACTCAGTAAA-1   | GSM4626767 | Normal |
| GSM4626767_TCCCGATAGAACAATC-1  | GSM4626767 | Normal |
| GSM4626767_TCCCGATCATCGGACC-1  | GSM4626767 | Normal |
| GSM4626767_TCCCGATGTGCTGTAT-1  | GSM4626767 | Normal |
| GSM4626767_TCCCGATTTCGTCACGG-1 | GSM4626767 | Normal |
| GSM4626767_TCGAGGCCAAGCGTAG-1  | GSM4626767 | Normal |
| GSM4626767_TCGAGGCCAGGGCATA-1  | GSM4626767 | Normal |
| GSM4626767_TCGAGGCGTTCGGGCT-1  | GSM4626767 | Normal |
| GSM4626767_TCGCGAGCAAGGACTG-1  | GSM4626767 | Normal |
| GSM4626767_TCGCGAGCACATCCGG-1  | GSM4626767 | Normal |
| GSM4626767_TCGCGAGCACGGTGTC-1  | GSM4626767 | Normal |
| GSM4626767_TCGCGAGCATTCCCTCG-1 | GSM4626767 | Normal |

|                                |            |        |
|--------------------------------|------------|--------|
| GSM4626767_TCGCGAGGTATCACCA-1  | GSM4626767 | Normal |
| GSM4626767_TCGCGAGGTCAGAGGT-1  | GSM4626767 | Normal |
| GSM4626767_TCGCGAGGTCCGAGTC-1  | GSM4626767 | Normal |
| GSM4626767_TCGCGAGTCAGATAAG-1  | GSM4626767 | Normal |
| GSM4626767_TCGCGAGTCAGTCAGT-1  | GSM4626767 | Normal |
| GSM4626767_TCGCGAGTCCCATTTA-1  | GSM4626767 | Normal |
| GSM4626767_TCGCGAGTCGTGGGAA-1  | GSM4626767 | Normal |
| GSM4626767_TCGCGAGTCTGCAAGT-1  | GSM4626767 | Normal |
| GSM4626767_TCGCGTTAGGGATCTG-1  | GSM4626767 | Normal |
| GSM4626767_TCGCGTTAGTGAACAT-1  | GSM4626767 | Normal |
| GSM4626767_TCGCGTTAGTTATCGC-1  | GSM4626767 | Normal |
| GSM4626767_TCGCGTTCAATACGCT-1  | GSM4626767 | Normal |
| GSM4626767_TCGCGTTCAGTTCATG-1  | GSM4626767 | Normal |
| GSM4626767_TCGCGTTTTACAACGT-1  | GSM4626767 | Normal |
| GSM4626767_TCGCGTTTTCAGCATGT-1 | GSM4626767 | Normal |
| GSM4626767_TCGCGTTTTCTTTATG-1  | GSM4626767 | Normal |
| GSM4626767_TCGGGACCAAATACAG-1  | GSM4626767 | Normal |
| GSM4626767_TCGGGACCAACCGCCA-1  | GSM4626767 | Normal |
| GSM4626767_TCGGGACGTACGCTGC-1  | GSM4626767 | Normal |
| GSM4626767_TCGGGACGTATAAACG-1  | GSM4626767 | Normal |
| GSM4626767_TCGGGACGTATCACCA-1  | GSM4626767 | Normal |
| GSM4626767_TCGGGACGTGTGACCC-1  | GSM4626767 | Normal |
| GSM4626767_TCGGGACTCGCCGTGA-1  | GSM4626767 | Normal |
| GSM4626767_TCGGTAAAGGACGAAA-1  | GSM4626767 | Normal |
| GSM4626767_TCGGTAAAGGTAAACT-1  | GSM4626767 | Normal |
| GSM4626767_TCGGTAACATACGCTA-1  | GSM4626767 | Normal |
| GSM4626767_TCGGTAAGTATAGTAG-1  | GSM4626767 | Normal |
| GSM4626767_TCGGTAAGTTACTGAC-1  | GSM4626767 | Normal |
| GSM4626767_TCGGTAAGTTGCGCAC-1  | GSM4626767 | Normal |
| GSM4626767_TCGTACCAGATGGGTC-1  | GSM4626767 | Normal |
| GSM4626767_TCGTACCAGGCCGAAT-1  | GSM4626767 | Normal |
| GSM4626767_TCGTACCAGTCTTGCA-1  | GSM4626767 | Normal |
| GSM4626767_TCGTACCAGTTAACGA-1  | GSM4626767 | Normal |
| GSM4626767_TCGTACCCAAACTGCT-1  | GSM4626767 | Normal |
| GSM4626767_TCGTACCCAAAGGAAG-1  | GSM4626767 | Normal |
| GSM4626767_TCGTACCCAAGCCATT-1  | GSM4626767 | Normal |
| GSM4626767_TCGTACCGTTCACGGC-1  | GSM4626767 | Normal |
| GSM4626767_TCGTAGACATGAGCGA-1  | GSM4626767 | Normal |
| GSM4626767_TCGTAGATCAGCAACT-1  | GSM4626767 | Normal |
| GSM4626767_TCGTAGATCCGCATCT-1  | GSM4626767 | Normal |
| GSM4626767_TCGTAGATCCGTCAA-1   | GSM4626767 | Normal |
| GSM4626767_TCTATTGAGAGACTAT-1  | GSM4626767 | Normal |
| GSM4626767_TCTATTGCAATGACCT-1  | GSM4626767 | Normal |
| GSM4626767_TCTATTGCAGCTGTAT-1  | GSM4626767 | Normal |
| GSM4626767_TCTATTGGTGAAGGCT-1  | GSM4626767 | Normal |
| GSM4626767_TCTATTGGTTCGGCAC-1  | GSM4626767 | Normal |
| GSM4626767_TCTCATAAGTGCAAGC-1  | GSM4626767 | Normal |
| GSM4626767_TCTCATAAATAAGCA-1   | GSM4626767 | Normal |
| GSM4626767_TCTCATAAATGGACG-1   | GSM4626767 | Normal |
| GSM4626767_TCTCATAGTCCAGTAT-1  | GSM4626767 | Normal |
| GSM4626767_TCTCATAGTCTAGGTT-1  | GSM4626767 | Normal |
| GSM4626767_TCTCATAGTTGTGCGC-1  | GSM4626767 | Normal |
| GSM4626767_TCTCATATCATAACGGT-1 | GSM4626767 | Normal |
| GSM4626767_TCTCTAAAGTGCTGCC-1  | GSM4626767 | Normal |
| GSM4626767_TCTCTAAGTTTGTGTG-1  | GSM4626767 | Normal |
| GSM4626767_TCTCTAATCCGGCACA-1  | GSM4626767 | Normal |
| GSM4626767_TCTGAGAAGAACAATC-1  | GSM4626767 | Normal |

|                                |            |        |
|--------------------------------|------------|--------|
| GSM4626767_TCTGAGAAGCCACGTC-1  | GSM4626767 | Normal |
| GSM4626767_TCTGAGAAGCTCCCAG-1  | GSM4626767 | Normal |
| GSM4626767_TCTGAGACAGTCGTGC-1  | GSM4626767 | Normal |
| GSM4626767_TCTGAGAGTTTCGCTAA-1 | GSM4626767 | Normal |
| GSM4626767_TCTGAGAGTTCTGGTA-1  | GSM4626767 | Normal |
| GSM4626767_TCTGAGATCCGCATAA-1  | GSM4626767 | Normal |
| GSM4626767_TCTGAGATCTACGAGT-1  | GSM4626767 | Normal |
| GSM4626767_TCTGGAAGTAGAAAGG-1  | GSM4626767 | Normal |
| GSM4626767_TCTGGAAGTCATGCCG-1  | GSM4626767 | Normal |
| GSM4626767_TCTGGAATCTAACTGG-1  | GSM4626767 | Normal |
| GSM4626767_TCTTCGGAGAAACGCC-1  | GSM4626767 | Normal |
| GSM4626767_TCTTCGGAGCCCAATT-1  | GSM4626767 | Normal |
| GSM4626767_TCTTCGGAGCTAGTTC-1  | GSM4626767 | Normal |
| GSM4626767_TCTTCGGGTCCGACGT-1  | GSM4626767 | Normal |
| GSM4626767_TCTTCGGGTGCGGTAA-1  | GSM4626767 | Normal |
| GSM4626767_TCTTCGGGTGGCTCCA-1  | GSM4626767 | Normal |
| GSM4626767_TCTTCGGGTTCTGGTA-1  | GSM4626767 | Normal |
| GSM4626767_TCTTTCCAGCCAGTTT-1  | GSM4626767 | Normal |
| GSM4626767_TCTTTCCAGGTCGGAT-1  | GSM4626767 | Normal |
| GSM4626767_TCTTTCCAGTGGGATC-1  | GSM4626767 | Normal |
| GSM4626767_TCTTTCCCACCTTGTC-1  | GSM4626767 | Normal |
| GSM4626767_TCTTTCCCTCAAACCGT-1 | GSM4626767 | Normal |
| GSM4626767_TCTTTCCCTCTATCGCC-1 | GSM4626767 | Normal |
| GSM4626767_TGAAAGAAGATCTGAA-1  | GSM4626767 | Normal |
| GSM4626767_TGAAAGACAAGTCTAC-1  | GSM4626767 | Normal |
| GSM4626767_TGAAAGACAAGTTAAG-1  | GSM4626767 | Normal |
| GSM4626767_TGAAAGACAGTCGTGC-1  | GSM4626767 | Normal |
| GSM4626767_TGAAAGACAGTCTTCC-1  | GSM4626767 | Normal |
| GSM4626767_TGAAAGACATCCCACT-1  | GSM4626767 | Normal |
| GSM4626767_TGAAAGACATGCTAGT-1  | GSM4626767 | Normal |
| GSM4626767_TGAAAGAGTACCGAGA-1  | GSM4626767 | Normal |
| GSM4626767_TGAAAGAGTACGAAAT-1  | GSM4626767 | Normal |
| GSM4626767_TGAAAGAGTATGAAAC-1  | GSM4626767 | Normal |
| GSM4626767_TGAAAGAGTCCGCATC-1  | GSM4626767 | Normal |
| GSM4626767_TGAAAGAGTGGGTATG-1  | GSM4626767 | Normal |
| GSM4626767_TGAAAGAGTTACCAGT-1  | GSM4626767 | Normal |
| GSM4626767_TGAAAGATCGTTGACA-1  | GSM4626767 | Normal |
| GSM4626767_TGAAAGATCTTCCTTC-1  | GSM4626767 | Normal |
| GSM4626767_TGACAACCACGTGAGA-1  | GSM4626767 | Normal |
| GSM4626767_TGACAACCAGGTCTCG-1  | GSM4626767 | Normal |
| GSM4626767_TGACAACCATCTACGA-1  | GSM4626767 | Normal |
| GSM4626767_TGACAACGTCCATCCT-1  | GSM4626767 | Normal |
| GSM4626767_TGACAACGTCTTCAAG-1  | GSM4626767 | Normal |
| GSM4626767_TGACAACGTCTTGATG-1  | GSM4626767 | Normal |
| GSM4626767_TGACAACGTGCCTGTG-1  | GSM4626767 | Normal |
| GSM4626767_TGACAACCTCAGTAGT-1  | GSM4626767 | Normal |
| GSM4626767_TGACAACCTCTCACATT-1 | GSM4626767 | Normal |
| GSM4626767_TGACGGCAGCCCGAAA-1  | GSM4626767 | Normal |
| GSM4626767_TGACGGCCAGCTATTG-1  | GSM4626767 | Normal |
| GSM4626767_TGACGGCCATCAGTCA-1  | GSM4626767 | Normal |
| GSM4626767_TGACGGCGTCGCATAT-1  | GSM4626767 | Normal |
| GSM4626767_TGACGGCTCAAACCAC-1  | GSM4626767 | Normal |
| GSM4626767_TGACGGCTCGGTTCCGG-1 | GSM4626767 | Normal |
| GSM4626767_TGACTAGAGGTAGCTG-1  | GSM4626767 | Normal |
| GSM4626767_TGACTAGAGTGACTCT-1  | GSM4626767 | Normal |
| GSM4626767_TGACTAGGTTAAAGAC-1  | GSM4626767 | Normal |
| GSM4626767_TGACTAGTCAGATAAG-1  | GSM4626767 | Normal |

|                                 |            |        |
|---------------------------------|------------|--------|
| GSM4626767_TGACTAGTCCAGAGGA-1   | GSM4626767 | Normal |
| GSM4626767_TGACTTTAGAACTCGG-1   | GSM4626767 | Normal |
| GSM4626767_TGACTTTAGCACAGGT-1   | GSM4626767 | Normal |
| GSM4626767_TGACTTTCATCACAAC-1   | GSM4626767 | Normal |
| GSM4626767_TGACTTTGTAAGAGAG-1   | GSM4626767 | Normal |
| GSM4626767_TGACTTTGTAGAGCTG-1   | GSM4626767 | Normal |
| GSM4626767_TGACTTTGTTATGTGC-1   | GSM4626767 | Normal |
| GSM4626767_TGACTTTTCGCGGATC-1   | GSM4626767 | Normal |
| GSM4626767_TGACTTTTCGGTCTAA-1   | GSM4626767 | Normal |
| GSM4626767_TGACTTTTCTCCGGTT-1   | GSM4626767 | Normal |
| GSM4626767_TGAGAGGAGAAGGTGA-1   | GSM4626767 | Normal |
| GSM4626767_TGAGAGGAGTACGACG-1   | GSM4626767 | Normal |
| GSM4626767_TGAGAGGCAAGACGTG-1   | GSM4626767 | Normal |
| GSM4626767_TGAGAGGGTGACGGTA-1   | GSM4626767 | Normal |
| GSM4626767_TGAGAGGGTGTGGTTT-1   | GSM4626767 | Normal |
| GSM4626767_TGAGAGGTCAGCATGT-1   | GSM4626767 | Normal |
| GSM4626767_TGAGAGGTCTCGGACG-1   | GSM4626767 | Normal |
| GSM4626767_TGAGCATAGGCAGTCA-1   | GSM4626767 | Normal |
| GSM4626767_TGAGCATCAAAGTCAA-1   | GSM4626767 | Normal |
| GSM4626767_TGAGCATGTAGCTTGT-1   | GSM4626767 | Normal |
| GSM4626767_TGAGCATGTCATATCG-1   | GSM4626767 | Normal |
| GSM4626767_TGAGCCGAGTGAACAT-1   | GSM4626767 | Normal |
| GSM4626767_TGAGCCGCAATTGCTG-1   | GSM4626767 | Normal |
| GSM4626767_TGAGCCGCACATGACT-1   | GSM4626767 | Normal |
| GSM4626767_TGAGCCGCACGCTTTC-1   | GSM4626767 | Normal |
| GSM4626767_TGAGCCGCATTAGCCA-1   | GSM4626767 | Normal |
| GSM4626767_TGAGCCGGTCTAAAGA-1   | GSM4626767 | Normal |
| GSM4626767_TGAGCCGTCCAAAGTC-1   | GSM4626767 | Normal |
| GSM4626767_TGAGGGAAGGCAATTA-1   | GSM4626767 | Normal |
| GSM4626767_TGAGGGAAGTGAACAT-1   | GSM4626767 | Normal |
| GSM4626767_TGAGGGAAGTTACGGG-1   | GSM4626767 | Normal |
| GSM4626767_TGAGGGACACGAGGTA-1   | GSM4626767 | Normal |
| GSM4626767_TGAGGGAGTCCCTACT-1   | GSM4626767 | Normal |
| GSM4626767_TGAGGGAGTCGAATCT-1   | GSM4626767 | Normal |
| GSM4626767_TGAGGGATCGTTGACA-1   | GSM4626767 | Normal |
| GSM4626767_TGATTTTCAGGCAGTCA-1  | GSM4626767 | Normal |
| GSM4626767_TGATTTTCAGTTAGCGG-1  | GSM4626767 | Normal |
| GSM4626767_TGATTTTCCAATGTTGC-1  | GSM4626767 | Normal |
| GSM4626767_TGATTTTCGTTCGGCATC-1 | GSM4626767 | Normal |
| GSM4626767_TGATTTTCGTCTCATCC-1  | GSM4626767 | Normal |
| GSM4626767_TGATTTTCGTTAGAACA-1  | GSM4626767 | Normal |
| GSM4626767_TGATTTTCGTTGGTGGA-1  | GSM4626767 | Normal |
| GSM4626767_TGATTTCTCAGCGACC-1   | GSM4626767 | Normal |
| GSM4626767_TGATTTCTCCGAATGT-1   | GSM4626767 | Normal |
| GSM4626767_TGCACCTAGAAGAAGC-1   | GSM4626767 | Normal |
| GSM4626767_TGCACCTAGAGGGCTT-1   | GSM4626767 | Normal |
| GSM4626767_TGCACCTAGGCCCGTT-1   | GSM4626767 | Normal |
| GSM4626767_TGCACCTCAGTACACT-1   | GSM4626767 | Normal |
| GSM4626767_TGCACCTCATCGGACC-1   | GSM4626767 | Normal |
| GSM4626767_TGCACCTTCCTCATTA-1   | GSM4626767 | Normal |
| GSM4626767_TGCACCTTCGTTACAG-1   | GSM4626767 | Normal |
| GSM4626767_TGCCAAAAGGTCATCT-1   | GSM4626767 | Normal |
| GSM4626767_TGCCAAAAGTCGTACT-1   | GSM4626767 | Normal |
| GSM4626767_TGCCAAACAGCTCGCA-1   | GSM4626767 | Normal |
| GSM4626767_TGCCAAAGTCGGCATC-1   | GSM4626767 | Normal |
| GSM4626767_TGCCAAAGTTCAGGCC-1   | GSM4626767 | Normal |
| GSM4626767_TGCCAAATCGAGAACG-1   | GSM4626767 | Normal |

|                                |            |        |
|--------------------------------|------------|--------|
| GSM4626767_TGCCCATAGGGTTTCT-1  | GSM4626767 | Normal |
| GSM4626767_TGCCCATAGTGGGTTG-1  | GSM4626767 | Normal |
| GSM4626767_TGCCCATGTACAAGTA-1  | GSM4626767 | Normal |
| GSM4626767_TGCCCATGTAGCGTGA-1  | GSM4626767 | Normal |
| GSM4626767_TGCCCATGTGCACTTA-1  | GSM4626767 | Normal |
| GSM4626767_TGCCCTAAGGACATTA-1  | GSM4626767 | Normal |
| GSM4626767_TGCCCTACAGTACACT-1  | GSM4626767 | Normal |
| GSM4626767_TGCCCTACATGTAGTC-1  | GSM4626767 | Normal |
| GSM4626767_TGCCCTACATGTTCCC-1  | GSM4626767 | Normal |
| GSM4626767_TGCGCAGAGAGTACAT-1  | GSM4626767 | Normal |
| GSM4626767_TGCGCAGAGCAGCGTA-1  | GSM4626767 | Normal |
| GSM4626767_TGCGCAGAGTGGACGT-1  | GSM4626767 | Normal |
| GSM4626767_TGCGCAGAGTGGAGAA-1  | GSM4626767 | Normal |
| GSM4626767_TGCGCAGCAGCCACCA-1  | GSM4626767 | Normal |
| GSM4626767_TGCGCAGGTAGCAAAT-1  | GSM4626767 | Normal |
| GSM4626767_TGCGCAGGTCACTTCC-1  | GSM4626767 | Normal |
| GSM4626767_TGCGCAGGTCATGCCG-1  | GSM4626767 | Normal |
| GSM4626767_TGCGCAGGTGGCTCCA-1  | GSM4626767 | Normal |
| GSM4626767_TGCGCAGGTTTAAGCC-1  | GSM4626767 | Normal |
| GSM4626767_TGCGCAGTCAACGGTTA-1 | GSM4626767 | Normal |
| GSM4626767_TGCGCAGTCCGCAGTG-1  | GSM4626767 | Normal |
| GSM4626767_TGCGGGTAGATCCCAT-1  | GSM4626767 | Normal |
| GSM4626767_TGCGGGTAGGAACTGC-1  | GSM4626767 | Normal |
| GSM4626767_TGCGGGTAGGCATGTG-1  | GSM4626767 | Normal |
| GSM4626767_TGCGGGTCAACGATGG-1  | GSM4626767 | Normal |
| GSM4626767_TGCGGGTCATGCTAGT-1  | GSM4626767 | Normal |
| GSM4626767_TGCGGGTGTAATGTG-1   | GSM4626767 | Normal |
| GSM4626767_TGCGGGTGCTTGTCC-1   | GSM4626767 | Normal |
| GSM4626767_TGCGGGTGTTTGTG-1    | GSM4626767 | Normal |
| GSM4626767_TGCGGGTGTTCTCATT-1  | GSM4626767 | Normal |
| GSM4626767_TGCGGGTTCAGTCCCT-1  | GSM4626767 | Normal |
| GSM4626767_TGCGGGTTCATCGATG-1  | GSM4626767 | Normal |
| GSM4626767_TGCGGGTTCCTACCGC-1  | GSM4626767 | Normal |
| GSM4626767_TGCGGGTTCCTGCCGT-1  | GSM4626767 | Normal |
| GSM4626767_TGCGTGGAGGAGTTTA-1  | GSM4626767 | Normal |
| GSM4626767_TGCGTGGAGGATATAC-1  | GSM4626767 | Normal |
| GSM4626767_TGCGTGGAGTGTGGCA-1  | GSM4626767 | Normal |
| GSM4626767_TGCGTGGAGTTACCCA-1  | GSM4626767 | Normal |
| GSM4626767_TGCGTGGCAAGGTTTC-1  | GSM4626767 | Normal |
| GSM4626767_TGCGTGGGTCTAGCGC-1  | GSM4626767 | Normal |
| GSM4626767_TGCGTGGGTTCCACAA-1  | GSM4626767 | Normal |
| GSM4626767_TGCGTGGTCAGTTCA-1   | GSM4626767 | Normal |
| GSM4626767_TGCGTGGTCGGTGTTA-1  | GSM4626767 | Normal |
| GSM4626767_TGCGTGGTCTCCTATA-1  | GSM4626767 | Normal |
| GSM4626767_TGCGTGGTCTTCTGGC-1  | GSM4626767 | Normal |
| GSM4626767_TGCTACCAGATCCGAG-1  | GSM4626767 | Normal |
| GSM4626767_TGCTACCCACCAGTTA-1  | GSM4626767 | Normal |
| GSM4626767_TGCTACCCAGACGTAG-1  | GSM4626767 | Normal |
| GSM4626767_TGCTACCTCAGGCAAG-1  | GSM4626767 | Normal |
| GSM4626767_TGCTACCTCAGTTTGG-1  | GSM4626767 | Normal |
| GSM4626767_TGCTACCTCCTTAATC-1  | GSM4626767 | Normal |
| GSM4626767_TGCTGCTCACTTCGAA-1  | GSM4626767 | Normal |
| GSM4626767_TGCTGCTCAGGTTTCA-1  | GSM4626767 | Normal |
| GSM4626767_TGCTGCTTCTGCAAGT-1  | GSM4626767 | Normal |
| GSM4626767_TGGACGCAGAGGTACC-1  | GSM4626767 | Normal |
| GSM4626767_TGGACGCAGTGTGGCA-1  | GSM4626767 | Normal |
| GSM4626767_TGGACGCCATCGGAAG-1  | GSM4626767 | Normal |

|                                |            |        |
|--------------------------------|------------|--------|
| GSM4626767_TGGACGCGTACAGACG-1  | GSM4626767 | Normal |
| GSM4626767_TGGACGCGTGCAGTAG-1  | GSM4626767 | Normal |
| GSM4626767_TGGACGCGTTACGACT-1  | GSM4626767 | Normal |
| GSM4626767_TGGACGCTCAACGCTA-1  | GSM4626767 | Normal |
| GSM4626767_TGGACGCTCGGCGCTA-1  | GSM4626767 | Normal |
| GSM4626767_TGGCCAGCAGTCAGCC-1  | GSM4626767 | Normal |
| GSM4626767_TGGCCAGGTCAGATAA-1  | GSM4626767 | Normal |
| GSM4626767_TGGCCAGGTCTCTCTG-1  | GSM4626767 | Normal |
| GSM4626767_TGGCCAGGTGCAACTT-1  | GSM4626767 | Normal |
| GSM4626767_TGGCCAGTCAACACTG-1  | GSM4626767 | Normal |
| GSM4626767_TGGCCAGTCGCAAGCC-1  | GSM4626767 | Normal |
| GSM4626767_TGGCGCAAGCCTATGT-1  | GSM4626767 | Normal |
| GSM4626767_TGGCGCAAGCGTCTAT-1  | GSM4626767 | Normal |
| GSM4626767_TGGCGCAAGCTATGCT-1  | GSM4626767 | Normal |
| GSM4626767_TGGCGCAAGTACACCT-1  | GSM4626767 | Normal |
| GSM4626767_TGGCGCAAGTTGAGTA-1  | GSM4626767 | Normal |
| GSM4626767_TGGCGCACAAGAAGAG-1  | GSM4626767 | Normal |
| GSM4626767_TGGCGCACATCGGAAG-1  | GSM4626767 | Normal |
| GSM4626767_TGGCGCAGTAAACGCG-1  | GSM4626767 | Normal |
| GSM4626767_TGGCGCAGTCTGCGGT-1  | GSM4626767 | Normal |
| GSM4626767_TGGCGCATCGACAGCC-1  | GSM4626767 | Normal |
| GSM4626767_TGGCTGGAGACTAAGT-1  | GSM4626767 | Normal |
| GSM4626767_TGGCTGGAGGGTTCCC-1  | GSM4626767 | Normal |
| GSM4626767_TGGCTGGAGTATGACA-1  | GSM4626767 | Normal |
| GSM4626767_TGGCTGGAGTTAACGA-1  | GSM4626767 | Normal |
| GSM4626767_TGGCTGGCAGCGTTCG-1  | GSM4626767 | Normal |
| GSM4626767_TGGCTGGCAGGTCCAC-1  | GSM4626767 | Normal |
| GSM4626767_TGGCTGGGTATATGGA-1  | GSM4626767 | Normal |
| GSM4626767_TGGCTGGGTGTCAATC-1  | GSM4626767 | Normal |
| GSM4626767_TGGCTGGTCTCTAAGG-1  | GSM4626767 | Normal |
| GSM4626767_TGGGAAGAGGCGCTCT-1  | GSM4626767 | Normal |
| GSM4626767_TGGGAAGAGGGCATGT-1  | GSM4626767 | Normal |
| GSM4626767_TGGGAAGCAGTTCCCT-1  | GSM4626767 | Normal |
| GSM4626767_TGGGAAGGTAAGAGGA-1  | GSM4626767 | Normal |
| GSM4626767_TGGGAAGGTATCAGTC-1  | GSM4626767 | Normal |
| GSM4626767_TGGGAAGGTCTTCAAG-1  | GSM4626767 | Normal |
| GSM4626767_TGGGAAGTCGTAGGAG-1  | GSM4626767 | Normal |
| GSM4626767_TGGGAAGTCTAACTTC-1  | GSM4626767 | Normal |
| GSM4626767_TGGGCGTAGCTAGTGG-1  | GSM4626767 | Normal |
| GSM4626767_TGGGCGTAGGAATCGC-1  | GSM4626767 | Normal |
| GSM4626767_TGGGCGTGTTTAGCTG-1  | GSM4626767 | Normal |
| GSM4626767_TGGGCGTTCGGTAGGC-1  | GSM4626767 | Normal |
| GSM4626767_TGGGCGTTCGCTGCT-1   | GSM4626767 | Normal |
| GSM4626767_TGGTTAGCACGCATCG-1  | GSM4626767 | Normal |
| GSM4626767_TGGTTAGCATATACCG-1  | GSM4626767 | Normal |
| GSM4626767_TGGTTAGCATCGACGC-1  | GSM4626767 | Normal |
| GSM4626767_TGGTTAGGTGGAAGA-1   | GSM4626767 | Normal |
| GSM4626767_TGGTTCCAGTCATCCA-1  | GSM4626767 | Normal |
| GSM4626767_TGGTTCCCACCAGGTC-1  | GSM4626767 | Normal |
| GSM4626767_TGGTTCCCATCATCCC-1  | GSM4626767 | Normal |
| GSM4626767_TGGTTCCGTAGCTAAA-1  | GSM4626767 | Normal |
| GSM4626767_TGGTTCCCTCAACGGGA-1 | GSM4626767 | Normal |
| GSM4626767_TGGTTCCCTCATTCACT-1 | GSM4626767 | Normal |
| GSM4626767_TGGTTCCCTCCGAAGAG-1 | GSM4626767 | Normal |
| GSM4626767_TGGTTCCCTCGCCGTGA-1 | GSM4626767 | Normal |
| GSM4626767_TGTATTAGATATGCA-1   | GSM4626767 | Normal |
| GSM4626767_TGTATTAGTCCCACG-1   | GSM4626767 | Normal |

|                                |            |        |
|--------------------------------|------------|--------|
| GSM4626767_TGTATTCAGTGTCCCG-1  | GSM4626767 | Normal |
| GSM4626767_TGTATTCGTAACGACG-1  | GSM4626767 | Normal |
| GSM4626767_TGTATTCGTCGCCATG-1  | GSM4626767 | Normal |
| GSM4626767_TGTCCCAAGAGGGCTT-1  | GSM4626767 | Normal |
| GSM4626767_TGTCCCAAGCCCTAAT-1  | GSM4626767 | Normal |
| GSM4626767_TGTCCCAAGGTACTCT-1  | GSM4626767 | Normal |
| GSM4626767_TGTCCCACATGTCGAT-1  | GSM4626767 | Normal |
| GSM4626767_TGTCCAGTTGCTCCT-1   | GSM4626767 | Normal |
| GSM4626767_TGTCCCATCGTTTATC-1  | GSM4626767 | Normal |
| GSM4626767_TGTGGTAAGAGCTGCA-1  | GSM4626767 | Normal |
| GSM4626767_TGTGGTAAGCGTAATA-1  | GSM4626767 | Normal |
| GSM4626767_TGTGGTACAGTCAGCC-1  | GSM4626767 | Normal |
| GSM4626767_TGTGGTAGTCGCTTCT-1  | GSM4626767 | Normal |
| GSM4626767_TGTGGTAGTTCTGGTA-1  | GSM4626767 | Normal |
| GSM4626767_TGTGGTATCTGATACG-1  | GSM4626767 | Normal |
| GSM4626767_TGTGTTTAGGCAAAGA-1  | GSM4626767 | Normal |
| GSM4626767_TGTGTTTAGGTAGCCA-1  | GSM4626767 | Normal |
| GSM4626767_TGTGTTTCACCCATC-1   | GSM4626767 | Normal |
| GSM4626767_TGTGTTTGTACCGTAT-1  | GSM4626767 | Normal |
| GSM4626767_TGTGTTTGTCTCACCT-1  | GSM4626767 | Normal |
| GSM4626767_TGTGTTTGTGTGAAAT-1  | GSM4626767 | Normal |
| GSM4626767_TGTGTTTTCTCATT-1    | GSM4626767 | Normal |
| GSM4626767_TGTGTTTTCGGTGTTA-1  | GSM4626767 | Normal |
| GSM4626767_TGTGTTTTCTATGTGG-1  | GSM4626767 | Normal |
| GSM4626767_TGTTCCGAGATCCTGT-1  | GSM4626767 | Normal |
| GSM4626767_TGTTCCGAGGCATTGG-1  | GSM4626767 | Normal |
| GSM4626767_TGTTCCGCACATTGCA-1  | GSM4626767 | Normal |
| GSM4626767_TGTTCCGGTTCGCGAC-1  | GSM4626767 | Normal |
| GSM4626767_TGTTCCGTGAGATAAG-1  | GSM4626767 | Normal |
| GSM4626767_TGTTCCGTCTGCGGCA-1  | GSM4626767 | Normal |
| GSM4626767_TGTTCCGTCTGGTTCC-1  | GSM4626767 | Normal |
| GSM4626767_TTAACCTCACACCGCA-1  | GSM4626767 | Normal |
| GSM4626767_TTAACCTCAGACGCTC-1  | GSM4626767 | Normal |
| GSM4626767_TTAACCTCAGCTATTG-1  | GSM4626767 | Normal |
| GSM4626767_TTAACCTCAGGGATTG-1  | GSM4626767 | Normal |
| GSM4626767_TTAACCTCGTAAGGAA-1  | GSM4626767 | Normal |
| GSM4626767_TTAACCTCGTACTTAGC-1 | GSM4626767 | Normal |
| GSM4626767_TTAACCTCGTAGGACAC-1 | GSM4626767 | Normal |
| GSM4626767_TTAACCTCGTGAAAT-1   | GSM4626767 | Normal |
| GSM4626767_TTAACCTCGTTCCAACA-1 | GSM4626767 | Normal |
| GSM4626767_TTAGGACAGAGACTTA-1  | GSM4626767 | Normal |
| GSM4626767_TTAGGACAGGCTATCT-1  | GSM4626767 | Normal |
| GSM4626767_TTAGGACAGTACGACG-1  | GSM4626767 | Normal |
| GSM4626767_TTAGGACCACAGTCGC-1  | GSM4626767 | Normal |
| GSM4626767_TTAGGACCACGTAAGG-1  | GSM4626767 | Normal |
| GSM4626767_TTAGGACGTGTGACGA-1  | GSM4626767 | Normal |
| GSM4626767_TTAGGACGTTGGACCC-1  | GSM4626767 | Normal |
| GSM4626767_TTAGGACTCACATGCA-1  | GSM4626767 | Normal |
| GSM4626767_TTAGGACTCATCTGCC-1  | GSM4626767 | Normal |
| GSM4626767_TTAGGACTCTAAGCCA-1  | GSM4626767 | Normal |
| GSM4626767_TTAGGCAAGCACCGCT-1  | GSM4626767 | Normal |
| GSM4626767_TTAGGCAAGCGTAGTG-1  | GSM4626767 | Normal |
| GSM4626767_TTAGGCAAGCGTAGTG-1  | GSM4626767 | Normal |
| GSM4626767_TTAGGCAAGGACGAAA-1  | GSM4626767 | Normal |
| GSM4626767_TTAGGCACAGCCTTTC-1  | GSM4626767 | Normal |
| GSM4626767_TTAGGCACATAAGACA-1  | GSM4626767 | Normal |
| GSM4626767_TTAGGCACATCCCATC-1  | GSM4626767 | Normal |



|                                |            |        |
|--------------------------------|------------|--------|
| GSM4626767_TTAGGCAGTCGCCATG-1  | GSM4626767 | Normal |
| GSM4626767_TTAGGCAGTTATGTGC-1  | GSM4626767 | Normal |
| GSM4626767_TTAGGCATCACCGGGT-1  | GSM4626767 | Normal |
| GSM4626767_TTAGGCATCAGAGACG-1  | GSM4626767 | Normal |
| GSM4626767_TTAGGCATCTGCTTGC-1  | GSM4626767 | Normal |
| GSM4626767_TTAGTTCCACCTCGGA-1  | GSM4626767 | Normal |
| GSM4626767_TTAGTTCGTCTTCAAG-1  | GSM4626767 | Normal |
| GSM4626767_TTAGTTCTCTCCAGGG-1  | GSM4626767 | Normal |
| GSM4626767_TTAGTTCTCTGCCAGG-1  | GSM4626767 | Normal |
| GSM4626767_TTATGCTAGGATGGTC-1  | GSM4626767 | Normal |
| GSM4626767_TTATGCTCATCCATC-1   | GSM4626767 | Normal |
| GSM4626767_TTATGCTGTCATGCCG-1  | GSM4626767 | Normal |
| GSM4626767_TTATGCTGTTCTGGTA-1  | GSM4626767 | Normal |
| GSM4626767_TTCCCAGAGATCACGG-1  | GSM4626767 | Normal |
| GSM4626767_TTCCCAGAGGTTCTTA-1  | GSM4626767 | Normal |
| GSM4626767_TTCCCAGCAGCCACCA-1  | GSM4626767 | Normal |
| GSM4626767_TTCCCAGGTGTGCCTG-1  | GSM4626767 | Normal |
| GSM4626767_TTCCCAGTCACCAGGC-1  | GSM4626767 | Normal |
| GSM4626767_TTCCCAGTCGAACTGT-1  | GSM4626767 | Normal |
| GSM4626767_TTCCCAGTCTCGCTTG-1  | GSM4626767 | Normal |
| GSM4626767_TTCCCAGTCTGCAAGT-1  | GSM4626767 | Normal |
| GSM4626767_TTCCAAGAGCGAGAAA-1  | GSM4626767 | Normal |
| GSM4626767_TTCCAAGCAATGGTCT-1  | GSM4626767 | Normal |
| GSM4626767_TTCCAAGCACAGACTT-1  | GSM4626767 | Normal |
| GSM4626767_TTCCAAGCAGTACACT-1  | GSM4626767 | Normal |
| GSM4626767_TTCCAAGCATGAACCT-1  | GSM4626767 | Normal |
| GSM4626767_TTCCAAGGTGGCAAAC-1  | GSM4626767 | Normal |
| GSM4626767_TTCCAAGTCAACGGCC-1  | GSM4626767 | Normal |
| GSM4626767_TTCCAAGTCCACGTTT-1  | GSM4626767 | Normal |
| GSM4626767_TTCCAAGTCCAGGGCT-1  | GSM4626767 | Normal |
| GSM4626767_TTCCAAGTCCTTAATC-1  | GSM4626767 | Normal |
| GSM4626767_TTCCAAGTCGCGTAGC-1  | GSM4626767 | Normal |
| GSM4626767_TTCCAAGTCTTGATC-1   | GSM4626767 | Normal |
| GSM4626767_TTCCGGTCAGGCTAGGT-1 | GSM4626767 | Normal |
| GSM4626767_TTCCGGTCAGTGCCAGA-1 | GSM4626767 | Normal |
| GSM4626767_TTCCGGTCAGTTGAGAT-1 | GSM4626767 | Normal |
| GSM4626767_TTCCGGTCCAGCTGTAT-1 | GSM4626767 | Normal |
| GSM4626767_TTCCGGTCGTATCGCAT-1 | GSM4626767 | Normal |
| GSM4626767_TTCCGGTCGTGAGTGA-1  | GSM4626767 | Normal |
| GSM4626767_TTCCGGTCGTTAAAGTG-1 | GSM4626767 | Normal |
| GSM4626767_TTCTACAAGCGCCTTG-1  | GSM4626767 | Normal |
| GSM4626767_TTCTACAAGCTCCTTC-1  | GSM4626767 | Normal |
| GSM4626767_TTCTACAAGGTAGCCA-1  | GSM4626767 | Normal |
| GSM4626767_TTCTACACAATCACAC-1  | GSM4626767 | Normal |
| GSM4626767_TTCTACACAGCCTATA-1  | GSM4626767 | Normal |
| GSM4626767_TTCTACAGTAGTGAAT-1  | GSM4626767 | Normal |
| GSM4626767_TTCTACAGTGCAGTAG-1  | GSM4626767 | Normal |
| GSM4626767_TTCTACAGTTCCAACA-1  | GSM4626767 | Normal |
| GSM4626767_TTCTACATCTTCTGGC-1  | GSM4626767 | Normal |
| GSM4626767_TTCTCAAAGAAGCCCA-1  | GSM4626767 | Normal |
| GSM4626767_TTCTCAAAGAGTCGGT-1  | GSM4626767 | Normal |
| GSM4626767_TTCTCAAAGCGTAATA-1  | GSM4626767 | Normal |
| GSM4626767_TTCTCAACAACGCACC-1  | GSM4626767 | Normal |
| GSM4626767_TTCTCAACATGGTTGT-1  | GSM4626767 | Normal |
| GSM4626767_TTCTCAAGTAGGCATG-1  | GSM4626767 | Normal |
| GSM4626767_TTCTCAAGTATCACCA-1  | GSM4626767 | Normal |
| GSM4626767_TTCTCAAGTCTCTCGT-1  | GSM4626767 | Normal |

|                                 |            |        |
|---------------------------------|------------|--------|
| GSM4626767_TTCTCAAGTTAGTGGG-1   | GSM4626767 | Normal |
| GSM4626767_TTCTCAATCCACGACG-1   | GSM4626767 | Normal |
| GSM4626767_TTCTCCTCACCCATGG-1   | GSM4626767 | Normal |
| GSM4626767_TTCTCCTCATCAGTAC-1   | GSM4626767 | Normal |
| GSM4626767_TTCTCCTGTCAATGTC-1   | GSM4626767 | Normal |
| GSM4626767_TTCTCCTGTAAAGATG-1   | GSM4626767 | Normal |
| GSM4626767_TTCTCCTTCGTCGTTT-1   | GSM4626767 | Normal |
| GSM4626767_TTCTTAGCAAGCCTAT-1   | GSM4626767 | Normal |
| GSM4626767_TTCTTAGCAGACGCTC-1   | GSM4626767 | Normal |
| GSM4626767_TTCTTAGGTCTTCGTC-1   | GSM4626767 | Normal |
| GSM4626767_TTCTTAGGTCTTGCGG-1   | GSM4626767 | Normal |
| GSM4626767_TTCTTAGGTGGAAAGA-1   | GSM4626767 | Normal |
| GSM4626767_TTCTTAGTCCGAAGAG-1   | GSM4626767 | Normal |
| GSM4626767_TTCTTAGTCGCAGGCT-1   | GSM4626767 | Normal |
| GSM4626767_TTGAACGAGCTGAAAT-1   | GSM4626767 | Normal |
| GSM4626767_TTGAACGCAACACGCC-1   | GSM4626767 | Normal |
| GSM4626767_TTGAACGCAAGTCTAC-1   | GSM4626767 | Normal |
| GSM4626767_TTGAACGCAAGTCTGT-1   | GSM4626767 | Normal |
| GSM4626767_TTGAACGGTCCGTGAC-1   | GSM4626767 | Normal |
| GSM4626767_TTGAACGGTCTCCATC-1   | GSM4626767 | Normal |
| GSM4626767_TTGAACGTCGTCCAGG-1   | GSM4626767 | Normal |
| GSM4626767_TTGAACGTCTACTATC-1   | GSM4626767 | Normal |
| GSM4626767_TTGACTTAGACAGAGA-1   | GSM4626767 | Normal |
| GSM4626767_TTGACTTAGGACGAAA-1   | GSM4626767 | Normal |
| GSM4626767_TTGACTTCAAAGTGCG-1   | GSM4626767 | Normal |
| GSM4626767_TTGACTTCAAGAGTCG-1   | GSM4626767 | Normal |
| GSM4626767_TTGACTTGTAGTACCT-1   | GSM4626767 | Normal |
| GSM4626767_TTGACTTGTATTAGCC-1   | GSM4626767 | Normal |
| GSM4626767_TTGACTTGTCTACCTC-1   | GSM4626767 | Normal |
| GSM4626767_TTGACTTTCACGAAGG-1   | GSM4626767 | Normal |
| GSM4626767_TTGACTTTCGCGTAGC-1   | GSM4626767 | Normal |
| GSM4626767_TTGACTTTCGCTGATA-1   | GSM4626767 | Normal |
| GSM4626767_TTGCCGTAGAGTCTGG-1   | GSM4626767 | Normal |
| GSM4626767_TTGCCGTCATCAGTCA-1   | GSM4626767 | Normal |
| GSM4626767_TTGCCGTCATGAAGTA-1   | GSM4626767 | Normal |
| GSM4626767_TTGCCGTGTCCTTTG-1    | GSM4626767 | Normal |
| GSM4626767_TTGCCGTTCAACGCTA-1   | GSM4626767 | Normal |
| GSM4626767_TTGCCGTTCTACCTGC-1   | GSM4626767 | Normal |
| GSM4626767_TTGCGTCAGGCAATTA-1   | GSM4626767 | Normal |
| GSM4626767_TTGCGTCCACCAGATT-1   | GSM4626767 | Normal |
| GSM4626767_TTGCGTCCACCAGCAC-1   | GSM4626767 | Normal |
| GSM4626767_TTGCGTCCAGATTGCT-1   | GSM4626767 | Normal |
| GSM4626767_TTGCGTCCAGCTCGAC-1   | GSM4626767 | Normal |
| GSM4626767_TTGCGTCGTCCCTTGT-1   | GSM4626767 | Normal |
| GSM4626767_TTGCGTCGTTTACTCT-1   | GSM4626767 | Normal |
| GSM4626767_TTGCGTCTCCTATGTT-1   | GSM4626767 | Normal |
| GSM4626767_TTGGAACAGATGGCGT-1   | GSM4626767 | Normal |
| GSM4626767_TTGGAACAGGACTGGT-1   | GSM4626767 | Normal |
| GSM4626767_TTGGAACAGTACGACG-1   | GSM4626767 | Normal |
| GSM4626767_TTGGAACAGTGGAGT-1    | GSM4626767 | Normal |
| GSM4626767_TTGGAACGTCCAAGTT-1   | GSM4626767 | Normal |
| GSM4626767_TTGGAACACTCAAACAC-1  | GSM4626767 | Normal |
| GSM4626767_TTGGAACAAAGCTAACTC-1 | GSM4626767 | Normal |
| GSM4626767_TTGGAACAGTCAAACCTC-1 | GSM4626767 | Normal |
| GSM4626767_TTGGAACAGTGTGAAAT-1  | GSM4626767 | Normal |
| GSM4626767_TTGGAACATCGCGATCG-1  | GSM4626767 | Normal |
| GSM4626767_TTGTAGGAGGTGTGGT-1   | GSM4626767 | Normal |

|                                |            |        |
|--------------------------------|------------|--------|
| GSM4626767_TTGTAGGCAAAGGCGT-1  | GSM4626767 | Normal |
| GSM4626767_TTGTAGGCAAGCTGGA-1  | GSM4626767 | Normal |
| GSM4626767_TTGTAGGCATGCCTTC-1  | GSM4626767 | Normal |
| GSM4626767_TTGTAGGGTATAGGTA-1  | GSM4626767 | Normal |
| GSM4626767_TTGTAGGGTTCATGGT-1  | GSM4626767 | Normal |
| GSM4626767_TTGTAGGTCACCATAG-1  | GSM4626767 | Normal |
| GSM4626767_TTGTAGGTCATGGTCA-1  | GSM4626767 | Normal |
| GSM4626767_TTGTAGGTCTGCGACG-1  | GSM4626767 | Normal |
| GSM4626767_TTTACTGAGACCACGA-1  | GSM4626767 | Normal |
| GSM4626767_TTTACTGCAAGTCTGT-1  | GSM4626767 | Normal |
| GSM4626767_TTTACTGCAATGACCT-1  | GSM4626767 | Normal |
| GSM4626767_TTTACTGCATATACGC-1  | GSM4626767 | Normal |
| GSM4626767_TTTACTGGTCTAGCGC-1  | GSM4626767 | Normal |
| GSM4626767_TTTACTGGTGACCAAG-1  | GSM4626767 | Normal |
| GSM4626767_TTTACTGGTGTGACCC-1  | GSM4626767 | Normal |
| GSM4626767_TTTACTGGTTGGACCC-1  | GSM4626767 | Normal |
| GSM4626767_TTTACTGTCAGTGTTG-1  | GSM4626767 | Normal |
| GSM4626767_TTTACTGTCCGCATAA-1  | GSM4626767 | Normal |
| GSM4626767_TTTACTGTCCTAGTGA-1  | GSM4626767 | Normal |
| GSM4626767_TTTACTGTCCTTAATC-1  | GSM4626767 | Normal |
| GSM4626767_TTTATGCCACATCCAA-1  | GSM4626767 | Normal |
| GSM4626767_TTTATGCGTTCACGGC-1  | GSM4626767 | Normal |
| GSM4626767_TTTATGCGTTTGCATG-1  | GSM4626767 | Normal |
| GSM4626767_TTTATGCTCCCAAGAT-1  | GSM4626767 | Normal |
| GSM4626767_TTTCCTCAGCTAGTTC-1  | GSM4626767 | Normal |
| GSM4626767_TTTCCTCAGTGGAGTC-1  | GSM4626767 | Normal |
| GSM4626767_TTTCCTCCAAAGGCGT-1  | GSM4626767 | Normal |
| GSM4626767_TTTCCTCCACGAAGCA-1  | GSM4626767 | Normal |
| GSM4626767_TTTCCTCCAGACAGGT-1  | GSM4626767 | Normal |
| GSM4626767_TTTCCTCTCCCTGACT-1  | GSM4626767 | Normal |
| GSM4626767_TTTCCTCTCGCACTCT-1  | GSM4626767 | Normal |
| GSM4626767_TTTCCTCTCTCTAAGG-1  | GSM4626767 | Normal |
| GSM4626767_TTTGCGCAGAGTTAT-1   | GSM4626767 | Normal |
| GSM4626767_TTTGCGCAGAGTACCG-1  | GSM4626767 | Normal |
| GSM4626767_TTTGCGCCAGGTCCAC-1  | GSM4626767 | Normal |
| GSM4626767_TTTGCGCCATACGCCG-1  | GSM4626767 | Normal |
| GSM4626767_TTTGCGCCATACGCTA-1  | GSM4626767 | Normal |
| GSM4626767_TTTGCGCGTACCGGCT-1  | GSM4626767 | Normal |
| GSM4626767_TTTGCGCGTACTTAGC-1  | GSM4626767 | Normal |
| GSM4626767_TTTGCGCGTAGCTTGT-1  | GSM4626767 | Normal |
| GSM4626767_TTTGCGCTCAGTCAGT-1  | GSM4626767 | Normal |
| GSM4626767_TTTGCGCTCCTCTAGC-1  | GSM4626767 | Normal |
| GSM4626767_TTTGCGCTCGGCGCTA-1  | GSM4626767 | Normal |
| GSM4626767_TTTGCGCTCGTCCGTT-1  | GSM4626767 | Normal |
| GSM4626767_TTTGGTTAGCTAGCCC-1  | GSM4626767 | Normal |
| GSM4626767_TTTGGTTCAGCCAGAA-1  | GSM4626767 | Normal |
| GSM4626767_TTTGGTTCATGCATGT-1  | GSM4626767 | Normal |
| GSM4626767_TTTGGTTGTCTTCGTC-1  | GSM4626767 | Normal |
| GSM4626767_TTTGGTTGTTCTGCTC-1  | GSM4626767 | Normal |
| GSM4626767_TTTGGTTTCAGCTCTC-1  | GSM4626767 | Normal |
| GSM4626767_TTTGGTTTCCTCCTAG-1  | GSM4626767 | Normal |
| GSM4626767_TTTGGTTTCGTTACAG-1  | GSM4626767 | Normal |
| GSM4626767_TTTGGTTTCTGCTGCT-1  | GSM4626767 | Normal |
| GSM4626767_TTTGTCAAGGAGTTGC-1  | GSM4626767 | Normal |
| GSM4626767_TTTGTCAAGGATGCGT-1  | GSM4626767 | Normal |
| GSM4626767_TTTGTCAACTGAAGG-1   | GSM4626767 | Normal |
| GSM4626767_TTTGTCAAGTACCGCTG-1 | GSM4626767 | Normal |

|                                |            |        |
|--------------------------------|------------|--------|
| GSM4626767_TTTGTCATCCTGCCAT-1  | GSM4626767 | Normal |
| GSM4626768_AAACCTGAGATATGGT-1  | GSM4626768 | Normal |
| GSM4626768_AAACCTGAGTGAATTG-1  | GSM4626768 | Normal |
| GSM4626768_AAACCTGGTACAAGTA-1  | GSM4626768 | Normal |
| GSM4626768_AAACCTGGTCCCTACT-1  | GSM4626768 | Normal |
| GSM4626768_AAACCTGGTCCGAGTC-1  | GSM4626768 | Normal |
| GSM4626768_AAACCTGGTCTAGTCA-1  | GSM4626768 | Normal |
| GSM4626768_AAACCTGTCTCTAGGA-1  | GSM4626768 | Normal |
| GSM4626768_AAACGGGAGCACAGGT-1  | GSM4626768 | Normal |
| GSM4626768_AAACGGGAGCAGGTCA-1  | GSM4626768 | Normal |
| GSM4626768_AAACGGGAGCCACGCT-1  | GSM4626768 | Normal |
| GSM4626768_AAACGGGAGCGTGAAC-1  | GSM4626768 | Normal |
| GSM4626768_AAACGGGAGGACTGGT-1  | GSM4626768 | Normal |
| GSM4626768_AAACGGGAGGCATTGG-1  | GSM4626768 | Normal |
| GSM4626768_AAACGGGCAAGTAGTA-1  | GSM4626768 | Normal |
| GSM4626768_AAACGGGCAGATGGCA-1  | GSM4626768 | Normal |
| GSM4626768_AAACGGGCAGCGTCCA-1  | GSM4626768 | Normal |
| GSM4626768_AAACGGGCAGGACGTA-1  | GSM4626768 | Normal |
| GSM4626768_AAACGGGGTAATCACC-1  | GSM4626768 | Normal |
| GSM4626768_AAACGGGGTCCGAACC-1  | GSM4626768 | Normal |
| GSM4626768_AAACGGGGTTCTCATT-1  | GSM4626768 | Normal |
| GSM4626768_AAACGGGGTTGTCTTT-1  | GSM4626768 | Normal |
| GSM4626768_AAACGGGTCTCCGGTT-1  | GSM4626768 | Normal |
| GSM4626768_AAAGATGAGAGCTGCA-1  | GSM4626768 | Normal |
| GSM4626768_AAAGATGAGCTAGTGG-1  | GSM4626768 | Normal |
| GSM4626768_AAAGATGAGCTAGTTC-1  | GSM4626768 | Normal |
| GSM4626768_AAAGATGAGGGATGGG-1  | GSM4626768 | Normal |
| GSM4626768_AAAGATGCAGCAGTTT-1  | GSM4626768 | Normal |
| GSM4626768_AAAGATGCATGCTAGT-1  | GSM4626768 | Normal |
| GSM4626768_AAAGATGGTCAGAAGC-1  | GSM4626768 | Normal |
| GSM4626768_AAAGATGGTTACGTCA-1  | GSM4626768 | Normal |
| GSM4626768_AAAGATGTCACGGTTA-1  | GSM4626768 | Normal |
| GSM4626768_AAAGATGTCAGCTCGG-1  | GSM4626768 | Normal |
| GSM4626768_AAAGATGTCCTTCAAT-1  | GSM4626768 | Normal |
| GSM4626768_AAAGCAAAGCTGCAAG-1  | GSM4626768 | Normal |
| GSM4626768_AAAGCAACAAGTAATG-1  | GSM4626768 | Normal |
| GSM4626768_AAAGCAACACAGACTT-1  | GSM4626768 | Normal |
| GSM4626768_AAAGCAACACTACAGT-1  | GSM4626768 | Normal |
| GSM4626768_AAAGCAACAGATAATG-1  | GSM4626768 | Normal |
| GSM4626768_AAAGCAACATCCGCGA-1  | GSM4626768 | Normal |
| GSM4626768_AAAGCAAGTCTCCCTA-1  | GSM4626768 | Normal |
| GSM4626768_AAAGCAAGTGACTACT-1  | GSM4626768 | Normal |
| GSM4626768_AAAGCAAGTGTGAAAT-1  | GSM4626768 | Normal |
| GSM4626768_AAAGCAATCCATGAGT-1  | GSM4626768 | Normal |
| GSM4626768_AAAGTAGAGATCACGG-1  | GSM4626768 | Normal |
| GSM4626768_AAAGTAGAGGAGCGAG-1  | GSM4626768 | Normal |
| GSM4626768_AAAGTAGAGTACGTTC-1  | GSM4626768 | Normal |
| GSM4626768_AAAGTAGAGTGGGATC-1  | GSM4626768 | Normal |
| GSM4626768_AAAGTAGAGTTGAGTA-1  | GSM4626768 | Normal |
| GSM4626768_AAAGTAGCAAGCTGGA-1  | GSM4626768 | Normal |
| GSM4626768_AAAGTAGCACAACGTT-1  | GSM4626768 | Normal |
| GSM4626768_AAAGTAGCATTCTCAT-1  | GSM4626768 | Normal |
| GSM4626768_AAAGTAGGTAGCGCAA-1  | GSM4626768 | Normal |
| GSM4626768_AAAGTAGGTATGAATG-1  | GSM4626768 | Normal |
| GSM4626768_AAAGTAGGTTAAGACA-1  | GSM4626768 | Normal |
| GSM4626768_AAAGTAGGTTCCGCGAC-1 | GSM4626768 | Normal |
| GSM4626768_AAAGTAGTCTGCAAGT-1  | GSM4626768 | Normal |

|                                |            |        |
|--------------------------------|------------|--------|
| GSM4626768_AAATGCCAGCACGCCT-1  | GSM4626768 | Normal |
| GSM4626768_AAATGCCAGCGATTCT-1  | GSM4626768 | Normal |
| GSM4626768_AAATGCCAGCTAACAA-1  | GSM4626768 | Normal |
| GSM4626768_AAATGCCAGGATGGTC-1  | GSM4626768 | Normal |
| GSM4626768_AAATGCCAGGTGCAAC-1  | GSM4626768 | Normal |
| GSM4626768_AAATGCCCAAACAACA-1  | GSM4626768 | Normal |
| GSM4626768_AAATGCCACAGGCCT-1   | GSM4626768 | Normal |
| GSM4626768_AAATGCCACCGCTAG-1   | GSM4626768 | Normal |
| GSM4626768_AAATGCCCATATACCG-1  | GSM4626768 | Normal |
| GSM4626768_AAATGCCGTCGCATAT-1  | GSM4626768 | Normal |
| GSM4626768_AAATGCCGTGAAAGA-1   | GSM4626768 | Normal |
| GSM4626768_AAATGCCTCAGTTTGG-1  | GSM4626768 | Normal |
| GSM4626768_AAATGCCTCCATTAT-1   | GSM4626768 | Normal |
| GSM4626768_AAATGCCTCTCCCTGA-1  | GSM4626768 | Normal |
| GSM4626768_AACACGTAGAGCTATA-1  | GSM4626768 | Normal |
| GSM4626768_AACACGTAGAGTAAGG-1  | GSM4626768 | Normal |
| GSM4626768_AACACGTGTGCTGTAT-1  | GSM4626768 | Normal |
| GSM4626768_AACACGTTTCGGCGCAT-1 | GSM4626768 | Normal |
| GSM4626768_AACCATGAGAAACGCC-1  | GSM4626768 | Normal |
| GSM4626768_AACCATGAGACCACGA-1  | GSM4626768 | Normal |
| GSM4626768_AACCATGAGGTCATCT-1  | GSM4626768 | Normal |
| GSM4626768_AACCATGCATTTCAGG-1  | GSM4626768 | Normal |
| GSM4626768_AACCATGGTCAAGCGA-1  | GSM4626768 | Normal |
| GSM4626768_AACCATGGTCAGGACA-1  | GSM4626768 | Normal |
| GSM4626768_AACCATGGTCCATCCT-1  | GSM4626768 | Normal |
| GSM4626768_AACCATGGTGTTGGGA-1  | GSM4626768 | Normal |
| GSM4626768_AACCATGGTTGCCTCT-1  | GSM4626768 | Normal |
| GSM4626768_AACCATGTCGTCGTTT-1  | GSM4626768 | Normal |
| GSM4626768_AACCATGTCTCCCTGA-1  | GSM4626768 | Normal |
| GSM4626768_AACCATGTCTGCCCTA-1  | GSM4626768 | Normal |
| GSM4626768_AACCGCGAGGATGGAA-1  | GSM4626768 | Normal |
| GSM4626768_AACCGCGAGGGATCTG-1  | GSM4626768 | Normal |
| GSM4626768_AACCGCGAGGGCTTGA-1  | GSM4626768 | Normal |
| GSM4626768_AACCGCGAGTAGCCGA-1  | GSM4626768 | Normal |
| GSM4626768_AACCGCGCAAAGCGGT-1  | GSM4626768 | Normal |
| GSM4626768_AACCGCGCAGGGTACA-1  | GSM4626768 | Normal |
| GSM4626768_AACCGCGCATAACAGCT-1 | GSM4626768 | Normal |
| GSM4626768_AACCGCGGTAACAGCT-1  | GSM4626768 | Normal |
| GSM4626768_AACCGCGTCAACACGT-1  | GSM4626768 | Normal |
| GSM4626768_AACCGCGTCAACACTG-1  | GSM4626768 | Normal |
| GSM4626768_AACCGCGTCATCACCC-1  | GSM4626768 | Normal |
| GSM4626768_AACCGCGTCCACGTGG-1  | GSM4626768 | Normal |
| GSM4626768_AACCGCGTCCGTAGTA-1  | GSM4626768 | Normal |
| GSM4626768_AACCGCGTCCTAGGGC-1  | GSM4626768 | Normal |
| GSM4626768_AACCGCGTCTGCCCTA-1  | GSM4626768 | Normal |
| GSM4626768_AACGTTGAGGGTGTGT-1  | GSM4626768 | Normal |
| GSM4626768_AACGTTGCACATCTTT-1  | GSM4626768 | Normal |
| GSM4626768_AACGTTGCACCACAG-1   | GSM4626768 | Normal |
| GSM4626768_AACGTTGCAGACGTAG-1  | GSM4626768 | Normal |
| GSM4626768_AACGTTGGTCTAGCGC-1  | GSM4626768 | Normal |
| GSM4626768_AACGTTGTCCGATATG-1  | GSM4626768 | Normal |
| GSM4626768_AACGTTGTTCGCATGGC-1 | GSM4626768 | Normal |
| GSM4626768_AACTCAGAGAGATGAG-1  | GSM4626768 | Normal |
| GSM4626768_AACTCAGAGATCGATA-1  | GSM4626768 | Normal |
| GSM4626768_AACTCAGAGGAGTACC-1  | GSM4626768 | Normal |
| GSM4626768_AACTCAGAGTGCGTGA-1  | GSM4626768 | Normal |
| GSM4626768_AACTCAGAGTGGACA-1   | GSM4626768 | Normal |

|                                |            |        |
|--------------------------------|------------|--------|
| GSM4626768_AACTCAGCAAAGAATC-1  | GSM4626768 | Normal |
| GSM4626768_AACTCAGCAAGTTAAG-1  | GSM4626768 | Normal |
| GSM4626768_AACTCAGCATTTCGACA-1 | GSM4626768 | Normal |
| GSM4626768_AACTCAGGTATCTGCA-1  | GSM4626768 | Normal |
| GSM4626768_AACTCAGGTTGAGTTC-1  | GSM4626768 | Normal |
| GSM4626768_AACTCAGTCTCGCTTG-1  | GSM4626768 | Normal |
| GSM4626768_AACTCCCAGAAGGTTT-1  | GSM4626768 | Normal |
| GSM4626768_AACTCCCAGAGCAATT-1  | GSM4626768 | Normal |
| GSM4626768_AACTCCCAGCGATGAC-1  | GSM4626768 | Normal |
| GSM4626768_AACTCCCCAAGCCTAT-1  | GSM4626768 | Normal |
| GSM4626768_AACTCCCCACCGATAT-1  | GSM4626768 | Normal |
| GSM4626768_AACTCCCGTAGGCTGA-1  | GSM4626768 | Normal |
| GSM4626768_AACTCCCGTCTAGTGT-1  | GSM4626768 | Normal |
| GSM4626768_AACTCCCGTTGATTGC-1  | GSM4626768 | Normal |
| GSM4626768_AACTCCCTCCGCGCAA-1  | GSM4626768 | Normal |
| GSM4626768_AACTCCCTCTCGTTTA-1  | GSM4626768 | Normal |
| GSM4626768_AACTCTTAGCGCTTAT-1  | GSM4626768 | Normal |
| GSM4626768_AACTCTTGTAGGAGTC-1  | GSM4626768 | Normal |
| GSM4626768_AACTCTTGTTCCATGA-1  | GSM4626768 | Normal |
| GSM4626768_AACTCTTTCACATAGC-1  | GSM4626768 | Normal |
| GSM4626768_AACTCTTTCAGAAAGG-1  | GSM4626768 | Normal |
| GSM4626768_AACTCTTTCGAATGCT-1  | GSM4626768 | Normal |
| GSM4626768_AACTCTTCTGGCGTG-1   | GSM4626768 | Normal |
| GSM4626768_AACTGGTAGCGATGAC-1  | GSM4626768 | Normal |
| GSM4626768_AACTGGTAGTCACGCC-1  | GSM4626768 | Normal |
| GSM4626768_AACTGGTCACACTGCG-1  | GSM4626768 | Normal |
| GSM4626768_AACTGGTCATTCTTAC-1  | GSM4626768 | Normal |
| GSM4626768_AACTGGTGTAGAAGGA-1  | GSM4626768 | Normal |
| GSM4626768_AACTGGTGTTCAACCA-1  | GSM4626768 | Normal |
| GSM4626768_AACTGGTTCATAAAGG-1  | GSM4626768 | Normal |
| GSM4626768_AACTGGTTCACTCCTG-1  | GSM4626768 | Normal |
| GSM4626768_AACTGGTTCCTTACAC-1  | GSM4626768 | Normal |
| GSM4626768_AACTTTCAGATGGGTC-1  | GSM4626768 | Normal |
| GSM4626768_AACTTTCAGCAGCCTC-1  | GSM4626768 | Normal |
| GSM4626768_AACTTTCAGCATGGCA-1  | GSM4626768 | Normal |
| GSM4626768_AACTTTCAGTATCTCG-1  | GSM4626768 | Normal |
| GSM4626768_AACTTTCAGTGGTAGC-1  | GSM4626768 | Normal |
| GSM4626768_AACTTTCGAATAGCGG-1  | GSM4626768 | Normal |
| GSM4626768_AACTTTCACCGGAAA-1   | GSM4626768 | Normal |
| GSM4626768_AACTTTCATGCAACT-1   | GSM4626768 | Normal |
| GSM4626768_AACTTTCGTACCCAAT-1  | GSM4626768 | Normal |
| GSM4626768_AACTTTCGTACTTCTT-1  | GSM4626768 | Normal |
| GSM4626768_AACTTTCGTGGACGAT-1  | GSM4626768 | Normal |
| GSM4626768_AACTTTCGTTGGTGGA-1  | GSM4626768 | Normal |
| GSM4626768_AACTTTCCTACTGGGC-1  | GSM4626768 | Normal |
| GSM4626768_AACTTTCCTCAGCACAT-1 | GSM4626768 | Normal |
| GSM4626768_AACTTTCCTCATATCGG-1 | GSM4626768 | Normal |
| GSM4626768_AACTTTCCTCATATTC-1  | GSM4626768 | Normal |
| GSM4626768_AAGACCTAGCGCCTCA-1  | GSM4626768 | Normal |
| GSM4626768_AAGACCTAGTACGACG-1  | GSM4626768 | Normal |
| GSM4626768_AAGACCTAGTTAAGTG-1  | GSM4626768 | Normal |
| GSM4626768_AAGACCTAGTTCCACA-1  | GSM4626768 | Normal |
| GSM4626768_AAGACCTCAACTTGAC-1  | GSM4626768 | Normal |
| GSM4626768_AAGACCTCATGGAATA-1  | GSM4626768 | Normal |
| GSM4626768_AAGACCTGTAAGAGGA-1  | GSM4626768 | Normal |
| GSM4626768_AAGACCTGTCGCGGTT-1  | GSM4626768 | Normal |
| GSM4626768_AAGACCTTCCTTGCCA-1  | GSM4626768 | Normal |

|                                |            |        |
|--------------------------------|------------|--------|
| GSM4626768_AAGACCTTCGTATCAG-1  | GSM4626768 | Normal |
| GSM4626768_AAGACCTTCGTGGGAA-1  | GSM4626768 | Normal |
| GSM4626768_AAGACCTTCTCCGGTT-1  | GSM4626768 | Normal |
| GSM4626768_AAGCCGCAGATCGGGT-1  | GSM4626768 | Normal |
| GSM4626768_AAGCCGCAGCACACAG-1  | GSM4626768 | Normal |
| GSM4626768_AAGCCGCAGCTTATCG-1  | GSM4626768 | Normal |
| GSM4626768_AAGCCGCCAACTGCTA-1  | GSM4626768 | Normal |
| GSM4626768_AAGCCGCCACGGTGTC-1  | GSM4626768 | Normal |
| GSM4626768_AAGCCGCCATCATCCC-1  | GSM4626768 | Normal |
| GSM4626768_AAGCCGCGTCAAGCGA-1  | GSM4626768 | Normal |
| GSM4626768_AAGCCGCGTCAACAG-1   | GSM4626768 | Normal |
| GSM4626768_AAGCCGCGTGGGTATG-1  | GSM4626768 | Normal |
| GSM4626768_AAGCCGCTCCTGTAGA-1  | GSM4626768 | Normal |
| GSM4626768_AAGCCGCTCTTGTTTG-1  | GSM4626768 | Normal |
| GSM4626768_AAGGAGCAGGGTCTCC-1  | GSM4626768 | Normal |
| GSM4626768_AAGGAGCAGGTTACCT-1  | GSM4626768 | Normal |
| GSM4626768_AAGGAGCAGTCTCAAC-1  | GSM4626768 | Normal |
| GSM4626768_AAGGAGCCACAGACTT-1  | GSM4626768 | Normal |
| GSM4626768_AAGGAGCGTACTTGAC-1  | GSM4626768 | Normal |
| GSM4626768_AAGGAGCGTCCATGAT-1  | GSM4626768 | Normal |
| GSM4626768_AAGGAGCGTTATCGGT-1  | GSM4626768 | Normal |
| GSM4626768_AAGGAGCTCTCAAGTG-1  | GSM4626768 | Normal |
| GSM4626768_AAGGAGCTCTGTCTCG-1  | GSM4626768 | Normal |
| GSM4626768_AAGGCAGAGTTACGGG-1  | GSM4626768 | Normal |
| GSM4626768_AAGGCAGCAAGTTCTG-1  | GSM4626768 | Normal |
| GSM4626768_AAGGCAGCATTTCACT-1  | GSM4626768 | Normal |
| GSM4626768_AAGGCAGGTAGGACAC-1  | GSM4626768 | Normal |
| GSM4626768_AAGGCAGGTCTCATCC-1  | GSM4626768 | Normal |
| GSM4626768_AAGGCAGGTGCACTTA-1  | GSM4626768 | Normal |
| GSM4626768_AAGGCAGTCAACCCTCA-1 | GSM4626768 | Normal |
| GSM4626768_AAGGCAGTCCACGAAT-1  | GSM4626768 | Normal |
| GSM4626768_AAGGCAGTCTGTCTAT-1  | GSM4626768 | Normal |
| GSM4626768_AAGGCAGTCTTAACCT-1  | GSM4626768 | Normal |
| GSM4626768_AAGGTTCCAGAGTGACC-1 | GSM4626768 | Normal |
| GSM4626768_AAGGTTCCAGATAGGAG-1 | GSM4626768 | Normal |
| GSM4626768_AAGGTTCCAACACGCC-1  | GSM4626768 | Normal |
| GSM4626768_AAGGTTCCATACCATG-1  | GSM4626768 | Normal |
| GSM4626768_AAGGTTCTCGTTTAGG-1  | GSM4626768 | Normal |
| GSM4626768_AAGGTTCTCTAGAGTC-1  | GSM4626768 | Normal |
| GSM4626768_AAGTCTGAGATCGATA-1  | GSM4626768 | Normal |
| GSM4626768_AAGTCTGAGTATGACA-1  | GSM4626768 | Normal |
| GSM4626768_AAGTCTGCAAGCTGTT-1  | GSM4626768 | Normal |
| GSM4626768_AAGTCTGCACAGACTT-1  | GSM4626768 | Normal |
| GSM4626768_AAGTCTGGTCTAGGTT-1  | GSM4626768 | Normal |
| GSM4626768_AAGTCTGGTGCTGTAT-1  | GSM4626768 | Normal |
| GSM4626768_AAGTCTGGTTCAATC-1   | GSM4626768 | Normal |
| GSM4626768_AATCCAGAGAGCTATA-1  | GSM4626768 | Normal |
| GSM4626768_AATCCAGAGCAGGCTA-1  | GSM4626768 | Normal |
| GSM4626768_AATCCAGAGGACACCA-1  | GSM4626768 | Normal |
| GSM4626768_AATCCAGAGTTAACGA-1  | GSM4626768 | Normal |
| GSM4626768_AATCCAGCAAATACAG-1  | GSM4626768 | Normal |
| GSM4626768_AATCCAGCATGGGACA-1  | GSM4626768 | Normal |
| GSM4626768_AATCCAGGTCACAAGG-1  | GSM4626768 | Normal |
| GSM4626768_AATCCAGGTGTGAAAT-1  | GSM4626768 | Normal |
| GSM4626768_AATCCAGGTTCCAGCGC-1 | GSM4626768 | Normal |
| GSM4626768_AATCCGGTAGCTCTCGG-1 | GSM4626768 | Normal |
| GSM4626768_AATCCGGTAGGCAGGTT-1 | GSM4626768 | Normal |

|                                |            |        |
|--------------------------------|------------|--------|
| GSM4626768_AATCGGTAGTAAGTAC-1  | GSM4626768 | Normal |
| GSM4626768_AATCGGTCAGCCTTTC-1  | GSM4626768 | Normal |
| GSM4626768_AATCGGTCATGCTAGT-1  | GSM4626768 | Normal |
| GSM4626768_AATCGGTGTACTTCTT-1  | GSM4626768 | Normal |
| GSM4626768_AATCGGTTCACTTACT-1  | GSM4626768 | Normal |
| GSM4626768_AATCGGTTCCAGGATCT-1 | GSM4626768 | Normal |
| GSM4626768_AATCGGTTCCATGTGGT-1 | GSM4626768 | Normal |
| GSM4626768_AATCGGTTCCAGATCA-1  | GSM4626768 | Normal |
| GSM4626768_AATCGGTTCTTGCCGT-1  | GSM4626768 | Normal |
| GSM4626768_ACACCAAAGACCGGAT-1  | GSM4626768 | Normal |
| GSM4626768_ACACCAAAGCCTATGT-1  | GSM4626768 | Normal |
| GSM4626768_ACACCAAAGCTGTCTA-1  | GSM4626768 | Normal |
| GSM4626768_ACACCAACACCACGTG-1  | GSM4626768 | Normal |
| GSM4626768_ACACCAAGTAACGACG-1  | GSM4626768 | Normal |
| GSM4626768_ACACCAAGTACTCGCG-1  | GSM4626768 | Normal |
| GSM4626768_ACACCAAGTCATTAGC-1  | GSM4626768 | Normal |
| GSM4626768_ACACCAAGTGGGTCAA-1  | GSM4626768 | Normal |
| GSM4626768_ACACCAAGTTCTGTTT-1  | GSM4626768 | Normal |
| GSM4626768_ACACCCTAGAATTCCC-1  | GSM4626768 | Normal |
| GSM4626768_ACACCCTAGCACGCCT-1  | GSM4626768 | Normal |
| GSM4626768_ACACCCTCAGTGGAGT-1  | GSM4626768 | Normal |
| GSM4626768_ACACCCTGTAATCGTC-1  | GSM4626768 | Normal |
| GSM4626768_ACACCCTGTCCAGTTA-1  | GSM4626768 | Normal |
| GSM4626768_ACACCCTGTGCGCTTG-1  | GSM4626768 | Normal |
| GSM4626768_ACACCCTGTTTGTGTG-1  | GSM4626768 | Normal |
| GSM4626768_ACACCCTTCAATCTCT-1  | GSM4626768 | Normal |
| GSM4626768_ACACCCTTCCAAACAC-1  | GSM4626768 | Normal |
| GSM4626768_ACACCCTTCGCGGATC-1  | GSM4626768 | Normal |
| GSM4626768_ACACCCTTCGTAGATC-1  | GSM4626768 | Normal |
| GSM4626768_ACACCCTTCTGCTGTC-1  | GSM4626768 | Normal |
| GSM4626768_ACACCGGAGAGTGACC-1  | GSM4626768 | Normal |
| GSM4626768_ACACCGGCAAACAACA-1  | GSM4626768 | Normal |
| GSM4626768_ACACCGGCACACTGCG-1  | GSM4626768 | Normal |
| GSM4626768_ACACCGGCAGGCGATA-1  | GSM4626768 | Normal |
| GSM4626768_ACACCGGCAGTTCATG-1  | GSM4626768 | Normal |
| GSM4626768_ACACCGGGTAAGTAGT-1  | GSM4626768 | Normal |
| GSM4626768_ACACCGGGTACAGCAG-1  | GSM4626768 | Normal |
| GSM4626768_ACACCGGGTAGCGTGA-1  | GSM4626768 | Normal |
| GSM4626768_ACACCGGGTCGATTGT-1  | GSM4626768 | Normal |
| GSM4626768_ACACCGGTCACGGTTA-1  | GSM4626768 | Normal |
| GSM4626768_ACACCGGTCACTTATC-1  | GSM4626768 | Normal |
| GSM4626768_ACACCGGTCATTGCC-1   | GSM4626768 | Normal |
| GSM4626768_ACACCGGTCCTCTAGC-1  | GSM4626768 | Normal |
| GSM4626768_ACACCGGTCTGGTGTA-1  | GSM4626768 | Normal |
| GSM4626768_ACACTGAAGAGACGAA-1  | GSM4626768 | Normal |
| GSM4626768_ACACTGAAGCAAATCA-1  | GSM4626768 | Normal |
| GSM4626768_ACACTGACAAACAACA-1  | GSM4626768 | Normal |
| GSM4626768_ACACTGACAACAACCT-1  | GSM4626768 | Normal |
| GSM4626768_ACACTGACAACCTGGCC-1 | GSM4626768 | Normal |
| GSM4626768_ACACTGACACCGTTGG-1  | GSM4626768 | Normal |
| GSM4626768_ACACTGACACTAGTAC-1  | GSM4626768 | Normal |
| GSM4626768_ACACTGAGTAGCGTGA-1  | GSM4626768 | Normal |
| GSM4626768_ACACTGAGTATCAGTC-1  | GSM4626768 | Normal |
| GSM4626768_ACACTGAGTGACAAAT-1  | GSM4626768 | Normal |
| GSM4626768_ACACTGAGTGTCTTT-1   | GSM4626768 | Normal |
| GSM4626768_ACACTGATCAAGGCTT-1  | GSM4626768 | Normal |
| GSM4626768_ACACTGATCCTCAACC-1  | GSM4626768 | Normal |



|                                |            |        |
|--------------------------------|------------|--------|
| GSM4626768_ACACTGATCTGGCGAC-1  | GSM4626768 | Normal |
| GSM4626768_ACACTGATCTTGCCGT-1  | GSM4626768 | Normal |
| GSM4626768_ACAGCCGAGCGATCCC-1  | GSM4626768 | Normal |
| GSM4626768_ACAGCCGAGCTAACTC-1  | GSM4626768 | Normal |
| GSM4626768_ACAGCCGCAGACAAAT-1  | GSM4626768 | Normal |
| GSM4626768_ACAGCCGCAGACACTT-1  | GSM4626768 | Normal |
| GSM4626768_ACAGCCGGTACTCAAC-1  | GSM4626768 | Normal |
| GSM4626768_ACAGCCGGTTATCACG-1  | GSM4626768 | Normal |
| GSM4626768_ACAGCCGGTTTCCACC-1  | GSM4626768 | Normal |
| GSM4626768_ACAGCCGTCTGTCTAT-1  | GSM4626768 | Normal |
| GSM4626768_ACAGCTAAGAAGGACA-1  | GSM4626768 | Normal |
| GSM4626768_ACAGCTAAGCGGATCA-1  | GSM4626768 | Normal |
| GSM4626768_ACAGCTACACGGTTTA-1  | GSM4626768 | Normal |
| GSM4626768_ACAGCTACAGCTCGCA-1  | GSM4626768 | Normal |
| GSM4626768_ACAGCTAGTATTCGTG-1  | GSM4626768 | Normal |
| GSM4626768_ACAGCTAGTCTCACCT-1  | GSM4626768 | Normal |
| GSM4626768_ACAGCTATCATTCACT-1  | GSM4626768 | Normal |
| GSM4626768_ACAGCTATCCACGAAT-1  | GSM4626768 | Normal |
| GSM4626768_ACAGCTATCTGCTTGC-1  | GSM4626768 | Normal |
| GSM4626768_ACATACGAGGACCACA-1  | GSM4626768 | Normal |
| GSM4626768_ACATACGCAAGAGTCG-1  | GSM4626768 | Normal |
| GSM4626768_ACATACGCAAGCGAGT-1  | GSM4626768 | Normal |
| GSM4626768_ACATACGCAAGGTTCT-1  | GSM4626768 | Normal |
| GSM4626768_ACATACGCACAAGCCC-1  | GSM4626768 | Normal |
| GSM4626768_ACATACGCATCGGACC-1  | GSM4626768 | Normal |
| GSM4626768_ACATACGGTAGCGCAA-1  | GSM4626768 | Normal |
| GSM4626768_ACATACGGTTGATTTCG-1 | GSM4626768 | Normal |
| GSM4626768_ACATCAGAGAGGTAGA-1  | GSM4626768 | Normal |
| GSM4626768_ACATCAGAGAGTAAGG-1  | GSM4626768 | Normal |
| GSM4626768_ACATCAGAGCCAACAG-1  | GSM4626768 | Normal |
| GSM4626768_ACATCAGAGGCGATAC-1  | GSM4626768 | Normal |
| GSM4626768_ACATCAGAGTCCATAC-1  | GSM4626768 | Normal |
| GSM4626768_ACATCAGAGTGCGTGA-1  | GSM4626768 | Normal |
| GSM4626768_ACATCAGCACGAAGCA-1  | GSM4626768 | Normal |
| GSM4626768_ACATCAGCACGAGGTA-1  | GSM4626768 | Normal |
| GSM4626768_ACATCAGCATTGCTT-1   | GSM4626768 | Normal |
| GSM4626768_ACATCAGGTACGCTGC-1  | GSM4626768 | Normal |
| GSM4626768_ACATCAGGTGCGATAG-1  | GSM4626768 | Normal |
| GSM4626768_ACATCAGTCAACGAAA-1  | GSM4626768 | Normal |
| GSM4626768_ACATGGTAGAAACCAT-1  | GSM4626768 | Normal |
| GSM4626768_ACATGGTAGCAGACTG-1  | GSM4626768 | Normal |
| GSM4626768_ACATGGTAGTCAATAG-1  | GSM4626768 | Normal |
| GSM4626768_ACATGGTCAAAGAATC-1  | GSM4626768 | Normal |
| GSM4626768_ACATGGTCAGACACTT-1  | GSM4626768 | Normal |
| GSM4626768_ACATGGTCAGTCTTCC-1  | GSM4626768 | Normal |
| GSM4626768_ACATGGTCATCAGTCA-1  | GSM4626768 | Normal |
| GSM4626768_ACATGGTCATGGTCTA-1  | GSM4626768 | Normal |
| GSM4626768_ACATGGTGTACCATCA-1  | GSM4626768 | Normal |
| GSM4626768_ACATGGTGTGGCCCTA-1  | GSM4626768 | Normal |
| GSM4626768_ACATGGTTCATATCGG-1  | GSM4626768 | Normal |
| GSM4626768_ACATGGTTCCTTGCAAT-1 | GSM4626768 | Normal |
| GSM4626768_ACCAGTAAGACTTTTCG-1 | GSM4626768 | Normal |
| GSM4626768_ACCAGTAAGTGCTGCC-1  | GSM4626768 | Normal |
| GSM4626768_ACCAGTACACTCTGTC-1  | GSM4626768 | Normal |
| GSM4626768_ACCAGTACATGCGCAC-1  | GSM4626768 | Normal |
| GSM4626768_ACCAGTACATTGGGCC-1  | GSM4626768 | Normal |
| GSM4626768_ACCAGTAGTACCGTTA-1  | GSM4626768 | Normal |

|                                |            |        |
|--------------------------------|------------|--------|
| GSM4626768_ACCAGTATCAGTTCGA-1  | GSM4626768 | Normal |
| GSM4626768_ACCCACTAGCACCGCT-1  | GSM4626768 | Normal |
| GSM4626768_ACCCACTAGCGCCTTG-1  | GSM4626768 | Normal |
| GSM4626768_ACCCACTCAACGCACC-1  | GSM4626768 | Normal |
| GSM4626768_ACCCACTCACGTGAGA-1  | GSM4626768 | Normal |
| GSM4626768_ACCCACTCATATACCG-1  | GSM4626768 | Normal |
| GSM4626768_ACCCACTCATGGATGG-1  | GSM4626768 | Normal |
| GSM4626768_ACCCACTGTCAACTGT-1  | GSM4626768 | Normal |
| GSM4626768_ACCCACTGTGGACGAT-1  | GSM4626768 | Normal |
| GSM4626768_ACCCACTTACAATGC-1   | GSM4626768 | Normal |
| GSM4626768_ACCCACTTCCGAGCCA-1  | GSM4626768 | Normal |
| GSM4626768_ACGTAAAGACACGAC-1   | GSM4626768 | Normal |
| GSM4626768_ACGTAAAGCTACCTA-1   | GSM4626768 | Normal |
| GSM4626768_ACGTAAAGTTAGCGG-1   | GSM4626768 | Normal |
| GSM4626768_ACGTAAACACGAAACG-1  | GSM4626768 | Normal |
| GSM4626768_ACGTAAACAGGATTGG-1  | GSM4626768 | Normal |
| GSM4626768_ACGTAAACATGCCTAA-1  | GSM4626768 | Normal |
| GSM4626768_ACGTAAAGTACAGACG-1  | GSM4626768 | Normal |
| GSM4626768_ACGTAAAGTATCAGTC-1  | GSM4626768 | Normal |
| GSM4626768_ACGTAAAGTTAAGACA-1  | GSM4626768 | Normal |
| GSM4626768_ACGTAAAGTTATGTGC-1  | GSM4626768 | Normal |
| GSM4626768_ACGTAAAGTTGGAGGT-1  | GSM4626768 | Normal |
| GSM4626768_ACGTAAATCCGTACAA-1  | GSM4626768 | Normal |
| GSM4626768_ACCTTTAAGAGAGCTC-1  | GSM4626768 | Normal |
| GSM4626768_ACCTTTAAGCACGCCT-1  | GSM4626768 | Normal |
| GSM4626768_ACCTTTAAGGATCGCA-1  | GSM4626768 | Normal |
| GSM4626768_ACCTTTAAGTCCAGGA-1  | GSM4626768 | Normal |
| GSM4626768_ACCTTTACAAGGACTG-1  | GSM4626768 | Normal |
| GSM4626768_ACCTTTACACAGAGGT-1  | GSM4626768 | Normal |
| GSM4626768_ACCTTTAGTTGTTTGG-1  | GSM4626768 | Normal |
| GSM4626768_ACCTTTATCAGAGACG-1  | GSM4626768 | Normal |
| GSM4626768_ACCTTTATCGGCGCTA-1  | GSM4626768 | Normal |
| GSM4626768_ACCTTTATCGGTTCCGG-1 | GSM4626768 | Normal |
| GSM4626768_ACGAGCCCAGCGAACA-1  | GSM4626768 | Normal |
| GSM4626768_ACGAGCCGTTACCAGT-1  | GSM4626768 | Normal |
| GSM4626768_ACGAGCCGTTTGTGG-1   | GSM4626768 | Normal |
| GSM4626768_ACGAGCCTCAGTTTGG-1  | GSM4626768 | Normal |
| GSM4626768_ACGAGCCTCGTATCAG-1  | GSM4626768 | Normal |
| GSM4626768_ACGAGCCTCTTCAACT-1  | GSM4626768 | Normal |
| GSM4626768_ACGAGGAAGAGGGATA-1  | GSM4626768 | Normal |
| GSM4626768_ACGAGGAAGAGGTTAT-1  | GSM4626768 | Normal |
| GSM4626768_ACGAGGAAGCGCCTCA-1  | GSM4626768 | Normal |
| GSM4626768_ACGAGGACACGTAAG-1   | GSM4626768 | Normal |
| GSM4626768_ACGAGGACATGTCCTC-1  | GSM4626768 | Normal |
| GSM4626768_ACGAGGAGTAAGTGTA-1  | GSM4626768 | Normal |
| GSM4626768_ACGAGGAGTACACCGC-1  | GSM4626768 | Normal |
| GSM4626768_ACGAGGAGTATAGGTA-1  | GSM4626768 | Normal |
| GSM4626768_ACGAGGATCCGCGTTT-1  | GSM4626768 | Normal |
| GSM4626768_ACGAGGATCTACTCAT-1  | GSM4626768 | Normal |
| GSM4626768_ACGATACAGAGAACAG-1  | GSM4626768 | Normal |
| GSM4626768_ACGATACAGGCATGTG-1  | GSM4626768 | Normal |
| GSM4626768_ACGATACGTTGGACCC-1  | GSM4626768 | Normal |
| GSM4626768_ACGATACTCACCATAG-1  | GSM4626768 | Normal |
| GSM4626768_ACGATACTCATCGATG-1  | GSM4626768 | Normal |
| GSM4626768_ACGATGTAGACTGGGT-1  | GSM4626768 | Normal |
| GSM4626768_ACGATGTAGCCTCGTG-1  | GSM4626768 | Normal |
| GSM4626768_ACGATGTAGGCACATG-1  | GSM4626768 | Normal |

|                                |            |        |
|--------------------------------|------------|--------|
| GSM4626768_ACGATGTAGTAACCCT-1  | GSM4626768 | Normal |
| GSM4626768_ACGATGTCACGACGAA-1  | GSM4626768 | Normal |
| GSM4626768_ACGATGTCAGCGTCCA-1  | GSM4626768 | Normal |
| GSM4626768_ACGATGTGTTTCAGGCC-1 | GSM4626768 | Normal |
| GSM4626768_ACGATGTGTTTCGGGCT-1 | GSM4626768 | Normal |
| GSM4626768_ACGATGTTCCACCACCT-1 | GSM4626768 | Normal |
| GSM4626768_ACGATGTTTCAGTGCAT-1 | GSM4626768 | Normal |
| GSM4626768_ACGATGTTTCATGCATG-1 | GSM4626768 | Normal |
| GSM4626768_ACGCAGCCAAGCCCAC-1  | GSM4626768 | Normal |
| GSM4626768_ACGCAGCCAAGTCTAC-1  | GSM4626768 | Normal |
| GSM4626768_ACGCAGCCATTCTCAT-1  | GSM4626768 | Normal |
| GSM4626768_ACGCAGCGTCAGGACA-1  | GSM4626768 | Normal |
| GSM4626768_ACGCAGCGTCGTTGTA-1  | GSM4626768 | Normal |
| GSM4626768_ACGCAGCGTGACCAAG-1  | GSM4626768 | Normal |
| GSM4626768_ACGCAGCGTGCGGTAA-1  | GSM4626768 | Normal |
| GSM4626768_ACGCAGCGTTCAGGCC-1  | GSM4626768 | Normal |
| GSM4626768_ACGCAGCTCAGCTCGG-1  | GSM4626768 | Normal |
| GSM4626768_ACGCAGCTCGTATCAG-1  | GSM4626768 | Normal |
| GSM4626768_ACGCAGCTCTCTAAGG-1  | GSM4626768 | Normal |
| GSM4626768_ACGCCAGAGATCCCAT-1  | GSM4626768 | Normal |
| GSM4626768_ACGCCAGAGATGTTAG-1  | GSM4626768 | Normal |
| GSM4626768_ACGCCAGCACCGGAAA-1  | GSM4626768 | Normal |
| GSM4626768_ACGCCAGCACGCGAAA-1  | GSM4626768 | Normal |
| GSM4626768_ACGCCAGCATGCTAGT-1  | GSM4626768 | Normal |
| GSM4626768_ACGCCAGGTCGTTTTTC-1 | GSM4626768 | Normal |
| GSM4626768_ACGCCAGGTCTGCGGT-1  | GSM4626768 | Normal |
| GSM4626768_ACGCCAGTCATTGCGA-1  | GSM4626768 | Normal |
| GSM4626768_ACGCCAGTCCTGCTTG-1  | GSM4626768 | Normal |
| GSM4626768_ACGCCAGTCGCATGAT-1  | GSM4626768 | Normal |
| GSM4626768_ACGCCAGTCGTGGTCG-1  | GSM4626768 | Normal |
| GSM4626768_ACGCCAGTCTAACTCT-1  | GSM4626768 | Normal |
| GSM4626768_ACGCCAGTCTGGGCCA-1  | GSM4626768 | Normal |
| GSM4626768_ACGCCGAAGAATGTTG-1  | GSM4626768 | Normal |
| GSM4626768_ACGCCGAAGTTACCCA-1  | GSM4626768 | Normal |
| GSM4626768_ACGCCGACAAGTCTGT-1  | GSM4626768 | Normal |
| GSM4626768_ACGCCGAGTGCCTGCA-1  | GSM4626768 | Normal |
| GSM4626768_ACGCCGATCGGCATCG-1  | GSM4626768 | Normal |
| GSM4626768_ACGCCGATCTTGCAAG-1  | GSM4626768 | Normal |
| GSM4626768_ACGGAGAAGACTTGAA-1  | GSM4626768 | Normal |
| GSM4626768_ACGGAGAAGAGGTAGA-1  | GSM4626768 | Normal |
| GSM4626768_ACGGAGAAGATGGGTC-1  | GSM4626768 | Normal |
| GSM4626768_ACGGAGAAGCGTTGCC-1  | GSM4626768 | Normal |
| GSM4626768_ACGGAGAAGGGCACTA-1  | GSM4626768 | Normal |
| GSM4626768_ACGGAGACACTTAAGC-1  | GSM4626768 | Normal |
| GSM4626768_ACGGAGACATCGTCGG-1  | GSM4626768 | Normal |
| GSM4626768_ACGGAGAGTCTAGTGT-1  | GSM4626768 | Normal |
| GSM4626768_ACGGAGAGTTAAGACA-1  | GSM4626768 | Normal |
| GSM4626768_ACGGAGATCCTGCAGG-1  | GSM4626768 | Normal |
| GSM4626768_ACGGAGATCGGCATCG-1  | GSM4626768 | Normal |
| GSM4626768_ACGGAGATCTCTGAGA-1  | GSM4626768 | Normal |
| GSM4626768_ACGGCCAAGTGCATG-1   | GSM4626768 | Normal |
| GSM4626768_ACGGCCACACGACGAA-1  | GSM4626768 | Normal |
| GSM4626768_ACGGCCACAGACCCT-1   | GSM4626768 | Normal |
| GSM4626768_ACGGCCAGTATTCGTG-1  | GSM4626768 | Normal |
| GSM4626768_ACGGCCAGTCACTTCC-1  | GSM4626768 | Normal |
| GSM4626768_ACGGCCAGTGAGTATA-1  | GSM4626768 | Normal |
| GSM4626768_ACGGCCATCAACGAAA-1  | GSM4626768 | Normal |

|                                |            |        |
|--------------------------------|------------|--------|
| GSM4626768_ACGGGCTAGAAACCTA-1  | GSM4626768 | Normal |
| GSM4626768_ACGGGCTCACTTCGAA-1  | GSM4626768 | Normal |
| GSM4626768_ACGGGCTGTAGCCTAT-1  | GSM4626768 | Normal |
| GSM4626768_ACGGGCTGTAGGAGTC-1  | GSM4626768 | Normal |
| GSM4626768_ACGGGCTGTGTTGGGA-1  | GSM4626768 | Normal |
| GSM4626768_ACGGGCTTCCATGAAC-1  | GSM4626768 | Normal |
| GSM4626768_ACGGGCTTCCCATTTA-1  | GSM4626768 | Normal |
| GSM4626768_ACGGGCTTCTGCTTGC-1  | GSM4626768 | Normal |
| GSM4626768_ACGGGTCAGAAACGAG-1  | GSM4626768 | Normal |
| GSM4626768_ACGGGTCAGCAATATG-1  | GSM4626768 | Normal |
| GSM4626768_ACGGGTCAGCATGGCA-1  | GSM4626768 | Normal |
| GSM4626768_ACGGGTCAGGCGATAC-1  | GSM4626768 | Normal |
| GSM4626768_ACGGGTCAGTCATGCT-1  | GSM4626768 | Normal |
| GSM4626768_ACGGGTCAGTTAAGTG-1  | GSM4626768 | Normal |
| GSM4626768_ACGGGTCCACAGACAG-1  | GSM4626768 | Normal |
| GSM4626768_ACGGGTCCACGGTTTA-1  | GSM4626768 | Normal |
| GSM4626768_ACGGGTCCAGTTAAC-1   | GSM4626768 | Normal |
| GSM4626768_ACGGGTCCATGCCTAA-1  | GSM4626768 | Normal |
| GSM4626768_ACGGGTCCATGGGAAC-1  | GSM4626768 | Normal |
| GSM4626768_ACGGGTCGTCTTTCAT-1  | GSM4626768 | Normal |
| GSM4626768_ACGGGTCTCACCTTAT-1  | GSM4626768 | Normal |
| GSM4626768_ACGGGTCTCGGTCTAA-1  | GSM4626768 | Normal |
| GSM4626768_ACGTCAAAGTTCGCAT-1  | GSM4626768 | Normal |
| GSM4626768_ACGTCAACAAACGCGA-1  | GSM4626768 | Normal |
| GSM4626768_ACGTCAACAAAGCGGT-1  | GSM4626768 | Normal |
| GSM4626768_ACGTCAAGTAACGACG-1  | GSM4626768 | Normal |
| GSM4626768_ACGTCAAGTTGAGTTC-1  | GSM4626768 | Normal |
| GSM4626768_ACGTCAAGTTGGACCC-1  | GSM4626768 | Normal |
| GSM4626768_ACGTCAATCGAATGGG-1  | GSM4626768 | Normal |
| GSM4626768_ACGTCAATCGTTGACA-1  | GSM4626768 | Normal |
| GSM4626768_ACGTCAATCTCTGTGCG-1 | GSM4626768 | Normal |
| GSM4626768_ACTATCTCAACGCACC-1  | GSM4626768 | Normal |
| GSM4626768_ACTATCTCAGACAAGC-1  | GSM4626768 | Normal |
| GSM4626768_ACTATCTCAGTCTTCC-1  | GSM4626768 | Normal |
| GSM4626768_ACTATCTGTAGCCTCG-1  | GSM4626768 | Normal |
| GSM4626768_ACTATCTGTGACGGTA-1  | GSM4626768 | Normal |
| GSM4626768_ACTATCTGTGTCCTCT-1  | GSM4626768 | Normal |
| GSM4626768_ACTATCTTCAGATAAG-1  | GSM4626768 | Normal |
| GSM4626768_ACTATCTTCATACGGT-1  | GSM4626768 | Normal |
| GSM4626768_ACTGAACAGACCCACC-1  | GSM4626768 | Normal |
| GSM4626768_ACTGAACAGTACACCT-1  | GSM4626768 | Normal |
| GSM4626768_ACTGAACAGTGTTGAA-1  | GSM4626768 | Normal |
| GSM4626768_ACTGAACCACACCGAC-1  | GSM4626768 | Normal |
| GSM4626768_ACTGAACTCTGCTTGC-1  | GSM4626768 | Normal |
| GSM4626768_ACTGAACTCTTAGAGC-1  | GSM4626768 | Normal |
| GSM4626768_ACTGAACTCTTGTCAT-1  | GSM4626768 | Normal |
| GSM4626768_ACTGAGTCAAGGGTCA-1  | GSM4626768 | Normal |
| GSM4626768_ACTGAGTCATCACAAAC-1 | GSM4626768 | Normal |
| GSM4626768_ACTGAGTCATTGGTAC-1  | GSM4626768 | Normal |
| GSM4626768_ACTGAGTGTCTGATTG-1  | GSM4626768 | Normal |
| GSM4626768_ACTGAGTTCCTGCCAT-1  | GSM4626768 | Normal |
| GSM4626768_ACTGAGTTCGCCATAA-1  | GSM4626768 | Normal |
| GSM4626768_ACTGATGAGAGGTACC-1  | GSM4626768 | Normal |
| GSM4626768_ACTGATGAGATCACGG-1  | GSM4626768 | Normal |
| GSM4626768_ACTGATGCAAGTCATC-1  | GSM4626768 | Normal |
| GSM4626768_ACTGATGCACCTCGGA-1  | GSM4626768 | Normal |
| GSM4626768_ACTGATGCAGTTCCT-1   | GSM4626768 | Normal |

|                                 |            |        |
|---------------------------------|------------|--------|
| GSM4626768_ACTGATGGTAGCGATG-1   | GSM4626768 | Normal |
| GSM4626768_ACTGATGGTCTGCAAT-1   | GSM4626768 | Normal |
| GSM4626768_ACTGATGGTGCTCTTC-1   | GSM4626768 | Normal |
| GSM4626768_ACTGATGGTGTTTCA-1    | GSM4626768 | Normal |
| GSM4626768_ACTGATGGTTACGTCA-1   | GSM4626768 | Normal |
| GSM4626768_ACTGATGGTTATTCTC-1   | GSM4626768 | Normal |
| GSM4626768_ACTGATGTCCTGTACC-1   | GSM4626768 | Normal |
| GSM4626768_ACTGATGTCGTGGGAA-1   | GSM4626768 | Normal |
| GSM4626768_ACTGCTCAGGGTATCG-1   | GSM4626768 | Normal |
| GSM4626768_ACTGCTCCAGGGTACA-1   | GSM4626768 | Normal |
| GSM4626768_ACTGCTCGTGGGTATG-1   | GSM4626768 | Normal |
| GSM4626768_ACTGCTCTCACCTTAT-1   | GSM4626768 | Normal |
| GSM4626768_ACTGCTCTCGCTAGCG-1   | GSM4626768 | Normal |
| GSM4626768_ACTGCTCTCTGCCCTA-1   | GSM4626768 | Normal |
| GSM4626768_ACTGCTCTCTGCTGTC-1   | GSM4626768 | Normal |
| GSM4626768_ACTGTCCAGAACAAC-1    | GSM4626768 | Normal |
| GSM4626768_ACTGTCCAGCGGATCA-1   | GSM4626768 | Normal |
| GSM4626768_ACTGTCCAGTAGGTGC-1   | GSM4626768 | Normal |
| GSM4626768_ACTGTCCCAAAGTCT-1    | GSM4626768 | Normal |
| GSM4626768_ACTGTCCCAATACGCT-1   | GSM4626768 | Normal |
| GSM4626768_ACTGTCCCAATCAGAA-1   | GSM4626768 | Normal |
| GSM4626768_ACTGTCCCAACCCATTC-1  | GSM4626768 | Normal |
| GSM4626768_ACTGTCCGTAAGTGGC-1   | GSM4626768 | Normal |
| GSM4626768_ACTGTCCGTCTCCCTA-1   | GSM4626768 | Normal |
| GSM4626768_ACTGTCCGTCTGCAAT-1   | GSM4626768 | Normal |
| GSM4626768_ACTGTCCGTGAGTGAC-1   | GSM4626768 | Normal |
| GSM4626768_ACTGTCCCTCCACGACG-1  | GSM4626768 | Normal |
| GSM4626768_ACTTACTAGACTAGGC-1   | GSM4626768 | Normal |
| GSM4626768_ACTTACTAGCCTATGT-1   | GSM4626768 | Normal |
| GSM4626768_ACTTACTAGTCCATAC-1   | GSM4626768 | Normal |
| GSM4626768_ACTTACTAGTGACCT-1    | GSM4626768 | Normal |
| GSM4626768_ACTTACTCACGGACAA-1   | GSM4626768 | Normal |
| GSM4626768_ACTTACTCAGTATCTG-1   | GSM4626768 | Normal |
| GSM4626768_ACTTACTGTGGTAACG-1   | GSM4626768 | Normal |
| GSM4626768_ACTTACTGTGTTTGTG-1   | GSM4626768 | Normal |
| GSM4626768_ACTTACTGTTCCAACA-1   | GSM4626768 | Normal |
| GSM4626768_ACTTACTGTTGATTGC-1   | GSM4626768 | Normal |
| GSM4626768_ACTTACTTCGCATGAT-1   | GSM4626768 | Normal |
| GSM4626768_ACTTGTTAGTCCATAC-1   | GSM4626768 | Normal |
| GSM4626768_ACTTGTTCAATCACAC-1   | GSM4626768 | Normal |
| GSM4626768_ACTTGTTCACACTGCG-1   | GSM4626768 | Normal |
| GSM4626768_ACTTGTTGTAATTGGA-1   | GSM4626768 | Normal |
| GSM4626768_ACTTGTTGTACACCGC-1   | GSM4626768 | Normal |
| GSM4626768_ACTTGTTGTAGCGCTC-1   | GSM4626768 | Normal |
| GSM4626768_ACTTGTTGTGACTCAT-1   | GSM4626768 | Normal |
| GSM4626768_ACTTGTTGTGATAAAC-1   | GSM4626768 | Normal |
| GSM4626768_ACTTGTTGTGCAGACA-1   | GSM4626768 | Normal |
| GSM4626768_ACTTGTTGTTAAGATG-1   | GSM4626768 | Normal |
| GSM4626768_ACTTGTTGTTAAGGGC-1   | GSM4626768 | Normal |
| GSM4626768_ACTTGTTTCAGCTTAG-1   | GSM4626768 | Normal |
| GSM4626768_ACTTGTTTCGCCATAA-1   | GSM4626768 | Normal |
| GSM4626768_ACTTGTTTCTTCAACT-1   | GSM4626768 | Normal |
| GSM4626768_ACTTTCAAGGTGCACA-1   | GSM4626768 | Normal |
| GSM4626768_ACTTTCAAGTCTCGGC-1   | GSM4626768 | Normal |
| GSM4626768_ACTTTCAAGTTCCACAA-1  | GSM4626768 | Normal |
| GSM4626768_ACTTTCAAGTTGGAGGT-1  | GSM4626768 | Normal |
| GSM4626768_ACTTTTCATCACCCCTCA-1 | GSM4626768 | Normal |

|                               |            |        |
|-------------------------------|------------|--------|
| GSM4626768_ACTTTCATCGGCCGAT-1 | GSM4626768 | Normal |
| GSM4626768_AGAATAGAGATGCGAC-1 | GSM4626768 | Normal |
| GSM4626768_AGAATAGAGTACGCGA-1 | GSM4626768 | Normal |
| GSM4626768_AGAATAGCAATGAAAC-1 | GSM4626768 | Normal |
| GSM4626768_AGAATAGCACACGCC-1  | GSM4626768 | Normal |
| GSM4626768_AGAATAGCACACGCTG-1 | GSM4626768 | Normal |
| GSM4626768_AGAATAGCAGGTCTCG-1 | GSM4626768 | Normal |
| GSM4626768_AGAATAGTCCGGTCT-1  | GSM4626768 | Normal |
| GSM4626768_AGAATAGTCAGTTCGA-1 | GSM4626768 | Normal |
| GSM4626768_AGAATAGTCGCGTTTC-1 | GSM4626768 | Normal |
| GSM4626768_AGAATAGTCGGATGGA-1 | GSM4626768 | Normal |
| GSM4626768_AGAATAGTCGTTTAGG-1 | GSM4626768 | Normal |
| GSM4626768_AGACGTTAGGCTATCT-1 | GSM4626768 | Normal |
| GSM4626768_AGACGTTCACTAAGTC-1 | GSM4626768 | Normal |
| GSM4626768_AGACGTTTCCTTTACA-1 | GSM4626768 | Normal |
| GSM4626768_AGACGTTTCGCTGATA-1 | GSM4626768 | Normal |
| GSM4626768_AGAGCGAAGAAACCTA-1 | GSM4626768 | Normal |
| GSM4626768_AGAGCGAAGAAGGGTA-1 | GSM4626768 | Normal |
| GSM4626768_AGAGCGAAGATACACA-1 | GSM4626768 | Normal |
| GSM4626768_AGAGCGAAGGTAAACT-1 | GSM4626768 | Normal |
| GSM4626768_AGAGCGAAGTGTCTCA-1 | GSM4626768 | Normal |
| GSM4626768_AGAGCGACATATGAGA-1 | GSM4626768 | Normal |
| GSM4626768_AGAGCGACATCGGGTC-1 | GSM4626768 | Normal |
| GSM4626768_AGAGCGACATGCCTAA-1 | GSM4626768 | Normal |
| GSM4626768_AGAGCGAGTCGTGGCT-1 | GSM4626768 | Normal |
| GSM4626768_AGAGCGAGTGATGCC-1  | GSM4626768 | Normal |
| GSM4626768_AGAGCGAGTGCGATAG-1 | GSM4626768 | Normal |
| GSM4626768_AGAGCGAGTTATGCGT-1 | GSM4626768 | Normal |
| GSM4626768_AGAGCGATCACTTACT-1 | GSM4626768 | Normal |
| GSM4626768_AGAGCGATCCACTCCA-1 | GSM4626768 | Normal |
| GSM4626768_AGAGCGATCTTTACGT-1 | GSM4626768 | Normal |
| GSM4626768_AGAGCTTAGTGAGAA-1  | GSM4626768 | Normal |
| GSM4626768_AGAGCTTCAAGTAATG-1 | GSM4626768 | Normal |
| GSM4626768_AGAGCTTACGTCTCT-1  | GSM4626768 | Normal |
| GSM4626768_AGAGCTTCATCTCCCA-1 | GSM4626768 | Normal |
| GSM4626768_AGAGCTTGTAACACA-1  | GSM4626768 | Normal |
| GSM4626768_AGAGCTTGTCGAGTTT-1 | GSM4626768 | Normal |
| GSM4626768_AGAGCTTGATGATA-1   | GSM4626768 | Normal |
| GSM4626768_AGAGCTTGATGTCT-1   | GSM4626768 | Normal |
| GSM4626768_AGAGCTTTCAAACAAG-1 | GSM4626768 | Normal |
| GSM4626768_AGAGCTTTCATAGCAC-1 | GSM4626768 | Normal |
| GSM4626768_AGAGTGGAGGCGCTCT-1 | GSM4626768 | Normal |
| GSM4626768_AGAGTGGAGTCTCCTC-1 | GSM4626768 | Normal |
| GSM4626768_AGAGTGGAGTTCCACA-1 | GSM4626768 | Normal |
| GSM4626768_AGAGTGGCAAGCCTAT-1 | GSM4626768 | Normal |
| GSM4626768_AGAGTGGCACTGAAGG-1 | GSM4626768 | Normal |
| GSM4626768_AGAGTGGCAGCTATTG-1 | GSM4626768 | Normal |
| GSM4626768_AGAGTGGGTGATGCC-1  | GSM4626768 | Normal |
| GSM4626768_AGAGTGGGTTCAGTAC-1 | GSM4626768 | Normal |
| GSM4626768_AGATCTGAGCCCAGCT-1 | GSM4626768 | Normal |
| GSM4626768_AGATCTGAGTCACGCC-1 | GSM4626768 | Normal |
| GSM4626768_AGATCTGCAATCGAAA-1 | GSM4626768 | Normal |
| GSM4626768_AGATCTGCAGATGGCA-1 | GSM4626768 | Normal |
| GSM4626768_AGATCTGCATAAGACA-1 | GSM4626768 | Normal |
| GSM4626768_AGATCTGGTCTAGCGC-1 | GSM4626768 | Normal |
| GSM4626768_AGATCTGGTCTGGTCG-1 | GSM4626768 | Normal |
| GSM4626768_AGATCTGGTGTGAATA-1 | GSM4626768 | Normal |

|                                |            |        |
|--------------------------------|------------|--------|
| GSM4626768_AGATCTGTCATATCGG-1  | GSM4626768 | Normal |
| GSM4626768_AGATTGCAGATCGATA-1  | GSM4626768 | Normal |
| GSM4626768_AGATTGCAGCGCCTTG-1  | GSM4626768 | Normal |
| GSM4626768_AGATTGCCAAGGTTTC-1  | GSM4626768 | Normal |
| GSM4626768_AGATTGCCAGTTCATG-1  | GSM4626768 | Normal |
| GSM4626768_AGATTGCCATTTCACT-1  | GSM4626768 | Normal |
| GSM4626768_AGATTGCGTAAGGGAA-1  | GSM4626768 | Normal |
| GSM4626768_AGATTGCGTCGAAAGC-1  | GSM4626768 | Normal |
| GSM4626768_AGATTGCGTCGGATCC-1  | GSM4626768 | Normal |
| GSM4626768_AGATTGCTCATAACCG-1  | GSM4626768 | Normal |
| GSM4626768_AGATTGCTCCGTACAA-1  | GSM4626768 | Normal |
| GSM4626768_AGATTGCTCGCATGGC-1  | GSM4626768 | Normal |
| GSM4626768_AGATTGCTCTTCAACT-1  | GSM4626768 | Normal |
| GSM4626768_AGCAGCCAGCGATCCC-1  | GSM4626768 | Normal |
| GSM4626768_AGCAGCCCAAGTCATC-1  | GSM4626768 | Normal |
| GSM4626768_AGCAGCCCACAGGTTT-1  | GSM4626768 | Normal |
| GSM4626768_AGCAGCCCATCCGTGG-1  | GSM4626768 | Normal |
| GSM4626768_AGCAGCCCATGCTGGC-1  | GSM4626768 | Normal |
| GSM4626768_AGCAGCCGTACCCAAT-1  | GSM4626768 | Normal |
| GSM4626768_AGCAGCCGTCTAACGT-1  | GSM4626768 | Normal |
| GSM4626768_AGCAGCCGTCTCACCT-1  | GSM4626768 | Normal |
| GSM4626768_AGCAGCCGTTCGGCAC-1  | GSM4626768 | Normal |
| GSM4626768_AGCAGCCTCAGCTCGG-1  | GSM4626768 | Normal |
| GSM4626768_AGCAGCCTCCGGGTGT-1  | GSM4626768 | Normal |
| GSM4626768_AGCAGCCTCCGTCAA-1   | GSM4626768 | Normal |
| GSM4626768_AGCAGCCTCTGGAGCC-1  | GSM4626768 | Normal |
| GSM4626768_AGCATACAGACCTTTG-1  | GSM4626768 | Normal |
| GSM4626768_AGCATACAGGCATGGT-1  | GSM4626768 | Normal |
| GSM4626768_AGCATACCAACGCACC-1  | GSM4626768 | Normal |
| GSM4626768_AGCATACGTAATTGGA-1  | GSM4626768 | Normal |
| GSM4626768_AGCATACGTCTTCAAG-1  | GSM4626768 | Normal |
| GSM4626768_AGCATACTCAATCACG-1  | GSM4626768 | Normal |
| GSM4626768_AGCATACTCATACGGT-1  | GSM4626768 | Normal |
| GSM4626768_AGCATACTCCACTGGG-1  | GSM4626768 | Normal |
| GSM4626768_AGCATACTCCGTAGTA-1  | GSM4626768 | Normal |
| GSM4626768_AGCATACTCGCAA-1     | GSM4626768 | Normal |
| GSM4626768_AGCATACTCGCCTGAG-1  | GSM4626768 | Normal |
| GSM4626768_AGCATACTCGCGGATC-1  | GSM4626768 | Normal |
| GSM4626768_AGCATACTCGGAATCT-1  | GSM4626768 | Normal |
| GSM4626768_AGCCTAAAGCCAACAG-1  | GSM4626768 | Normal |
| GSM4626768_AGCCTAAAGCTATGCT-1  | GSM4626768 | Normal |
| GSM4626768_AGCCTAACAGGGTTAG-1  | GSM4626768 | Normal |
| GSM4626768_AGCCTAACATCGGAAG-1  | GSM4626768 | Normal |
| GSM4626768_AGCCTAAGTCTGGTCG-1  | GSM4626768 | Normal |
| GSM4626768_AGCCTAAGTGCGATAG-1  | GSM4626768 | Normal |
| GSM4626768_AGCGGTTCAGATATGCA-1 | GSM4626768 | Normal |
| GSM4626768_AGCGGTTCAGTACGACG-1 | GSM4626768 | Normal |
| GSM4626768_AGCGGTTCAGTGGACGT-1 | GSM4626768 | Normal |
| GSM4626768_AGCGGTCCAATCCAAC-1  | GSM4626768 | Normal |
| GSM4626768_AGCGGTCCACACGCTG-1  | GSM4626768 | Normal |
| GSM4626768_AGCGGTCCACAGACTT-1  | GSM4626768 | Normal |
| GSM4626768_AGCGGTCCATATGCTG-1  | GSM4626768 | Normal |
| GSM4626768_AGCGTATAGGACGAAA-1  | GSM4626768 | Normal |
| GSM4626768_AGCGTATAGTCGAGTG-1  | GSM4626768 | Normal |
| GSM4626768_AGCGTATACACAGGCT-1  | GSM4626768 | Normal |
| GSM4626768_AGCGTATGTGCAGTAG-1  | GSM4626768 | Normal |
| GSM4626768_AGCGTCGAGCTTTGGT-1  | GSM4626768 | Normal |

|                                |            |        |
|--------------------------------|------------|--------|
| GSM4626768_AGCGTCGGTAGTACCT-1  | GSM4626768 | Normal |
| GSM4626768_AGCGTCGGTCGTGGCT-1  | GSM4626768 | Normal |
| GSM4626768_AGCGTCGTCTATGTT-1   | GSM4626768 | Normal |
| GSM4626768_AGCGTCGTCTTAATC-1   | GSM4626768 | Normal |
| GSM4626768_AGCGTCGTCCCGTGA-1   | GSM4626768 | Normal |
| GSM4626768_AGCGTCGTCTGATTCT-1  | GSM4626768 | Normal |
| GSM4626768_AGCTCCTAGTGCCAGA-1  | GSM4626768 | Normal |
| GSM4626768_AGCTCCTCACAAGTAA-1  | GSM4626768 | Normal |
| GSM4626768_AGCTCCTCATACCATG-1  | GSM4626768 | Normal |
| GSM4626768_AGCTCCTGTCCGCTGA-1  | GSM4626768 | Normal |
| GSM4626768_AGCTCCTGTCCGTGAC-1  | GSM4626768 | Normal |
| GSM4626768_AGCTCCTGTGCACTTA-1  | GSM4626768 | Normal |
| GSM4626768_AGCTCCTGTGTGCCTG-1  | GSM4626768 | Normal |
| GSM4626768_AGCTCCTGTTGAGGTG-1  | GSM4626768 | Normal |
| GSM4626768_AGCTCCTGTTGTGGCC-1  | GSM4626768 | Normal |
| GSM4626768_AGCTCCTTCCAGTATG-1  | GSM4626768 | Normal |
| GSM4626768_AGCTCCTTCGGCGGTT-1  | GSM4626768 | Normal |
| GSM4626768_AGCTCCTTCTCGCTTG-1  | GSM4626768 | Normal |
| GSM4626768_AGCTCCTTCTGGCGAC-1  | GSM4626768 | Normal |
| GSM4626768_AGCTCCTTCTTCGAGA-1  | GSM4626768 | Normal |
| GSM4626768_AGCTCTCAGACTAGGC-1  | GSM4626768 | Normal |
| GSM4626768_AGCTCTCAGAGTGACC-1  | GSM4626768 | Normal |
| GSM4626768_AGCTCTCAGATACACA-1  | GSM4626768 | Normal |
| GSM4626768_AGCTCTCAGCGTGTCC-1  | GSM4626768 | Normal |
| GSM4626768_AGCTCTCAGTAGTGCG-1  | GSM4626768 | Normal |
| GSM4626768_AGCTCTCAGTTCGCAT-1  | GSM4626768 | Normal |
| GSM4626768_AGCTCTCCAAGTGGCC-1  | GSM4626768 | Normal |
| GSM4626768_AGCTCTCCATTGCGGC-1  | GSM4626768 | Normal |
| GSM4626768_AGCTCTCCATTTGCTT-1  | GSM4626768 | Normal |
| GSM4626768_AGCTCTCGTCCCTACT-1  | GSM4626768 | Normal |
| GSM4626768_AGCTCTCGTCTAGTGT-1  | GSM4626768 | Normal |
| GSM4626768_AGCTCTCGTGCCTGGT-1  | GSM4626768 | Normal |
| GSM4626768_AGCTCTCTCACAGTAC-1  | GSM4626768 | Normal |
| GSM4626768_AGCTCTCTCACTGGGC-1  | GSM4626768 | Normal |
| GSM4626768_AGCTCTCTCCAGTATG-1  | GSM4626768 | Normal |
| GSM4626768_AGCTCTCTCTAGAGTC-1  | GSM4626768 | Normal |
| GSM4626768_AGCTTGAAAGTGGCACA-1 | GSM4626768 | Normal |
| GSM4626768_AGCTTGAGTTCGAATCT-1 | GSM4626768 | Normal |
| GSM4626768_AGCTTGAGTTGTCGCG-1  | GSM4626768 | Normal |
| GSM4626768_AGCTTGATCACAAACC-1  | GSM4626768 | Normal |
| GSM4626768_AGCTTGATCCAAGCCG-1  | GSM4626768 | Normal |
| GSM4626768_AGCTTGATCTGCAGTA-1  | GSM4626768 | Normal |
| GSM4626768_AGGCCACAGTAGCCGA-1  | GSM4626768 | Normal |
| GSM4626768_AGGCCACCACCTGGTG-1  | GSM4626768 | Normal |
| GSM4626768_AGGCCACCACGGCTAC-1  | GSM4626768 | Normal |
| GSM4626768_AGGCCACCACTGTGTA-1  | GSM4626768 | Normal |
| GSM4626768_AGGCCACGTAGAAGGA-1  | GSM4626768 | Normal |
| GSM4626768_AGGCCACGTCTGCGGT-1  | GSM4626768 | Normal |
| GSM4626768_AGGCCACGTTCCGGCAC-1 | GSM4626768 | Normal |
| GSM4626768_AGGCCACTCAAAGACA-1  | GSM4626768 | Normal |
| GSM4626768_AGGCCACTCAAGGTAA-1  | GSM4626768 | Normal |
| GSM4626768_AGGCCACTCCGCTGTT-1  | GSM4626768 | Normal |
| GSM4626768_AGGCCACTCGTAGATC-1  | GSM4626768 | Normal |
| GSM4626768_AGGCCACTCGTTGACA-1  | GSM4626768 | Normal |
| GSM4626768_AGGCCACTCTAGAGTC-1  | GSM4626768 | Normal |
| GSM4626768_AGGCCACTCTCAAACG-1  | GSM4626768 | Normal |
| GSM4626768_AGGCCGTAGAACAAC-1   | GSM4626768 | Normal |



|                                |            |        |
|--------------------------------|------------|--------|
| GSM4626768_AGGCCGTAGGAGTACC-1  | GSM4626768 | Normal |
| GSM4626768_AGGCCGTCAAACAACA-1  | GSM4626768 | Normal |
| GSM4626768_AGGCCGTCAAGGAATCG-1 | GSM4626768 | Normal |
| GSM4626768_AGGCCGTCAATGAACCT-1 | GSM4626768 | Normal |
| GSM4626768_AGGCCGTGTACGCACC-1  | GSM4626768 | Normal |
| GSM4626768_AGGCCGTGTATTTCGTG-1 | GSM4626768 | Normal |
| GSM4626768_AGGCCGTTCAATCTCT-1  | GSM4626768 | Normal |
| GSM4626768_AGGCCGTTTCAGCGATT-1 | GSM4626768 | Normal |
| GSM4626768_AGGCCGTTCTTGCCA-1   | GSM4626768 | Normal |
| GSM4626768_AGGCCGTTTCGACCAGC-1 | GSM4626768 | Normal |
| GSM4626768_AGGCCGTTCTAACTTC-1  | GSM4626768 | Normal |
| GSM4626768_AGGCCGTTCTTATCTG-1  | GSM4626768 | Normal |
| GSM4626768_AGGGAGTAGACTTTTCG-1 | GSM4626768 | Normal |
| GSM4626768_AGGGATGAGACAGACC-1  | GSM4626768 | Normal |
| GSM4626768_AGGGATGAGAGTAAGG-1  | GSM4626768 | Normal |
| GSM4626768_AGGGATGAGATGTGGC-1  | GSM4626768 | Normal |
| GSM4626768_AGGGATGAGGGAGTAA-1  | GSM4626768 | Normal |
| GSM4626768_AGGGATGAGTCATCCA-1  | GSM4626768 | Normal |
| GSM4626768_AGGGATGCACAGCGTC-1  | GSM4626768 | Normal |
| GSM4626768_AGGGATGCAGATAATG-1  | GSM4626768 | Normal |
| GSM4626768_AGGGATGCATGCTAGT-1  | GSM4626768 | Normal |
| GSM4626768_AGGGATGTCTCGAGTA-1  | GSM4626768 | Normal |
| GSM4626768_AGGGATGTCTTTAGGG-1  | GSM4626768 | Normal |
| GSM4626768_AGGGTGAAGTACCGGA-1  | GSM4626768 | Normal |
| GSM4626768_AGGGTGACAGTCAGCC-1  | GSM4626768 | Normal |
| GSM4626768_AGGGTGACAGTTAACC-1  | GSM4626768 | Normal |
| GSM4626768_AGGGTGACATCACGAT-1  | GSM4626768 | Normal |
| GSM4626768_AGGGTGAGTCGCGGTT-1  | GSM4626768 | Normal |
| GSM4626768_AGGGTGAGTGCAACTT-1  | GSM4626768 | Normal |
| GSM4626768_AGGGTGATCTTACCTA-1  | GSM4626768 | Normal |
| GSM4626768_AGGGTGATCTTCATGT-1  | GSM4626768 | Normal |
| GSM4626768_AGGTCATAGCAGGTCA-1  | GSM4626768 | Normal |
| GSM4626768_AGGTCATAGTTCCACA-1  | GSM4626768 | Normal |
| GSM4626768_AGGTCATGTCCGTTAA-1  | GSM4626768 | Normal |
| GSM4626768_AGGTCATGTCTCCATC-1  | GSM4626768 | Normal |
| GSM4626768_AGGTCCGAGAAGGACA-1  | GSM4626768 | Normal |
| GSM4626768_AGGTCCGAGTAGGCCA-1  | GSM4626768 | Normal |
| GSM4626768_AGGTCCGAGTCGATAA-1  | GSM4626768 | Normal |
| GSM4626768_AGGTCCGCAATTGCTG-1  | GSM4626768 | Normal |
| GSM4626768_AGGTCCGCACCCATGG-1  | GSM4626768 | Normal |
| GSM4626768_AGGTCCGCAGGTGCCT-1  | GSM4626768 | Normal |
| GSM4626768_AGGTCCGGTTTGTGG-1   | GSM4626768 | Normal |
| GSM4626768_AGGTCCGTCCAGGTG-1   | GSM4626768 | Normal |
| GSM4626768_AGGTCCGTCCGAGCAA-1  | GSM4626768 | Normal |
| GSM4626768_AGGTCCGTCGTTACGA-1  | GSM4626768 | Normal |
| GSM4626768_AGTAGTCAGACCACGA-1  | GSM4626768 | Normal |
| GSM4626768_AGTAGTCCAATCTACG-1  | GSM4626768 | Normal |
| GSM4626768_AGTAGTCGTTAAAGTG-1  | GSM4626768 | Normal |
| GSM4626768_AGTAGTCTCCAATGGT-1  | GSM4626768 | Normal |
| GSM4626768_AGTAGTCTCCTATGTT-1  | GSM4626768 | Normal |
| GSM4626768_AGTCTTTCACCATCCT-1  | GSM4626768 | Normal |
| GSM4626768_AGTCTTTCACTTAACG-1  | GSM4626768 | Normal |
| GSM4626768_AGTCTTTCATTGGTAC-1  | GSM4626768 | Normal |
| GSM4626768_AGTCTTTGTAACGCGA-1  | GSM4626768 | Normal |
| GSM4626768_AGTCTTTGTAATTGGA-1  | GSM4626768 | Normal |
| GSM4626768_AGTCTTTGTACGCACC-1  | GSM4626768 | Normal |
| GSM4626768_AGTCTTTGTGCTAGCC-1  | GSM4626768 | Normal |

|                               |            |        |
|-------------------------------|------------|--------|
| GSM4626768_AGTGAGGAGAGAGCTC-1 | GSM4626768 | Normal |
| GSM4626768_AGTGAGGAGCGCTCCA-1 | GSM4626768 | Normal |
| GSM4626768_AGTGAGGAGGCGATAC-1 | GSM4626768 | Normal |
| GSM4626768_AGTGAGGAGTGAACAT-1 | GSM4626768 | Normal |
| GSM4626768_AGTGAGGCAAGTAGTA-1 | GSM4626768 | Normal |
| GSM4626768_AGTGAGGCATAGGATA-1 | GSM4626768 | Normal |
| GSM4626768_AGTGAGGGTGGTTTCA-1 | GSM4626768 | Normal |
| GSM4626768_AGTGAGGTCCGTAGGC-1 | GSM4626768 | Normal |
| GSM4626768_AGTGGGAAGCCAACAG-1 | GSM4626768 | Normal |
| GSM4626768_AGTGGGACAGCCTGTG-1 | GSM4626768 | Normal |
| GSM4626768_AGTGGGAGTGTTTGGT-1 | GSM4626768 | Normal |
| GSM4626768_AGTGGGAGTTCCACGG-1 | GSM4626768 | Normal |
| GSM4626768_AGTGGGATCACTATTC-1 | GSM4626768 | Normal |
| GSM4626768_AGTGGGATCGAACTGT-1 | GSM4626768 | Normal |
| GSM4626768_AGTGTCAAGACAGGCT-1 | GSM4626768 | Normal |
| GSM4626768_AGTGTCAAGAGGGCTT-1 | GSM4626768 | Normal |
| GSM4626768_AGTGTCAAGTCAAGGC-1 | GSM4626768 | Normal |
| GSM4626768_AGTGTCACACGTGAGA-1 | GSM4626768 | Normal |
| GSM4626768_AGTGTCACACTCAGGC-1 | GSM4626768 | Normal |
| GSM4626768_AGTGTCACAGACTCGC-1 | GSM4626768 | Normal |
| GSM4626768_AGTGTCAGTAAGCACG-1 | GSM4626768 | Normal |
| GSM4626768_AGTGTCATCCGCATAA-1 | GSM4626768 | Normal |
| GSM4626768_AGTGTCATCGTATCAG-1 | GSM4626768 | Normal |
| GSM4626768_AGTGTCATCGTCACGG-1 | GSM4626768 | Normal |
| GSM4626768_AGTGTCATCTATCCCG-1 | GSM4626768 | Normal |
| GSM4626768_AGTTGGTAGAGTACCG-1 | GSM4626768 | Normal |
| GSM4626768_AGTTGGTAGCCACGCT-1 | GSM4626768 | Normal |
| GSM4626768_AGTTGGTAGCCACTAT-1 | GSM4626768 | Normal |
| GSM4626768_AGTTGGTAGCCCAACC-1 | GSM4626768 | Normal |
| GSM4626768_AGTTGGTCAAGAGGCT-1 | GSM4626768 | Normal |
| GSM4626768_AGTTGGTCAAGCGATG-1 | GSM4626768 | Normal |
| GSM4626768_AGTTGGTCAGCAGTTT-1 | GSM4626768 | Normal |
| GSM4626768_AGTTGGTGTACAGTGG-1 | GSM4626768 | Normal |
| GSM4626768_AGTTGGTGTGTATGGG-1 | GSM4626768 | Normal |
| GSM4626768_AGTTGGTTCCTGTAGA-1 | GSM4626768 | Normal |
| GSM4626768_ATAACGCAGATCGGGT-1 | GSM4626768 | Normal |
| GSM4626768_ATAACGCAGGCTCTTA-1 | GSM4626768 | Normal |
| GSM4626768_ATAACGCCAATAGAGT-1 | GSM4626768 | Normal |
| GSM4626768_ATAACGCCACAACGTT-1 | GSM4626768 | Normal |
| GSM4626768_ATAACGCCACGCGGTT-1 | GSM4626768 | Normal |
| GSM4626768_ATAACGCCATCCTTGC-1 | GSM4626768 | Normal |
| GSM4626768_ATAACGCGTGAGGCTA-1 | GSM4626768 | Normal |
| GSM4626768_ATAACGCGTTCGCTAA-1 | GSM4626768 | Normal |
| GSM4626768_ATAACGCTCAAGGCTT-1 | GSM4626768 | Normal |
| GSM4626768_ATAACGCTCCGAACGC-1 | GSM4626768 | Normal |
| GSM4626768_ATAAGAGAGGATGTAT-1 | GSM4626768 | Normal |
| GSM4626768_ATAAGAGAGGGTGTGT-1 | GSM4626768 | Normal |
| GSM4626768_ATAAGAGGTTCTGTAT-1 | GSM4626768 | Normal |
| GSM4626768_ATAAGAGTCCGTCAA-1  | GSM4626768 | Normal |
| GSM4626768_ATAAGAGTCGGTCCGA-1 | GSM4626768 | Normal |
| GSM4626768_ATAGACCAGGCAAAGA-1 | GSM4626768 | Normal |
| GSM4626768_ATAGACCCACTAAGTC-1 | GSM4626768 | Normal |
| GSM4626768_ATAGACCCATCCTTGC-1 | GSM4626768 | Normal |
| GSM4626768_ATAGACCCATGTCTCC-1 | GSM4626768 | Normal |
| GSM4626768_ATAGACCGTACCGGCT-1 | GSM4626768 | Normal |
| GSM4626768_ATAGACCGTGGTTTCA-1 | GSM4626768 | Normal |
| GSM4626768_ATAGACCGTGTCTGAT-1 | GSM4626768 | Normal |

|                                |            |        |
|--------------------------------|------------|--------|
| GSM4626768_ATAGACCTCATAAAGG-1  | GSM4626768 | Normal |
| GSM4626768_ATAGACCTCGAGAGCA-1  | GSM4626768 | Normal |
| GSM4626768_ATCACGAAGACAGGCT-1  | GSM4626768 | Normal |
| GSM4626768_ATCACGAAGCTAGTGG-1  | GSM4626768 | Normal |
| GSM4626768_ATCACGAAGTGCCAGA-1  | GSM4626768 | Normal |
| GSM4626768_ATCACGACAGTCTTCC-1  | GSM4626768 | Normal |
| GSM4626768_ATCACGAGTATTCGTG-1  | GSM4626768 | Normal |
| GSM4626768_ATCACGAGTTCGCTAA-1  | GSM4626768 | Normal |
| GSM4626768_ATCACGATCATACGGT-1  | GSM4626768 | Normal |
| GSM4626768_ATCACGATCCACGTTT-1  | GSM4626768 | Normal |
| GSM4626768_ATCACGATCGTTACAG-1  | GSM4626768 | Normal |
| GSM4626768_ATCATCTAGCTAGTGG-1  | GSM4626768 | Normal |
| GSM4626768_ATCATCTAGGACAGAA-1  | GSM4626768 | Normal |
| GSM4626768_ATCATCTAGGTGCTTT-1  | GSM4626768 | Normal |
| GSM4626768_ATCATCTCAAGACACG-1  | GSM4626768 | Normal |
| GSM4626768_ATCATCTCAGCGATCC-1  | GSM4626768 | Normal |
| GSM4626768_ATCATCTCAGTCAGCC-1  | GSM4626768 | Normal |
| GSM4626768_ATCATCTGTAGCAAAT-1  | GSM4626768 | Normal |
| GSM4626768_ATCATCTGTGAACCTT-1  | GSM4626768 | Normal |
| GSM4626768_ATCATCTGTTGATTG-1   | GSM4626768 | Normal |
| GSM4626768_ATCATCTTCATCGGAT-1  | GSM4626768 | Normal |
| GSM4626768_ATCATCTTCGTCCAGG-1  | GSM4626768 | Normal |
| GSM4626768_ATCATCTTCTACCAGA-1  | GSM4626768 | Normal |
| GSM4626768_ATCATCTTCTTAGAGC-1  | GSM4626768 | Normal |
| GSM4626768_ATCATGGAGAAACCGC-1  | GSM4626768 | Normal |
| GSM4626768_ATCATGGAGATGTGTA-1  | GSM4626768 | Normal |
| GSM4626768_ATCATGGAGGGTCTCC-1  | GSM4626768 | Normal |
| GSM4626768_ATCATGGAGTATCTCG-1  | GSM4626768 | Normal |
| GSM4626768_ATCATGGAGTGAATTG-1  | GSM4626768 | Normal |
| GSM4626768_ATCATGGAGTTAACGA-1  | GSM4626768 | Normal |
| GSM4626768_ATCATGGCAAAGGAAG-1  | GSM4626768 | Normal |
| GSM4626768_ATCATGGGTTCCACAA-1  | GSM4626768 | Normal |
| GSM4626768_ATCATGGTCAATACCG-1  | GSM4626768 | Normal |
| GSM4626768_ATCATGGTCTTCGGTC-1  | GSM4626768 | Normal |
| GSM4626768_ATCCACCAGCTAGCCC-1  | GSM4626768 | Normal |
| GSM4626768_ATCCACCAGCTAGGCA-1  | GSM4626768 | Normal |
| GSM4626768_ATCCACCCAAGTACCT-1  | GSM4626768 | Normal |
| GSM4626768_ATCCACCCAATGACCT-1  | GSM4626768 | Normal |
| GSM4626768_ATCCACCCATTTGCTT-1  | GSM4626768 | Normal |
| GSM4626768_ATCCACCTCCGTTGTC-1  | GSM4626768 | Normal |
| GSM4626768_ATCCACCTCCTAAGTG-1  | GSM4626768 | Normal |
| GSM4626768_ATCCACCTCGCGGATC-1  | GSM4626768 | Normal |
| GSM4626768_ATCCACCTCTGGCGTG-1  | GSM4626768 | Normal |
| GSM4626768_ATCCGAAAGCCAGTAG-1  | GSM4626768 | Normal |
| GSM4626768_ATCCGAAAGCTGCAAG-1  | GSM4626768 | Normal |
| GSM4626768_ATCCGAAAGTATGACA-1  | GSM4626768 | Normal |
| GSM4626768_ATCCGAAAGTCTCAAC-1  | GSM4626768 | Normal |
| GSM4626768_ATCCGAAAGTTCCACA-1  | GSM4626768 | Normal |
| GSM4626768_ATCCGAACACGGCCAT-1  | GSM4626768 | Normal |
| GSM4626768_ATCCGAAGTCAAACCTC-1 | GSM4626768 | Normal |
| GSM4626768_ATCCGAATCACCTTAT-1  | GSM4626768 | Normal |
| GSM4626768_ATCCGAATCGCATGGC-1  | GSM4626768 | Normal |
| GSM4626768_ATCCGAATCGGATGGA-1  | GSM4626768 | Normal |
| GSM4626768_ATCCGAATCTCGAGTA-1  | GSM4626768 | Normal |
| GSM4626768_ATCCGAATCTTCCTTC-1  | GSM4626768 | Normal |
| GSM4626768_ATCCGAATCTTGTTTG-1  | GSM4626768 | Normal |
| GSM4626768_ATCCGAGTGTACTTGAC-1 | GSM4626768 | Normal |

|                               |            |        |
|-------------------------------|------------|--------|
| GSM4626768_ATCGAGTGTAGAGTGC-1 | GSM4626768 | Normal |
| GSM4626768_ATCGAGTGTCATTAGC-1 | GSM4626768 | Normal |
| GSM4626768_ATCGAGTGTTGACTG-1  | GSM4626768 | Normal |
| GSM4626768_ATCGAGTTCATCTGTT-1 | GSM4626768 | Normal |
| GSM4626768_ATCGAGTTCGCCTGTT-1 | GSM4626768 | Normal |
| GSM4626768_ATCTACTCAACGCACC-1 | GSM4626768 | Normal |
| GSM4626768_ATCTACTCACAGCCCA-1 | GSM4626768 | Normal |
| GSM4626768_ATCTACTGTCACCCAG-1 | GSM4626768 | Normal |
| GSM4626768_ATCTACTGTCTTTCAT-1 | GSM4626768 | Normal |
| GSM4626768_ATCTACTGTTGGAGGT-1 | GSM4626768 | Normal |
| GSM4626768_ATCTGCCAGAGAACAG-1 | GSM4626768 | Normal |
| GSM4626768_ATCTGCCCAAAGGTGC-1 | GSM4626768 | Normal |
| GSM4626768_ATCTGCCCAGAGCCAA-1 | GSM4626768 | Normal |
| GSM4626768_ATCTGCCCATCGGTTA-1 | GSM4626768 | Normal |
| GSM4626768_ATCTGCCGTGTCGCTG-1 | GSM4626768 | Normal |
| GSM4626768_ATCTGCCGTTCCAACA-1 | GSM4626768 | Normal |
| GSM4626768_ATCTGCCTCATCGATG-1 | GSM4626768 | Normal |
| GSM4626768_ATGAGGGAGACTGGGT-1 | GSM4626768 | Normal |
| GSM4626768_ATGAGGGAGCCACTAT-1 | GSM4626768 | Normal |
| GSM4626768_ATGAGGGGTAGCCTAT-1 | GSM4626768 | Normal |
| GSM4626768_ATGAGGGGTCAAGCGA-1 | GSM4626768 | Normal |
| GSM4626768_ATGAGGGGTCATATCG-1 | GSM4626768 | Normal |
| GSM4626768_ATGAGGGGTGCGAAT-1  | GSM4626768 | Normal |
| GSM4626768_ATGAGGGGTGTAACGG-1 | GSM4626768 | Normal |
| GSM4626768_ATGAGGGTCAACATAG-1 | GSM4626768 | Normal |
| GSM4626768_ATGAGGGTCGACCAGC-1 | GSM4626768 | Normal |
| GSM4626768_ATGAGGGTCTGCTTGC-1 | GSM4626768 | Normal |
| GSM4626768_ATGCGATAGGCTAGGT-1 | GSM4626768 | Normal |
| GSM4626768_ATGCGATGTATAATGG-1 | GSM4626768 | Normal |
| GSM4626768_ATGCGATTCTATGTT-1  | GSM4626768 | Normal |
| GSM4626768_ATGCGATTCTGGTGTA-1 | GSM4626768 | Normal |
| GSM4626768_ATGGGAGAGAGTGACC-1 | GSM4626768 | Normal |
| GSM4626768_ATGGGAGAGGCAGTCA-1 | GSM4626768 | Normal |
| GSM4626768_ATGGGAGAGGGAAACA-1 | GSM4626768 | Normal |
| GSM4626768_ATGGGAGAGTACATGA-1 | GSM4626768 | Normal |
| GSM4626768_ATGGGAGCACGTTGGC-1 | GSM4626768 | Normal |
| GSM4626768_ATGGGAGCACTCGACG-1 | GSM4626768 | Normal |
| GSM4626768_ATGGGAGGTACCCAAT-1 | GSM4626768 | Normal |
| GSM4626768_ATGGGAGGTGATGTGG-1 | GSM4626768 | Normal |
| GSM4626768_ATGGGAGGTGCAGACA-1 | GSM4626768 | Normal |
| GSM4626768_ATGGGAGTCGTCCAGG-1 | GSM4626768 | Normal |
| GSM4626768_ATGGGAGTCGTGGTCG-1 | GSM4626768 | Normal |
| GSM4626768_ATGGGAGTCTCGCTTG-1 | GSM4626768 | Normal |
| GSM4626768_ATGTGTGAGAAACCTA-1 | GSM4626768 | Normal |
| GSM4626768_ATGTGTGAGAATTGTG-1 | GSM4626768 | Normal |
| GSM4626768_ATGTGTGAGGGAGTAA-1 | GSM4626768 | Normal |
| GSM4626768_ATGTGTGAGTGATCGG-1 | GSM4626768 | Normal |
| GSM4626768_ATGTGTGCAAAGAATC-1 | GSM4626768 | Normal |
| GSM4626768_ATGTGTGCAACCGCCA-1 | GSM4626768 | Normal |
| GSM4626768_ATGTGTGCAATACGCT-1 | GSM4626768 | Normal |
| GSM4626768_ATGTGTGCACCAACCG-1 | GSM4626768 | Normal |
| GSM4626768_ATGTGTGCACCCATTC-1 | GSM4626768 | Normal |
| GSM4626768_ATGTGTGCAGACGCTC-1 | GSM4626768 | Normal |
| GSM4626768_ATGTGTGCAGATGGCA-1 | GSM4626768 | Normal |
| GSM4626768_ATGTGTGGTGTCTGAT-1 | GSM4626768 | Normal |
| GSM4626768_ATGTGTGGTTACGTCA-1 | GSM4626768 | Normal |
| GSM4626768_ATGTGTGTCGCTGTT-1  | GSM4626768 | Normal |

|                                |            |        |
|--------------------------------|------------|--------|
| GSM4626768_ATTACTCAGAGTAATC-1  | GSM4626768 | Normal |
| GSM4626768_ATTACTCAGAGTGAGA-1  | GSM4626768 | Normal |
| GSM4626768_ATTACTCAGTACGATA-1  | GSM4626768 | Normal |
| GSM4626768_ATTACTCCAACACCCG-1  | GSM4626768 | Normal |
| GSM4626768_ATTACTCGTACCGCTG-1  | GSM4626768 | Normal |
| GSM4626768_ATTACTCGTCGACTGC-1  | GSM4626768 | Normal |
| GSM4626768_ATTACTCGTCGTTGTA-1  | GSM4626768 | Normal |
| GSM4626768_ATTACTCGTTCCAACA-1  | GSM4626768 | Normal |
| GSM4626768_ATTACTCGTTGATTTCG-1 | GSM4626768 | Normal |
| GSM4626768_ATTATCCAGATGCCAG-1  | GSM4626768 | Normal |
| GSM4626768_ATTATCCAGGACCACA-1  | GSM4626768 | Normal |
| GSM4626768_ATTATCCAGTGCCAGA-1  | GSM4626768 | Normal |
| GSM4626768_ATTATCCCAATGGATA-1  | GSM4626768 | Normal |
| GSM4626768_ATTATCCCACATTAGC-1  | GSM4626768 | Normal |
| GSM4626768_ATTATCCCAGGAACGT-1  | GSM4626768 | Normal |
| GSM4626768_ATTATCCCATCAGTAC-1  | GSM4626768 | Normal |
| GSM4626768_ATTATCCGTGTTTCGAT-1 | GSM4626768 | Normal |
| GSM4626768_ATTATCCTCGCCTGTT-1  | GSM4626768 | Normal |
| GSM4626768_ATTCTACCAATCGAAA-1  | GSM4626768 | Normal |
| GSM4626768_ATTCTACCAGACTCGC-1  | GSM4626768 | Normal |
| GSM4626768_ATTCTACCAGATGGGT-1  | GSM4626768 | Normal |
| GSM4626768_ATTCTACCATACGCCG-1  | GSM4626768 | Normal |
| GSM4626768_ATTCTACCATACTACG-1  | GSM4626768 | Normal |
| GSM4626768_ATTCTACCATGATCCA-1  | GSM4626768 | Normal |
| GSM4626768_ATTCTACGTACTCGCG-1  | GSM4626768 | Normal |
| GSM4626768_ATTCTACGTCAGCTAT-1  | GSM4626768 | Normal |
| GSM4626768_ATTCTACGTTGGTGGA-1  | GSM4626768 | Normal |
| GSM4626768_ATTCTACTCAACACAC-1  | GSM4626768 | Normal |
| GSM4626768_ATTCTACTCATGCAAC-1  | GSM4626768 | Normal |
| GSM4626768_ATTCTACTCCTGCTTG-1  | GSM4626768 | Normal |
| GSM4626768_ATTCTACTCCTGTAGA-1  | GSM4626768 | Normal |
| GSM4626768_ATTCTACTCTTTACAC-1  | GSM4626768 | Normal |
| GSM4626768_ATTGGACAGTGGCACA-1  | GSM4626768 | Normal |
| GSM4626768_ATTGGACCACAGACAG-1  | GSM4626768 | Normal |
| GSM4626768_ATTGGACCACCTCGTT-1  | GSM4626768 | Normal |
| GSM4626768_ATTGGACGTAATTGGA-1  | GSM4626768 | Normal |
| GSM4626768_ATTGGACGTAGCGTAG-1  | GSM4626768 | Normal |
| GSM4626768_ATTGGACGTGTAACGG-1  | GSM4626768 | Normal |
| GSM4626768_ATTGGACGTGTTTGTG-1  | GSM4626768 | Normal |
| GSM4626768_ATTGGACGTTGTCGCG-1  | GSM4626768 | Normal |
| GSM4626768_ATTGGACTCGTAGGAG-1  | GSM4626768 | Normal |
| GSM4626768_ATTGGTGAGCGTAATA-1  | GSM4626768 | Normal |
| GSM4626768_ATTGGTGCAAAGCAAT-1  | GSM4626768 | Normal |
| GSM4626768_ATTGGTGCAAGGGTCA-1  | GSM4626768 | Normal |
| GSM4626768_ATTGGTGGTCCAGTAT-1  | GSM4626768 | Normal |
| GSM4626768_ATTGGTGGTGCACGAA-1  | GSM4626768 | Normal |
| GSM4626768_ATTGGTGGTGCCTTGG-1  | GSM4626768 | Normal |
| GSM4626768_ATTGGTGGTGTGCCTG-1  | GSM4626768 | Normal |
| GSM4626768_ATTGGTGGTTTTGTGTG-1 | GSM4626768 | Normal |
| GSM4626768_ATTGGTGTGAGGCCCA-1  | GSM4626768 | Normal |
| GSM4626768_ATTTCTGAGATATGCA-1  | GSM4626768 | Normal |
| GSM4626768_ATTTCTGAGGGTGTTG-1  | GSM4626768 | Normal |
| GSM4626768_ATTTCTGCAACACGCC-1  | GSM4626768 | Normal |
| GSM4626768_ATTTCTGCAACTGGCC-1  | GSM4626768 | Normal |
| GSM4626768_ATTTCTGCACTTCGAA-1  | GSM4626768 | Normal |
| GSM4626768_ATTTCTGGTCTAACGT-1  | GSM4626768 | Normal |
| GSM4626768_ATTTCTGGTGATGATA-1  | GSM4626768 | Normal |

|                                |            |        |
|--------------------------------|------------|--------|
| GSM4626768_ATTTCTGGTTCGCTAA-1  | GSM4626768 | Normal |
| GSM4626768_ATTTCTGTCAACTCTT-1  | GSM4626768 | Normal |
| GSM4626768_ATTTCTGTCTGGCGAC-1  | GSM4626768 | Normal |
| GSM4626768_CAACCAAAGATCTGCT-1  | GSM4626768 | Normal |
| GSM4626768_CAACCAAAGGAGCGAG-1  | GSM4626768 | Normal |
| GSM4626768_CAACCAAAGGAGTCTG-1  | GSM4626768 | Normal |
| GSM4626768_CAACCAAAGGATTCCGG-1 | GSM4626768 | Normal |
| GSM4626768_CAACCAAAGGCCCTTG-1  | GSM4626768 | Normal |
| GSM4626768_CAACCAAAGTGGACGT-1  | GSM4626768 | Normal |
| GSM4626768_CAACCAACAAGACACG-1  | GSM4626768 | Normal |
| GSM4626768_CAACCAACACCATGTA-1  | GSM4626768 | Normal |
| GSM4626768_CAACCAACAGACGCTC-1  | GSM4626768 | Normal |
| GSM4626768_CAACCAAGTCATCCCT-1  | GSM4626768 | Normal |
| GSM4626768_CAACCAAGTCTAGCGC-1  | GSM4626768 | Normal |
| GSM4626768_CAACCAAGTGGTGTAG-1  | GSM4626768 | Normal |
| GSM4626768_CAACCAAGTGTCAATC-1  | GSM4626768 | Normal |
| GSM4626768_CAACCAATCAACACTG-1  | GSM4626768 | Normal |
| GSM4626768_CAACCTCAGCTAACTC-1  | GSM4626768 | Normal |
| GSM4626768_CAACCTCAGGTCATCT-1  | GSM4626768 | Normal |
| GSM4626768_CAACCTCCAGGACCCT-1  | GSM4626768 | Normal |
| GSM4626768_CAACCTCCATCTACGA-1  | GSM4626768 | Normal |
| GSM4626768_CAACCTCCATCTCCA-1   | GSM4626768 | Normal |
| GSM4626768_CAACCTCCATGAGCGA-1  | GSM4626768 | Normal |
| GSM4626768_CAACCTCGTACGAAAT-1  | GSM4626768 | Normal |
| GSM4626768_CAACCTCGTAGCGCAA-1  | GSM4626768 | Normal |
| GSM4626768_CAACCTCTCATTTGGG-1  | GSM4626768 | Normal |
| GSM4626768_CAACCTCTCCGTTGCT-1  | GSM4626768 | Normal |
| GSM4626768_CAACCTCTCTGCGGCA-1  | GSM4626768 | Normal |
| GSM4626768_CAACCTAGAGGCCGAAT-1 | GSM4626768 | Normal |
| GSM4626768_CAACCTAGAGTGTGAA-1  | GSM4626768 | Normal |
| GSM4626768_CAACCTAGCAGTTCATG-1 | GSM4626768 | Normal |
| GSM4626768_CAACCTAGCATGCGCAC-1 | GSM4626768 | Normal |
| GSM4626768_CAACCTAGGTCTAGGTT-1 | GSM4626768 | Normal |
| GSM4626768_CAACCTAGGTCTCTCTG-1 | GSM4626768 | Normal |
| GSM4626768_CAACCTAGTCAGAGACG-1 | GSM4626768 | Normal |
| GSM4626768_CAACCTAGTCATTTGGG-1 | GSM4626768 | Normal |
| GSM4626768_CAACCTAGTCCAAATGC-1 | GSM4626768 | Normal |
| GSM4626768_CAACCTAGTCGCCGTGA-1 | GSM4626768 | Normal |
| GSM4626768_CAACCTAGTCGGATGGA-1 | GSM4626768 | Normal |
| GSM4626768_CAAGAAAAGAGTACCG-1  | GSM4626768 | Normal |
| GSM4626768_CAAGAAAAGCAGGTCA-1  | GSM4626768 | Normal |
| GSM4626768_CAAGAAAAGCCGGTAA-1  | GSM4626768 | Normal |
| GSM4626768_CAAGAAAAGCTAGTCT-1  | GSM4626768 | Normal |
| GSM4626768_CAAGAAAAGCTGCAAG-1  | GSM4626768 | Normal |
| GSM4626768_CAAGAAAAGGTTCCCTA-1 | GSM4626768 | Normal |
| GSM4626768_CAAGAAAACAAGAAGAG-1 | GSM4626768 | Normal |
| GSM4626768_CAAGAAAAGTAACGACG-1 | GSM4626768 | Normal |
| GSM4626768_CAAGAAAAGTCGTGGCT-1 | GSM4626768 | Normal |
| GSM4626768_CAAGAAAAGTGCTAGCC-1 | GSM4626768 | Normal |
| GSM4626768_CAAGAAAAGTTGATTGC-1 | GSM4626768 | Normal |
| GSM4626768_CAAGAAAATCACATAGC-1 | GSM4626768 | Normal |
| GSM4626768_CAAGAAAATCCGAACGC-1 | GSM4626768 | Normal |
| GSM4626768_CAAGATCAGAGATGAG-1  | GSM4626768 | Normal |
| GSM4626768_CAAGATCAGAGTGAGA-1  | GSM4626768 | Normal |
| GSM4626768_CAAGATCAGTGGACGT-1  | GSM4626768 | Normal |
| GSM4626768_CAAGATCCAGAGCCAA-1  | GSM4626768 | Normal |
| GSM4626768_CAAGATCGTAGGAGTC-1  | GSM4626768 | Normal |

|                                |            |        |
|--------------------------------|------------|--------|
| GSM4626768_CAAGATCGTTAAAGAC-1  | GSM4626768 | Normal |
| GSM4626768_CAAGATCGTTGGTTTG-1  | GSM4626768 | Normal |
| GSM4626768_CAAGATCGTTGTGGCC-1  | GSM4626768 | Normal |
| GSM4626768_CAAGGCCAGATCCCAT-1  | GSM4626768 | Normal |
| GSM4626768_CAAGGCCAGCCAGTTT-1  | GSM4626768 | Normal |
| GSM4626768_CAAGGCCCAATCACAC-1  | GSM4626768 | Normal |
| GSM4626768_CAAGGCCCATACAGCT-1  | GSM4626768 | Normal |
| GSM4626768_CAAGGCCTCGCCCTTA-1  | GSM4626768 | Normal |
| GSM4626768_CAAGTTGAGTGCCATT-1  | GSM4626768 | Normal |
| GSM4626768_CAAGTTGCAAGCCATT-1  | GSM4626768 | Normal |
| GSM4626768_CAAGTTGCATTCTCAT-1  | GSM4626768 | Normal |
| GSM4626768_CAAGTTGGTAGCTTGT-1  | GSM4626768 | Normal |
| GSM4626768_CAAGTTGGTGATGCC-1   | GSM4626768 | Normal |
| GSM4626768_CAAGTTGGTTTGCATG-1  | GSM4626768 | Normal |
| GSM4626768_CACAAACAGGGTGTG-1   | GSM4626768 | Normal |
| GSM4626768_CACAAACCAATAGCGG-1  | GSM4626768 | Normal |
| GSM4626768_CACAAACCACTACAGT-1  | GSM4626768 | Normal |
| GSM4626768_CACAAACAGTCTTCC-1   | GSM4626768 | Normal |
| GSM4626768_CACAAACCATGTCTCC-1  | GSM4626768 | Normal |
| GSM4626768_CACAAACGTATAGGTA-1  | GSM4626768 | Normal |
| GSM4626768_CACAAACGTCCATGAT-1  | GSM4626768 | Normal |
| GSM4626768_CACAAACGTGATGCC-1   | GSM4626768 | Normal |
| GSM4626768_CACAAACTCCGCGCAA-1  | GSM4626768 | Normal |
| GSM4626768_CACAAACTCTTAGAGC-1  | GSM4626768 | Normal |
| GSM4626768_CACACAAAGAAGGACA-1  | GSM4626768 | Normal |
| GSM4626768_CACACAAAGCTACCGC-1  | GSM4626768 | Normal |
| GSM4626768_CACACAAAGGAGTCTG-1  | GSM4626768 | Normal |
| GSM4626768_CACACAACAACGATCT-1  | GSM4626768 | Normal |
| GSM4626768_CACACAACAATGACCT-1  | GSM4626768 | Normal |
| GSM4626768_CACACAACATGTTGAC-1  | GSM4626768 | Normal |
| GSM4626768_CACACAAGTCCTAGCG-1  | GSM4626768 | Normal |
| GSM4626768_CACACAAGTCGGCATC-1  | GSM4626768 | Normal |
| GSM4626768_CACACAAGTGATAAAC-1  | GSM4626768 | Normal |
| GSM4626768_CACACAAGTTCAGCGC-1  | GSM4626768 | Normal |
| GSM4626768_CACACAAGTTCTGAAC-1  | GSM4626768 | Normal |
| GSM4626768_CACACAATCAGGATCT-1  | GSM4626768 | Normal |
| GSM4626768_CACACCTAGATCCGAG-1  | GSM4626768 | Normal |
| GSM4626768_CACACCTCAAGCCAC-1   | GSM4626768 | Normal |
| GSM4626768_CACACCTGTATAGGGC-1  | GSM4626768 | Normal |
| GSM4626768_CACACCTTCCGCGGTA-1  | GSM4626768 | Normal |
| GSM4626768_CACACTCAGCGATCCC-1  | GSM4626768 | Normal |
| GSM4626768_CACACTCAGGGTTCGAT-1 | GSM4626768 | Normal |
| GSM4626768_CACACTCAGTCGTTTG-1  | GSM4626768 | Normal |
| GSM4626768_CACACTCCAAGTCTGTA-1 | GSM4626768 | Normal |
| GSM4626768_CACACTCCAAGGACTG-1  | GSM4626768 | Normal |
| GSM4626768_CACACTCGTACGACCC-1  | GSM4626768 | Normal |
| GSM4626768_CACACTCGTCCCGACA-1  | GSM4626768 | Normal |
| GSM4626768_CACACTCGTGACCAAG-1  | GSM4626768 | Normal |
| GSM4626768_CACACTCGTGACGCCT-1  | GSM4626768 | Normal |
| GSM4626768_CACACTCGTTCAGCGC-1  | GSM4626768 | Normal |
| GSM4626768_CACACTCTCAGTTTGG-1  | GSM4626768 | Normal |
| GSM4626768_CACAGGCAGATGGGTC-1  | GSM4626768 | Normal |
| GSM4626768_CACAGGCAGTTATCGC-1  | GSM4626768 | Normal |
| GSM4626768_CACAGGCCAAGAAAGG-1  | GSM4626768 | Normal |
| GSM4626768_CACAGGCCAATACGCT-1  | GSM4626768 | Normal |
| GSM4626768_CACAGGCCAGATGAGC-1  | GSM4626768 | Normal |
| GSM4626768_CACAGGCCAGCTCGCA-1  | GSM4626768 | Normal |

|                                |            |        |
|--------------------------------|------------|--------|
| GSM4626768_CACAGGCGTATTCGTG-1  | GSM4626768 | Normal |
| GSM4626768_CACAGGCGTCTAGCCG-1  | GSM4626768 | Normal |
| GSM4626768_CACAGGCGTTCGGGCT-1  | GSM4626768 | Normal |
| GSM4626768_CACAGGCGTTTAGCTG-1  | GSM4626768 | Normal |
| GSM4626768_CACAGTAAGGCTCATT-1  | GSM4626768 | Normal |
| GSM4626768_CACAGTAAGTCATGCT-1  | GSM4626768 | Normal |
| GSM4626768_CACAGTACAAATCCGT-1  | GSM4626768 | Normal |
| GSM4626768_CACAGTACACCCATGG-1  | GSM4626768 | Normal |
| GSM4626768_CACAGTAGTTCCATGA-1  | GSM4626768 | Normal |
| GSM4626768_CACAGTATCACATAGC-1  | GSM4626768 | Normal |
| GSM4626768_CACAGTATCCCTTGTG-1  | GSM4626768 | Normal |
| GSM4626768_CACAGTATCGGCGCAT-1  | GSM4626768 | Normal |
| GSM4626768_CACATAGAGCGAGAAA-1  | GSM4626768 | Normal |
| GSM4626768_CACATAGCAAGTCATC-1  | GSM4626768 | Normal |
| GSM4626768_CACATAGCAGGAATCG-1  | GSM4626768 | Normal |
| GSM4626768_CACATAGCATCCAACA-1  | GSM4626768 | Normal |
| GSM4626768_CACATAGCATCCTAGA-1  | GSM4626768 | Normal |
| GSM4626768_CACATAGGTAGGAGTC-1  | GSM4626768 | Normal |
| GSM4626768_CACATAGTCAGCACAT-1  | GSM4626768 | Normal |
| GSM4626768_CACATTTAGCAGCGTA-1  | GSM4626768 | Normal |
| GSM4626768_CACATTTAGCCTCGTG-1  | GSM4626768 | Normal |
| GSM4626768_CACATTTAGGATATAC-1  | GSM4626768 | Normal |
| GSM4626768_CACATTTAGGCCCTTG-1  | GSM4626768 | Normal |
| GSM4626768_CACATTTCAAACCTAC-1  | GSM4626768 | Normal |
| GSM4626768_CACATTTCACAGGAGT-1  | GSM4626768 | Normal |
| GSM4626768_CACATTTCACGAGAGT-1  | GSM4626768 | Normal |
| GSM4626768_CACATTTCAGATCTGT-1  | GSM4626768 | Normal |
| GSM4626768_CACATTTCAGTAAGAT-1  | GSM4626768 | Normal |
| GSM4626768_CACATTTCATGCATGT-1  | GSM4626768 | Normal |
| GSM4626768_CACATTTGTCAAGCGA-1  | GSM4626768 | Normal |
| GSM4626768_CACATTTGTCCGAGTC-1  | GSM4626768 | Normal |
| GSM4626768_CACATTTGTGCGATAG-1  | GSM4626768 | Normal |
| GSM4626768_CACATTTTCAACTCTT-1  | GSM4626768 | Normal |
| GSM4626768_CACATTTTCTAACGGT-1  | GSM4626768 | Normal |
| GSM4626768_CACCACTAGAGCTGGT-1  | GSM4626768 | Normal |
| GSM4626768_CACCACTAGCAGGTCA-1  | GSM4626768 | Normal |
| GSM4626768_CACCACTAGCTGGAAC-1  | GSM4626768 | Normal |
| GSM4626768_CACCACTAGGCTCTTA-1  | GSM4626768 | Normal |
| GSM4626768_CACCACTAGGGTTCCC-1  | GSM4626768 | Normal |
| GSM4626768_CACCACTAGTAATCCC-1  | GSM4626768 | Normal |
| GSM4626768_CACCACTCACACTGCG-1  | GSM4626768 | Normal |
| GSM4626768_CACCACTGTACCTACA-1  | GSM4626768 | Normal |
| GSM4626768_CACCACTGTACTCTCC-1  | GSM4626768 | Normal |
| GSM4626768_CACCACTGTGCGGTCT-1  | GSM4626768 | Normal |
| GSM4626768_CACCACTTCAACGAAA-1  | GSM4626768 | Normal |
| GSM4626768_CACCACTTCACTTAT-1   | GSM4626768 | Normal |
| GSM4626768_CACCACTTCCACGCAG-1  | GSM4626768 | Normal |
| GSM4626768_CACCACTTCCAGTATG-1  | GSM4626768 | Normal |
| GSM4626768_CACCACTTCCGAACGC-1  | GSM4626768 | Normal |
| GSM4626768_CACCACTTCTCAAGTG-1  | GSM4626768 | Normal |
| GSM4626768_CACCACTTCTGCGCA-1   | GSM4626768 | Normal |
| GSM4626768_CACCACTTCTGGCGAC-1  | GSM4626768 | Normal |
| GSM4626768_CACCAGGAGTTATCGC-1  | GSM4626768 | Normal |
| GSM4626768_CACCAGGGTTACGACT-1  | GSM4626768 | Normal |
| GSM4626768_CACCAGGGTTGCCTCT-1  | GSM4626768 | Normal |
| GSM4626768_CACCTTGAGAAACCAT-1  | GSM4626768 | Normal |
| GSM4626768_CACCTTGAGAAATGTTG-1 | GSM4626768 | Normal |



|                               |            |        |
|-------------------------------|------------|--------|
| GSM4626768_CACCTTGAGTCTCGGC-1 | GSM4626768 | Normal |
| GSM4626768_CACCTTGCACACCGAC-1 | GSM4626768 | Normal |
| GSM4626768_CACCTTGCACACGCTG-1 | GSM4626768 | Normal |
| GSM4626768_CACCTTGCACCAGGTC-1 | GSM4626768 | Normal |
| GSM4626768_CACCTTGCATGAACCT-1 | GSM4626768 | Normal |
| GSM4626768_CACCTTGGTAGGGACT-1 | GSM4626768 | Normal |
| GSM4626768_CACCTTGGTCGGCATC-1 | GSM4626768 | Normal |
| GSM4626768_CACCTTGTGCTAGCG-1  | GSM4626768 | Normal |
| GSM4626768_CACTCCAAGTTCGCGC-1 | GSM4626768 | Normal |
| GSM4626768_CACTCCAGTAGAAAGG-1 | GSM4626768 | Normal |
| GSM4626768_CACTCCAGTCCGCTGA-1 | GSM4626768 | Normal |
| GSM4626768_CACTCCAGTCCGTTAA-1 | GSM4626768 | Normal |
| GSM4626768_CACTCCAGTCGCCATG-1 | GSM4626768 | Normal |
| GSM4626768_CACTCCAGTTTGGCGC-1 | GSM4626768 | Normal |
| GSM4626768_CACTCCATCAGTTTGG-1 | GSM4626768 | Normal |
| GSM4626768_CAGAATCAGGCGCTCT-1 | GSM4626768 | Normal |
| GSM4626768_CAGAATCCAGATGGGT-1 | GSM4626768 | Normal |
| GSM4626768_CAGAATCCAGTTCATG-1 | GSM4626768 | Normal |
| GSM4626768_CAGAATCGTGAGGGTT-1 | GSM4626768 | Normal |
| GSM4626768_CAGAATCTCAGCTCTC-1 | GSM4626768 | Normal |
| GSM4626768_CAGAATCTCATGCATG-1 | GSM4626768 | Normal |
| GSM4626768_CAGAATCTCCGCGGTA-1 | GSM4626768 | Normal |
| GSM4626768_CAGAATCTCCTGTACC-1 | GSM4626768 | Normal |
| GSM4626768_CAGAATCTCCTTGCCA-1 | GSM4626768 | Normal |
| GSM4626768_CAGAATCTCGTTCCGG-1 | GSM4626768 | Normal |
| GSM4626768_CAGAGAGAGAAACGAG-1 | GSM4626768 | Normal |
| GSM4626768_CAGAGAGAGAATAGGG-1 | GSM4626768 | Normal |
| GSM4626768_CAGAGAGAGTTAGCGG-1 | GSM4626768 | Normal |
| GSM4626768_CAGAGAGCAAAGTGCG-1 | GSM4626768 | Normal |
| GSM4626768_CAGAGAGCAAGGGTCA-1 | GSM4626768 | Normal |
| GSM4626768_CAGAGAGCAATGCCAT-1 | GSM4626768 | Normal |
| GSM4626768_CAGAGAGCATTCTACT-1 | GSM4626768 | Normal |
| GSM4626768_CAGAGAGGTTCCACTC-1 | GSM4626768 | Normal |
| GSM4626768_CAGAGAGGTTTGACTG-1 | GSM4626768 | Normal |
| GSM4626768_CAGAGAGTCCCATTTA-1 | GSM4626768 | Normal |
| GSM4626768_CAGAGAGTCCGTCAA-1  | GSM4626768 | Normal |
| GSM4626768_CAGAGAGTCGACAGCC-1 | GSM4626768 | Normal |
| GSM4626768_CAGATCAAGAGGGCTT-1 | GSM4626768 | Normal |
| GSM4626768_CAGATCAAGATGTGGC-1 | GSM4626768 | Normal |
| GSM4626768_CAGATCAAGCACCGTC-1 | GSM4626768 | Normal |
| GSM4626768_CAGATCAAGGTGGGTT-1 | GSM4626768 | Normal |
| GSM4626768_CAGATCAAGTGCGATG-1 | GSM4626768 | Normal |
| GSM4626768_CAGATCACACGCATCG-1 | GSM4626768 | Normal |
| GSM4626768_CAGATCACAGTAGAGC-1 | GSM4626768 | Normal |
| GSM4626768_CAGATCAGTTCCAACA-1 | GSM4626768 | Normal |
| GSM4626768_CAGATCATCTCCAACC-1 | GSM4626768 | Normal |
| GSM4626768_CAGCAGCAGCTAAACA-1 | GSM4626768 | Normal |
| GSM4626768_CAGCAGCAGGACATTA-1 | GSM4626768 | Normal |
| GSM4626768_CAGCAGCCAAGTCTGT-1 | GSM4626768 | Normal |
| GSM4626768_CAGCAGCCATTCTGC-1  | GSM4626768 | Normal |
| GSM4626768_CAGCAGCGTCCGCTGA-1 | GSM4626768 | Normal |
| GSM4626768_CAGCAGCGTCTACCTC-1 | GSM4626768 | Normal |
| GSM4626768_CAGCAGCTCAGTTGAC-1 | GSM4626768 | Normal |
| GSM4626768_CAGCAGCTCCAGTATG-1 | GSM4626768 | Normal |
| GSM4626768_CAGCAGCTCCTATGTT-1 | GSM4626768 | Normal |
| GSM4626768_CAGCAGCTCTCGCTTG-1 | GSM4626768 | Normal |
| GSM4626768_CAGCATAAGTCCGTAT-1 | GSM4626768 | Normal |

|                                |            |        |
|--------------------------------|------------|--------|
| GSM4626768_CAGCATACAAGCTGGA-1  | GSM4626768 | Normal |
| GSM4626768_CAGCATACAGTAACGG-1  | GSM4626768 | Normal |
| GSM4626768_CAGCATAGTAATTGGA-1  | GSM4626768 | Normal |
| GSM4626768_CAGCATAGTACCATCA-1  | GSM4626768 | Normal |
| GSM4626768_CAGCATAGTACCGGCT-1  | GSM4626768 | Normal |
| GSM4626768_CAGCATATCAAACCGT-1  | GSM4626768 | Normal |
| GSM4626768_CAGCATATCGGTTCCGG-1 | GSM4626768 | Normal |
| GSM4626768_CAGCATATCTAACGGT-1  | GSM4626768 | Normal |
| GSM4626768_CAGCCGAAGCTAAACA-1  | GSM4626768 | Normal |
| GSM4626768_CAGCCGAAGCTGATAA-1  | GSM4626768 | Normal |
| GSM4626768_CAGCCGACACGGCCAT-1  | GSM4626768 | Normal |
| GSM4626768_CAGCCGACAGATGAGC-1  | GSM4626768 | Normal |
| GSM4626768_CAGCCGACATCAGTAC-1  | GSM4626768 | Normal |
| GSM4626768_CAGCCGAGTACACCGC-1  | GSM4626768 | Normal |
| GSM4626768_CAGCCGAGTCAGAGGT-1  | GSM4626768 | Normal |
| GSM4626768_CAGCCGAGTGTGGTTT-1  | GSM4626768 | Normal |
| GSM4626768_CAGCCGATCTCGTATT-1  | GSM4626768 | Normal |
| GSM4626768_CAGCGACAGATGCCTT-1  | GSM4626768 | Normal |
| GSM4626768_CAGCGACCACATCCGG-1  | GSM4626768 | Normal |
| GSM4626768_CAGCGACCATCGTCGG-1  | GSM4626768 | Normal |
| GSM4626768_CAGCGACCATGTCCTC-1  | GSM4626768 | Normal |
| GSM4626768_CAGCGACGTGAGGCTA-1  | GSM4626768 | Normal |
| GSM4626768_CAGCGACTCTCTGCTG-1  | GSM4626768 | Normal |
| GSM4626768_CAGCTAAAGCGCTCCA-1  | GSM4626768 | Normal |
| GSM4626768_CAGCTAAAGGTGGGTT-1  | GSM4626768 | Normal |
| GSM4626768_CAGCTAAAGTAGATGT-1  | GSM4626768 | Normal |
| GSM4626768_CAGCTAAAGTTTAGGA-1  | GSM4626768 | Normal |
| GSM4626768_CAGCTAACAAAGACACG-1 | GSM4626768 | Normal |
| GSM4626768_CAGCTAACAAATGCCAT-1 | GSM4626768 | Normal |
| GSM4626768_CAGCTAACACCAGCAC-1  | GSM4626768 | Normal |
| GSM4626768_CAGCTAACAGACGCCT-1  | GSM4626768 | Normal |
| GSM4626768_CAGCTAACAGTCCTTC-1  | GSM4626768 | Normal |
| GSM4626768_CAGCTAATCATTGCC-1   | GSM4626768 | Normal |
| GSM4626768_CAGCTAATCCAGATCA-1  | GSM4626768 | Normal |
| GSM4626768_CAGCTAATCTATGTGG-1  | GSM4626768 | Normal |
| GSM4626768_CAGCTAATCTTTCCTC-1  | GSM4626768 | Normal |
| GSM4626768_CAGCTGGCAAGCCCAC-1  | GSM4626768 | Normal |
| GSM4626768_CAGCTGGCATAAGACA-1  | GSM4626768 | Normal |
| GSM4626768_CAGCTGGCATAACATG-1  | GSM4626768 | Normal |
| GSM4626768_CAGCTGGCATAGAAAC-1  | GSM4626768 | Normal |
| GSM4626768_CAGCTGGGTACCCAAT-1  | GSM4626768 | Normal |
| GSM4626768_CAGCTGGGTCATCGGC-1  | GSM4626768 | Normal |
| GSM4626768_CAGCTGGGTCCAGTTA-1  | GSM4626768 | Normal |
| GSM4626768_CAGCTGGTCTGAATCCA-1 | GSM4626768 | Normal |
| GSM4626768_CAGCTGGTCTGACCGG-1  | GSM4626768 | Normal |
| GSM4626768_CAGCTGGTCTAAGCCA-1  | GSM4626768 | Normal |
| GSM4626768_CAGGTGCAGAAACCAT-1  | GSM4626768 | Normal |
| GSM4626768_CAGGTGCAGGTGTGGT-1  | GSM4626768 | Normal |
| GSM4626768_CAGGTGCCACATGACT-1  | GSM4626768 | Normal |
| GSM4626768_CAGGTGCGTAAGTGGC-1  | GSM4626768 | Normal |
| GSM4626768_CAGGTGCGTCCAGTTA-1  | GSM4626768 | Normal |
| GSM4626768_CAGGTGCGTGAAATCA-1  | GSM4626768 | Normal |
| GSM4626768_CAGGTGCGTTGGTGGA-1  | GSM4626768 | Normal |
| GSM4626768_CAGGTGCTCACATACG-1  | GSM4626768 | Normal |
| GSM4626768_CAGGTGCTCAGGCAAG-1  | GSM4626768 | Normal |
| GSM4626768_CAGGTGCTCAGTACGT-1  | GSM4626768 | Normal |
| GSM4626768_CAGGTGCTCTCTAGGA-1  | GSM4626768 | Normal |

|                                |            |        |
|--------------------------------|------------|--------|
| GSM4626768_CAGTAACCAGCTGCAC-1  | GSM4626768 | Normal |
| GSM4626768_CAGTAACCATGTAAGA-1  | GSM4626768 | Normal |
| GSM4626768_CAGTAACGTAGGCTGA-1  | GSM4626768 | Normal |
| GSM4626768_CAGTAACGTCAATGTC-1  | GSM4626768 | Normal |
| GSM4626768_CAGTAACTCAACGGCC-1  | GSM4626768 | Normal |
| GSM4626768_CAGTAACTCAATAAGG-1  | GSM4626768 | Normal |
| GSM4626768_CAGTAACTCGGTCTAA-1  | GSM4626768 | Normal |
| GSM4626768_CAGTCCTAGAGTTGGC-1  | GSM4626768 | Normal |
| GSM4626768_CAGTCCTAGCCCAGCT-1  | GSM4626768 | Normal |
| GSM4626768_CAGTCCTAGCTCCTTC-1  | GSM4626768 | Normal |
| GSM4626768_CAGTCCTAGTACGACG-1  | GSM4626768 | Normal |
| GSM4626768_CAGTCCTCAAAGAATC-1  | GSM4626768 | Normal |
| GSM4626768_CAGTCCTCACCATGTA-1  | GSM4626768 | Normal |
| GSM4626768_CAGTCCTGTGTCTGAT-1  | GSM4626768 | Normal |
| GSM4626768_CAGTCCTTCACGGTTA-1  | GSM4626768 | Normal |
| GSM4626768_CAGTCCTTCATATCGG-1  | GSM4626768 | Normal |
| GSM4626768_CAGTCCTTCCATTCTA-1  | GSM4626768 | Normal |
| GSM4626768_CAGTCCTTCTCCCTGA-1  | GSM4626768 | Normal |
| GSM4626768_CAGTCCTTCTTGCATT-1  | GSM4626768 | Normal |
| GSM4626768_CATATGGAGCTGCGAA-1  | GSM4626768 | Normal |
| GSM4626768_CATATGGAGCTGTCTA-1  | GSM4626768 | Normal |
| GSM4626768_CATATGGAGTGAACGC-1  | GSM4626768 | Normal |
| GSM4626768_CATATGGCAATCCGAT-1  | GSM4626768 | Normal |
| GSM4626768_CATATGGCAGATGGGT-1  | GSM4626768 | Normal |
| GSM4626768_CATATGGCAGCAGTTT-1  | GSM4626768 | Normal |
| GSM4626768_CATATGGCAGTTAACC-1  | GSM4626768 | Normal |
| GSM4626768_CATATGGGTCAAAGAT-1  | GSM4626768 | Normal |
| GSM4626768_CATATGGGTTCATGCCG-1 | GSM4626768 | Normal |
| GSM4626768_CATATGGGTGGCTCCA-1  | GSM4626768 | Normal |
| GSM4626768_CATATGGGTTTAGGAA-1  | GSM4626768 | Normal |
| GSM4626768_CATATGGTCCAGATGT-1  | GSM4626768 | Normal |
| GSM4626768_CATATGGTCCCTTAATC-1 | GSM4626768 | Normal |
| GSM4626768_CATATTCAGGATGCGT-1  | GSM4626768 | Normal |
| GSM4626768_CATATTCAGTAGGTGC-1  | GSM4626768 | Normal |
| GSM4626768_CATATTCACGAAACG-1   | GSM4626768 | Normal |
| GSM4626768_CATATTCAGTTCATG-1   | GSM4626768 | Normal |
| GSM4626768_CATATTCGTCTCTTAT-1  | GSM4626768 | Normal |
| GSM4626768_CATATTCGTTGGTGGA-1  | GSM4626768 | Normal |
| GSM4626768_CATCAAGAGATCGGGT-1  | GSM4626768 | Normal |
| GSM4626768_CATCAAGAGGTGGGTT-1  | GSM4626768 | Normal |
| GSM4626768_CATCAAGCACGTGAGA-1  | GSM4626768 | Normal |
| GSM4626768_CATCAAGCACTTAAGC-1  | GSM4626768 | Normal |
| GSM4626768_CATCAAGCAGCCACCA-1  | GSM4626768 | Normal |
| GSM4626768_CATCAAGGTACAGCAG-1  | GSM4626768 | Normal |
| GSM4626768_CATCAAGGTCGCATAT-1  | GSM4626768 | Normal |
| GSM4626768_CATCAAGGTGCGAAAC-1  | GSM4626768 | Normal |
| GSM4626768_CATCAAGGTTTGTTC-1   | GSM4626768 | Normal |
| GSM4626768_CATCAAGTCAACGGGA-1  | GSM4626768 | Normal |
| GSM4626768_CATCAAGTCTGCCCTA-1  | GSM4626768 | Normal |
| GSM4626768_CATCAGAAGGCTAGAC-1  | GSM4626768 | Normal |
| GSM4626768_CATCAGAAGGGATACC-1  | GSM4626768 | Normal |
| GSM4626768_CATCAGAAGTGTTAGA-1  | GSM4626768 | Normal |
| GSM4626768_CATCAGACACTTGGAT-1  | GSM4626768 | Normal |
| GSM4626768_CATCAGACAGGAATCG-1  | GSM4626768 | Normal |
| GSM4626768_CATCAGAGTAGGGTAC-1  | GSM4626768 | Normal |
| GSM4626768_CATCAGAGTCGAATCT-1  | GSM4626768 | Normal |
| GSM4626768_CATCAGAGTGCAGGTA-1  | GSM4626768 | Normal |

|                                |            |        |
|--------------------------------|------------|--------|
| GSM4626768_CATCAGAGTTTGCATG-1  | GSM4626768 | Normal |
| GSM4626768_CATCAGATCAAGGCTT-1  | GSM4626768 | Normal |
| GSM4626768_CATCAGATCCGTAGTA-1  | GSM4626768 | Normal |
| GSM4626768_CATCAGATCTTAGCCC-1  | GSM4626768 | Normal |
| GSM4626768_CATCCACAGACTAAGT-1  | GSM4626768 | Normal |
| GSM4626768_CATCCACAGAGCTGCA-1  | GSM4626768 | Normal |
| GSM4626768_CATCCACAGCGTCTAT-1  | GSM4626768 | Normal |
| GSM4626768_CATCCACCAAGCCATT-1  | GSM4626768 | Normal |
| GSM4626768_CATCCACCAAGCCTAT-1  | GSM4626768 | Normal |
| GSM4626768_CATCCACCACTGTTAG-1  | GSM4626768 | Normal |
| GSM4626768_CATCCACCATGCCTTC-1  | GSM4626768 | Normal |
| GSM4626768_CATCCACGTAAATACG-1  | GSM4626768 | Normal |
| GSM4626768_CATCCACGTATAAACG-1  | GSM4626768 | Normal |
| GSM4626768_CATCCACGTTCTGTTT-1  | GSM4626768 | Normal |
| GSM4626768_CATCCACTCAACACGT-1  | GSM4626768 | Normal |
| GSM4626768_CATCCACTCAACGGGA-1  | GSM4626768 | Normal |
| GSM4626768_CATCCACTCATTATCC-1  | GSM4626768 | Normal |
| GSM4626768_CATCCACTCTAAGCCA-1  | GSM4626768 | Normal |
| GSM4626768_CATCGAAAGAAGATTC-1  | GSM4626768 | Normal |
| GSM4626768_CATCGAAAGTGAAGAG-1  | GSM4626768 | Normal |
| GSM4626768_CATCGAAAGTTTCGATC-1 | GSM4626768 | Normal |
| GSM4626768_CATCGAACAAAGCGAGT-1 | GSM4626768 | Normal |
| GSM4626768_CATCGAACAAAGTTGTC-1 | GSM4626768 | Normal |
| GSM4626768_CATCGAACACAGCCCA-1  | GSM4626768 | Normal |
| GSM4626768_CATCGAACAGCGTTCG-1  | GSM4626768 | Normal |
| GSM4626768_CATCGAACAGTCGTGC-1  | GSM4626768 | Normal |
| GSM4626768_CATCGAAGTGATAAGT-1  | GSM4626768 | Normal |
| GSM4626768_CATCGAAGTTCTGTTT-1  | GSM4626768 | Normal |
| GSM4626768_CATCGAATCGCTGATA-1  | GSM4626768 | Normal |
| GSM4626768_CATCGAATCGGTGTCG-1  | GSM4626768 | Normal |
| GSM4626768_CATCGAATCTGGCCA-1   | GSM4626768 | Normal |
| GSM4626768_CATCGAATCTTAACCT-1  | GSM4626768 | Normal |
| GSM4626768_CATCGGGAGAGGTACC-1  | GSM4626768 | Normal |
| GSM4626768_CATCGGGAGCACCGCT-1  | GSM4626768 | Normal |
| GSM4626768_CATCGGGAGGGCTCTC-1  | GSM4626768 | Normal |
| GSM4626768_CATCGGGCAAACCTAC-1  | GSM4626768 | Normal |
| GSM4626768_CATCGGGCAAACGCGA-1  | GSM4626768 | Normal |
| GSM4626768_CATCGGGCAATGGACG-1  | GSM4626768 | Normal |
| GSM4626768_CATCGGGCACCAAGGCT-1 | GSM4626768 | Normal |
| GSM4626768_CATCGGGCATAACCGG-1  | GSM4626768 | Normal |
| GSM4626768_CATCGGGGTATGAATG-1  | GSM4626768 | Normal |
| GSM4626768_CATCGGGGTCTAGGTT-1  | GSM4626768 | Normal |
| GSM4626768_CATCGGGGTGAGTGAC-1  | GSM4626768 | Normal |
| GSM4626768_CATCGGGGTTAAAGAC-1  | GSM4626768 | Normal |
| GSM4626768_CATCGGGGTTGTACAC-1  | GSM4626768 | Normal |
| GSM4626768_CATCGGGTCAACGCTA-1  | GSM4626768 | Normal |
| GSM4626768_CATCGGGTCGCCATAA-1  | GSM4626768 | Normal |
| GSM4626768_CATCGGGTCGGAATCT-1  | GSM4626768 | Normal |
| GSM4626768_CATCGGGTCTACCAGA-1  | GSM4626768 | Normal |
| GSM4626768_CATCGGGTCTGGAGCC-1  | GSM4626768 | Normal |
| GSM4626768_CATGACAAGGGTTCGAT-1 | GSM4626768 | Normal |
| GSM4626768_CATGACAAGTGTTTGC-1  | GSM4626768 | Normal |
| GSM4626768_CATGACAAGTTACCCA-1  | GSM4626768 | Normal |
| GSM4626768_CATGACACAACACCTA-1  | GSM4626768 | Normal |
| GSM4626768_CATGACACAAGCCGTC-1  | GSM4626768 | Normal |
| GSM4626768_CATGACACAAGGTTTC-1  | GSM4626768 | Normal |
| GSM4626768_CATGACACAGACGCAA-1  | GSM4626768 | Normal |

|                                |            |        |
|--------------------------------|------------|--------|
| GSM4626768_CATGACACAGCTCCGA-1  | GSM4626768 | Normal |
| GSM4626768_CATGACAGTAAGAGGA-1  | GSM4626768 | Normal |
| GSM4626768_CATGACAGTCAGGACA-1  | GSM4626768 | Normal |
| GSM4626768_CATGACAGTTGAGGTG-1  | GSM4626768 | Normal |
| GSM4626768_CATGCCTAGAGGTACC-1  | GSM4626768 | Normal |
| GSM4626768_CATGCCTAGGTAGCCA-1  | GSM4626768 | Normal |
| GSM4626768_CATGCCTAGTGCGATG-1  | GSM4626768 | Normal |
| GSM4626768_CATGCCTCAAAGCGGT-1  | GSM4626768 | Normal |
| GSM4626768_CATGCCTACCAACCG-1   | GSM4626768 | Normal |
| GSM4626768_CATGCCTGTCCGCACT-1  | GSM4626768 | Normal |
| GSM4626768_CATGCCTGTCTGCGGT-1  | GSM4626768 | Normal |
| GSM4626768_CATGCCTTCAACGGCC-1  | GSM4626768 | Normal |
| GSM4626768_CATGCCTTCAAAACC-1   | GSM4626768 | Normal |
| GSM4626768_CATGCCTTCATCGGAT-1  | GSM4626768 | Normal |
| GSM4626768_CATGCCTTCTGCGCA-1   | GSM4626768 | Normal |
| GSM4626768_CATGGCGAGCGTAATA-1  | GSM4626768 | Normal |
| GSM4626768_CATGGCGCAGACACTT-1  | GSM4626768 | Normal |
| GSM4626768_CATGGCGCATGAACCT-1  | GSM4626768 | Normal |
| GSM4626768_CATGGCGCATGTTGAC-1  | GSM4626768 | Normal |
| GSM4626768_CATGGCGGTAGGCTGA-1  | GSM4626768 | Normal |
| GSM4626768_CATGGCGGTCCGAGTC-1  | GSM4626768 | Normal |
| GSM4626768_CATGGCGTCCCGACTT-1  | GSM4626768 | Normal |
| GSM4626768_CATGGCGTCCCGGATG-1  | GSM4626768 | Normal |
| GSM4626768_CATGGCGTCTGGGCA-1   | GSM4626768 | Normal |
| GSM4626768_CATTATCAGAATGTTG-1  | GSM4626768 | Normal |
| GSM4626768_CATTATCAGACGCTTT-1  | GSM4626768 | Normal |
| GSM4626768_CATTATCAGCCCTAAT-1  | GSM4626768 | Normal |
| GSM4626768_CATTATCAGTACGTAA-1  | GSM4626768 | Normal |
| GSM4626768_CATTATCCAAGAATC-1   | GSM4626768 | Normal |
| GSM4626768_CATTATCCATTAACCG-1  | GSM4626768 | Normal |
| GSM4626768_CATTATCGTTCGAGATG-1 | GSM4626768 | Normal |
| GSM4626768_CATTATCGTTGTTTGG-1  | GSM4626768 | Normal |
| GSM4626768_CATTATCTCATAGCAC-1  | GSM4626768 | Normal |
| GSM4626768_CATTATCTCCTTTCTC-1  | GSM4626768 | Normal |
| GSM4626768_CATTATCTCGAGAACG-1  | GSM4626768 | Normal |
| GSM4626768_CATTATCTCGCCATAA-1  | GSM4626768 | Normal |
| GSM4626768_CATTATCTCTGCTGTC-1  | GSM4626768 | Normal |
| GSM4626768_CATTTCGAGAAGGACA-1  | GSM4626768 | Normal |
| GSM4626768_CATTTCGAGAGACTAT-1  | GSM4626768 | Normal |
| GSM4626768_CATTTCGCCAAGAGTCG-1 | GSM4626768 | Normal |
| GSM4626768_CATTTCGCCACATTTCT-1 | GSM4626768 | Normal |
| GSM4626768_CATTTCGCTCTGCCAG-1  | GSM4626768 | Normal |
| GSM4626768_CATTTCGCTCCCTCTTT-1 | GSM4626768 | Normal |
| GSM4626768_CCAATCCAGTATTGGA-1  | GSM4626768 | Normal |
| GSM4626768_CCAATCCAGTCCATAC-1  | GSM4626768 | Normal |
| GSM4626768_CCAATCCCAATGAATG-1  | GSM4626768 | Normal |
| GSM4626768_CCAATCCCACGCCAT-1   | GSM4626768 | Normal |
| GSM4626768_CCAATCCCATCACCT-1   | GSM4626768 | Normal |
| GSM4626768_CCAATCCGTCCAAGTT-1  | GSM4626768 | Normal |
| GSM4626768_CCAATCCGTGCAAAGC-1  | GSM4626768 | Normal |
| GSM4626768_CCAATCCGTTCCACTC-1  | GSM4626768 | Normal |
| GSM4626768_CCAATCCTCAGAGCTT-1  | GSM4626768 | Normal |
| GSM4626768_CCAATCCTCTGGAGCC-1  | GSM4626768 | Normal |
| GSM4626768_CCACCTACACCTCGTT-1  | GSM4626768 | Normal |
| GSM4626768_CCACCTACATACAGCT-1  | GSM4626768 | Normal |
| GSM4626768_CCACCTACATGCAATC-1  | GSM4626768 | Normal |
| GSM4626768_CCACCTACATGTAGTC-1  | GSM4626768 | Normal |

|                                |            |        |
|--------------------------------|------------|--------|
| GSM4626768_CCACCTAGTCGCATCG-1  | GSM4626768 | Normal |
| GSM4626768_CCACCTAGTGCAGTAG-1  | GSM4626768 | Normal |
| GSM4626768_CCACCTATCACTCTTA-1  | GSM4626768 | Normal |
| GSM4626768_CCACCTATCAGAAATG-1  | GSM4626768 | Normal |
| GSM4626768_CCACGGAAGGCAATTA-1  | GSM4626768 | Normal |
| GSM4626768_CCACGGACAGCGTTCG-1  | GSM4626768 | Normal |
| GSM4626768_CCACGGAGTCACCTAA-1  | GSM4626768 | Normal |
| GSM4626768_CCACGGAGTTATCGGT-1  | GSM4626768 | Normal |
| GSM4626768_CCACGGATCCATGAGT-1  | GSM4626768 | Normal |
| GSM4626768_CCACGGATCCCTTGCA-1  | GSM4626768 | Normal |
| GSM4626768_CCACGGATCCTATTCA-1  | GSM4626768 | Normal |
| GSM4626768_CCACGGATCGGAAACG-1  | GSM4626768 | Normal |
| GSM4626768_CCACTACAGGATTCGG-1  | GSM4626768 | Normal |
| GSM4626768_CCACTACAGTTACCCA-1  | GSM4626768 | Normal |
| GSM4626768_CCACTACCACAACGTT-1  | GSM4626768 | Normal |
| GSM4626768_CCACTACCAGAGCCAA-1  | GSM4626768 | Normal |
| GSM4626768_CCACTACGTAAGGATT-1  | GSM4626768 | Normal |
| GSM4626768_CCACTACGTTCGCATAT-1 | GSM4626768 | Normal |
| GSM4626768_CCACTACTCTCTTGAT-1  | GSM4626768 | Normal |
| GSM4626768_CCAGCGAAGTTAGCGG-1  | GSM4626768 | Normal |
| GSM4626768_CCAGCGACAAACTGCT-1  | GSM4626768 | Normal |
| GSM4626768_CCAGCGACAAGTTAAG-1  | GSM4626768 | Normal |
| GSM4626768_CCAGCGACACTTCGAA-1  | GSM4626768 | Normal |
| GSM4626768_CCAGCGATCACCCCTCA-1 | GSM4626768 | Normal |
| GSM4626768_CCAGCGATCTTGCCGT-1  | GSM4626768 | Normal |
| GSM4626768_CCATGTCAGAGAACAG-1  | GSM4626768 | Normal |
| GSM4626768_CCATGTCAGCCAGGAT-1  | GSM4626768 | Normal |
| GSM4626768_CCATGTCAGGAATTAC-1  | GSM4626768 | Normal |
| GSM4626768_CCATGTCAGGTAGCTG-1  | GSM4626768 | Normal |
| GSM4626768_CCATGTCCAGGTCTCG-1  | GSM4626768 | Normal |
| GSM4626768_CCATGTCTGACAGTTC-1  | GSM4626768 | Normal |
| GSM4626768_CCATGTCTGTTGAGG-1   | GSM4626768 | Normal |
| GSM4626768_CCATGTCTCATTGCC-1   | GSM4626768 | Normal |
| GSM4626768_CCATGTCTCGCAAGCC-1  | GSM4626768 | Normal |
| GSM4626768_CCATGTCTCGGCTTGG-1  | GSM4626768 | Normal |
| GSM4626768_CCATGTCTCGTGACAT-1  | GSM4626768 | Normal |
| GSM4626768_CCATTCGAGAAACGCC-1  | GSM4626768 | Normal |
| GSM4626768_CCATTCGAGAAATAGGG-1 | GSM4626768 | Normal |
| GSM4626768_CCATTCGAGACTGTAA-1  | GSM4626768 | Normal |
| GSM4626768_CCATTCGCATGCCCGA-1  | GSM4626768 | Normal |
| GSM4626768_CCATTCGGTCAGATAA-1  | GSM4626768 | Normal |
| GSM4626768_CCATTCGTCAACATAG-1  | GSM4626768 | Normal |
| GSM4626768_CCATTCGTCTCTAAGG-1  | GSM4626768 | Normal |
| GSM4626768_CCCAATCAGCAGCCTC-1  | GSM4626768 | Normal |
| GSM4626768_CCCAATCAGCTCAACT-1  | GSM4626768 | Normal |
| GSM4626768_CCCAATCAGTCCAGGA-1  | GSM4626768 | Normal |
| GSM4626768_CCCAATCCAATCGGTT-1  | GSM4626768 | Normal |
| GSM4626768_CCCAATCCATACTACG-1  | GSM4626768 | Normal |
| GSM4626768_CCCAATCCATGTAGTC-1  | GSM4626768 | Normal |
| GSM4626768_CCCAATCGTACCCAAT-1  | GSM4626768 | Normal |
| GSM4626768_CCCAATCGTATAAACG-1  | GSM4626768 | Normal |
| GSM4626768_CCCAATCTCATCTGTT-1  | GSM4626768 | Normal |
| GSM4626768_CCCAATCTCCGACTT-1   | GSM4626768 | Normal |
| GSM4626768_CCCAGTTAGACTCGGA-1  | GSM4626768 | Normal |
| GSM4626768_CCCAGTTAGGACATTA-1  | GSM4626768 | Normal |
| GSM4626768_CCCAGTTAGTAGATGT-1  | GSM4626768 | Normal |
| GSM4626768_CCCAGTTCAATCGAAA-1  | GSM4626768 | Normal |

|                                |            |        |
|--------------------------------|------------|--------|
| GSM4626768_CCCAGTTCACTGTTAG-1  | GSM4626768 | Normal |
| GSM4626768_CCCAGTTCATGTTCGAT-1 | GSM4626768 | Normal |
| GSM4626768_CCCAGTTTCTACTCAT-1  | GSM4626768 | Normal |
| GSM4626768_CCCATACAGACTTGAA-1  | GSM4626768 | Normal |
| GSM4626768_CCCATACAGATGGGTC-1  | GSM4626768 | Normal |
| GSM4626768_CCCATACAGTGCCATT-1  | GSM4626768 | Normal |
| GSM4626768_CCCATACCAAGACACG-1  | GSM4626768 | Normal |
| GSM4626768_CCCATACCAAGCCATT-1  | GSM4626768 | Normal |
| GSM4626768_CCCATACCAATCCGAT-1  | GSM4626768 | Normal |
| GSM4626768_CCCATACCAAGAGCCAA-1 | GSM4626768 | Normal |
| GSM4626768_CCCATACGTCCATGAT-1  | GSM4626768 | Normal |
| GSM4626768_CCCATACGTCCGACGT-1  | GSM4626768 | Normal |
| GSM4626768_CCCATACTCCTTTTCGG-1 | GSM4626768 | Normal |
| GSM4626768_CCCATACTCGGTGTTCG-1 | GSM4626768 | Normal |
| GSM4626768_CCCATACTCTCATTCA-1  | GSM4626768 | Normal |
| GSM4626768_CCCTCCTAGCGATGAC-1  | GSM4626768 | Normal |
| GSM4626768_CCCTCCTCAATCCAAC-1  | GSM4626768 | Normal |
| GSM4626768_CCCTCCTCATTTTCAGG-1 | GSM4626768 | Normal |
| GSM4626768_CCCTCCTGTAGCAAAT-1  | GSM4626768 | Normal |
| GSM4626768_CCCTCCTGTCCGTTAA-1  | GSM4626768 | Normal |
| GSM4626768_CCCTCCTGTCCGCTCA-1  | GSM4626768 | Normal |
| GSM4626768_CCCTCCTGTCTCCACT-1  | GSM4626768 | Normal |
| GSM4626768_CCCTCCTTCAGTTCGA-1  | GSM4626768 | Normal |
| GSM4626768_CCCTCCTTCCAAGCCG-1  | GSM4626768 | Normal |
| GSM4626768_CCCTCCTTCGATCCCT-1  | GSM4626768 | Normal |
| GSM4626768_CCCTCCTTCTAGCACA-1  | GSM4626768 | Normal |
| GSM4626768_CCGGGATAGAGGGCTT-1  | GSM4626768 | Normal |
| GSM4626768_CCGGGATAGCATCATC-1  | GSM4626768 | Normal |
| GSM4626768_CCGGGATCAAGCGATG-1  | GSM4626768 | Normal |
| GSM4626768_CCGGGATCAGGACCCT-1  | GSM4626768 | Normal |
| GSM4626768_CCGGGATCAGTGAGTG-1  | GSM4626768 | Normal |
| GSM4626768_CCGGGATCATCAGTAC-1  | GSM4626768 | Normal |
| GSM4626768_CCGGGATCATCGGTTA-1  | GSM4626768 | Normal |
| GSM4626768_CCGGGATCATGTCCCTC-1 | GSM4626768 | Normal |
| GSM4626768_CCGGGATGTGCCTGCA-1  | GSM4626768 | Normal |
| GSM4626768_CCGGGATGTTTAGGAA-1  | GSM4626768 | Normal |
| GSM4626768_CCGGTAGAGCGTGTCC-1  | GSM4626768 | Normal |
| GSM4626768_CCGGTAGAGGACGAAA-1  | GSM4626768 | Normal |
| GSM4626768_CCGGTAGCAAAGTCAA-1  | GSM4626768 | Normal |
| GSM4626768_CCGGTAGCAAGCCGTC-1  | GSM4626768 | Normal |
| GSM4626768_CCGGTAGCAAGTAATG-1  | GSM4626768 | Normal |
| GSM4626768_CCGGTAGGTAAGCACG-1  | GSM4626768 | Normal |
| GSM4626768_CCGGTAGGTACCCAAT-1  | GSM4626768 | Normal |
| GSM4626768_CCGGTAGGTGCACCAC-1  | GSM4626768 | Normal |
| GSM4626768_CCGTACTAGTGGTCCC-1  | GSM4626768 | Normal |
| GSM4626768_CCGTACTCAATGAATG-1  | GSM4626768 | Normal |
| GSM4626768_CCGTACTCACGATAG-1   | GSM4626768 | Normal |
| GSM4626768_CCGTACTCAGCTGTTA-1  | GSM4626768 | Normal |
| GSM4626768_CCGTACTGTTAAAGTG-1  | GSM4626768 | Normal |
| GSM4626768_CCGTACTTCTGGTTCC-1  | GSM4626768 | Normal |
| GSM4626768_CCGTACTTCTTGCAAT-1  | GSM4626768 | Normal |
| GSM4626768_CCGTGGACAATAGCGG-1  | GSM4626768 | Normal |
| GSM4626768_CCGTGGACAATGACCT-1  | GSM4626768 | Normal |
| GSM4626768_CCGTGGACACAGCGTC-1  | GSM4626768 | Normal |
| GSM4626768_CCGTGGAGTACGCTGC-1  | GSM4626768 | Normal |
| GSM4626768_CCGTGGAGTACTCTCC-1  | GSM4626768 | Normal |
| GSM4626768_CCGTGGAGTCATATGC-1  | GSM4626768 | Normal |

|                                |            |        |
|--------------------------------|------------|--------|
| GSM4626768_CCGTGGATCCTTGCCA-1  | GSM4626768 | Normal |
| GSM4626768_CCGTGGATCGCGTAGC-1  | GSM4626768 | Normal |
| GSM4626768_CCGTTCAAGCCCAGCT-1  | GSM4626768 | Normal |
| GSM4626768_CCGTTCAAGCGTAATA-1  | GSM4626768 | Normal |
| GSM4626768_CCGTTCAAGCGTTTAC-1  | GSM4626768 | Normal |
| GSM4626768_CCGTTCAAGGTGCACA-1  | GSM4626768 | Normal |
| GSM4626768_CCGTTCACAACTGTC-1   | GSM4626768 | Normal |
| GSM4626768_CCGTTCACACGAAGCA-1  | GSM4626768 | Normal |
| GSM4626768_CCGTTCACACGCGAAA-1  | GSM4626768 | Normal |
| GSM4626768_CCGTTCACATGATCCA-1  | GSM4626768 | Normal |
| GSM4626768_CCGTTCAGTATCTGCA-1  | GSM4626768 | Normal |
| GSM4626768_CCGTTCAGTTACGCGC-1  | GSM4626768 | Normal |
| GSM4626768_CCGTTCATCACATACG-1  | GSM4626768 | Normal |
| GSM4626768_CCGTTCATCAGGCGAA-1  | GSM4626768 | Normal |
| GSM4626768_CCTAAAGAGAAACCGC-1  | GSM4626768 | Normal |
| GSM4626768_CCTAAAGAGAAGCCCA-1  | GSM4626768 | Normal |
| GSM4626768_CCTAAAGAGCTAGTCT-1  | GSM4626768 | Normal |
| GSM4626768_CCTAAAGAGGACATTA-1  | GSM4626768 | Normal |
| GSM4626768_CCTAAAGAGGCATTGG-1  | GSM4626768 | Normal |
| GSM4626768_CCTAAAGAGTGTACTC-1  | GSM4626768 | Normal |
| GSM4626768_CCTAAAGCACCGCTAG-1  | GSM4626768 | Normal |
| GSM4626768_CCTAAAGCAGCTCCGA-1  | GSM4626768 | Normal |
| GSM4626768_CCTAAAGCAGGGTTAG-1  | GSM4626768 | Normal |
| GSM4626768_CCTAAAGCATCCAACA-1  | GSM4626768 | Normal |
| GSM4626768_CCTAAAGGTTACTGAC-1  | GSM4626768 | Normal |
| GSM4626768_CCTAAAGTCATCTGCC-1  | GSM4626768 | Normal |
| GSM4626768_CCTAAAGTCCAGAAGG-1  | GSM4626768 | Normal |
| GSM4626768_CCTAAAGTCCGTCATC-1  | GSM4626768 | Normal |
| GSM4626768_CCTAAAGTCGACGAA-1   | GSM4626768 | Normal |
| GSM4626768_CCTAAAGTCGCAAAC-1   | GSM4626768 | Normal |
| GSM4626768_CCTACACAGGTGGGTT-1  | GSM4626768 | Normal |
| GSM4626768_CCTACACAGTAAGTAC-1  | GSM4626768 | Normal |
| GSM4626768_CCTACACAGTGCCATT-1  | GSM4626768 | Normal |
| GSM4626768_CCTACACCAAGCGAGT-1  | GSM4626768 | Normal |
| GSM4626768_CCTACACCATCAGTCA-1  | GSM4626768 | Normal |
| GSM4626768_CCTACACGTACTTAGC-1  | GSM4626768 | Normal |
| GSM4626768_CCTACACGTGGTTTCA-1  | GSM4626768 | Normal |
| GSM4626768_CCTACACTCCATGAAC-1  | GSM4626768 | Normal |
| GSM4626768_CCTACACTCGTAGGTT-1  | GSM4626768 | Normal |
| GSM4626768_CCTACCAAGCCGTCGT-1  | GSM4626768 | Normal |
| GSM4626768_CCTACCACAGAGTGTG-1  | GSM4626768 | Normal |
| GSM4626768_CCTACCACAGCCAATT-1  | GSM4626768 | Normal |
| GSM4626768_CCTACCAGTATATGAG-1  | GSM4626768 | Normal |
| GSM4626768_CCTACCAGTCTTTCAT-1  | GSM4626768 | Normal |
| GSM4626768_CCTACCAGTTCACGGC-1  | GSM4626768 | Normal |
| GSM4626768_CCTACCATCTATCCTA-1  | GSM4626768 | Normal |
| GSM4626768_CCTAGCTAGGACACCA-1  | GSM4626768 | Normal |
| GSM4626768_CCTAGCTAGGAGTTGC-1  | GSM4626768 | Normal |
| GSM4626768_CCTAGCTAGGGTTCGAT-1 | GSM4626768 | Normal |
| GSM4626768_CCTAGCTAGTACGTTT-1  | GSM4626768 | Normal |
| GSM4626768_CCTAGCTAGTCTCGGC-1  | GSM4626768 | Normal |
| GSM4626768_CCTAGCTAGTGGGTTG-1  | GSM4626768 | Normal |
| GSM4626768_CCTAGCTCACATCCA-1   | GSM4626768 | Normal |
| GSM4626768_CCTAGCTCATGCTGGC-1  | GSM4626768 | Normal |
| GSM4626768_CCTAGCTGTACTCGCG-1  | GSM4626768 | Normal |
| GSM4626768_CCTAGCTTCAGCTCTC-1  | GSM4626768 | Normal |
| GSM4626768_CCTAGCTTCTCTAAGG-1  | GSM4626768 | Normal |



|                                |            |        |
|--------------------------------|------------|--------|
| GSM4626768_CCTAGCTTCTTGCAAG-1  | GSM4626768 | Normal |
| GSM4626768_CCTATTAGTACCGCTG-1  | GSM4626768 | Normal |
| GSM4626768_CCTATTATCCTGCTTG-1  | GSM4626768 | Normal |
| GSM4626768_CCTATTATCTGGTTC-1   | GSM4626768 | Normal |
| GSM4626768_CCTCAGTAGAGCTTCT-1  | GSM4626768 | Normal |
| GSM4626768_CCTCAGTAGAGTGAGA-1  | GSM4626768 | Normal |
| GSM4626768_CCTCAGTCAGACAAGC-1  | GSM4626768 | Normal |
| GSM4626768_CCTCAGTGTATCAGTC-1  | GSM4626768 | Normal |
| GSM4626768_CCTCAGTTCAGAGCTT-1  | GSM4626768 | Normal |
| GSM4626768_CCTCAGTTCCTCAATT-1  | GSM4626768 | Normal |
| GSM4626768_CCTCAGTTCCTTAATC-1  | GSM4626768 | Normal |
| GSM4626768_CCTCTGAAGAGGTACC-1  | GSM4626768 | Normal |
| GSM4626768_CCTCTGAAGATTACCC-1  | GSM4626768 | Normal |
| GSM4626768_CCTCTGAAGCGAGAAA-1  | GSM4626768 | Normal |
| GSM4626768_CCTCTGAAGTAGATGT-1  | GSM4626768 | Normal |
| GSM4626768_CCTCTGAAGTAGCCGA-1  | GSM4626768 | Normal |
| GSM4626768_CCTCTGACACATCCGG-1  | GSM4626768 | Normal |
| GSM4626768_CCTCTGACACATTCGA-1  | GSM4626768 | Normal |
| GSM4626768_CCTCTGACACCGCTAG-1  | GSM4626768 | Normal |
| GSM4626768_CCTCTGACAGCCAGAA-1  | GSM4626768 | Normal |
| GSM4626768_CCTCTGACAGGCAGTA-1  | GSM4626768 | Normal |
| GSM4626768_CCTCTGACAGTGACAG-1  | GSM4626768 | Normal |
| GSM4626768_CCTCTGAGTAACGCGA-1  | GSM4626768 | Normal |
| GSM4626768_CCTCTGAGTAGTGAAT-1  | GSM4626768 | Normal |
| GSM4626768_CCTCTGATCAGAGGTG-1  | GSM4626768 | Normal |
| GSM4626768_CCTCTGATCGGTCCGA-1  | GSM4626768 | Normal |
| GSM4626768_CCTTACGAGACCTTTG-1  | GSM4626768 | Normal |
| GSM4626768_CCTTACGAGCTGGAAC-1  | GSM4626768 | Normal |
| GSM4626768_CCTTACGCAAAGTCT-1   | GSM4626768 | Normal |
| GSM4626768_CCTTACGCACTTAAGC-1  | GSM4626768 | Normal |
| GSM4626768_CCTTACGCAAGCGATA-1  | GSM4626768 | Normal |
| GSM4626768_CCTTACGGTGTGGCC-1   | GSM4626768 | Normal |
| GSM4626768_CCTTACGTCATAGCAC-1  | GSM4626768 | Normal |
| GSM4626768_CCTTCCCAGACTAGGC-1  | GSM4626768 | Normal |
| GSM4626768_CCTTCCCAGGAGCGTT-1  | GSM4626768 | Normal |
| GSM4626768_CCTTCCCAGGGTTTCT-1  | GSM4626768 | Normal |
| GSM4626768_CCTTCCCAGTCAAGGC-1  | GSM4626768 | Normal |
| GSM4626768_CCTTCCCACAGCGTC-1   | GSM4626768 | Normal |
| GSM4626768_CCTTCCCACCAGCAC-1   | GSM4626768 | Normal |
| GSM4626768_CCTTCCCGTCAATGTC-1  | GSM4626768 | Normal |
| GSM4626768_CCTTCCCGTCCGACA-1   | GSM4626768 | Normal |
| GSM4626768_CCTTCCCTCGGTTCCGG-1 | GSM4626768 | Normal |
| GSM4626768_CCTTCGAAGAAGAAGC-1  | GSM4626768 | Normal |
| GSM4626768_CCTTCGAAGATGTGGC-1  | GSM4626768 | Normal |
| GSM4626768_CCTTCGAAGCTGATAA-1  | GSM4626768 | Normal |
| GSM4626768_CCTTCGAGTCATGCAT-1  | GSM4626768 | Normal |
| GSM4626768_CCTTCGAGTCTTCAAG-1  | GSM4626768 | Normal |
| GSM4626768_CCTTCGAGTTGTTTGG-1  | GSM4626768 | Normal |
| GSM4626768_CCTTCGATCAGTCCCT-1  | GSM4626768 | Normal |
| GSM4626768_CCTTCGATCCAAGTAC-1  | GSM4626768 | Normal |
| GSM4626768_CCTTCGATCTCTGTCTG-1 | GSM4626768 | Normal |
| GSM4626768_CCTTTCTAGCTGAACG-1  | GSM4626768 | Normal |
| GSM4626768_CCTTTCTAGTAGCCGA-1  | GSM4626768 | Normal |
| GSM4626768_CCTTTCTCAGCTGTAT-1  | GSM4626768 | Normal |
| GSM4626768_CCTTTCTCATAGAAAC-1  | GSM4626768 | Normal |
| GSM4626768_CCTTTCTCATCAGTCA-1  | GSM4626768 | Normal |
| GSM4626768_CCTTTCTCATCGATTG-1  | GSM4626768 | Normal |

|                                |            |        |
|--------------------------------|------------|--------|
| GSM4626768_CCTTTCTGTCCATCCT-1  | GSM4626768 | Normal |
| GSM4626768_CCTTTCTGTCCTCTTG-1  | GSM4626768 | Normal |
| GSM4626768_CCTTTCTGTTGATTTCG-1 | GSM4626768 | Normal |
| GSM4626768_CCTTTCTGTTGTGCGCG-1 | GSM4626768 | Normal |
| GSM4626768_CCTTTCTTCGTACCGG-1  | GSM4626768 | Normal |
| GSM4626768_CGAACATAGCCCGAAA-1  | GSM4626768 | Normal |
| GSM4626768_CGAACATGTAGCTTGT-1  | GSM4626768 | Normal |
| GSM4626768_CGAACATGTCTAGTGT-1  | GSM4626768 | Normal |
| GSM4626768_CGAACATGTGAAATCA-1  | GSM4626768 | Normal |
| GSM4626768_CGAACATGTGGCCCTA-1  | GSM4626768 | Normal |
| GSM4626768_CGAACATTCGCGATCG-1  | GSM4626768 | Normal |
| GSM4626768_CGAACATTCTTGCAAG-1  | GSM4626768 | Normal |
| GSM4626768_CGAACATTCTTTACGT-1  | GSM4626768 | Normal |
| GSM4626768_CGAATGTAGCAGCGTA-1  | GSM4626768 | Normal |
| GSM4626768_CGAATGTAGGAGCGAG-1  | GSM4626768 | Normal |
| GSM4626768_CGAATGTAGGCAAAGA-1  | GSM4626768 | Normal |
| GSM4626768_CGAATGTCAATCGGTT-1  | GSM4626768 | Normal |
| GSM4626768_CGAATGTCAGCCAATT-1  | GSM4626768 | Normal |
| GSM4626768_CGAATGTCAGCTGTAT-1  | GSM4626768 | Normal |
| GSM4626768_CGAATGTGTAATACG-1   | GSM4626768 | Normal |
| GSM4626768_CGAATGTGTACCGCTG-1  | GSM4626768 | Normal |
| GSM4626768_CGACCTTAGCTCCCAG-1  | GSM4626768 | Normal |
| GSM4626768_CGACCTTCAAGTTCT-1   | GSM4626768 | Normal |
| GSM4626768_CGACCTTCAGTATCTG-1  | GSM4626768 | Normal |
| GSM4626768_CGACCTTGTATAATGG-1  | GSM4626768 | Normal |
| GSM4626768_CGACCTTGTGTTGCGC-1  | GSM4626768 | Normal |
| GSM4626768_CGACCTTTCTCTTGAT-1  | GSM4626768 | Normal |
| GSM4626768_CGACTTCAGACTGGGT-1  | GSM4626768 | Normal |
| GSM4626768_CGACTTCAGATGCCAG-1  | GSM4626768 | Normal |
| GSM4626768_CGACTTCCACATCTTT-1  | GSM4626768 | Normal |
| GSM4626768_CGACTTCCACCATCCT-1  | GSM4626768 | Normal |
| GSM4626768_CGACTTCCATGCCACG-1  | GSM4626768 | Normal |
| GSM4626768_CGACTTCGTATAAACG-1  | GSM4626768 | Normal |
| GSM4626768_CGACTTCGTTATTCTC-1  | GSM4626768 | Normal |
| GSM4626768_CGACTTCGTTCAAGCC-1  | GSM4626768 | Normal |
| GSM4626768_CGACTTCTCACCGGGT-1  | GSM4626768 | Normal |
| GSM4626768_CGAGAAGAGCGTTAT-1   | GSM4626768 | Normal |
| GSM4626768_CGAGAAGAGGTAAACT-1  | GSM4626768 | Normal |
| GSM4626768_CGAGAAGAGTTCGCGC-1  | GSM4626768 | Normal |
| GSM4626768_CGAGAAGCACGTAAGG-1  | GSM4626768 | Normal |
| GSM4626768_CGAGAAGCATACTACG-1  | GSM4626768 | Normal |
| GSM4626768_CGAGAAGGTAAAGGAG-1  | GSM4626768 | Normal |
| GSM4626768_CGAGAAGGTGAAAGA-1   | GSM4626768 | Normal |
| GSM4626768_CGAGAAGGTGTAATGA-1  | GSM4626768 | Normal |
| GSM4626768_CGAGAAGTCGGTCCGA-1  | GSM4626768 | Normal |
| GSM4626768_CGAGAAGTCTGATTCT-1  | GSM4626768 | Normal |
| GSM4626768_CGAGCACAGCGAGAAA-1  | GSM4626768 | Normal |
| GSM4626768_CGAGCACAGTGGTCCC-1  | GSM4626768 | Normal |
| GSM4626768_CGAGCACCAAAGCAAT-1  | GSM4626768 | Normal |
| GSM4626768_CGAGCACACGGTTTA-1   | GSM4626768 | Normal |
| GSM4626768_CGAGCACAGGGAGAG-1   | GSM4626768 | Normal |
| GSM4626768_CGAGCACGTAATTGAC-1  | GSM4626768 | Normal |
| GSM4626768_CGAGCACGTGAAAGA-1   | GSM4626768 | Normal |
| GSM4626768_CGAGCACTCCGCAAGT-1  | GSM4626768 | Normal |
| GSM4626768_CGAGCACTCCGTCAAA-1  | GSM4626768 | Normal |
| GSM4626768_CGAGCACTCGTTTAGG-1  | GSM4626768 | Normal |
| GSM4626768_CGAGCCAAGAAACCTA-1  | GSM4626768 | Normal |

|                                |            |        |
|--------------------------------|------------|--------|
| GSM4626768_CGAGCCAAGAAGGCCT-1  | GSM4626768 | Normal |
| GSM4626768_CGAGCCAAGAGATGAG-1  | GSM4626768 | Normal |
| GSM4626768_CGAGCCAAGCTAGGCA-1  | GSM4626768 | Normal |
| GSM4626768_CGAGCCAAGCTGCCCA-1  | GSM4626768 | Normal |
| GSM4626768_CGAGCCAAGGCTCAGA-1  | GSM4626768 | Normal |
| GSM4626768_CGAGCCAAGGGAAACA-1  | GSM4626768 | Normal |
| GSM4626768_CGAGCCACAACCTGCGC-1 | GSM4626768 | Normal |
| GSM4626768_CGAGCCAGTAGCTTGT-1  | GSM4626768 | Normal |
| GSM4626768_CGAGCCAGTCATATCG-1  | GSM4626768 | Normal |
| GSM4626768_CGAGCCAGTTGTGGAG-1  | GSM4626768 | Normal |
| GSM4626768_CGAGCCATCAACCATG-1  | GSM4626768 | Normal |
| GSM4626768_CGAGCCATCACTCTTA-1  | GSM4626768 | Normal |
| GSM4626768_CGAGCCATCTACCAGA-1  | GSM4626768 | Normal |
| GSM4626768_CGATCGGAGACCCACC-1  | GSM4626768 | Normal |
| GSM4626768_CGATCGGAGATGTAAC-1  | GSM4626768 | Normal |
| GSM4626768_CGATCGGAGCTGTTCA-1  | GSM4626768 | Normal |
| GSM4626768_CGATCGGAGTCTTGCA-1  | GSM4626768 | Normal |
| GSM4626768_CGATCGGGTACAGCAG-1  | GSM4626768 | Normal |
| GSM4626768_CGATCGGGTGTGACCC-1  | GSM4626768 | Normal |
| GSM4626768_CGATCGGTCAAACAAG-1  | GSM4626768 | Normal |
| GSM4626768_CGATCGGTCCACGCAG-1  | GSM4626768 | Normal |
| GSM4626768_CGATCGGTTCGTACGGC-1 | GSM4626768 | Normal |
| GSM4626768_CGATCGGTCTGTTTAGG-1 | GSM4626768 | Normal |
| GSM4626768_CGATGGCAGAATTGTG-1  | GSM4626768 | Normal |
| GSM4626768_CGATGGCAGAGTGAGA-1  | GSM4626768 | Normal |
| GSM4626768_CGATGGCAGGAATGGA-1  | GSM4626768 | Normal |
| GSM4626768_CGATGGCAGTCGTTTG-1  | GSM4626768 | Normal |
| GSM4626768_CGATGGCAGTGGGCTA-1  | GSM4626768 | Normal |
| GSM4626768_CGATGGCGTACTCTCC-1  | GSM4626768 | Normal |
| GSM4626768_CGATGGCGTCAGATAA-1  | GSM4626768 | Normal |
| GSM4626768_CGATGGCGTGCCTGTG-1  | GSM4626768 | Normal |
| GSM4626768_CGATGGCGTGAAAGA-1   | GSM4626768 | Normal |
| GSM4626768_CGATGGCGTTGAACTC-1  | GSM4626768 | Normal |
| GSM4626768_CGATGGCTCACTATTC-1  | GSM4626768 | Normal |
| GSM4626768_CGATGGCTCAGCTCTC-1  | GSM4626768 | Normal |
| GSM4626768_CGATGGCTCCTACAGA-1  | GSM4626768 | Normal |
| GSM4626768_CGATGGCTCTTGAGGT-1  | GSM4626768 | Normal |
| GSM4626768_CGATGGCTCTTGTACT-1  | GSM4626768 | Normal |
| GSM4626768_CGATGTAAGACTCGGA-1  | GSM4626768 | Normal |
| GSM4626768_CGATGTAAGAGAGCTC-1  | GSM4626768 | Normal |
| GSM4626768_CGATGTAAGGAATGGA-1  | GSM4626768 | Normal |
| GSM4626768_CGATGTACAAGCCGCT-1  | GSM4626768 | Normal |
| GSM4626768_CGATGTACACAACGCC-1  | GSM4626768 | Normal |
| GSM4626768_CGATGTACAGTTCATG-1  | GSM4626768 | Normal |
| GSM4626768_CGATGTACATACTCTT-1  | GSM4626768 | Normal |
| GSM4626768_CGATGTAGTTACGCGC-1  | GSM4626768 | Normal |
| GSM4626768_CGATGTAGTTCTGGTA-1  | GSM4626768 | Normal |
| GSM4626768_CGATGTATCCCTAACC-1  | GSM4626768 | Normal |
| GSM4626768_CGATTGAAGATCCGAG-1  | GSM4626768 | Normal |
| GSM4626768_CGATTGAAGTGTGGCA-1  | GSM4626768 | Normal |
| GSM4626768_CGATTGACAGTATGCT-1  | GSM4626768 | Normal |
| GSM4626768_CGATTGAGTAAGTAGT-1  | GSM4626768 | Normal |
| GSM4626768_CGATTGATCAAGCCTA-1  | GSM4626768 | Normal |
| GSM4626768_CGATTGATCATAACGGT-1 | GSM4626768 | Normal |
| GSM4626768_CGCCAAGAGAAGGTGA-1  | GSM4626768 | Normal |
| GSM4626768_CGCCAAGAGAGTGAGA-1  | GSM4626768 | Normal |
| GSM4626768_CGCCAAGAGGCTCATT-1  | GSM4626768 | Normal |

|                                |            |        |
|--------------------------------|------------|--------|
| GSM4626768_CGCCAAGCACATTAGC-1  | GSM4626768 | Normal |
| GSM4626768_CGCCAAGCACTATCTT-1  | GSM4626768 | Normal |
| GSM4626768_CGCCAAGGTACAGACG-1  | GSM4626768 | Normal |
| GSM4626768_CGCCAAGGTTCGCATCG-1 | GSM4626768 | Normal |
| GSM4626768_CGCCAAGGTGAGTGAC-1  | GSM4626768 | Normal |
| GSM4626768_CGCCAAGTCCTTGCCA-1  | GSM4626768 | Normal |
| GSM4626768_CGCCAAGTCTTGCCGT-1  | GSM4626768 | Normal |
| GSM4626768_CGCGGTAAGCAAATCA-1  | GSM4626768 | Normal |
| GSM4626768_CGCGGTAAGTATGACA-1  | GSM4626768 | Normal |
| GSM4626768_CGCGGTAAGTTAAGTG-1  | GSM4626768 | Normal |
| GSM4626768_CGCGGTAAGTTGTCGT-1  | GSM4626768 | Normal |
| GSM4626768_CGCGGTAAGTTTCCTT-1  | GSM4626768 | Normal |
| GSM4626768_CGCGGTACAATACGCT-1  | GSM4626768 | Normal |
| GSM4626768_CGCGGTACATGTTCCC-1  | GSM4626768 | Normal |
| GSM4626768_CGCGGTAGTCAAGCGA-1  | GSM4626768 | Normal |
| GSM4626768_CGCGGTATCGCATGAT-1  | GSM4626768 | Normal |
| GSM4626768_CGCGTTTAGACGCAAC-1  | GSM4626768 | Normal |
| GSM4626768_CGCGTTTCATCTACGA-1  | GSM4626768 | Normal |
| GSM4626768_CGCGTTTGTTGGGACA-1  | GSM4626768 | Normal |
| GSM4626768_CGCGTTTTCTTGACC-1   | GSM4626768 | Normal |
| GSM4626768_CGCTATCAGTCCGTAT-1  | GSM4626768 | Normal |
| GSM4626768_CGCTATCCAATAAGCA-1  | GSM4626768 | Normal |
| GSM4626768_CGCTATCCAGGACCCT-1  | GSM4626768 | Normal |
| GSM4626768_CGCTATCGTAACGCGA-1  | GSM4626768 | Normal |
| GSM4626768_CGCTATCGTTTACTCT-1  | GSM4626768 | Normal |
| GSM4626768_CGCTATCTCACATACG-1  | GSM4626768 | Normal |
| GSM4626768_CGCTATCTCCGCATAA-1  | GSM4626768 | Normal |
| GSM4626768_CGCTATCTCCGCTGTT-1  | GSM4626768 | Normal |
| GSM4626768_CGCTATCTCTCTGCTG-1  | GSM4626768 | Normal |
| GSM4626768_CGCTATCTCTGAGTGT-1  | GSM4626768 | Normal |
| GSM4626768_CGCTATCTCTTACCTA-1  | GSM4626768 | Normal |
| GSM4626768_CGCTGGAAGAGCTGGT-1  | GSM4626768 | Normal |
| GSM4626768_CGCTGGAAGCCTTGAT-1  | GSM4626768 | Normal |
| GSM4626768_CGCTGGAAGGAGTTGC-1  | GSM4626768 | Normal |
| GSM4626768_CGCTGGAAGTAATCCC-1  | GSM4626768 | Normal |
| GSM4626768_CGCTGGAAGTGTCTCA-1  | GSM4626768 | Normal |
| GSM4626768_CGCTGGACATGCGCAC-1  | GSM4626768 | Normal |
| GSM4626768_CGCTGGAGTGTGACGA-1  | GSM4626768 | Normal |
| GSM4626768_CGCTGGAGTTAAGAAC-1  | GSM4626768 | Normal |
| GSM4626768_CGCTGGATCACTCTTA-1  | GSM4626768 | Normal |
| GSM4626768_CGCTGGATCAGTTCA-1   | GSM4626768 | Normal |
| GSM4626768_CGCTGGATCGTATCAG-1  | GSM4626768 | Normal |
| GSM4626768_CGCTTCAAGAATGTGT-1  | GSM4626768 | Normal |
| GSM4626768_CGCTTCAAGGCTACGA-1  | GSM4626768 | Normal |
| GSM4626768_CGCTTCAAGTACTTGC-1  | GSM4626768 | Normal |
| GSM4626768_CGCTTCACAAGGTGTG-1  | GSM4626768 | Normal |
| GSM4626768_CGCTTCACAGCCAATT-1  | GSM4626768 | Normal |
| GSM4626768_CGCTTCATCCCTAACC-1  | GSM4626768 | Normal |
| GSM4626768_CGGACACAGAAGGGTA-1  | GSM4626768 | Normal |
| GSM4626768_CGGACACCAGGCGATA-1  | GSM4626768 | Normal |
| GSM4626768_CGGACACCAGGGAGAG-1  | GSM4626768 | Normal |
| GSM4626768_CGGACACCATTTCAAGG-1 | GSM4626768 | Normal |
| GSM4626768_CGGACACTCACATAGC-1  | GSM4626768 | Normal |
| GSM4626768_CGGACACTCATGTCTT-1  | GSM4626768 | Normal |
| GSM4626768_CGGACACTCCTTCAAT-1  | GSM4626768 | Normal |
| GSM4626768_CGGACACTCTCCCTGA-1  | GSM4626768 | Normal |
| GSM4626768_CGGACACTCTGCAAGT-1  | GSM4626768 | Normal |

|                               |            |        |
|-------------------------------|------------|--------|
| GSM4626768_CGGACACTCTTCAACT-1 | GSM4626768 | Normal |
| GSM4626768_CGGACGTAGAGAACAG-1 | GSM4626768 | Normal |
| GSM4626768_CGGACGTCATATGCTG-1 | GSM4626768 | Normal |
| GSM4626768_CGGACGTCATGAGCGA-1 | GSM4626768 | Normal |
| GSM4626768_CGGACGTCATGGAATA-1 | GSM4626768 | Normal |
| GSM4626768_CGGACGTTGATGAGG-1  | GSM4626768 | Normal |
| GSM4626768_CGGACGTTGCTTGTC-1  | GSM4626768 | Normal |
| GSM4626768_CGGACGTTCTGCTGTC-1 | GSM4626768 | Normal |
| GSM4626768_CGGACGTTCTTCCTTC-1 | GSM4626768 | Normal |
| GSM4626768_CGGACTGAGGGAACGG-1 | GSM4626768 | Normal |
| GSM4626768_CGGACTGAGTGTACGG-1 | GSM4626768 | Normal |
| GSM4626768_CGGACTGCATCGACGC-1 | GSM4626768 | Normal |
| GSM4626768_CGGACTGGTAAGAGAG-1 | GSM4626768 | Normal |
| GSM4626768_CGGACTGGTCTCAACA-1 | GSM4626768 | Normal |
| GSM4626768_CGGACTGGTTCATGGT-1 | GSM4626768 | Normal |
| GSM4626768_CGGACTGGTTGCGCAC-1 | GSM4626768 | Normal |
| GSM4626768_CGGACTGTCATGTGGT-1 | GSM4626768 | Normal |
| GSM4626768_CGGACTGTCGCTTAGA-1 | GSM4626768 | Normal |
| GSM4626768_CGGAGCTAGATCTGAA-1 | GSM4626768 | Normal |
| GSM4626768_CGGAGCTAGGGCTTGA-1 | GSM4626768 | Normal |
| GSM4626768_CGGAGCTCAGAGTGTG-1 | GSM4626768 | Normal |
| GSM4626768_CGGAGCTCAGGGTTAG-1 | GSM4626768 | Normal |
| GSM4626768_CGGAGCTCATACTACG-1 | GSM4626768 | Normal |
| GSM4626768_CGGAGCTCATAGACTC-1 | GSM4626768 | Normal |
| GSM4626768_CGGAGCTCATCCGTGG-1 | GSM4626768 | Normal |
| GSM4626768_CGGAGCTGTAGAGTGC-1 | GSM4626768 | Normal |
| GSM4626768_CGGAGCTGTAGCTAAA-1 | GSM4626768 | Normal |
| GSM4626768_CGGAGCTGTTCCATGA-1 | GSM4626768 | Normal |
| GSM4626768_CGGAGCTTCAACACCA-1 | GSM4626768 | Normal |
| GSM4626768_CGGAGCTTCTAGAGTC-1 | GSM4626768 | Normal |
| GSM4626768_CGGAGCTTCTTGTCAT-1 | GSM4626768 | Normal |
| GSM4626768_CGGAGTCAGCTGCAAG-1 | GSM4626768 | Normal |
| GSM4626768_CGGAGTCAGGCGTACA-1 | GSM4626768 | Normal |
| GSM4626768_CGGAGTCCAAGCCATT-1 | GSM4626768 | Normal |
| GSM4626768_CGGAGTCGTAGAAGGA-1 | GSM4626768 | Normal |
| GSM4626768_CGGAGTCGTAGATTAG-1 | GSM4626768 | Normal |
| GSM4626768_CGGAGTCGTTATTCTC-1 | GSM4626768 | Normal |
| GSM4626768_CGGAGTCGTTCAACCA-1 | GSM4626768 | Normal |
| GSM4626768_CGGCTAGAGGTGCAAC-1 | GSM4626768 | Normal |
| GSM4626768_CGGCTAGGTAGCGTCC-1 | GSM4626768 | Normal |
| GSM4626768_CGGCTAGGTCCGTGAC-1 | GSM4626768 | Normal |
| GSM4626768_CGGCTAGGTGACAAAT-1 | GSM4626768 | Normal |
| GSM4626768_CGGCTAGGTGCACGAA-1 | GSM4626768 | Normal |
| GSM4626768_CGGCTAGGTTCACGGC-1 | GSM4626768 | Normal |
| GSM4626768_CGGCTAGTCAGCAACT-1 | GSM4626768 | Normal |
| GSM4626768_CGGCTAGTCAGCTCTC-1 | GSM4626768 | Normal |
| GSM4626768_CGGCTAGTCATCATT-1  | GSM4626768 | Normal |
| GSM4626768_CGGCTAGTCGATGAGG-1 | GSM4626768 | Normal |
| GSM4626768_CGGCTAGTCGGACAAG-1 | GSM4626768 | Normal |
| GSM4626768_CGGGTCACAGCGTAAG-1 | GSM4626768 | Normal |
| GSM4626768_CGGGTCACATATACCG-1 | GSM4626768 | Normal |
| GSM4626768_CGGGTCAGTCAGAATA-1 | GSM4626768 | Normal |
| GSM4626768_CGGGTCAGTGTGGTTT-1 | GSM4626768 | Normal |
| GSM4626768_CGGGTCATCGATCCCT-1 | GSM4626768 | Normal |
| GSM4626768_CGGTTAAAGACATAAC-1 | GSM4626768 | Normal |
| GSM4626768_CGGTTAAAGCTATGCT-1 | GSM4626768 | Normal |
| GSM4626768_CGGTTAACAGACTCGC-1 | GSM4626768 | Normal |

|                                |            |        |
|--------------------------------|------------|--------|
| GSM4626768_CGGTTAACATATGAGA-1  | GSM4626768 | Normal |
| GSM4626768_CGGTTAACATCGATTG-1  | GSM4626768 | Normal |
| GSM4626768_CGGTTAACATGGGACA-1  | GSM4626768 | Normal |
| GSM4626768_CGGTTAAGTAGATTAG-1  | GSM4626768 | Normal |
| GSM4626768_CGGTTAAGTGCAACTT-1  | GSM4626768 | Normal |
| GSM4626768_CGGTTAAGTGCCTGCA-1  | GSM4626768 | Normal |
| GSM4626768_CGGTTAAGTTGAGGTG-1  | GSM4626768 | Normal |
| GSM4626768_CGGTTAATCATTCACT-1  | GSM4626768 | Normal |
| GSM4626768_CGGTTAATCCAAACTG-1  | GSM4626768 | Normal |
| GSM4626768_CGTAGCGAGAACAATC-1  | GSM4626768 | Normal |
| GSM4626768_CGTAGCGAGCCTATGT-1  | GSM4626768 | Normal |
| GSM4626768_CGTAGCGCATATGAGA-1  | GSM4626768 | Normal |
| GSM4626768_CGTAGCGCATTGGGCC-1  | GSM4626768 | Normal |
| GSM4626768_CGTAGCGGTCTGCAAT-1  | GSM4626768 | Normal |
| GSM4626768_CGTAGCGGTCTGCGGT-1  | GSM4626768 | Normal |
| GSM4626768_CGTAGCGGTGATGTGG-1  | GSM4626768 | Normal |
| GSM4626768_CGTAGCGGTGTCCTCT-1  | GSM4626768 | Normal |
| GSM4626768_CGTAGCGTCACTTCAT-1  | GSM4626768 | Normal |
| GSM4626768_CGTAGCGTCAGTTAGC-1  | GSM4626768 | Normal |
| GSM4626768_CGTAGCGTCAGTTCGA-1  | GSM4626768 | Normal |
| GSM4626768_CGTAGGCAGCGTCAAG-1  | GSM4626768 | Normal |
| GSM4626768_CGTAGGCAGCTGTTCA-1  | GSM4626768 | Normal |
| GSM4626768_CGTAGGCCACGGTAAG-1  | GSM4626768 | Normal |
| GSM4626768_CGTAGGCCAGGGCATA-1  | GSM4626768 | Normal |
| GSM4626768_CGTAGGCCATGCTGGC-1  | GSM4626768 | Normal |
| GSM4626768_CGTAGGCGTTAAGATG-1  | GSM4626768 | Normal |
| GSM4626768_CGTAGGCTCAGTTAGC-1  | GSM4626768 | Normal |
| GSM4626768_CGTAGGCTCCCTCAGT-1  | GSM4626768 | Normal |
| GSM4626768_CGTAGGCTCCTCTAGC-1  | GSM4626768 | Normal |
| GSM4626768_CGTAGGCTCGCAAGCC-1  | GSM4626768 | Normal |
| GSM4626768_CGTCACTAGTGAATTG-1  | GSM4626768 | Normal |
| GSM4626768_CGTCACTCACCTATCC-1  | GSM4626768 | Normal |
| GSM4626768_CGTCACTCAGTCAGAG-1  | GSM4626768 | Normal |
| GSM4626768_CGTCACTCAGTCGATT-1  | GSM4626768 | Normal |
| GSM4626768_CGTCACTTCGGTGTTA-1  | GSM4626768 | Normal |
| GSM4626768_CGTCACTTCGTAGGAG-1  | GSM4626768 | Normal |
| GSM4626768_CGTCACTTCTCGTTTA-1  | GSM4626768 | Normal |
| GSM4626768_CGTCAGGAGTCCGGTC-1  | GSM4626768 | Normal |
| GSM4626768_CGTCAGGCAGATCTGT-1  | GSM4626768 | Normal |
| GSM4626768_CGTCAGGGTTACAGAA-1  | GSM4626768 | Normal |
| GSM4626768_CGTCAGGGTTCCTCCA-1  | GSM4626768 | Normal |
| GSM4626768_CGTCAGGTCACGAAGG-1  | GSM4626768 | Normal |
| GSM4626768_CGTCAGGTCGCCTGTT-1  | GSM4626768 | Normal |
| GSM4626768_CGTCAGGTCGTACCGG-1  | GSM4626768 | Normal |
| GSM4626768_CGTCAGGTCGTTTAGG-1  | GSM4626768 | Normal |
| GSM4626768_CGTCAGGTCCTTGAGGT-1 | GSM4626768 | Normal |
| GSM4626768_CGTCAGGTCCTTGATC-1  | GSM4626768 | Normal |
| GSM4626768_CGTCCATAGTCGAGTG-1  | GSM4626768 | Normal |
| GSM4626768_CGTCCATCAAAGCGGT-1  | GSM4626768 | Normal |
| GSM4626768_CGTCCATGTAGCCTCG-1  | GSM4626768 | Normal |
| GSM4626768_CGTCCATGTATCAGTC-1  | GSM4626768 | Normal |
| GSM4626768_CGTCCATGTATGCTTG-1  | GSM4626768 | Normal |
| GSM4626768_CGTCCATGTGTGCCTG-1  | GSM4626768 | Normal |
| GSM4626768_CGTCTACAGAGTGACC-1  | GSM4626768 | Normal |
| GSM4626768_CGTCTACGTCAAAGAT-1  | GSM4626768 | Normal |
| GSM4626768_CGTCTACGTATCGGC-1   | GSM4626768 | Normal |
| GSM4626768_CGTCTACGTGACGCCT-1  | GSM4626768 | Normal |

|                               |            |        |
|-------------------------------|------------|--------|
| GSM4626768_CGTCTACGTGTAACGG-1 | GSM4626768 | Normal |
| GSM4626768_CGTCTACGTTGATTGC-1 | GSM4626768 | Normal |
| GSM4626768_CGTCTACTCAAAGTAG-1 | GSM4626768 | Normal |
| GSM4626768_CGTCTACTCATATCGG-1 | GSM4626768 | Normal |
| GSM4626768_CGTCTACTCCAGAGGA-1 | GSM4626768 | Normal |
| GSM4626768_CGTGAGCAGCACCGCT-1 | GSM4626768 | Normal |
| GSM4626768_CGTGAGCAGGATGTAT-1 | GSM4626768 | Normal |
| GSM4626768_CGTGAGCCATTCCTCG-1 | GSM4626768 | Normal |
| GSM4626768_CGTGAGCTCCGCAGTG-1 | GSM4626768 | Normal |
| GSM4626768_CGTGAGCTCGGAAACG-1 | GSM4626768 | Normal |
| GSM4626768_CGTGTAAAGCGAGAAA-1 | GSM4626768 | Normal |
| GSM4626768_CGTGTAAAGCTAACTC-1 | GSM4626768 | Normal |
| GSM4626768_CGTGTAAAGGCGCTCT-1 | GSM4626768 | Normal |
| GSM4626768_CGTGTAAAGTCTCCTC-1 | GSM4626768 | Normal |
| GSM4626768_CGTGTAAAGTGTGAAT-1 | GSM4626768 | Normal |
| GSM4626768_CGTGTAAGTGGTCTCG-1 | GSM4626768 | Normal |
| GSM4626768_CGTGTAATCCTCGCAT-1 | GSM4626768 | Normal |
| GSM4626768_CGTGTAATCTTTAGTC-1 | GSM4626768 | Normal |
| GSM4626768_CGTGTCTAGGGAACGG-1 | GSM4626768 | Normal |
| GSM4626768_CGTGTCTCAACACGCC-1 | GSM4626768 | Normal |
| GSM4626768_CGTGTCTCAATGCCAT-1 | GSM4626768 | Normal |
| GSM4626768_CGTGTCTCACCATCCT-1 | GSM4626768 | Normal |
| GSM4626768_CGTGTCTGTGGTCCGT-1 | GSM4626768 | Normal |
| GSM4626768_CGTGTCTGTAAAGTAG-1 | GSM4626768 | Normal |
| GSM4626768_CGTGTCTGTTCCATGA-1 | GSM4626768 | Normal |
| GSM4626768_CGTGTCTTCCTGCTTG-1 | GSM4626768 | Normal |
| GSM4626768_CGTGTCTTCGGCGCAT-1 | GSM4626768 | Normal |
| GSM4626768_CGTTAGAAGATGAGAG-1 | GSM4626768 | Normal |
| GSM4626768_CGTTAGAAGCCACGTC-1 | GSM4626768 | Normal |
| GSM4626768_CGTTAGACAAACGTGG-1 | GSM4626768 | Normal |
| GSM4626768_CGTTAGACAATCTACG-1 | GSM4626768 | Normal |
| GSM4626768_CGTTAGACAGGCGATA-1 | GSM4626768 | Normal |
| GSM4626768_CGTTAGACATCGGTTA-1 | GSM4626768 | Normal |
| GSM4626768_CGTTAGACATGGTCTA-1 | GSM4626768 | Normal |
| GSM4626768_CGTTAGAGTAATTGGA-1 | GSM4626768 | Normal |
| GSM4626768_CGTTAGAGTAGCCTCG-1 | GSM4626768 | Normal |
| GSM4626768_CGTTAGAGTCACCCAG-1 | GSM4626768 | Normal |
| GSM4626768_CGTTAGATCCAAACAC-1 | GSM4626768 | Normal |
| GSM4626768_CGTTCTGCAACTGCGC-1 | GSM4626768 | Normal |
| GSM4626768_CGTTCTGCAGCGTAAG-1 | GSM4626768 | Normal |
| GSM4626768_CGTTCTGGTGACGGTA-1 | GSM4626768 | Normal |
| GSM4626768_CGTTCTGGTGTTCTTT-1 | GSM4626768 | Normal |
| GSM4626768_CGTTCTGGTTATCGGT-1 | GSM4626768 | Normal |
| GSM4626768_CGTTCTGTCATACGGT-1 | GSM4626768 | Normal |
| GSM4626768_CGTTCTGTCATAGCAC-1 | GSM4626768 | Normal |
| GSM4626768_CGTTCTGTCCGTTGTC-1 | GSM4626768 | Normal |
| GSM4626768_CGTTCTGTCCGTCAGG-1 | GSM4626768 | Normal |
| GSM4626768_CGTTCTGTCTCGTATT-1 | GSM4626768 | Normal |
| GSM4626768_CGTTCTGTCTGAGTGT-1 | GSM4626768 | Normal |
| GSM4626768_CGTTGGGAGCAGCGTA-1 | GSM4626768 | Normal |
| GSM4626768_CGTTGGGAGCCGCCTA-1 | GSM4626768 | Normal |
| GSM4626768_CGTTGGGAGTAGCCGA-1 | GSM4626768 | Normal |
| GSM4626768_CGTTGGGCACCACCAG-1 | GSM4626768 | Normal |
| GSM4626768_CGTTGGGCATAACCTG-1 | GSM4626768 | Normal |
| GSM4626768_CGTTGGGCATACTACG-1 | GSM4626768 | Normal |
| GSM4626768_CGTTGGGCATTCTCG-1  | GSM4626768 | Normal |
| GSM4626768_CGTTGGGGTACGACCC-1 | GSM4626768 | Normal |

|                                 |            |        |
|---------------------------------|------------|--------|
| GSM4626768_CGTTGGGGTACTCAAC-1   | GSM4626768 | Normal |
| GSM4626768_CGTTGGGGTCCCTACT-1   | GSM4626768 | Normal |
| GSM4626768_CGTTGGGTCAACACTG-1   | GSM4626768 | Normal |
| GSM4626768_CGTTGGGTCAAGTGCAT-1  | GSM4626768 | Normal |
| GSM4626768_CGTTGGGTCTCATTCA-1   | GSM4626768 | Normal |
| GSM4626768_CGTTGGGTCTTGTTTG-1   | GSM4626768 | Normal |
| GSM4626768_CTAAGTACTAGGC-1      | GSM4626768 | Normal |
| GSM4626768_CTAAGTACTGCAAG-1     | GSM4626768 | Normal |
| GSM4626768_CTAAGTACTGGAAACA-1   | GSM4626768 | Normal |
| GSM4626768_CTAAGTACTCACCAGGTC-1 | GSM4626768 | Normal |
| GSM4626768_CTAAGTACTCACCAGGAA-1 | GSM4626768 | Normal |
| GSM4626768_CTAAGTACTCATTACCG-1  | GSM4626768 | Normal |
| GSM4626768_CTAAGTACTGTGCTCT-1   | GSM4626768 | Normal |
| GSM4626768_CTAAGTACTGTTATCCGA-1 | GSM4626768 | Normal |
| GSM4626768_CTAAGTACTTCCAAGCCG-1 | GSM4626768 | Normal |
| GSM4626768_CTAAGTACTTCTAGAGTC-1 | GSM4626768 | Normal |
| GSM4626768_CTAAGACAGCATCATC-1   | GSM4626768 | Normal |
| GSM4626768_CTAAGACAGCCAGTAG-1   | GSM4626768 | Normal |
| GSM4626768_CTAAGACAGCTCCTTC-1   | GSM4626768 | Normal |
| GSM4626768_CTAAGACCAACAACCT-1   | GSM4626768 | Normal |
| GSM4626768_CTAAGACCAATACGCT-1   | GSM4626768 | Normal |
| GSM4626768_CTAAGACCAATTGCTG-1   | GSM4626768 | Normal |
| GSM4626768_CTAAGACCAAGCCT-1     | GSM4626768 | Normal |
| GSM4626768_CTAAGACGTATAATGG-1   | GSM4626768 | Normal |
| GSM4626768_CTAAGACTCATTGCC-1    | GSM4626768 | Normal |
| GSM4626768_CTAAGACTCCGCATAA-1   | GSM4626768 | Normal |
| GSM4626768_CTAAGACTCGGATGGA-1   | GSM4626768 | Normal |
| GSM4626768_CTAAGACTCTAGAGTC-1   | GSM4626768 | Normal |
| GSM4626768_CTAAGACTCTCCCTGA-1   | GSM4626768 | Normal |
| GSM4626768_CTAATGGAGGAACTGC-1   | GSM4626768 | Normal |
| GSM4626768_CTAATGGAGGCAGTCA-1   | GSM4626768 | Normal |
| GSM4626768_CTAATGGTCGCTAGCG-1   | GSM4626768 | Normal |
| GSM4626768_CTAATGGTCGTACGGC-1   | GSM4626768 | Normal |
| GSM4626768_CTACACCAGAAGCCCA-1   | GSM4626768 | Normal |
| GSM4626768_CTACACCGTAAATGAC-1   | GSM4626768 | Normal |
| GSM4626768_CTACACCGTACCGAGA-1   | GSM4626768 | Normal |
| GSM4626768_CTACACCTCATTGCC-1    | GSM4626768 | Normal |
| GSM4626768_CTACACCTCCAGAGGA-1   | GSM4626768 | Normal |
| GSM4626768_CTACACCTCGAATGCT-1   | GSM4626768 | Normal |
| GSM4626768_CTACATTAGAGGTAGA-1   | GSM4626768 | Normal |
| GSM4626768_CTACATTAGCAGATCG-1   | GSM4626768 | Normal |
| GSM4626768_CTACATTAGGAGTAGA-1   | GSM4626768 | Normal |
| GSM4626768_CTACATTCAAGCCGCT-1   | GSM4626768 | Normal |
| GSM4626768_CTACATTCACAGCGTC-1   | GSM4626768 | Normal |
| GSM4626768_CTACATTGTAATCGTC-1   | GSM4626768 | Normal |
| GSM4626768_CTACATTGTATATGGA-1   | GSM4626768 | Normal |
| GSM4626768_CTACATTTCAATCACG-1   | GSM4626768 | Normal |
| GSM4626768_CTACATTTCTAGAGTC-1   | GSM4626768 | Normal |
| GSM4626768_CTACCCAAGCCCAATT-1   | GSM4626768 | Normal |
| GSM4626768_CTACCCAAGGATATAC-1   | GSM4626768 | Normal |
| GSM4626768_CTACCCAAGTTACCCA-1   | GSM4626768 | Normal |
| GSM4626768_CTACCCACACCAGCAC-1   | GSM4626768 | Normal |
| GSM4626768_CTACCCACACTCAGGC-1   | GSM4626768 | Normal |
| GSM4626768_CTACCCACAGATCCAT-1   | GSM4626768 | Normal |
| GSM4626768_CTACCCAGTCGTTGTA-1   | GSM4626768 | Normal |
| GSM4626768_CTACCCAGTCTGCGGT-1   | GSM4626768 | Normal |
| GSM4626768_CTACCCAGTTCACGG-1    | GSM4626768 | Normal |



|                                |            |        |
|--------------------------------|------------|--------|
| GSM4626768_CTACCCATCATCTGCC-1  | GSM4626768 | Normal |
| GSM4626768_CTACGTCAGAACTGTA-1  | GSM4626768 | Normal |
| GSM4626768_CTACGTCAGAATCTCC-1  | GSM4626768 | Normal |
| GSM4626768_CTACGTCAGCTAACAA-1  | GSM4626768 | Normal |
| GSM4626768_CTACGTCAGGACACCA-1  | GSM4626768 | Normal |
| GSM4626768_CTACGTCCACATCTTT-1  | GSM4626768 | Normal |
| GSM4626768_CTACGTCGTAAGGGCT-1  | GSM4626768 | Normal |
| GSM4626768_CTACGTCTCGGCGGTT-1  | GSM4626768 | Normal |
| GSM4626768_CTACGTCTCTGGTATG-1  | GSM4626768 | Normal |
| GSM4626768_CTAGAGTAGACCCACC-1  | GSM4626768 | Normal |
| GSM4626768_CTAGAGTAGTCTTGCA-1  | GSM4626768 | Normal |
| GSM4626768_CTAGAGTCACACGCTG-1  | GSM4626768 | Normal |
| GSM4626768_CTAGAGTCACTCAGGC-1  | GSM4626768 | Normal |
| GSM4626768_CTAGAGTGTACGCACC-1  | GSM4626768 | Normal |
| GSM4626768_CTAGAGTGTAGCGTGA-1  | GSM4626768 | Normal |
| GSM4626768_CTAGAGTGTCCGGCACT-1 | GSM4626768 | Normal |
| GSM4626768_CTAGAGTGTGTAATGA-1  | GSM4626768 | Normal |
| GSM4626768_CTAGAGTTCATAGCAC-1  | GSM4626768 | Normal |
| GSM4626768_CTAGAGTTCCTCATT-1   | GSM4626768 | Normal |
| GSM4626768_CTAGAGTTCCTGGAGCC-1 | GSM4626768 | Normal |
| GSM4626768_CTAGCCTAGCAATCTC-1  | GSM4626768 | Normal |
| GSM4626768_CTAGCCTAGTGACATA-1  | GSM4626768 | Normal |
| GSM4626768_CTAGCCTCACGGCTAC-1  | GSM4626768 | Normal |
| GSM4626768_CTAGCCTCAGGGTACA-1  | GSM4626768 | Normal |
| GSM4626768_CTAGCCTGTCTCTTG-1   | GSM4626768 | Normal |
| GSM4626768_CTAGCCTTACCACCT-1   | GSM4626768 | Normal |
| GSM4626768_CTAGCCTTCTCATT-1    | GSM4626768 | Normal |
| GSM4626768_CTAGCCTTCTTATCTG-1  | GSM4626768 | Normal |
| GSM4626768_CTAGTGAAGATCCCAT-1  | GSM4626768 | Normal |
| GSM4626768_CTAGTGACACCTGGTG-1  | GSM4626768 | Normal |
| GSM4626768_CTAGTGAGTCGCGGTT-1  | GSM4626768 | Normal |
| GSM4626768_CTAGTGAGTCGCTTCT-1  | GSM4626768 | Normal |
| GSM4626768_CTAGTGAGTTCGGCA-1   | GSM4626768 | Normal |
| GSM4626768_CTAGTGATCGGCGCTA-1  | GSM4626768 | Normal |
| GSM4626768_CTAGTGATCGTAGATC-1  | GSM4626768 | Normal |
| GSM4626768_CTAGTGATCGTTACAG-1  | GSM4626768 | Normal |
| GSM4626768_CTCACACAGGGCATGT-1  | GSM4626768 | Normal |
| GSM4626768_CTCACACAGTCGTA-1    | GSM4626768 | Normal |
| GSM4626768_CTCACACCAAGAGTCG-1  | GSM4626768 | Normal |
| GSM4626768_CTCACACCACTTAACG-1  | GSM4626768 | Normal |
| GSM4626768_CTCACACGTCATATGC-1  | GSM4626768 | Normal |
| GSM4626768_CTCACACGTTGGTGA-1   | GSM4626768 | Normal |
| GSM4626768_CTCACACTCACTTAT-1   | GSM4626768 | Normal |
| GSM4626768_CTCACACTCCAGGGCT-1  | GSM4626768 | Normal |
| GSM4626768_CTCACACTCGGCGCTA-1  | GSM4626768 | Normal |
| GSM4626768_CTCACACTCTGTTTGT-1  | GSM4626768 | Normal |
| GSM4626768_CTCAGAAAGCCTTGAT-1  | GSM4626768 | Normal |
| GSM4626768_CTCAGAAAGGTCATCT-1  | GSM4626768 | Normal |
| GSM4626768_CTCAGAAAGTCACGCC-1  | GSM4626768 | Normal |
| GSM4626768_CTCAGAAAGTTTGCCT-1  | GSM4626768 | Normal |
| GSM4626768_CTCAGAAACTGCGC-1    | GSM4626768 | Normal |
| GSM4626768_CTCAGAACATCGTCGG-1  | GSM4626768 | Normal |
| GSM4626768_CTCAGAACATTATCTC-1  | GSM4626768 | Normal |
| GSM4626768_CTCAGAAGTAAGGGCT-1  | GSM4626768 | Normal |
| GSM4626768_CTCAGAAGTACCAGTT-1  | GSM4626768 | Normal |
| GSM4626768_CTCAGAAGTAGCACGA-1  | GSM4626768 | Normal |
| GSM4626768_CTCAGAAGTCTAGCCG-1  | GSM4626768 | Normal |

|                               |            |        |
|-------------------------------|------------|--------|
| GSM4626768_CTCAGAAGTTCACCTC-1 | GSM4626768 | Normal |
| GSM4626768_CTCAGAATCACTTACT-1 | GSM4626768 | Normal |
| GSM4626768_CTCAGAATCGCTTGTC-1 | GSM4626768 | Normal |
| GSM4626768_CTCAGAATCTACTTAC-1 | GSM4626768 | Normal |
| GSM4626768_CTCATTAAGCTCCTCT-1 | GSM4626768 | Normal |
| GSM4626768_CTCATTACACTTCTGC-1 | GSM4626768 | Normal |
| GSM4626768_CTCATTACAGGCGATA-1 | GSM4626768 | Normal |
| GSM4626768_CTCATTAGTTCCACTC-1 | GSM4626768 | Normal |
| GSM4626768_CTCATTATCATTGCGA-1 | GSM4626768 | Normal |
| GSM4626768_CTCATTATCTGAGGGA-1 | GSM4626768 | Normal |
| GSM4626768_CTCCTAGAGAGGGATA-1 | GSM4626768 | Normal |
| GSM4626768_CTCCTAGAGCCCAACC-1 | GSM4626768 | Normal |
| GSM4626768_CTCCTAGAGCTGGAAC-1 | GSM4626768 | Normal |
| GSM4626768_CTCCTAGCATGGAATA-1 | GSM4626768 | Normal |
| GSM4626768_CTCCTAGCATTGTGCA-1 | GSM4626768 | Normal |
| GSM4626768_CTCCTAGGTAGCGCAA-1 | GSM4626768 | Normal |
| GSM4626768_CTCCTAGGTAGCTAAA-1 | GSM4626768 | Normal |
| GSM4626768_CTCCTAGGTCTCACCT-1 | GSM4626768 | Normal |
| GSM4626768_CTCCTAGGTTTGTGG-1  | GSM4626768 | Normal |
| GSM4626768_CTCCTAGTCCGCGGTA-1 | GSM4626768 | Normal |
| GSM4626768_CTCCTAGTCCTTTCTC-1 | GSM4626768 | Normal |
| GSM4626768_CTCCTAGTCGCTAGCG-1 | GSM4626768 | Normal |
| GSM4626768_CTCGAAAAGAAACCGC-1 | GSM4626768 | Normal |
| GSM4626768_CTCGAAAAGCCACCTG-1 | GSM4626768 | Normal |
| GSM4626768_CTCGAAAAGCGTTCCG-1 | GSM4626768 | Normal |
| GSM4626768_CTCGAAACAAGCGGT-1  | GSM4626768 | Normal |
| GSM4626768_CTCGAAACAAGACACG-1 | GSM4626768 | Normal |
| GSM4626768_CTCGAAAGTAAATACG-1 | GSM4626768 | Normal |
| GSM4626768_CTCGAAATCACATAGC-1 | GSM4626768 | Normal |
| GSM4626768_CTCGAAATCGCATGAT-1 | GSM4626768 | Normal |
| GSM4626768_CTCGAAATCTCGTTTA-1 | GSM4626768 | Normal |
| GSM4626768_CTCGAAATCTTCGAGA-1 | GSM4626768 | Normal |
| GSM4626768_CTCGAGGAGATGGGTC-1 | GSM4626768 | Normal |
| GSM4626768_CTCGAGGAGGTTCTTA-1 | GSM4626768 | Normal |
| GSM4626768_CTCGAGGAGTGTTGAA-1 | GSM4626768 | Normal |
| GSM4626768_CTCGAGGCACACTGCG-1 | GSM4626768 | Normal |
| GSM4626768_CTCGAGGCAGTCAGCC-1 | GSM4626768 | Normal |
| GSM4626768_CTCGAGGTCAGATAAG-1 | GSM4626768 | Normal |
| GSM4626768_CTCGAGGTCGACGGAA-1 | GSM4626768 | Normal |
| GSM4626768_CTCGAGGTCGGCATCG-1 | GSM4626768 | Normal |
| GSM4626768_CTCGAGGTCGTGGGAA-1 | GSM4626768 | Normal |
| GSM4626768_CTCGGAGAGATGTCGG-1 | GSM4626768 | Normal |
| GSM4626768_CTCGGAGAGCCAACAG-1 | GSM4626768 | Normal |
| GSM4626768_CTCGGAGCAATCTACG-1 | GSM4626768 | Normal |
| GSM4626768_CTCGGAGCAGATGGGT-1 | GSM4626768 | Normal |
| GSM4626768_CTCGGAGCAGCGAACA-1 | GSM4626768 | Normal |
| GSM4626768_CTCGGAGCATAGTAAG-1 | GSM4626768 | Normal |
| GSM4626768_CTCGGAGGTCCGTGAC-1 | GSM4626768 | Normal |
| GSM4626768_CTCGGAGGTCTAGCG-1  | GSM4626768 | Normal |
| GSM4626768_CTCGGAGGTCTAGTCA-1 | GSM4626768 | Normal |
| GSM4626768_CTCGGAGGTTGGTAAA-1 | GSM4626768 | Normal |
| GSM4626768_CTCGGAGTCTCAAGTG-1 | GSM4626768 | Normal |
| GSM4626768_CTCGGGAAGCCCAATT-1 | GSM4626768 | Normal |
| GSM4626768_CTCGGGAAGCGAAGGG-1 | GSM4626768 | Normal |
| GSM4626768_CTCGGGAAGCTTCGCG-1 | GSM4626768 | Normal |
| GSM4626768_CTCGGGAAGGGCTTGA-1 | GSM4626768 | Normal |
| GSM4626768_CTCGGGAAGTGATCGG-1 | GSM4626768 | Normal |

|                                 |            |        |
|---------------------------------|------------|--------|
| GSM4626768_CTCGGGAAGTGGGCTA-1   | GSM4626768 | Normal |
| GSM4626768_CTCGGGACACGTCTCT-1   | GSM4626768 | Normal |
| GSM4626768_CTCGGGACATCTACGA-1   | GSM4626768 | Normal |
| GSM4626768_CTCGGGACATTTCGACA-1  | GSM4626768 | Normal |
| GSM4626768_CTCGGGAGTTAGAACA-1   | GSM4626768 | Normal |
| GSM4626768_CTCGGGATCCACGTTTC-1  | GSM4626768 | Normal |
| GSM4626768_CTCGGGATCCAGAAGG-1   | GSM4626768 | Normal |
| GSM4626768_CTCGGGATCGAGAACG-1   | GSM4626768 | Normal |
| GSM4626768_CTCGTACAGGCTCAGA-1   | GSM4626768 | Normal |
| GSM4626768_CTCGTACAGTCAAGGC-1   | GSM4626768 | Normal |
| GSM4626768_CTCGTACCAAAGGTGC-1   | GSM4626768 | Normal |
| GSM4626768_CTCGTACCAAGAGTCG-1   | GSM4626768 | Normal |
| GSM4626768_CTCGTACCAATAAGCA-1   | GSM4626768 | Normal |
| GSM4626768_CTCGTACGTAGGGTAC-1   | GSM4626768 | Normal |
| GSM4626768_CTCGTACGTCCGAACC-1   | GSM4626768 | Normal |
| GSM4626768_CTCGTCAAGGTTCTTA-1   | GSM4626768 | Normal |
| GSM4626768_CTCGTCAAGTACACCT-1   | GSM4626768 | Normal |
| GSM4626768_CTCGTCAAGTAAAGAG-1   | GSM4626768 | Normal |
| GSM4626768_CTCGTCAAGTGTGCCTG-1  | GSM4626768 | Normal |
| GSM4626768_CTCGTCAAGTTCAGTAC-1  | GSM4626768 | Normal |
| GSM4626768_CTCGTCAAGTTTCCACC-1  | GSM4626768 | Normal |
| GSM4626768_CTCGTCAATCACAATGC-1  | GSM4626768 | Normal |
| GSM4626768_CTCGTCAATCATGTAGC-1  | GSM4626768 | Normal |
| GSM4626768_CTCGTCAATCGCCTGAG-1  | GSM4626768 | Normal |
| GSM4626768_CTCGTCAATCGTCCGTT-1  | GSM4626768 | Normal |
| GSM4626768_CTCGTCAATCTCTTGAT-1  | GSM4626768 | Normal |
| GSM4626768_CTCTAATCACACCGAC-1   | GSM4626768 | Normal |
| GSM4626768_CTCTAATCATCCTTGAC-1  | GSM4626768 | Normal |
| GSM4626768_CTCTAATCATGTTGAC-1   | GSM4626768 | Normal |
| GSM4626768_CTCTAATGTATATGAG-1   | GSM4626768 | Normal |
| GSM4626768_CTCTAATGTCAGATAA-1   | GSM4626768 | Normal |
| GSM4626768_CTCTAATTCAGATCC-1    | GSM4626768 | Normal |
| GSM4626768_CTCTAATTCAGTCCCT-1   | GSM4626768 | Normal |
| GSM4626768_CTCTAATTCCTGCTTG-1   | GSM4626768 | Normal |
| GSM4626768_CTCTACGCAAGTTAAG-1   | GSM4626768 | Normal |
| GSM4626768_CTCTACGCAATGAAAC-1   | GSM4626768 | Normal |
| GSM4626768_CTCTACGCAAGTTTCA-1   | GSM4626768 | Normal |
| GSM4626768_CTCTACGGTAAATGAC-1   | GSM4626768 | Normal |
| GSM4626768_CTCTACGGTATAGGGC-1   | GSM4626768 | Normal |
| GSM4626768_CTCTACGGTCACTGGC-1   | GSM4626768 | Normal |
| GSM4626768_CTCTACGGTCCGTT-1     | GSM4626768 | Normal |
| GSM4626768_CTCTACGGTCTGCTT-1    | GSM4626768 | Normal |
| GSM4626768_CTCTACGGTCTGGTATG-1  | GSM4626768 | Normal |
| GSM4626768_CTCTAGGTAAGGAATTAC-1 | GSM4626768 | Normal |
| GSM4626768_CTCTAGGTAGTATCGAA-1  | GSM4626768 | Normal |
| GSM4626768_CTCTAGGTACGCATCG-1   | GSM4626768 | Normal |
| GSM4626768_CTCTAGGTATATGCTG-1   | GSM4626768 | Normal |
| GSM4626768_CTCTAGGTGTCCATCCT-1  | GSM4626768 | Normal |
| GSM4626768_CTCTAGGTGTCTGGAGA-1  | GSM4626768 | Normal |
| GSM4626768_CTCTAGGTTCAAAGACA-1  | GSM4626768 | Normal |
| GSM4626768_CTCTAGGTTCCACGAAT-1  | GSM4626768 | Normal |
| GSM4626768_CTCTAGGTTCTAACTCT-1  | GSM4626768 | Normal |
| GSM4626768_CTCTAGGTTCTACCAGA-1  | GSM4626768 | Normal |
| GSM4626768_CTGAAACAGCACTAA-1    | GSM4626768 | Normal |
| GSM4626768_CTGAAACAGCCACGCT-1   | GSM4626768 | Normal |
| GSM4626768_CTGAAACAGCGATTCT-1   | GSM4626768 | Normal |
| GSM4626768_CTGAAACCAAGCCATT-1   | GSM4626768 | Normal |

|                                |            |        |
|--------------------------------|------------|--------|
| GSM4626768_CTGAAACCACATCCGG-1  | GSM4626768 | Normal |
| GSM4626768_CTGAAACCATCACGAT-1  | GSM4626768 | Normal |
| GSM4626768_CTGAAACGTTACGTCA-1  | GSM4626768 | Normal |
| GSM4626768_CTGAAACGTTACGCGC-1  | GSM4626768 | Normal |
| GSM4626768_CTGAAACTCAGTTCGA-1  | GSM4626768 | Normal |
| GSM4626768_CTGAAACTCATGCATG-1  | GSM4626768 | Normal |
| GSM4626768_CTGAAACTCCGTTGCT-1  | GSM4626768 | Normal |
| GSM4626768_CTGAAACTCTGTACGA-1  | GSM4626768 | Normal |
| GSM4626768_CTGAAGTAGGCCATAG-1  | GSM4626768 | Normal |
| GSM4626768_CTGAAGTCATGCCACG-1  | GSM4626768 | Normal |
| GSM4626768_CTGAAGTGTAACGTTT-1  | GSM4626768 | Normal |
| GSM4626768_CTGAAGTGTAACGGA-1   | GSM4626768 | Normal |
| GSM4626768_CTGAAGTTCACATGCA-1  | GSM4626768 | Normal |
| GSM4626768_CTGAAGTTCGATATG-1   | GSM4626768 | Normal |
| GSM4626768_CTGAAGTTCGCGACG-1   | GSM4626768 | Normal |
| GSM4626768_CTGAAGTTCCTCATGT-1  | GSM4626768 | Normal |
| GSM4626768_CTGATAGCACAGCCCA-1  | GSM4626768 | Normal |
| GSM4626768_CTGATAGCAGGGTATG-1  | GSM4626768 | Normal |
| GSM4626768_CTGATAGCATGGATGG-1  | GSM4626768 | Normal |
| GSM4626768_CTGATAGTCAGGCCCA-1  | GSM4626768 | Normal |
| GSM4626768_CTGATAGTCAGTCAGT-1  | GSM4626768 | Normal |
| GSM4626768_CTGATAGTCATCATT-1   | GSM4626768 | Normal |
| GSM4626768_CTGATAGTCTGCTGCT-1  | GSM4626768 | Normal |
| GSM4626768_CTGATCCAGACTTTCG-1  | GSM4626768 | Normal |
| GSM4626768_CTGATCCAGATCCTGT-1  | GSM4626768 | Normal |
| GSM4626768_CTGATCCAGGCACATG-1  | GSM4626768 | Normal |
| GSM4626768_CTGATCCCATAACCATG-1 | GSM4626768 | Normal |
| GSM4626768_CTGATCCCATTGGGCC-1  | GSM4626768 | Normal |
| GSM4626768_CTGATCCGTACCATCA-1  | GSM4626768 | Normal |
| GSM4626768_CTGATCCGTACCGTTA-1  | GSM4626768 | Normal |
| GSM4626768_CTGATCCGTATATGAG-1  | GSM4626768 | Normal |
| GSM4626768_CTGATCCGTCCCGACA-1  | GSM4626768 | Normal |
| GSM4626768_CTGATCCGTCTAGCG-1   | GSM4626768 | Normal |
| GSM4626768_CTGATCCGTGTTGAGG-1  | GSM4626768 | Normal |
| GSM4626768_CTGATCCTCCTTGCTC-1  | GSM4626768 | Normal |
| GSM4626768_CTGCCTAAGAATGTTG-1  | GSM4626768 | Normal |
| GSM4626768_CTGCCTAAGAGCCTAG-1  | GSM4626768 | Normal |
| GSM4626768_CTGCCTAAGGAGTACC-1  | GSM4626768 | Normal |
| GSM4626768_CTGCCTAAGTATGACA-1  | GSM4626768 | Normal |
| GSM4626768_CTGCCTACAACGCACC-1  | GSM4626768 | Normal |
| GSM4626768_CTGCCTACAGACGTAG-1  | GSM4626768 | Normal |
| GSM4626768_CTGCCTAGTACTCGCG-1  | GSM4626768 | Normal |
| GSM4626768_CTGCCTAGTAGCGATG-1  | GSM4626768 | Normal |
| GSM4626768_CTGCCTATCAGTTTGG-1  | GSM4626768 | Normal |
| GSM4626768_CTGCCTATCGGATGTT-1  | GSM4626768 | Normal |
| GSM4626768_CTGCCTATCTCCGGTT-1  | GSM4626768 | Normal |
| GSM4626768_CTGCCTATCTGCAGTA-1  | GSM4626768 | Normal |
| GSM4626768_CTGCGGAAGATATGGT-1  | GSM4626768 | Normal |
| GSM4626768_CTGCGGAAGCCAGGAT-1  | GSM4626768 | Normal |
| GSM4626768_CTGCGGAAGCGATTCT-1  | GSM4626768 | Normal |
| GSM4626768_CTGCGGAAGCTGAAAT-1  | GSM4626768 | Normal |
| GSM4626768_CTGCGGACAAAGGAAG-1  | GSM4626768 | Normal |
| GSM4626768_CTGCGGACAATAACGA-1  | GSM4626768 | Normal |
| GSM4626768_CTGCGGACACACATGT-1  | GSM4626768 | Normal |
| GSM4626768_CTGCGGAGTGCTCTTC-1  | GSM4626768 | Normal |
| GSM4626768_CTGCGGAGTGGTCCGT-1  | GSM4626768 | Normal |
| GSM4626768_CTGCGGAGTGTTGAGG-1  | GSM4626768 | Normal |

|                                |            |        |
|--------------------------------|------------|--------|
| GSM4626768_CTGCGGATCCTCCTAG-1  | GSM4626768 | Normal |
| GSM4626768_CTGCGGATCTTCTGGC-1  | GSM4626768 | Normal |
| GSM4626768_CTGCTGTAGAAGCCCA-1  | GSM4626768 | Normal |
| GSM4626768_CTGCTGTAGCTAAACA-1  | GSM4626768 | Normal |
| GSM4626768_CTGCTGTAGTACGACG-1  | GSM4626768 | Normal |
| GSM4626768_CTGCTGTAGTTGTAGA-1  | GSM4626768 | Normal |
| GSM4626768_CTGCTGTACATAACC-1   | GSM4626768 | Normal |
| GSM4626768_CTGCTGTACGTGAGA-1   | GSM4626768 | Normal |
| GSM4626768_CTGCTGTACAGGATCGA-1 | GSM4626768 | Normal |
| GSM4626768_CTGCTGTACAGGGATTG-1 | GSM4626768 | Normal |
| GSM4626768_CTGCTGTACATTCTCAT-1 | GSM4626768 | Normal |
| GSM4626768_CTGCTGTGTGCGCATAT-1 | GSM4626768 | Normal |
| GSM4626768_CTGCTGTGTCTAGGTT-1  | GSM4626768 | Normal |
| GSM4626768_CTGCTGTGTTGCCTCT-1  | GSM4626768 | Normal |
| GSM4626768_CTGCTGTTCAGCTGGC-1  | GSM4626768 | Normal |
| GSM4626768_CTGCTGTTCCCTTTCTC-1 | GSM4626768 | Normal |
| GSM4626768_CTGGTCTAGATCGGGT-1  | GSM4626768 | Normal |
| GSM4626768_CTGGTCTAGGAAGTGC-1  | GSM4626768 | Normal |
| GSM4626768_CTGGTCTGTATCTGCA-1  | GSM4626768 | Normal |
| GSM4626768_CTGGTCTGTGCATCTA-1  | GSM4626768 | Normal |
| GSM4626768_CTGGTCTTCAGCCTAA-1  | GSM4626768 | Normal |
| GSM4626768_CTGGTCTTCTGTGCAA-1  | GSM4626768 | Normal |
| GSM4626768_CTGTGCTAGTGGAGAA-1  | GSM4626768 | Normal |
| GSM4626768_CTGTGCTCACATTCGA-1  | GSM4626768 | Normal |
| GSM4626768_CTGTGCTCATAAGACA-1  | GSM4626768 | Normal |
| GSM4626768_CTGTGCTCATGCCCGA-1  | GSM4626768 | Normal |
| GSM4626768_CTGTGCTGTATTAGCC-1  | GSM4626768 | Normal |
| GSM4626768_CTGTGCTGTGCGGGT-1   | GSM4626768 | Normal |
| GSM4626768_CTGTGCTGTGTTGTA-1   | GSM4626768 | Normal |
| GSM4626768_CTGTGCTGTGTGGCTC-1  | GSM4626768 | Normal |
| GSM4626768_CTGTGCTTCCACTGGG-1  | GSM4626768 | Normal |
| GSM4626768_CTGTGCTTCTGGAGCC-1  | GSM4626768 | Normal |
| GSM4626768_CTGTGCTTCTGTCCGT-1  | GSM4626768 | Normal |
| GSM4626768_CTGTTTAAGGGTTTCT-1  | GSM4626768 | Normal |
| GSM4626768_CTGTTTAAGGTGCAAC-1  | GSM4626768 | Normal |
| GSM4626768_CTGTTTACAGTCTTCC-1  | GSM4626768 | Normal |
| GSM4626768_CTGTTTACATGGGACA-1  | GSM4626768 | Normal |
| GSM4626768_CTGTTTAGTAGCTTGT-1  | GSM4626768 | Normal |
| GSM4626768_CTGTTTAGTCACCTAA-1  | GSM4626768 | Normal |
| GSM4626768_CTGTTTAGTGTTTGGT-1  | GSM4626768 | Normal |
| GSM4626768_CTGTTTATCATCGCTC-1  | GSM4626768 | Normal |
| GSM4626768_CTGTTTATCTGCTGCT-1  | GSM4626768 | Normal |
| GSM4626768_CTTAACTAGAAACCTA-1  | GSM4626768 | Normal |
| GSM4626768_CTTAACTAGCGTCAAG-1  | GSM4626768 | Normal |
| GSM4626768_CTTAACTCACGGTAAG-1  | GSM4626768 | Normal |
| GSM4626768_CTTAACTCAGGTCCAC-1  | GSM4626768 | Normal |
| GSM4626768_CTTAACTGTAACCTC-1   | GSM4626768 | Normal |
| GSM4626768_CTTAACTGTTAAGGGC-1  | GSM4626768 | Normal |
| GSM4626768_CTTAACTGTTCCACTC-1  | GSM4626768 | Normal |
| GSM4626768_CTTAACTTCAGGCAAG-1  | GSM4626768 | Normal |
| GSM4626768_CTTAACTTCCTTGCCA-1  | GSM4626768 | Normal |
| GSM4626768_CTTAACTTCGGAGGTA-1  | GSM4626768 | Normal |
| GSM4626768_CTTAACTTCGTGGACC-1  | GSM4626768 | Normal |
| GSM4626768_CTTAACTTCTCCAGGG-1  | GSM4626768 | Normal |
| GSM4626768_CTTACCGACTGTAA-1    | GSM4626768 | Normal |
| GSM4626768_CTTACCGCAAGCGCTC-1  | GSM4626768 | Normal |
| GSM4626768_CTTACCGCAAGTAATG-1  | GSM4626768 | Normal |

|                                |            |        |
|--------------------------------|------------|--------|
| GSM4626768_CTTACCGCACCCAGTG-1  | GSM4626768 | Normal |
| GSM4626768_CTTACCGGTGGCCCTA-1  | GSM4626768 | Normal |
| GSM4626768_CTTACCGGTGTGAAAT-1  | GSM4626768 | Normal |
| GSM4626768_CTTACCGTCACGAAGG-1  | GSM4626768 | Normal |
| GSM4626768_CTTACCGTCGTACGGC-1  | GSM4626768 | Normal |
| GSM4626768_CTTAGGAAGCGTTAT-1   | GSM4626768 | Normal |
| GSM4626768_CTTAGGACAATAAGCA-1  | GSM4626768 | Normal |
| GSM4626768_CTTAGGACAGCTCCGA-1  | GSM4626768 | Normal |
| GSM4626768_CTTAGGAGTACTCTCC-1  | GSM4626768 | Normal |
| GSM4626768_CTTAGGAGTGAGTATA-1  | GSM4626768 | Normal |
| GSM4626768_CTTAGGAGTTATCCGA-1  | GSM4626768 | Normal |
| GSM4626768_CTTAGGAGTTTAGGAA-1  | GSM4626768 | Normal |
| GSM4626768_CTTAGGATCACGCATA-1  | GSM4626768 | Normal |
| GSM4626768_CTTAGGATCAGGTTCA-1  | GSM4626768 | Normal |
| GSM4626768_CTTAGGATCCCTCTTT-1  | GSM4626768 | Normal |
| GSM4626768_CTTAGGATCCGTAGTA-1  | GSM4626768 | Normal |
| GSM4626768_CTTAGGATCTCATTCA-1  | GSM4626768 | Normal |
| GSM4626768_CTTAGGATCTGTCTAT-1  | GSM4626768 | Normal |
| GSM4626768_CTTCTCTCAGGCGATA-1  | GSM4626768 | Normal |
| GSM4626768_CTTCTCTCATTCTCG-1   | GSM4626768 | Normal |
| GSM4626768_CTTCTCTGTTACCGAT-1  | GSM4626768 | Normal |
| GSM4626768_CTTCTCTGTTTAGCTG-1  | GSM4626768 | Normal |
| GSM4626768_CTTCTCTTCAACCATG-1  | GSM4626768 | Normal |
| GSM4626768_CTTCTCTTCCCTAATT-1  | GSM4626768 | Normal |
| GSM4626768_CTTCTCTTCGCATGGC-1  | GSM4626768 | Normal |
| GSM4626768_CTTCTCTTCGCCATAA-1  | GSM4626768 | Normal |
| GSM4626768_CTTGGCTCAAACGTGG-1  | GSM4626768 | Normal |
| GSM4626768_CTTGGCTCATCGATGT-1  | GSM4626768 | Normal |
| GSM4626768_CTTGGCTCATCGGAAG-1  | GSM4626768 | Normal |
| GSM4626768_CTTGGCTCATTCTTAC-1  | GSM4626768 | Normal |
| GSM4626768_CTTGGCTGTAGCGTCC-1  | GSM4626768 | Normal |
| GSM4626768_CTTGGCTGTGCTTCT-1   | GSM4626768 | Normal |
| GSM4626768_CTTGGCTGTTTCATGGT-1 | GSM4626768 | Normal |
| GSM4626768_CTTGGCTGTTTCGTGAT-1 | GSM4626768 | Normal |
| GSM4626768_CTTGGCTTCAGTCCCT-1  | GSM4626768 | Normal |
| GSM4626768_CTTGGCTTCTTTCTCTC-1 | GSM4626768 | Normal |
| GSM4626768_CTTTGCGGTCATGCCG-1  | GSM4626768 | Normal |
| GSM4626768_CTTTGCGGTGACGGTA-1  | GSM4626768 | Normal |
| GSM4626768_CTTTGCGTCATACGGT-1  | GSM4626768 | Normal |
| GSM4626768_GAAACTCAGATCTGAA-1  | GSM4626768 | Normal |
| GSM4626768_GAAACTCAGTGGAGTC-1  | GSM4626768 | Normal |
| GSM4626768_GAAACTCCAACCGCCA-1  | GSM4626768 | Normal |
| GSM4626768_GAAACTCCAATCGGTT-1  | GSM4626768 | Normal |
| GSM4626768_GAAACTCCACGGTGTC-1  | GSM4626768 | Normal |
| GSM4626768_GAAACTCCAGCTGCAC-1  | GSM4626768 | Normal |
| GSM4626768_GAAACTCGTAGATTAG-1  | GSM4626768 | Normal |
| GSM4626768_GAAACTCGTCCGTCAG-1  | GSM4626768 | Normal |
| GSM4626768_GAAACTCGTGCCTTGG-1  | GSM4626768 | Normal |
| GSM4626768_GAAATGAAGCTCCTCT-1  | GSM4626768 | Normal |
| GSM4626768_GAAATGAAGTGGTCCC-1  | GSM4626768 | Normal |
| GSM4626768_GAAATGACACGCATCG-1  | GSM4626768 | Normal |
| GSM4626768_GAAATGACAGTAAGAT-1  | GSM4626768 | Normal |
| GSM4626768_GAAATGACATGTCTCC-1  | GSM4626768 | Normal |
| GSM4626768_GAAATGAGTAAAGTCA-1  | GSM4626768 | Normal |
| GSM4626768_GAAATGAGTACACCGC-1  | GSM4626768 | Normal |
| GSM4626768_GAAATGATCGGAGGTA-1  | GSM4626768 | Normal |
| GSM4626768_GAACATCCAATCGAAA-1  | GSM4626768 | Normal |

|                               |            |        |
|-------------------------------|------------|--------|
| GSM4626768_GAACATCCACATTTCT-1 | GSM4626768 | Normal |
| GSM4626768_GAACATCCAGGCTCAC-1 | GSM4626768 | Normal |
| GSM4626768_GAACATCGTCAGAATA-1 | GSM4626768 | Normal |
| GSM4626768_GAACATCGTCCAGTGC-1 | GSM4626768 | Normal |
| GSM4626768_GAACATCGTCCCGACA-1 | GSM4626768 | Normal |
| GSM4626768_GAACATCGTCTAACGT-1 | GSM4626768 | Normal |
| GSM4626768_GAACATCGTCTAGGTT-1 | GSM4626768 | Normal |
| GSM4626768_GAACATCTCGTACCGG-1 | GSM4626768 | Normal |
| GSM4626768_GAACATCTCTCGCTTG-1 | GSM4626768 | Normal |
| GSM4626768_GAACATCTCTTAGCCC-1 | GSM4626768 | Normal |
| GSM4626768_GAACCTAAGTAACCCT-1 | GSM4626768 | Normal |
| GSM4626768_GAACCTAAGTAGTGCG-1 | GSM4626768 | Normal |
| GSM4626768_GAACCTACAAGTAGTA-1 | GSM4626768 | Normal |
| GSM4626768_GAACCTACACCAGATT-1 | GSM4626768 | Normal |
| GSM4626768_GAACCTACACCGAAAG-1 | GSM4626768 | Normal |
| GSM4626768_GAACCTACATGCAACT-1 | GSM4626768 | Normal |
| GSM4626768_GAACCTACATGTTGAC-1 | GSM4626768 | Normal |
| GSM4626768_GAACCTAGTAAACCTC-1 | GSM4626768 | Normal |
| GSM4626768_GAACCTAGTGAAAGAG-1 | GSM4626768 | Normal |
| GSM4626768_GAACCTAGTGTGAATA-1 | GSM4626768 | Normal |
| GSM4626768_GAACCTAGTTCGGCAC-1 | GSM4626768 | Normal |
| GSM4626768_GAACCTATCGACCAGC-1 | GSM4626768 | Normal |
| GSM4626768_GAACCTATCGTCTGAA-1 | GSM4626768 | Normal |
| GSM4626768_GAACCTATCGTTGCCT-1 | GSM4626768 | Normal |
| GSM4626768_GAACGGAAGAAGATTC-1 | GSM4626768 | Normal |
| GSM4626768_GAACGGAAGAGCTATA-1 | GSM4626768 | Normal |
| GSM4626768_GAACGGAAGCAATATG-1 | GSM4626768 | Normal |
| GSM4626768_GAACGGAAGCCACGTC-1 | GSM4626768 | Normal |
| GSM4626768_GAACGGAAGCGAAGGG-1 | GSM4626768 | Normal |
| GSM4626768_GAACGGACACTCTGTC-1 | GSM4626768 | Normal |
| GSM4626768_GAACGGAGTAAACCTC-1 | GSM4626768 | Normal |
| GSM4626768_GAACGGAGTGCATCTA-1 | GSM4626768 | Normal |
| GSM4626768_GAACGGAGTTACAGAA-1 | GSM4626768 | Normal |
| GSM4626768_GAACGGAGTTTGTGG-1  | GSM4626768 | Normal |
| GSM4626768_GAACGGATCTACTTAC-1 | GSM4626768 | Normal |
| GSM4626768_GAAGCAGAGACAGGCT-1 | GSM4626768 | Normal |
| GSM4626768_GAAGCAGAGATAGGAG-1 | GSM4626768 | Normal |
| GSM4626768_GAAGCAGCAGGAATCG-1 | GSM4626768 | Normal |
| GSM4626768_GAAGCAGGTAACGACG-1 | GSM4626768 | Normal |
| GSM4626768_GAAGCAGTCATGGTCA-1 | GSM4626768 | Normal |
| GSM4626768_GAAGCAGTCGGCATCG-1 | GSM4626768 | Normal |
| GSM4626768_GAATAAGAGCCGTCGT-1 | GSM4626768 | Normal |
| GSM4626768_GAATAAGAGCGATATA-1 | GSM4626768 | Normal |
| GSM4626768_GAATAAGCAGCATACT-1 | GSM4626768 | Normal |
| GSM4626768_GAATAAGCATTACGAC-1 | GSM4626768 | Normal |
| GSM4626768_GAATAAGGTAACCGGA-1 | GSM4626768 | Normal |
| GSM4626768_GAATAAGTCGCAGGCT-1 | GSM4626768 | Normal |
| GSM4626768_GAATGAAGTACAGTGG-1 | GSM4626768 | Normal |
| GSM4626768_GAATGAAGTGACTCAT-1 | GSM4626768 | Normal |
| GSM4626768_GAATGAAGTGCCCTA-1  | GSM4626768 | Normal |
| GSM4626768_GAATGAAGTTACGTCA-1 | GSM4626768 | Normal |
| GSM4626768_GAATGAATCAACGAAA-1 | GSM4626768 | Normal |
| GSM4626768_GAATGAATCCGAGCCA-1 | GSM4626768 | Normal |
| GSM4626768_GAATGAATCTGCGGCA-1 | GSM4626768 | Normal |
| GSM4626768_GACACGCAGACAATAC-1 | GSM4626768 | Normal |
| GSM4626768_GACACGCCAAGACGTG-1 | GSM4626768 | Normal |
| GSM4626768_GACACGCCAAGCTGTT-1 | GSM4626768 | Normal |

|                                |            |        |
|--------------------------------|------------|--------|
| GSM4626768_GACACGCCATGCTGGC-1  | GSM4626768 | Normal |
| GSM4626768_GACACGCCATGTAGTC-1  | GSM4626768 | Normal |
| GSM4626768_GACACGCGTCTTGATG-1  | GSM4626768 | Normal |
| GSM4626768_GACACGCGTTACCAGT-1  | GSM4626768 | Normal |
| GSM4626768_GACACGCGTTCGGCAC-1  | GSM4626768 | Normal |
| GSM4626768_GACACGCTCAGCGACC-1  | GSM4626768 | Normal |
| GSM4626768_GACACGCTCCGAATGT-1  | GSM4626768 | Normal |
| GSM4626768_GACACGCTCGTACCGG-1  | GSM4626768 | Normal |
| GSM4626768_GACACGCTCTATCCTA-1  | GSM4626768 | Normal |
| GSM4626768_GACACGCTCTTGTTTG-1  | GSM4626768 | Normal |
| GSM4626768_GACAGAGAGTAGTGCG-1  | GSM4626768 | Normal |
| GSM4626768_GACAGAGAGTGCAAGC-1  | GSM4626768 | Normal |
| GSM4626768_GACAGAGCACTAAGTC-1  | GSM4626768 | Normal |
| GSM4626768_GACAGAGCAGGACCCT-1  | GSM4626768 | Normal |
| GSM4626768_GACAGAGCAGGGTATG-1  | GSM4626768 | Normal |
| GSM4626768_GACAGAGGTCTTGTC-1   | GSM4626768 | Normal |
| GSM4626768_GACAGAGGTGGTCCGT-1  | GSM4626768 | Normal |
| GSM4626768_GACCAATAGATGTTAG-1  | GSM4626768 | Normal |
| GSM4626768_GACCAATAGCGATATA-1  | GSM4626768 | Normal |
| GSM4626768_GACCAATAGGTAAACT-1  | GSM4626768 | Normal |
| GSM4626768_GACCAATAGTCAATAG-1  | GSM4626768 | Normal |
| GSM4626768_GACCAATCATGTCCTC-1  | GSM4626768 | Normal |
| GSM4626768_GACCAATGTACCTACA-1  | GSM4626768 | Normal |
| GSM4626768_GACCAATGTCCGTGAC-1  | GSM4626768 | Normal |
| GSM4626768_GACCAATGTTACCGAT-1  | GSM4626768 | Normal |
| GSM4626768_GACCAATTCTTGAGGT-1  | GSM4626768 | Normal |
| GSM4626768_GACCTGGAGAAGGCCT-1  | GSM4626768 | Normal |
| GSM4626768_GACCTGGAGACCACGA-1  | GSM4626768 | Normal |
| GSM4626768_GACCTGGAGTCACGCC-1  | GSM4626768 | Normal |
| GSM4626768_GACCTGGAGTTAGGTA-1  | GSM4626768 | Normal |
| GSM4626768_GACCTGGCAGTTAACC-1  | GSM4626768 | Normal |
| GSM4626768_GACCTGGCATATGAGA-1  | GSM4626768 | Normal |
| GSM4626768_GACCTGGCATCACAAAC-1 | GSM4626768 | Normal |
| GSM4626768_GACCTGGGTCGACTAT-1  | GSM4626768 | Normal |
| GSM4626768_GACCTGGGTCTGATCA-1  | GSM4626768 | Normal |
| GSM4626768_GACCTGGGTGAGGGAG-1  | GSM4626768 | Normal |
| GSM4626768_GACCTGGTCAATAAGG-1  | GSM4626768 | Normal |
| GSM4626768_GACCTGGTCTAACTGG-1  | GSM4626768 | Normal |
| GSM4626768_GACCTGGTCTGGCCA-1   | GSM4626768 | Normal |
| GSM4626768_GACGCGTAGATACACA-1  | GSM4626768 | Normal |
| GSM4626768_GACGCGTCAGGGAGAG-1  | GSM4626768 | Normal |
| GSM4626768_GACGCGTCAGGTCTCG-1  | GSM4626768 | Normal |
| GSM4626768_GACGCGTCATGCCACG-1  | GSM4626768 | Normal |
| GSM4626768_GACGCGTGTGCACCAC-1  | GSM4626768 | Normal |
| GSM4626768_GACGCGTGTTGACGTT-1  | GSM4626768 | Normal |
| GSM4626768_GACGCGTTCAACACGT-1  | GSM4626768 | Normal |
| GSM4626768_GACGCGTTCACCCTCA-1  | GSM4626768 | Normal |
| GSM4626768_GACGCGTTCGCGTTTC-1  | GSM4626768 | Normal |
| GSM4626768_GACGCGTTCGTTGACA-1  | GSM4626768 | Normal |
| GSM4626768_GACGCGTTCCTGCGTG-1  | GSM4626768 | Normal |
| GSM4626768_GACGGCTAGCGAAGGG-1  | GSM4626768 | Normal |
| GSM4626768_GACGGCTAGCTAGGCA-1  | GSM4626768 | Normal |
| GSM4626768_GACGGCTCACATTTCT-1  | GSM4626768 | Normal |
| GSM4626768_GACGGCTGTCTTCGTC-1  | GSM4626768 | Normal |
| GSM4626768_GACGGCTGTGGGTCAA-1  | GSM4626768 | Normal |
| GSM4626768_GACGTGCAGATAGCAT-1  | GSM4626768 | Normal |
| GSM4626768_GACGTGCAGCGTTTAC-1  | GSM4626768 | Normal |



|                               |            |        |
|-------------------------------|------------|--------|
| GSM4626768_GACGTGCGTAAATGTG-1 | GSM4626768 | Normal |
| GSM4626768_GACGTGCGTTGAACTC-1 | GSM4626768 | Normal |
| GSM4626768_GACGTGCTCACCAGGC-1 | GSM4626768 | Normal |
| GSM4626768_GACGTGCTCCATGAAC-1 | GSM4626768 | Normal |
| GSM4626768_GACGTGCTCGCAGGCT-1 | GSM4626768 | Normal |
| GSM4626768_GACGTGCTCTCATTCA-1 | GSM4626768 | Normal |
| GSM4626768_GACGTTAAGACACGAC-1 | GSM4626768 | Normal |
| GSM4626768_GACGTTAAGAGTAATC-1 | GSM4626768 | Normal |
| GSM4626768_GACGTTACAGGGCATA-1 | GSM4626768 | Normal |
| GSM4626768_GACGTTACATCTCCCA-1 | GSM4626768 | Normal |
| GSM4626768_GACGTTATCAAACAAG-1 | GSM4626768 | Normal |
| GSM4626768_GACGTTATCTGGTGTA-1 | GSM4626768 | Normal |
| GSM4626768_GACTAACAGGAGTCTG-1 | GSM4626768 | Normal |
| GSM4626768_GACTAACCAATAGCAA-1 | GSM4626768 | Normal |
| GSM4626768_GACTAACGTAGAGTGC-1 | GSM4626768 | Normal |
| GSM4626768_GACTAACGTCATATGC-1 | GSM4626768 | Normal |
| GSM4626768_GACTAACGTCGAGTTT-1 | GSM4626768 | Normal |
| GSM4626768_GACTAACTCTAGCACA-1 | GSM4626768 | Normal |
| GSM4626768_GACTACAAGCTAGTGG-1 | GSM4626768 | Normal |
| GSM4626768_GACTACAAGTCCGGTC-1 | GSM4626768 | Normal |
| GSM4626768_GACTACACAAGACACG-1 | GSM4626768 | Normal |
| GSM4626768_GACTACACACGTTGGC-1 | GSM4626768 | Normal |
| GSM4626768_GACTACAGTACCCAAT-1 | GSM4626768 | Normal |
| GSM4626768_GACTACAGTCCGACGT-1 | GSM4626768 | Normal |
| GSM4626768_GACTACAGTCTCTTTA-1 | GSM4626768 | Normal |
| GSM4626768_GACTACAGTCTTGATG-1 | GSM4626768 | Normal |
| GSM4626768_GACTACATCAACTCTT-1 | GSM4626768 | Normal |
| GSM4626768_GACTACATCACTGGGC-1 | GSM4626768 | Normal |
| GSM4626768_GACTACATCATCGATG-1 | GSM4626768 | Normal |
| GSM4626768_GACTACATCCGCATAA-1 | GSM4626768 | Normal |
| GSM4626768_GACTACATCGCGTTTC-1 | GSM4626768 | Normal |
| GSM4626768_GACTACATCGGCATCG-1 | GSM4626768 | Normal |
| GSM4626768_GACTGCGCACATCCGG-1 | GSM4626768 | Normal |
| GSM4626768_GACTGCGCACCAGATT-1 | GSM4626768 | Normal |
| GSM4626768_GACTGCGCAGCCACCA-1 | GSM4626768 | Normal |
| GSM4626768_GACTGCGGTAAGAGAG-1 | GSM4626768 | Normal |
| GSM4626768_GACTGCGGTACGACCC-1 | GSM4626768 | Normal |
| GSM4626768_GACTGCGGTGAAGGCT-1 | GSM4626768 | Normal |
| GSM4626768_GACTGCGGTTGCGCAC-1 | GSM4626768 | Normal |
| GSM4626768_GACTGCGTCAAACCGT-1 | GSM4626768 | Normal |
| GSM4626768_GACTGCGTCACAGTAC-1 | GSM4626768 | Normal |
| GSM4626768_GACTGCGTCAGCCCA-1  | GSM4626768 | Normal |
| GSM4626768_GACTGCGTCCTTGGTC-1 | GSM4626768 | Normal |
| GSM4626768_GACTGCGTCGTCCAGG-1 | GSM4626768 | Normal |
| GSM4626768_GACTGCGTCTTAGCCC-1 | GSM4626768 | Normal |
| GSM4626768_GACTGCGTCTTCATGT-1 | GSM4626768 | Normal |
| GSM4626768_GAGCAGAAGAAACCTA-1 | GSM4626768 | Normal |
| GSM4626768_GAGCAGAAGAGATGAG-1 | GSM4626768 | Normal |
| GSM4626768_GAGCAGAAGCCTTGAT-1 | GSM4626768 | Normal |
| GSM4626768_GAGCAGAAGGCGACAT-1 | GSM4626768 | Normal |
| GSM4626768_GAGCAGAAGGCTCATT-1 | GSM4626768 | Normal |
| GSM4626768_GAGCAGAAGGTGCAAC-1 | GSM4626768 | Normal |
| GSM4626768_GAGCAGACAACACCCG-1 | GSM4626768 | Normal |
| GSM4626768_GAGCAGAGTAGCGCAA-1 | GSM4626768 | Normal |
| GSM4626768_GAGCAGAGTCCATCCT-1 | GSM4626768 | Normal |
| GSM4626768_GAGCAGAGTTCCGTCT-1 | GSM4626768 | Normal |
| GSM4626768_GAGCAGATCATGTCTT-1 | GSM4626768 | Normal |

|                               |            |        |
|-------------------------------|------------|--------|
| GSM4626768_GAGCAGATCGCTAGCG-1 | GSM4626768 | Normal |
| GSM4626768_GAGCAGATCTGCTGTC-1 | GSM4626768 | Normal |
| GSM4626768_GAGGTGAAGACTGTAA-1 | GSM4626768 | Normal |
| GSM4626768_GAGGTGAAGTCCATAC-1 | GSM4626768 | Normal |
| GSM4626768_GAGGTGACAACACCTA-1 | GSM4626768 | Normal |
| GSM4626768_GAGGTGACACATGACT-1 | GSM4626768 | Normal |
| GSM4626768_GAGGTGACAGTTAACC-1 | GSM4626768 | Normal |
| GSM4626768_GAGGTGACATGCTAGT-1 | GSM4626768 | Normal |
| GSM4626768_GAGGTGAGTGACGCCT-1 | GSM4626768 | Normal |
| GSM4626768_GAGGTGAGTGTGAAAT-1 | GSM4626768 | Normal |
| GSM4626768_GAGGTGAGTTCAGACT-1 | GSM4626768 | Normal |
| GSM4626768_GAGGTGATCACTCCTG-1 | GSM4626768 | Normal |
| GSM4626768_GAGGTGATCATCACCC-1 | GSM4626768 | Normal |
| GSM4626768_GAGGTGATCCATGAGT-1 | GSM4626768 | Normal |
| GSM4626768_GAGGTGATCCGTCAA-1  | GSM4626768 | Normal |
| GSM4626768_GAGGTGATCGCAGGCT-1 | GSM4626768 | Normal |
| GSM4626768_GAGGTGATCTATCGCC-1 | GSM4626768 | Normal |
| GSM4626768_GAGGTGATCTGGTATG-1 | GSM4626768 | Normal |
| GSM4626768_GAGGTGATCTTCTGGC-1 | GSM4626768 | Normal |
| GSM4626768_GAGTCCGAGACTAGAT-1 | GSM4626768 | Normal |
| GSM4626768_GAGTCCGCAGGACCCT-1 | GSM4626768 | Normal |
| GSM4626768_GAGTCCGGTATCACCA-1 | GSM4626768 | Normal |
| GSM4626768_GAGTCCGGTCTGCCAG-1 | GSM4626768 | Normal |
| GSM4626768_GAGTCCGGTTATGTGC-1 | GSM4626768 | Normal |
| GSM4626768_GAGTCCGGTTCGCGAC-1 | GSM4626768 | Normal |
| GSM4626768_GAGTCCGTCCACGTTT-1 | GSM4626768 | Normal |
| GSM4626768_GATCAGTAGAGCTTCT-1 | GSM4626768 | Normal |
| GSM4626768_GATCAGTAGAGTACCG-1 | GSM4626768 | Normal |
| GSM4626768_GATCAGTAGGAATCGC-1 | GSM4626768 | Normal |
| GSM4626768_GATCAGTAGGCCCTTG-1 | GSM4626768 | Normal |
| GSM4626768_GATCAGTACACCGAC-1  | GSM4626768 | Normal |
| GSM4626768_GATCAGTCACTTCGAA-1 | GSM4626768 | Normal |
| GSM4626768_GATCAGTGTGAGTGAC-1 | GSM4626768 | Normal |
| GSM4626768_GATCAGTTCAGTGTTG-1 | GSM4626768 | Normal |
| GSM4626768_GATCAGTTCGTTACAG-1 | GSM4626768 | Normal |
| GSM4626768_GATCGATAGACCACGA-1 | GSM4626768 | Normal |
| GSM4626768_GATCGATAGCCTTGAT-1 | GSM4626768 | Normal |
| GSM4626768_GATCGATAGGGCTTCC-1 | GSM4626768 | Normal |
| GSM4626768_GATCGATAGTGGTAGC-1 | GSM4626768 | Normal |
| GSM4626768_GATCGATCATGTTGAC-1 | GSM4626768 | Normal |
| GSM4626768_GATCGATGTAAACACA-1 | GSM4626768 | Normal |
| GSM4626768_GATCGATGTACGAAAT-1 | GSM4626768 | Normal |
| GSM4626768_GATCGATGTCTAAACC-1 | GSM4626768 | Normal |
| GSM4626768_GATCGATTCTGGTTCC-1 | GSM4626768 | Normal |
| GSM4626768_GATCGATTCTTGAGAC-1 | GSM4626768 | Normal |
| GSM4626768_GATCGCGAGACAGACC-1 | GSM4626768 | Normal |
| GSM4626768_GATCGCGAGGATATAC-1 | GSM4626768 | Normal |
| GSM4626768_GATCGCGAGGCAATTA-1 | GSM4626768 | Normal |
| GSM4626768_GATCGCGCAAGTTCT-1  | GSM4626768 | Normal |
| GSM4626768_GATCGCGCATCGGACC-1 | GSM4626768 | Normal |
| GSM4626768_GATCGCGCATGCTGGC-1 | GSM4626768 | Normal |
| GSM4626768_GATCGCGGTCCAGTTA-1 | GSM4626768 | Normal |
| GSM4626768_GATCGCGGTTTCAATC-1 | GSM4626768 | Normal |
| GSM4626768_GATCGCGTCCAGGGCT-1 | GSM4626768 | Normal |
| GSM4626768_GATCGCGTCCATTCA-1  | GSM4626768 | Normal |
| GSM4626768_GATCGCGTCTGAGTGT-1 | GSM4626768 | Normal |
| GSM4626768_GATCGTACAACTGCT-1  | GSM4626768 | Normal |

|                                  |            |        |
|----------------------------------|------------|--------|
| GSM4626768_GATCGTACATTCCTCG-1    | GSM4626768 | Normal |
| GSM4626768_GATCGTAGTGTGCCTG-1    | GSM4626768 | Normal |
| GSM4626768_GATCGTATCAACACAC-1    | GSM4626768 | Normal |
| GSM4626768_GATCTAGCAATACGCT-1    | GSM4626768 | Normal |
| GSM4626768_GATCTAGCACTTAACG-1    | GSM4626768 | Normal |
| GSM4626768_GATCTAGCAGCTGCAC-1    | GSM4626768 | Normal |
| GSM4626768_GATCTAGGTACCCAAT-1    | GSM4626768 | Normal |
| GSM4626768_GATCTAGGTGGTTTCA-1    | GSM4626768 | Normal |
| GSM4626768_GATCTAGGTTCTCATT-1    | GSM4626768 | Normal |
| GSM4626768_GATCTAGTCACTGGGC-1    | GSM4626768 | Normal |
| GSM4626768_GATCTAGTCTAGCACA-1    | GSM4626768 | Normal |
| GSM4626768_GATCTAGTCTATCGCC-1    | GSM4626768 | Normal |
| GSM4626768_GATGAAAAGCTAGGCA-1    | GSM4626768 | Normal |
| GSM4626768_GATGAAAAGCTGAAAT-1    | GSM4626768 | Normal |
| GSM4626768_GATGAAACATATGAGA-1    | GSM4626768 | Normal |
| GSM4626768_GATGAAAAGTAAGTAGT-1   | GSM4626768 | Normal |
| GSM4626768_GATGAAAAGTCGGGTCT-1   | GSM4626768 | Normal |
| GSM4626768_GATGAAAAGTCTCAACA-1   | GSM4626768 | Normal |
| GSM4626768_GATGAAAAGTCTCGTTC-1   | GSM4626768 | Normal |
| GSM4626768_GATGAAATCCTTTCTC-1    | GSM4626768 | Normal |
| GSM4626768_GATGAAATCGTCCGTT-1    | GSM4626768 | Normal |
| GSM4626768_GATGAAATCTGATTCT-1    | GSM4626768 | Normal |
| GSM4626768_GATGAGGAGTAACCCT-1    | GSM4626768 | Normal |
| GSM4626768_GATGAGGCAGGATCGA-1    | GSM4626768 | Normal |
| GSM4626768_GATGAGGGTGTAAACGG-1   | GSM4626768 | Normal |
| GSM4626768_GATGAGGGTGTGGCTC-1    | GSM4626768 | Normal |
| GSM4626768_GATGAGGGTTTGACAC-1    | GSM4626768 | Normal |
| GSM4626768_GATGAGGGTTTGGGCC-1    | GSM4626768 | Normal |
| GSM4626768_GATGAGGTCAACCATG-1    | GSM4626768 | Normal |
| GSM4626768_GATGCTAAGGGAACGG-1    | GSM4626768 | Normal |
| GSM4626768_GATGCTACACGTTGGC-1    | GSM4626768 | Normal |
| GSM4626768_GATGCTAGTATCTGCA-1    | GSM4626768 | Normal |
| GSM4626768_GATGCTAGTCTGCGGT-1    | GSM4626768 | Normal |
| GSM4626768_GATGCTAGTTGGACCC-1    | GSM4626768 | Normal |
| GSM4626768_GATTCAGAGAACAATC-1    | GSM4626768 | Normal |
| GSM4626768_GATTCAGAGATCACGG-1    | GSM4626768 | Normal |
| GSM4626768_GATTCAGAGGAATTAC-1    | GSM4626768 | Normal |
| GSM4626768_GATTCAGAGGGCTCTC-1    | GSM4626768 | Normal |
| GSM4626768_GATTCAGAGTACTTGC-1    | GSM4626768 | Normal |
| GSM4626768_GATTCAGCAAGGACAC-1    | GSM4626768 | Normal |
| GSM4626768_GATTCAGCACACCGAC-1    | GSM4626768 | Normal |
| GSM4626768_GATTCAGCACGAAATA-1    | GSM4626768 | Normal |
| GSM4626768_GATTCAGCACTTCTGC-1    | GSM4626768 | Normal |
| GSM4626768_GATTCAGCAGGTCTCG-1    | GSM4626768 | Normal |
| GSM4626768_GATTCAGCATGAAGTA-1    | GSM4626768 | Normal |
| GSM4626768_GATTCAGGTAAGAGGA-1    | GSM4626768 | Normal |
| GSM4626768_GATTCAGGTTAAGAAC-1    | GSM4626768 | Normal |
| GSM4626768_GATTCAGTCAGCACAT-1    | GSM4626768 | Normal |
| GSM4626768_GATTCAGTCCCTGACT-1    | GSM4626768 | Normal |
| GSM4626768_GATTCAGTCTGCTTGC-1    | GSM4626768 | Normal |
| GSM4626768_GATTCAGTCTTCGAGA-1    | GSM4626768 | Normal |
| GSM4626768_GCAAAGTACTAGCCACGCT-1 | GSM4626768 | Normal |
| GSM4626768_GCAAAGTACTAGCTAGTCT-1 | GSM4626768 | Normal |
| GSM4626768_GCAAAGTACTAGCTCAACT-1 | GSM4626768 | Normal |
| GSM4626768_GCAAAGTCAAGCCGCT-1    | GSM4626768 | Normal |
| GSM4626768_GCAAAGTCACTCTCGCT-1   | GSM4626768 | Normal |
| GSM4626768_GCAAAGTGTCTAACGT-1    | GSM4626768 | Normal |

|                               |            |        |
|-------------------------------|------------|--------|
| GSM4626768_GCAATCAAGAGGGCTT-1 | GSM4626768 | Normal |
| GSM4626768_GCAATCAAGAGTGAGA-1 | GSM4626768 | Normal |
| GSM4626768_GCAATCAAGATAGCAT-1 | GSM4626768 | Normal |
| GSM4626768_GCAATCAAGGTGCTAG-1 | GSM4626768 | Normal |
| GSM4626768_GCAATCAAGTATCTCG-1 | GSM4626768 | Normal |
| GSM4626768_GCAATCACAATAGCGG-1 | GSM4626768 | Normal |
| GSM4626768_GCAATCAGTGCATCTA-1 | GSM4626768 | Normal |
| GSM4626768_GCAATCAGTTAAGGGC-1 | GSM4626768 | Normal |
| GSM4626768_GCAATCAGTTCCACGG-1 | GSM4626768 | Normal |
| GSM4626768_GCAATCATCACATGCA-1 | GSM4626768 | Normal |
| GSM4626768_GCAATCATCCACGCAG-1 | GSM4626768 | Normal |
| GSM4626768_GCAATCATCCAGGGCT-1 | GSM4626768 | Normal |
| GSM4626768_GCACATAAGACCTTTG-1 | GSM4626768 | Normal |
| GSM4626768_GCACATAAGATGCCAG-1 | GSM4626768 | Normal |
| GSM4626768_GCACATAAGGAGTTGC-1 | GSM4626768 | Normal |
| GSM4626768_GCACATAAGTCGTA-1   | GSM4626768 | Normal |
| GSM4626768_GCACATACAAAGGTGC-1 | GSM4626768 | Normal |
| GSM4626768_GCACATACACGAAGCA-1 | GSM4626768 | Normal |
| GSM4626768_GCACATAGTCTCAACA-1 | GSM4626768 | Normal |
| GSM4626768_GCACATAGTGAAGGCT-1 | GSM4626768 | Normal |
| GSM4626768_GCACATAGTGATGTGG-1 | GSM4626768 | Normal |
| GSM4626768_GCACATATCAGGCAAG-1 | GSM4626768 | Normal |
| GSM4626768_GCACATATCGGCCGAT-1 | GSM4626768 | Normal |
| GSM4626768_GCACATATCGGTAAAC-1 | GSM4626768 | Normal |
| GSM4626768_GCACATATCGTAGGTT-1 | GSM4626768 | Normal |
| GSM4626768_GCACTCTAGCGTTGCC-1 | GSM4626768 | Normal |
| GSM4626768_GCACTCTACGGACAA-1  | GSM4626768 | Normal |
| GSM4626768_GCACTCTTCTCTGAGA-1 | GSM4626768 | Normal |
| GSM4626768_GCAGCCAAGAAGGGTA-1 | GSM4626768 | Normal |
| GSM4626768_GCAGCCACAAGCGCTC-1 | GSM4626768 | Normal |
| GSM4626768_GCAGCCACACCTCGGA-1 | GSM4626768 | Normal |
| GSM4626768_GCAGCCACACTGAAGG-1 | GSM4626768 | Normal |
| GSM4626768_GCAGCCAGTACAGCAG-1 | GSM4626768 | Normal |
| GSM4626768_GCAGCCAGTACCAGTT-1 | GSM4626768 | Normal |
| GSM4626768_GCAGCCAGTCATGCCG-1 | GSM4626768 | Normal |
| GSM4626768_GCAGCCAGTGCCTTA-1  | GSM4626768 | Normal |
| GSM4626768_GCAGCCATCGTAGGTT-1 | GSM4626768 | Normal |
| GSM4626768_GCAGTTACACATCCAA-1 | GSM4626768 | Normal |
| GSM4626768_GCAGTTACACCACCAG-1 | GSM4626768 | Normal |
| GSM4626768_GCAGTTACAGACAAGC-1 | GSM4626768 | Normal |
| GSM4626768_GCAGTTACAGCCTTGG-1 | GSM4626768 | Normal |
| GSM4626768_GCAGTTAGTCAGGACA-1 | GSM4626768 | Normal |
| GSM4626768_GCAGTTATCATGTCTT-1 | GSM4626768 | Normal |
| GSM4626768_GCAGTTATCCGCAAGC-1 | GSM4626768 | Normal |
| GSM4626768_GCAGTTATCGTGGTCG-1 | GSM4626768 | Normal |
| GSM4626768_GCAGTTATCTATCCTA-1 | GSM4626768 | Normal |
| GSM4626768_GCATACAAGGCACATG-1 | GSM4626768 | Normal |
| GSM4626768_GCATACAAGGGATACC-1 | GSM4626768 | Normal |
| GSM4626768_GCATACAAGTAGATGT-1 | GSM4626768 | Normal |
| GSM4626768_GCATACACAGATTGCT-1 | GSM4626768 | Normal |
| GSM4626768_GCATACAGTAACGACG-1 | GSM4626768 | Normal |
| GSM4626768_GCATACAGTCTTCAAG-1 | GSM4626768 | Normal |
| GSM4626768_GCATACAGTTGTCTTT-1 | GSM4626768 | Normal |
| GSM4626768_GCATACATCTAACTTC-1 | GSM4626768 | Normal |
| GSM4626768_GCATGATAGGGAACGG-1 | GSM4626768 | Normal |
| GSM4626768_GCATGATCAAGCTGGA-1 | GSM4626768 | Normal |
| GSM4626768_GCATGATCATCACAAC-1 | GSM4626768 | Normal |

|                                |            |        |
|--------------------------------|------------|--------|
| GSM4626768_GCATGATGTCGCATCG-1  | GSM4626768 | Normal |
| GSM4626768_GCATGATGTTGGTTTG-1  | GSM4626768 | Normal |
| GSM4626768_GCATGATTCTTGCCGT-1  | GSM4626768 | Normal |
| GSM4626768_GCATGCGAGAACTCGG-1  | GSM4626768 | Normal |
| GSM4626768_GCATGCGCAAGTACCT-1  | GSM4626768 | Normal |
| GSM4626768_GCATGCGCACCAGATT-1  | GSM4626768 | Normal |
| GSM4626768_GCATGCGCACCTGGTG-1  | GSM4626768 | Normal |
| GSM4626768_GCATGCGTCAACACGT-1  | GSM4626768 | Normal |
| GSM4626768_GCATGCGTCGTGACAT-1  | GSM4626768 | Normal |
| GSM4626768_GCATGTAAGACGCTTT-1  | GSM4626768 | Normal |
| GSM4626768_GCATGTAAGATCCCGC-1  | GSM4626768 | Normal |
| GSM4626768_GCATGTAAGCCATCGC-1  | GSM4626768 | Normal |
| GSM4626768_GCATGTAAGGTACTCT-1  | GSM4626768 | Normal |
| GSM4626768_GCATGTAAGTCGCCGT-1  | GSM4626768 | Normal |
| GSM4626768_GCATGTAAGTTATCGC-1  | GSM4626768 | Normal |
| GSM4626768_GCATGTACACGTCAGC-1  | GSM4626768 | Normal |
| GSM4626768_GCATGTAGTCCCTTGT-1  | GSM4626768 | Normal |
| GSM4626768_GCATGTAGTCTAGTGT-1  | GSM4626768 | Normal |
| GSM4626768_GCATGTAGTTACCAGT-1  | GSM4626768 | Normal |
| GSM4626768_GCATGTAGTTCACGG-1   | GSM4626768 | Normal |
| GSM4626768_GCATGTAGTTTCCACC-1  | GSM4626768 | Normal |
| GSM4626768_GCATGTATCAGAAATG-1  | GSM4626768 | Normal |
| GSM4626768_GCATGTATCAGCTTAG-1  | GSM4626768 | Normal |
| GSM4626768_GCATGTATCAGTTAGC-1  | GSM4626768 | Normal |
| GSM4626768_GCATGTATCCTTTCGG-1  | GSM4626768 | Normal |
| GSM4626768_GCATGTATCTGTTTGT-1  | GSM4626768 | Normal |
| GSM4626768_GCCAAATAGACAAAGG-1  | GSM4626768 | Normal |
| GSM4626768_GCCAAATAGGGCACTA-1  | GSM4626768 | Normal |
| GSM4626768_GCCAAATCATACGCTA-1  | GSM4626768 | Normal |
| GSM4626768_GCCAAATCATCACGAT-1  | GSM4626768 | Normal |
| GSM4626768_GCCAAATCATGCGCAC-1  | GSM4626768 | Normal |
| GSM4626768_GCCAAATGTAGCGTAG-1  | GSM4626768 | Normal |
| GSM4626768_GCCAAATGTAGGGTAC-1  | GSM4626768 | Normal |
| GSM4626768_GCCAAATGTCACTGGC-1  | GSM4626768 | Normal |
| GSM4626768_GCCAAATGTCATGCCG-1  | GSM4626768 | Normal |
| GSM4626768_GCCAAATGTGACCAAG-1  | GSM4626768 | Normal |
| GSM4626768_GCCAAATGTGCGCTTG-1  | GSM4626768 | Normal |
| GSM4626768_GCCAAATTCAGCTTAG-1  | GSM4626768 | Normal |
| GSM4626768_GCCAAATTCATCTGCC-1  | GSM4626768 | Normal |
| GSM4626768_GCCAAATTCGACCAGC-1  | GSM4626768 | Normal |
| GSM4626768_GCCAAATTCGCCGTGA-1  | GSM4626768 | Normal |
| GSM4626768_GCCAAATTCGGAATCT-1  | GSM4626768 | Normal |
| GSM4626768_GCCAAATTCGTAGGTT-1  | GSM4626768 | Normal |
| GSM4626768_GCCAAATTCGTGCTGCT-1 | GSM4626768 | Normal |
| GSM4626768_GCCTCTAAGATAGGAG-1  | GSM4626768 | Normal |
| GSM4626768_GCCTCTAAGGACAGAA-1  | GSM4626768 | Normal |
| GSM4626768_GCCTCTACAGCCAATT-1  | GSM4626768 | Normal |
| GSM4626768_GCCTCTACATGTCTCC-1  | GSM4626768 | Normal |
| GSM4626768_GCCTCTATCACCCCTCA-1 | GSM4626768 | Normal |
| GSM4626768_GCCTCTATCTTGCAAG-1  | GSM4626768 | Normal |
| GSM4626768_GCGACCAAGTACTTGC-1  | GSM4626768 | Normal |
| GSM4626768_GCGACCACAAAGGAAG-1  | GSM4626768 | Normal |
| GSM4626768_GCGACCACACCTATCC-1  | GSM4626768 | Normal |
| GSM4626768_GCGACCACACGAAAGC-1  | GSM4626768 | Normal |
| GSM4626768_GCGACCAGTACTTCTT-1  | GSM4626768 | Normal |
| GSM4626768_GCGACCAGTCTTCTCG-1  | GSM4626768 | Normal |
| GSM4626768_GCGACCATCTTATCTG-1  | GSM4626768 | Normal |

|                                |            |        |
|--------------------------------|------------|--------|
| GSM4626768_GCGACCATCTTGAGGT-1  | GSM4626768 | Normal |
| GSM4626768_GCGAGAAAGACAGACC-1  | GSM4626768 | Normal |
| GSM4626768_GCGAGAAAGATCTGAA-1  | GSM4626768 | Normal |
| GSM4626768_GCGAGAAAGGAGTTTA-1  | GSM4626768 | Normal |
| GSM4626768_GCGAGAAAGTCAATAG-1  | GSM4626768 | Normal |
| GSM4626768_GCGAGAACAAGGTTCT-1  | GSM4626768 | Normal |
| GSM4626768_GCGAGAAGTAAGAGAG-1  | GSM4626768 | Normal |
| GSM4626768_GCGAGAAGTCGAAAGC-1  | GSM4626768 | Normal |
| GSM4626768_GCGAGAAGTTCGGCAC-1  | GSM4626768 | Normal |
| GSM4626768_GCGAGAATCATGTAGC-1  | GSM4626768 | Normal |
| GSM4626768_GCGCAACAGAGGGATA-1  | GSM4626768 | Normal |
| GSM4626768_GCGCAACAGTACGTAA-1  | GSM4626768 | Normal |
| GSM4626768_GCGCAACCAATGGAAT-1  | GSM4626768 | Normal |
| GSM4626768_GCGCAACCACGGCCAT-1  | GSM4626768 | Normal |
| GSM4626768_GCGCAACGTCCGAATT-1  | GSM4626768 | Normal |
| GSM4626768_GCGCAACGTTCGCATCG-1 | GSM4626768 | Normal |
| GSM4626768_GCGCAACGTTCGCGTGT-1 | GSM4626768 | Normal |
| GSM4626768_GCGCAACTCGAATCCA-1  | GSM4626768 | Normal |
| GSM4626768_GCGCAGTAGGGCTCTC-1  | GSM4626768 | Normal |
| GSM4626768_GCGCAGTAGTACGATA-1  | GSM4626768 | Normal |
| GSM4626768_GCGCAGTCACAGTCGC-1  | GSM4626768 | Normal |
| GSM4626768_GCGCAGTCAGTCCTTC-1  | GSM4626768 | Normal |
| GSM4626768_GCGCAGTCATCCTAGA-1  | GSM4626768 | Normal |
| GSM4626768_GCGCAGTCATCGATGT-1  | GSM4626768 | Normal |
| GSM4626768_GCGCAGTGTGCAGACA-1  | GSM4626768 | Normal |
| GSM4626768_GCGCAGTGTTAAGACA-1  | GSM4626768 | Normal |
| GSM4626768_GCGCAGTTCAACGGCC-1  | GSM4626768 | Normal |
| GSM4626768_GCGCAGTTCCTAATT-1   | GSM4626768 | Normal |
| GSM4626768_GCGCAGTTCTCGCTTG-1  | GSM4626768 | Normal |
| GSM4626768_GCGCAGTTCTTGCCGT-1  | GSM4626768 | Normal |
| GSM4626768_GCGCCAAAGAGACTAT-1  | GSM4626768 | Normal |
| GSM4626768_GCGCCAAAGTTCGCGC-1  | GSM4626768 | Normal |
| GSM4626768_GCGCCAACACCATCCT-1  | GSM4626768 | Normal |
| GSM4626768_GCGCCAACACCTATCC-1  | GSM4626768 | Normal |
| GSM4626768_GCGCCAACATGATCCA-1  | GSM4626768 | Normal |
| GSM4626768_GCGCCAACATTGACA-1   | GSM4626768 | Normal |
| GSM4626768_GCGCCAAGTCTTTCAT-1  | GSM4626768 | Normal |
| GSM4626768_GCGCCAATCACATGCA-1  | GSM4626768 | Normal |
| GSM4626768_GCGCCAATCGAATGGG-1  | GSM4626768 | Normal |
| GSM4626768_GCGCCAATCGTTTAGG-1  | GSM4626768 | Normal |
| GSM4626768_GCGCCAATCTCAAACG-1  | GSM4626768 | Normal |
| GSM4626768_GCGCGATCATCCTTGC-1  | GSM4626768 | Normal |
| GSM4626768_GCGCGATGTCAACTGT-1  | GSM4626768 | Normal |
| GSM4626768_GCGCGATGTCACTGGC-1  | GSM4626768 | Normal |
| GSM4626768_GCGCGATGTGCACGAA-1  | GSM4626768 | Normal |
| GSM4626768_GCGCGATGTTTGTGTG-1  | GSM4626768 | Normal |
| GSM4626768_GCGCGATTCATTTGGG-1  | GSM4626768 | Normal |
| GSM4626768_GCGCGATTCGAATGGT-1  | GSM4626768 | Normal |
| GSM4626768_GCGCGATTCGTCTGCT-1  | GSM4626768 | Normal |
| GSM4626768_GCGCGATTCTCCTATA-1  | GSM4626768 | Normal |
| GSM4626768_GCGGGTTAGACTAGGC-1  | GSM4626768 | Normal |
| GSM4626768_GCGGGTTAGTACGACG-1  | GSM4626768 | Normal |
| GSM4626768_GCGGGTTCACGAAACG-1  | GSM4626768 | Normal |
| GSM4626768_GCGGGTTCAGACGCAA-1  | GSM4626768 | Normal |
| GSM4626768_GCGGGTTGTAGCAAAT-1  | GSM4626768 | Normal |
| GSM4626768_GCGGGTTGTGAGTGA-1   | GSM4626768 | Normal |
| GSM4626768_GCGGGTTGTCTCCCTA-1  | GSM4626768 | Normal |

|                                |            |        |
|--------------------------------|------------|--------|
| GSM4626768_GCGGGTTGTTGGTTTG-1  | GSM4626768 | Normal |
| GSM4626768_GCTCCTAAGTCTCAAC-1  | GSM4626768 | Normal |
| GSM4626768_GCTCCTACTGTCCGG-1   | GSM4626768 | Normal |
| GSM4626768_GCTCCTAGTACGCACC-1  | GSM4626768 | Normal |
| GSM4626768_GCTCCTAGTGCACCTTA-1 | GSM4626768 | Normal |
| GSM4626768_GCTCCTAGTGCGAAAC-1  | GSM4626768 | Normal |
| GSM4626768_GCTCCTAGTGTAAGTA-1  | GSM4626768 | Normal |
| GSM4626768_GCTCCTATCGCAAAC-1   | GSM4626768 | Normal |
| GSM4626768_GCTCTGTCAAGTACCT-1  | GSM4626768 | Normal |
| GSM4626768_GCTCTGTCAAGTTAAG-1  | GSM4626768 | Normal |
| GSM4626768_GCTCTGTCAGACAAAT-1  | GSM4626768 | Normal |
| GSM4626768_GCTCTGTTCAAACCAC-1  | GSM4626768 | Normal |
| GSM4626768_GCTCTGTTCCAAATGC-1  | GSM4626768 | Normal |
| GSM4626768_GCTCTGTTTCGAGAACG-1 | GSM4626768 | Normal |
| GSM4626768_GCTCTGTTTCGCGTAGC-1 | GSM4626768 | Normal |
| GSM4626768_GCTGCAGAGACCACGA-1  | GSM4626768 | Normal |
| GSM4626768_GCTGCAGAGCGTCAAG-1  | GSM4626768 | Normal |
| GSM4626768_GCTGCAGAGTATCGAA-1  | GSM4626768 | Normal |
| GSM4626768_GCTGCAGCAAGTCTAC-1  | GSM4626768 | Normal |
| GSM4626768_GCTGCAGCACCCAGTG-1  | GSM4626768 | Normal |
| GSM4626768_GCTGCAGGTAGGGACT-1  | GSM4626768 | Normal |
| GSM4626768_GCTGCAGGTTTGTGTG-1  | GSM4626768 | Normal |
| GSM4626768_GCTGCAGTCCGTCATC-1  | GSM4626768 | Normal |
| GSM4626768_GCTGCAGTCCTTTCGG-1  | GSM4626768 | Normal |
| GSM4626768_GCTGCGAAGGGTATCG-1  | GSM4626768 | Normal |
| GSM4626768_GCTGCGAAGGGTTCGAT-1 | GSM4626768 | Normal |
| GSM4626768_GCTGCGACAAGCTGGA-1  | GSM4626768 | Normal |
| GSM4626768_GCTGCGACATATGCTG-1  | GSM4626768 | Normal |
| GSM4626768_GCTGCGACATGTCTCC-1  | GSM4626768 | Normal |
| GSM4626768_GCTGCGAGTAAGCACG-1  | GSM4626768 | Normal |
| GSM4626768_GCTGCGAGTACTTCTT-1  | GSM4626768 | Normal |
| GSM4626768_GCTGCGAGTTAAGTAG-1  | GSM4626768 | Normal |
| GSM4626768_GCTGCGATCTGTGCAA-1  | GSM4626768 | Normal |
| GSM4626768_GCTGCTTAGAGTCTGG-1  | GSM4626768 | Normal |
| GSM4626768_GCTGCTTAGCTATGCT-1  | GSM4626768 | Normal |
| GSM4626768_GCTGCTTACGAGAGT-1   | GSM4626768 | Normal |
| GSM4626768_GCTGCTTCATTAACCG-1  | GSM4626768 | Normal |
| GSM4626768_GCTGCTTGTCTAGGTT-1  | GSM4626768 | Normal |
| GSM4626768_GCTGCTTCTGAGGGA-1   | GSM4626768 | Normal |
| GSM4626768_GCTGGGTAGGAGTTGC-1  | GSM4626768 | Normal |
| GSM4626768_GCTGGGTGTCTCAACA-1  | GSM4626768 | Normal |
| GSM4626768_GCTGGGTGTGTATGGG-1  | GSM4626768 | Normal |
| GSM4626768_GCTGGGTTCCACGTGG-1  | GSM4626768 | Normal |
| GSM4626768_GCTGGGTTCTGTTGAG-1  | GSM4626768 | Normal |
| GSM4626768_GCTTCCACAGCCTTGG-1  | GSM4626768 | Normal |
| GSM4626768_GCTTCCACATACTACG-1  | GSM4626768 | Normal |
| GSM4626768_GCTTCCACATAGAAAC-1  | GSM4626768 | Normal |
| GSM4626768_GCTTCCACATGCAACT-1  | GSM4626768 | Normal |
| GSM4626768_GCTTCCAGTAGCGATG-1  | GSM4626768 | Normal |
| GSM4626768_GCTTCCAGTAGTAGTA-1  | GSM4626768 | Normal |
| GSM4626768_GCTTCCAGTCCAGTGC-1  | GSM4626768 | Normal |
| GSM4626768_GCTTCCAGTGCAGACA-1  | GSM4626768 | Normal |
| GSM4626768_GCTTCCATCAAACCAC-1  | GSM4626768 | Normal |
| GSM4626768_GCTTCCATCAGATAAG-1  | GSM4626768 | Normal |
| GSM4626768_GCTTCCATCATAAAGG-1  | GSM4626768 | Normal |
| GSM4626768_GCTTCCATCGTAGATC-1  | GSM4626768 | Normal |
| GSM4626768_GCTTCCATCTAACCGA-1  | GSM4626768 | Normal |

|                                |            |        |
|--------------------------------|------------|--------|
| GSM4626768_GCTTGAAAGAGTGACC-1  | GSM4626768 | Normal |
| GSM4626768_GCTTGAAAGCGGCTTC-1  | GSM4626768 | Normal |
| GSM4626768_GCTTGAAAGCGTCAAG-1  | GSM4626768 | Normal |
| GSM4626768_GCTTGAAAGGACATTA-1  | GSM4626768 | Normal |
| GSM4626768_GCTTGAACAAGGTGTG-1  | GSM4626768 | Normal |
| GSM4626768_GCTTGAACACCATGTA-1  | GSM4626768 | Normal |
| GSM4626768_GCTTGAACAGATGAGC-1  | GSM4626768 | Normal |
| GSM4626768_GCTTGAACAGGACGTA-1  | GSM4626768 | Normal |
| GSM4626768_GCTTGAACATCCGGGT-1  | GSM4626768 | Normal |
| GSM4626768_GCTTGAAGTATGGTTC-1  | GSM4626768 | Normal |
| GSM4626768_GCTTGAAGTCCATCCT-1  | GSM4626768 | Normal |
| GSM4626768_GCTTGAAGTCCGCTGA-1  | GSM4626768 | Normal |
| GSM4626768_GCTTGAAGTGACGCCT-1  | GSM4626768 | Normal |
| GSM4626768_GCTTGAAGTGCGATAG-1  | GSM4626768 | Normal |
| GSM4626768_GCTTGAATCCAGGGCT-1  | GSM4626768 | Normal |
| GSM4626768_GGAAAGCAGAAGGGTA-1  | GSM4626768 | Normal |
| GSM4626768_GGAAAGCAGCTGCAAG-1  | GSM4626768 | Normal |
| GSM4626768_GGAAAGCCAATCGAAA-1  | GSM4626768 | Normal |
| GSM4626768_GGAAAGCCAGACGCTC-1  | GSM4626768 | Normal |
| GSM4626768_GGAAAGCCAGGTTTCA-1  | GSM4626768 | Normal |
| GSM4626768_GGAAAGCGTAATTGGA-1  | GSM4626768 | Normal |
| GSM4626768_GGAAAGCGTGAGTATA-1  | GSM4626768 | Normal |
| GSM4626768_GGAAAGCTCCACTCCA-1  | GSM4626768 | Normal |
| GSM4626768_GGAAAGCTCTAGCACA-1  | GSM4626768 | Normal |
| GSM4626768_GGAAAGCTCTTCTGGC-1  | GSM4626768 | Normal |
| GSM4626768_GGAACTTAGGTGCAAC-1  | GSM4626768 | Normal |
| GSM4626768_GGAACTTCACTAGTAC-1  | GSM4626768 | Normal |
| GSM4626768_GGAACTTCATCTATGG-1  | GSM4626768 | Normal |
| GSM4626768_GGAACTTGTATAGTAG-1  | GSM4626768 | Normal |
| GSM4626768_GGAACTTGTGCTTCTC-1  | GSM4626768 | Normal |
| GSM4626768_GGAATAAAGCATGGCA-1  | GSM4626768 | Normal |
| GSM4626768_GGAATAACAGGTGCCT-1  | GSM4626768 | Normal |
| GSM4626768_GGACAAGAGATCCGAG-1  | GSM4626768 | Normal |
| GSM4626768_GGACAAGAGGTGTGGT-1  | GSM4626768 | Normal |
| GSM4626768_GGACAAGAGTGAAGTT-1  | GSM4626768 | Normal |
| GSM4626768_GGACAAGCAAGAAGAG-1  | GSM4626768 | Normal |
| GSM4626768_GGACAAGCAAGTAATG-1  | GSM4626768 | Normal |
| GSM4626768_GGACAAGCAAGTCTAC-1  | GSM4626768 | Normal |
| GSM4626768_GGACAAGCATATACGC-1  | GSM4626768 | Normal |
| GSM4626768_GGACAAGCATGGGACA-1  | GSM4626768 | Normal |
| GSM4626768_GGACAAGGTTCGCGAAA-1 | GSM4626768 | Normal |
| GSM4626768_GGACAAGGTGTGACGA-1  | GSM4626768 | Normal |
| GSM4626768_GGACAAGGTTTAGCTG-1  | GSM4626768 | Normal |
| GSM4626768_GGACAAGTCTGTCTAT-1  | GSM4626768 | Normal |
| GSM4626768_GGACAGAAGATATGCA-1  | GSM4626768 | Normal |
| GSM4626768_GGACAGAAGCAGCCTC-1  | GSM4626768 | Normal |
| GSM4626768_GGACAGAAGCCCAATT-1  | GSM4626768 | Normal |
| GSM4626768_GGACAGAAGCTCTCGG-1  | GSM4626768 | Normal |
| GSM4626768_GGACAGAAGTCCATAC-1  | GSM4626768 | Normal |
| GSM4626768_GGACAGAAGTGACATA-1  | GSM4626768 | Normal |
| GSM4626768_GGACAGAAGTGTTAGA-1  | GSM4626768 | Normal |
| GSM4626768_GGACAGAAGTGTTTGC-1  | GSM4626768 | Normal |
| GSM4626768_GGACAGAAGTTCGATC-1  | GSM4626768 | Normal |
| GSM4626768_GGACAGAGTCTTGATG-1  | GSM4626768 | Normal |
| GSM4626768_GGACAGATCAAGAAGT-1  | GSM4626768 | Normal |
| GSM4626768_GGACAGATCACAATGC-1  | GSM4626768 | Normal |
| GSM4626768_GGACAGATCTCTGTGC-1  | GSM4626768 | Normal |



|                                |            |        |
|--------------------------------|------------|--------|
| GSM4626768_GGACAGATCTGCAGTA-1  | GSM4626768 | Normal |
| GSM4626768_GGACAGATCTTTACGT-1  | GSM4626768 | Normal |
| GSM4626768_GGACATTAGATGCCAG-1  | GSM4626768 | Normal |
| GSM4626768_GGACATTAGCGACGTA-1  | GSM4626768 | Normal |
| GSM4626768_GGACATTAGGGAACGG-1  | GSM4626768 | Normal |
| GSM4626768_GGACATTAGCTATTG-1   | GSM4626768 | Normal |
| GSM4626768_GGACATTAGGATTGG-1   | GSM4626768 | Normal |
| GSM4626768_GGACATTGTAAATACG-1  | GSM4626768 | Normal |
| GSM4626768_GGACATTGTATTCGTG-1  | GSM4626768 | Normal |
| GSM4626768_GGACATTGTTATGCGT-1  | GSM4626768 | Normal |
| GSM4626768_GGACATTTTCAGCGATT-1 | GSM4626768 | Normal |
| GSM4626768_GGACATTTTCGAGGTAG-1 | GSM4626768 | Normal |
| GSM4626768_GGACATTTTCGCAAGCC-1 | GSM4626768 | Normal |
| GSM4626768_GGACATTTTCGCACTCT-1 | GSM4626768 | Normal |
| GSM4626768_GGACGTCAGGCATGGT-1  | GSM4626768 | Normal |
| GSM4626768_GGACGTCAGTGGTAGC-1  | GSM4626768 | Normal |
| GSM4626768_GGACGTCATATGGTC-1   | GSM4626768 | Normal |
| GSM4626768_GGACGTCGTAAGAGAG-1  | GSM4626768 | Normal |
| GSM4626768_GGACGTCGTACAGCAG-1  | GSM4626768 | Normal |
| GSM4626768_GGACGTCGTTCGGCTCA-1 | GSM4626768 | Normal |
| GSM4626768_GGACGTCGTTGCGTTA-1  | GSM4626768 | Normal |
| GSM4626768_GGACGTCCTCAGAAGG-1  | GSM4626768 | Normal |
| GSM4626768_GGACGTCCTCTACGAGT-1 | GSM4626768 | Normal |
| GSM4626768_GGAGCAAAGAAGCTCGG-1 | GSM4626768 | Normal |
| GSM4626768_GGAGCAAAGCGATATA-1  | GSM4626768 | Normal |
| GSM4626768_GGAGCAAAGCGCCTCA-1  | GSM4626768 | Normal |
| GSM4626768_GGAGCAAAGCTAGTGG-1  | GSM4626768 | Normal |
| GSM4626768_GGAGCAAAGGGAAACA-1  | GSM4626768 | Normal |
| GSM4626768_GGAGCAACAAGCCGCT-1  | GSM4626768 | Normal |
| GSM4626768_GGAGCAACAATAGAGT-1  | GSM4626768 | Normal |
| GSM4626768_GGAGCAACATGCCTTC-1  | GSM4626768 | Normal |
| GSM4626768_GGAGCAAGTAATAGCA-1  | GSM4626768 | Normal |
| GSM4626768_GGAGCAAGTCAGCTAT-1  | GSM4626768 | Normal |
| GSM4626768_GGAGCAAGTCTCTCGT-1  | GSM4626768 | Normal |
| GSM4626768_GGAGCAAGTGCCTTGG-1  | GSM4626768 | Normal |
| GSM4626768_GGAGCAATCAATCACG-1  | GSM4626768 | Normal |
| GSM4626768_GGAGCAATCACAGTAC-1  | GSM4626768 | Normal |
| GSM4626768_GGAGCAATCTCTGAGA-1  | GSM4626768 | Normal |
| GSM4626768_GGAGCAATCTTAACCT-1  | GSM4626768 | Normal |
| GSM4626768_GGATGTTAGGTAAGTCT-1 | GSM4626768 | Normal |
| GSM4626768_GGATGTTAGGTGTTAA-1  | GSM4626768 | Normal |
| GSM4626768_GGATGTTCAATCGAAA-1  | GSM4626768 | Normal |
| GSM4626768_GGATGTTACCGCTAG-1   | GSM4626768 | Normal |
| GSM4626768_GGATGTTACGGCTGAA-1  | GSM4626768 | Normal |
| GSM4626768_GGATGTTTCATCGGAAG-1 | GSM4626768 | Normal |
| GSM4626768_GGATGTTGTAAACACA-1  | GSM4626768 | Normal |
| GSM4626768_GGATGTTGTTTCGTGAT-1 | GSM4626768 | Normal |
| GSM4626768_GGATGTTGTTTGTGG-1   | GSM4626768 | Normal |
| GSM4626768_GGATGTTTCGCGTTTC-1  | GSM4626768 | Normal |
| GSM4626768_GGATTACAGTAATCCC-1  | GSM4626768 | Normal |
| GSM4626768_GGATTACGTAAGTGGC-1  | GSM4626768 | Normal |
| GSM4626768_GGATTACGTCTCTCTG-1  | GSM4626768 | Normal |
| GSM4626768_GGATTACGTTGTTTGG-1  | GSM4626768 | Normal |
| GSM4626768_GGATTAATCTCTTATG-1  | GSM4626768 | Normal |
| GSM4626768_GGCAATTAGCAGCGTA-1  | GSM4626768 | Normal |
| GSM4626768_GGCAATTCAAGCTGGA-1  | GSM4626768 | Normal |
| GSM4626768_GGCAATTCAGAGCCAA-1  | GSM4626768 | Normal |

|                                |            |        |
|--------------------------------|------------|--------|
| GSM4626768_GGCAATTCATCTACGA-1  | GSM4626768 | Normal |
| GSM4626768_GGCAATTCATTGGGCC-1  | GSM4626768 | Normal |
| GSM4626768_GGCAATTGTAGGACAC-1  | GSM4626768 | Normal |
| GSM4626768_GGCAATTGTTGTGGCC-1  | GSM4626768 | Normal |
| GSM4626768_GGCAATTTCAACACAC-1  | GSM4626768 | Normal |
| GSM4626768_GGCAATTTACCATAG-1   | GSM4626768 | Normal |
| GSM4626768_GGCCGATAGAAGAAGC-1  | GSM4626768 | Normal |
| GSM4626768_GGCCGATAGACTGTAA-1  | GSM4626768 | Normal |
| GSM4626768_GGCCGATAGGTGATTA-1  | GSM4626768 | Normal |
| GSM4626768_GGCCGATAGGTGCAAC-1  | GSM4626768 | Normal |
| GSM4626768_GGCCGATCACGTGAGA-1  | GSM4626768 | Normal |
| GSM4626768_GGCCGATCAGAGCCAA-1  | GSM4626768 | Normal |
| GSM4626768_GGCCGATCAGGGTATG-1  | GSM4626768 | Normal |
| GSM4626768_GGCCGATGTATCTGCA-1  | GSM4626768 | Normal |
| GSM4626768_GGCCGATGTTAGGGTG-1  | GSM4626768 | Normal |
| GSM4626768_GGCCGATTCTGGTATG-1  | GSM4626768 | Normal |
| GSM4626768_GGCGACTAGAGATGAG-1  | GSM4626768 | Normal |
| GSM4626768_GGCGACTAGCACACAG-1  | GSM4626768 | Normal |
| GSM4626768_GGCGACTCAACACGCC-1  | GSM4626768 | Normal |
| GSM4626768_GGCGACTCACATGTGT-1  | GSM4626768 | Normal |
| GSM4626768_GGCGACTGTAGCGTGA-1  | GSM4626768 | Normal |
| GSM4626768_GGCGACTGTGTCGCTG-1  | GSM4626768 | Normal |
| GSM4626768_GGCGACTTACAACGT-1   | GSM4626768 | Normal |
| GSM4626768_GGCGACTTCCCTTGTG-1  | GSM4626768 | Normal |
| GSM4626768_GGCGACTTCGACCAGC-1  | GSM4626768 | Normal |
| GSM4626768_GGCGACTTCGCATGAT-1  | GSM4626768 | Normal |
| GSM4626768_GGCGTGTAGACTGTAA-1  | GSM4626768 | Normal |
| GSM4626768_GGCGTGTAGCGTAGTG-1  | GSM4626768 | Normal |
| GSM4626768_GGCGTGTCACAACTGT-1  | GSM4626768 | Normal |
| GSM4626768_GGCGTGTACGACTCG-1   | GSM4626768 | Normal |
| GSM4626768_GGCGTGTGTGTCTGAT-1  | GSM4626768 | Normal |
| GSM4626768_GGCGTGTGTGTGGTTT-1  | GSM4626768 | Normal |
| GSM4626768_GGCGTGTTCACGCATA-1  | GSM4626768 | Normal |
| GSM4626768_GGCGTGTTCGTTGACA-1  | GSM4626768 | Normal |
| GSM4626768_GGCGTGTCTCCCTGA-1   | GSM4626768 | Normal |
| GSM4626768_GGCTCGAAGGGAACGG-1  | GSM4626768 | Normal |
| GSM4626768_GGCTCGAGTATGAATG-1  | GSM4626768 | Normal |
| GSM4626768_GGCTCGAGTCATATCG-1  | GSM4626768 | Normal |
| GSM4626768_GGCTCGATCAACGGGA-1  | GSM4626768 | Normal |
| GSM4626768_GGCTCGATCCGAGCCA-1  | GSM4626768 | Normal |
| GSM4626768_GGCTCGATCCTGTAGA-1  | GSM4626768 | Normal |
| GSM4626768_GGCTCGATCGGTGTTA-1  | GSM4626768 | Normal |
| GSM4626768_GGCTCGATCTAAGCCA-1  | GSM4626768 | Normal |
| GSM4626768_GGCTGGTAGATCACGG-1  | GSM4626768 | Normal |
| GSM4626768_GGCTGGTAGCTACCGC-1  | GSM4626768 | Normal |
| GSM4626768_GGCTGGTCAAAGGTGC-1  | GSM4626768 | Normal |
| GSM4626768_GGCTGGTCAACTTGAC-1  | GSM4626768 | Normal |
| GSM4626768_GGCTGGTCACTTGGAT-1  | GSM4626768 | Normal |
| GSM4626768_GGCTGGTCAGGAATCG-1  | GSM4626768 | Normal |
| GSM4626768_GGCTGGTCATGTCCTC-1  | GSM4626768 | Normal |
| GSM4626768_GGCTGGTTCAACCATG-1  | GSM4626768 | Normal |
| GSM4626768_GGCTGGTTCACTTACT-1  | GSM4626768 | Normal |
| GSM4626768_GGCTGGTTCACTCCCT-1  | GSM4626768 | Normal |
| GSM4626768_GGCTGGTTCCGCCGTGA-1 | GSM4626768 | Normal |
| GSM4626768_GGCTGGTTCCGCTGATA-1 | GSM4626768 | Normal |
| GSM4626768_GGCTGGTTCCGGAGTA-1  | GSM4626768 | Normal |
| GSM4626768_GGCTGGTTCTAAGCCA-1  | GSM4626768 | Normal |

|                                |            |        |
|--------------------------------|------------|--------|
| GSM4626768_GGGAATGAGCATCATC-1  | GSM4626768 | Normal |
| GSM4626768_GGGAATGAGGGAGTAA-1  | GSM4626768 | Normal |
| GSM4626768_GGGAATGAGTCTCCTC-1  | GSM4626768 | Normal |
| GSM4626768_GGGAATGAGTGTGGCA-1  | GSM4626768 | Normal |
| GSM4626768_GGGAATGAGTGTGTTGC-1 | GSM4626768 | Normal |
| GSM4626768_GGGAATGCAAACGTCT-1  | GSM4626768 | Normal |
| GSM4626768_GGGAATGCAGGACGTA-1  | GSM4626768 | Normal |
| GSM4626768_GGGAATGGTGGTTC-1    | GSM4626768 | Normal |
| GSM4626768_GGGAATGGTTGACAC-1   | GSM4626768 | Normal |
| GSM4626768_GGGAATGTCACGGTTA-1  | GSM4626768 | Normal |
| GSM4626768_GGGAATGTCAGCATGT-1  | GSM4626768 | Normal |
| GSM4626768_GGGAATGTCCGAAGAG-1  | GSM4626768 | Normal |
| GSM4626768_GGGAATGTCCTATTCA-1  | GSM4626768 | Normal |
| GSM4626768_GGGAATGTCTGACCTC-1  | GSM4626768 | Normal |
| GSM4626768_GGGACCTGTGACTACT-1  | GSM4626768 | Normal |
| GSM4626768_GGGACCTGTGTTTGTG-1  | GSM4626768 | Normal |
| GSM4626768_GGGACCTTCAACACAC-1  | GSM4626768 | Normal |
| GSM4626768_GGGACCTTCACTGGGC-1  | GSM4626768 | Normal |
| GSM4626768_GGGACCTTCCTTGCCA-1  | GSM4626768 | Normal |
| GSM4626768_GGGACCTTCGCGATCG-1  | GSM4626768 | Normal |
| GSM4626768_GGGAGATAGACATAAC-1  | GSM4626768 | Normal |
| GSM4626768_GGGAGATAGACTACAA-1  | GSM4626768 | Normal |
| GSM4626768_GGGAGATAGCCGCCTA-1  | GSM4626768 | Normal |
| GSM4626768_GGGAGATAGCCTATGT-1  | GSM4626768 | Normal |
| GSM4626768_GGGAGATAGCGTTAT-1   | GSM4626768 | Normal |
| GSM4626768_GGGAGATAGCTCTCGG-1  | GSM4626768 | Normal |
| GSM4626768_GGGAGATAGGATTCGG-1  | GSM4626768 | Normal |
| GSM4626768_GGGAGATAGTGCATG-1   | GSM4626768 | Normal |
| GSM4626768_GGGAGATCAATGAAAC-1  | GSM4626768 | Normal |
| GSM4626768_GGGAGATCACATAACC-1  | GSM4626768 | Normal |
| GSM4626768_GGGAGATCACCTGGTG-1  | GSM4626768 | Normal |
| GSM4626768_GGGAGATCAGACAAGC-1  | GSM4626768 | Normal |
| GSM4626768_GGGAGATCATAGGATA-1  | GSM4626768 | Normal |
| GSM4626768_GGGAGATGTCGCTTTC-1  | GSM4626768 | Normal |
| GSM4626768_GGGAGATGTGGCTCCA-1  | GSM4626768 | Normal |
| GSM4626768_GGGAGATTCGCTTGTC-1  | GSM4626768 | Normal |
| GSM4626768_GGGATGAAGTCACTCT-1  | GSM4626768 | Normal |
| GSM4626768_GGGATGAAGTCAATAG-1  | GSM4626768 | Normal |
| GSM4626768_GGGATGAAGTGCGTGA-1  | GSM4626768 | Normal |
| GSM4626768_GGGATGACATATGAGA-1  | GSM4626768 | Normal |
| GSM4626768_GGGATGACATGGGAAC-1  | GSM4626768 | Normal |
| GSM4626768_GGGATGATCGCATGAT-1  | GSM4626768 | Normal |
| GSM4626768_GGGATGATCGGTGTCG-1  | GSM4626768 | Normal |
| GSM4626768_GGGCACTAGCAATCTC-1  | GSM4626768 | Normal |
| GSM4626768_GGGCACTAGCGCCTTG-1  | GSM4626768 | Normal |
| GSM4626768_GGGCACTAGGAGTTGC-1  | GSM4626768 | Normal |
| GSM4626768_GGGCACTAGTAGCCGA-1  | GSM4626768 | Normal |
| GSM4626768_GGGCACTAGTGAGAA-1   | GSM4626768 | Normal |
| GSM4626768_GGGCACTCAATGAATG-1  | GSM4626768 | Normal |
| GSM4626768_GGGCACTGTTCCACGG-1  | GSM4626768 | Normal |
| GSM4626768_GGGCACTTCAAACCGT-1  | GSM4626768 | Normal |
| GSM4626768_GGGCACTTCAAGCATA-1  | GSM4626768 | Normal |
| GSM4626768_GGGCATCAGATAGCAT-1  | GSM4626768 | Normal |
| GSM4626768_GGGCATCAGCCCGAAA-1  | GSM4626768 | Normal |
| GSM4626768_GGGCATCAGTTACCCA-1  | GSM4626768 | Normal |
| GSM4626768_GGGCATCGTCTGATTG-1  | GSM4626768 | Normal |
| GSM4626768_GGGCATCGTTGCTCCT-1  | GSM4626768 | Normal |

|                               |            |        |
|-------------------------------|------------|--------|
| GSM4626768_GGGCATCTCAACACGT-1 | GSM4626768 | Normal |
| GSM4626768_GGGTCTGAGAGCTGGT-1 | GSM4626768 | Normal |
| GSM4626768_GGGTCTGAGTATGACA-1 | GSM4626768 | Normal |
| GSM4626768_GGGTCTGAGTGGAGTC-1 | GSM4626768 | Normal |
| GSM4626768_GGGTCTGCACTGTGTA-1 | GSM4626768 | Normal |
| GSM4626768_GGGTCTGCATGGATGG-1 | GSM4626768 | Normal |
| GSM4626768_GGGTCTGCATTAGGCT-1 | GSM4626768 | Normal |
| GSM4626768_GGGTCTGGTCGGGTCT-1 | GSM4626768 | Normal |
| GSM4626768_GGGTCTGTCGGCATCG-1 | GSM4626768 | Normal |
| GSM4626768_GGGTTGCAGAAACCTA-1 | GSM4626768 | Normal |
| GSM4626768_GGGTTGCAGCGAGAAA-1 | GSM4626768 | Normal |
| GSM4626768_GGGTTGCAGGCGACAT-1 | GSM4626768 | Normal |
| GSM4626768_GGGTTGCAGTACATGA-1 | GSM4626768 | Normal |
| GSM4626768_GGGTTGCCAACAACT-1  | GSM4626768 | Normal |
| GSM4626768_GGGTTGCCAACTTGAC-1 | GSM4626768 | Normal |
| GSM4626768_GGGTTGCCAGCTGTTA-1 | GSM4626768 | Normal |
| GSM4626768_GGGTTGCGTCAATGTC-1 | GSM4626768 | Normal |
| GSM4626768_GGGTTGCTCAACACAC-1 | GSM4626768 | Normal |
| GSM4626768_GGGTTGCTCACAGGCC-1 | GSM4626768 | Normal |
| GSM4626768_GGGTTGCTCAGCAACT-1 | GSM4626768 | Normal |
| GSM4626768_GGGTTGCTCCCTGACT-1 | GSM4626768 | Normal |
| GSM4626768_GGGTTGCTCCGAGCCA-1 | GSM4626768 | Normal |
| GSM4626768_GGGTTGCTCTTACCGC-1 | GSM4626768 | Normal |
| GSM4626768_GGTATTGCACAGACAG-1 | GSM4626768 | Normal |
| GSM4626768_GGTATTGCAGCTGGCT-1 | GSM4626768 | Normal |
| GSM4626768_GGTATTGCAGGCGATA-1 | GSM4626768 | Normal |
| GSM4626768_GGTATTGTCTCTAGC-1  | GSM4626768 | Normal |
| GSM4626768_GGTATTGTCTTCTTC-1  | GSM4626768 | Normal |
| GSM4626768_GGTGAAGAGAACTGTA-1 | GSM4626768 | Normal |
| GSM4626768_GGTGAAGAGCCGTCGT-1 | GSM4626768 | Normal |
| GSM4626768_GGTGAAGAGCTAGTCT-1 | GSM4626768 | Normal |
| GSM4626768_GGTGAAGAGGCCGAAT-1 | GSM4626768 | Normal |
| GSM4626768_GGTGAAGCAAGACACG-1 | GSM4626768 | Normal |
| GSM4626768_GGTGAAGTCAGTTTGG-1 | GSM4626768 | Normal |
| GSM4626768_GGTGAAGTCCTCCTAG-1 | GSM4626768 | Normal |
| GSM4626768_GGTGAAGTCGGAAATA-1 | GSM4626768 | Normal |
| GSM4626768_GGTGCGTCACGAAATA-1 | GSM4626768 | Normal |
| GSM4626768_GGTGCGTCAGCTTAAC-1 | GSM4626768 | Normal |
| GSM4626768_GGTGCGTGCAATACC-1  | GSM4626768 | Normal |
| GSM4626768_GGTGCGTGCTCTTTC-1  | GSM4626768 | Normal |
| GSM4626768_GGTGCGTTCAACACCA-1 | GSM4626768 | Normal |
| GSM4626768_GGTGCGTTCGCAAGC-1  | GSM4626768 | Normal |
| GSM4626768_GGTGCGTTCGCGAC-1   | GSM4626768 | Normal |
| GSM4626768_GGTGTTAAGACTGTAA-1 | GSM4626768 | Normal |
| GSM4626768_GGTGTTAAGCTGTTCA-1 | GSM4626768 | Normal |
| GSM4626768_GGTGTTAAGGACAGAA-1 | GSM4626768 | Normal |
| GSM4626768_GGTGTTACAACGATCT-1 | GSM4626768 | Normal |
| GSM4626768_GGTGTTACAAGGTGTG-1 | GSM4626768 | Normal |
| GSM4626768_GGTGTTACACCGTTGG-1 | GSM4626768 | Normal |
| GSM4626768_GGTGTTAGTCTTGATG-1 | GSM4626768 | Normal |
| GSM4626768_GGTGTTAGTTTGTTC-1  | GSM4626768 | Normal |
| GSM4626768_GGTGTTATCTGCGTAA-1 | GSM4626768 | Normal |
| GSM4626768_GTAACGTAGCGATTCT-1 | GSM4626768 | Normal |
| GSM4626768_GTAACGTAGGGAACGG-1 | GSM4626768 | Normal |
| GSM4626768_GTAACGTAGTGGAGAA-1 | GSM4626768 | Normal |
| GSM4626768_GTAACGTCACGAGAGT-1 | GSM4626768 | Normal |
| GSM4626768_GTAACGTCATACAGCT-1 | GSM4626768 | Normal |

|                               |            |        |
|-------------------------------|------------|--------|
| GSM4626768_GTAACGTGTAATCACC-1 | GSM4626768 | Normal |
| GSM4626768_GTAACGTGTACAGTGG-1 | GSM4626768 | Normal |
| GSM4626768_GTAACGTGTACTTAGC-1 | GSM4626768 | Normal |
| GSM4626768_GTAACGTGTATAGGTA-1 | GSM4626768 | Normal |
| GSM4626768_GTAACGTGTCTAGCCG-1 | GSM4626768 | Normal |
| GSM4626768_GTAACGTTCAAGGTA-1  | GSM4626768 | Normal |
| GSM4626768_GTAACGTTCTCGTATT-1 | GSM4626768 | Normal |
| GSM4626768_GTAACTGAGAGCTATA-1 | GSM4626768 | Normal |
| GSM4626768_GTAACTGAGATCACGG-1 | GSM4626768 | Normal |
| GSM4626768_GTAACTGAGCTAGCCC-1 | GSM4626768 | Normal |
| GSM4626768_GTAACTGAGGATGTAT-1 | GSM4626768 | Normal |
| GSM4626768_GTAACTGCAAGCCATT-1 | GSM4626768 | Normal |
| GSM4626768_GTAACTGCACCAGGCT-1 | GSM4626768 | Normal |
| GSM4626768_GTAACTGCAGGCGATA-1 | GSM4626768 | Normal |
| GSM4626768_GTAACTGCATGTAGTC-1 | GSM4626768 | Normal |
| GSM4626768_GTAACTGGTATCGCAT-1 | GSM4626768 | Normal |
| GSM4626768_GTAACTGGTCCCTACT-1 | GSM4626768 | Normal |
| GSM4626768_GTAACTGGTCTGGAGA-1 | GSM4626768 | Normal |
| GSM4626768_GTAACTGGTGCACCAC-1 | GSM4626768 | Normal |
| GSM4626768_GTAACTGTCAAACCAC-1 | GSM4626768 | Normal |
| GSM4626768_GTAACTGTCAAACGGG-1 | GSM4626768 | Normal |
| GSM4626768_GTAACTGTCGCCAGCA-1 | GSM4626768 | Normal |
| GSM4626768_GTACGTAAGAGTACAT-1 | GSM4626768 | Normal |
| GSM4626768_GTACGTAAGATTACCC-1 | GSM4626768 | Normal |
| GSM4626768_GTACGTACAGGCGATA-1 | GSM4626768 | Normal |
| GSM4626768_GTACGTACATTGCGGC-1 | GSM4626768 | Normal |
| GSM4626768_GTACGTAGTCCGAACC-1 | GSM4626768 | Normal |
| GSM4626768_GTACGTAGTGATGTGG-1 | GSM4626768 | Normal |
| GSM4626768_GTACGTAGTTTAAGCC-1 | GSM4626768 | Normal |
| GSM4626768_GTACGTATCACGCGGT-1 | GSM4626768 | Normal |
| GSM4626768_GTACGTATCTATCCTA-1 | GSM4626768 | Normal |
| GSM4626768_GTACTCCCACAGCGTC-1 | GSM4626768 | Normal |
| GSM4626768_GTACTCCCAGGGTACA-1 | GSM4626768 | Normal |
| GSM4626768_GTACTCCTCGTCTGAA-1 | GSM4626768 | Normal |
| GSM4626768_GTACTTTAGGCATTGG-1 | GSM4626768 | Normal |
| GSM4626768_GTACTTTAGTGGGATC-1 | GSM4626768 | Normal |
| GSM4626768_GTACTTTCAATAGCAA-1 | GSM4626768 | Normal |
| GSM4626768_GTACTTTGTAGGCTGA-1 | GSM4626768 | Normal |
| GSM4626768_GTACTTTGTCAGCTAT-1 | GSM4626768 | Normal |
| GSM4626768_GTACTTTGTGCTCTTC-1 | GSM4626768 | Normal |
| GSM4626768_GTACTTTGTTAGATGA-1 | GSM4626768 | Normal |
| GSM4626768_GTACTTTGTTACGCGC-1 | GSM4626768 | Normal |
| GSM4626768_GTACTTTTCGGTGTTA-1 | GSM4626768 | Normal |
| GSM4626768_GTAGGCCAGCGATAGC-1 | GSM4626768 | Normal |
| GSM4626768_GTAGGCCAGCGCTTC-1  | GSM4626768 | Normal |
| GSM4626768_GTAGGCCAGGAATTAC-1 | GSM4626768 | Normal |
| GSM4626768_GTAGGCCAGTGAAGTT-1 | GSM4626768 | Normal |
| GSM4626768_GTAGGCCAGTGTCTCA-1 | GSM4626768 | Normal |
| GSM4626768_GTAGGCCGTCGCGAAA-1 | GSM4626768 | Normal |
| GSM4626768_GTAGGCCTCAGCGACC-1 | GSM4626768 | Normal |
| GSM4626768_GTAGGCCTCCCTAATT-1 | GSM4626768 | Normal |
| GSM4626768_GTAGGCCTCGTACCGG-1 | GSM4626768 | Normal |
| GSM4626768_GTAGTCAAGAGAACAG-1 | GSM4626768 | Normal |
| GSM4626768_GTAGTCAAGATGCGAC-1 | GSM4626768 | Normal |
| GSM4626768_GTAGTCAAGGGAAACA-1 | GSM4626768 | Normal |
| GSM4626768_GTAGTCACAAAGTGCG-1 | GSM4626768 | Normal |
| GSM4626768_GTAGTCACACGGTAGA-1 | GSM4626768 | Normal |

|                                |            |        |
|--------------------------------|------------|--------|
| GSM4626768_GTAGTCACAGTAAGCG-1  | GSM4626768 | Normal |
| GSM4626768_GTAGTCACAGTACACT-1  | GSM4626768 | Normal |
| GSM4626768_GTAGTCACATCAGTCA-1  | GSM4626768 | Normal |
| GSM4626768_GTAGTCAGTGTTTGTG-1  | GSM4626768 | Normal |
| GSM4626768_GTAGTCAGTTAGTGGG-1  | GSM4626768 | Normal |
| GSM4626768_GTAGTCATCCAAATGC-1  | GSM4626768 | Normal |
| GSM4626768_GTAGTCATCGGAGCAA-1  | GSM4626768 | Normal |
| GSM4626768_GTATCTTAGCGTTCCG-1  | GSM4626768 | Normal |
| GSM4626768_GTATCTTAGTCCGTAT-1  | GSM4626768 | Normal |
| GSM4626768_GTATCTTAGTGAACGC-1  | GSM4626768 | Normal |
| GSM4626768_GTATCTTCACTCTGTC-1  | GSM4626768 | Normal |
| GSM4626768_GTATCTTCAGTGGGAT-1  | GSM4626768 | Normal |
| GSM4626768_GTATCTTCATACGCCG-1  | GSM4626768 | Normal |
| GSM4626768_GTATCTTCATCGGTTA-1  | GSM4626768 | Normal |
| GSM4626768_GTATCTTCATTGGTAC-1  | GSM4626768 | Normal |
| GSM4626768_GTATCTTGTCATGCCG-1  | GSM4626768 | Normal |
| GSM4626768_GTATCTTGTGTAATGA-1  | GSM4626768 | Normal |
| GSM4626768_GTATCTTGTTACGGAG-1  | GSM4626768 | Normal |
| GSM4626768_GTATCTTTCCAAAGTC-1  | GSM4626768 | Normal |
| GSM4626768_GTATCTTTCTGTTACGA-1 | GSM4626768 | Normal |
| GSM4626768_GTATCTTTCTTGACGA-1  | GSM4626768 | Normal |
| GSM4626768_GTATTCTAGACCCACC-1  | GSM4626768 | Normal |
| GSM4626768_GTATTCTAGCCTCGTG-1  | GSM4626768 | Normal |
| GSM4626768_GTATTCTAGCTAGGCA-1  | GSM4626768 | Normal |
| GSM4626768_GTATTCTCAGCCAATT-1  | GSM4626768 | Normal |
| GSM4626768_GTATTCTGTGCGGTT-1   | GSM4626768 | Normal |
| GSM4626768_GTATTCTGTTAAAGTG-1  | GSM4626768 | Normal |
| GSM4626768_GTATTCTGTTATTCTC-1  | GSM4626768 | Normal |
| GSM4626768_GTATTCTGTTGGACA-1   | GSM4626768 | Normal |
| GSM4626768_GTATTCTGTTTGTTC-1   | GSM4626768 | Normal |
| GSM4626768_GTATTCTTCAGAGCTT-1  | GSM4626768 | Normal |
| GSM4626768_GTATTCTTCCGTAGTA-1  | GSM4626768 | Normal |
| GSM4626768_GTCAAGTAGAGCTATA-1  | GSM4626768 | Normal |
| GSM4626768_GTCAAGTAGCACGCCT-1  | GSM4626768 | Normal |
| GSM4626768_GTCAAGTGTCGGCATC-1  | GSM4626768 | Normal |
| GSM4626768_GTCAAGTGCTAGCCG-1   | GSM4626768 | Normal |
| GSM4626768_GTCAAGTTCAACCATG-1  | GSM4626768 | Normal |
| GSM4626768_GTCAAGTTCGCATGGC-1  | GSM4626768 | Normal |
| GSM4626768_GTCAAGTTCGGATGTT-1  | GSM4626768 | Normal |
| GSM4626768_GTCAAGTTCGGCATCG-1  | GSM4626768 | Normal |
| GSM4626768_GTCACAAAGATGGGTC-1  | GSM4626768 | Normal |
| GSM4626768_GTCACAAAGTGTAAT-1   | GSM4626768 | Normal |
| GSM4626768_GTCACAAAGTTGAGTA-1  | GSM4626768 | Normal |
| GSM4626768_GTCACAACAGACAAAT-1  | GSM4626768 | Normal |
| GSM4626768_GTCACAACAGACGCAA-1  | GSM4626768 | Normal |
| GSM4626768_GTCACAAGTCCAATA-1   | GSM4626768 | Normal |
| GSM4626768_GTCACAAGTGCCTGCA-1  | GSM4626768 | Normal |
| GSM4626768_GTCACAAGTGCCTTGG-1  | GSM4626768 | Normal |
| GSM4626768_GTCACAAGTGGTAACG-1  | GSM4626768 | Normal |
| GSM4626768_GTCACAAGTTAAAGAC-1  | GSM4626768 | Normal |
| GSM4626768_GTCACAATCGATGAGG-1  | GSM4626768 | Normal |
| GSM4626768_GTCACAATCGCAAGCC-1  | GSM4626768 | Normal |
| GSM4626768_GTCACAATCGCTTAGA-1  | GSM4626768 | Normal |
| GSM4626768_GTCACAATCTACGAGT-1  | GSM4626768 | Normal |
| GSM4626768_GTCACGGAGATGCCAG-1  | GSM4626768 | Normal |
| GSM4626768_GTCACGGAGTAATCCC-1  | GSM4626768 | Normal |
| GSM4626768_GTCACGGCATACTCTT-1  | GSM4626768 | Normal |

|                                |            |        |
|--------------------------------|------------|--------|
| GSM4626768_GTCACGGGTAGCGTAG-1  | GSM4626768 | Normal |
| GSM4626768_GTCACGGGTGCCTGGT-1  | GSM4626768 | Normal |
| GSM4626768_GTCACGGGTGTGGTTT-1  | GSM4626768 | Normal |
| GSM4626768_GTCACGGGTTTCCACC-1  | GSM4626768 | Normal |
| GSM4626768_GTCACGGTCTGTGCAA-1  | GSM4626768 | Normal |
| GSM4626768_GTCACGGTCTTAGAGC-1  | GSM4626768 | Normal |
| GSM4626768_GTCACGGTCTTAGCCC-1  | GSM4626768 | Normal |
| GSM4626768_GTCATTTAGATGTCCG-1  | GSM4626768 | Normal |
| GSM4626768_GTCATTTAGCCAGAAC-1  | GSM4626768 | Normal |
| GSM4626768_GTCATTTAGCCCAATT-1  | GSM4626768 | Normal |
| GSM4626768_GTCATTTAGGAATCGC-1  | GSM4626768 | Normal |
| GSM4626768_GTCATTTAGGGCATGT-1  | GSM4626768 | Normal |
| GSM4626768_GTCATTTCAACGCACC-1  | GSM4626768 | Normal |
| GSM4626768_GTCATTTCAAGCGATG-1  | GSM4626768 | Normal |
| GSM4626768_GTCATTTGTCTAGTCA-1  | GSM4626768 | Normal |
| GSM4626768_GTCATTTGTCTGCAAT-1  | GSM4626768 | Normal |
| GSM4626768_GTCATTTGTTCCACAA-1  | GSM4626768 | Normal |
| GSM4626768_GTCATTTGTTGTGGAG-1  | GSM4626768 | Normal |
| GSM4626768_GTCATTTTCAATACCG-1  | GSM4626768 | Normal |
| GSM4626768_GTCCTCAAGGCATTGG-1  | GSM4626768 | Normal |
| GSM4626768_GTCCTCACATATGAGA-1  | GSM4626768 | Normal |
| GSM4626768_GTCCTCAGTCCAAGTT-1  | GSM4626768 | Normal |
| GSM4626768_GTCCTCAGTCGAGATG-1  | GSM4626768 | Normal |
| GSM4626768_GTCCTCAGTTACCGAT-1  | GSM4626768 | Normal |
| GSM4626768_GTCCTCAGTTATGCGT-1  | GSM4626768 | Normal |
| GSM4626768_GTCCTCAGTTCGTTGA-1  | GSM4626768 | Normal |
| GSM4626768_GTCCTCATCTTTAGTC-1  | GSM4626768 | Normal |
| GSM4626768_GTCGGGTAGGCGATAC-1  | GSM4626768 | Normal |
| GSM4626768_GTCGGGTAGGTGTGGT-1  | GSM4626768 | Normal |
| GSM4626768_GTCGGGTAGTACGATA-1  | GSM4626768 | Normal |
| GSM4626768_GTCGGGTCAAGTCTAC-1  | GSM4626768 | Normal |
| GSM4626768_GTCGGGTCACTACGA-1   | GSM4626768 | Normal |
| GSM4626768_GTCGGGTGCCATGAT-1   | GSM4626768 | Normal |
| GSM4626768_GTCGGGTGTGTGCGTC-1  | GSM4626768 | Normal |
| GSM4626768_GTCGGGTTCAACTG-1    | GSM4626768 | Normal |
| GSM4626768_GTCGGGTTCCATTCA-1   | GSM4626768 | Normal |
| GSM4626768_GTCGGGTTCGTTACAG-1  | GSM4626768 | Normal |
| GSM4626768_GTCGTAAAGCGTAATA-1  | GSM4626768 | Normal |
| GSM4626768_GTCGTAAAGCGTGAAC-1  | GSM4626768 | Normal |
| GSM4626768_GTCGTAAACAAGCGT-1   | GSM4626768 | Normal |
| GSM4626768_GTCGTAAACATGCCGA-1  | GSM4626768 | Normal |
| GSM4626768_GTCGTAAACATGTTCCC-1 | GSM4626768 | Normal |
| GSM4626768_GTCGTAAAGTATGCTTG-1 | GSM4626768 | Normal |
| GSM4626768_GTCGTAAAGTGGCCCTA-1 | GSM4626768 | Normal |
| GSM4626768_GTCGTAAAGTGTGAATA-1 | GSM4626768 | Normal |
| GSM4626768_GTCGTAAAGTGTGACGA-1 | GSM4626768 | Normal |
| GSM4626768_GTCGTAAATCTTATCTG-1 | GSM4626768 | Normal |
| GSM4626768_GTCGTAAATCTTGACGA-1 | GSM4626768 | Normal |
| GSM4626768_GTCGTAAATCTTTAGTC-1 | GSM4626768 | Normal |
| GSM4626768_GTCTCGTAGCGATTCT-1  | GSM4626768 | Normal |
| GSM4626768_GTCTCGTAGGATGTAT-1  | GSM4626768 | Normal |
| GSM4626768_GTCTCGTAGTATCGAA-1  | GSM4626768 | Normal |
| GSM4626768_GTCTCGTAGTATGACA-1  | GSM4626768 | Normal |
| GSM4626768_GTCTCGTCAGAGTGTG-1  | GSM4626768 | Normal |
| GSM4626768_GTCTCGTCAGGACCCT-1  | GSM4626768 | Normal |
| GSM4626768_GTCTCGTGTACTCAAC-1  | GSM4626768 | Normal |
| GSM4626768_GTCTCGTTC AAGGCTT-1 | GSM4626768 | Normal |

|                               |            |        |
|-------------------------------|------------|--------|
| GSM4626768_GTCTCGTTCGTTGTC-1  | GSM4626768 | Normal |
| GSM4626768_GTCTTCGAGTACTTGC-1 | GSM4626768 | Normal |
| GSM4626768_GTCTTCGCACAGAGGT-1 | GSM4626768 | Normal |
| GSM4626768_GTCTTCGCATGCCACG-1 | GSM4626768 | Normal |
| GSM4626768_GTCTTCGGTGCAACGA-1 | GSM4626768 | Normal |
| GSM4626768_GTCTTCGTCATTGCC-1  | GSM4626768 | Normal |
| GSM4626768_GTCTTCGTCGATGAGG-1 | GSM4626768 | Normal |
| GSM4626768_GTCTTCGTCGTGGGAA-1 | GSM4626768 | Normal |
| GSM4626768_GTCTTCGTCTCAAACG-1 | GSM4626768 | Normal |
| GSM4626768_GTGAAGGAGAATGTTG-1 | GSM4626768 | Normal |
| GSM4626768_GTGAAGGAGAGCTGCA-1 | GSM4626768 | Normal |
| GSM4626768_GTGAAGGCAAGACGTG-1 | GSM4626768 | Normal |
| GSM4626768_GTGAAGGCAAGGACAC-1 | GSM4626768 | Normal |
| GSM4626768_GTGAAGGCACTTCTGC-1 | GSM4626768 | Normal |
| GSM4626768_GTGAAGGGTCCCTTGT-1 | GSM4626768 | Normal |
| GSM4626768_GTGAAGGGTCCGACGT-1 | GSM4626768 | Normal |
| GSM4626768_GTGAAGGGTCCGTGAC-1 | GSM4626768 | Normal |
| GSM4626768_GTGAAGGGTCTTGTCC-1 | GSM4626768 | Normal |
| GSM4626768_GTGAAGGTCACAACGT-1 | GSM4626768 | Normal |
| GSM4626768_GTGAAGGTCATGGTCA-1 | GSM4626768 | Normal |
| GSM4626768_GTGAAGGTCCTCTAGC-1 | GSM4626768 | Normal |
| GSM4626768_GTGCAGCAGCGACGTA-1 | GSM4626768 | Normal |
| GSM4626768_GTGCAGCAGTTGCAGG-1 | GSM4626768 | Normal |
| GSM4626768_GTGCAGCCATCTATGG-1 | GSM4626768 | Normal |
| GSM4626768_GTGCAGCGTAACGCGA-1 | GSM4626768 | Normal |
| GSM4626768_GTGCAGCGTAGCAAAT-1 | GSM4626768 | Normal |
| GSM4626768_GTGCAGCGTATGAATG-1 | GSM4626768 | Normal |
| GSM4626768_GTGCAGCGTCGCCATG-1 | GSM4626768 | Normal |
| GSM4626768_GTGCAGCGTGAAATCA-1 | GSM4626768 | Normal |
| GSM4626768_GTGCAGCTCTGATACG-1 | GSM4626768 | Normal |
| GSM4626768_GTGCATAAGAGGTACC-1 | GSM4626768 | Normal |
| GSM4626768_GTGCATAAGGCCGAAT-1 | GSM4626768 | Normal |
| GSM4626768_GTGCATAAGTACGTTC-1 | GSM4626768 | Normal |
| GSM4626768_GTGCATAAGTCAAGGC-1 | GSM4626768 | Normal |
| GSM4626768_GTGCATAGTAAGAGGA-1 | GSM4626768 | Normal |
| GSM4626768_GTGCATAGTACCGAGA-1 | GSM4626768 | Normal |
| GSM4626768_GTGCATAGTCTCAACA-1 | GSM4626768 | Normal |
| GSM4626768_GTGCATAGTCTGCCAG-1 | GSM4626768 | Normal |
| GSM4626768_GTGCATAGTTACTGAC-1 | GSM4626768 | Normal |
| GSM4626768_GTGCATATCCTTCAAT-1 | GSM4626768 | Normal |
| GSM4626768_GTGCATATCGCACTCT-1 | GSM4626768 | Normal |
| GSM4626768_GTGCATATCGTTTATC-1 | GSM4626768 | Normal |
| GSM4626768_GTGCGGTGTAATTGGA-1 | GSM4626768 | Normal |
| GSM4626768_GTGCGGTGTGCGAAAC-1 | GSM4626768 | Normal |
| GSM4626768_GTGCGGTTCCATTTA-1  | GSM4626768 | Normal |
| GSM4626768_GTGCTTCAGCAATCTC-1 | GSM4626768 | Normal |
| GSM4626768_GTGCTTCAGCTGAAAT-1 | GSM4626768 | Normal |
| GSM4626768_GTGCTTCAGGGCTTGA-1 | GSM4626768 | Normal |
| GSM4626768_GTGCTTCAGTATGACA-1 | GSM4626768 | Normal |
| GSM4626768_GTGCTTCCAAGGACAC-1 | GSM4626768 | Normal |
| GSM4626768_GTGCTTCCATATACGC-1 | GSM4626768 | Normal |
| GSM4626768_GTGCTTCCATGGTAGG-1 | GSM4626768 | Normal |
| GSM4626768_GTGCTTCCATTGCGGC-1 | GSM4626768 | Normal |
| GSM4626768_GTGCTTCGTCAGCTAT-1 | GSM4626768 | Normal |
| GSM4626768_GTGCTTCGTCGGTTAA-1 | GSM4626768 | Normal |
| GSM4626768_GTGCTTCGTGCATCTA-1 | GSM4626768 | Normal |
| GSM4626768_GTGCTTCTCTGTTTGT-1 | GSM4626768 | Normal |



|                                |            |        |
|--------------------------------|------------|--------|
| GSM4626768_GTGGGTCCAAAGGAAG-1  | GSM4626768 | Normal |
| GSM4626768_GTGGGTCCAATCACAC-1  | GSM4626768 | Normal |
| GSM4626768_GTGGGTCTGATGCTTG-1  | GSM4626768 | Normal |
| GSM4626768_GTGGGTCTGAAAGA-1    | GSM4626768 | Normal |
| GSM4626768_GTGGGTCTCATGCTCC-1  | GSM4626768 | Normal |
| GSM4626768_GTGGGTCTCGCATGAT-1  | GSM4626768 | Normal |
| GSM4626768_GTGGGTCTCTATCGCC-1  | GSM4626768 | Normal |
| GSM4626768_GTGTGCGAGAGTTAT-1   | GSM4626768 | Normal |
| GSM4626768_GTGTGCGAGAGTGAGA-1  | GSM4626768 | Normal |
| GSM4626768_GTGTGCGAGTTACGGG-1  | GSM4626768 | Normal |
| GSM4626768_GTGTGCGCAAGTTCT-1   | GSM4626768 | Normal |
| GSM4626768_GTGTGCGCAGCGTCCA-1  | GSM4626768 | Normal |
| GSM4626768_GTGTGCGCAGTCCTTC-1  | GSM4626768 | Normal |
| GSM4626768_GTGTGCGGTCAGCTAT-1  | GSM4626768 | Normal |
| GSM4626768_GTGTGCGGTGCTAGCC-1  | GSM4626768 | Normal |
| GSM4626768_GTGTGCGGTGGTCTCG-1  | GSM4626768 | Normal |
| GSM4626768_GTGTGCGGTGTCTGAT-1  | GSM4626768 | Normal |
| GSM4626768_GTGTGCGGTTCAATC-1   | GSM4626768 | Normal |
| GSM4626768_GTGTGCGGTTCTGTTT-1  | GSM4626768 | Normal |
| GSM4626768_GTGTGCGTCACAACGT-1  | GSM4626768 | Normal |
| GSM4626768_GTGTGCGTCAGTACGT-1  | GSM4626768 | Normal |
| GSM4626768_GTGTTAGAGTCGATAA-1  | GSM4626768 | Normal |
| GSM4626768_GTGTTAGCAAGCTGAG-1  | GSM4626768 | Normal |
| GSM4626768_GTGTTAGGTAAGGGCT-1  | GSM4626768 | Normal |
| GSM4626768_GTGTTAGGTACTTCTT-1  | GSM4626768 | Normal |
| GSM4626768_GTGTTAGGTAGTACCT-1  | GSM4626768 | Normal |
| GSM4626768_GTGTTAGGTATATGGA-1  | GSM4626768 | Normal |
| GSM4626768_GTTAAGCAGAGACGAA-1  | GSM4626768 | Normal |
| GSM4626768_GTTAAGCAGGCTAGCA-1  | GSM4626768 | Normal |
| GSM4626768_GTTAAGCAGGGCTTGA-1  | GSM4626768 | Normal |
| GSM4626768_GTTAAGCAGTGGACGT-1  | GSM4626768 | Normal |
| GSM4626768_GTTAAGCCAAGCGTAG-1  | GSM4626768 | Normal |
| GSM4626768_GTTAAGCCAATGGACG-1  | GSM4626768 | Normal |
| GSM4626768_GTTAAGCCAGAAGCAC-1  | GSM4626768 | Normal |
| GSM4626768_GTTAAGCGTAAATGTG-1  | GSM4626768 | Normal |
| GSM4626768_GTTAAGCGTATCTGCA-1  | GSM4626768 | Normal |
| GSM4626768_GTTAAGCGTGTTTCGAT-1 | GSM4626768 | Normal |
| GSM4626768_GTTAAGCGTTGCTCCT-1  | GSM4626768 | Normal |
| GSM4626768_GTTAAGCGTTGTCTTT-1  | GSM4626768 | Normal |
| GSM4626768_GTTAAGCTCAGTACGT-1  | GSM4626768 | Normal |
| GSM4626768_GTTAAGCTCATCGGAT-1  | GSM4626768 | Normal |
| GSM4626768_GTTAAGCTCGCAAGCC-1  | GSM4626768 | Normal |
| GSM4626768_GTTACAGAGACAGAGA-1  | GSM4626768 | Normal |
| GSM4626768_GTTACAGAGCTGTTCA-1  | GSM4626768 | Normal |
| GSM4626768_GTTACAGAGGAGCGTT-1  | GSM4626768 | Normal |
| GSM4626768_GTTACAGAGGTGCACA-1  | GSM4626768 | Normal |
| GSM4626768_GTTACAGCAAGAAAGG-1  | GSM4626768 | Normal |
| GSM4626768_GTTACAGCAGCTGTTA-1  | GSM4626768 | Normal |
| GSM4626768_GTTACAGGTCAGTGGC-1  | GSM4626768 | Normal |
| GSM4626768_GTTCATTAGCAGATCG-1  | GSM4626768 | Normal |
| GSM4626768_GTTCATTAGGTCATCT-1  | GSM4626768 | Normal |
| GSM4626768_GTTCATTAGTACGTAA-1  | GSM4626768 | Normal |
| GSM4626768_GTTCATTCAATGAATG-1  | GSM4626768 | Normal |
| GSM4626768_GTTCATTCAACTGT-1    | GSM4626768 | Normal |
| GSM4626768_GTTCATTACATAACC-1   | GSM4626768 | Normal |
| GSM4626768_GTTCATTGATGCGCAC-1  | GSM4626768 | Normal |
| GSM4626768_GTTCATTGTAACGACG-1  | GSM4626768 | Normal |

|                                |            |        |
|--------------------------------|------------|--------|
| GSM4626768_GTTCATTGTGACCAAG-1  | GSM4626768 | Normal |
| GSM4626768_GTTCATTTTCGACAGCC-1 | GSM4626768 | Normal |
| GSM4626768_GTTCATTTCTCGATGA-1  | GSM4626768 | Normal |
| GSM4626768_GTTCGGGAGCCGTCGT-1  | GSM4626768 | Normal |
| GSM4626768_GTTCGGGAGTGTACCT-1  | GSM4626768 | Normal |
| GSM4626768_GTTCGGGAGTGTGAA-1   | GSM4626768 | Normal |
| GSM4626768_GTTCGGGCAGTCACTA-1  | GSM4626768 | Normal |
| GSM4626768_GTTCGGGGTACTTGAC-1  | GSM4626768 | Normal |
| GSM4626768_GTTCGGGGTTCGAGTTT-1 | GSM4626768 | Normal |
| GSM4626768_GTTCGGGGTCTCCATC-1  | GSM4626768 | Normal |
| GSM4626768_GTTCGGGGTTTGTGG-1   | GSM4626768 | Normal |
| GSM4626768_GTTCGGGTCGCCATAA-1  | GSM4626768 | Normal |
| GSM4626768_GTTCGGGTCTAACTGG-1  | GSM4626768 | Normal |
| GSM4626768_GTTCGGGTCTATCGCC-1  | GSM4626768 | Normal |
| GSM4626768_GTTCTCGAGCCCTAAT-1  | GSM4626768 | Normal |
| GSM4626768_GTTCTCGAGGTGCACA-1  | GSM4626768 | Normal |
| GSM4626768_GTTCTCGCAGCCTGTG-1  | GSM4626768 | Normal |
| GSM4626768_GTTCTCGCATATACGC-1  | GSM4626768 | Normal |
| GSM4626768_GTTCTCGGTCAGAGGT-1  | GSM4626768 | Normal |
| GSM4626768_GTTCTCGGTTGGGACA-1  | GSM4626768 | Normal |
| GSM4626768_GTTCTCGTCGTGGTTCG-1 | GSM4626768 | Normal |
| GSM4626768_GTTCTCGTCTGGGCCA-1  | GSM4626768 | Normal |
| GSM4626768_GTTTCTAAGATGTCGG-1  | GSM4626768 | Normal |
| GSM4626768_GTTTCTAAGCAAATCA-1  | GSM4626768 | Normal |
| GSM4626768_GTTTCTACACGTTGGC-1  | GSM4626768 | Normal |
| GSM4626768_GTTTCTACATCGATTG-1  | GSM4626768 | Normal |
| GSM4626768_GTTTCTACATTAACCG-1  | GSM4626768 | Normal |
| GSM4626768_GTTTCTACATTGCGGC-1  | GSM4626768 | Normal |
| GSM4626768_GTTTCTAGTAACCGCA-1  | GSM4626768 | Normal |
| GSM4626768_GTTTCTAGTTAGTGGG-1  | GSM4626768 | Normal |
| GSM4626768_GTTTCTATCGACCAGC-1  | GSM4626768 | Normal |
| GSM4626768_TAAACCGAGAAGGCCT-1  | GSM4626768 | Normal |
| GSM4626768_TAAACCGAGAAGGTGA-1  | GSM4626768 | Normal |
| GSM4626768_TAAACCGAGAGCTATA-1  | GSM4626768 | Normal |
| GSM4626768_TAAACCGAGCGAGAAA-1  | GSM4626768 | Normal |
| GSM4626768_TAAACCGAGGATTCGG-1  | GSM4626768 | Normal |
| GSM4626768_TAAACCGAGGTGACCA-1  | GSM4626768 | Normal |
| GSM4626768_TAAACCGCAGGTGCCT-1  | GSM4626768 | Normal |
| GSM4626768_TAAACCGCATAGTAAG-1  | GSM4626768 | Normal |
| GSM4626768_TAAACCGGTCAAGCGA-1  | GSM4626768 | Normal |
| GSM4626768_TAAACCGGTCCGAGTC-1  | GSM4626768 | Normal |
| GSM4626768_TAAACCGTCATCGATG-1  | GSM4626768 | Normal |
| GSM4626768_TAAACCGTCCTAAGTG-1  | GSM4626768 | Normal |
| GSM4626768_TAAGAGAAGAGGTACC-1  | GSM4626768 | Normal |
| GSM4626768_TAAGAGAAGATCTGCT-1  | GSM4626768 | Normal |
| GSM4626768_TAAGAGAAGCAACGGT-1  | GSM4626768 | Normal |
| GSM4626768_TAAGAGACACGACTCG-1  | GSM4626768 | Normal |
| GSM4626768_TAAGAGACAGGCCGATA-1 | GSM4626768 | Normal |
| GSM4626768_TAAGAGACATAAGACA-1  | GSM4626768 | Normal |
| GSM4626768_TAAGAGAGTCTCTCTG-1  | GSM4626768 | Normal |
| GSM4626768_TAAGAGAGTGAGGCTA-1  | GSM4626768 | Normal |
| GSM4626768_TAAGAGAGTGATAAAC-1  | GSM4626768 | Normal |
| GSM4626768_TAAGAGAGTTGCCTCT-1  | GSM4626768 | Normal |
| GSM4626768_TAAGAGATCCAAGTAC-1  | GSM4626768 | Normal |
| GSM4626768_TAAGAGATCTGACCTC-1  | GSM4626768 | Normal |
| GSM4626768_TAAGAGATCTTTACAC-1  | GSM4626768 | Normal |
| GSM4626768_TAAGCGTAGCCGGTAA-1  | GSM4626768 | Normal |

|                                |            |        |
|--------------------------------|------------|--------|
| GSM4626768_TAAGCGTCAGGGCATA-1  | GSM4626768 | Normal |
| GSM4626768_TAAGCGTGTAGCGATG-1  | GSM4626768 | Normal |
| GSM4626768_TAAGCGTGTCTTGATG-1  | GSM4626768 | Normal |
| GSM4626768_TAAGCGTTCATAACCG-1  | GSM4626768 | Normal |
| GSM4626768_TAAGCGTTCGCAAGC-1   | GSM4626768 | Normal |
| GSM4626768_TAAGCGTTCGAATGCT-1  | GSM4626768 | Normal |
| GSM4626768_TAAGCGTTCCTTACCTA-1 | GSM4626768 | Normal |
| GSM4626768_TAAGCGTTCCTTGCATT-1 | GSM4626768 | Normal |
| GSM4626768_TAAGTGCAGGACCACA-1  | GSM4626768 | Normal |
| GSM4626768_TAAGTGCAGTGAAGAG-1  | GSM4626768 | Normal |
| GSM4626768_TAAGTGCCAATGGACG-1  | GSM4626768 | Normal |
| GSM4626768_TAAGTGCCACAACGTT-1  | GSM4626768 | Normal |
| GSM4626768_TAAGTGCCTGTGGCTC-1  | GSM4626768 | Normal |
| GSM4626768_TAAGTGCTCCGCGTTT-1  | GSM4626768 | Normal |
| GSM4626768_TAAGTGCTCGCGGATC-1  | GSM4626768 | Normal |
| GSM4626768_TACACGAAGCAACGGT-1  | GSM4626768 | Normal |
| GSM4626768_TACACGAAGCCGGTAA-1  | GSM4626768 | Normal |
| GSM4626768_TACACGAAGGTGATAT-1  | GSM4626768 | Normal |
| GSM4626768_TACACGAAGTACGTAA-1  | GSM4626768 | Normal |
| GSM4626768_TACACGACACAGGAGT-1  | GSM4626768 | Normal |
| GSM4626768_TACACGACAGGGATTG-1  | GSM4626768 | Normal |
| GSM4626768_TACACGACATCGTCGG-1  | GSM4626768 | Normal |
| GSM4626768_TACACGACATGCTAGT-1  | GSM4626768 | Normal |
| GSM4626768_TACACGAGTACAAGTA-1  | GSM4626768 | Normal |
| GSM4626768_TACACGAGTAGTAGTA-1  | GSM4626768 | Normal |
| GSM4626768_TACACGAGTCCAGTGC-1  | GSM4626768 | Normal |
| GSM4626768_TACACGATCAAGGCTT-1  | GSM4626768 | Normal |
| GSM4626768_TACACGATCATTGCGA-1  | GSM4626768 | Normal |
| GSM4626768_TACAGTGAGCAATCTC-1  | GSM4626768 | Normal |
| GSM4626768_TACAGTGAGGGAAACA-1  | GSM4626768 | Normal |
| GSM4626768_TACAGTGCACTAGTAC-1  | GSM4626768 | Normal |
| GSM4626768_TACAGTGCAATCCAACA-1 | GSM4626768 | Normal |
| GSM4626768_TACAGTGCAATGCCACG-1 | GSM4626768 | Normal |
| GSM4626768_TACAGTGCAATAGGCT-1  | GSM4626768 | Normal |
| GSM4626768_TACAGTGGTAGCCTAT-1  | GSM4626768 | Normal |
| GSM4626768_TACAGTGTCACGATGT-1  | GSM4626768 | Normal |
| GSM4626768_TACAGTGTCATTCACT-1  | GSM4626768 | Normal |
| GSM4626768_TACAGTGTCCAAACAC-1  | GSM4626768 | Normal |
| GSM4626768_TACAGTGTCCTACTTAC-1 | GSM4626768 | Normal |
| GSM4626768_TACAGTGTCCTCCCTGA-1 | GSM4626768 | Normal |
| GSM4626768_TACCTATAGTCATGCT-1  | GSM4626768 | Normal |
| GSM4626768_TACCTATCAAGCTGAG-1  | GSM4626768 | Normal |
| GSM4626768_TACCTATCAGTCACTA-1  | GSM4626768 | Normal |
| GSM4626768_TACCTATGTAAATGAC-1  | GSM4626768 | Normal |
| GSM4626768_TACCTATGTAGCGTGA-1  | GSM4626768 | Normal |
| GSM4626768_TACCTATGTCAACAAGG-1 | GSM4626768 | Normal |
| GSM4626768_TACCTATGTGGCGAAT-1  | GSM4626768 | Normal |
| GSM4626768_TACCTATTCCACGCAG-1  | GSM4626768 | Normal |
| GSM4626768_TACCTATTCTATCCCG-1  | GSM4626768 | Normal |
| GSM4626768_TACCTTAAGCACCGCT-1  | GSM4626768 | Normal |
| GSM4626768_TACCTTAAGCGTAATA-1  | GSM4626768 | Normal |
| GSM4626768_TACCTTAAGTCTCAAC-1  | GSM4626768 | Normal |
| GSM4626768_TACCTTACAGGGATTG-1  | GSM4626768 | Normal |
| GSM4626768_TACCTTAGTAAGCACG-1  | GSM4626768 | Normal |
| GSM4626768_TACCTTAGTGTGAATA-1  | GSM4626768 | Normal |
| GSM4626768_TACCTTATCCAATGGT-1  | GSM4626768 | Normal |
| GSM4626768_TACGGATAGACAGACC-1  | GSM4626768 | Normal |

|                                |            |        |
|--------------------------------|------------|--------|
| GSM4626768_TACGGATAGGAATGGA-1  | GSM4626768 | Normal |
| GSM4626768_TACGGATAGTACATGA-1  | GSM4626768 | Normal |
| GSM4626768_TACGGATCAACGATGG-1  | GSM4626768 | Normal |
| GSM4626768_TACGGATCAGATCCAT-1  | GSM4626768 | Normal |
| GSM4626768_TACGGATCATTGACA-1   | GSM4626768 | Normal |
| GSM4626768_TACGGATGTAGCTGCC-1  | GSM4626768 | Normal |
| GSM4626768_TACGGATTCCAGAAATG-1 | GSM4626768 | Normal |
| GSM4626768_TACGGATTCCACGTTT-1  | GSM4626768 | Normal |
| GSM4626768_TACGGATTCCGGCTTGG-1 | GSM4626768 | Normal |
| GSM4626768_TACGGGCAGATATGGT-1  | GSM4626768 | Normal |
| GSM4626768_TACGGGCAGATGTAAC-1  | GSM4626768 | Normal |
| GSM4626768_TACGGGCAGGATCGCA-1  | GSM4626768 | Normal |
| GSM4626768_TACGGGCCAATCCAAC-1  | GSM4626768 | Normal |
| GSM4626768_TACGGGCCAGGCAGTA-1  | GSM4626768 | Normal |
| GSM4626768_TACGGGCGTGCTTCTC-1  | GSM4626768 | Normal |
| GSM4626768_TACGGGCTCAAGGTAA-1  | GSM4626768 | Normal |
| GSM4626768_TACGGGCTCAGTGCAT-1  | GSM4626768 | Normal |
| GSM4626768_TACGGGCTCATAGCAC-1  | GSM4626768 | Normal |
| GSM4626768_TACGGGCTCGCACTCT-1  | GSM4626768 | Normal |
| GSM4626768_TACGGGCTCTCGATGA-1  | GSM4626768 | Normal |
| GSM4626768_TACGGGCTCTGCTGTC-1  | GSM4626768 | Normal |
| GSM4626768_TACGGTACAATAGCGG-1  | GSM4626768 | Normal |
| GSM4626768_TACGGTACAATTGCTG-1  | GSM4626768 | Normal |
| GSM4626768_TACGGTACATCTATGG-1  | GSM4626768 | Normal |
| GSM4626768_TACGGTAGTAGCGTCC-1  | GSM4626768 | Normal |
| GSM4626768_TACGGTAGTATCTGCA-1  | GSM4626768 | Normal |
| GSM4626768_TACGGTAGTTATGTGC-1  | GSM4626768 | Normal |
| GSM4626768_TACGGTATCACTTATC-1  | GSM4626768 | Normal |
| GSM4626768_TACGGTATCCCAACGG-1  | GSM4626768 | Normal |
| GSM4626768_TACTCATAGAATTCCC-1  | GSM4626768 | Normal |
| GSM4626768_TACTCATAGATCTGCT-1  | GSM4626768 | Normal |
| GSM4626768_TACTCATAGCTAACAA-1  | GSM4626768 | Normal |
| GSM4626768_TACTCATAGGTAAACT-1  | GSM4626768 | Normal |
| GSM4626768_TACTCATAGTAAGTAC-1  | GSM4626768 | Normal |
| GSM4626768_TACTCATAGTATCGAA-1  | GSM4626768 | Normal |
| GSM4626768_TACTCATGTATTACCG-1  | GSM4626768 | Normal |
| GSM4626768_TACTCATGTCTAGCGC-1  | GSM4626768 | Normal |
| GSM4626768_TACTCATGTGGTGTAG-1  | GSM4626768 | Normal |
| GSM4626768_TACTCATGTTGCTCCT-1  | GSM4626768 | Normal |
| GSM4626768_TACTCGCAGACGCAAC-1  | GSM4626768 | Normal |
| GSM4626768_TACTCGCCAAAGTCAA-1  | GSM4626768 | Normal |
| GSM4626768_TACTCGCCACTACAGT-1  | GSM4626768 | Normal |
| GSM4626768_TACTCGCCAGCTCCGA-1  | GSM4626768 | Normal |
| GSM4626768_TACTCGCGTCTCTTAT-1  | GSM4626768 | Normal |
| GSM4626768_TACTCGCTCCGCGGTA-1  | GSM4626768 | Normal |
| GSM4626768_TACTCGCTCTCAACTT-1  | GSM4626768 | Normal |
| GSM4626768_TACTTACAGCTTTGGT-1  | GSM4626768 | Normal |
| GSM4626768_TACTTACCACCCATTC-1  | GSM4626768 | Normal |
| GSM4626768_TACTTACCACCTCGGA-1  | GSM4626768 | Normal |
| GSM4626768_TACTTACGTAAGTCCG-1  | GSM4626768 | Normal |
| GSM4626768_TACTTACGTCATCCT-1   | GSM4626768 | Normal |
| GSM4626768_TACTTACTCCACTGGG-1  | GSM4626768 | Normal |
| GSM4626768_TACTTACTCTAGCACA-1  | GSM4626768 | Normal |
| GSM4626768_TACTTGTAAGAACGAG-1  | GSM4626768 | Normal |
| GSM4626768_TACTTGTAAGGGATA-1   | GSM4626768 | Normal |
| GSM4626768_TACTTGTAAGATGTAAC-1 | GSM4626768 | Normal |
| GSM4626768_TACTTGTAAGCGCTTC-1  | GSM4626768 | Normal |

|                                |            |        |
|--------------------------------|------------|--------|
| GSM4626768_TACTTGTCAAAGCAAT-1  | GSM4626768 | Normal |
| GSM4626768_TACTTGTGTCTAAAGA-1  | GSM4626768 | Normal |
| GSM4626768_TACTTGTTCCTCTAGC-1  | GSM4626768 | Normal |
| GSM4626768_TAGACCAAGATATACG-1  | GSM4626768 | Normal |
| GSM4626768_TAGACCACAAAGAATC-1  | GSM4626768 | Normal |
| GSM4626768_TAGACCAGTGGCGAAT-1  | GSM4626768 | Normal |
| GSM4626768_TAGACCAGTGGCTCCA-1  | GSM4626768 | Normal |
| GSM4626768_TAGACCATCAACACAC-1  | GSM4626768 | Normal |
| GSM4626768_TAGAGCTAGGAATGGA-1  | GSM4626768 | Normal |
| GSM4626768_TAGAGCTAGGAATTAC-1  | GSM4626768 | Normal |
| GSM4626768_TAGAGCTAGGTGTAA-1   | GSM4626768 | Normal |
| GSM4626768_TAGAGCTAGTACGACG-1  | GSM4626768 | Normal |
| GSM4626768_TAGAGCTCAGGTCCAC-1  | GSM4626768 | Normal |
| GSM4626768_TAGAGCTCATTTCCAGG-1 | GSM4626768 | Normal |
| GSM4626768_TAGAGCTGTGAGCGAT-1  | GSM4626768 | Normal |
| GSM4626768_TAGAGCTTCCGCAGTG-1  | GSM4626768 | Normal |
| GSM4626768_TAGAGCTTCTCTAGC-1   | GSM4626768 | Normal |
| GSM4626768_TAGCCGGAGGGTCTCC-1  | GSM4626768 | Normal |
| GSM4626768_TAGCCGGAGGTGATTA-1  | GSM4626768 | Normal |
| GSM4626768_TAGCCGGAGTAACCCT-1  | GSM4626768 | Normal |
| GSM4626768_TAGCCGGAGTCGATAA-1  | GSM4626768 | Normal |
| GSM4626768_TAGCCGGCAGGACGTA-1  | GSM4626768 | Normal |
| GSM4626768_TAGCCGGCAGGTCTCG-1  | GSM4626768 | Normal |
| GSM4626768_TAGCCGGCAGGTGGAT-1  | GSM4626768 | Normal |
| GSM4626768_TAGCCGGGTCATGCCG-1  | GSM4626768 | Normal |
| GSM4626768_TAGCCGGGTTCTGTTGA-1 | GSM4626768 | Normal |
| GSM4626768_TAGCCGGTCTATCGCC-1  | GSM4626768 | Normal |
| GSM4626768_TAGGCATAGCGTGAAC-1  | GSM4626768 | Normal |
| GSM4626768_TAGGCATCACACCGAC-1  | GSM4626768 | Normal |
| GSM4626768_TAGGCATCAGGTCCAC-1  | GSM4626768 | Normal |
| GSM4626768_TAGGCATGTCTTGTCC-1  | GSM4626768 | Normal |
| GSM4626768_TAGGCATTGAGCCCA-1   | GSM4626768 | Normal |
| GSM4626768_TAGGCATTGTTGCCT-1   | GSM4626768 | Normal |
| GSM4626768_TAGTGGTAGGAGCGAG-1  | GSM4626768 | Normal |
| GSM4626768_TAGTGGTACATTAGC-1   | GSM4626768 | Normal |
| GSM4626768_TAGTGGTCAGACAAAT-1  | GSM4626768 | Normal |
| GSM4626768_TAGTGGTCAGGGTATG-1  | GSM4626768 | Normal |
| GSM4626768_TAGTGGTCATGTTCCC-1  | GSM4626768 | Normal |
| GSM4626768_TAGTGGTGTAACACA-1   | GSM4626768 | Normal |
| GSM4626768_TAGTGGTGTAATGTG-1   | GSM4626768 | Normal |
| GSM4626768_TAGTGGTGTAATTGGA-1  | GSM4626768 | Normal |
| GSM4626768_TAGTGGTGTTCAATC-1   | GSM4626768 | Normal |
| GSM4626768_TAGTGGTCAAGGCTT-1   | GSM4626768 | Normal |
| GSM4626768_TAGTTGGAGCCAGAAC-1  | GSM4626768 | Normal |
| GSM4626768_TAGTTGGAGGCATGGT-1  | GSM4626768 | Normal |
| GSM4626768_TAGTTGGAGTTTGCCT-1  | GSM4626768 | Normal |
| GSM4626768_TAGTTGGCAATCGGTT-1  | GSM4626768 | Normal |
| GSM4626768_TAGTTGGCACATCCAA-1  | GSM4626768 | Normal |
| GSM4626768_TAGTTGGCAGCATGAG-1  | GSM4626768 | Normal |
| GSM4626768_TAGTTGGCAGGCTCAC-1  | GSM4626768 | Normal |
| GSM4626768_TAGTTGGGTCTCGTTC-1  | GSM4626768 | Normal |
| GSM4626768_TAGTTGGGTCTTCTCG-1  | GSM4626768 | Normal |
| GSM4626768_TAGTTGGTCCACTCCA-1  | GSM4626768 | Normal |
| GSM4626768_TAGTTGGTCTCACATT-1  | GSM4626768 | Normal |
| GSM4626768_TAGTTGGTCTCCAGGG-1  | GSM4626768 | Normal |
| GSM4626768_TATCAGGAGCATCATC-1  | GSM4626768 | Normal |
| GSM4626768_TATCAGGAGGCCCTTG-1  | GSM4626768 | Normal |

|                               |            |        |
|-------------------------------|------------|--------|
| GSM4626768_TATCAGGAGTTACGGG-1 | GSM4626768 | Normal |
| GSM4626768_TATCAGGCAGACGTAG-1 | GSM4626768 | Normal |
| GSM4626768_TATCAGGCATCACCT-1  | GSM4626768 | Normal |
| GSM4626768_TATCAGGCATGATCCA-1 | GSM4626768 | Normal |
| GSM4626768_TATCAGGCATGGTCAT-1 | GSM4626768 | Normal |
| GSM4626768_TATCAGGGTCAAAGAT-1 | GSM4626768 | Normal |
| GSM4626768_TATCAGGGTGTTCTTT-1 | GSM4626768 | Normal |
| GSM4626768_TATCAGGGTTCACGG-1  | GSM4626768 | Normal |
| GSM4626768_TATCTCAAGAGGTACC-1 | GSM4626768 | Normal |
| GSM4626768_TATCTCAAGATCCCAT-1 | GSM4626768 | Normal |
| GSM4626768_TATCTCAAGATGCCTT-1 | GSM4626768 | Normal |
| GSM4626768_TATCTCAAGCCTTGAT-1 | GSM4626768 | Normal |
| GSM4626768_TATCTCAAGTGCGTGA-1 | GSM4626768 | Normal |
| GSM4626768_TATCTCACAAGTAGTA-1 | GSM4626768 | Normal |
| GSM4626768_TATCTCAGTCTTTCAT-1 | GSM4626768 | Normal |
| GSM4626768_TATCTCAGTGCCGTG-1  | GSM4626768 | Normal |
| GSM4626768_TATCTCAGTGGTACAG-1 | GSM4626768 | Normal |
| GSM4626768_TATCTCAGTTCGAATC-1 | GSM4626768 | Normal |
| GSM4626768_TATCTCAGTTGATTG-1  | GSM4626768 | Normal |
| GSM4626768_TATCTCATCACTATTC-1 | GSM4626768 | Normal |
| GSM4626768_TATCTCATCGTTTGCC-1 | GSM4626768 | Normal |
| GSM4626768_TATCTCATCTAACTTC-1 | GSM4626768 | Normal |
| GSM4626768_TATGCCCAGATGCCTT-1 | GSM4626768 | Normal |
| GSM4626768_TATGCCCCAATGTAAG-1 | GSM4626768 | Normal |
| GSM4626768_TATGCCCCACACCGAC-1 | GSM4626768 | Normal |
| GSM4626768_TATGCCCCAGGTGGAT-1 | GSM4626768 | Normal |
| GSM4626768_TATGCCCCAGTCGTGC-1 | GSM4626768 | Normal |
| GSM4626768_TATGCCCGTAAATGAC-1 | GSM4626768 | Normal |
| GSM4626768_TATGCCCTCAAACCGT-1 | GSM4626768 | Normal |
| GSM4626768_TATGCCCTCAATAAGG-1 | GSM4626768 | Normal |
| GSM4626768_TATGCCCTCACAAACC-1 | GSM4626768 | Normal |
| GSM4626768_TATGCCCTCAGCTGGC-1 | GSM4626768 | Normal |
| GSM4626768_TATGCCCTCCTCGCAT-1 | GSM4626768 | Normal |
| GSM4626768_TATGCCCTCGCCGTGA-1 | GSM4626768 | Normal |
| GSM4626768_TATTACCAGGAATTAC-1 | GSM4626768 | Normal |
| GSM4626768_TATTACCAGGTTACCT-1 | GSM4626768 | Normal |
| GSM4626768_TATTACCCAACGCACC-1 | GSM4626768 | Normal |
| GSM4626768_TATTACCGTGACCAAG-1 | GSM4626768 | Normal |
| GSM4626768_TATTACCGTGGGTCAA-1 | GSM4626768 | Normal |
| GSM4626768_TATTACCTCCATGCTC-1 | GSM4626768 | Normal |
| GSM4626768_TCAACGAAGATGTTAG-1 | GSM4626768 | Normal |
| GSM4626768_TCAACGAAGCGTAGTG-1 | GSM4626768 | Normal |
| GSM4626768_TCAACGAAGCTACCGC-1 | GSM4626768 | Normal |
| GSM4626768_TCAACGAAGCTCTCGG-1 | GSM4626768 | Normal |
| GSM4626768_TCAACGACAAGAGTCG-1 | GSM4626768 | Normal |
| GSM4626768_TCAACGAGTGCATCTA-1 | GSM4626768 | Normal |
| GSM4626768_TCAACGATCACTATTC-1 | GSM4626768 | Normal |
| GSM4626768_TCAACGATCTGAGTGT-1 | GSM4626768 | Normal |
| GSM4626768_TCAATCTAGCGTAGTG-1 | GSM4626768 | Normal |
| GSM4626768_TCAATCTAGTAGCCGA-1 | GSM4626768 | Normal |
| GSM4626768_TCAATCTACCCATTC-1  | GSM4626768 | Normal |
| GSM4626768_TCAATCTCATAGTAAG-1 | GSM4626768 | Normal |
| GSM4626768_TCACAAGAGAAGCCCA-1 | GSM4626768 | Normal |
| GSM4626768_TCACAAGAGATGGCGT-1 | GSM4626768 | Normal |
| GSM4626768_TCACAAGAGTCATCCA-1 | GSM4626768 | Normal |
| GSM4626768_TCACAAGAGTGACTCT-1 | GSM4626768 | Normal |
| GSM4626768_TCACAAGCAAAGCAAT-1 | GSM4626768 | Normal |

|                                |            |        |
|--------------------------------|------------|--------|
| GSM4626768_TCACAAGCATGTCCTC-1  | GSM4626768 | Normal |
| GSM4626768_TCACAAGGTCCAGTGC-1  | GSM4626768 | Normal |
| GSM4626768_TCACAAGGTGGCCCTA-1  | GSM4626768 | Normal |
| GSM4626768_TCACGAAAGACCACGA-1  | GSM4626768 | Normal |
| GSM4626768_TCACGAAAGGCATGGT-1  | GSM4626768 | Normal |
| GSM4626768_TCACGAAAGGCCATAG-1  | GSM4626768 | Normal |
| GSM4626768_TCACGAAAGTGATCGG-1  | GSM4626768 | Normal |
| GSM4626768_TCACGAAAGTTGAGTA-1  | GSM4626768 | Normal |
| GSM4626768_TCACGAACACGGCGTT-1  | GSM4626768 | Normal |
| GSM4626768_TCACGAACAGCCTGTG-1  | GSM4626768 | Normal |
| GSM4626768_TCACGAACATAGTAAG-1  | GSM4626768 | Normal |
| GSM4626768_TCACGAAGTAATCACC-1  | GSM4626768 | Normal |
| GSM4626768_TCACGAAGTAGAAGGA-1  | GSM4626768 | Normal |
| GSM4626768_TCACGAAGTGCCTGGT-1  | GSM4626768 | Normal |
| GSM4626768_TCACGAAGTGCCTGTG-1  | GSM4626768 | Normal |
| GSM4626768_TCACGAAGTGGTGTAG-1  | GSM4626768 | Normal |
| GSM4626768_TCACGAATCGGAGCAA-1  | GSM4626768 | Normal |
| GSM4626768_TCAGATGAGCAGACTG-1  | GSM4626768 | Normal |
| GSM4626768_TCAGATGGTAAACCTC-1  | GSM4626768 | Normal |
| GSM4626768_TCAGATGGTCTAGTGT-1  | GSM4626768 | Normal |
| GSM4626768_TCAGATGGTGAGGGTT-1  | GSM4626768 | Normal |
| GSM4626768_TCAGATGTCCTCAATT-1  | GSM4626768 | Normal |
| GSM4626768_TCAGATGTCTGTCTCG-1  | GSM4626768 | Normal |
| GSM4626768_TCAGCAAAGATATACG-1  | GSM4626768 | Normal |
| GSM4626768_TCAGCAAAGCAATATG-1  | GSM4626768 | Normal |
| GSM4626768_TCAGCAAAGTCTCAACA-1 | GSM4626768 | Normal |
| GSM4626768_TCAGCAAAGTGAAGGCT-1 | GSM4626768 | Normal |
| GSM4626768_TCAGCAAAGTGATAAGT-1 | GSM4626768 | Normal |
| GSM4626768_TCAGCAATCATCTGCC-1  | GSM4626768 | Normal |
| GSM4626768_TCAGCAATCCATGCTC-1  | GSM4626768 | Normal |
| GSM4626768_TCAGCAATCTTGTCAT-1  | GSM4626768 | Normal |
| GSM4626768_TCAGCTCAGATCCCAT-1  | GSM4626768 | Normal |
| GSM4626768_TCAGCTCAGGTGTGGT-1  | GSM4626768 | Normal |
| GSM4626768_TCAGCTCAGTATTGGA-1  | GSM4626768 | Normal |
| GSM4626768_TCAGCTCGTGATGGG-1   | GSM4626768 | Normal |
| GSM4626768_TCAGCTCTCCGTCAA-1   | GSM4626768 | Normal |
| GSM4626768_TCAGGATAGACCTTTG-1  | GSM4626768 | Normal |
| GSM4626768_TCAGGATAGAGTACCG-1  | GSM4626768 | Normal |
| GSM4626768_TCAGGATAGATGTGGC-1  | GSM4626768 | Normal |
| GSM4626768_TCAGGATAGGCGTACA-1  | GSM4626768 | Normal |
| GSM4626768_TCAGGATCACATTAGC-1  | GSM4626768 | Normal |
| GSM4626768_TCAGGATCACGTAAGG-1  | GSM4626768 | Normal |
| GSM4626768_TCAGGATCATGAAGTA-1  | GSM4626768 | Normal |
| GSM4626768_TCAGGATGTATGGTTC-1  | GSM4626768 | Normal |
| GSM4626768_TCAGGATGTCCATCCT-1  | GSM4626768 | Normal |
| GSM4626768_TCAGGATGTTCGATTGT-1 | GSM4626768 | Normal |
| GSM4626768_TCAGGATGTTCGATCC-1  | GSM4626768 | Normal |
| GSM4626768_TCAGGATGTTATCGGT-1  | GSM4626768 | Normal |
| GSM4626768_TCAGGATTCAAAGACA-1  | GSM4626768 | Normal |
| GSM4626768_TCAGGATTCATCTGCC-1  | GSM4626768 | Normal |
| GSM4626768_TCAGGTAAGCTAGTGG-1  | GSM4626768 | Normal |
| GSM4626768_TCAGGTAGTTGTGGAG-1  | GSM4626768 | Normal |
| GSM4626768_TCAGGTATCAGCGACC-1  | GSM4626768 | Normal |
| GSM4626768_TCAGGTATCGTCTGCT-1  | GSM4626768 | Normal |
| GSM4626768_TCAGGTATCTGTCAAG-1  | GSM4626768 | Normal |
| GSM4626768_TCATTACAGAGCCTAG-1  | GSM4626768 | Normal |
| GSM4626768_TCATTACAGATGTGGC-1  | GSM4626768 | Normal |

|                                |            |        |
|--------------------------------|------------|--------|
| GSM4626768_TCATTACAGCCGCCTA-1  | GSM4626768 | Normal |
| GSM4626768_TCATTACAGCGATAGC-1  | GSM4626768 | Normal |
| GSM4626768_TCATTACAGGTAGCTG-1  | GSM4626768 | Normal |
| GSM4626768_TCATTACCAATTGCTG-1  | GSM4626768 | Normal |
| GSM4626768_TCATTACCACTGTTAG-1  | GSM4626768 | Normal |
| GSM4626768_TCATTACGTACGACCC-1  | GSM4626768 | Normal |
| GSM4626768_TCATTACGTACCCAG-1   | GSM4626768 | Normal |
| GSM4626768_TCATTACGTCACTAG-1   | GSM4626768 | Normal |
| GSM4626768_TCATTACTCGCCTGAG-1  | GSM4626768 | Normal |
| GSM4626768_TCATTACTCGTGGGAA-1  | GSM4626768 | Normal |
| GSM4626768_TCATTACTCTGCTGCT-1  | GSM4626768 | Normal |
| GSM4626768_TCATTTGAGCTGAACG-1  | GSM4626768 | Normal |
| GSM4626768_TCATTTGAGGCTAGAC-1  | GSM4626768 | Normal |
| GSM4626768_TCATTTGAGTACCGGA-1  | GSM4626768 | Normal |
| GSM4626768_TCATTTGCACATGTGT-1  | GSM4626768 | Normal |
| GSM4626768_TCATTTGCACGGACAA-1  | GSM4626768 | Normal |
| GSM4626768_TCATTTGGTAATCGTC-1  | GSM4626768 | Normal |
| GSM4626768_TCATTTGGTAGAAGGA-1  | GSM4626768 | Normal |
| GSM4626768_TCATTTGGTCCAGTGC-1  | GSM4626768 | Normal |
| GSM4626768_TCATTTGGTCTCTTTA-1  | GSM4626768 | Normal |
| GSM4626768_TCATTTGGTCTTCGTC-1  | GSM4626768 | Normal |
| GSM4626768_TCATTTGTCACCACCT-1  | GSM4626768 | Normal |
| GSM4626768_TCCACACAGTATCGAA-1  | GSM4626768 | Normal |
| GSM4626768_TCCACACAGTTAAGTG-1  | GSM4626768 | Normal |
| GSM4626768_TCCACACGTACCCAG-1   | GSM4626768 | Normal |
| GSM4626768_TCCACACGTGGTACAG-1  | GSM4626768 | Normal |
| GSM4626768_TCCACACTCCAATGGT-1  | GSM4626768 | Normal |
| GSM4626768_TCCACACTCCACTGGG-1  | GSM4626768 | Normal |
| GSM4626768_TCCACACTCCCTCTTT-1  | GSM4626768 | Normal |
| GSM4626768_TCCACACTCTACGAGT-1  | GSM4626768 | Normal |
| GSM4626768_TCCCGATAGCTTCGCG-1  | GSM4626768 | Normal |
| GSM4626768_TCCCGATCAATCTGCA-1  | GSM4626768 | Normal |
| GSM4626768_TCCCGATCAGACGTAG-1  | GSM4626768 | Normal |
| GSM4626768_TCCCGATCATAAAGGT-1  | GSM4626768 | Normal |
| GSM4626768_TCCCGATGTCCGAAGA-1  | GSM4626768 | Normal |
| GSM4626768_TCCCGATGTGTCGCTG-1  | GSM4626768 | Normal |
| GSM4626768_TCCCGATTCAACGCTA-1  | GSM4626768 | Normal |
| GSM4626768_TCCCGATTCTGTTGTCG-1 | GSM4626768 | Normal |
| GSM4626768_TCCCGATTCTACCAGA-1  | GSM4626768 | Normal |
| GSM4626768_TCCCGATTCTTCGAGA-1  | GSM4626768 | Normal |
| GSM4626768_TCGAGGCAGCACCGTC-1  | GSM4626768 | Normal |
| GSM4626768_TCGAGGCCAAATACAG-1  | GSM4626768 | Normal |
| GSM4626768_TCGAGGCCAATGACCT-1  | GSM4626768 | Normal |
| GSM4626768_TCGAGGCCACCACGTG-1  | GSM4626768 | Normal |
| GSM4626768_TCGAGGCCAGATCCAT-1  | GSM4626768 | Normal |
| GSM4626768_TCGAGGCTCAGATAAG-1  | GSM4626768 | Normal |
| GSM4626768_TCGCGAGAGGTCGGAT-1  | GSM4626768 | Normal |
| GSM4626768_TCGCGAGAGTATCTCG-1  | GSM4626768 | Normal |
| GSM4626768_TCGCGAGCAACGCACC-1  | GSM4626768 | Normal |
| GSM4626768_TCGCGAGCACAGGCCT-1  | GSM4626768 | Normal |
| GSM4626768_TCGCGAGCACGGTTTA-1  | GSM4626768 | Normal |
| GSM4626768_TCGCGAGTCAGCACAT-1  | GSM4626768 | Normal |
| GSM4626768_TCGCGAGTCTTCGAGA-1  | GSM4626768 | Normal |
| GSM4626768_TCGCGTTAGCTAAGAT-1  | GSM4626768 | Normal |
| GSM4626768_TCGCGTTAGTGGGCTA-1  | GSM4626768 | Normal |
| GSM4626768_TCGCGTTCACAAGTAA-1  | GSM4626768 | Normal |
| GSM4626768_TCGCGTTCACGACTCG-1  | GSM4626768 | Normal |



|                               |            |        |
|-------------------------------|------------|--------|
| GSM4626768_TCGCGTTCATATACGC-1 | GSM4626768 | Normal |
| GSM4626768_TCGCGTTCATTGACA-1  | GSM4626768 | Normal |
| GSM4626768_TCGCGTTGTAAATGTG-1 | GSM4626768 | Normal |
| GSM4626768_TCGCGTTGTAGGAGTC-1 | GSM4626768 | Normal |
| GSM4626768_TCGCGTTGTGAGGGAG-1 | GSM4626768 | Normal |
| GSM4626768_TCGCGTTTCCGCAGTG-1 | GSM4626768 | Normal |
| GSM4626768_TCGCGTTTCTCTGCTG-1 | GSM4626768 | Normal |
| GSM4626768_TCGCGTTTCTTACCTA-1 | GSM4626768 | Normal |
| GSM4626768_TCGGGACAGATCGATA-1 | GSM4626768 | Normal |
| GSM4626768_TCGGGACAGGCCCTTG-1 | GSM4626768 | Normal |
| GSM4626768_TCGGGACAGGCGTACA-1 | GSM4626768 | Normal |
| GSM4626768_TCGGGACAGTACATGA-1 | GSM4626768 | Normal |
| GSM4626768_TCGGGACAGTACGCC-1  | GSM4626768 | Normal |
| GSM4626768_TCGGGACCAACACCTA-1 | GSM4626768 | Normal |
| GSM4626768_TCGGGACCAATGGAAT-1 | GSM4626768 | Normal |
| GSM4626768_TCGGGACGTTCTGCTC-1 | GSM4626768 | Normal |
| GSM4626768_TCGGGACTCGGCGCAT-1 | GSM4626768 | Normal |
| GSM4626768_TCGGGACTCGTCTGAA-1 | GSM4626768 | Normal |
| GSM4626768_TCGGGACTCTTAGCCC-1 | GSM4626768 | Normal |
| GSM4626768_TCGGTAACAAGGGTCA-1 | GSM4626768 | Normal |
| GSM4626768_TCGGTAACATCGACGC-1 | GSM4626768 | Normal |
| GSM4626768_TCGGTAACATCTATGG-1 | GSM4626768 | Normal |
| GSM4626768_TCGGTAACATGTAAGA-1 | GSM4626768 | Normal |
| GSM4626768_TCGGTAAGTCTCAACA-1 | GSM4626768 | Normal |
| GSM4626768_TCGGTAAGTTGGAGGT-1 | GSM4626768 | Normal |
| GSM4626768_TCGGTAATCGAGAGCA-1 | GSM4626768 | Normal |
| GSM4626768_TCGGTAATCGGCGGTT-1 | GSM4626768 | Normal |
| GSM4626768_TCGGTAATCGGTTAAC-1 | GSM4626768 | Normal |
| GSM4626768_TCGTACCAGTTTAGGA-1 | GSM4626768 | Normal |
| GSM4626768_TCGTACCCATGGTTGT-1 | GSM4626768 | Normal |
| GSM4626768_TCGTACCCATTAGGCT-1 | GSM4626768 | Normal |
| GSM4626768_TCGTACCGTCAACTGT-1 | GSM4626768 | Normal |
| GSM4626768_TCGTACCGTTCGTTGA-1 | GSM4626768 | Normal |
| GSM4626768_TCGTACCTCGGCTTGG-1 | GSM4626768 | Normal |
| GSM4626768_TCGTACCTCGTTACAG-1 | GSM4626768 | Normal |
| GSM4626768_TCGTAGAAGCCCTAAT-1 | GSM4626768 | Normal |
| GSM4626768_TCGTAGAAGGTTACCT-1 | GSM4626768 | Normal |
| GSM4626768_TCGTAGACAGGAATGC-1 | GSM4626768 | Normal |
| GSM4626768_TCGTAGAGTCTAGAGG-1 | GSM4626768 | Normal |
| GSM4626768_TCGTAGAGTGCACCAC-1 | GSM4626768 | Normal |
| GSM4626768_TCGTAGATCAGATAAG-1 | GSM4626768 | Normal |
| GSM4626768_TCGTAGATCGACGAA-1  | GSM4626768 | Normal |
| GSM4626768_TCTATTGAGTCGCCGT-1 | GSM4626768 | Normal |
| GSM4626768_TCTATTGCAAGCCGTC-1 | GSM4626768 | Normal |
| GSM4626768_TCTATTGCAATTCCTT-1 | GSM4626768 | Normal |
| GSM4626768_TCTATTGCATACTCTT-1 | GSM4626768 | Normal |
| GSM4626768_TCTATTGGTGATGCC-1  | GSM4626768 | Normal |
| GSM4626768_TCTATTGTCCTCAATT-1 | GSM4626768 | Normal |
| GSM4626768_TCTCATAAGATTACCC-1 | GSM4626768 | Normal |
| GSM4626768_TCTCATAAGCTCTCGG-1 | GSM4626768 | Normal |
| GSM4626768_TCTCATAAGTCAAGCC-1 | GSM4626768 | Normal |
| GSM4626768_TCTCATAACTGTCCGG-1 | GSM4626768 | Normal |
| GSM4626768_TCTCATAAGTCAACTA-1 | GSM4626768 | Normal |
| GSM4626768_TCTCATAGTCTGCGGT-1 | GSM4626768 | Normal |
| GSM4626768_TCTCATAGTGCAGTAA-1 | GSM4626768 | Normal |
| GSM4626768_TCTCATATCGTAGGTT-1 | GSM4626768 | Normal |
| GSM4626768_TCTCATATCTCTAGGA-1 | GSM4626768 | Normal |

|                                |            |        |
|--------------------------------|------------|--------|
| GSM4626768_TCTCATATCTCTGCTG-1  | GSM4626768 | Normal |
| GSM4626768_TCTCATATCTTGTCAT-1  | GSM4626768 | Normal |
| GSM4626768_TCTCTAACACTTCTGC-1  | GSM4626768 | Normal |
| GSM4626768_TCTCTAACATTCTCAT-1  | GSM4626768 | Normal |
| GSM4626768_TCTCTAAGTCAGAAGC-1  | GSM4626768 | Normal |
| GSM4626768_TCTGAGACATGTTCCC-1  | GSM4626768 | Normal |
| GSM4626768_TCTGAGAGTAAATGAC-1  | GSM4626768 | Normal |
| GSM4626768_TCTGAGAGTGACCAAG-1  | GSM4626768 | Normal |
| GSM4626768_TCTGAGAGTTGGTTTG-1  | GSM4626768 | Normal |
| GSM4626768_TCTGAGATCCGCAAGC-1  | GSM4626768 | Normal |
| GSM4626768_TCTGGAAAGAAGGCCT-1  | GSM4626768 | Normal |
| GSM4626768_TCTGGAAAGACTAGGC-1  | GSM4626768 | Normal |
| GSM4626768_TCTGGAAAGCGACGTA-1  | GSM4626768 | Normal |
| GSM4626768_TCTGGAAAGCTGCGAA-1  | GSM4626768 | Normal |
| GSM4626768_TCTGGAACAATAACGA-1  | GSM4626768 | Normal |
| GSM4626768_TCTGGAAGTACGAAAT-1  | GSM4626768 | Normal |
| GSM4626768_TCTGGAAGTGCTTCTC-1  | GSM4626768 | Normal |
| GSM4626768_TCTGGAATCGGAAATA-1  | GSM4626768 | Normal |
| GSM4626768_TCTTCGGAGCCCAATT-1  | GSM4626768 | Normal |
| GSM4626768_TCTTCGGAGCCCTAAT-1  | GSM4626768 | Normal |
| GSM4626768_TCTTCGGAGCTCTCGG-1  | GSM4626768 | Normal |
| GSM4626768_TCTTCGGAGGGATCTG-1  | GSM4626768 | Normal |
| GSM4626768_TCTTCGGCACACTGCG-1  | GSM4626768 | Normal |
| GSM4626768_TCTTCGGCACGAGAGT-1  | GSM4626768 | Normal |
| GSM4626768_TCTTCGGCAGTAAGCG-1  | GSM4626768 | Normal |
| GSM4626768_TCTTCGGGTACAGACG-1  | GSM4626768 | Normal |
| GSM4626768_TCTTTCCAGTCATCCA-1  | GSM4626768 | Normal |
| GSM4626768_TCTTTCCCATCTGGTA-1  | GSM4626768 | Normal |
| GSM4626768_TCTTTCCGTGTGAATA-1  | GSM4626768 | Normal |
| GSM4626768_TGAAAGAAGCGATGAC-1  | GSM4626768 | Normal |
| GSM4626768_TGAAAGAAGTTTGCGT-1  | GSM4626768 | Normal |
| GSM4626768_TGAAAGACATGAGCGA-1  | GSM4626768 | Normal |
| GSM4626768_TGAAAGATCCAAACAC-1  | GSM4626768 | Normal |
| GSM4626768_TGACAACAGGGTATCG-1  | GSM4626768 | Normal |
| GSM4626768_TGACAACCACTTAACG-1  | GSM4626768 | Normal |
| GSM4626768_TGACAACAGTCAGAG-1   | GSM4626768 | Normal |
| GSM4626768_TGACAACGTCGAGATG-1  | GSM4626768 | Normal |
| GSM4626768_TGACAACCTCGGCATCG-1 | GSM4626768 | Normal |
| GSM4626768_TGACAACCTCTGAAAGA-1 | GSM4626768 | Normal |
| GSM4626768_TGACGGCAGGACCACA-1  | GSM4626768 | Normal |
| GSM4626768_TGACGGCCAGACGTAG-1  | GSM4626768 | Normal |
| GSM4626768_TGACGGCCATAGTAAG-1  | GSM4626768 | Normal |
| GSM4626768_TGACGGCGTACATCCA-1  | GSM4626768 | Normal |
| GSM4626768_TGACGGCGTATAATGG-1  | GSM4626768 | Normal |
| GSM4626768_TGACGGCGTTAAGATG-1  | GSM4626768 | Normal |
| GSM4626768_TGACGGCGTTAAGGGC-1  | GSM4626768 | Normal |
| GSM4626768_TGACGGCTCATTATCC-1  | GSM4626768 | Normal |
| GSM4626768_TGACTAGAGCAGCCTC-1  | GSM4626768 | Normal |
| GSM4626768_TGACTAGCACCGATAT-1  | GSM4626768 | Normal |
| GSM4626768_TGACTAGCATGGTCAT-1  | GSM4626768 | Normal |
| GSM4626768_TGACTAGGTCATGCAT-1  | GSM4626768 | Normal |
| GSM4626768_TGACTAGGTCGCTTTC-1  | GSM4626768 | Normal |
| GSM4626768_TGACTAGGTCGTCTTC-1  | GSM4626768 | Normal |
| GSM4626768_TGACTAGGTGAAGGCT-1  | GSM4626768 | Normal |
| GSM4626768_TGACTAGGTGCTGTAT-1  | GSM4626768 | Normal |
| GSM4626768_TGACTAGGTGTGCCTG-1  | GSM4626768 | Normal |
| GSM4626768_TGACTAGGTTCGAATC-1  | GSM4626768 | Normal |

|                                |            |        |
|--------------------------------|------------|--------|
| GSM4626768_TGACTAGGTTTGGCGC-1  | GSM4626768 | Normal |
| GSM4626768_TGACTAGGTTTGTGG-1   | GSM4626768 | Normal |
| GSM4626768_TGACTAGTCAAGGTA-1   | GSM4626768 | Normal |
| GSM4626768_TGACTAGTCGGATGTT-1  | GSM4626768 | Normal |
| GSM4626768_TGACTAGTCTGCTGTC-1  | GSM4626768 | Normal |
| GSM4626768_TGACTTTAGAACTCGG-1  | GSM4626768 | Normal |
| GSM4626768_TGACTTTAGGAATTAC-1  | GSM4626768 | Normal |
| GSM4626768_TGACTTTAGGATGGAA-1  | GSM4626768 | Normal |
| GSM4626768_TGACTTTCAATGCCAT-1  | GSM4626768 | Normal |
| GSM4626768_TGACTTTACGAAGCA-1   | GSM4626768 | Normal |
| GSM4626768_TGACTTTCACTTCGAA-1  | GSM4626768 | Normal |
| GSM4626768_TGACTTTGTACAGACG-1  | GSM4626768 | Normal |
| GSM4626768_TGACTTTGTGCGCATCG-1 | GSM4626768 | Normal |
| GSM4626768_TGACTTTGTGAGGCTA-1  | GSM4626768 | Normal |
| GSM4626768_TGACTTTGTGTGCGTC-1  | GSM4626768 | Normal |
| GSM4626768_TGACTTTTCAAACGGG-1  | GSM4626768 | Normal |
| GSM4626768_TGACTTTTACAATGC-1   | GSM4626768 | Normal |
| GSM4626768_TGACTTTTACCCTGTA-1  | GSM4626768 | Normal |
| GSM4626768_TGACTTTTCCGCAGTG-1  | GSM4626768 | Normal |
| GSM4626768_TGACTTTTCTATGTT-1   | GSM4626768 | Normal |
| GSM4626768_TGAGAGGAGACTGGGT-1  | GSM4626768 | Normal |
| GSM4626768_TGAGAGGAGATGTCGG-1  | GSM4626768 | Normal |
| GSM4626768_TGAGAGGAGCATGGCA-1  | GSM4626768 | Normal |
| GSM4626768_TGAGAGGAGCGAAGGG-1  | GSM4626768 | Normal |
| GSM4626768_TGAGAGGAGGACCACA-1  | GSM4626768 | Normal |
| GSM4626768_TGAGAGGCATTATCTC-1  | GSM4626768 | Normal |
| GSM4626768_TGAGAGGGTTCGAGTTT-1 | GSM4626768 | Normal |
| GSM4626768_TGAGAGGTCGGCTACG-1  | GSM4626768 | Normal |
| GSM4626768_TGAGAGGTCTCACATT-1  | GSM4626768 | Normal |
| GSM4626768_TGAGCATAGCGTTGCC-1  | GSM4626768 | Normal |
| GSM4626768_TGAGCATAGTTGAGTA-1  | GSM4626768 | Normal |
| GSM4626768_TGAGCATCAGCTCGCA-1  | GSM4626768 | Normal |
| GSM4626768_TGAGCATGTCTAGCGC-1  | GSM4626768 | Normal |
| GSM4626768_TGAGCATGTTACTGAC-1  | GSM4626768 | Normal |
| GSM4626768_TGAGCATTCTGTTACGA-1 | GSM4626768 | Normal |
| GSM4626768_TGAGCCGCAATTCCTT-1  | GSM4626768 | Normal |
| GSM4626768_TGAGCCGCACCGAAAG-1  | GSM4626768 | Normal |
| GSM4626768_TGAGCCGCAGCCTGTG-1  | GSM4626768 | Normal |
| GSM4626768_TGAGCCGCATCCCATC-1  | GSM4626768 | Normal |
| GSM4626768_TGAGCCGGTCTAGCGC-1  | GSM4626768 | Normal |
| GSM4626768_TGAGCCGTCCACGAAT-1  | GSM4626768 | Normal |
| GSM4626768_TGAGCCGTCTGTTGCC-1  | GSM4626768 | Normal |
| GSM4626768_TGAGGGAAGGGTGTG-1   | GSM4626768 | Normal |
| GSM4626768_TGAGGGAGTCCGAAGA-1  | GSM4626768 | Normal |
| GSM4626768_TGATTTTCAGACAGAGA-1 | GSM4626768 | Normal |
| GSM4626768_TGATTTTCAGTAGTCCG-1 | GSM4626768 | Normal |
| GSM4626768_TGATTTTCAGTCCAGGA-1 | GSM4626768 | Normal |
| GSM4626768_TGATTTTCAACACCCG-1  | GSM4626768 | Normal |
| GSM4626768_TGATTTTCCAGATTGCT-1 | GSM4626768 | Normal |
| GSM4626768_TGATTTTCCAGCATACT-1 | GSM4626768 | Normal |
| GSM4626768_TGATTTTCCAGCGAACA-1 | GSM4626768 | Normal |
| GSM4626768_TGATTTTCCATTAACCG-1 | GSM4626768 | Normal |
| GSM4626768_TGATTTTCCATTCTGCT-1 | GSM4626768 | Normal |
| GSM4626768_TGCACCTCACTGAAGG-1  | GSM4626768 | Normal |
| GSM4626768_TGCACCTCAGGCTCAC-1  | GSM4626768 | Normal |
| GSM4626768_TGCACCTCAGTGGAGT-1  | GSM4626768 | Normal |
| GSM4626768_TGCACCTGTTGGTGGA-1  | GSM4626768 | Normal |

|                                 |            |        |
|---------------------------------|------------|--------|
| GSM4626768_TGCACCTTCACCCGAG-1   | GSM4626768 | Normal |
| GSM4626768_TGCACCTTCCGAAGAG-1   | GSM4626768 | Normal |
| GSM4626768_TGCACCTTCTGTCAAG-1   | GSM4626768 | Normal |
| GSM4626768_TGCCAAACATACGCTA-1   | GSM4626768 | Normal |
| GSM4626768_TGCCAAAGTCGCTTTC-1   | GSM4626768 | Normal |
| GSM4626768_TGCCAAAGTGTGGTTT-1   | GSM4626768 | Normal |
| GSM4626768_TGCCAAATCATACGGT-1   | GSM4626768 | Normal |
| GSM4626768_TGCCAAATCGCAAAC-1    | GSM4626768 | Normal |
| GSM4626768_TGCCAAATCTGGAGCC-1   | GSM4626768 | Normal |
| GSM4626768_TGCCCATCAAAGGTGC-1   | GSM4626768 | Normal |
| GSM4626768_TGCCCATCAGCTTAAC-1   | GSM4626768 | Normal |
| GSM4626768_TGCCCATCAGGATCGA-1   | GSM4626768 | Normal |
| GSM4626768_TGCCCATCATGCTGGC-1   | GSM4626768 | Normal |
| GSM4626768_TGCCCATCATGGTTGT-1   | GSM4626768 | Normal |
| GSM4626768_TGCCCATCATGTTCGAT-1  | GSM4626768 | Normal |
| GSM4626768_TGCCCATGTAAAGTCA-1   | GSM4626768 | Normal |
| GSM4626768_TGCCCATGTGCACGAA-1   | GSM4626768 | Normal |
| GSM4626768_TGCCCATGTGTGGCTC-1   | GSM4626768 | Normal |
| GSM4626768_TGCCCATGTTTCATGGT-1  | GSM4626768 | Normal |
| GSM4626768_TGCCCATTCACCTTAT-1   | GSM4626768 | Normal |
| GSM4626768_TGCCCATTCCTCAACC-1   | GSM4626768 | Normal |
| GSM4626768_TGCCCTAAGCACCGCT-1   | GSM4626768 | Normal |
| GSM4626768_TGCCCTAAGCAGCCTC-1   | GSM4626768 | Normal |
| GSM4626768_TGCCCTAAGGGCTTCC-1   | GSM4626768 | Normal |
| GSM4626768_TGCCCTACAAGGTTTC-1   | GSM4626768 | Normal |
| GSM4626768_TGCCCTACACGCTTTC-1   | GSM4626768 | Normal |
| GSM4626768_TGCCCTACAGGCAGTA-1   | GSM4626768 | Normal |
| GSM4626768_TGCCCTACAGTGGAGT-1   | GSM4626768 | Normal |
| GSM4626768_TGCCCTAGTCTTCGTC-1   | GSM4626768 | Normal |
| GSM4626768_TGCCCTATCACGCATA-1   | GSM4626768 | Normal |
| GSM4626768_TGCCCTATCGGTCCGA-1   | GSM4626768 | Normal |
| GSM4626768_TGCGCAGAGTATGACA-1   | GSM4626768 | Normal |
| GSM4626768_TGCGCAGCAGGAACGT-1   | GSM4626768 | Normal |
| GSM4626768_TGCGCAGGTCATCGGC-1   | GSM4626768 | Normal |
| GSM4626768_TGCGCAGGTTTGGGCC-1   | GSM4626768 | Normal |
| GSM4626768_TGCGCAGTCAGCTCTC-1   | GSM4626768 | Normal |
| GSM4626768_TGCGCAGTCCCAAGAT-1   | GSM4626768 | Normal |
| GSM4626768_TGCGCAGTCCCTCAGT-1   | GSM4626768 | Normal |
| GSM4626768_TGCGCAGTCGCGATCG-1   | GSM4626768 | Normal |
| GSM4626768_TGCGCAGTCGTTGACA-1   | GSM4626768 | Normal |
| GSM4626768_TGCGCAGTCTCTGTTCG-1  | GSM4626768 | Normal |
| GSM4626768_TGCGGGTAGGGTGTGT-1   | GSM4626768 | Normal |
| GSM4626768_TGCGGGTCATGCCCGA-1   | GSM4626768 | Normal |
| GSM4626768_TGCGGGTGTATAAACG-1   | GSM4626768 | Normal |
| GSM4626768_TGCGGGTGTGAGCGAT-1   | GSM4626768 | Normal |
| GSM4626768_TGCGGGTGTGAGTATA-1   | GSM4626768 | Normal |
| GSM4626768_TGCGGGTGTAAAGATG-1   | GSM4626768 | Normal |
| GSM4626768_TGCGGGTTCGAATGGT-1   | GSM4626768 | Normal |
| GSM4626768_TGCGGGTTCGAATCCA-1   | GSM4626768 | Normal |
| GSM4626768_TGCGTGGAGACAGGCT-1   | GSM4626768 | Normal |
| GSM4626768_TGCGTGGAGACTTGAA-1   | GSM4626768 | Normal |
| GSM4626768_TGCGTGGAGGTCATCT-1   | GSM4626768 | Normal |
| GSM4626768_TGCGTGGAGTCCCACG-1   | GSM4626768 | Normal |
| GSM4626768_TGCGTGGCAGATGGCA-1   | GSM4626768 | Normal |
| GSM4626768_TGCGTGGTCTCTGCAGG-1  | GSM4626768 | Normal |
| GSM4626768_TGCGTGGTCCGGTGTTCG-1 | GSM4626768 | Normal |
| GSM4626768_TGCGTGGTCTCAAGTG-1   | GSM4626768 | Normal |

|                                |            |        |
|--------------------------------|------------|--------|
| GSM4626768_TGCTACCGTTCCACAA-1  | GSM4626768 | Normal |
| GSM4626768_TGCTACCTCAATACCG-1  | GSM4626768 | Normal |
| GSM4626768_TGCTACCTCAATCACG-1  | GSM4626768 | Normal |
| GSM4626768_TGCTACCTCCTCTAGC-1  | GSM4626768 | Normal |
| GSM4626768_TGCTACCTCTCTGAGA-1  | GSM4626768 | Normal |
| GSM4626768_TGCTACCTCTTACCTA-1  | GSM4626768 | Normal |
| GSM4626768_TGCTGCTAGCTAACAA-1  | GSM4626768 | Normal |
| GSM4626768_TGCTGCTAGTACGACG-1  | GSM4626768 | Normal |
| GSM4626768_TGCTGCTAGTCGAGTG-1  | GSM4626768 | Normal |
| GSM4626768_TGCTGCTCAGAAGCAC-1  | GSM4626768 | Normal |
| GSM4626768_TGCTGCTGTGCTGTAT-1  | GSM4626768 | Normal |
| GSM4626768_TGCTGCTTCATGTAGC-1  | GSM4626768 | Normal |
| GSM4626768_TGGACGCAGAGCTGGT-1  | GSM4626768 | Normal |
| GSM4626768_TGGACGCCAAGTTCTG-1  | GSM4626768 | Normal |
| GSM4626768_TGGACGCCAGGATCGA-1  | GSM4626768 | Normal |
| GSM4626768_TGGACGCCATGTCTCC-1  | GSM4626768 | Normal |
| GSM4626768_TGGACGCGTGGTCTCG-1  | GSM4626768 | Normal |
| GSM4626768_TGGACGCGTGTGAAAT-1  | GSM4626768 | Normal |
| GSM4626768_TGGACGCGTTATCGGT-1  | GSM4626768 | Normal |
| GSM4626768_TGGACGCGTTGCCTCT-1  | GSM4626768 | Normal |
| GSM4626768_TGGACGCTCACCTCA-1   | GSM4626768 | Normal |
| GSM4626768_TGGACGCTCCGAGTG-1   | GSM4626768 | Normal |
| GSM4626768_TGGACGCTCCTTGGTC-1  | GSM4626768 | Normal |
| GSM4626768_TGGCCAGAGGCTCATT-1  | GSM4626768 | Normal |
| GSM4626768_TGGCCAGAGTAAGTAC-1  | GSM4626768 | Normal |
| GSM4626768_TGGCCAGAGTTACGGG-1  | GSM4626768 | Normal |
| GSM4626768_TGGCCAGCAAACCTAC-1  | GSM4626768 | Normal |
| GSM4626768_TGGCCAGCAAACCTGTC-1 | GSM4626768 | Normal |
| GSM4626768_TGGCCAGCAATCGAAA-1  | GSM4626768 | Normal |
| GSM4626768_TGGCCAGCACAGTCGC-1  | GSM4626768 | Normal |
| GSM4626768_TGGCCAGCACTCGACG-1  | GSM4626768 | Normal |
| GSM4626768_TGGCCAGGTCCCGACA-1  | GSM4626768 | Normal |
| GSM4626768_TGGCGCAAGACTTTCG-1  | GSM4626768 | Normal |
| GSM4626768_TGGCGCAAGAGCAATT-1  | GSM4626768 | Normal |
| GSM4626768_TGGCGCAAGCAGACTG-1  | GSM4626768 | Normal |
| GSM4626768_TGGCGCAAGCGTGAGT-1  | GSM4626768 | Normal |
| GSM4626768_TGGCGCACACCGTTGG-1  | GSM4626768 | Normal |
| GSM4626768_TGGCGCACATAGGATA-1  | GSM4626768 | Normal |
| GSM4626768_TGGCGCACATCACGTA-1  | GSM4626768 | Normal |
| GSM4626768_TGGCGCACATGCATGT-1  | GSM4626768 | Normal |
| GSM4626768_TGGCGCAGTTATCGGT-1  | GSM4626768 | Normal |
| GSM4626768_TGGCGCAGTTGATTGC-1  | GSM4626768 | Normal |
| GSM4626768_TGGCGCATCACCACT-1   | GSM4626768 | Normal |
| GSM4626768_TGGCGCATCTGCTGCT-1  | GSM4626768 | Normal |
| GSM4626768_TGGCTGGAGACGCAAC-1  | GSM4626768 | Normal |
| GSM4626768_TGGCTGGAGGCTAGCA-1  | GSM4626768 | Normal |
| GSM4626768_TGGCTGGCATCACAAAC-1 | GSM4626768 | Normal |
| GSM4626768_TGGCTGGCATCCCATC-1  | GSM4626768 | Normal |
| GSM4626768_TGGCTGGGTATCGCAT-1  | GSM4626768 | Normal |
| GSM4626768_TGGCTGGGTCCGCTGA-1  | GSM4626768 | Normal |
| GSM4626768_TGGCTGGGTCTTCTCG-1  | GSM4626768 | Normal |
| GSM4626768_TGGCTGGGTGCACTTA-1  | GSM4626768 | Normal |
| GSM4626768_TGGCTGGGTTGGTAAA-1  | GSM4626768 | Normal |
| GSM4626768_TGGGAAGAGTGTCTCA-1  | GSM4626768 | Normal |
| GSM4626768_TGGGAAGCACAGGCCT-1  | GSM4626768 | Normal |
| GSM4626768_TGGGAAGCAGTATAAG-1  | GSM4626768 | Normal |
| GSM4626768_TGGGAAGCATCTCCCA-1  | GSM4626768 | Normal |

|                               |            |        |
|-------------------------------|------------|--------|
| GSM4626768_TGGGAAGGTACTCTCC-1 | GSM4626768 | Normal |
| GSM4626768_TGGGAAGGTATTCGTG-1 | GSM4626768 | Normal |
| GSM4626768_TGGGAAGTCCCTTGTG-1 | GSM4626768 | Normal |
| GSM4626768_TGGGAAGTCGAGAACG-1 | GSM4626768 | Normal |
| GSM4626768_TGGGAAGTCTTACCTA-1 | GSM4626768 | Normal |
| GSM4626768_TGGGCGTCAATAGCAA-1 | GSM4626768 | Normal |
| GSM4626768_TGGGCGTCAGCTGGCT-1 | GSM4626768 | Normal |
| GSM4626768_TGGGCGTCATGGTCTA-1 | GSM4626768 | Normal |
| GSM4626768_TGGGCGTGTAAGTCA-1  | GSM4626768 | Normal |
| GSM4626768_TGGGCGTGTGTCTGAT-1 | GSM4626768 | Normal |
| GSM4626768_TGGGCGTGTTTGCATG-1 | GSM4626768 | Normal |
| GSM4626768_TGGGCGTTCGCATGGC-1 | GSM4626768 | Normal |
| GSM4626768_TGGGCGTTCGTAGGTT-1 | GSM4626768 | Normal |
| GSM4626768_TGGTTAGAGAAAGTGG-1 | GSM4626768 | Normal |
| GSM4626768_TGGTTAGAGCCACTAT-1 | GSM4626768 | Normal |
| GSM4626768_TGGTTAGAGGAGCGTT-1 | GSM4626768 | Normal |
| GSM4626768_TGGTTAGCAGCTATTG-1 | GSM4626768 | Normal |
| GSM4626768_TGGTTAGGTCGCTTCT-1 | GSM4626768 | Normal |
| GSM4626768_TGGTTAGGTTTCGCTC-1 | GSM4626768 | Normal |
| GSM4626768_TGGTTAGTCAAGAAGT-1 | GSM4626768 | Normal |
| GSM4626768_TGGTTAGTCCCACTTG-1 | GSM4626768 | Normal |
| GSM4626768_TGGTTAGTCGAACTGT-1 | GSM4626768 | Normal |
| GSM4626768_TGGTTAGTCGAAACG-1  | GSM4626768 | Normal |
| GSM4626768_TGGTTAGTCGTTGACA-1 | GSM4626768 | Normal |
| GSM4626768_TGGTTAGTCTTGAGAC-1 | GSM4626768 | Normal |
| GSM4626768_TGGTTCCAGACGACGT-1 | GSM4626768 | Normal |
| GSM4626768_TGGTTCCAGACTTGAA-1 | GSM4626768 | Normal |
| GSM4626768_TGGTTCCAGAGAACAG-1 | GSM4626768 | Normal |
| GSM4626768_TGGTTCCCAATAAGCA-1 | GSM4626768 | Normal |
| GSM4626768_TGGTTCCAGGCAGTA-1  | GSM4626768 | Normal |
| GSM4626768_TGGTTCCAGTAAGAT-1  | GSM4626768 | Normal |
| GSM4626768_TGGTTCCGTGGTTTCA-1 | GSM4626768 | Normal |
| GSM4626768_TGGTTCCGTTCCACGG-1 | GSM4626768 | Normal |
| GSM4626768_TGGTTCCTCTGTTGAG-1 | GSM4626768 | Normal |
| GSM4626768_TGTATTCAGGGATACC-1 | GSM4626768 | Normal |
| GSM4626768_TGTATTCAGTCATGCT-1 | GSM4626768 | Normal |
| GSM4626768_TGTATTCACGCATCG-1  | GSM4626768 | Normal |
| GSM4626768_TGTATTCAGGTGGAT-1  | GSM4626768 | Normal |
| GSM4626768_TGTATTCATGCTGGC-1  | GSM4626768 | Normal |
| GSM4626768_TGTATTCGTAGTACCT-1 | GSM4626768 | Normal |
| GSM4626768_TGTATTCGTCTAGTCA-1 | GSM4626768 | Normal |
| GSM4626768_TGTATTCGTACGGC-1   | GSM4626768 | Normal |
| GSM4626768_TGTCCAAGAATTGTG-1  | GSM4626768 | Normal |
| GSM4626768_TGTCCAAGAGGTTGC-1  | GSM4626768 | Normal |
| GSM4626768_TGTCCAAGATCCCGC-1  | GSM4626768 | Normal |
| GSM4626768_TGTCCAAGCCACCTG-1  | GSM4626768 | Normal |
| GSM4626768_TGTCCAAGTGTCCAT-1  | GSM4626768 | Normal |
| GSM4626768_TGTCCACAAGCCTAT-1  | GSM4626768 | Normal |
| GSM4626768_TGTCCACACGAAGCA-1  | GSM4626768 | Normal |
| GSM4626768_TGTCCAGTAAATGTG-1  | GSM4626768 | Normal |
| GSM4626768_TGTCCAGTAGATTAG-1  | GSM4626768 | Normal |
| GSM4626768_TGTCCAGTCCGAAGA-1  | GSM4626768 | Normal |
| GSM4626768_TGTCCATCCGAGCCA-1  | GSM4626768 | Normal |
| GSM4626768_TGTGGTAAGGCCGAAT-1 | GSM4626768 | Normal |
| GSM4626768_TGTGGTAAGGCTAGCA-1 | GSM4626768 | Normal |
| GSM4626768_TGTGGTAAGGGAACGG-1 | GSM4626768 | Normal |
| GSM4626768_TGTGGTACAAGCCTAT-1 | GSM4626768 | Normal |

|                                |            |        |
|--------------------------------|------------|--------|
| GSM4626768_TGTGGTACACTCGACG-1  | GSM4626768 | Normal |
| GSM4626768_TGTGGTACAGATCCAT-1  | GSM4626768 | Normal |
| GSM4626768_TGTGGTACAGTGGAGT-1  | GSM4626768 | Normal |
| GSM4626768_TGTGGTAGTCAAAGCG-1  | GSM4626768 | Normal |
| GSM4626768_TGTGGTAGTCTCCATC-1  | GSM4626768 | Normal |
| GSM4626768_TGTGGTAGTCTGGTCG-1  | GSM4626768 | Normal |
| GSM4626768_TGTGGTATCAAACCGT-1  | GSM4626768 | Normal |
| GSM4626768_TGTGGTATCCACGTGG-1  | GSM4626768 | Normal |
| GSM4626768_TGTGGTATCCCGGATG-1  | GSM4626768 | Normal |
| GSM4626768_TGTGGTATCGTCGTT-1   | GSM4626768 | Normal |
| GSM4626768_TGTGGTATCTATGTGG-1  | GSM4626768 | Normal |
| GSM4626768_TGTGTTTTCCAGACTA-1  | GSM4626768 | Normal |
| GSM4626768_TGTGTTTTCATGGTCA-1  | GSM4626768 | Normal |
| GSM4626768_TGTGTTTTCCCGGATG-1  | GSM4626768 | Normal |
| GSM4626768_TGTGTTTTCGACGGAA-1  | GSM4626768 | Normal |
| GSM4626768_TGTGTTTTCGGCGCAT-1  | GSM4626768 | Normal |
| GSM4626768_TGTTCCGAGACAGACC-1  | GSM4626768 | Normal |
| GSM4626768_TGTTCCGAGACGCACA-1  | GSM4626768 | Normal |
| GSM4626768_TGTTCCGAGTAGATGT-1  | GSM4626768 | Normal |
| GSM4626768_TGTTCCGAGTGAATTG-1  | GSM4626768 | Normal |
| GSM4626768_TGTTCCGAGTTCGATC-1  | GSM4626768 | Normal |
| GSM4626768_TGTTCCGCATTCTCAT-1  | GSM4626768 | Normal |
| GSM4626768_TGTTCCGGTAATTGGA-1  | GSM4626768 | Normal |
| GSM4626768_TGTTCCGGTATTAGCC-1  | GSM4626768 | Normal |
| GSM4626768_TGTTCCGGTCCGAGTC-1  | GSM4626768 | Normal |
| GSM4626768_TGTTCCGGTTACCGAT-1  | GSM4626768 | Normal |
| GSM4626768_TGTTCCGTCTGAATGGG-1 | GSM4626768 | Normal |
| GSM4626768_TGTTCCGTCTGATCAG-1  | GSM4626768 | Normal |
| GSM4626768_TTAAGTCAAGTTTGCCT-1 | GSM4626768 | Normal |
| GSM4626768_TTAAGTCCACAGGCCT-1  | GSM4626768 | Normal |
| GSM4626768_TTAAGTCCACTAGTAC-1  | GSM4626768 | Normal |
| GSM4626768_TTAAGTCCAGTTCATG-1  | GSM4626768 | Normal |
| GSM4626768_TTAAGTCCATCGGAAG-1  | GSM4626768 | Normal |
| GSM4626768_TTAAGTCCATTTGCTT-1  | GSM4626768 | Normal |
| GSM4626768_TTAAGTCTGCTGGTCG-1  | GSM4626768 | Normal |
| GSM4626768_TTAAGTCTGTTAAAGAC-1 | GSM4626768 | Normal |
| GSM4626768_TTAAGTCTCCTCAACC-1  | GSM4626768 | Normal |
| GSM4626768_TTAAGTCTCGGTGTCTG-1 | GSM4626768 | Normal |
| GSM4626768_TTAGGACAGCCTCGTG-1  | GSM4626768 | Normal |
| GSM4626768_TTAGGACAGGCATGTG-1  | GSM4626768 | Normal |
| GSM4626768_TTAGGACAGTGTCCAT-1  | GSM4626768 | Normal |
| GSM4626768_TTAGGACAGTTATCGC-1  | GSM4626768 | Normal |
| GSM4626768_TTAGGACCAACCGCCA-1  | GSM4626768 | Normal |
| GSM4626768_TTAGGACCAAGGCATA-1  | GSM4626768 | Normal |
| GSM4626768_TTAGGACGTAGTAGTA-1  | GSM4626768 | Normal |
| GSM4626768_TTAGGACGTATGCTTG-1  | GSM4626768 | Normal |
| GSM4626768_TTAGGACTCCCAAGAT-1  | GSM4626768 | Normal |
| GSM4626768_TTAGGACTCGAATCCA-1  | GSM4626768 | Normal |
| GSM4626768_TTAGGACTCGGTGTTA-1  | GSM4626768 | Normal |
| GSM4626768_TTAGGCAAGAGTTGGC-1  | GSM4626768 | Normal |
| GSM4626768_TTAGGCAAGTACGATA-1  | GSM4626768 | Normal |
| GSM4626768_TTAGGCAAGTTAACGA-1  | GSM4626768 | Normal |
| GSM4626768_TTAGGCACACGTGAGA-1  | GSM4626768 | Normal |
| GSM4626768_TTAGGCAGTAGTGAAT-1  | GSM4626768 | Normal |
| GSM4626768_TTAGGCAGTTGTTTGG-1  | GSM4626768 | Normal |
| GSM4626768_TTAGGCAGTTTGGACTG-1 | GSM4626768 | Normal |
| GSM4626768_TTAGGCATCGAATGGG-1  | GSM4626768 | Normal |

|                                |            |        |
|--------------------------------|------------|--------|
| GSM4626768_TTAGGCATCGTACGGC-1  | GSM4626768 | Normal |
| GSM4626768_TTAGGCATCTGCAAGT-1  | GSM4626768 | Normal |
| GSM4626768_TTAGTTCAGACTCGGA-1  | GSM4626768 | Normal |
| GSM4626768_TTAGTTCCAAGCCATT-1  | GSM4626768 | Normal |
| GSM4626768_TTAGTTCCAGTTAACC-1  | GSM4626768 | Normal |
| GSM4626768_TTAGTTCCATACGCCG-1  | GSM4626768 | Normal |
| GSM4626768_TTAGTTCCATAGGATA-1  | GSM4626768 | Normal |
| GSM4626768_TTAGTTCGTACCGTTA-1  | GSM4626768 | Normal |
| GSM4626768_TTAGTTCGTAGCTTGT-1  | GSM4626768 | Normal |
| GSM4626768_TTAGTTCGTGCAGACA-1  | GSM4626768 | Normal |
| GSM4626768_TTAGTTCTCCTCATT-1   | GSM4626768 | Normal |
| GSM4626768_TTAGTTCTCGGGAGTA-1  | GSM4626768 | Normal |
| GSM4626768_TTAGTTCTCTGCTGTC-1  | GSM4626768 | Normal |
| GSM4626768_TTATGCTAGATGTCGG-1  | GSM4626768 | Normal |
| GSM4626768_TTATGCTAGCTGTTCA-1  | GSM4626768 | Normal |
| GSM4626768_TTATGCTAGGCATTGG-1  | GSM4626768 | Normal |
| GSM4626768_TTATGCTCAAGGACAC-1  | GSM4626768 | Normal |
| GSM4626768_TTATGCTCACAGCCCA-1  | GSM4626768 | Normal |
| GSM4626768_TTATGCTCATGCCCGA-1  | GSM4626768 | Normal |
| GSM4626768_TTATGCTCATTCACTT-1  | GSM4626768 | Normal |
| GSM4626768_TTATGCTCATTCTCAT-1  | GSM4626768 | Normal |
| GSM4626768_TTATGCTGTCAAACCTC-1 | GSM4626768 | Normal |
| GSM4626768_TTATGCTGTTGATTGCG-1 | GSM4626768 | Normal |
| GSM4626768_TTATGCTGTTTGACTG-1  | GSM4626768 | Normal |
| GSM4626768_TTATGCTTCACCTTAT-1  | GSM4626768 | Normal |
| GSM4626768_TTATGCTTCCGCAAGC-1  | GSM4626768 | Normal |
| GSM4626768_TTATGCTTCTGAGTGT-1  | GSM4626768 | Normal |
| GSM4626768_TTCCCAGAGCAATATG-1  | GSM4626768 | Normal |
| GSM4626768_TTCCCAGAGCGTAGTG-1  | GSM4626768 | Normal |
| GSM4626768_TTCCCAGAGGCACATG-1  | GSM4626768 | Normal |
| GSM4626768_TTCCCAGCAAATCCGT-1  | GSM4626768 | Normal |
| GSM4626768_TTCCCAGCACCAGGTC-1  | GSM4626768 | Normal |
| GSM4626768_TTCCCAGCACCAGTTA-1  | GSM4626768 | Normal |
| GSM4626768_TTCCCAGCATACGCTA-1  | GSM4626768 | Normal |
| GSM4626768_TTCCCAGGTCCGTTAA-1  | GSM4626768 | Normal |
| GSM4626768_TTCCAAGCACAGACTT-1  | GSM4626768 | Normal |
| GSM4626768_TTCCAAGCACCAGGCT-1  | GSM4626768 | Normal |
| GSM4626768_TTCCAAGCATTCTCAT-1  | GSM4626768 | Normal |
| GSM4626768_TTCCAAGGTCCGGTCT-1  | GSM4626768 | Normal |
| GSM4626768_TTCCAAGGTTCCATGA-1  | GSM4626768 | Normal |
| GSM4626768_TTCCAAGTCCAGATCA-1  | GSM4626768 | Normal |
| GSM4626768_TTCCAAGTCCGTCATC-1  | GSM4626768 | Normal |
| GSM4626768_TTCCAAGTCTTGACGA-1  | GSM4626768 | Normal |
| GSM4626768_TTCCGGTCAGAGAACAG-1 | GSM4626768 | Normal |
| GSM4626768_TTCCGGTCAGGACTGGT-1 | GSM4626768 | Normal |
| GSM4626768_TTCCGGTCAGTGGTCCC-1 | GSM4626768 | Normal |
| GSM4626768_TTCCGGTCAGTTAGGTA-1 | GSM4626768 | Normal |
| GSM4626768_TTCCGGTCCACCTTGTC-1 | GSM4626768 | Normal |
| GSM4626768_TTCCGGTCCACTCTGTC-1 | GSM4626768 | Normal |
| GSM4626768_TTCCGGTCCAGGGTATG-1 | GSM4626768 | Normal |
| GSM4626768_TTCCGGTCGTGACCAAG-1 | GSM4626768 | Normal |
| GSM4626768_TTCCGGTCTCACGGTTA-1 | GSM4626768 | Normal |
| GSM4626768_TTCCGGTCTCACTTACT-1 | GSM4626768 | Normal |
| GSM4626768_TTCCGGTCTCCCACTTG-1 | GSM4626768 | Normal |
| GSM4626768_TTCCGGTCTCCGCATAA-1 | GSM4626768 | Normal |
| GSM4626768_TTCTACAAGAAGGGTA-1  | GSM4626768 | Normal |
| GSM4626768_TTCTACAAGATCACGG-1  | GSM4626768 | Normal |



|                                |            |        |
|--------------------------------|------------|--------|
| GSM4626768_TTCTACAAGCGATAGC-1  | GSM4626768 | Normal |
| GSM4626768_TTCTACAAGGCCGAAT-1  | GSM4626768 | Normal |
| GSM4626768_TTCTACAAGTGCCATT-1  | GSM4626768 | Normal |
| GSM4626768_TTCTACACACGGTTTA-1  | GSM4626768 | Normal |
| GSM4626768_TTCTACACAGACAGGT-1  | GSM4626768 | Normal |
| GSM4626768_TTCTACACAGTTCCT-1   | GSM4626768 | Normal |
| GSM4626768_TTCTACAGTGCAATC-1   | GSM4626768 | Normal |
| GSM4626768_TTCTACATCACCCCTCA-1 | GSM4626768 | Normal |
| GSM4626768_TTCTACATCATGCAAC-1  | GSM4626768 | Normal |
| GSM4626768_TTCTACATCATTCACT-1  | GSM4626768 | Normal |
| GSM4626768_TTCTACATCTTGTCAT-1  | GSM4626768 | Normal |
| GSM4626768_TTCTCAAAGCGAAGGG-1  | GSM4626768 | Normal |
| GSM4626768_TTCTCAAAGTCAAGCG-1  | GSM4626768 | Normal |
| GSM4626768_TTCTCAAAGTCAAGGC-1  | GSM4626768 | Normal |
| GSM4626768_TTCTCAAAGTCGTTTG-1  | GSM4626768 | Normal |
| GSM4626768_TTCTCAACAACGCACC-1  | GSM4626768 | Normal |
| GSM4626768_TTCTCAACATACAGCT-1  | GSM4626768 | Normal |
| GSM4626768_TTCTCAACATCTCGCT-1  | GSM4626768 | Normal |
| GSM4626768_TTCTCAAGTACCAGTT-1  | GSM4626768 | Normal |
| GSM4626768_TTCTCAAGTAGCGCAA-1  | GSM4626768 | Normal |
| GSM4626768_TTCTCAAGTCTAGGTT-1  | GSM4626768 | Normal |
| GSM4626768_TTCTCAAGTGAACCTT-1  | GSM4626768 | Normal |
| GSM4626768_TTCTCCTAGAGGTTGC-1  | GSM4626768 | Normal |
| GSM4626768_TTCTCCTAGCGTAGTG-1  | GSM4626768 | Normal |
| GSM4626768_TTCTCCTAGGTTACCT-1  | GSM4626768 | Normal |
| GSM4626768_TTCTCCTCAAGCCCAC-1  | GSM4626768 | Normal |
| GSM4626768_TTCTCCTCAGCCAATT-1  | GSM4626768 | Normal |
| GSM4626768_TTCTCCTCATCTATGG-1  | GSM4626768 | Normal |
| GSM4626768_TTCTCCTCATTCTCAT-1  | GSM4626768 | Normal |
| GSM4626768_TTCTCCTGTCAGATAA-1  | GSM4626768 | Normal |
| GSM4626768_TTCTCCTGTGCGGCTCA-1 | GSM4626768 | Normal |
| GSM4626768_TTCTCCTTCTAGAAC-1   | GSM4626768 | Normal |
| GSM4626768_TTCTCCTTCGATGAGG-1  | GSM4626768 | Normal |
| GSM4626768_TTCTCCTTCTACTTAC-1  | GSM4626768 | Normal |
| GSM4626768_TTCTCCTTCTGGCGAC-1  | GSM4626768 | Normal |
| GSM4626768_TTCTTAGAGATAGCAT-1  | GSM4626768 | Normal |
| GSM4626768_TTCTTAGAGCCAGAAC-1  | GSM4626768 | Normal |
| GSM4626768_TTCTTAGAGCGTTTAC-1  | GSM4626768 | Normal |
| GSM4626768_TTCTTAGAGTTGAGTA-1  | GSM4626768 | Normal |
| GSM4626768_TTCTTAGCACATGGGA-1  | GSM4626768 | Normal |
| GSM4626768_TTCTTAGGTAACCAAC-1  | GSM4626768 | Normal |
| GSM4626768_TTCTTAGGTCTAAAGA-1  | GSM4626768 | Normal |
| GSM4626768_TTCTTAGTCAACCCTCA-1 | GSM4626768 | Normal |
| GSM4626768_TTCTTAGTCTTAGAGC-1  | GSM4626768 | Normal |
| GSM4626768_TTGAACGAGTACCGGA-1  | GSM4626768 | Normal |
| GSM4626768_TTGAACGCAATTCCTT-1  | GSM4626768 | Normal |
| GSM4626768_TTGAACGCACGGACAA-1  | GSM4626768 | Normal |
| GSM4626768_TTGAACGGTAGCTTGT-1  | GSM4626768 | Normal |
| GSM4626768_TTGAACGTCACGCATA-1  | GSM4626768 | Normal |
| GSM4626768_TTGAACGTCAGCACAT-1  | GSM4626768 | Normal |
| GSM4626768_TTGAACGTCCTCAACC-1  | GSM4626768 | Normal |
| GSM4626768_TTGAACGTCGCATGGC-1  | GSM4626768 | Normal |
| GSM4626768_TTGAACGTCTAACTTC-1  | GSM4626768 | Normal |
| GSM4626768_TTGAACGTCTTGACGA-1  | GSM4626768 | Normal |
| GSM4626768_TTGACTTAGAGGTTAT-1  | GSM4626768 | Normal |
| GSM4626768_TTGACTTGTCGAGTTT-1  | GSM4626768 | Normal |
| GSM4626768_TTGACTTGTGAGGGTT-1  | GSM4626768 | Normal |

|                                 |            |        |
|---------------------------------|------------|--------|
| GSM4626768_TTGACTTTCGCCTGTT-1   | GSM4626768 | Normal |
| GSM4626768_TTGCCGTAGAGCTGGT-1   | GSM4626768 | Normal |
| GSM4626768_TTGCCGTAGATACACA-1   | GSM4626768 | Normal |
| GSM4626768_TTGCCGTCAAACGCGA-1   | GSM4626768 | Normal |
| GSM4626768_TTGCCGTCAATCAGAA-1   | GSM4626768 | Normal |
| GSM4626768_TTGCCGTGAGGAATCG-1   | GSM4626768 | Normal |
| GSM4626768_TTGCCGTGATTCTGC-1    | GSM4626768 | Normal |
| GSM4626768_TTGCCGTGTGCGAAAC-1   | GSM4626768 | Normal |
| GSM4626768_TTGCCGTGTGTTTCGAT-1  | GSM4626768 | Normal |
| GSM4626768_TTGCCGTGTTCTGTTT-1   | GSM4626768 | Normal |
| GSM4626768_TTGCCGTGTTTCCACC-1   | GSM4626768 | Normal |
| GSM4626768_TTGCCGTTCAAACGGG-1   | GSM4626768 | Normal |
| GSM4626768_TTGCCGTTCATATCGG-1   | GSM4626768 | Normal |
| GSM4626768_TTGCCGTTCCTCAAGTA-1  | GSM4626768 | Normal |
| GSM4626768_TTGCGTCAGAATAGGG-1   | GSM4626768 | Normal |
| GSM4626768_TTGCGTCAGCACGCCT-1   | GSM4626768 | Normal |
| GSM4626768_TTGCGTCAGCTGTTCA-1   | GSM4626768 | Normal |
| GSM4626768_TTGCGTCAGGATGCGT-1   | GSM4626768 | Normal |
| GSM4626768_TTGCGTCAGGCGACAT-1   | GSM4626768 | Normal |
| GSM4626768_TTGCGTCCAAACTGTC-1   | GSM4626768 | Normal |
| GSM4626768_TTGCGTCCACCGCTAG-1   | GSM4626768 | Normal |
| GSM4626768_TTGCGTCCACGCATCG-1   | GSM4626768 | Normal |
| GSM4626768_TTGCGTCGTAGCGTGA-1   | GSM4626768 | Normal |
| GSM4626768_TTGCGTCGTTACGGAG-1   | GSM4626768 | Normal |
| GSM4626768_TTGCGTCTCTAGCACA-1   | GSM4626768 | Normal |
| GSM4626768_TTGGAACAGGAGTTGC-1   | GSM4626768 | Normal |
| GSM4626768_TTGGAACAGTGCCTGA-1   | GSM4626768 | Normal |
| GSM4626768_TTGGAACAGTTCGATC-1   | GSM4626768 | Normal |
| GSM4626768_TTGGAACAGATAATG-1    | GSM4626768 | Normal |
| GSM4626768_TTGGAACATCCGCGA-1    | GSM4626768 | Normal |
| GSM4626768_TTGGAACGTAGCGTCC-1   | GSM4626768 | Normal |
| GSM4626768_TTGGAACGTATTAGCC-1   | GSM4626768 | Normal |
| GSM4626768_TTGGAACGTCTCATCC-1   | GSM4626768 | Normal |
| GSM4626768_TTGGAACGTGGTGTAG-1   | GSM4626768 | Normal |
| GSM4626768_TTGGAACGTAAAGACA-1   | GSM4626768 | Normal |
| GSM4626768_TTGGAACTCATCTGCC-1   | GSM4626768 | Normal |
| GSM4626768_TTGGAACTCGGTGTGCG-1  | GSM4626768 | Normal |
| GSM4626768_TTGCAAAGAATGTGT-1    | GSM4626768 | Normal |
| GSM4626768_TTGCAAAGGCTCATT-1    | GSM4626768 | Normal |
| GSM4626768_TTGCAAAGTACACCT-1    | GSM4626768 | Normal |
| GSM4626768_TTGCAAAGTCTTTCAT-1   | GSM4626768 | Normal |
| GSM4626768_TTGCAAAGTTGCGCAC-1   | GSM4626768 | Normal |
| GSM4626768_TTGCAAATCCCAAGAT-1   | GSM4626768 | Normal |
| GSM4626768_TTGCAAATCGGATGTT-1   | GSM4626768 | Normal |
| GSM4626768_TTGCAAATCGGCTTGG-1   | GSM4626768 | Normal |
| GSM4626768_TTGTAAGGAGCGATGAC-1  | GSM4626768 | Normal |
| GSM4626768_TTGTAAGGACACGAGGTC-1 | GSM4626768 | Normal |
| GSM4626768_TTGTAAGGACAGAGGTA-1  | GSM4626768 | Normal |
| GSM4626768_TTGTAAGGACAGATGGGT-1 | GSM4626768 | Normal |
| GSM4626768_TTGTAAGGTTAGGGTG-1   | GSM4626768 | Normal |
| GSM4626768_TTGTAAGGTTCCACGG-1   | GSM4626768 | Normal |
| GSM4626768_TTGTAAGTCTTGCATT-1   | GSM4626768 | Normal |
| GSM4626768_TTTACTGAGATCCTGT-1   | GSM4626768 | Normal |
| GSM4626768_TTTACTGAGGATCGCA-1   | GSM4626768 | Normal |
| GSM4626768_TTTACTGAGTACGCGA-1   | GSM4626768 | Normal |
| GSM4626768_TTTACTGCACAACGTT-1   | GSM4626768 | Normal |
| GSM4626768_TTTACTGCAGTTAACC-1   | GSM4626768 | Normal |

|                                |            |        |
|--------------------------------|------------|--------|
| GSM4626768_TTTACTGCATTACGAC-1  | GSM4626768 | Normal |
| GSM4626768_TTTACTGGTCCCGACA-1  | GSM4626768 | Normal |
| GSM4626768_TTTACTGGTCCCTTGT-1  | GSM4626768 | Normal |
| GSM4626768_TTTACTGGTGGTAACG-1  | GSM4626768 | Normal |
| GSM4626768_TTTACTGTCATGCATG-1  | GSM4626768 | Normal |
| GSM4626768_TTTACTGTCTCGAAACG-1 | GSM4626768 | Normal |
| GSM4626768_TTTACTGTCTGATACG-1  | GSM4626768 | Normal |
| GSM4626768_TTTACTGTCTGATTCT-1  | GSM4626768 | Normal |
| GSM4626768_TTTATGCAGCCAGGAT-1  | GSM4626768 | Normal |
| GSM4626768_TTTATGCAGCCCAACC-1  | GSM4626768 | Normal |
| GSM4626768_TTTATGCAGCTCCCAG-1  | GSM4626768 | Normal |
| GSM4626768_TTTATGCAGGAGTACC-1  | GSM4626768 | Normal |
| GSM4626768_TTTATGCAGGATGGAA-1  | GSM4626768 | Normal |
| GSM4626768_TTTATGCCAGATCCAT-1  | GSM4626768 | Normal |
| GSM4626768_TTTATGCCATTGTGCA-1  | GSM4626768 | Normal |
| GSM4626768_TTTATGCGTAGCGTAG-1  | GSM4626768 | Normal |
| GSM4626768_TTTATGCGTAGGCTGA-1  | GSM4626768 | Normal |
| GSM4626768_TTTATGCGTGCTAGCC-1  | GSM4626768 | Normal |
| GSM4626768_TTTATGCGTGTATGGG-1  | GSM4626768 | Normal |
| GSM4626768_TTTATGCGTGTTAAGA-1  | GSM4626768 | Normal |
| GSM4626768_TTTATGCTCACGATGT-1  | GSM4626768 | Normal |
| GSM4626768_TTTATGCTCATCGGAT-1  | GSM4626768 | Normal |
| GSM4626768_TTTATGCTCCTACAGA-1  | GSM4626768 | Normal |
| GSM4626768_TTTATGCTCTCTAGGA-1  | GSM4626768 | Normal |
| GSM4626768_TTTCCTCAGCGCTCCA-1  | GSM4626768 | Normal |
| GSM4626768_TTTCCTCAGGCTATCT-1  | GSM4626768 | Normal |
| GSM4626768_TTTCCTCAGGTGCTTT-1  | GSM4626768 | Normal |
| GSM4626768_TTTCCTCCAACCCAT-1   | GSM4626768 | Normal |
| GSM4626768_TTTCCTCCAAGACACG-1  | GSM4626768 | Normal |
| GSM4626768_TTTCCTCCAGATGAGC-1  | GSM4626768 | Normal |
| GSM4626768_TTTCCTCCAGGTTTCA-1  | GSM4626768 | Normal |
| GSM4626768_TTTCCTCCATGGGACA-1  | GSM4626768 | Normal |
| GSM4626768_TTTCCTCGTCTCCACT-1  | GSM4626768 | Normal |
| GSM4626768_TTTCCTCGTCTGGAGA-1  | GSM4626768 | Normal |
| GSM4626768_TTTCCTCGTGCTCTTC-1  | GSM4626768 | Normal |
| GSM4626768_TTTCCTCTCCCAGGTG-1  | GSM4626768 | Normal |
| GSM4626768_TTTCCTCTCGTCCGTT-1  | GSM4626768 | Normal |
| GSM4626768_TTTGCGCAGAAGGCCT-1  | GSM4626768 | Normal |
| GSM4626768_TTTGCGCAGATCCGAG-1  | GSM4626768 | Normal |
| GSM4626768_TTTGCGCAGCGTCAAG-1  | GSM4626768 | Normal |
| GSM4626768_TTTGCGCGTAGCCTAT-1  | GSM4626768 | Normal |
| GSM4626768_TTTGCGCGTTCCACTC-1  | GSM4626768 | Normal |
| GSM4626768_TTTGCGCGTTGATTGC-1  | GSM4626768 | Normal |
| GSM4626768_TTTGCGCGTTTGTTGG-1  | GSM4626768 | Normal |
| GSM4626768_TTTGCGCTCAGTCCCT-1  | GSM4626768 | Normal |
| GSM4626768_TTTGCGCTCATGTGGT-1  | GSM4626768 | Normal |
| GSM4626768_TTTGCGCTCCACGACG-1  | GSM4626768 | Normal |
| GSM4626768_TTTGCGCTCGGCGCTA-1  | GSM4626768 | Normal |
| GSM4626768_TTTGCGCTCTGAAAGA-1  | GSM4626768 | Normal |
| GSM4626768_TTTGGTTAGCCTATGT-1  | GSM4626768 | Normal |
| GSM4626768_TTTGGTTAGGTGCTTT-1  | GSM4626768 | Normal |
| GSM4626768_TTTGGTTCAACTGGCC-1  | GSM4626768 | Normal |
| GSM4626768_TTTGGTTCACAAGTAA-1  | GSM4626768 | Normal |
| GSM4626768_TTTGGTTCAGGACCCT-1  | GSM4626768 | Normal |
| GSM4626768_TTTGGTTCATTCTGC-1   | GSM4626768 | Normal |
| GSM4626768_TTTGGTTGTAGCGTGA-1  | GSM4626768 | Normal |
| GSM4626768_TTTGGTTTCTACAGA-1   | GSM4626768 | Normal |

|                                |            |        |
|--------------------------------|------------|--------|
| GSM4626768_TTTGGTTTCGACCAGC-1  | GSM4626768 | Normal |
| GSM4626768_TTTGTCAAGAAAGTGG-1  | GSM4626768 | Normal |
| GSM4626768_TTTGTCAAGACCTAGG-1  | GSM4626768 | Normal |
| GSM4626768_TTTGTCAAGGCCGAAT-1  | GSM4626768 | Normal |
| GSM4626768_TTTGTCAAGTTGTCGT-1  | GSM4626768 | Normal |
| GSM4626768_TTTGTCACACTTAACG-1  | GSM4626768 | Normal |
| GSM4626768_TTTGTCACAGATGGCA-1  | GSM4626768 | Normal |
| GSM4626768_TTTGTCACAGGGTTAG-1  | GSM4626768 | Normal |
| GSM4626768_TTTGTCAGTAATCGTC-1  | GSM4626768 | Normal |
| GSM4626768_TTTGTCAGTAGTGAAT-1  | GSM4626768 | Normal |
| GSM4626768_TTTGTCAGTATATGGA-1  | GSM4626768 | Normal |
| GSM4626768_TTTGTCAGTGCACGAA-1  | GSM4626768 | Normal |
| GSM4626768_TTTGTCATCCTAAGTG-1  | GSM4626768 | Normal |
| GSM4626769_AAACCTGGTAGCACGA-1  | GSM4626769 | OA     |
| GSM4626769_AAACGGGAGGCAGGTT-1  | GSM4626769 | OA     |
| GSM4626769_AAACGGGCAAATACAG-1  | GSM4626769 | OA     |
| GSM4626769_AAACGGGCAAGAGTCG-1  | GSM4626769 | OA     |
| GSM4626769_AAACGGGCACCGCTAG-1  | GSM4626769 | OA     |
| GSM4626769_AAACGGGCAGTCTTCC-1  | GSM4626769 | OA     |
| GSM4626769_AAACGGGCATCGACGC-1  | GSM4626769 | OA     |
| GSM4626769_AAACGGGTCACAGGCC-1  | GSM4626769 | OA     |
| GSM4626769_AAACGGGTCAGCTCTC-1  | GSM4626769 | OA     |
| GSM4626769_AAACGGGTCCTGCAGG-1  | GSM4626769 | OA     |
| GSM4626769_AAACGGGTCTTATCTG-1  | GSM4626769 | OA     |
| GSM4626769_AAAGATGAGGAATCGC-1  | GSM4626769 | OA     |
| GSM4626769_AAAGATGCAAGTAATG-1  | GSM4626769 | OA     |
| GSM4626769_AAAGATGCAGTTCCTT-1  | GSM4626769 | OA     |
| GSM4626769_AAAGATGGTAATAGCA-1  | GSM4626769 | OA     |
| GSM4626769_AAAGCAAAGTATCGAA-1  | GSM4626769 | OA     |
| GSM4626769_AAAGCAACACGAAAGC-1  | GSM4626769 | OA     |
| GSM4626769_AAAGCAACAGCTATTG-1  | GSM4626769 | OA     |
| GSM4626769_AAAGCAACAGGCAGTA-1  | GSM4626769 | OA     |
| GSM4626769_AAAGCAAGTTCTGTTT-1  | GSM4626769 | OA     |
| GSM4626769_AAAGCAATCGTTTGCC-1  | GSM4626769 | OA     |
| GSM4626769_AAAGTAGAGATGCCTT-1  | GSM4626769 | OA     |
| GSM4626769_AAAGTAGAGCATGGCA-1  | GSM4626769 | OA     |
| GSM4626769_AAAGTAGAGGTTCCCTA-1 | GSM4626769 | OA     |
| GSM4626769_AAAGTAGCACAAGCCC-1  | GSM4626769 | OA     |
| GSM4626769_AAAGTAGTCAGAAATG-1  | GSM4626769 | OA     |
| GSM4626769_AAAGTAGTCCATTAT-1   | GSM4626769 | OA     |
| GSM4626769_AAAGTAGTCCTATGTT-1  | GSM4626769 | OA     |
| GSM4626769_AAAGTAGTCTATCCTA-1  | GSM4626769 | OA     |
| GSM4626769_AAATGCCAGTACACCT-1  | GSM4626769 | OA     |
| GSM4626769_AAATGCCAGTGAACGC-1  | GSM4626769 | OA     |
| GSM4626769_AAATGCCAGTTTGCCT-1  | GSM4626769 | OA     |
| GSM4626769_AAATGCCATAAGACA-1   | GSM4626769 | OA     |
| GSM4626769_AAATGCCCATGGGAAC-1  | GSM4626769 | OA     |
| GSM4626769_AAATGCCGTGCAGTAG-1  | GSM4626769 | OA     |
| GSM4626769_AACACGTAGAATTGTG-1  | GSM4626769 | OA     |
| GSM4626769_AACACGTAGCAGGTCA-1  | GSM4626769 | OA     |
| GSM4626769_AACACGTAGGAGTCTG-1  | GSM4626769 | OA     |
| GSM4626769_AACACGTCAAGTTAAG-1  | GSM4626769 | OA     |
| GSM4626769_AACACGTCAATAGAGT-1  | GSM4626769 | OA     |
| GSM4626769_AACACGTCAATCCAAC-1  | GSM4626769 | OA     |
| GSM4626769_AACACGTGTAAATGTG-1  | GSM4626769 | OA     |
| GSM4626769_AACACGTGTTAAAGTG-1  | GSM4626769 | OA     |
| GSM4626769_AACACGTTCTGGCCA-1   | GSM4626769 | OA     |

|                               |            |    |
|-------------------------------|------------|----|
| GSM4626769_AACCATGAGAGCAATT-1 | GSM4626769 | OA |
| GSM4626769_AACCATGAGGCTAGAC-1 | GSM4626769 | OA |
| GSM4626769_AACCATGAGGCTCATT-1 | GSM4626769 | OA |
| GSM4626769_AACCATGAGGTTCTTA-1 | GSM4626769 | OA |
| GSM4626769_AACCATGCAGACAAAT-1 | GSM4626769 | OA |
| GSM4626769_AACCATGGTAGAGTGC-1 | GSM4626769 | OA |
| GSM4626769_AACCATGGTATTACCG-1 | GSM4626769 | OA |
| GSM4626769_AACCATGTCCCTCTTT-1 | GSM4626769 | OA |
| GSM4626769_AACCGCGAGCAGCCTC-1 | GSM4626769 | OA |
| GSM4626769_AACCGCGAGGGTATCG-1 | GSM4626769 | OA |
| GSM4626769_AACCGCGAGGTTCTTA-1 | GSM4626769 | OA |
| GSM4626769_AACCGCGCAACACCTA-1 | GSM4626769 | OA |
| GSM4626769_AACCGCGCACGGCGTT-1 | GSM4626769 | OA |
| GSM4626769_AACCGCGGTACTTAGC-1 | GSM4626769 | OA |
| GSM4626769_AACCGCGGTCAAAGCG-1 | GSM4626769 | OA |
| GSM4626769_AACCGCGGTGCAACGA-1 | GSM4626769 | OA |
| GSM4626769_AACCGCGTACATGCA-1  | GSM4626769 | OA |
| GSM4626769_AACGTTGAGACCTAGG-1 | GSM4626769 | OA |
| GSM4626769_AACGTTGAGGGCACTA-1 | GSM4626769 | OA |
| GSM4626769_AACGTTGAGTCTCAAC-1 | GSM4626769 | OA |
| GSM4626769_AACGTTGCAAGTAGTA-1 | GSM4626769 | OA |
| GSM4626769_AACGTTGCACCCATTC-1 | GSM4626769 | OA |
| GSM4626769_AACGTTGCACCGCTAG-1 | GSM4626769 | OA |
| GSM4626769_AACGTTGCAGAGTGTG-1 | GSM4626769 | OA |
| GSM4626769_AACGTTGGTCAAGCGA-1 | GSM4626769 | OA |
| GSM4626769_AACGTTGTCGCAAAC-1  | GSM4626769 | OA |
| GSM4626769_AACTCAGCAAACGCT-1  | GSM4626769 | OA |
| GSM4626769_AACTCAGCAAGCCGCT-1 | GSM4626769 | OA |
| GSM4626769_AACTCAGCACTTAAGC-1 | GSM4626769 | OA |
| GSM4626769_AACTCAGGTCATTAGC-1 | GSM4626769 | OA |
| GSM4626769_AACTCCCAGACCCACC-1 | GSM4626769 | OA |
| GSM4626769_AACTCCCAGGACAGCT-1 | GSM4626769 | OA |
| GSM4626769_AACTCCCAGTAGTGCG-1 | GSM4626769 | OA |
| GSM4626769_AACTCCCACGTCTCT-1  | GSM4626769 | OA |
| GSM4626769_AACTCCCATTCTCTCG-1 | GSM4626769 | OA |
| GSM4626769_AACTCCCGTCACACGC-1 | GSM4626769 | OA |
| GSM4626769_AACTCCCGTGAAAGAG-1 | GSM4626769 | OA |
| GSM4626769_AACTCCCGTGACGGTA-1 | GSM4626769 | OA |
| GSM4626769_AACTCCCTCTAACTGG-1 | GSM4626769 | OA |
| GSM4626769_AACTCTTAGCGTCTAT-1 | GSM4626769 | OA |
| GSM4626769_AACTCTTCAAACCCAT-1 | GSM4626769 | OA |
| GSM4626769_AACTCTTCAATGAATG-1 | GSM4626769 | OA |
| GSM4626769_AACTCTTGTACGCACC-1 | GSM4626769 | OA |
| GSM4626769_AACTCTTTCAACGCTA-1 | GSM4626769 | OA |
| GSM4626769_AACTCTTTTCGCGCAA-1 | GSM4626769 | OA |
| GSM4626769_AACTCTTTCTTCTGGC-1 | GSM4626769 | OA |
| GSM4626769_AACTGGTGTATAGGTA-1 | GSM4626769 | OA |
| GSM4626769_AACTTTCAGAGCTATA-1 | GSM4626769 | OA |
| GSM4626769_AACTTTCAGCGATTCT-1 | GSM4626769 | OA |
| GSM4626769_AACTTTCAGGAGCGTT-1 | GSM4626769 | OA |
| GSM4626769_AACTTTCCAATTGCTG-1 | GSM4626769 | OA |
| GSM4626769_AACTTTCCACTTAACG-1 | GSM4626769 | OA |
| GSM4626769_AACTTTCCAGGTTAG-1  | GSM4626769 | OA |
| GSM4626769_AACTTTCTCAGAGACG-1 | GSM4626769 | OA |
| GSM4626769_AACTTTCTCCAAACAC-1 | GSM4626769 | OA |
| GSM4626769_AACTTTCTCGGATGGA-1 | GSM4626769 | OA |
| GSM4626769_AACTTTCTCGGTGTTA-1 | GSM4626769 | OA |

|                               |            |    |
|-------------------------------|------------|----|
| GSM4626769_AAGACCTCAGGTTTCA-1 | GSM4626769 | OA |
| GSM4626769_AAGACCTTCAAACAAG-1 | GSM4626769 | OA |
| GSM4626769_AAGACCTTACATACG-1  | GSM4626769 | OA |
| GSM4626769_AAGACCTTCTTGTTTG-1 | GSM4626769 | OA |
| GSM4626769_AAGCCGCAGCCGGTAA-1 | GSM4626769 | OA |
| GSM4626769_AAGCCGCCAGGGCATA-1 | GSM4626769 | OA |
| GSM4626769_AAGCCGCTCAACGCTA-1 | GSM4626769 | OA |
| GSM4626769_AAGCCGCTCAACGGGA-1 | GSM4626769 | OA |
| GSM4626769_AAGCCGCTCGCCAGCA-1 | GSM4626769 | OA |
| GSM4626769_AAGCCGCTCGTTTATC-1 | GSM4626769 | OA |
| GSM4626769_AAGGAGCAGCTGCGAA-1 | GSM4626769 | OA |
| GSM4626769_AAGGAGCGTACATCCA-1 | GSM4626769 | OA |
| GSM4626769_AAGGAGCGTACTTGAC-1 | GSM4626769 | OA |
| GSM4626769_AAGGAGCGTTTAGGAA-1 | GSM4626769 | OA |
| GSM4626769_AAGGAGCTCATCACCC-1 | GSM4626769 | OA |
| GSM4626769_AAGGAGCTCCTCAACC-1 | GSM4626769 | OA |
| GSM4626769_AAGGAGCTCCTCTAGC-1 | GSM4626769 | OA |
| GSM4626769_AAGGAGCTCTCTGCTG-1 | GSM4626769 | OA |
| GSM4626769_AAGGCAGCACGAAACG-1 | GSM4626769 | OA |
| GSM4626769_AAGGCAGCACGAAATA-1 | GSM4626769 | OA |
| GSM4626769_AAGGCAGCAGGGTATG-1 | GSM4626769 | OA |
| GSM4626769_AAGGCAGGTAGATTAG-1 | GSM4626769 | OA |
| GSM4626769_AAGGCAGGTAGGACAC-1 | GSM4626769 | OA |
| GSM4626769_AAGGCAGGTGCTGTAT-1 | GSM4626769 | OA |
| GSM4626769_AAGGCAGTCAAGCCTA-1 | GSM4626769 | OA |
| GSM4626769_AAGGCAGTCTCTGCTG-1 | GSM4626769 | OA |
| GSM4626769_AAGGTTCAGAAGGGTA-1 | GSM4626769 | OA |
| GSM4626769_AAGGTTCAGGATATAC-1 | GSM4626769 | OA |
| GSM4626769_AAGGTTCAGGGCACTA-1 | GSM4626769 | OA |
| GSM4626769_AAGGTTCGTTGTGGAG-1 | GSM4626769 | OA |
| GSM4626769_AAGGTTCTCTCTTATG-1 | GSM4626769 | OA |
| GSM4626769_AAGTCTGAGCAATATG-1 | GSM4626769 | OA |
| GSM4626769_AAGTCTGCAGCGAACA-1 | GSM4626769 | OA |
| GSM4626769_AAGTCTGGTTCCATGA-1 | GSM4626769 | OA |
| GSM4626769_AAGTCTGTGAGTCCCT-1 | GSM4626769 | OA |
| GSM4626769_AAGTCTGTCTGCAGTA-1 | GSM4626769 | OA |
| GSM4626769_AAGTCTGTCTTACCTA-1 | GSM4626769 | OA |
| GSM4626769_AATCCAGAGACCTTTG-1 | GSM4626769 | OA |
| GSM4626769_AATCCAGAGATGTGTA-1 | GSM4626769 | OA |
| GSM4626769_AATCCAGAGCGATGAC-1 | GSM4626769 | OA |
| GSM4626769_AATCCAGAGCTCCAG-1  | GSM4626769 | OA |
| GSM4626769_AATCCAGCATGGGACA-1 | GSM4626769 | OA |
| GSM4626769_AATCCAGTCAAAGTAG-1 | GSM4626769 | OA |
| GSM4626769_AATCGGTAGATAGCAT-1 | GSM4626769 | OA |
| GSM4626769_AATCGGTAGTGACATA-1 | GSM4626769 | OA |
| GSM4626769_AATCGGTCAATCAGAA-1 | GSM4626769 | OA |
| GSM4626769_AATCGGTCACGACGAA-1 | GSM4626769 | OA |
| GSM4626769_AATCGGTCAGGACGTA-1 | GSM4626769 | OA |
| GSM4626769_AATCGGTCATCGTCGG-1 | GSM4626769 | OA |
| GSM4626769_AATCGGTGTATCAGTC-1 | GSM4626769 | OA |
| GSM4626769_AATCGGTTCCGAAGAG-1 | GSM4626769 | OA |
| GSM4626769_ACACCAAAGCGGATCA-1 | GSM4626769 | OA |
| GSM4626769_ACACCAAAGGACATTA-1 | GSM4626769 | OA |
| GSM4626769_ACACCAAAGTTGTAGA-1 | GSM4626769 | OA |
| GSM4626769_ACACCAACAATCCGAT-1 | GSM4626769 | OA |
| GSM4626769_ACACCAACAGCTTCGG-1 | GSM4626769 | OA |
| GSM4626769_ACACCAAGTCGCATAT-1 | GSM4626769 | OA |

|                               |            |    |
|-------------------------------|------------|----|
| GSM4626769_ACACCAATCCGTTGTC-1 | GSM4626769 | OA |
| GSM4626769_ACACCAATCTGCCAGG-1 | GSM4626769 | OA |
| GSM4626769_ACACCCTAGAACTGTA-1 | GSM4626769 | OA |
| GSM4626769_ACACCCTAGACATAAC-1 | GSM4626769 | OA |
| GSM4626769_ACACCCTCAGTATCTG-1 | GSM4626769 | OA |
| GSM4626769_ACACCCTGTAGCACGA-1 | GSM4626769 | OA |
| GSM4626769_ACACCCTTCAGTTAGC-1 | GSM4626769 | OA |
| GSM4626769_ACACCCTTCTATGTT-1  | GSM4626769 | OA |
| GSM4626769_ACACCCTTCGGAAATA-1 | GSM4626769 | OA |
| GSM4626769_ACACCCGAGACAGGCT-1 | GSM4626769 | OA |
| GSM4626769_ACACCCGAGGATGGAA-1 | GSM4626769 | OA |
| GSM4626769_ACACCCGGTAAACACA-1 | GSM4626769 | OA |
| GSM4626769_ACACCCGGTGGTCTCG-1 | GSM4626769 | OA |
| GSM4626769_ACACCCGTCGCGATCG-1 | GSM4626769 | OA |
| GSM4626769_ACACTGAAGATAGCAT-1 | GSM4626769 | OA |
| GSM4626769_ACACTGAAGATATGGT-1 | GSM4626769 | OA |
| GSM4626769_ACACTGAAGCCAGTTT-1 | GSM4626769 | OA |
| GSM4626769_ACACTGAAGTTCCACA-1 | GSM4626769 | OA |
| GSM4626769_ACACTGAAGTTGTAGA-1 | GSM4626769 | OA |
| GSM4626769_ACACTGACAGCTGTAT-1 | GSM4626769 | OA |
| GSM4626769_ACACTGAGTTCTCATT-1 | GSM4626769 | OA |
| GSM4626769_ACACTGATCTTCCTTC-1 | GSM4626769 | OA |
| GSM4626769_ACAGCCGCACACCGAC-1 | GSM4626769 | OA |
| GSM4626769_ACAGCCGGTGGGTATG-1 | GSM4626769 | OA |
| GSM4626769_ACAGCCGGTGGTACAG-1 | GSM4626769 | OA |
| GSM4626769_ACAGCTAAGTGTGGCA-1 | GSM4626769 | OA |
| GSM4626769_ACAGCTACAACACGCC-1 | GSM4626769 | OA |
| GSM4626769_ACAGCTACATACTCTT-1 | GSM4626769 | OA |
| GSM4626769_ACAGCTAGTCAAGCGA-1 | GSM4626769 | OA |
| GSM4626769_ACAGCTAGTCCTCCAT-1 | GSM4626769 | OA |
| GSM4626769_ACAGCTAGTCTGATTG-1 | GSM4626769 | OA |
| GSM4626769_ACAGCTAGTTTACTCT-1 | GSM4626769 | OA |
| GSM4626769_ACAGCTATCCGGGTGT-1 | GSM4626769 | OA |
| GSM4626769_ACAGCTATCGCTTGTC-1 | GSM4626769 | OA |
| GSM4626769_ACAGCTATCGGATGGA-1 | GSM4626769 | OA |
| GSM4626769_ACAGCTATCTAACGGT-1 | GSM4626769 | OA |
| GSM4626769_ACATACGAGACTACAA-1 | GSM4626769 | OA |
| GSM4626769_ACATACGAGGGATGGG-1 | GSM4626769 | OA |
| GSM4626769_ACATACGAGTCAATAG-1 | GSM4626769 | OA |
| GSM4626769_ACATACGCAAACGTGG-1 | GSM4626769 | OA |
| GSM4626769_ACATACGCAGTTCCCT-1 | GSM4626769 | OA |
| GSM4626769_ACATACGTCCGGCACA-1 | GSM4626769 | OA |
| GSM4626769_ACATACGTCCGACTCT-1 | GSM4626769 | OA |
| GSM4626769_ACATCAGAGTTAACGA-1 | GSM4626769 | OA |
| GSM4626769_ACATCAGCAAGACGTG-1 | GSM4626769 | OA |
| GSM4626769_ACATCAGCACTCTGTC-1 | GSM4626769 | OA |
| GSM4626769_ACATCAGGTTCCAACA-1 | GSM4626769 | OA |
| GSM4626769_ACATCAGTCATAGCAC-1 | GSM4626769 | OA |
| GSM4626769_ACATGGTCAAAGTCAA-1 | GSM4626769 | OA |
| GSM4626769_ACATGGTCAACGATGG-1 | GSM4626769 | OA |
| GSM4626769_ACATGGTCAGATGAGC-1 | GSM4626769 | OA |
| GSM4626769_ACATGGTCAGTATGCT-1 | GSM4626769 | OA |
| GSM4626769_ACATGGTGTTGCGCAC-1 | GSM4626769 | OA |
| GSM4626769_ACATGGTTCTAGCACA-1 | GSM4626769 | OA |
| GSM4626769_ACCAGTAAGATGTTAG-1 | GSM4626769 | OA |
| GSM4626769_ACCAGTAAGCCACGTC-1 | GSM4626769 | OA |
| GSM4626769_ACCAGTAAGCCCAACC-1 | GSM4626769 | OA |

|                                |            |    |
|--------------------------------|------------|----|
| GSM4626769_ACCAGTAAGCCGCCTA-1  | GSM4626769 | OA |
| GSM4626769_ACCAGTAAGTTACCCA-1  | GSM4626769 | OA |
| GSM4626769_ACCCACTCAAGCCTAT-1  | GSM4626769 | OA |
| GSM4626769_ACCCACTCACCATCCT-1  | GSM4626769 | OA |
| GSM4626769_ACCCACTTCATGTAGC-1  | GSM4626769 | OA |
| GSM4626769_ACCGTAAAGCCGCCTA-1  | GSM4626769 | OA |
| GSM4626769_ACCGTAAAGCTAGTCT-1  | GSM4626769 | OA |
| GSM4626769_ACCGTAAAGGCGCTCT-1  | GSM4626769 | OA |
| GSM4626769_ACCGTAAAGTGTGGCA-1  | GSM4626769 | OA |
| GSM4626769_ACCGTAAGTAGCCTCG-1  | GSM4626769 | OA |
| GSM4626769_ACCGTAAGTCCAAGTT-1  | GSM4626769 | OA |
| GSM4626769_ACCGTAATCCCATTTA-1  | GSM4626769 | OA |
| GSM4626769_ACCGTAATCCCGGATG-1  | GSM4626769 | OA |
| GSM4626769_ACCGTAATCGAATCCA-1  | GSM4626769 | OA |
| GSM4626769_ACCTTTAAGAGTAATC-1  | GSM4626769 | OA |
| GSM4626769_ACCTTTAAGCCAGGAT-1  | GSM4626769 | OA |
| GSM4626769_ACCTTTAAGTTGAGTA-1  | GSM4626769 | OA |
| GSM4626769_ACCTTTACACGGCTAC-1  | GSM4626769 | OA |
| GSM4626769_ACCTTTACAGCTTAAC-1  | GSM4626769 | OA |
| GSM4626769_ACCTTTAGTAAATGAC-1  | GSM4626769 | OA |
| GSM4626769_ACCTTTATCTCTAAGG-1  | GSM4626769 | OA |
| GSM4626769_ACGAGCCAGCGAGAAA-1  | GSM4626769 | OA |
| GSM4626769_ACGAGCCAGGTGTTAA-1  | GSM4626769 | OA |
| GSM4626769_ACGAGCCCACACCGCA-1  | GSM4626769 | OA |
| GSM4626769_ACGAGCCCACACGCTG-1  | GSM4626769 | OA |
| GSM4626769_ACGAGCCCATACGCTA-1  | GSM4626769 | OA |
| GSM4626769_ACGAGCCGTAGGGTAC-1  | GSM4626769 | OA |
| GSM4626769_ACGAGCCGTCTTCGTC-1  | GSM4626769 | OA |
| GSM4626769_ACGAGCCTCAGTCAGT-1  | GSM4626769 | OA |
| GSM4626769_ACGAGCCTCTAACTCT-1  | GSM4626769 | OA |
| GSM4626769_ACGAGGAAGAAGGACA-1  | GSM4626769 | OA |
| GSM4626769_ACGAGGAAGCCCTAAT-1  | GSM4626769 | OA |
| GSM4626769_ACGAGGACAAACAACA-1  | GSM4626769 | OA |
| GSM4626769_ACGAGGAGTGACTACT-1  | GSM4626769 | OA |
| GSM4626769_ACGAGGATCTGTCCGT-1  | GSM4626769 | OA |
| GSM4626769_ACGATACAGAGTAAGG-1  | GSM4626769 | OA |
| GSM4626769_ACGATACCACCCATGG-1  | GSM4626769 | OA |
| GSM4626769_ACGATACGTGCCCTGGT-1 | GSM4626769 | OA |
| GSM4626769_ACGATACGTGGGTATG-1  | GSM4626769 | OA |
| GSM4626769_ACGATACTCGAGAACG-1  | GSM4626769 | OA |
| GSM4626769_ACGATACTCTGTTGAG-1  | GSM4626769 | OA |
| GSM4626769_ACGATACTCTTCAACT-1  | GSM4626769 | OA |
| GSM4626769_ACGATGTCATATGAGA-1  | GSM4626769 | OA |
| GSM4626769_ACGATGTGTAGCAAAT-1  | GSM4626769 | OA |
| GSM4626769_ACGATGTGTAGCTGCC-1  | GSM4626769 | OA |
| GSM4626769_ACGATGTTCTCGTTTA-1  | GSM4626769 | OA |
| GSM4626769_ACGCAGCGTACCATCA-1  | GSM4626769 | OA |
| GSM4626769_ACGCAGCGTGTGAATA-1  | GSM4626769 | OA |
| GSM4626769_ACGCAGCTCCAATGGT-1  | GSM4626769 | OA |
| GSM4626769_ACGCAGCTCCGCAGTG-1  | GSM4626769 | OA |
| GSM4626769_ACGCAGCTCTCTTATG-1  | GSM4626769 | OA |
| GSM4626769_ACGCCAGAGTCATCCA-1  | GSM4626769 | OA |
| GSM4626769_ACGCCAGCACCAGGCT-1  | GSM4626769 | OA |
| GSM4626769_ACGCCAGCACCGAATT-1  | GSM4626769 | OA |
| GSM4626769_ACGCCAGCACGAAACG-1  | GSM4626769 | OA |
| GSM4626769_ACGCCAGCAGCGTAAG-1  | GSM4626769 | OA |
| GSM4626769_ACGCCAGCAGCTCGAC-1  | GSM4626769 | OA |



|                                |            |    |
|--------------------------------|------------|----|
| GSM4626769_ACGCCAGCATATACGC-1  | GSM4626769 | OA |
| GSM4626769_ACGCCAGTCCGTTGCT-1  | GSM4626769 | OA |
| GSM4626769_ACGCCGACACAGGCCT-1  | GSM4626769 | OA |
| GSM4626769_ACGCCGAGTCCGAACC-1  | GSM4626769 | OA |
| GSM4626769_ACGCCGATCCATGCTC-1  | GSM4626769 | OA |
| GSM4626769_ACGCCGATCCCTTGTG-1  | GSM4626769 | OA |
| GSM4626769_ACGCCGATCCTAGGGC-1  | GSM4626769 | OA |
| GSM4626769_ACGGAGATCTTGTATC-1  | GSM4626769 | OA |
| GSM4626769_ACGGCCAAGTCGAGTG-1  | GSM4626769 | OA |
| GSM4626769_ACGGCCACATCGGGTC-1  | GSM4626769 | OA |
| GSM4626769_ACGGCCATCAAGGCTT-1  | GSM4626769 | OA |
| GSM4626769_ACGGCCATCAGCTCTC-1  | GSM4626769 | OA |
| GSM4626769_ACGGCCATCATGTCCC-1  | GSM4626769 | OA |
| GSM4626769_ACGGCCATCCACGACG-1  | GSM4626769 | OA |
| GSM4626769_ACGGCCATCTCAACTT-1  | GSM4626769 | OA |
| GSM4626769_ACGGGCTGTACGAAAT-1  | GSM4626769 | OA |
| GSM4626769_ACGGGCTGTAGGAGTC-1  | GSM4626769 | OA |
| GSM4626769_ACGGGCTGTCTAGCGC-1  | GSM4626769 | OA |
| GSM4626769_ACGGGCTTCCCTCAGT-1  | GSM4626769 | OA |
| GSM4626769_ACGGGCTTCCCTCTTT-1  | GSM4626769 | OA |
| GSM4626769_ACGGGCTTCTTGTTTG-1  | GSM4626769 | OA |
| GSM4626769_ACGGGTCCAGCCTTGG-1  | GSM4626769 | OA |
| GSM4626769_ACGGGTCCAGGAATCG-1  | GSM4626769 | OA |
| GSM4626769_ACGGGTCGTAGAAGGA-1  | GSM4626769 | OA |
| GSM4626769_ACGGGTCGTTGCGCAC-1  | GSM4626769 | OA |
| GSM4626769_ACGGGTCTCCAAGTAC-1  | GSM4626769 | OA |
| GSM4626769_ACGGGTCTCCAAGAT-1   | GSM4626769 | OA |
| GSM4626769_ACGGGTCTCCTTTCTC-1  | GSM4626769 | OA |
| GSM4626769_ACGGGTCTCGCATGAT-1  | GSM4626769 | OA |
| GSM4626769_ACGGGTCTCGTATCAG-1  | GSM4626769 | OA |
| GSM4626769_ACGTCAACAACAGCC-1   | GSM4626769 | OA |
| GSM4626769_ACGTCAAGTACTCAAC-1  | GSM4626769 | OA |
| GSM4626769_ACGTCAAGTTGTCTTT-1  | GSM4626769 | OA |
| GSM4626769_ACGTCAATCTCTAAGG-1  | GSM4626769 | OA |
| GSM4626769_ACTATCTAGGCCCTCA-1  | GSM4626769 | OA |
| GSM4626769_ACTATCTGTGCGGTT-1   | GSM4626769 | OA |
| GSM4626769_ACTATCTGTCTTGC GG-1 | GSM4626769 | OA |
| GSM4626769_ACTATCTGTGTATGGG-1  | GSM4626769 | OA |
| GSM4626769_ACTATCTTCCTAGAAC-1  | GSM4626769 | OA |
| GSM4626769_ACTATCTTCAATCCA-1   | GSM4626769 | OA |
| GSM4626769_ACTGAACAGGCATGGT-1  | GSM4626769 | OA |
| GSM4626769_ACTGAACAGGTAAACT-1  | GSM4626769 | OA |
| GSM4626769_ACTGAACCAATGGTCT-1  | GSM4626769 | OA |
| GSM4626769_ACTGAACCAACGTT-1    | GSM4626769 | OA |
| GSM4626769_ACTGAACGTAGGCATG-1  | GSM4626769 | OA |
| GSM4626769_ACTGAACGTAGTAGTA-1  | GSM4626769 | OA |
| GSM4626769_ACTGAACGTCACACGC-1  | GSM4626769 | OA |
| GSM4626769_ACTGAGTAGACACTAA-1  | GSM4626769 | OA |
| GSM4626769_ACTGAGTAGCGATAGC-1  | GSM4626769 | OA |
| GSM4626769_ACTGAGTCATTACCTT-1  | GSM4626769 | OA |
| GSM4626769_ACTGAGTCATTCTTAC-1  | GSM4626769 | OA |
| GSM4626769_ACTGAGTTCTCGAGTA-1  | GSM4626769 | OA |
| GSM4626769_ACTGATGAGTGGAGTC-1  | GSM4626769 | OA |
| GSM4626769_ACTGATGAGTTAGCGG-1  | GSM4626769 | OA |
| GSM4626769_ACTGATGCAAGAGTCG-1  | GSM4626769 | OA |
| GSM4626769_ACTGATGCACCCATTC-1  | GSM4626769 | OA |
| GSM4626769_ACTGATGGTAAGGGAA-1  | GSM4626769 | OA |

|                               |            |    |
|-------------------------------|------------|----|
| GSM4626769_ACTGATGGTTTACTCT-1 | GSM4626769 | OA |
| GSM4626769_ACTGATGTCGGCATCG-1 | GSM4626769 | OA |
| GSM4626769_ACTGCTCCACGTCTCT-1 | GSM4626769 | OA |
| GSM4626769_ACTGCTCCATGGATGG-1 | GSM4626769 | OA |
| GSM4626769_ACTGCTCCATTACGAC-1 | GSM4626769 | OA |
| GSM4626769_ACTGTCCAGAAGAAGC-1 | GSM4626769 | OA |
| GSM4626769_ACTGTCCAGCCATCGC-1 | GSM4626769 | OA |
| GSM4626769_ACTGTCCCAAGAAGAG-1 | GSM4626769 | OA |
| GSM4626769_ACTGTCCCACCATGTA-1 | GSM4626769 | OA |
| GSM4626769_ACTGTCCCATGTAAGA-1 | GSM4626769 | OA |
| GSM4626769_ACTGTCCGTCAATGTC-1 | GSM4626769 | OA |
| GSM4626769_ACTGTCCGTCCGATCC-1 | GSM4626769 | OA |
| GSM4626769_ACTGTCCGTGTATGGG-1 | GSM4626769 | OA |
| GSM4626769_ACTGTCCGTTTGGCGC-1 | GSM4626769 | OA |
| GSM4626769_ACTTACTAGCTCAACT-1 | GSM4626769 | OA |
| GSM4626769_ACTTACTCAATAACGA-1 | GSM4626769 | OA |
| GSM4626769_ACTTACTCACTTCTGC-1 | GSM4626769 | OA |
| GSM4626769_ACTTACTCAGTATCTG-1 | GSM4626769 | OA |
| GSM4626769_ACTTACTCATCGATTG-1 | GSM4626769 | OA |
| GSM4626769_ACTTACTGTAGCACGA-1 | GSM4626769 | OA |
| GSM4626769_ACTTACTGTATAATGG-1 | GSM4626769 | OA |
| GSM4626769_ACTTACTGTTAAGAAC-1 | GSM4626769 | OA |
| GSM4626769_ACTTACTTCAGAAATG-1 | GSM4626769 | OA |
| GSM4626769_ACTTACTTCCATGAAC-1 | GSM4626769 | OA |
| GSM4626769_ACTTACTTCTTGACGA-1 | GSM4626769 | OA |
| GSM4626769_ACTTGTTAGCCTCGTG-1 | GSM4626769 | OA |
| GSM4626769_ACTTGTTAGGGATCTG-1 | GSM4626769 | OA |
| GSM4626769_ACTTGTTAGTGGAGTC-1 | GSM4626769 | OA |
| GSM4626769_ACTTGTTACACGCTG-1  | GSM4626769 | OA |
| GSM4626769_ACTTGTTATCACAAAC-1 | GSM4626769 | OA |
| GSM4626769_ACTTGTTATGGGACA-1  | GSM4626769 | OA |
| GSM4626769_ACTTGTTGTTCCGGCT-1 | GSM4626769 | OA |
| GSM4626769_ACTTGTTTCCGAAGAG-1 | GSM4626769 | OA |
| GSM4626769_ACTTGTTTCTTGTTTG-1 | GSM4626769 | OA |
| GSM4626769_ACTTTCAAGAGCTATA-1 | GSM4626769 | OA |
| GSM4626769_ACTTTCAAGTTACGGG-1 | GSM4626769 | OA |
| GSM4626769_ACTTTCACACTGTCGG-1 | GSM4626769 | OA |
| GSM4626769_ACTTTCACAGATCCAT-1 | GSM4626769 | OA |
| GSM4626769_ACTTTCAGTGAGTATA-1 | GSM4626769 | OA |
| GSM4626769_ACTTTCAGTGTGTGCC-1 | GSM4626769 | OA |
| GSM4626769_ACTTTCATCCGTCAA-1  | GSM4626769 | OA |
| GSM4626769_ACTTTCATCGGTCCGA-1 | GSM4626769 | OA |
| GSM4626769_ACTTTCATCTACTCAT-1 | GSM4626769 | OA |
| GSM4626769_AGAATAGAGATCGGGT-1 | GSM4626769 | OA |
| GSM4626769_AGAATAGGTACGACCC-1 | GSM4626769 | OA |
| GSM4626769_AGAATAGGTCCCGACA-1 | GSM4626769 | OA |
| GSM4626769_AGAATAGGTCTGCAAT-1 | GSM4626769 | OA |
| GSM4626769_AGAATAGTCACTTACT-1 | GSM4626769 | OA |
| GSM4626769_AGAATAGTCCTCATT-1  | GSM4626769 | OA |
| GSM4626769_AGACGTTCAAGCCTAT-1 | GSM4626769 | OA |
| GSM4626769_AGACGTTGTCAGTGGA-1 | GSM4626769 | OA |
| GSM4626769_AGACGTTTCTGACCTC-1 | GSM4626769 | OA |
| GSM4626769_AGACGTTTCTGTCTAT-1 | GSM4626769 | OA |
| GSM4626769_AGAGCGAAGCTAGGCA-1 | GSM4626769 | OA |
| GSM4626769_AGAGCGACACCTGGTG-1 | GSM4626769 | OA |
| GSM4626769_AGAGCGACATAAAGGT-1 | GSM4626769 | OA |
| GSM4626769_AGAGCGATCCCAGGTG-1 | GSM4626769 | OA |

|                                |            |    |
|--------------------------------|------------|----|
| GSM4626769_AGAGCGATCTATCGCC-1  | GSM4626769 | OA |
| GSM4626769_AGAGCTTAGATTACCC-1  | GSM4626769 | OA |
| GSM4626769_AGAGCTTAGTCCATAC-1  | GSM4626769 | OA |
| GSM4626769_AGAGCTTCACCAGTTA-1  | GSM4626769 | OA |
| GSM4626769_AGAGCTTGTAAGGGAA-1  | GSM4626769 | OA |
| GSM4626769_AGAGCTTGTCGGCATC-1  | GSM4626769 | OA |
| GSM4626769_AGAGCTTGTTGCTCCT-1  | GSM4626769 | OA |
| GSM4626769_AGAGCTTTCAGAAATG-1  | GSM4626769 | OA |
| GSM4626769_AGAGCTTTCAGCCTAA-1  | GSM4626769 | OA |
| GSM4626769_AGAGCTTTCGGGAGTA-1  | GSM4626769 | OA |
| GSM4626769_AGAGTGGTCCCTCAACC-1 | GSM4626769 | OA |
| GSM4626769_AGAGTGGTCTCTTATG-1  | GSM4626769 | OA |
| GSM4626769_AGATCTGAGCCCGAAA-1  | GSM4626769 | OA |
| GSM4626769_AGATCTGAGCCTTGAT-1  | GSM4626769 | OA |
| GSM4626769_AGATCTGCAGTCCTTC-1  | GSM4626769 | OA |
| GSM4626769_AGATCTGCAGTCGATT-1  | GSM4626769 | OA |
| GSM4626769_AGATCTGGTACCTACA-1  | GSM4626769 | OA |
| GSM4626769_AGATCTGGTAGCTTGT-1  | GSM4626769 | OA |
| GSM4626769_AGATCTGGTAGGGACT-1  | GSM4626769 | OA |
| GSM4626769_AGATCTGGTATCGCAT-1  | GSM4626769 | OA |
| GSM4626769_AGATCTGTTCGATCCCT-1 | GSM4626769 | OA |
| GSM4626769_AGATCTGTTCGGACAAG-1 | GSM4626769 | OA |
| GSM4626769_AGATTGCAGCCACGTC-1  | GSM4626769 | OA |
| GSM4626769_AGATTGCAGCGTGAAC-1  | GSM4626769 | OA |
| GSM4626769_AGATTGCCAGCGTAAG-1  | GSM4626769 | OA |
| GSM4626769_AGATTGCGTACTTCTT-1  | GSM4626769 | OA |
| GSM4626769_AGATTGCGTAGGCATG-1  | GSM4626769 | OA |
| GSM4626769_AGATTGCGTCGGCATC-1  | GSM4626769 | OA |
| GSM4626769_AGATTGCGTGTTTGTG-1  | GSM4626769 | OA |
| GSM4626769_AGATTGCTCAACCATG-1  | GSM4626769 | OA |
| GSM4626769_AGATTGCTCACTTATC-1  | GSM4626769 | OA |
| GSM4626769_AGATTGCTCCGTACAA-1  | GSM4626769 | OA |
| GSM4626769_AGATTGCTCGGCCGAT-1  | GSM4626769 | OA |
| GSM4626769_AGCAGCCAGTAGGTGC-1  | GSM4626769 | OA |
| GSM4626769_AGCAGCCCATCCTTGC-1  | GSM4626769 | OA |
| GSM4626769_AGCAGCCGTTACGACT-1  | GSM4626769 | OA |
| GSM4626769_AGCAGCCGTTTCGCGAC-1 | GSM4626769 | OA |
| GSM4626769_AGCAGCCTCATACGGT-1  | GSM4626769 | OA |
| GSM4626769_AGCATACAGACGCAAC-1  | GSM4626769 | OA |
| GSM4626769_AGCATACAGATCCTGT-1  | GSM4626769 | OA |
| GSM4626769_AGCATACAGGATATAC-1  | GSM4626769 | OA |
| GSM4626769_AGCATACAGTGAACGC-1  | GSM4626769 | OA |
| GSM4626769_AGCATACCACCAGCAC-1  | GSM4626769 | OA |
| GSM4626769_AGCATACGTAGGCTGA-1  | GSM4626769 | OA |
| GSM4626769_AGCATACGTTGCGCAC-1  | GSM4626769 | OA |
| GSM4626769_AGCATACTCTGCCAGG-1  | GSM4626769 | OA |
| GSM4626769_AGCATACTCTTGTTTG-1  | GSM4626769 | OA |
| GSM4626769_AGCCTAAAGCTAAACA-1  | GSM4626769 | OA |
| GSM4626769_AGCCTAACAGATCCAT-1  | GSM4626769 | OA |
| GSM4626769_AGCCTAAGTACGACCC-1  | GSM4626769 | OA |
| GSM4626769_AGCCTAAGTATCTGCA-1  | GSM4626769 | OA |
| GSM4626769_AGCCTAATCACTATTC-1  | GSM4626769 | OA |
| GSM4626769_AGCGGTTCAGGCCCGTT-1 | GSM4626769 | OA |
| GSM4626769_AGCGGTTCAGTACATGA-1 | GSM4626769 | OA |
| GSM4626769_AGCGGTCTCTTTAGTC-1  | GSM4626769 | OA |
| GSM4626769_AGCGTATAGCGTCAAG-1  | GSM4626769 | OA |
| GSM4626769_AGCGTATAGTCGATAA-1  | GSM4626769 | OA |

|                               |            |    |
|-------------------------------|------------|----|
| GSM4626769_AGCGTATCAGCTATTG-1 | GSM4626769 | OA |
| GSM4626769_AGCGTCGCACGTAAGG-1 | GSM4626769 | OA |
| GSM4626769_AGCGTCGCATTGGTAC-1 | GSM4626769 | OA |
| GSM4626769_AGCGTCGGTAGCTCCG-1 | GSM4626769 | OA |
| GSM4626769_AGCGTCGTCTTTCCTC-1 | GSM4626769 | OA |
| GSM4626769_AGCTCCTCACGACGAA-1 | GSM4626769 | OA |
| GSM4626769_AGCTCCTCAGCCTGTG-1 | GSM4626769 | OA |
| GSM4626769_AGCTCCTCATTCTCAT-1 | GSM4626769 | OA |
| GSM4626769_AGCTCCTGTAAGTAGT-1 | GSM4626769 | OA |
| GSM4626769_AGCTCCTGTAGCGTAG-1 | GSM4626769 | OA |
| GSM4626769_AGCTCCTGTCTAGCCG-1 | GSM4626769 | OA |
| GSM4626769_AGCTCCTGTTGATTGC-1 | GSM4626769 | OA |
| GSM4626769_AGCTCTCAGTAAGTAC-1 | GSM4626769 | OA |
| GSM4626769_AGCTCTCCAGCGTCCA-1 | GSM4626769 | OA |
| GSM4626769_AGCTCTCGTGACCAAG-1 | GSM4626769 | OA |
| GSM4626769_AGCTCTCCTAGGGC-1   | GSM4626769 | OA |
| GSM4626769_AGCTCTCCTTCAAT-1   | GSM4626769 | OA |
| GSM4626769_AGCTTGAAGAAACGAG-1 | GSM4626769 | OA |
| GSM4626769_AGCTTGAAGACAGGCT-1 | GSM4626769 | OA |
| GSM4626769_AGCTTGAGTGTGCTG-1  | GSM4626769 | OA |
| GSM4626769_AGCTTGATCACATGCA-1 | GSM4626769 | OA |
| GSM4626769_AGCTTGATCTAACTGG-1 | GSM4626769 | OA |
| GSM4626769_AGGCCACAGACTGGGT-1 | GSM4626769 | OA |
| GSM4626769_AGGCCACAGAGACGAA-1 | GSM4626769 | OA |
| GSM4626769_AGGCCACAGGCTCATT-1 | GSM4626769 | OA |
| GSM4626769_AGGCCACTCAACCAAC-1 | GSM4626769 | OA |
| GSM4626769_AGGCCACTCCGCATCT-1 | GSM4626769 | OA |
| GSM4626769_AGGCCACTCCTCCTAG-1 | GSM4626769 | OA |
| GSM4626769_AGGCCACTCTGCTTGC-1 | GSM4626769 | OA |
| GSM4626769_AGGCCGTAGAGCCCAA-1 | GSM4626769 | OA |
| GSM4626769_AGGCCGTAGGCGTACA-1 | GSM4626769 | OA |
| GSM4626769_AGGCCGTCAAAGCGT-1  | GSM4626769 | OA |
| GSM4626769_AGGCCGTCAAATCCGT-1 | GSM4626769 | OA |
| GSM4626769_AGGCCGTGTTCCACTC-1 | GSM4626769 | OA |
| GSM4626769_AGGCCGTTCAGCGATT-1 | GSM4626769 | OA |
| GSM4626769_AGGGAGTAGGGATGGG-1 | GSM4626769 | OA |
| GSM4626769_AGGGAGTGTAAGCACG-1 | GSM4626769 | OA |
| GSM4626769_AGGGAGTGCTCCCTA-1  | GSM4626769 | OA |
| GSM4626769_AGGGAGTTCGAATCCA-1 | GSM4626769 | OA |
| GSM4626769_AGGGATGAGTGACGT-1  | GSM4626769 | OA |
| GSM4626769_AGGGATGCAAACAACA-1 | GSM4626769 | OA |
| GSM4626769_AGGGATGCAAGCGTAG-1 | GSM4626769 | OA |
| GSM4626769_AGGGATGTCATGCTCC-1 | GSM4626769 | OA |
| GSM4626769_AGGGATGTCTCCGGTT-1 | GSM4626769 | OA |
| GSM4626769_AGGGTGAAGCGATCCC-1 | GSM4626769 | OA |
| GSM4626769_AGGGTGAAGTCCCACG-1 | GSM4626769 | OA |
| GSM4626769_AGGGTGACAAGCTGTT-1 | GSM4626769 | OA |
| GSM4626769_AGGGTGATCTACGAGT-1 | GSM4626769 | OA |
| GSM4626769_AGGTCATCACTAAGTC-1 | GSM4626769 | OA |
| GSM4626769_AGGTCATGTACCGTTA-1 | GSM4626769 | OA |
| GSM4626769_AGGTCATTTCGTTGCC-1 | GSM4626769 | OA |
| GSM4626769_AGGTCATTCTCAAGTG-1 | GSM4626769 | OA |
| GSM4626769_AGGTCCGCACGACAA-1  | GSM4626769 | OA |
| GSM4626769_AGGTCCGCATCATCCC-1 | GSM4626769 | OA |
| GSM4626769_AGGTCCGCATGGTTGT-1 | GSM4626769 | OA |
| GSM4626769_AGGTCCGGTATGAATG-1 | GSM4626769 | OA |
| GSM4626769_AGGTCCGGTCAACTGT-1 | GSM4626769 | OA |

|                                |            |    |
|--------------------------------|------------|----|
| GSM4626769_AGGTCCGGTTAGGGTG-1  | GSM4626769 | OA |
| GSM4626769_AGGTCCGTCACCCTCA-1  | GSM4626769 | OA |
| GSM4626769_AGGTCCGTCAGTACGT-1  | GSM4626769 | OA |
| GSM4626769_AGGTCCGTCTCTAAGG-1  | GSM4626769 | OA |
| GSM4626769_AGTAGTCAGACGCACA-1  | GSM4626769 | OA |
| GSM4626769_AGTAGTCCACATTCGA-1  | GSM4626769 | OA |
| GSM4626769_AGTAGTCGTTAAGATG-1  | GSM4626769 | OA |
| GSM4626769_AGTAGTCTCGGTGTCTG-1 | GSM4626769 | OA |
| GSM4626769_AGTCTTTTCAGCTGCTG-1 | GSM4626769 | OA |
| GSM4626769_AGTCTTTGTCTCCCTA-1  | GSM4626769 | OA |
| GSM4626769_AGTCTTTGTGTTGGGA-1  | GSM4626769 | OA |
| GSM4626769_AGTCTTTTCAGGTA-1    | GSM4626769 | OA |
| GSM4626769_AGTGAGGAGCTCCTTC-1  | GSM4626769 | OA |
| GSM4626769_AGTGAGGAGTCACGCC-1  | GSM4626769 | OA |
| GSM4626769_AGTGAGGCACTCTGTC-1  | GSM4626769 | OA |
| GSM4626769_AGTGAGGCAGACGCCT-1  | GSM4626769 | OA |
| GSM4626769_AGTGAGGGTACGAAAT-1  | GSM4626769 | OA |
| GSM4626769_AGTGAGGGTCCAGTGC-1  | GSM4626769 | OA |
| GSM4626769_AGTGAGGGTTTCGCTC-1  | GSM4626769 | OA |
| GSM4626769_AGTGAGGTCAGTCCCT-1  | GSM4626769 | OA |
| GSM4626769_AGTGAGGTCCCACTTG-1  | GSM4626769 | OA |
| GSM4626769_AGTGGGAAGACCTTTG-1  | GSM4626769 | OA |
| GSM4626769_AGTGGGAAGCGTGAAC-1  | GSM4626769 | OA |
| GSM4626769_AGTGGGACATCACGAT-1  | GSM4626769 | OA |
| GSM4626769_AGTGGGAGTTCCTCCA-1  | GSM4626769 | OA |
| GSM4626769_AGTGTCAAGAGTACCG-1  | GSM4626769 | OA |
| GSM4626769_AGTGTCAAGGGATCTG-1  | GSM4626769 | OA |
| GSM4626769_AGTGTCACAAATACAG-1  | GSM4626769 | OA |
| GSM4626769_AGTGTCACAACCTGGCC-1 | GSM4626769 | OA |
| GSM4626769_AGTGTCACACGCATCG-1  | GSM4626769 | OA |
| GSM4626769_AGTGTCAGTAGCGTGA-1  | GSM4626769 | OA |
| GSM4626769_AGTGTCAGTCTCACCT-1  | GSM4626769 | OA |
| GSM4626769_AGTGTCAGTTTAGGAA-1  | GSM4626769 | OA |
| GSM4626769_AGTGTCATCAATACCG-1  | GSM4626769 | OA |
| GSM4626769_AGTGTCATCACTTATC-1  | GSM4626769 | OA |
| GSM4626769_AGTGTCATCGTTACGA-1  | GSM4626769 | OA |
| GSM4626769_AGTTGGTAGTACGATA-1  | GSM4626769 | OA |
| GSM4626769_AGTTGGTAGTGCCACA-1  | GSM4626769 | OA |
| GSM4626769_AGTTGGTCAGCTGGCT-1  | GSM4626769 | OA |
| GSM4626769_ATAACGCGTAACGTTTC-1 | GSM4626769 | OA |
| GSM4626769_ATAACGCGTACCGAGA-1  | GSM4626769 | OA |
| GSM4626769_ATAACGCGTAGTAGTA-1  | GSM4626769 | OA |
| GSM4626769_ATAACGCTCAGGCCCA-1  | GSM4626769 | OA |
| GSM4626769_ATAACGCTCCTGCTTG-1  | GSM4626769 | OA |
| GSM4626769_ATAAGAGAGA-1        | GSM4626769 | OA |
| GSM4626769_ATAAGAGAGAAATGTTG-1 | GSM4626769 | OA |
| GSM4626769_ATAAGAGCAGTAAGCG-1  | GSM4626769 | OA |
| GSM4626769_ATAAGAGGTAGGCTGA-1  | GSM4626769 | OA |
| GSM4626769_ATAAGAGGTCTAGTCA-1  | GSM4626769 | OA |
| GSM4626769_ATAAGAGTCCCTCAGT-1  | GSM4626769 | OA |
| GSM4626769_ATAAGAGTCGAACTGT-1  | GSM4626769 | OA |
| GSM4626769_ATAGACCAGACTCGGA-1  | GSM4626769 | OA |
| GSM4626769_ATAGACCAGCCCAGCT-1  | GSM4626769 | OA |
| GSM4626769_ATAGACCAGCGTCAAG-1  | GSM4626769 | OA |
| GSM4626769_ATAGACCAGGCCGAAT-1  | GSM4626769 | OA |
| GSM4626769_ATAGACCCAAGCGATG-1  | GSM4626769 | OA |

|                               |            |    |
|-------------------------------|------------|----|
| GSM4626769_ATAGACCCACCGATAT-1 | GSM4626769 | OA |
| GSM4626769_ATAGACCGTCTCACCT-1 | GSM4626769 | OA |
| GSM4626769_ATAGACCTCCACGCAG-1 | GSM4626769 | OA |
| GSM4626769_ATAGACCTCTTAACCT-1 | GSM4626769 | OA |
| GSM4626769_ATCACGAAGGATGGAA-1 | GSM4626769 | OA |
| GSM4626769_ATCACGACAAATACAG-1 | GSM4626769 | OA |
| GSM4626769_ATCACGACAATGAATG-1 | GSM4626769 | OA |
| GSM4626769_ATCACGAGTAGCGCTC-1 | GSM4626769 | OA |
| GSM4626769_ATCACGAGTCCAATA-1  | GSM4626769 | OA |
| GSM4626769_ATCACGAGTCTGATTG-1 | GSM4626769 | OA |
| GSM4626769_ATCACGAGTGAGTGAC-1 | GSM4626769 | OA |
| GSM4626769_ATCATCTAGAATGTGT-1 | GSM4626769 | OA |
| GSM4626769_ATCATCTAGTTGCAGG-1 | GSM4626769 | OA |
| GSM4626769_ATCATCTCATATGCTG-1 | GSM4626769 | OA |
| GSM4626769_ATCATCTCATGGGAAC-1 | GSM4626769 | OA |
| GSM4626769_ATCATCTGTGCGGTAA-1 | GSM4626769 | OA |
| GSM4626769_ATCATCTGTTGGTAAA-1 | GSM4626769 | OA |
| GSM4626769_ATCATCTGTTTGTGTG-1 | GSM4626769 | OA |
| GSM4626769_ATCATGGCACACCGAC-1 | GSM4626769 | OA |
| GSM4626769_ATCATGGCACATGGGA-1 | GSM4626769 | OA |
| GSM4626769_ATCATGGCATAGTAAG-1 | GSM4626769 | OA |
| GSM4626769_ATCATGGGTCAATGTC-1 | GSM4626769 | OA |
| GSM4626769_ATCATGGGTTCCGTCT-1 | GSM4626769 | OA |
| GSM4626769_ATCATGGTCACTGGGC-1 | GSM4626769 | OA |
| GSM4626769_ATCATGGTCTACTTAC-1 | GSM4626769 | OA |
| GSM4626769_ATCCACCCACGACGAA-1 | GSM4626769 | OA |
| GSM4626769_ATCCACCGTGAGGGAG-1 | GSM4626769 | OA |
| GSM4626769_ATCCACCGTTTGCATG-1 | GSM4626769 | OA |
| GSM4626769_ATCCGAAAGGCATGGT-1 | GSM4626769 | OA |
| GSM4626769_ATCCGAACACGCATCG-1 | GSM4626769 | OA |
| GSM4626769_ATCCGAACAGTACACT-1 | GSM4626769 | OA |
| GSM4626769_ATCCGAAGTATCACCA-1 | GSM4626769 | OA |
| GSM4626769_ATCCGAAGTCCAGTGC-1 | GSM4626769 | OA |
| GSM4626769_ATCCGAATCGCATGAT-1 | GSM4626769 | OA |
| GSM4626769_ATCGAGTCACATCCGG-1 | GSM4626769 | OA |
| GSM4626769_ATCGAGTCACGCATCG-1 | GSM4626769 | OA |
| GSM4626769_ATCGAGTCAGCTATTG-1 | GSM4626769 | OA |
| GSM4626769_ATCGAGTCATGGAATA-1 | GSM4626769 | OA |
| GSM4626769_ATCGAGTGCTCTTAT-1  | GSM4626769 | OA |
| GSM4626769_ATCGAGTGCTTTCGG-1  | GSM4626769 | OA |
| GSM4626769_ATCTACTCAAACCTAC-1 | GSM4626769 | OA |
| GSM4626769_ATCTACTCACGTAAGG-1 | GSM4626769 | OA |
| GSM4626769_ATCTACTCACTCAGGC-1 | GSM4626769 | OA |
| GSM4626769_ATCTACTCATCCGGGT-1 | GSM4626769 | OA |
| GSM4626769_ATCTACTGTACTTGAC-1 | GSM4626769 | OA |
| GSM4626769_ATCTACTGTATCACCA-1 | GSM4626769 | OA |
| GSM4626769_ATCTACTGTCATATGC-1 | GSM4626769 | OA |
| GSM4626769_ATCTACTGTTCCGTCT-1 | GSM4626769 | OA |
| GSM4626769_ATCTACTTCTTTAGGG-1 | GSM4626769 | OA |
| GSM4626769_ATCTGCCAGATGTTAG-1 | GSM4626769 | OA |
| GSM4626769_ATCTGCCAGGCCCTTG-1 | GSM4626769 | OA |
| GSM4626769_ATCTGCCAAGTACCT-1  | GSM4626769 | OA |
| GSM4626769_ATCTGCCACATCCAA-1  | GSM4626769 | OA |
| GSM4626769_ATCTGCCCATGCAACT-1 | GSM4626769 | OA |
| GSM4626769_ATCTGCCTCTCGATGA-1 | GSM4626769 | OA |
| GSM4626769_ATGAGGGAGGCCCTCA-1 | GSM4626769 | OA |
| GSM4626769_ATGAGGGCAAGGTGTG-1 | GSM4626769 | OA |

|                               |            |    |
|-------------------------------|------------|----|
| GSM4626769_ATGAGGGCACATCCAA-1 | GSM4626769 | OA |
| GSM4626769_ATGAGGGGTTACCGAT-1 | GSM4626769 | OA |
| GSM4626769_ATGCGATAGAACTCGG-1 | GSM4626769 | OA |
| GSM4626769_ATGCGATAGGACAGAA-1 | GSM4626769 | OA |
| GSM4626769_ATGCGATCACATCCAA-1 | GSM4626769 | OA |
| GSM4626769_ATGCGATGTCACTGGC-1 | GSM4626769 | OA |
| GSM4626769_ATGCGATGTTGAGTTC-1 | GSM4626769 | OA |
| GSM4626769_ATGCGATTCCCAGGTG-1 | GSM4626769 | OA |
| GSM4626769_ATGCGATTCTCAATT-1  | GSM4626769 | OA |
| GSM4626769_ATGCGATTCCGAGGCT-1 | GSM4626769 | OA |
| GSM4626769_ATGGGAGAGCCAGTAG-1 | GSM4626769 | OA |
| GSM4626769_ATGGGAGCATTACGAC-1 | GSM4626769 | OA |
| GSM4626769_ATGTGTGAGAGCAATT-1 | GSM4626769 | OA |
| GSM4626769_ATGTGTGAGTACGCGA-1 | GSM4626769 | OA |
| GSM4626769_ATGTGTGCAGTAAGAT-1 | GSM4626769 | OA |
| GSM4626769_ATGTGTGCATTAGGCT-1 | GSM4626769 | OA |
| GSM4626769_ATGTGTGGTCATATGC-1 | GSM4626769 | OA |
| GSM4626769_ATGTGTGGTCATTAGC-1 | GSM4626769 | OA |
| GSM4626769_ATGTGTGTCTCCGGTT-1 | GSM4626769 | OA |
| GSM4626769_ATTACTCAGTATCGAA-1 | GSM4626769 | OA |
| GSM4626769_ATTACTCCACCCATGG-1 | GSM4626769 | OA |
| GSM4626769_ATTACTCCACTCTGTC-1 | GSM4626769 | OA |
| GSM4626769_ATTACTCTCCATGCTC-1 | GSM4626769 | OA |
| GSM4626769_ATTACTCTCCTGCCAT-1 | GSM4626769 | OA |
| GSM4626769_ATTACTCTCGTTGACA-1 | GSM4626769 | OA |
| GSM4626769_ATTATCCCAGGAACGT-1 | GSM4626769 | OA |
| GSM4626769_ATTATCCCAGGTGGAT-1 | GSM4626769 | OA |
| GSM4626769_ATTATCCGTCCCGACA-1 | GSM4626769 | OA |
| GSM4626769_ATTATCCGTCCCTACT-1 | GSM4626769 | OA |
| GSM4626769_ATTATCCGTCTAAAGA-1 | GSM4626769 | OA |
| GSM4626769_ATTATCCTCAATACCG-1 | GSM4626769 | OA |
| GSM4626769_ATTATCCTCTATCGCC-1 | GSM4626769 | OA |
| GSM4626769_ATTCTACAGACTGTAA-1 | GSM4626769 | OA |
| GSM4626769_ATTCTACAGATCGATA-1 | GSM4626769 | OA |
| GSM4626769_ATTCTACAGTGTTTGC-1 | GSM4626769 | OA |
| GSM4626769_ATTCTACCACCGAAAG-1 | GSM4626769 | OA |
| GSM4626769_ATTCTACCAGTTAACC-1 | GSM4626769 | OA |
| GSM4626769_ATTCTACGTGAGGGAG-1 | GSM4626769 | OA |
| GSM4626769_ATTGGACAGGGTTCCC-1 | GSM4626769 | OA |
| GSM4626769_ATTGGACGTGATGATA-1 | GSM4626769 | OA |
| GSM4626769_ATTGGACGTGCAACTT-1 | GSM4626769 | OA |
| GSM4626769_ATTGGACTCACTCTTA-1 | GSM4626769 | OA |
| GSM4626769_ATTGGACTCGCAAGCC-1 | GSM4626769 | OA |
| GSM4626769_ATTGGACTCTTACCGC-1 | GSM4626769 | OA |
| GSM4626769_ATTGGTGAGCGTAATA-1 | GSM4626769 | OA |
| GSM4626769_ATTGGTGTCAACTCTT-1 | GSM4626769 | OA |
| GSM4626769_ATTGGTGTCCATTAT-1  | GSM4626769 | OA |
| GSM4626769_ATTGGTGTCTAAGCCA-1 | GSM4626769 | OA |
| GSM4626769_ATTTCTGAGACGCTTT-1 | GSM4626769 | OA |
| GSM4626769_ATTTCTGAGCTGAACG-1 | GSM4626769 | OA |
| GSM4626769_ATTTCTGAGTCGATAA-1 | GSM4626769 | OA |
| GSM4626769_ATTTCTGAGTGAACAT-1 | GSM4626769 | OA |
| GSM4626769_ATTTCTGCATCCGCGA-1 | GSM4626769 | OA |
| GSM4626769_ATTTCTGCATCGTCGG-1 | GSM4626769 | OA |
| GSM4626769_ATTTCTGCATGCATGT-1 | GSM4626769 | OA |
| GSM4626769_ATTTCTGCATGGAATA-1 | GSM4626769 | OA |
| GSM4626769_ATTTCTGGTACTTAGC-1 | GSM4626769 | OA |

|                                |            |    |
|--------------------------------|------------|----|
| GSM4626769_ATTTCTGGTCCGTCAG-1  | GSM4626769 | OA |
| GSM4626769_ATTTCTGGTCGCGTT-1   | GSM4626769 | OA |
| GSM4626769_ATTTCTGGTCGGCATC-1  | GSM4626769 | OA |
| GSM4626769_ATTTCTGGTGATAAAC-1  | GSM4626769 | OA |
| GSM4626769_CAACCAAAGAAGGTGA-1  | GSM4626769 | OA |
| GSM4626769_CAACCAAAGGAGTAGA-1  | GSM4626769 | OA |
| GSM4626769_CAACCAAAGGCTACGA-1  | GSM4626769 | OA |
| GSM4626769_CAACCAAAGTCGATAA-1  | GSM4626769 | OA |
| GSM4626769_CAACCAAAGTGGACGT-1  | GSM4626769 | OA |
| GSM4626769_CAACCAAGTTCGCTAA-1  | GSM4626769 | OA |
| GSM4626769_CAACCAATCCTCAACC-1  | GSM4626769 | OA |
| GSM4626769_CAACCAATCTCGGACG-1  | GSM4626769 | OA |
| GSM4626769_CAACCTCAGCCATCGC-1  | GSM4626769 | OA |
| GSM4626769_CAACCTCAGTGGAGAA-1  | GSM4626769 | OA |
| GSM4626769_CAACCTCCATGCCACG-1  | GSM4626769 | OA |
| GSM4626769_CAACCTCGTAAATGAC-1  | GSM4626769 | OA |
| GSM4626769_CAACCTCGTAGTAGTA-1  | GSM4626769 | OA |
| GSM4626769_CAACCTCGTCATACTG-1  | GSM4626769 | OA |
| GSM4626769_CAACCTCGTCCGTGAC-1  | GSM4626769 | OA |
| GSM4626769_CAACCTCGTCGTTCT-1   | GSM4626769 | OA |
| GSM4626769_CAACCTCTCATTGCGA-1  | GSM4626769 | OA |
| GSM4626769_CAACCTAGAGATGAGAG-1 | GSM4626769 | OA |
| GSM4626769_CAACCTAGGTGCAGACA-1 | GSM4626769 | OA |
| GSM4626769_CAACCTAGGTGTTTGGT-1 | GSM4626769 | OA |
| GSM4626769_CAAGAAAAGAAGTGT-1   | GSM4626769 | OA |
| GSM4626769_CAAGAAACAAGGTTTC-1  | GSM4626769 | OA |
| GSM4626769_CAAGAAAGTACCGTAT-1  | GSM4626769 | OA |
| GSM4626769_CAAGAAAGTGCTGTAT-1  | GSM4626769 | OA |
| GSM4626769_CAAGAAAGTTATCACG-1  | GSM4626769 | OA |
| GSM4626769_CAAGAAAGTTGGAGGT-1  | GSM4626769 | OA |
| GSM4626769_CAAGAAATCCGAAGAG-1  | GSM4626769 | OA |
| GSM4626769_CAAGATCAGTCTCGGC-1  | GSM4626769 | OA |
| GSM4626769_CAAGATCCAATGGTCT-1  | GSM4626769 | OA |
| GSM4626769_CAAGATCCAGATGGCA-1  | GSM4626769 | OA |
| GSM4626769_CAAGATCGTTCGACTGC-1 | GSM4626769 | OA |
| GSM4626769_CAAGATCGTCTTGCGG-1  | GSM4626769 | OA |
| GSM4626769_CAAGGCCAGATATACG-1  | GSM4626769 | OA |
| GSM4626769_CAAGGCCAGTGAAGTT-1  | GSM4626769 | OA |
| GSM4626769_CAAGGCCCAAGCGAGT-1  | GSM4626769 | OA |
| GSM4626769_CAAGGCCCACAACTGT-1  | GSM4626769 | OA |
| GSM4626769_CAAGGCCATTCTCG-1    | GSM4626769 | OA |
| GSM4626769_CAAGGCCGTTACCGAT-1  | GSM4626769 | OA |
| GSM4626769_CAAGGCCTCACCTCGT-1  | GSM4626769 | OA |
| GSM4626769_CAAGGCCTCACTTCAT-1  | GSM4626769 | OA |
| GSM4626769_CAAGGCCTCAGCCTAA-1  | GSM4626769 | OA |
| GSM4626769_CAAGTTGAGAACAATC-1  | GSM4626769 | OA |
| GSM4626769_CAAGTTGAGCAATATG-1  | GSM4626769 | OA |
| GSM4626769_CAAGTTGAGGGAGTAA-1  | GSM4626769 | OA |
| GSM4626769_CAAGTTGAGGTGTAA-1   | GSM4626769 | OA |
| GSM4626769_CAAGTTGAGTCCGGTC-1  | GSM4626769 | OA |
| GSM4626769_CAAGTTGCATAGGATA-1  | GSM4626769 | OA |
| GSM4626769_CAAGTTGCATTGTGCA-1  | GSM4626769 | OA |
| GSM4626769_CACAAACGTACGACCC-1  | GSM4626769 | OA |
| GSM4626769_CACAAACTCTTCAACT-1  | GSM4626769 | OA |
| GSM4626769_CACACAACATTAGGCT-1  | GSM4626769 | OA |
| GSM4626769_CACACAAGTTACGTCA-1  | GSM4626769 | OA |
| GSM4626769_CACACAATCAGGATCT-1  | GSM4626769 | OA |



|                               |            |    |
|-------------------------------|------------|----|
| GSM4626769_CACACAATCTCAACTT-1 | GSM4626769 | OA |
| GSM4626769_CACACCTAGGGCTTGA-1 | GSM4626769 | OA |
| GSM4626769_CACACCTCACATTAGC-1 | GSM4626769 | OA |
| GSM4626769_CACACCTCACGCTTTC-1 | GSM4626769 | OA |
| GSM4626769_CACACCTCAGACTCGC-1 | GSM4626769 | OA |
| GSM4626769_CACACCTTCGTACGGC-1 | GSM4626769 | OA |
| GSM4626769_CACACCTTCTGCCCTA-1 | GSM4626769 | OA |
| GSM4626769_CACACTCAGAACAAC-1  | GSM4626769 | OA |
| GSM4626769_CACACTCAGGCCGAAT-1 | GSM4626769 | OA |
| GSM4626769_CACACTCAGTGAACAT-1 | GSM4626769 | OA |
| GSM4626769_CACACTCCAGCAGTTT-1 | GSM4626769 | OA |
| GSM4626769_CACACTCCATAGGATA-1 | GSM4626769 | OA |
| GSM4626769_CACACTCGTAGCCTAT-1 | GSM4626769 | OA |
| GSM4626769_CACACTCGTGAACCTT-1 | GSM4626769 | OA |
| GSM4626769_CACACTCTCGAATCCA-1 | GSM4626769 | OA |
| GSM4626769_CACAGGCCAGTTCATG-1 | GSM4626769 | OA |
| GSM4626769_CACAGGCGTAAACCTC-1 | GSM4626769 | OA |
| GSM4626769_CACAGGCTCATCTGCC-1 | GSM4626769 | OA |
| GSM4626769_CACAGGCTCTAGCACA-1 | GSM4626769 | OA |
| GSM4626769_CACAGTAAGAGGTTAT-1 | GSM4626769 | OA |
| GSM4626769_CACAGTAAGCCGATTT-1 | GSM4626769 | OA |
| GSM4626769_CACAGTAAGTGGGATC-1 | GSM4626769 | OA |
| GSM4626769_CACAGTAGTCGAGTTT-1 | GSM4626769 | OA |
| GSM4626769_CACAGTAGTCTCAACA-1 | GSM4626769 | OA |
| GSM4626769_CACAGTAGTGGCTCCA-1 | GSM4626769 | OA |
| GSM4626769_CACAGTATCCGTTGCT-1 | GSM4626769 | OA |
| GSM4626769_CACATAGAGAGTAATC-1 | GSM4626769 | OA |
| GSM4626769_CACATAGAGCCATCGC-1 | GSM4626769 | OA |
| GSM4626769_CACATAGCAGGAATGC-1 | GSM4626769 | OA |
| GSM4626769_CACATAGCATGCGCAC-1 | GSM4626769 | OA |
| GSM4626769_CACATAGGTGACTCAT-1 | GSM4626769 | OA |
| GSM4626769_CACATAGTCACGCGGT-1 | GSM4626769 | OA |
| GSM4626769_CACATAGTCCCTAACC-1 | GSM4626769 | OA |
| GSM4626769_CACATAGTCGCAGGCT-1 | GSM4626769 | OA |
| GSM4626769_CACATTTAGCCACGTC-1 | GSM4626769 | OA |
| GSM4626769_CACATTTAGGCTCTTA-1 | GSM4626769 | OA |
| GSM4626769_CACATTTAGTATCGAA-1 | GSM4626769 | OA |
| GSM4626769_CACATTTAGTCGTTTG-1 | GSM4626769 | OA |
| GSM4626769_CACATTTCAACTTGAC-1 | GSM4626769 | OA |
| GSM4626769_CACATTTCAAGTAGTA-1 | GSM4626769 | OA |
| GSM4626769_CACATTTCAGATCGGA-1 | GSM4626769 | OA |
| GSM4626769_CACATTTGTCAAAC-1   | GSM4626769 | OA |
| GSM4626769_CACATTTGTGATGTCT-1 | GSM4626769 | OA |
| GSM4626769_CACATTTTCCCGGATG-1 | GSM4626769 | OA |
| GSM4626769_CACATTTTCGTTGCCT-1 | GSM4626769 | OA |
| GSM4626769_CACCACTAGGGTGTG-1  | GSM4626769 | OA |
| GSM4626769_CACCACTCACTGGCC-1  | GSM4626769 | OA |
| GSM4626769_CACCACTCACAGACTT-1 | GSM4626769 | OA |
| GSM4626769_CACCACTGTAACGCGA-1 | GSM4626769 | OA |
| GSM4626769_CACCACTGTAGGACAC-1 | GSM4626769 | OA |
| GSM4626769_CACCACTGTTCCCGAG-1 | GSM4626769 | OA |
| GSM4626769_CACCACTTCAAAACC-1  | GSM4626769 | OA |
| GSM4626769_CACCACTTCTCGGACG-1 | GSM4626769 | OA |
| GSM4626769_CACCAGGAGATCCCAT-1 | GSM4626769 | OA |
| GSM4626769_CACCAGGAGCACCGTC-1 | GSM4626769 | OA |
| GSM4626769_CACCAGGCATTGGGCC-1 | GSM4626769 | OA |
| GSM4626769_CACCAGGGTAATAGCA-1 | GSM4626769 | OA |

|                                |            |    |
|--------------------------------|------------|----|
| GSM4626769_CACCAGGTCCGTTGTC-1  | GSM4626769 | OA |
| GSM4626769_CACCTTGCAGGTGGAT-1  | GSM4626769 | OA |
| GSM4626769_CACCTTGCATTAGGCT-1  | GSM4626769 | OA |
| GSM4626769_CACCTTGGTGCATCTA-1  | GSM4626769 | OA |
| GSM4626769_CACCTTGGTTCAGTAC-1  | GSM4626769 | OA |
| GSM4626769_CACCTTGTCCGGCTACG-1 | GSM4626769 | OA |
| GSM4626769_CACTCCAAGATGCCAG-1  | GSM4626769 | OA |
| GSM4626769_CACTCCACAAGTCTAC-1  | GSM4626769 | OA |
| GSM4626769_CACTCCACAATAGCAA-1  | GSM4626769 | OA |
| GSM4626769_CACTCCACACATTAGC-1  | GSM4626769 | OA |
| GSM4626769_CACTCCACAGACGTAG-1  | GSM4626769 | OA |
| GSM4626769_CACTCCACAGCTCGCA-1  | GSM4626769 | OA |
| GSM4626769_CACTCCACATTCTCAT-1  | GSM4626769 | OA |
| GSM4626769_CACTCCAGTACAGTGG-1  | GSM4626769 | OA |
| GSM4626769_CACTCCAGTCATTAGC-1  | GSM4626769 | OA |
| GSM4626769_CACTCCATCGAGGTAG-1  | GSM4626769 | OA |
| GSM4626769_CAGAATCAGGGATCTG-1  | GSM4626769 | OA |
| GSM4626769_CAGAATCCACCGGAAA-1  | GSM4626769 | OA |
| GSM4626769_CAGAATCCATCATCCC-1  | GSM4626769 | OA |
| GSM4626769_CAGAATCTCACGCATA-1  | GSM4626769 | OA |
| GSM4626769_CAGAATCTCTACCAGA-1  | GSM4626769 | OA |
| GSM4626769_CAGAATCTCTCTAGGA-1  | GSM4626769 | OA |
| GSM4626769_CAGAATCTCTTAACCT-1  | GSM4626769 | OA |
| GSM4626769_CAGAGAGCAAGTTAAG-1  | GSM4626769 | OA |
| GSM4626769_CAGAGAGCATGTAAGA-1  | GSM4626769 | OA |
| GSM4626769_CAGAGAGGTAGGCATG-1  | GSM4626769 | OA |
| GSM4626769_CAGAGAGGTTCGAGATG-1 | GSM4626769 | OA |
| GSM4626769_CAGAGAGTCCAAACAC-1  | GSM4626769 | OA |
| GSM4626769_CAGAGAGTCGCACTCT-1  | GSM4626769 | OA |
| GSM4626769_CAGATCACAATCACAC-1  | GSM4626769 | OA |
| GSM4626769_CAGATCACACATGTGT-1  | GSM4626769 | OA |
| GSM4626769_CAGATCACACGTCTCT-1  | GSM4626769 | OA |
| GSM4626769_CAGATCATCACTATTC-1  | GSM4626769 | OA |
| GSM4626769_CAGATCATCGACCAGC-1  | GSM4626769 | OA |
| GSM4626769_CAGCAGCAGGATCGCA-1  | GSM4626769 | OA |
| GSM4626769_CAGCAGCAGGGTGTGT-1  | GSM4626769 | OA |
| GSM4626769_CAGCAGCAGGTTACCT-1  | GSM4626769 | OA |
| GSM4626769_CAGCAGCGTACAAGTA-1  | GSM4626769 | OA |
| GSM4626769_CAGCAGCGTCCGCATC-1  | GSM4626769 | OA |
| GSM4626769_CAGCAGCGTTCAACCA-1  | GSM4626769 | OA |
| GSM4626769_CAGCAGCGTTCCACTC-1  | GSM4626769 | OA |
| GSM4626769_CAGCATAAGATGTGGC-1  | GSM4626769 | OA |
| GSM4626769_CAGCATAAGGACATTA-1  | GSM4626769 | OA |
| GSM4626769_CAGCATAAGCCTTGG-1   | GSM4626769 | OA |
| GSM4626769_CAGCATAGTAGAGGAA-1  | GSM4626769 | OA |
| GSM4626769_CAGCATATCTTAGAGC-1  | GSM4626769 | OA |
| GSM4626769_CAGCCGAGTGAGCGAT-1  | GSM4626769 | OA |
| GSM4626769_CAGCCGATCACTGGGC-1  | GSM4626769 | OA |
| GSM4626769_CAGCCGATCATGTCTT-1  | GSM4626769 | OA |
| GSM4626769_CAGCCGATCGGCATCG-1  | GSM4626769 | OA |
| GSM4626769_CAGCGACAGACTGTAA-1  | GSM4626769 | OA |
| GSM4626769_CAGCGACAGAGAACAG-1  | GSM4626769 | OA |
| GSM4626769_CAGCGACAGGGTATCG-1  | GSM4626769 | OA |
| GSM4626769_CAGCGACAGTGACTION-1 | GSM4626769 | OA |
| GSM4626769_CAGCGACCATCAGTCA-1  | GSM4626769 | OA |
| GSM4626769_CAGCGACGTGACAAAT-1  | GSM4626769 | OA |
| GSM4626769_CAGCGACGTTATCACG-1  | GSM4626769 | OA |

|                                |            |    |
|--------------------------------|------------|----|
| GSM4626769_CAGCGACGTTTGACAC-1  | GSM4626769 | OA |
| GSM4626769_CAGCGACTCCAATGGT-1  | GSM4626769 | OA |
| GSM4626769_CAGCTAAAGCCCAGCT-1  | GSM4626769 | OA |
| GSM4626769_CAGCTAAAGGGATCTG-1  | GSM4626769 | OA |
| GSM4626769_CAGCTAACAAATCTGCA-1 | GSM4626769 | OA |
| GSM4626769_CAGCTAACAGCATACT-1  | GSM4626769 | OA |
| GSM4626769_CAGCTAACATTGGCGC-1  | GSM4626769 | OA |
| GSM4626769_CAGCTAAGTCTCCATC-1  | GSM4626769 | OA |
| GSM4626769_CAGCTAAGTGTGTGCC-1  | GSM4626769 | OA |
| GSM4626769_CAGCTAAGTTACGCGC-1  | GSM4626769 | OA |
| GSM4626769_CAGCTAATCGCCGTGA-1  | GSM4626769 | OA |
| GSM4626769_CAGCTGGCACATGTGT-1  | GSM4626769 | OA |
| GSM4626769_CAGCTGGGTAAGTGTA-1  | GSM4626769 | OA |
| GSM4626769_CAGCTGGGTCAACATC-1  | GSM4626769 | OA |
| GSM4626769_CAGCTGGTCCGTAGGC-1  | GSM4626769 | OA |
| GSM4626769_CAGCTGGTCTACTTAC-1  | GSM4626769 | OA |
| GSM4626769_CAGGTGCAGTCTTGCA-1  | GSM4626769 | OA |
| GSM4626769_CAGGTGCCAACCGCCA-1  | GSM4626769 | OA |
| GSM4626769_CAGGTGCCAACTGCGC-1  | GSM4626769 | OA |
| GSM4626769_CAGGTGCCAGACAGGT-1  | GSM4626769 | OA |
| GSM4626769_CAGGTGCCAGCGTAAG-1  | GSM4626769 | OA |
| GSM4626769_CAGGTGCGTCAAATC-1   | GSM4626769 | OA |
| GSM4626769_CAGGTGCGTCGCGTGT-1  | GSM4626769 | OA |
| GSM4626769_CAGGTGCGTCGTCTTC-1  | GSM4626769 | OA |
| GSM4626769_CAGGTGCGTGGGTATG-1  | GSM4626769 | OA |
| GSM4626769_CAGGTGCGTGTGAATA-1  | GSM4626769 | OA |
| GSM4626769_CAGGTGCGTTCGTCTC-1  | GSM4626769 | OA |
| GSM4626769_CAGGTGCTCATGGTCA-1  | GSM4626769 | OA |
| GSM4626769_CAGTAACAGCTTTGGT-1  | GSM4626769 | OA |
| GSM4626769_CAGTAACCAATCGGTT-1  | GSM4626769 | OA |
| GSM4626769_CAGTAACCAGGGTATG-1  | GSM4626769 | OA |
| GSM4626769_CAGTAACGTACCGGCT-1  | GSM4626769 | OA |
| GSM4626769_CAGTAACGTGGACGAT-1  | GSM4626769 | OA |
| GSM4626769_CAGTAACGTTCCGTCT-1  | GSM4626769 | OA |
| GSM4626769_CAGTAACTACCAGGC-1   | GSM4626769 | OA |
| GSM4626769_CAGTCCTAGAGGTTGC-1  | GSM4626769 | OA |
| GSM4626769_CAGTCCTAGCCAGGAT-1  | GSM4626769 | OA |
| GSM4626769_CAGTCCTCACAGGAGT-1  | GSM4626769 | OA |
| GSM4626769_CAGTCCTCATCATCCC-1  | GSM4626769 | OA |
| GSM4626769_CAGTCCTGTCATGCCG-1  | GSM4626769 | OA |
| GSM4626769_CAGTCCTGTGGTCTCG-1  | GSM4626769 | OA |
| GSM4626769_CATATGGAGCAGACTG-1  | GSM4626769 | OA |
| GSM4626769_CATATGGAGCTAAACA-1  | GSM4626769 | OA |
| GSM4626769_CATATGGCAGTCGATT-1  | GSM4626769 | OA |
| GSM4626769_CATATGGGTTCAAGCC-1  | GSM4626769 | OA |
| GSM4626769_CATATGGTCCTGTAGA-1  | GSM4626769 | OA |
| GSM4626769_CATATGGTCTTCTGGC-1  | GSM4626769 | OA |
| GSM4626769_CATATTCAGCAGGTCA-1  | GSM4626769 | OA |
| GSM4626769_CATATTCACAGACAG-1   | GSM4626769 | OA |
| GSM4626769_CATATTCATGAACCT-1   | GSM4626769 | OA |
| GSM4626769_CATATTCATGCATGT-1   | GSM4626769 | OA |
| GSM4626769_CATATTCGATTACCG-1   | GSM4626769 | OA |
| GSM4626769_CATATTCGTTCTGTTGA-1 | GSM4626769 | OA |
| GSM4626769_CATATTCCTCGGTGTCG-1 | GSM4626769 | OA |
| GSM4626769_CATATTCCTCCCTGA-1   | GSM4626769 | OA |
| GSM4626769_CATCAAGAGTCCATAC-1  | GSM4626769 | OA |
| GSM4626769_CATCAAGCAGTATAAG-1  | GSM4626769 | OA |

|                               |            |    |
|-------------------------------|------------|----|
| GSM4626769_CATCAAGGTCATATGC-1 | GSM4626769 | OA |
| GSM4626769_CATCAAGGTCATTAGC-1 | GSM4626769 | OA |
| GSM4626769_CATCAGAAGGCGACAT-1 | GSM4626769 | OA |
| GSM4626769_CATCAGAAGTAGTGCG-1 | GSM4626769 | OA |
| GSM4626769_CATCAGACACATGTGT-1 | GSM4626769 | OA |
| GSM4626769_CATCAGACATGATCCA-1 | GSM4626769 | OA |
| GSM4626769_CATCAGAGTCGCATAT-1 | GSM4626769 | OA |
| GSM4626769_CATCAGAGTCTAGTCA-1 | GSM4626769 | OA |
| GSM4626769_CATCAGAGTTCACCTC-1 | GSM4626769 | OA |
| GSM4626769_CATCAGAGTTCCAACA-1 | GSM4626769 | OA |
| GSM4626769_CATCAGATCAACTCTT-1 | GSM4626769 | OA |
| GSM4626769_CATCAGATCGCCAGCA-1 | GSM4626769 | OA |
| GSM4626769_CATCCACCAGTATCTG-1 | GSM4626769 | OA |
| GSM4626769_CATCCACCATGCGCAC-1 | GSM4626769 | OA |
| GSM4626769_CATCCACGTCAACATC-1 | GSM4626769 | OA |
| GSM4626769_CATCCACGTGGTCTCG-1 | GSM4626769 | OA |
| GSM4626769_CATCCACTCAGCCTAA-1 | GSM4626769 | OA |
| GSM4626769_CATCGAAAGACTGTAA-1 | GSM4626769 | OA |
| GSM4626769_CATCGAACAGGATCGA-1 | GSM4626769 | OA |
| GSM4626769_CATCGAACATCGGTTA-1 | GSM4626769 | OA |
| GSM4626769_CATCGAAGTCTCTCGT-1 | GSM4626769 | OA |
| GSM4626769_CATCGAAGTTGTACAC-1 | GSM4626769 | OA |
| GSM4626769_CATCGAATCATGTGGT-1 | GSM4626769 | OA |
| GSM4626769_CATCGGGAGTCAAGGC-1 | GSM4626769 | OA |
| GSM4626769_CATCGGGCACAGACAG-1 | GSM4626769 | OA |
| GSM4626769_CATCGGGCATGCCACG-1 | GSM4626769 | OA |
| GSM4626769_CATCGGGTCAAACAAG-1 | GSM4626769 | OA |
| GSM4626769_CATCGGGTCAGCAACT-1 | GSM4626769 | OA |
| GSM4626769_CATCGGGTCCAGATCA-1 | GSM4626769 | OA |
| GSM4626769_CATCGGGTCTCAAGTG-1 | GSM4626769 | OA |
| GSM4626769_CATCGGGTCTGAGTGT-1 | GSM4626769 | OA |
| GSM4626769_CATCGGGTCTTGCCGT-1 | GSM4626769 | OA |
| GSM4626769_CATGACAAGGATGGAA-1 | GSM4626769 | OA |
| GSM4626769_CATGACAAGTCCATAC-1 | GSM4626769 | OA |
| GSM4626769_CATGACACAAGCGAGT-1 | GSM4626769 | OA |
| GSM4626769_CATGACACAGTGACAG-1 | GSM4626769 | OA |
| GSM4626769_CATGACAGTAGGAGTC-1 | GSM4626769 | OA |
| GSM4626769_CATGACAGTCTAGTCA-1 | GSM4626769 | OA |
| GSM4626769_CATGACATCAGTACGT-1 | GSM4626769 | OA |
| GSM4626769_CATGACATCGCATGGC-1 | GSM4626769 | OA |
| GSM4626769_CATGACATCTTCATGT-1 | GSM4626769 | OA |
| GSM4626769_CATGCCTAGACTCGGA-1 | GSM4626769 | OA |
| GSM4626769_CATGCCTCAATCAGAA-1 | GSM4626769 | OA |
| GSM4626769_CATGCCTCACTGTCGG-1 | GSM4626769 | OA |
| GSM4626769_CATGCCTCAGGGCATA-1 | GSM4626769 | OA |
| GSM4626769_CATGCCTCAGGGTATG-1 | GSM4626769 | OA |
| GSM4626769_CATGCCTTCATAGCAC-1 | GSM4626769 | OA |
| GSM4626769_CATGCCTTCCGTACAA-1 | GSM4626769 | OA |
| GSM4626769_CATGGCGCAAGCGTAG-1 | GSM4626769 | OA |
| GSM4626769_CATGGCGCAGCTGCTG-1 | GSM4626769 | OA |
| GSM4626769_CATGGCGCATGGAATA-1 | GSM4626769 | OA |
| GSM4626769_CATGGCGGTCTGGTCG-1 | GSM4626769 | OA |
| GSM4626769_CATGGCGGTGCACGAA-1 | GSM4626769 | OA |
| GSM4626769_CATGGCGGTGTAAGTA-1 | GSM4626769 | OA |
| GSM4626769_CATTATCAGCACCGTC-1 | GSM4626769 | OA |
| GSM4626769_CATTATCAGGAATCGC-1 | GSM4626769 | OA |
| GSM4626769_CATTATCCAATAACGA-1 | GSM4626769 | OA |

|                                |            |    |
|--------------------------------|------------|----|
| GSM4626769_CATTATCCAATGTAAG-1  | GSM4626769 | OA |
| GSM4626769_CATTATCGTACCGTAT-1  | GSM4626769 | OA |
| GSM4626769_CATTATCGTCGCGTGT-1  | GSM4626769 | OA |
| GSM4626769_CATTATCGTCTGCGGT-1  | GSM4626769 | OA |
| GSM4626769_CATTATCGTGTCTCT-1   | GSM4626769 | OA |
| GSM4626769_CATTATCGTTATTCTC-1  | GSM4626769 | OA |
| GSM4626769_CATTATCTCAGCACAT-1  | GSM4626769 | OA |
| GSM4626769_CATTATCTCATCGCTC-1  | GSM4626769 | OA |
| GSM4626769_CATTTCGAGAGACGAA-1  | GSM4626769 | OA |
| GSM4626769_CATTTCGAGACTTGC-1   | GSM4626769 | OA |
| GSM4626769_CATTTCGCCAAAGGAAG-1 | GSM4626769 | OA |
| GSM4626769_CATTTCGCCAGTGAGTG-1 | GSM4626769 | OA |
| GSM4626769_CATTTCGCCATCGGGTC-1 | GSM4626769 | OA |
| GSM4626769_CATTTCGCGTAAACACA-1 | GSM4626769 | OA |
| GSM4626769_CATTTCGCGTAGGACAC-1 | GSM4626769 | OA |
| GSM4626769_CCAATCCAGGCTAGAC-1  | GSM4626769 | OA |
| GSM4626769_CCAATCCCAGCGTCCA-1  | GSM4626769 | OA |
| GSM4626769_CCAATCCGTAGAAGGA-1  | GSM4626769 | OA |
| GSM4626769_CCAATCCGTGACCAAG-1  | GSM4626769 | OA |
| GSM4626769_CCACCTAAGAGCTGGT-1  | GSM4626769 | OA |
| GSM4626769_CCACCTACATGGGACA-1  | GSM4626769 | OA |
| GSM4626769_CCACCTAGTCGCTTTC-1  | GSM4626769 | OA |
| GSM4626769_CCACCTAGTGAGCGAT-1  | GSM4626769 | OA |
| GSM4626769_CCACCTAGTGTAAGTA-1  | GSM4626769 | OA |
| GSM4626769_CCACCTAGTTCCAACA-1  | GSM4626769 | OA |
| GSM4626769_CCACGGAAGAGCAATT-1  | GSM4626769 | OA |
| GSM4626769_CCACGGAAGGTAAACT-1  | GSM4626769 | OA |
| GSM4626769_CCACGGAAGTGAACAT-1  | GSM4626769 | OA |
| GSM4626769_CCACTACAGAACTGTA-1  | GSM4626769 | OA |
| GSM4626769_CCACTACAGTCCGTAT-1  | GSM4626769 | OA |
| GSM4626769_CCACTACCATACAGCT-1  | GSM4626769 | OA |
| GSM4626769_CCACTACCATCGATGT-1  | GSM4626769 | OA |
| GSM4626769_CCACTACGTCACCTAA-1  | GSM4626769 | OA |
| GSM4626769_CCAGCGACACCTCGGA-1  | GSM4626769 | OA |
| GSM4626769_CCAGCGAGTTCGCGAC-1  | GSM4626769 | OA |
| GSM4626769_CCATGTCAGGTGATTA-1  | GSM4626769 | OA |
| GSM4626769_CCATGTCCACATCCAA-1  | GSM4626769 | OA |
| GSM4626769_CCATGTCCACGAAATA-1  | GSM4626769 | OA |
| GSM4626769_CCATGTTCGTCGGTAC-1  | GSM4626769 | OA |
| GSM4626769_CCATGTTCGTCCTTAT-1  | GSM4626769 | OA |
| GSM4626769_CCATGTTCGTCGCTG-1   | GSM4626769 | OA |
| GSM4626769_CCATGTTCGTTGCGTTA-1 | GSM4626769 | OA |
| GSM4626769_CCATGTTCGTTGCTCCT-1 | GSM4626769 | OA |
| GSM4626769_CCATTCGAGAGGACGG-1  | GSM4626769 | OA |
| GSM4626769_CCATTCGAGGGATCTG-1  | GSM4626769 | OA |
| GSM4626769_CCATTCGCAAGTAGTA-1  | GSM4626769 | OA |
| GSM4626769_CCATTCGCATATGAGA-1  | GSM4626769 | OA |
| GSM4626769_CCATTCGCATCGGAAG-1  | GSM4626769 | OA |
| GSM4626769_CCATTCGGTTAAGGGC-1  | GSM4626769 | OA |
| GSM4626769_CCATTCGGTTACGGAG-1  | GSM4626769 | OA |
| GSM4626769_CCATTCGTCCACGTTTC-1 | GSM4626769 | OA |
| GSM4626769_CCATTCGTCTCTTGAT-1  | GSM4626769 | OA |
| GSM4626769_CCCAATCAGGCGACAT-1  | GSM4626769 | OA |
| GSM4626769_CCCAATCGTCTTGCGG-1  | GSM4626769 | OA |
| GSM4626769_CCCAATCGTGTCGCTG-1  | GSM4626769 | OA |
| GSM4626769_CCCAATCTCGACCAGC-1  | GSM4626769 | OA |
| GSM4626769_CCCAGTTAGGCATGTG-1  | GSM4626769 | OA |

|                                |            |    |
|--------------------------------|------------|----|
| GSM4626769_CCCAGTTAGTACCGGA-1  | GSM4626769 | OA |
| GSM4626769_CCCAGTTCAAACAACA-1  | GSM4626769 | OA |
| GSM4626769_CCCAGTTGTATAGGGC-1  | GSM4626769 | OA |
| GSM4626769_CCCAGTTGTGCTCTTC-1  | GSM4626769 | OA |
| GSM4626769_CCCAGTTTCACAGGCC-1  | GSM4626769 | OA |
| GSM4626769_CCCATACCAACTGCTA-1  | GSM4626769 | OA |
| GSM4626769_CCCATACGTAAGAGAG-1  | GSM4626769 | OA |
| GSM4626769_CCCATACGTGAGTATA-1  | GSM4626769 | OA |
| GSM4626769_CCCATACTCCTTGGTC-1  | GSM4626769 | OA |
| GSM4626769_CCCTCCTAGTCATGCT-1  | GSM4626769 | OA |
| GSM4626769_CCCTCCTCAACGATCT-1  | GSM4626769 | OA |
| GSM4626769_CCCTCCTCACCATGTA-1  | GSM4626769 | OA |
| GSM4626769_CCCTCCTCATGTCTCC-1  | GSM4626769 | OA |
| GSM4626769_CCCTCCTTCATACGGT-1  | GSM4626769 | OA |
| GSM4626769_CCCTCCTTCCAGTAGT-1  | GSM4626769 | OA |
| GSM4626769_CCCTCCTTCGTGGTTCG-1 | GSM4626769 | OA |
| GSM4626769_CCGGGATAGACTCGGA-1  | GSM4626769 | OA |
| GSM4626769_CCGGGATAGCAGCGTA-1  | GSM4626769 | OA |
| GSM4626769_CCGGGATCAATAAGCA-1  | GSM4626769 | OA |
| GSM4626769_CCGGGATCATCATCCC-1  | GSM4626769 | OA |
| GSM4626769_CCGGGATTTCAGGCCCA-1 | GSM4626769 | OA |
| GSM4626769_CCGGGATTCTTGAGGT-1  | GSM4626769 | OA |
| GSM4626769_CCGGTAGGTTACGCGC-1  | GSM4626769 | OA |
| GSM4626769_CCGGTAGGTTATTCTC-1  | GSM4626769 | OA |
| GSM4626769_CCGTACTAGATCACGG-1  | GSM4626769 | OA |
| GSM4626769_CCGTACTAGGCACATG-1  | GSM4626769 | OA |
| GSM4626769_CCGTACTCACAACGT-1   | GSM4626769 | OA |
| GSM4626769_CCGTACTCACGGTTTA-1  | GSM4626769 | OA |
| GSM4626769_CCGTACTCACTACAGT-1  | GSM4626769 | OA |
| GSM4626769_CCGTACTGTCCGTCAG-1  | GSM4626769 | OA |
| GSM4626769_CCGTACTGTTCGTGAT-1  | GSM4626769 | OA |
| GSM4626769_CCGTACTTCCGAGCCA-1  | GSM4626769 | OA |
| GSM4626769_CCGTACTTCTTCCTTC-1  | GSM4626769 | OA |
| GSM4626769_CCGTGGACACGCCAGT-1  | GSM4626769 | OA |
| GSM4626769_CCGTGGACAGGAATGC-1  | GSM4626769 | OA |
| GSM4626769_CCGTGGACATGCATGT-1  | GSM4626769 | OA |
| GSM4626769_CCGTGGAGTTAAGGGC-1  | GSM4626769 | OA |
| GSM4626769_CCGTGGATCACCGTAA-1  | GSM4626769 | OA |
| GSM4626769_CCGTGGATCCATTAT-1   | GSM4626769 | OA |
| GSM4626769_CCGTGGATCTTACCGC-1  | GSM4626769 | OA |
| GSM4626769_CCGTTCAAGCTAACTC-1  | GSM4626769 | OA |
| GSM4626769_CCGTTCAAGTATGACA-1  | GSM4626769 | OA |
| GSM4626769_CCGTTCAAGTGCGTGA-1  | GSM4626769 | OA |
| GSM4626769_CCGTTCACAAGGGTCA-1  | GSM4626769 | OA |
| GSM4626769_CCGTTCACAAGTTCTG-1  | GSM4626769 | OA |
| GSM4626769_CCGTTCACAGGTTTCA-1  | GSM4626769 | OA |
| GSM4626769_CCGTTCAGTGAACCTT-1  | GSM4626769 | OA |
| GSM4626769_CCGTTCATCCAGAAGG-1  | GSM4626769 | OA |
| GSM4626769_CCGTTCATCTCTTGAT-1  | GSM4626769 | OA |
| GSM4626769_CCTAAAGAGAACTGTA-1  | GSM4626769 | OA |
| GSM4626769_CCTAAAGAGTACCGGA-1  | GSM4626769 | OA |
| GSM4626769_CCTAAAGTCATCTGTT-1  | GSM4626769 | OA |
| GSM4626769_CCTACACCACCGCTAG-1  | GSM4626769 | OA |
| GSM4626769_CCTACACCACGTGAGA-1  | GSM4626769 | OA |
| GSM4626769_CCTACACCATCTACGA-1  | GSM4626769 | OA |
| GSM4626769_CCTACACGTTCCACGG-1  | GSM4626769 | OA |
| GSM4626769_CCTACACTCCTTGGTC-1  | GSM4626769 | OA |

|                                |            |    |
|--------------------------------|------------|----|
| GSM4626769_CCTACACTCTGAAAGA-1  | GSM4626769 | OA |
| GSM4626769_CCTACCAAGAGGGATA-1  | GSM4626769 | OA |
| GSM4626769_CCTACCAAGATCGGGT-1  | GSM4626769 | OA |
| GSM4626769_CCTACCACAATAGCAA-1  | GSM4626769 | OA |
| GSM4626769_CCTACCACACCAGATT-1  | GSM4626769 | OA |
| GSM4626769_CCTACCACACGGTTTA-1  | GSM4626769 | OA |
| GSM4626769_CCTACCACATGTAGTC-1  | GSM4626769 | OA |
| GSM4626769_CCTACCAGTACTCAAC-1  | GSM4626769 | OA |
| GSM4626769_CCTAGCTAGTGAACAT-1  | GSM4626769 | OA |
| GSM4626769_CCTAGCTGTCCGAATT-1  | GSM4626769 | OA |
| GSM4626769_CCTAGCTTCGAACTGT-1  | GSM4626769 | OA |
| GSM4626769_CCTAGCTTCGCACTCT-1  | GSM4626769 | OA |
| GSM4626769_CCTATTAAGTATCTCG-1  | GSM4626769 | OA |
| GSM4626769_CCTATTAAGTGACATA-1  | GSM4626769 | OA |
| GSM4626769_CCTATTAAGTTAAGTG-1  | GSM4626769 | OA |
| GSM4626769_CCTATTACATCACCCCT-1 | GSM4626769 | OA |
| GSM4626769_CCTATTACATTCACTT-1  | GSM4626769 | OA |
| GSM4626769_CCTATTATCCTGCCAT-1  | GSM4626769 | OA |
| GSM4626769_CCTCAGTAGAATAGGG-1  | GSM4626769 | OA |
| GSM4626769_CCTCAGTAGCCTTGAT-1  | GSM4626769 | OA |
| GSM4626769_CCTCAGTCAACACCCG-1  | GSM4626769 | OA |
| GSM4626769_CCTCAGTCAACGATGG-1  | GSM4626769 | OA |
| GSM4626769_CCTCAGTCAAGGTGTG-1  | GSM4626769 | OA |
| GSM4626769_CCTCAGTCACATGTGT-1  | GSM4626769 | OA |
| GSM4626769_CCTCAGTGTAGCTAAA-1  | GSM4626769 | OA |
| GSM4626769_CCTCAGTGTTGCGCAC-1  | GSM4626769 | OA |
| GSM4626769_CCTCAGTTCACGTTT-1   | GSM4626769 | OA |
| GSM4626769_CCTCAGTTCGAACGGA-1  | GSM4626769 | OA |
| GSM4626769_CCTCTGAAGTCCGGTC-1  | GSM4626769 | OA |
| GSM4626769_CCTCTGAAGTGACTCT-1  | GSM4626769 | OA |
| GSM4626769_CCTCTGACACCAGATT-1  | GSM4626769 | OA |
| GSM4626769_CCTCTGACACTGTCGG-1  | GSM4626769 | OA |
| GSM4626769_CCTCTGAGTAGGGTAC-1  | GSM4626769 | OA |
| GSM4626769_CCTCTGAGTCCGAAGA-1  | GSM4626769 | OA |
| GSM4626769_CCTTACGAGATCCCAT-1  | GSM4626769 | OA |
| GSM4626769_CCTTACGAGTACGCC-1   | GSM4626769 | OA |
| GSM4626769_CCTTACGCAAGGACAC-1  | GSM4626769 | OA |
| GSM4626769_CCTTACGCAAGTCATC-1  | GSM4626769 | OA |
| GSM4626769_CCTTACGCATCCGGGT-1  | GSM4626769 | OA |
| GSM4626769_CCTTACGGTTAAGAAC-1  | GSM4626769 | OA |
| GSM4626769_CCTTACGTGCGGATCG-1  | GSM4626769 | OA |
| GSM4626769_CCTTACGTGCGCGGTT-1  | GSM4626769 | OA |
| GSM4626769_CCTTCCCATCGGGTC-1   | GSM4626769 | OA |
| GSM4626769_CCTTCCCGTCGAAAGC-1  | GSM4626769 | OA |
| GSM4626769_CCTTCGAAGAAACGCC-1  | GSM4626769 | OA |
| GSM4626769_CCTTCGACAAGCGAGT-1  | GSM4626769 | OA |
| GSM4626769_CCTTCGACAAGGTTTC-1  | GSM4626769 | OA |
| GSM4626769_CCTTCGAGTCTAGCGC-1  | GSM4626769 | OA |
| GSM4626769_CCTTTCTCAGCTGTGC-1  | GSM4626769 | OA |
| GSM4626769_CCTTTCTCAGGCAGTA-1  | GSM4626769 | OA |
| GSM4626769_CCTTTCTCATCAGTAC-1  | GSM4626769 | OA |
| GSM4626769_CCTTTCTCATGTAAGA-1  | GSM4626769 | OA |
| GSM4626769_CCTTTCTGTTAGATGA-1  | GSM4626769 | OA |
| GSM4626769_CCTTTCTGTTGTCTTT-1  | GSM4626769 | OA |
| GSM4626769_CCTTTCTTCCAGGGCT-1  | GSM4626769 | OA |
| GSM4626769_CCTTTCTTCCAGTATG-1  | GSM4626769 | OA |
| GSM4626769_CCTTTCTTCTTGTGCAT-1 | GSM4626769 | OA |

|                                |            |    |
|--------------------------------|------------|----|
| GSM4626769_CGAACATAGGGAGTAA-1  | GSM4626769 | OA |
| GSM4626769_CGAACATAGTCCTCCT-1  | GSM4626769 | OA |
| GSM4626769_CGAACATCACAGGAGT-1  | GSM4626769 | OA |
| GSM4626769_CGAACATCACCCATTC-1  | GSM4626769 | OA |
| GSM4626769_CGAACATCATATGGTC-1  | GSM4626769 | OA |
| GSM4626769_CGAACATTCAATCACG-1  | GSM4626769 | OA |
| GSM4626769_CGAACATTCAGTGTTG-1  | GSM4626769 | OA |
| GSM4626769_CGAACATTCATTCACT-1  | GSM4626769 | OA |
| GSM4626769_CGAACATTCCGTACAA-1  | GSM4626769 | OA |
| GSM4626769_CGAACATTCGTTTAGG-1  | GSM4626769 | OA |
| GSM4626769_CGAATGTAGTGAAGTT-1  | GSM4626769 | OA |
| GSM4626769_CGAATGTCAATCGAAA-1  | GSM4626769 | OA |
| GSM4626769_CGAATGTTCAGAGACG-1  | GSM4626769 | OA |
| GSM4626769_CGAATGTTCTTCAAT-1   | GSM4626769 | OA |
| GSM4626769_CGACCTTAGAGACTTA-1  | GSM4626769 | OA |
| GSM4626769_CGACCTTAGAGCAATT-1  | GSM4626769 | OA |
| GSM4626769_CGACCTTAGCTGCGAA-1  | GSM4626769 | OA |
| GSM4626769_CGACCTTCAATGTTGC-1  | GSM4626769 | OA |
| GSM4626769_CGACCTTCAGACAGGT-1  | GSM4626769 | OA |
| GSM4626769_CGACCTTCAGCTCCGA-1  | GSM4626769 | OA |
| GSM4626769_CGACCTTGTCTTGCGG-1  | GSM4626769 | OA |
| GSM4626769_CGACCTTGTGCTGTAT-1  | GSM4626769 | OA |
| GSM4626769_CGACCTTCAAGAAGT-1   | GSM4626769 | OA |
| GSM4626769_CGACTTCCAAGTAATG-1  | GSM4626769 | OA |
| GSM4626769_CGACTTCCACAAGTAA-1  | GSM4626769 | OA |
| GSM4626769_CGACTTCCATTGGCGC-1  | GSM4626769 | OA |
| GSM4626769_CGACTTCGTTAAGAAC-1  | GSM4626769 | OA |
| GSM4626769_CGACTTCTCACTATTC-1  | GSM4626769 | OA |
| GSM4626769_CGAGAAGAGGATTCGG-1  | GSM4626769 | OA |
| GSM4626769_CGAGAAGCAATGGATA-1  | GSM4626769 | OA |
| GSM4626769_CGAGAAGCATCTCCCA-1  | GSM4626769 | OA |
| GSM4626769_CGAGAAGGTGAGGCTA-1  | GSM4626769 | OA |
| GSM4626769_CGAGAAGTCAGCAACT-1  | GSM4626769 | OA |
| GSM4626769_CGAGAAGTCCATGAAC-1  | GSM4626769 | OA |
| GSM4626769_CGAGAAGTCGGTCTAA-1  | GSM4626769 | OA |
| GSM4626769_CGAGAAGTCTGACCTC-1  | GSM4626769 | OA |
| GSM4626769_CGAGCACAGAAACCTA-1  | GSM4626769 | OA |
| GSM4626769_CGAGCACAGACGCACA-1  | GSM4626769 | OA |
| GSM4626769_CGAGCACCATGCCCGA-1  | GSM4626769 | OA |
| GSM4626769_CGAGCACGTCGTCTTC-1  | GSM4626769 | OA |
| GSM4626769_CGAGCCAAGAGCAATT-1  | GSM4626769 | OA |
| GSM4626769_CGAGCCACATTCTGC-1   | GSM4626769 | OA |
| GSM4626769_CGAGCCAGTTAAAGAC-1  | GSM4626769 | OA |
| GSM4626769_CGATCGGAGATAGGAG-1  | GSM4626769 | OA |
| GSM4626769_CGATCGGAGTTATCGC-1  | GSM4626769 | OA |
| GSM4626769_CGATCGGTCAGTGCAT-1  | GSM4626769 | OA |
| GSM4626769_CGATCGGTCGTGACAT-1  | GSM4626769 | OA |
| GSM4626769_CGATGGCAGGCATGGT-1  | GSM4626769 | OA |
| GSM4626769_CGATGGCAGTGCTGCC-1  | GSM4626769 | OA |
| GSM4626769_CGATGGCCAACTGCTA-1  | GSM4626769 | OA |
| GSM4626769_CGATGGCCAGTAGAGC-1  | GSM4626769 | OA |
| GSM4626769_CGATGGCGTACCGTTA-1  | GSM4626769 | OA |
| GSM4626769_CGATGGCTCTTTCCTC-1  | GSM4626769 | OA |
| GSM4626769_CGATGTAAGGCTAGAC-1  | GSM4626769 | OA |
| GSM4626769_CGATGTAGTAGAGCTG-1  | GSM4626769 | OA |
| GSM4626769_CGATGTAGTCCAGTTA-1  | GSM4626769 | OA |
| GSM4626769_CGATGTAGTGTGTTGTG-1 | GSM4626769 | OA |



|                               |            |    |
|-------------------------------|------------|----|
| GSM4626769_CGATGTATCCTGTACC-1 | GSM4626769 | OA |
| GSM4626769_CGATGTATCGAATCCA-1 | GSM4626769 | OA |
| GSM4626769_CGATTGAAGAATAGGG-1 | GSM4626769 | OA |
| GSM4626769_CGATTGAAGCCGATTT-1 | GSM4626769 | OA |
| GSM4626769_CGATTGACAGGACCCT-1 | GSM4626769 | OA |
| GSM4626769_CGATTGACATCTACGA-1 | GSM4626769 | OA |
| GSM4626769_CGATTGAGTAGCGTGA-1 | GSM4626769 | OA |
| GSM4626769_CGATTGAGTCATATCG-1 | GSM4626769 | OA |
| GSM4626769_CGATTGAGTCTTCTCG-1 | GSM4626769 | OA |
| GSM4626769_CGATTGAGTGAAGGCT-1 | GSM4626769 | OA |
| GSM4626769_CGCCAAGAGATGTAAC-1 | GSM4626769 | OA |
| GSM4626769_CGCCAAGGTCTTGCGG-1 | GSM4626769 | OA |
| GSM4626769_CGCCAAGGTTAAGAAC-1 | GSM4626769 | OA |
| GSM4626769_CGCCAAGTCACTTACT-1 | GSM4626769 | OA |
| GSM4626769_CGCCAAGTCGTCCAGG-1 | GSM4626769 | OA |
| GSM4626769_CGCGGTAGTCAGCTAT-1 | GSM4626769 | OA |
| GSM4626769_CGCGGTAGTGTTCTTT-1 | GSM4626769 | OA |
| GSM4626769_CGCGGTATCCTCTAGC-1 | GSM4626769 | OA |
| GSM4626769_CGCGTTTAGATCCTGT-1 | GSM4626769 | OA |
| GSM4626769_CGCGTTTAGCCAGTAG-1 | GSM4626769 | OA |
| GSM4626769_CGCGTTTGTGAGCTAT-1 | GSM4626769 | OA |
| GSM4626769_CGCGTTTTCTTGTATC-1 | GSM4626769 | OA |
| GSM4626769_CGCTATCAGATGGGTC-1 | GSM4626769 | OA |
| GSM4626769_CGCTATCCAATCTGCA-1 | GSM4626769 | OA |
| GSM4626769_CGCTATCCACTCTGTC-1 | GSM4626769 | OA |
| GSM4626769_CGCTATCTCCTGCCAT-1 | GSM4626769 | OA |
| GSM4626769_CGCTATCTCGGAGGTA-1 | GSM4626769 | OA |
| GSM4626769_CGCTGGAGTAGCTGCC-1 | GSM4626769 | OA |
| GSM4626769_CGCTGGAGTTTGTTTC-1 | GSM4626769 | OA |
| GSM4626769_CGCTGGATCAACGCTA-1 | GSM4626769 | OA |
| GSM4626769_CGCTGGATCACCAGGC-1 | GSM4626769 | OA |
| GSM4626769_CGCTGGATCGGAGCAA-1 | GSM4626769 | OA |
| GSM4626769_CGCTGGATCGGTAAAC-1 | GSM4626769 | OA |
| GSM4626769_CGCTTCAAGGCAAAGA-1 | GSM4626769 | OA |
| GSM4626769_CGCTTCACACGAAACG-1 | GSM4626769 | OA |
| GSM4626769_CGCTTCAGTAGGACAC-1 | GSM4626769 | OA |
| GSM4626769_CGCTTCAGTTATTCTC-1 | GSM4626769 | OA |
| GSM4626769_CGGACACCAAATCCGT-1 | GSM4626769 | OA |
| GSM4626769_CGGACACCAATGAATG-1 | GSM4626769 | OA |
| GSM4626769_CGGACACCACATGGGA-1 | GSM4626769 | OA |
| GSM4626769_CGGACACGTCCGACGT-1 | GSM4626769 | OA |
| GSM4626769_CGGACACTCATGTCCC-1 | GSM4626769 | OA |
| GSM4626769_CGGACACTCCGTAGTA-1 | GSM4626769 | OA |
| GSM4626769_CGGACGTAGAAGAAGC-1 | GSM4626769 | OA |
| GSM4626769_CGGACGTAGCTAACAA-1 | GSM4626769 | OA |
| GSM4626769_CGGACGTCAATGTTGC-1 | GSM4626769 | OA |
| GSM4626769_CGGACGTACGACGAA-1  | GSM4626769 | OA |
| GSM4626769_CGGACGTGTGATGCC-1  | GSM4626769 | OA |
| GSM4626769_CGGACGTGTGTTAAGA-1 | GSM4626769 | OA |
| GSM4626769_CGGACGTTCACCATAG-1 | GSM4626769 | OA |
| GSM4626769_CGGACGTTCATATCGG-1 | GSM4626769 | OA |
| GSM4626769_CGGACGTTCOAAGCCG-1 | GSM4626769 | OA |
| GSM4626769_CGGACGTTCGGTGTTA-1 | GSM4626769 | OA |
| GSM4626769_CGGACGTTCACCTGC-1  | GSM4626769 | OA |
| GSM4626769_CGGACTGAGTACGCC-1  | GSM4626769 | OA |
| GSM4626769_CGGACTGAGTGTGGCA-1 | GSM4626769 | OA |
| GSM4626769_CGGACTGCAGTGGAGT-1 | GSM4626769 | OA |

|                                |            |    |
|--------------------------------|------------|----|
| GSM4626769_CGGACTGGTAAATGAC-1  | GSM4626769 | OA |
| GSM4626769_CGGACTGGTCTTGTCC-1  | GSM4626769 | OA |
| GSM4626769_CGGACTGTCTGGTTCC-1  | GSM4626769 | OA |
| GSM4626769_CGGAGCTCAGGTGGAT-1  | GSM4626769 | OA |
| GSM4626769_CGGAGCTGTACTTCTT-1  | GSM4626769 | OA |
| GSM4626769_CGGAGCTTCTTTAGTC-1  | GSM4626769 | OA |
| GSM4626769_CGGAGTCAGCTTCGCG-1  | GSM4626769 | OA |
| GSM4626769_CGGAGTCAGTGCCAGA-1  | GSM4626769 | OA |
| GSM4626769_CGGAGTCCAAATCCGT-1  | GSM4626769 | OA |
| GSM4626769_CGGAGTCTCTTTACAC-1  | GSM4626769 | OA |
| GSM4626769_CGGCTAGCAATGAAAC-1  | GSM4626769 | OA |
| GSM4626769_CGGCTAGCATTGGTAC-1  | GSM4626769 | OA |
| GSM4626769_CGGCTAGGTCTTCTCG-1  | GSM4626769 | OA |
| GSM4626769_CGGCTAGTCAAGGTAA-1  | GSM4626769 | OA |
| GSM4626769_CGGCTAGTCGTGGACC-1  | GSM4626769 | OA |
| GSM4626769_CGGGTCAAGAGCAATT-1  | GSM4626769 | OA |
| GSM4626769_CGGGTCAAGAGCTATA-1  | GSM4626769 | OA |
| GSM4626769_CGGGTCAAGCCTTGAT-1  | GSM4626769 | OA |
| GSM4626769_CGGGTCAAGTAGCGGT-1  | GSM4626769 | OA |
| GSM4626769_CGGGTCACAAGGGTCA-1  | GSM4626769 | OA |
| GSM4626769_CGGGTCAGTTAAGGGC-1  | GSM4626769 | OA |
| GSM4626769_CGGTTAACAATGAAAC-1  | GSM4626769 | OA |
| GSM4626769_CGGTTAAGTGAACCTT-1  | GSM4626769 | OA |
| GSM4626769_CGGTTAAGTGTTCTTT-1  | GSM4626769 | OA |
| GSM4626769_CGGTTAAGTTCCCGAG-1  | GSM4626769 | OA |
| GSM4626769_CGGTTAATCAACCATG-1  | GSM4626769 | OA |
| GSM4626769_CGTAGCGAGACAAGCC-1  | GSM4626769 | OA |
| GSM4626769_CGTAGCGAGGTGCACA-1  | GSM4626769 | OA |
| GSM4626769_CGTAGCGAGGTGCTAG-1  | GSM4626769 | OA |
| GSM4626769_CGTAGCGCAAGCCTAT-1  | GSM4626769 | OA |
| GSM4626769_CGTAGCGCACCCAGTG-1  | GSM4626769 | OA |
| GSM4626769_CGTAGCGCAGTTAACC-1  | GSM4626769 | OA |
| GSM4626769_CGTAGCGCATACTCTT-1  | GSM4626769 | OA |
| GSM4626769_CGTAGCGGTAGTGAAT-1  | GSM4626769 | OA |
| GSM4626769_CGTAGCGGTGCGACTGC-1 | GSM4626769 | OA |
| GSM4626769_CGTAGGCAGGCATGGT-1  | GSM4626769 | OA |
| GSM4626769_CGTAGGCAGGTACTCT-1  | GSM4626769 | OA |
| GSM4626769_CGTAGGCCAACGATCT-1  | GSM4626769 | OA |
| GSM4626769_CGTAGGCCAGGACGTA-1  | GSM4626769 | OA |
| GSM4626769_CGTAGGCCAGTCGATT-1  | GSM4626769 | OA |
| GSM4626769_CGTAGGCCATACTACG-1  | GSM4626769 | OA |
| GSM4626769_CGTAGGCCGTAGCGTAG-1 | GSM4626769 | OA |
| GSM4626769_CGTAGGCCGTCACCCAG-1 | GSM4626769 | OA |
| GSM4626769_CGTAGGCTCCACGACG-1  | GSM4626769 | OA |
| GSM4626769_CGTAGGCTCTCCTATA-1  | GSM4626769 | OA |
| GSM4626769_CGTCACTAGGACACCA-1  | GSM4626769 | OA |
| GSM4626769_CGTCACTCAAATTGCC-1  | GSM4626769 | OA |
| GSM4626769_CGTCACTCACTCAGGC-1  | GSM4626769 | OA |
| GSM4626769_CGTCACTCATAGAAAC-1  | GSM4626769 | OA |
| GSM4626769_CGTCACTCATATACGC-1  | GSM4626769 | OA |
| GSM4626769_CGTCACTGTAGAGCTG-1  | GSM4626769 | OA |
| GSM4626769_CGTCACTGTGTGGCTC-1  | GSM4626769 | OA |
| GSM4626769_CGTCAGGAGAATTCCC-1  | GSM4626769 | OA |
| GSM4626769_CGTCAGGAGAGGGCTT-1  | GSM4626769 | OA |
| GSM4626769_CGTCAGGAGCGATTCT-1  | GSM4626769 | OA |
| GSM4626769_CGTCAGGAGGTCATCT-1  | GSM4626769 | OA |
| GSM4626769_CGTCAGGCATCCGTGG-1  | GSM4626769 | OA |

|                                |            |    |
|--------------------------------|------------|----|
| GSM4626769_CGTCAGGGTAGCGCTC-1  | GSM4626769 | OA |
| GSM4626769_CGTCAGGGTATCAGTC-1  | GSM4626769 | OA |
| GSM4626769_CGTCAGGGTGGTTTCA-1  | GSM4626769 | OA |
| GSM4626769_CGTCAGGGTTGTTTGG-1  | GSM4626769 | OA |
| GSM4626769_CGTCAGGTCGAATGGG-1  | GSM4626769 | OA |
| GSM4626769_CGTCAGGTCTCCTATA-1  | GSM4626769 | OA |
| GSM4626769_CGTCAGGTCTTGAGAC-1  | GSM4626769 | OA |
| GSM4626769_CGTCCATAGAGCTATA-1  | GSM4626769 | OA |
| GSM4626769_CGTCCATAGCCCAGCT-1  | GSM4626769 | OA |
| GSM4626769_CGTCCATCATGGTCAT-1  | GSM4626769 | OA |
| GSM4626769_CGTCCATGTGCCTTGG-1  | GSM4626769 | OA |
| GSM4626769_CGTCCATTTCGGTTAAC-1 | GSM4626769 | OA |
| GSM4626769_CGTCCATTCTGCTTGC-1  | GSM4626769 | OA |
| GSM4626769_CGTCTACAGACTTGAA-1  | GSM4626769 | OA |
| GSM4626769_CGTCTACAGGCACATG-1  | GSM4626769 | OA |
| GSM4626769_CGTCTACAGGCATTGG-1  | GSM4626769 | OA |
| GSM4626769_CGTCTACCATATACCG-1  | GSM4626769 | OA |
| GSM4626769_CGTCTACGTACACCGC-1  | GSM4626769 | OA |
| GSM4626769_CGTCTACGTCTACCTC-1  | GSM4626769 | OA |
| GSM4626769_CGTCTACGTTACAGAA-1  | GSM4626769 | OA |
| GSM4626769_CGTCTACTCACCCCTCA-1 | GSM4626769 | OA |
| GSM4626769_CGTCTACTCGAATGGG-1  | GSM4626769 | OA |
| GSM4626769_CGTGAGCAGAGACGAA-1  | GSM4626769 | OA |
| GSM4626769_CGTGAGCAGAGTCGGT-1  | GSM4626769 | OA |
| GSM4626769_CGTGAGCAGAGTCTGG-1  | GSM4626769 | OA |
| GSM4626769_CGTGAGCAGGCATTGG-1  | GSM4626769 | OA |
| GSM4626769_CGTGAGCAGTCGCCGT-1  | GSM4626769 | OA |
| GSM4626769_CGTGAGCTCTGTCTAT-1  | GSM4626769 | OA |
| GSM4626769_CGTGTAAAGAGACTTA-1  | GSM4626769 | OA |
| GSM4626769_CGTGTAAAGAGCAATT-1  | GSM4626769 | OA |
| GSM4626769_CGTGTAAAGATAGCAT-1  | GSM4626769 | OA |
| GSM4626769_CGTGTAAACAATCGAAA-1 | GSM4626769 | OA |
| GSM4626769_CGTGTAAACACGGCCAT-1 | GSM4626769 | OA |
| GSM4626769_CGTGTAAACAGGTGCCT-1 | GSM4626769 | OA |
| GSM4626769_CGTGTAAAGTCAGCTAT-1 | GSM4626769 | OA |
| GSM4626769_CGTGTAAATCCGATATG-1 | GSM4626769 | OA |
| GSM4626769_CGTGTAAATCTATCCCG-1 | GSM4626769 | OA |
| GSM4626769_CGTGTCTAGAGACGAA-1  | GSM4626769 | OA |
| GSM4626769_CGTGTCTAGGGCTTGA-1  | GSM4626769 | OA |
| GSM4626769_CGTGTCTAGTAGCCGA-1  | GSM4626769 | OA |
| GSM4626769_CGTGTCTCATGGGAAC-1  | GSM4626769 | OA |
| GSM4626769_CGTGTCTGTCAGAGGT-1  | GSM4626769 | OA |
| GSM4626769_CGTGTCTGTCTCCATC-1  | GSM4626769 | OA |
| GSM4626769_CGTTAGACACCACGTG-1  | GSM4626769 | OA |
| GSM4626769_CGTTAGAGTCAATGTC-1  | GSM4626769 | OA |
| GSM4626769_CGTTAGATCTATCCTA-1  | GSM4626769 | OA |
| GSM4626769_CGTTCTGAGGAGTTGC-1  | GSM4626769 | OA |
| GSM4626769_CGTTCTGAGGCTAGAC-1  | GSM4626769 | OA |
| GSM4626769_CGTTCTGCAATGTTGC-1  | GSM4626769 | OA |
| GSM4626769_CGTTCTGCACAACGTT-1  | GSM4626769 | OA |
| GSM4626769_CGTTCTGCACGTCAGC-1  | GSM4626769 | OA |
| GSM4626769_CGTTCTGCATGTCTCC-1  | GSM4626769 | OA |
| GSM4626769_CGTTCTGGTCCTCTTG-1  | GSM4626769 | OA |
| GSM4626769_CGTTGGGAGATATACG-1  | GSM4626769 | OA |
| GSM4626769_CGTTGGGCACCGATAT-1  | GSM4626769 | OA |
| GSM4626769_CGTTGGGGTCCTCTTG-1  | GSM4626769 | OA |
| GSM4626769_CGTTGGGGTGATGTGG-1  | GSM4626769 | OA |

|                                |            |    |
|--------------------------------|------------|----|
| GSM4626769_CGTTGGGTCGCGCCAA-1  | GSM4626769 | OA |
| GSM4626769_CGTTGGGTCGTCCGTT-1  | GSM4626769 | OA |
| GSM4626769_CTAACCTAGCGACGTA-1  | GSM4626769 | OA |
| GSM4626769_CTAACCTAGGGCACTA-1  | GSM4626769 | OA |
| GSM4626769_CTAACCTGTAGTAGTA-1  | GSM4626769 | OA |
| GSM4626769_CTAACCTGTGCATATCG-1 | GSM4626769 | OA |
| GSM4626769_CTAACCTTCCCTCAGT-1  | GSM4626769 | OA |
| GSM4626769_CTAACCTTTCGGAGGTA-1 | GSM4626769 | OA |
| GSM4626769_CTAACCTTCTATCCTA-1  | GSM4626769 | OA |
| GSM4626769_CTAAGACCAATGAATG-1  | GSM4626769 | OA |
| GSM4626769_CTAAGACGTAAAGGAG-1  | GSM4626769 | OA |
| GSM4626769_CTAAGACGTCCAGTTA-1  | GSM4626769 | OA |
| GSM4626769_CTAAGACTCTCTGAGA-1  | GSM4626769 | OA |
| GSM4626769_CTAAGACTCTTTAGTC-1  | GSM4626769 | OA |
| GSM4626769_CTAATGGCAGTCTTCC-1  | GSM4626769 | OA |
| GSM4626769_CTAATGGCATCGGACC-1  | GSM4626769 | OA |
| GSM4626769_CTAATGGGTACGACCC-1  | GSM4626769 | OA |
| GSM4626769_CTAATGGGTGGCTCCA-1  | GSM4626769 | OA |
| GSM4626769_CTACACCAGCAAATCA-1  | GSM4626769 | OA |
| GSM4626769_CTACACCAGTACGTTC-1  | GSM4626769 | OA |
| GSM4626769_CTACACCAGTGAACGC-1  | GSM4626769 | OA |
| GSM4626769_CTACACCTCAACGCTA-1  | GSM4626769 | OA |
| GSM4626769_CTACACCTCCTACAGA-1  | GSM4626769 | OA |
| GSM4626769_CTACATTAGGCTCATT-1  | GSM4626769 | OA |
| GSM4626769_CTACATTCAACGCACC-1  | GSM4626769 | OA |
| GSM4626769_CTACATTCAATAACGA-1  | GSM4626769 | OA |
| GSM4626769_CTACATTGTTCATCGGC-1 | GSM4626769 | OA |
| GSM4626769_CTACATTGTCTAGGTT-1  | GSM4626769 | OA |
| GSM4626769_CTACATTTCAAAACC-1   | GSM4626769 | OA |
| GSM4626769_CTACCCAAGATCACGG-1  | GSM4626769 | OA |
| GSM4626769_CTACCCAAGGAGCGAG-1  | GSM4626769 | OA |
| GSM4626769_CTACCCAAGTGGCACA-1  | GSM4626769 | OA |
| GSM4626769_CTACCCACACATGTGT-1  | GSM4626769 | OA |
| GSM4626769_CTACCCACACGACTCG-1  | GSM4626769 | OA |
| GSM4626769_CTACCCACAGTTTTCA-1  | GSM4626769 | OA |
| GSM4626769_CTACCCAGTACCAGTT-1  | GSM4626769 | OA |
| GSM4626769_CTACCCATCGGAGGTA-1  | GSM4626769 | OA |
| GSM4626769_CTACGTCAGTGGAGAA-1  | GSM4626769 | OA |
| GSM4626769_CTACGTCCAATAGCAA-1  | GSM4626769 | OA |
| GSM4626769_CTACGTCTCACGCATA-1  | GSM4626769 | OA |
| GSM4626769_CTAGAGTAGAGATGAG-1  | GSM4626769 | OA |
| GSM4626769_CTAGAGTAGTTTCGATC-1 | GSM4626769 | OA |
| GSM4626769_CTAGAGTCACCGAAAG-1  | GSM4626769 | OA |
| GSM4626769_CTAGAGTCATTCCTGC-1  | GSM4626769 | OA |
| GSM4626769_CTAGAGTGTAGAGGAA-1  | GSM4626769 | OA |
| GSM4626769_CTAGCCTAGCTGCAAG-1  | GSM4626769 | OA |
| GSM4626769_CTAGCCTCATCCTAGA-1  | GSM4626769 | OA |
| GSM4626769_CTAGCCTGTCCTAGCG-1  | GSM4626769 | OA |
| GSM4626769_CTAGCCTGTTATTCTC-1  | GSM4626769 | OA |
| GSM4626769_CTAGCCTTCCAATGGT-1  | GSM4626769 | OA |
| GSM4626769_CTAGTGACAAGTCATC-1  | GSM4626769 | OA |
| GSM4626769_CTAGTGACAGTGGGAT-1  | GSM4626769 | OA |
| GSM4626769_CTCACACAGGTGACCA-1  | GSM4626769 | OA |
| GSM4626769_CTCACACCAAGGACAC-1  | GSM4626769 | OA |
| GSM4626769_CTCACACCACATGACT-1  | GSM4626769 | OA |
| GSM4626769_CTCAGAAAGCACCGCT-1  | GSM4626769 | OA |
| GSM4626769_CTCAGAAAGTCCAGGA-1  | GSM4626769 | OA |

|                                 |            |    |
|---------------------------------|------------|----|
| GSM4626769_CTCAGAACACGCCAGT-1   | GSM4626769 | OA |
| GSM4626769_CTCAGAAGTCTTGTCC-1   | GSM4626769 | OA |
| GSM4626769_CTCAGAAGTGTCGCTG-1   | GSM4626769 | OA |
| GSM4626769_CTCAGAATCATGGTCA-1   | GSM4626769 | OA |
| GSM4626769_CTCATTAAGACTACAA-1   | GSM4626769 | OA |
| GSM4626769_CTCATTAAGCCATCGC-1   | GSM4626769 | OA |
| GSM4626769_CTCATTAAGGGAACGG-1   | GSM4626769 | OA |
| GSM4626769_CTCATTAAGTTGTCGT-1   | GSM4626769 | OA |
| GSM4626769_CTCATTACAAGTCATC-1   | GSM4626769 | OA |
| GSM4626769_CTCATTACATATACCG-1   | GSM4626769 | OA |
| GSM4626769_CTCATTAGTTGAACTC-1   | GSM4626769 | OA |
| GSM4626769_CTCATTATCAGGCAAG-1   | GSM4626769 | OA |
| GSM4626769_CTCCTAGAGGCTACGA-1   | GSM4626769 | OA |
| GSM4626769_CTCCTAGGTAATCGTC-1   | GSM4626769 | OA |
| GSM4626769_CTCCTAGGTGAGGCTA-1   | GSM4626769 | OA |
| GSM4626769_CTCCTAGTCGAACTGT-1   | GSM4626769 | OA |
| GSM4626769_CTCGAAAAGAAAGTGG-1   | GSM4626769 | OA |
| GSM4626769_CTCGAAAAGTCAAGCG-1   | GSM4626769 | OA |
| GSM4626769_CTCGAAAACAAGTAGTA-1  | GSM4626769 | OA |
| GSM4626769_CTCGAAAACAGATGAGC-1  | GSM4626769 | OA |
| GSM4626769_CTCGAAAAGTCTAGGTT-1  | GSM4626769 | OA |
| GSM4626769_CTCGAAAAGTGGCAAAC-1  | GSM4626769 | OA |
| GSM4626769_CTCGAAAAGTTGATTGC-1  | GSM4626769 | OA |
| GSM4626769_CTCGAAATCCAGGGCT-1   | GSM4626769 | OA |
| GSM4626769_CTCGAAATCGAACGGA-1   | GSM4626769 | OA |
| GSM4626769_CTCGAAATCGGCATCG-1   | GSM4626769 | OA |
| GSM4626769_CTCGAGGCAGCCTTGG-1   | GSM4626769 | OA |
| GSM4626769_CTCGAGGGTACTCTCC-1   | GSM4626769 | OA |
| GSM4626769_CTCGAGGTCTCCAGGG-1   | GSM4626769 | OA |
| GSM4626769_CTCGGAGCACGGACAA-1   | GSM4626769 | OA |
| GSM4626769_CTCGGAGCATGCTGGC-1   | GSM4626769 | OA |
| GSM4626769_CTCGGAGTCACAATGC-1   | GSM4626769 | OA |
| GSM4626769_CTCGGAGTCTCAAACG-1   | GSM4626769 | OA |
| GSM4626769_CTCGGGAAGATGTGTA-1   | GSM4626769 | OA |
| GSM4626769_CTCGGGACAACACTGCGC-1 | GSM4626769 | OA |
| GSM4626769_CTCGGGACAAGCGATG-1   | GSM4626769 | OA |
| GSM4626769_CTCGTACAGGTGCAAC-1   | GSM4626769 | OA |
| GSM4626769_CTCGTACAGTGGAGTC-1   | GSM4626769 | OA |
| GSM4626769_CTCGTACCAAAGGTGC-1   | GSM4626769 | OA |
| GSM4626769_CTCGTACCATCTCCCA-1   | GSM4626769 | OA |
| GSM4626769_CTCGTACCATTCACTT-1   | GSM4626769 | OA |
| GSM4626769_CTCGTACTCATGCAAC-1   | GSM4626769 | OA |
| GSM4626769_CTCGTACTCGATAGAA-1   | GSM4626769 | OA |
| GSM4626769_CTCGTACTCTTGACGA-1   | GSM4626769 | OA |
| GSM4626769_CTCGTCAAGACGCAAC-1   | GSM4626769 | OA |
| GSM4626769_CTCGTCAAGGGCTTCC-1   | GSM4626769 | OA |
| GSM4626769_CTCGTACACAGACTT-1    | GSM4626769 | OA |
| GSM4626769_CTCGTACAGTCATCCCT-1  | GSM4626769 | OA |
| GSM4626769_CTCGTACAGTTCCAACA-1  | GSM4626769 | OA |
| GSM4626769_CTCGTACATCCCGATG-1   | GSM4626769 | OA |
| GSM4626769_CTCTAATCATACTCTT-1   | GSM4626769 | OA |
| GSM4626769_CTCTAATTCTGTCAAG-1   | GSM4626769 | OA |
| GSM4626769_CTCTACGAGATATGCA-1   | GSM4626769 | OA |
| GSM4626769_CTCTACGAGATGTCGG-1   | GSM4626769 | OA |
| GSM4626769_CTCTACGAGTCAAGCG-1   | GSM4626769 | OA |
| GSM4626769_CTCTACGCAGGATCGA-1   | GSM4626769 | OA |
| GSM4626769_CTCTACGGTAAGGGCT-1   | GSM4626769 | OA |

|                                 |            |    |
|---------------------------------|------------|----|
| GSM4626769_CTCTACGTCCTCCTAG-1   | GSM4626769 | OA |
| GSM4626769_CTCTGGTAGACGCACA-1   | GSM4626769 | OA |
| GSM4626769_CTCTGGTAGTATCTCG-1   | GSM4626769 | OA |
| GSM4626769_CTCTGGTCACACCGAC-1   | GSM4626769 | OA |
| GSM4626769_CTCTGGTGTCTACCTC-1   | GSM4626769 | OA |
| GSM4626769_CTCTGGTGTGCAGGTA-1   | GSM4626769 | OA |
| GSM4626769_CTCTGGTGTGGACGAT-1   | GSM4626769 | OA |
| GSM4626769_CTCTGGTTCCTAATT-1    | GSM4626769 | OA |
| GSM4626769_CTCTGGTTCGGCATCG-1   | GSM4626769 | OA |
| GSM4626769_CTCTGGTTCGTCCAGG-1   | GSM4626769 | OA |
| GSM4626769_CTGAAACAGTCCGTAT-1   | GSM4626769 | OA |
| GSM4626769_CTGAAACCAAAGTCT-1    | GSM4626769 | OA |
| GSM4626769_CTGAAACGTAATAGCA-1   | GSM4626769 | OA |
| GSM4626769_CTGAAACTCCTACAGA-1   | GSM4626769 | OA |
| GSM4626769_CTGAAGTCAATAGCAA-1   | GSM4626769 | OA |
| GSM4626769_CTGAAGTGTTCTGTGAT-1  | GSM4626769 | OA |
| GSM4626769_CTGAAGTTC AACACTG-1  | GSM4626769 | OA |
| GSM4626769_CTGAAGTTC CGAACGC-1  | GSM4626769 | OA |
| GSM4626769_CTGAAGTTCCTTGGTC-1   | GSM4626769 | OA |
| GSM4626769_CTGAAGTTC TGCGTG-1   | GSM4626769 | OA |
| GSM4626769_CTGAAGTTC TACC GC-1  | GSM4626769 | OA |
| GSM4626769_CTGATAGAGCAAATCA-1   | GSM4626769 | OA |
| GSM4626769_CTGATAGAGTACGTTT-1   | GSM4626769 | OA |
| GSM4626769_CTGATAGAGTCATCCA-1   | GSM4626769 | OA |
| GSM4626769_CTGATAGCAAAGCAAT-1   | GSM4626769 | OA |
| GSM4626769_CTGATAGCAAGTACCT-1   | GSM4626769 | OA |
| GSM4626769_CTGATAGCACCATGTA-1   | GSM4626769 | OA |
| GSM4626769_CTGATAGGTATAGGTA-1   | GSM4626769 | OA |
| GSM4626769_CTGATAGGT C GGCTCA-1 | GSM4626769 | OA |
| GSM4626769_CTGATAGTCGTCCAGG-1   | GSM4626769 | OA |
| GSM4626769_CTGATCCTCGGTGTCTG-1  | GSM4626769 | OA |
| GSM4626769_CTGCCTAAGAAAGTGG-1   | GSM4626769 | OA |
| GSM4626769_CTGCCTAAGATGGGTC-1   | GSM4626769 | OA |
| GSM4626769_CTGCCTAAGCGTTCCG-1   | GSM4626769 | OA |
| GSM4626769_CTGCCTACAGGTTTCA-1   | GSM4626769 | OA |
| GSM4626769_CTGCCTACATGCATGT-1   | GSM4626769 | OA |
| GSM4626769_CTGCCTAGTAAATGTG-1   | GSM4626769 | OA |
| GSM4626769_CTGCCTAGTTTCAATC-1   | GSM4626769 | OA |
| GSM4626769_CTGCCTATCCTCAACC-1   | GSM4626769 | OA |
| GSM4626769_CTGCCTATCGCAAGCC-1   | GSM4626769 | OA |
| GSM4626769_CTGCCTATCGTATCAG-1   | GSM4626769 | OA |
| GSM4626769_CTGCCTATCTCGATGA-1   | GSM4626769 | OA |
| GSM4626769_CTGCCTATCTTTACGT-1   | GSM4626769 | OA |
| GSM4626769_CTGC CGGAAGACGCACA-1 | GSM4626769 | OA |
| GSM4626769_CTGC CGGAAGGACTGGT-1 | GSM4626769 | OA |
| GSM4626769_CTGC CGGAAGTCCGTAT-1 | GSM4626769 | OA |
| GSM4626769_CTGC CGGAAGTGTCCCG-1 | GSM4626769 | OA |
| GSM4626769_CTGC CGGAGTCCGACGT-1 | GSM4626769 | OA |
| GSM4626769_CTGCTGTAGACAAGCC-1   | GSM4626769 | OA |
| GSM4626769_CTGCTGTAGGTAGCTG-1   | GSM4626769 | OA |
| GSM4626769_CTGCTGTCAACGATCT-1   | GSM4626769 | OA |
| GSM4626769_CTGCTGTACCACGTG-1    | GSM4626769 | OA |
| GSM4626769_CTGCTGT CAGCATACT-1  | GSM4626769 | OA |
| GSM4626769_CTGCTGT CAGCCACCA-1  | GSM4626769 | OA |
| GSM4626769_CTGCTGTGTCCCGACA-1   | GSM4626769 | OA |
| GSM4626769_CTGGTCTAGCCACTAT-1   | GSM4626769 | OA |
| GSM4626769_CTGGTCTAGGACAGAA-1   | GSM4626769 | OA |

|                                |            |    |
|--------------------------------|------------|----|
| GSM4626769_CTGGTCTCACGCTTTC-1  | GSM4626769 | OA |
| GSM4626769_CTGGTCTTCAGGCAAG-1  | GSM4626769 | OA |
| GSM4626769_CTGGTCTTCCGAGCCA-1  | GSM4626769 | OA |
| GSM4626769_CTGGTCTTCTCTGAGA-1  | GSM4626769 | OA |
| GSM4626769_CTGTGCTAGATGGGTC-1  | GSM4626769 | OA |
| GSM4626769_CTGTGCTAGTCGATAA-1  | GSM4626769 | OA |
| GSM4626769_CTGTGCTCACATGTGT-1  | GSM4626769 | OA |
| GSM4626769_CTGTGCTCACGGCTAC-1  | GSM4626769 | OA |
| GSM4626769_CTGTTTAAGCGAAGGG-1  | GSM4626769 | OA |
| GSM4626769_CTGTTTAAGGCCGAAT-1  | GSM4626769 | OA |
| GSM4626769_CTGTTTACATGCAATC-1  | GSM4626769 | OA |
| GSM4626769_CTGTTTAGTATCACCA-1  | GSM4626769 | OA |
| GSM4626769_CTGTTTAGTCGCGGTT-1  | GSM4626769 | OA |
| GSM4626769_CTGTTTAGTGGTACAG-1  | GSM4626769 | OA |
| GSM4626769_CTGTTTATCCTTCAAT-1  | GSM4626769 | OA |
| GSM4626769_CTTAACTAGGCTCAGA-1  | GSM4626769 | OA |
| GSM4626769_CTTAACTAGTGTGGCA-1  | GSM4626769 | OA |
| GSM4626769_CTTAACTGTCACCTAA-1  | GSM4626769 | OA |
| GSM4626769_CTTAACTTCAACGAAA-1  | GSM4626769 | OA |
| GSM4626769_CTTAACTTACCTTAT-1   | GSM4626769 | OA |
| GSM4626769_CTTACCGCAAGCCTAT-1  | GSM4626769 | OA |
| GSM4626769_CTTACCGCAGTTCCCT-1  | GSM4626769 | OA |
| GSM4626769_CTTACCGTCATGTGGT-1  | GSM4626769 | OA |
| GSM4626769_CTTACCGTCTCTGAGA-1  | GSM4626769 | OA |
| GSM4626769_CTTACCGTCTGAAAGA-1  | GSM4626769 | OA |
| GSM4626769_CTTAGGAAGAAGGGTA-1  | GSM4626769 | OA |
| GSM4626769_CTTAGGAAGACTAGAT-1  | GSM4626769 | OA |
| GSM4626769_CTTAGGAAGCAACGGT-1  | GSM4626769 | OA |
| GSM4626769_CTTCTCTAGTACTTGC-1  | GSM4626769 | OA |
| GSM4626769_CTTCTCTCAAGCCATT-1  | GSM4626769 | OA |
| GSM4626769_CTTCTCTGTAAGTGTA-1  | GSM4626769 | OA |
| GSM4626769_CTTCTCTGTGCACTTA-1  | GSM4626769 | OA |
| GSM4626769_CTTCTCTGTTCTGAAC-1  | GSM4626769 | OA |
| GSM4626769_CTTCTCTTCAACGAAA-1  | GSM4626769 | OA |
| GSM4626769_CTTCTCTTCAATTGCGA-1 | GSM4626769 | OA |
| GSM4626769_CTTGGCTAGACAGAGA-1  | GSM4626769 | OA |
| GSM4626769_CTTGGCTAGAGCCCAA-1  | GSM4626769 | OA |
| GSM4626769_CTTGGCTAGCGTCAAG-1  | GSM4626769 | OA |
| GSM4626769_CTTGGCTCATACCATG-1  | GSM4626769 | OA |
| GSM4626769_CTTGGCTGTGGGTATG-1  | GSM4626769 | OA |
| GSM4626769_CTTGGCTTCTCGAGTA-1  | GSM4626769 | OA |
| GSM4626769_CTTTGCGCAAACGCT-1   | GSM4626769 | OA |
| GSM4626769_CTTTGCGCACACGAC-1   | GSM4626769 | OA |
| GSM4626769_CTTTGCGCATCACGAT-1  | GSM4626769 | OA |
| GSM4626769_CTTTGCGGTGCGGTAA-1  | GSM4626769 | OA |
| GSM4626769_CTTTGCGTCTGAGGGA-1  | GSM4626769 | OA |
| GSM4626769_GAAACTCAGCCACGCT-1  | GSM4626769 | OA |
| GSM4626769_GAAACTCAGGACACCA-1  | GSM4626769 | OA |
| GSM4626769_GAAACTCGTGAGCGAT-1  | GSM4626769 | OA |
| GSM4626769_GAAACTCTCCATTTA-1   | GSM4626769 | OA |
| GSM4626769_GAAATGAAGAAACCGC-1  | GSM4626769 | OA |
| GSM4626769_GAAATGAAGTTTCGCAT-1 | GSM4626769 | OA |
| GSM4626769_GAAATGACAAGTTAAG-1  | GSM4626769 | OA |
| GSM4626769_GAAATGACAGGGATTG-1  | GSM4626769 | OA |
| GSM4626769_GAAATGACATCTCGCT-1  | GSM4626769 | OA |
| GSM4626769_GAAATGAGTGCTAGCC-1  | GSM4626769 | OA |
| GSM4626769_GAAATGAGTGTAAGTA-1  | GSM4626769 | OA |

|                               |            |    |
|-------------------------------|------------|----|
| GSM4626769_GAAATGAGTTCGTGAT-1 | GSM4626769 | OA |
| GSM4626769_GAAATGATCATCGCTC-1 | GSM4626769 | OA |
| GSM4626769_GAAATGATCCTGTAGA-1 | GSM4626769 | OA |
| GSM4626769_GAACATCAGGAGTTTA-1 | GSM4626769 | OA |
| GSM4626769_GAACATCAGGTAAACT-1 | GSM4626769 | OA |
| GSM4626769_GAACATCAGTCCTCCT-1 | GSM4626769 | OA |
| GSM4626769_GAACATCCAGACGCTC-1 | GSM4626769 | OA |
| GSM4626769_GAACATCGTACTCAAC-1 | GSM4626769 | OA |
| GSM4626769_GAACATCGTCCGTGAC-1 | GSM4626769 | OA |
| GSM4626769_GAACATCTCTATCCTA-1 | GSM4626769 | OA |
| GSM4626769_GAACCTAAGGGAGTAA-1 | GSM4626769 | OA |
| GSM4626769_GAACCTAAGTCGTTTG-1 | GSM4626769 | OA |
| GSM4626769_GAACCTAAGTTAGGTA-1 | GSM4626769 | OA |
| GSM4626769_GAACCTAGTAACGTTT-1 | GSM4626769 | OA |
| GSM4626769_GAACCTAGTCTAGGTT-1 | GSM4626769 | OA |
| GSM4626769_GAACGGAAGAATGTTG-1 | GSM4626769 | OA |
| GSM4626769_GAACGGAAGACTCGGA-1 | GSM4626769 | OA |
| GSM4626769_GAACGGAAGATCCCGC-1 | GSM4626769 | OA |
| GSM4626769_GAACGGAAGCGGCTTC-1 | GSM4626769 | OA |
| GSM4626769_GAACGGAAGTACGCC-1  | GSM4626769 | OA |
| GSM4626769_GAACGGACAGTTTACG-1 | GSM4626769 | OA |
| GSM4626769_GAACGGAGTACCGCTG-1 | GSM4626769 | OA |
| GSM4626769_GAACGGAGTATTCTCT-1 | GSM4626769 | OA |
| GSM4626769_GAAGCAGAGAATGTGT-1 | GSM4626769 | OA |
| GSM4626769_GAAGCAGAGATCCGAG-1 | GSM4626769 | OA |
| GSM4626769_GAAGCAGAGCTGATAA-1 | GSM4626769 | OA |
| GSM4626769_GAAGCAGAGGCCCTTG-1 | GSM4626769 | OA |
| GSM4626769_GAAGCAGCAAGCTGGA-1 | GSM4626769 | OA |
| GSM4626769_GAAGCAGCAAGTTCTG-1 | GSM4626769 | OA |
| GSM4626769_GAAGCAGCATGTTCCC-1 | GSM4626769 | OA |
| GSM4626769_GAAGCAGGTAAGTACG-1 | GSM4626769 | OA |
| GSM4626769_GAAGCAGGTCGCCATG-1 | GSM4626769 | OA |
| GSM4626769_GAAGCAGTCCATTAT-1  | GSM4626769 | OA |
| GSM4626769_GAAGCAGTCCGAGCCA-1 | GSM4626769 | OA |
| GSM4626769_GAAGCAGTCCGCATAA-1 | GSM4626769 | OA |
| GSM4626769_GAAGCAGTCCGGCACA-1 | GSM4626769 | OA |
| GSM4626769_GAATAAGAGACCGGAT-1 | GSM4626769 | OA |
| GSM4626769_GAATAAGAGGTGCACA-1 | GSM4626769 | OA |
| GSM4626769_GAATAAGCACGGATAG-1 | GSM4626769 | OA |
| GSM4626769_GAATAAGGTCCAATA-1  | GSM4626769 | OA |
| GSM4626769_GAATAAGTCTTTAGGG-1 | GSM4626769 | OA |
| GSM4626769_GAATGAAAGAGTTGGC-1 | GSM4626769 | OA |
| GSM4626769_GAATGAAAGGCAGGTT-1 | GSM4626769 | OA |
| GSM4626769_GAATGAACAAGAAGAG-1 | GSM4626769 | OA |
| GSM4626769_GAATGAACATGAACCT-1 | GSM4626769 | OA |
| GSM4626769_GAATGAAGTAATCACC-1 | GSM4626769 | OA |
| GSM4626769_GAATGAAGTGAGGCTA-1 | GSM4626769 | OA |
| GSM4626769_GAATGAAGTGCCTGCA-1 | GSM4626769 | OA |
| GSM4626769_GAATGAATCTCGCATC-1 | GSM4626769 | OA |
| GSM4626769_GACACGCCAAACCTAC-1 | GSM4626769 | OA |
| GSM4626769_GACACGCCAAGTCTGT-1 | GSM4626769 | OA |
| GSM4626769_GACACGCCATGCCCGA-1 | GSM4626769 | OA |
| GSM4626769_GACACGCTCACAGTAC-1 | GSM4626769 | OA |
| GSM4626769_GACAGAGAGAGGGATA-1 | GSM4626769 | OA |
| GSM4626769_GACAGAGAGCCACGCT-1 | GSM4626769 | OA |
| GSM4626769_GACAGAGAGGCGCTCT-1 | GSM4626769 | OA |
| GSM4626769_GACAGAGAGGTGGGTT-1 | GSM4626769 | OA |



|                               |            |    |
|-------------------------------|------------|----|
| GSM4626769_GACAGAGCAATGGTCT-1 | GSM4626769 | OA |
| GSM4626769_GACAGAGCACAGCGTC-1 | GSM4626769 | OA |
| GSM4626769_GACAGAGCATACGCCG-1 | GSM4626769 | OA |
| GSM4626769_GACAGAGGTTGAGGTG-1 | GSM4626769 | OA |
| GSM4626769_GACAGAGTCAAGAAGT-1 | GSM4626769 | OA |
| GSM4626769_GACAGAGTCGTGACAT-1 | GSM4626769 | OA |
| GSM4626769_GACCAATAGCTTTGGT-1 | GSM4626769 | OA |
| GSM4626769_GACCAATGTCACAAGG-1 | GSM4626769 | OA |
| GSM4626769_GACCAATTCCTAACC-1  | GSM4626769 | OA |
| GSM4626769_GACCAATTCTGTCCGT-1 | GSM4626769 | OA |
| GSM4626769_GACCTGGAGCTAGTCT-1 | GSM4626769 | OA |
| GSM4626769_GACCTGGAGTAGGTGC-1 | GSM4626769 | OA |
| GSM4626769_GACCTGGAGTGATCGG-1 | GSM4626769 | OA |
| GSM4626769_GACCTGGGTATGAAAC-1 | GSM4626769 | OA |
| GSM4626769_GACCTGGTCATAAAGG-1 | GSM4626769 | OA |
| GSM4626769_GACCTGGTCCAGGGCT-1 | GSM4626769 | OA |
| GSM4626769_GACCTGGTCTTGTCAT-1 | GSM4626769 | OA |
| GSM4626769_GACGCGTGTACCGTTA-1 | GSM4626769 | OA |
| GSM4626769_GACGCGTGTACCCAG-1  | GSM4626769 | OA |
| GSM4626769_GACGCGTGTGTTAAGA-1 | GSM4626769 | OA |
| GSM4626769_GACGCGTTCATTGCC-1  | GSM4626769 | OA |
| GSM4626769_GACGCGTTCAGAGGA-1  | GSM4626769 | OA |
| GSM4626769_GACGCGTTCCTGCCAT-1 | GSM4626769 | OA |
| GSM4626769_GACGCGTTCGCTGATA-1 | GSM4626769 | OA |
| GSM4626769_GACGGCTCAGCTGTTA-1 | GSM4626769 | OA |
| GSM4626769_GACGGCTCAGTATGCT-1 | GSM4626769 | OA |
| GSM4626769_GACGGCTTCCTAACC-1  | GSM4626769 | OA |
| GSM4626769_GACGGCTTCTGTCCGT-1 | GSM4626769 | OA |
| GSM4626769_GACGTGCAGAGTTAT-1  | GSM4626769 | OA |
| GSM4626769_GACGTGCAGTAAGTAC-1 | GSM4626769 | OA |
| GSM4626769_GACGTGCCAAATCCGT-1 | GSM4626769 | OA |
| GSM4626769_GACGTGCCACCTCGGA-1 | GSM4626769 | OA |
| GSM4626769_GACGTGCCAGCCAATT-1 | GSM4626769 | OA |
| GSM4626769_GACGTTAAGTAGCGGT-1 | GSM4626769 | OA |
| GSM4626769_GACGTTAAGTCAATAG-1 | GSM4626769 | OA |
| GSM4626769_GACGTTAGTAGCGCTC-1 | GSM4626769 | OA |
| GSM4626769_GACGTTAGTCTCGTTC-1 | GSM4626769 | OA |
| GSM4626769_GACGTTAGTGAGGGAG-1 | GSM4626769 | OA |
| GSM4626769_GACTAACAGAACTCGG-1 | GSM4626769 | OA |
| GSM4626769_GACTAACAGAGTGACC-1 | GSM4626769 | OA |
| GSM4626769_GACTAACCAAGGACAC-1 | GSM4626769 | OA |
| GSM4626769_GACTAACCAATGGAGC-1 | GSM4626769 | OA |
| GSM4626769_GACTAACGTAGGACAC-1 | GSM4626769 | OA |
| GSM4626769_GACTAACGTTGGAGGT-1 | GSM4626769 | OA |
| GSM4626769_GACTAACTCACAAACC-1 | GSM4626769 | OA |
| GSM4626769_GACTACAAGCAGCCTC-1 | GSM4626769 | OA |
| GSM4626769_GACTACACAAGTTGTC-1 | GSM4626769 | OA |
| GSM4626769_GACTACACAGGCAGTA-1 | GSM4626769 | OA |
| GSM4626769_GACTACAGTCTTTCAT-1 | GSM4626769 | OA |
| GSM4626769_GACTACATCAACACAC-1 | GSM4626769 | OA |
| GSM4626769_GACTACATCCGGCACA-1 | GSM4626769 | OA |
| GSM4626769_GACTACATCGCTTGTC-1 | GSM4626769 | OA |
| GSM4626769_GACTACATCTCTTATG-1 | GSM4626769 | OA |
| GSM4626769_GACTACATCTTGCAAG-1 | GSM4626769 | OA |
| GSM4626769_GACTGCGAGACCCACC-1 | GSM4626769 | OA |
| GSM4626769_GACTGCGAGGATGTAT-1 | GSM4626769 | OA |
| GSM4626769_GACTGCGCAAAGGTGC-1 | GSM4626769 | OA |

|                                |            |    |
|--------------------------------|------------|----|
| GSM4626769_GACTGCGCACACTGCG-1  | GSM4626769 | OA |
| GSM4626769_GACTGCGCATCGATGT-1  | GSM4626769 | OA |
| GSM4626769_GACTGCGCATTGGGCC-1  | GSM4626769 | OA |
| GSM4626769_GACTGCGGTCTCTTTA-1  | GSM4626769 | OA |
| GSM4626769_GAGCAGAAGAAACCGC-1  | GSM4626769 | OA |
| GSM4626769_GAGCAGAAGATGTCGG-1  | GSM4626769 | OA |
| GSM4626769_GAGCAGAAGGGTTCCC-1  | GSM4626769 | OA |
| GSM4626769_GAGCAGACAATAAGCA-1  | GSM4626769 | OA |
| GSM4626769_GAGCAGACACAAGCCC-1  | GSM4626769 | OA |
| GSM4626769_GAGCAGACACTATCTT-1  | GSM4626769 | OA |
| GSM4626769_GAGCAGAGTCTGCGGT-1  | GSM4626769 | OA |
| GSM4626769_GAGCAGATCAAGGTAA-1  | GSM4626769 | OA |
| GSM4626769_GAGCAGATCCCTCAGT-1  | GSM4626769 | OA |
| GSM4626769_GAGCAGATCGTCTGAA-1  | GSM4626769 | OA |
| GSM4626769_GAGGTGAAGCTACCTA-1  | GSM4626769 | OA |
| GSM4626769_GAGGTGAAGGACGAAA-1  | GSM4626769 | OA |
| GSM4626769_GAGGTGAAGGTAGCTG-1  | GSM4626769 | OA |
| GSM4626769_GAGGTGACAATGGATA-1  | GSM4626769 | OA |
| GSM4626769_GAGGTGACAGATGGGT-1  | GSM4626769 | OA |
| GSM4626769_GAGGTGAGTTATCACG-1  | GSM4626769 | OA |
| GSM4626769_GAGGTGATCAGTGCAT-1  | GSM4626769 | OA |
| GSM4626769_GAGGTGATCTCTGTCTG-1 | GSM4626769 | OA |
| GSM4626769_GAGTCCGAGCGATTCT-1  | GSM4626769 | OA |
| GSM4626769_GAGTCCGAGGTGATTA-1  | GSM4626769 | OA |
| GSM4626769_GAGTCCGCACGTTGGC-1  | GSM4626769 | OA |
| GSM4626769_GAGTCCGCAGTATGCT-1  | GSM4626769 | OA |
| GSM4626769_GAGTCCGCATTGGTAC-1  | GSM4626769 | OA |
| GSM4626769_GAGTCCGGTCAACATC-1  | GSM4626769 | OA |
| GSM4626769_GAGTCCGGTCTAGAGG-1  | GSM4626769 | OA |
| GSM4626769_GAGTCCGGTGCGATAG-1  | GSM4626769 | OA |
| GSM4626769_GAGTCCGGTTACCGAT-1  | GSM4626769 | OA |
| GSM4626769_GATCAGTGTTGTACAC-1  | GSM4626769 | OA |
| GSM4626769_GATCGATAGATGTGGC-1  | GSM4626769 | OA |
| GSM4626769_GATCGATAGGGTATCG-1  | GSM4626769 | OA |
| GSM4626769_GATCGATCAGGTCGTC-1  | GSM4626769 | OA |
| GSM4626769_GATCGATGTGACTACT-1  | GSM4626769 | OA |
| GSM4626769_GATCGATGTGGTCCGT-1  | GSM4626769 | OA |
| GSM4626769_GATCGCGAGCCGGTAA-1  | GSM4626769 | OA |
| GSM4626769_GATCGCGGTGTCTGAT-1  | GSM4626769 | OA |
| GSM4626769_GATCGCGTCCACTGGG-1  | GSM4626769 | OA |
| GSM4626769_GATCGCGTCCGTTGCT-1  | GSM4626769 | OA |
| GSM4626769_GATCGTACACATCCAA-1  | GSM4626769 | OA |
| GSM4626769_GATCGTAGTCCTCTTG-1  | GSM4626769 | OA |
| GSM4626769_GATCGTATCCACGTTT-1  | GSM4626769 | OA |
| GSM4626769_GATCGTATCGCATGGC-1  | GSM4626769 | OA |
| GSM4626769_GATCTAGAGACAGAGA-1  | GSM4626769 | OA |
| GSM4626769_GATCTAGAGTGTACTC-1  | GSM4626769 | OA |
| GSM4626769_GATCTAGCACTTCTGC-1  | GSM4626769 | OA |
| GSM4626769_GATCTAGGTCTCATCC-1  | GSM4626769 | OA |
| GSM4626769_GATCTAGGTTGGTAAA-1  | GSM4626769 | OA |
| GSM4626769_GATCTAGTCCGAAGAG-1  | GSM4626769 | OA |
| GSM4626769_GATGAAACACATGGGA-1  | GSM4626769 | OA |
| GSM4626769_GATGAAACACCGCTAG-1  | GSM4626769 | OA |
| GSM4626769_GATGAAACACTTAAGC-1  | GSM4626769 | OA |
| GSM4626769_GATGAAAGTCATGCCG-1  | GSM4626769 | OA |
| GSM4626769_GATGAAAGTGCTGTAT-1  | GSM4626769 | OA |
| GSM4626769_GATGAAAGTTCAGCGC-1  | GSM4626769 | OA |

|                               |            |    |
|-------------------------------|------------|----|
| GSM4626769_GATGAAATCAGTTAGC-1 | GSM4626769 | OA |
| GSM4626769_GATGAAATCTACTTAC-1 | GSM4626769 | OA |
| GSM4626769_GATGAGGAGAAGGCCT-1 | GSM4626769 | OA |
| GSM4626769_GATGAGGCATCATCCC-1 | GSM4626769 | OA |
| GSM4626769_GATGAGGGTAATAGCA-1 | GSM4626769 | OA |
| GSM4626769_GATGAGGGTATTCTCT-1 | GSM4626769 | OA |
| GSM4626769_GATGAGGGTGATAAGT-1 | GSM4626769 | OA |
| GSM4626769_GATGAGGGTGTCATC-1  | GSM4626769 | OA |
| GSM4626769_GATGCTAAGATATGGT-1 | GSM4626769 | OA |
| GSM4626769_GATGCTAAGTTGAGAT-1 | GSM4626769 | OA |
| GSM4626769_GATGCTACAACCGCCA-1 | GSM4626769 | OA |
| GSM4626769_GATGCTAGTTACGGAG-1 | GSM4626769 | OA |
| GSM4626769_GATGCTATCCCTGACT-1 | GSM4626769 | OA |
| GSM4626769_GATGCTATCGATAGAA-1 | GSM4626769 | OA |
| GSM4626769_GATGCTATCTTTACGT-1 | GSM4626769 | OA |
| GSM4626769_GATTCAGAGACAAGCC-1 | GSM4626769 | OA |
| GSM4626769_GATTCAGAGGCAGGTT-1 | GSM4626769 | OA |
| GSM4626769_GATTCAGGTACAAGTA-1 | GSM4626769 | OA |
| GSM4626769_GATTCAGGTATTCTCT-1 | GSM4626769 | OA |
| GSM4626769_GATTCAGTCGGTTAAC-1 | GSM4626769 | OA |
| GSM4626769_GCAAAGTAGAGCCCAA-1 | GSM4626769 | OA |
| GSM4626769_GCAAAGTAGCACAGGT-1 | GSM4626769 | OA |
| GSM4626769_GCAAAGTAGTGGAGTC-1 | GSM4626769 | OA |
| GSM4626769_GCAAAGTAGTGTTAGA-1 | GSM4626769 | OA |
| GSM4626769_GCAAAGTCAATGAAAC-1 | GSM4626769 | OA |
| GSM4626769_GCAAAGTGTACAGTGG-1 | GSM4626769 | OA |
| GSM4626769_GCAAAGTGTGAACCTT-1 | GSM4626769 | OA |
| GSM4626769_GCAAAGTTCGCTTAGA-1 | GSM4626769 | OA |
| GSM4626769_GCAATCAAGATCACGG-1 | GSM4626769 | OA |
| GSM4626769_GCAATCAAGGACACCA-1 | GSM4626769 | OA |
| GSM4626769_GCACATAAGGCTCAGA-1 | GSM4626769 | OA |
| GSM4626769_GCACATACACATGACT-1 | GSM4626769 | OA |
| GSM4626769_GCACATAGTAAGGATT-1 | GSM4626769 | OA |
| GSM4626769_GCACATAGTCTAAACC-1 | GSM4626769 | OA |
| GSM4626769_GCACATAGTGGGTATG-1 | GSM4626769 | OA |
| GSM4626769_GCACATATCCCAAGAT-1 | GSM4626769 | OA |
| GSM4626769_GCACATATCGGCTTGG-1 | GSM4626769 | OA |
| GSM4626769_GCACATATCTCAAGTG-1 | GSM4626769 | OA |
| GSM4626769_GCACTCTAGAAGATTC-1 | GSM4626769 | OA |
| GSM4626769_GCACTCTCAAGGACTG-1 | GSM4626769 | OA |
| GSM4626769_GCACTCTCACATTTCT-1 | GSM4626769 | OA |
| GSM4626769_GCACTCTGTATCACCA-1 | GSM4626769 | OA |
| GSM4626769_GCACTCTGTCTCACCT-1 | GSM4626769 | OA |
| GSM4626769_GCACTCTTCGTACCGG-1 | GSM4626769 | OA |
| GSM4626769_GCAGCCAAGGCATGGT-1 | GSM4626769 | OA |
| GSM4626769_GCAGCCACACAAGTAA-1 | GSM4626769 | OA |
| GSM4626769_GCAGCCACACCCTATC-1 | GSM4626769 | OA |
| GSM4626769_GCAGCCAGTATTCTCT-1 | GSM4626769 | OA |
| GSM4626769_GCAGCCATCAAGGCTT-1 | GSM4626769 | OA |
| GSM4626769_GCAGCCATCATCGATG-1 | GSM4626769 | OA |
| GSM4626769_GCAGTTAAGGAGCGAG-1 | GSM4626769 | OA |
| GSM4626769_GCAGTTACTTAAGC-1   | GSM4626769 | OA |
| GSM4626769_GCAGTTAGTAGAAGGA-1 | GSM4626769 | OA |
| GSM4626769_GCAGTTAGTGACTACT-1 | GSM4626769 | OA |
| GSM4626769_GCAGTTATCAAACCAC-1 | GSM4626769 | OA |
| GSM4626769_GCATACAAGTCCTCCT-1 | GSM4626769 | OA |
| GSM4626769_GCATACAAGTGTCTCA-1 | GSM4626769 | OA |

|                                 |            |    |
|---------------------------------|------------|----|
| GSM4626769_GCATACAGTATAAACG-1   | GSM4626769 | OA |
| GSM4626769_GCATACAGTATGAAAC-1   | GSM4626769 | OA |
| GSM4626769_GCATACAGTGATAAAC-1   | GSM4626769 | OA |
| GSM4626769_GCATACATCCATGAAC-1   | GSM4626769 | OA |
| GSM4626769_GCATACATCTGCAAGT-1   | GSM4626769 | OA |
| GSM4626769_GCATGATAGATCCGAG-1   | GSM4626769 | OA |
| GSM4626769_GCATGATAGTGCTGCC-1   | GSM4626769 | OA |
| GSM4626769_GCATGATCAAATCCGT-1   | GSM4626769 | OA |
| GSM4626769_GCATGATTCGCCAAAT-1   | GSM4626769 | OA |
| GSM4626769_GCATGCGAGGCATGTG-1   | GSM4626769 | OA |
| GSM4626769_GCATGCGGTGTCGCTG-1   | GSM4626769 | OA |
| GSM4626769_GCATGCGTCCGAGCCA-1   | GSM4626769 | OA |
| GSM4626769_GCATGTAAGCCAACAG-1   | GSM4626769 | OA |
| GSM4626769_GCATGTAAGTGTACGG-1   | GSM4626769 | OA |
| GSM4626769_GCATGTACACGTCTCT-1   | GSM4626769 | OA |
| GSM4626769_GCATGTACATGCTGGC-1   | GSM4626769 | OA |
| GSM4626769_GCATGTAGTAACGACG-1   | GSM4626769 | OA |
| GSM4626769_GCATGTATCAGTGTTG-1   | GSM4626769 | OA |
| GSM4626769_GCATGTATCGTAGGAG-1   | GSM4626769 | OA |
| GSM4626769_GCATGTATCTCGTATT-1   | GSM4626769 | OA |
| GSM4626769_GCATGTATCTGCGTAA-1   | GSM4626769 | OA |
| GSM4626769_GCCAAATAGAGCAATT-1   | GSM4626769 | OA |
| GSM4626769_GCCAAATTCCTATTA-1    | GSM4626769 | OA |
| GSM4626769_GCCTCTAAGCGATATA-1   | GSM4626769 | OA |
| GSM4626769_GCCTCTAGTCTAGCGC-1   | GSM4626769 | OA |
| GSM4626769_GCCTCTAGTTAGATGA-1   | GSM4626769 | OA |
| GSM4626769_GCCTCTATCGTCTGAA-1   | GSM4626769 | OA |
| GSM4626769_GCCTCTATCTGGTGTA-1   | GSM4626769 | OA |
| GSM4626769_GCGACCAAGGATGGAA-1   | GSM4626769 | OA |
| GSM4626769_GCGACCAAGGTGATTA-1   | GSM4626769 | OA |
| GSM4626769_GCGACCACAAGGGTCA-1   | GSM4626769 | OA |
| GSM4626769_GCGACCACATGTTCCC-1   | GSM4626769 | OA |
| GSM4626769_GCGACCAGTCGACTGC-1   | GSM4626769 | OA |
| GSM4626769_GCGACCATCCTACAGA-1   | GSM4626769 | OA |
| GSM4626769_GCGACCATCTGTTTGT-1   | GSM4626769 | OA |
| GSM4626769_GCGAGAAAGGGAACGG-1   | GSM4626769 | OA |
| GSM4626769_GCGAGAAAGTAGGCCA-1   | GSM4626769 | OA |
| GSM4626769_GCGAGAAAGTTTCCTT-1   | GSM4626769 | OA |
| GSM4626769_GCGAGAACACAACACTGT-1 | GSM4626769 | OA |
| GSM4626769_GCGAGAAGTATAGGGC-1   | GSM4626769 | OA |
| GSM4626769_GCGAGAATCAACGGCC-1   | GSM4626769 | OA |
| GSM4626769_GCGCAACAGATCTGAA-1   | GSM4626769 | OA |
| GSM4626769_GCGCAACAGGATGGTC-1   | GSM4626769 | OA |
| GSM4626769_GCGCAACAGGCAATTA-1   | GSM4626769 | OA |
| GSM4626769_GCGCAACAGTAGATGT-1   | GSM4626769 | OA |
| GSM4626769_GCGCAACAGTGAATTG-1   | GSM4626769 | OA |
| GSM4626769_GCGCAACCAAGCTGTT-1   | GSM4626769 | OA |
| GSM4626769_GCGCAACTCCAACTG-1    | GSM4626769 | OA |
| GSM4626769_GCGCAACTCGTGGTCG-1   | GSM4626769 | OA |
| GSM4626769_GCGCCAAAGCTTTGGT-1   | GSM4626769 | OA |
| GSM4626769_GCGCCAAGTACCGTTA-1   | GSM4626769 | OA |
| GSM4626769_GCGCCAAGTATGAAAC-1   | GSM4626769 | OA |
| GSM4626769_GCGCCAATCAGCAACT-1   | GSM4626769 | OA |
| GSM4626769_GCGCCAATCGGCGGTT-1   | GSM4626769 | OA |
| GSM4626769_GCGCCAATCTTGTA-1     | GSM4626769 | OA |
| GSM4626769_GCGCGATAGCGTAATA-1   | GSM4626769 | OA |
| GSM4626769_GCGCGATAGTGAACGC-1   | GSM4626769 | OA |

|                                |            |    |
|--------------------------------|------------|----|
| GSM4626769_GCGCGATCACAGTCGC-1  | GSM4626769 | OA |
| GSM4626769_GCGCGATCAGGGTTAG-1  | GSM4626769 | OA |
| GSM4626769_GCGCGATGTTACGCGC-1  | GSM4626769 | OA |
| GSM4626769_GCGGGTTCAACTGCGC-1  | GSM4626769 | OA |
| GSM4626769_GCGGGTTCAGAAGCAC-1  | GSM4626769 | OA |
| GSM4626769_GCGGGTTTTACAACGT-1  | GSM4626769 | OA |
| GSM4626769_GCGGGTTTTCGTTTATC-1 | GSM4626769 | OA |
| GSM4626769_GCTCCTAAGATCCGAG-1  | GSM4626769 | OA |
| GSM4626769_GCTCCTACACTTACGA-1  | GSM4626769 | OA |
| GSM4626769_GCTCCTACAGACGCAA-1  | GSM4626769 | OA |
| GSM4626769_GCTCCTAGTATGAAAC-1  | GSM4626769 | OA |
| GSM4626769_GCTCCTATCGAGAGCA-1  | GSM4626769 | OA |
| GSM4626769_GCTCTGTAGAGTACCG-1  | GSM4626769 | OA |
| GSM4626769_GCTCTGTAGTATCGAA-1  | GSM4626769 | OA |
| GSM4626769_GCTCTGTCACGGCTAC-1  | GSM4626769 | OA |
| GSM4626769_GCTCTGTCAGTGAGTG-1  | GSM4626769 | OA |
| GSM4626769_GCTCTGTCATGCTGGC-1  | GSM4626769 | OA |
| GSM4626769_GCTCTGTGTAGAGTGC-1  | GSM4626769 | OA |
| GSM4626769_GCTCTGTGTCTCCATC-1  | GSM4626769 | OA |
| GSM4626769_GCTCTGTGTCTGCAAT-1  | GSM4626769 | OA |
| GSM4626769_GCTGCAGGTGCAACGA-1  | GSM4626769 | OA |
| GSM4626769_GCTGCAGTCCGTTGCT-1  | GSM4626769 | OA |
| GSM4626769_GCTGCAGTCTTCGGTC-1  | GSM4626769 | OA |
| GSM4626769_GCTGCGAAGCAATCTC-1  | GSM4626769 | OA |
| GSM4626769_GCTGCGAAGGACGAAA-1  | GSM4626769 | OA |
| GSM4626769_GCTGCGAGTCTTGCGG-1  | GSM4626769 | OA |
| GSM4626769_GCTGCGATCTCTTATG-1  | GSM4626769 | OA |
| GSM4626769_GCTGCTTAGACTTGAA-1  | GSM4626769 | OA |
| GSM4626769_GCTGCTTAGTTCGCGC-1  | GSM4626769 | OA |
| GSM4626769_GCTGCTTGATTCTCT-1   | GSM4626769 | OA |
| GSM4626769_GCTGCTTGTCATCGGC-1  | GSM4626769 | OA |
| GSM4626769_GCTGCTTGTCACTTA-1   | GSM4626769 | OA |
| GSM4626769_GCTGCTTTCACTCCTG-1  | GSM4626769 | OA |
| GSM4626769_GCTGGGTAGAAACCGC-1  | GSM4626769 | OA |
| GSM4626769_GCTGGGTAGACAGAGA-1  | GSM4626769 | OA |
| GSM4626769_GCTGGGTAGAGGTAGA-1  | GSM4626769 | OA |
| GSM4626769_GCTGGGTGTAAGAGAG-1  | GSM4626769 | OA |
| GSM4626769_GCTGGGTGTCGGCACT-1  | GSM4626769 | OA |
| GSM4626769_GCTGGGTGTGCAGGTA-1  | GSM4626769 | OA |
| GSM4626769_GCTGGGTGTTTCGCTC-1  | GSM4626769 | OA |
| GSM4626769_GCTGGGTTCAGTACGT-1  | GSM4626769 | OA |
| GSM4626769_GCTGGGTTCCGTCATC-1  | GSM4626769 | OA |
| GSM4626769_GCTTCCAAGATCACGG-1  | GSM4626769 | OA |
| GSM4626769_GCTTCCACAAATCCGT-1  | GSM4626769 | OA |
| GSM4626769_GCTTCCACAAGACACG-1  | GSM4626769 | OA |
| GSM4626769_GCTTCCAGTGACTACT-1  | GSM4626769 | OA |
| GSM4626769_GCTTCCATCAATCTCT-1  | GSM4626769 | OA |
| GSM4626769_GCTTGAAAGAGAACAG-1  | GSM4626769 | OA |
| GSM4626769_GCTTGAAGTCTAGCCG-1  | GSM4626769 | OA |
| GSM4626769_GCTTGAAGTTCGTGAT-1  | GSM4626769 | OA |
| GSM4626769_GCTTGAATCCCTGACT-1  | GSM4626769 | OA |
| GSM4626769_GCTTGAATCCTCGCAT-1  | GSM4626769 | OA |
| GSM4626769_GCTTGAATCTGGTGTA-1  | GSM4626769 | OA |
| GSM4626769_GGAAAGCAGACAATAC-1  | GSM4626769 | OA |
| GSM4626769_GGAAAGCAGGATGTAT-1  | GSM4626769 | OA |
| GSM4626769_GGAAAGCCACCGCTAG-1  | GSM4626769 | OA |
| GSM4626769_GGAAAGCCACGCTTTC-1  | GSM4626769 | OA |

|                                |            |    |
|--------------------------------|------------|----|
| GSM4626769_GGAAAGCCAGATGAGC-1  | GSM4626769 | OA |
| GSM4626769_GGAAAGCGTCCGACGT-1  | GSM4626769 | OA |
| GSM4626769_GGAAAGCTCAGAAATG-1  | GSM4626769 | OA |
| GSM4626769_GGAACTTAGCCTATGT-1  | GSM4626769 | OA |
| GSM4626769_GGAACTTCAAGGACTG-1  | GSM4626769 | OA |
| GSM4626769_GGAACTTGTGGCCCTA-1  | GSM4626769 | OA |
| GSM4626769_GGAACTTGTTGAGACT-1  | GSM4626769 | OA |
| GSM4626769_GGAACTTTCGACGGAA-1  | GSM4626769 | OA |
| GSM4626769_GGAATAAAGAACAAC-1   | GSM4626769 | OA |
| GSM4626769_GGAATAAAGCGTGTCC-1  | GSM4626769 | OA |
| GSM4626769_GGAATAACATGTAAGA-1  | GSM4626769 | OA |
| GSM4626769_GGAATAAGTAACGACG-1  | GSM4626769 | OA |
| GSM4626769_GGAATAAGTCCTGCTT-1  | GSM4626769 | OA |
| GSM4626769_GGAATAATCAGCTCGG-1  | GSM4626769 | OA |
| GSM4626769_GGAATAATCAGCTTAG-1  | GSM4626769 | OA |
| GSM4626769_GGAATAATCTCTTGAT-1  | GSM4626769 | OA |
| GSM4626769_GGACAAGAGCAATATG-1  | GSM4626769 | OA |
| GSM4626769_GGACAAGAGTGTTAGA-1  | GSM4626769 | OA |
| GSM4626769_GGACAAGCAGGAACGT-1  | GSM4626769 | OA |
| GSM4626769_GGACAAGCATGTCCTC-1  | GSM4626769 | OA |
| GSM4626769_GGACAAGGTAAATGTG-1  | GSM4626769 | OA |
| GSM4626769_GGACAAGGTATAGGGC-1  | GSM4626769 | OA |
| GSM4626769_GGACAAGTCAGTTGAC-1  | GSM4626769 | OA |
| GSM4626769_GGACAGAAGAGCCTAG-1  | GSM4626769 | OA |
| GSM4626769_GGACAGAAGCCTATGT-1  | GSM4626769 | OA |
| GSM4626769_GGACAGAAGGTGTTAA-1  | GSM4626769 | OA |
| GSM4626769_GGACAGAGTTGGACCC-1  | GSM4626769 | OA |
| GSM4626769_GGACATTAGTCTCGGC-1  | GSM4626769 | OA |
| GSM4626769_GGACATTAGTTGCAGG-1  | GSM4626769 | OA |
| GSM4626769_GGACATTGTCTTGTC-1   | GSM4626769 | OA |
| GSM4626769_GGACATTTCTTGGGTA-1  | GSM4626769 | OA |
| GSM4626769_GGACGTCAGATTACCC-1  | GSM4626769 | OA |
| GSM4626769_GGACGTCAGGCAGTCA-1  | GSM4626769 | OA |
| GSM4626769_GGACGTCAGGTGTGGT-1  | GSM4626769 | OA |
| GSM4626769_GGACGTCACAGATTC-1   | GSM4626769 | OA |
| GSM4626769_GGACGTCCTTAACG-1    | GSM4626769 | OA |
| GSM4626769_GGACGTCGTCAGAGGT-1  | GSM4626769 | OA |
| GSM4626769_GGACGTCGTCCTAAGTT-1 | GSM4626769 | OA |
| GSM4626769_GGACGTCGTGTGGCTC-1  | GSM4626769 | OA |
| GSM4626769_GGACGTCGTTATCCGA-1  | GSM4626769 | OA |
| GSM4626769_GGACGTCTCATAAAGG-1  | GSM4626769 | OA |
| GSM4626769_GGAGCAAAGAGATGAG-1  | GSM4626769 | OA |
| GSM4626769_GGAGCAAAGGAACTGC-1  | GSM4626769 | OA |
| GSM4626769_GGAGCAAAGGATGGTC-1  | GSM4626769 | OA |
| GSM4626769_GGAGCAACAGGGCATA-1  | GSM4626769 | OA |
| GSM4626769_GGAGCAACAGTATAAG-1  | GSM4626769 | OA |
| GSM4626769_GGAGCAAGTCATTAGC-1  | GSM4626769 | OA |
| GSM4626769_GGAGCAAGTCGCGGTT-1  | GSM4626769 | OA |
| GSM4626769_GGAGCAAGTGGGTATG-1  | GSM4626769 | OA |
| GSM4626769_GGAGCAATCGCGGATC-1  | GSM4626769 | OA |
| GSM4626769_GGAGCAATCTACCAGA-1  | GSM4626769 | OA |
| GSM4626769_GGATGTTAGTGTACTC-1  | GSM4626769 | OA |
| GSM4626769_GGATGTTACGCGCTAC-1  | GSM4626769 | OA |
| GSM4626769_GGATGTTGAGCTGTAT-1  | GSM4626769 | OA |
| GSM4626769_GGATGTTCATAGTAAG-1  | GSM4626769 | OA |
| GSM4626769_GGATGTTGTTGTTGTT-1  | GSM4626769 | OA |
| GSM4626769_GGATTACAGACAGAGA-1  | GSM4626769 | OA |

|                                |            |    |
|--------------------------------|------------|----|
| GSM4626769_GGATTACAGTGCCATT-1  | GSM4626769 | OA |
| GSM4626769_GGATTACCAGTCTTCC-1  | GSM4626769 | OA |
| GSM4626769_GGATTACGTCATCCCT-1  | GSM4626769 | OA |
| GSM4626769_GGATTACGTTGGTGA-1   | GSM4626769 | OA |
| GSM4626769_GGATTACTCAAACGGG-1  | GSM4626769 | OA |
| GSM4626769_GGATTACTCATTGCC-1   | GSM4626769 | OA |
| GSM4626769_GGCAATTAGCAGATCG-1  | GSM4626769 | OA |
| GSM4626769_GGCAATTAGCCAACAG-1  | GSM4626769 | OA |
| GSM4626769_GGCAATTAGCTCAACT-1  | GSM4626769 | OA |
| GSM4626769_GGCAATTAGTTGAGAT-1  | GSM4626769 | OA |
| GSM4626769_GGCAATTCAAGCTGTT-1  | GSM4626769 | OA |
| GSM4626769_GGCAATTCAGGGTACA-1  | GSM4626769 | OA |
| GSM4626769_GGCAATTTTCAGTGTTG-1 | GSM4626769 | OA |
| GSM4626769_GGCAATTTCCGCATAA-1  | GSM4626769 | OA |
| GSM4626769_GGCCGATAGCAATATG-1  | GSM4626769 | OA |
| GSM4626769_GGCCGATCATGACGGA-1  | GSM4626769 | OA |
| GSM4626769_GGCGACTAGAACAATC-1  | GSM4626769 | OA |
| GSM4626769_GGCGACTAGGGCACTA-1  | GSM4626769 | OA |
| GSM4626769_GGCGACTCACCGGAAA-1  | GSM4626769 | OA |
| GSM4626769_GGCGACTGTGTGAATA-1  | GSM4626769 | OA |
| GSM4626769_GGCGTGTCAAGCGCTC-1  | GSM4626769 | OA |
| GSM4626769_GGCGTGTTCATTGCGGC-1 | GSM4626769 | OA |
| GSM4626769_GGCTCGAAGAGTCTGG-1  | GSM4626769 | OA |
| GSM4626769_GGCTCGAAGATGTGTA-1  | GSM4626769 | OA |
| GSM4626769_GGCTCGACAACCTGCGC-1 | GSM4626769 | OA |
| GSM4626769_GGCTCGACACGCATCG-1  | GSM4626769 | OA |
| GSM4626769_GGCTCGATCGCCAGCA-1  | GSM4626769 | OA |
| GSM4626769_GGCTCGATCGCCCTTA-1  | GSM4626769 | OA |
| GSM4626769_GGCTCGATCTGGTGTA-1  | GSM4626769 | OA |
| GSM4626769_GGCTGGTCAAGCTGAG-1  | GSM4626769 | OA |
| GSM4626769_GGCTGGTCACATAACC-1  | GSM4626769 | OA |
| GSM4626769_GGCTGGTCACCTGGTG-1  | GSM4626769 | OA |
| GSM4626769_GGCTGGTTCACCACCT-1  | GSM4626769 | OA |
| GSM4626769_GGCTGGTTCGCGCAA-1   | GSM4626769 | OA |
| GSM4626769_GGGAATGAGAAGTGT-1   | GSM4626769 | OA |
| GSM4626769_GGGAATGCAGTTAACC-1  | GSM4626769 | OA |
| GSM4626769_GGGAATGTCCACGCAG-1  | GSM4626769 | OA |
| GSM4626769_GGGAATGTCGGTCCGA-1  | GSM4626769 | OA |
| GSM4626769_GGGAATGTCGTTGACA-1  | GSM4626769 | OA |
| GSM4626769_GGGACCTAGAGAACAG-1  | GSM4626769 | OA |
| GSM4626769_GGGACCTAGCGTAGTG-1  | GSM4626769 | OA |
| GSM4626769_GGGACCTAGTCATGCT-1  | GSM4626769 | OA |
| GSM4626769_GGGACCTCAGCCTTTC-1  | GSM4626769 | OA |
| GSM4626769_GGGACCTCAGTATAAG-1  | GSM4626769 | OA |
| GSM4626769_GGGACCTGTCGATTGT-1  | GSM4626769 | OA |
| GSM4626769_GGGACCTTCAGAAATG-1  | GSM4626769 | OA |
| GSM4626769_GGGACCTTCAGTAGT-1   | GSM4626769 | OA |
| GSM4626769_GGGACCTTCTGAGGGA-1  | GSM4626769 | OA |
| GSM4626769_GGGAGATAGAAGGCCT-1  | GSM4626769 | OA |
| GSM4626769_GGGAGATAGAATTGTG-1  | GSM4626769 | OA |
| GSM4626769_GGGAGATAGCTAGCCC-1  | GSM4626769 | OA |
| GSM4626769_GGGAGATGTTGCGGCT-1  | GSM4626769 | OA |
| GSM4626769_GGGAGATGTTGATTGC-1  | GSM4626769 | OA |
| GSM4626769_GGGAGATTCCACTGGG-1  | GSM4626769 | OA |
| GSM4626769_GGGAGATTCCCTCAGT-1  | GSM4626769 | OA |
| GSM4626769_GGGATGAAGATAGCAT-1  | GSM4626769 | OA |
| GSM4626769_GGGATGAAGCTAACAA-1  | GSM4626769 | OA |

|                                |            |    |
|--------------------------------|------------|----|
| GSM4626769_GGGATGAAGCTATGCT-1  | GSM4626769 | OA |
| GSM4626769_GGGATGAAGTCTCGGC-1  | GSM4626769 | OA |
| GSM4626769_GGGATGAAGTTCCGCAT-1 | GSM4626769 | OA |
| GSM4626769_GGGATGACACCCAGTG-1  | GSM4626769 | OA |
| GSM4626769_GGGATGATCAGCCTAA-1  | GSM4626769 | OA |
| GSM4626769_GGGATGATCTGCAAGT-1  | GSM4626769 | OA |
| GSM4626769_GGGATGATCTTTCCTC-1  | GSM4626769 | OA |
| GSM4626769_GGGCACTAGCCACGTC-1  | GSM4626769 | OA |
| GSM4626769_GGGCACTCACTACAGT-1  | GSM4626769 | OA |
| GSM4626769_GGGCACTCACTTGGAT-1  | GSM4626769 | OA |
| GSM4626769_GGGCACTGTCCGAATT-1  | GSM4626769 | OA |
| GSM4626769_GGGCACTGTCTCCATC-1  | GSM4626769 | OA |
| GSM4626769_GGGCACTTCACGAAGG-1  | GSM4626769 | OA |
| GSM4626769_GGGCACTTCCAGATCA-1  | GSM4626769 | OA |
| GSM4626769_GGGCACTTCGGCTTGG-1  | GSM4626769 | OA |
| GSM4626769_GGGCACTTCGTTACGA-1  | GSM4626769 | OA |
| GSM4626769_GGGCATCAGACTGGGT-1  | GSM4626769 | OA |
| GSM4626769_GGGCATCCAAGCCATT-1  | GSM4626769 | OA |
| GSM4626769_GGGCATCCACCGTTGG-1  | GSM4626769 | OA |
| GSM4626769_GGGCATCTCTTTAGTC-1  | GSM4626769 | OA |
| GSM4626769_GGGTCTGAGGCCGAAT-1  | GSM4626769 | OA |
| GSM4626769_GGGTCTGAGTACATGA-1  | GSM4626769 | OA |
| GSM4626769_GGGTCTGCAGTGGAGT-1  | GSM4626769 | OA |
| GSM4626769_GGGTCTGCATGCAATC-1  | GSM4626769 | OA |
| GSM4626769_GGGTCTGGTTATTCTC-1  | GSM4626769 | OA |
| GSM4626769_GGGTCTGGTTCGCGAC-1  | GSM4626769 | OA |
| GSM4626769_GGGTCTGTCAATCTCT-1  | GSM4626769 | OA |
| GSM4626769_GGGTCTGTCTAGAGTC-1  | GSM4626769 | OA |
| GSM4626769_GGGTTGCAGGGCTCTC-1  | GSM4626769 | OA |
| GSM4626769_GGGTTGCGTGTGAAAT-1  | GSM4626769 | OA |
| GSM4626769_GGGTTGCGTTTAAGCC-1  | GSM4626769 | OA |
| GSM4626769_GGGTTGCTCCTTGGTC-1  | GSM4626769 | OA |
| GSM4626769_GGGTTGCTCGGAAACG-1  | GSM4626769 | OA |
| GSM4626769_GGTGAAGAGCAATCTC-1  | GSM4626769 | OA |
| GSM4626769_GGTGAAGAGTCCTCCT-1  | GSM4626769 | OA |
| GSM4626769_GGTGAAGAGTGCTGCC-1  | GSM4626769 | OA |
| GSM4626769_GGTGAAGCATCGGTTA-1  | GSM4626769 | OA |
| GSM4626769_GGTGAAGGTACGCACC-1  | GSM4626769 | OA |
| GSM4626769_GGTGAAGGTCATGCCG-1  | GSM4626769 | OA |
| GSM4626769_GGTGAAGGTTCTGTTT-1  | GSM4626769 | OA |
| GSM4626769_GGTGAAGTCAAAGTAG-1  | GSM4626769 | OA |
| GSM4626769_GGTGAAGTCAGTCCCT-1  | GSM4626769 | OA |
| GSM4626769_GGTGCGTAGACAGACC-1  | GSM4626769 | OA |
| GSM4626769_GGTGCGTAGAGTACCG-1  | GSM4626769 | OA |
| GSM4626769_GGTGCGGTACCCAAT-1   | GSM4626769 | OA |
| GSM4626769_GGTGCGTTCAGCATGT-1  | GSM4626769 | OA |
| GSM4626769_GGTGCGTTCCTGTACC-1  | GSM4626769 | OA |
| GSM4626769_GGTGCGTTCCTGAGA-1   | GSM4626769 | OA |
| GSM4626769_GGTGTTAAGAAACGAG-1  | GSM4626769 | OA |
| GSM4626769_GGTGTTAAGGACTGGT-1  | GSM4626769 | OA |
| GSM4626769_GGTGTTAAGGTGCAAC-1  | GSM4626769 | OA |
| GSM4626769_GGTGTTAAGTACATGA-1  | GSM4626769 | OA |
| GSM4626769_GGTGTTAAGTCCGTAT-1  | GSM4626769 | OA |
| GSM4626769_GGTGTTACACGCTTTC-1  | GSM4626769 | OA |
| GSM4626769_GGTGTTACATTTCACT-1  | GSM4626769 | OA |
| GSM4626769_GGTGTTAGTAGCGCAA-1  | GSM4626769 | OA |
| GSM4626769_GGTGTTAGTTATCGGT-1  | GSM4626769 | OA |



|                               |            |    |
|-------------------------------|------------|----|
| GSM4626769_GTAACGTAGCGAGAAA-1 | GSM4626769 | OA |
| GSM4626769_GTAACGTAGGTGGGTT-1 | GSM4626769 | OA |
| GSM4626769_GTAACGTAGTGGTAAT-1 | GSM4626769 | OA |
| GSM4626769_GTAACGTCAAATACAG-1 | GSM4626769 | OA |
| GSM4626769_GTAACGTCAGCTCCGA-1 | GSM4626769 | OA |
| GSM4626769_GTAACGTCATGGTAGG-1 | GSM4626769 | OA |
| GSM4626769_GTAACGTGTTGTGGCC-1 | GSM4626769 | OA |
| GSM4626769_GTAACGTTCATACGGT-1 | GSM4626769 | OA |
| GSM4626769_GTAACGTTCTTCATGT-1 | GSM4626769 | OA |
| GSM4626769_GTAACTGAGGATCGCA-1 | GSM4626769 | OA |
| GSM4626769_GTAACTGAGGTAGCTG-1 | GSM4626769 | OA |
| GSM4626769_GTAACTGAGTTGAGTA-1 | GSM4626769 | OA |
| GSM4626769_GTAACTGCAAACGCGA-1 | GSM4626769 | OA |
| GSM4626769_GTAACTGCATGTTGAC-1 | GSM4626769 | OA |
| GSM4626769_GTAACTGGTATCGCAT-1 | GSM4626769 | OA |
| GSM4626769_GTAACTGTCAATCTCT-1 | GSM4626769 | OA |
| GSM4626769_GTAACTGTCCAACTG-1  | GSM4626769 | OA |
| GSM4626769_GTAACTGTCCACGACG-1 | GSM4626769 | OA |
| GSM4626769_GTACGTAAGTAGCGGT-1 | GSM4626769 | OA |
| GSM4626769_GTACGTACATTAACCG-1 | GSM4626769 | OA |
| GSM4626769_GTACGTAGTCATATGC-1 | GSM4626769 | OA |
| GSM4626769_GTACGTATCGAACGGA-1 | GSM4626769 | OA |
| GSM4626769_GTACGTATCTCTAGGA-1 | GSM4626769 | OA |
| GSM4626769_GTACTCCAGTAACCCT-1 | GSM4626769 | OA |
| GSM4626769_GTACTCCCACGAAATA-1 | GSM4626769 | OA |
| GSM4626769_GTACTCCGTCTTGTC-1  | GSM4626769 | OA |
| GSM4626769_GTACTCCTCGGATGTT-1 | GSM4626769 | OA |
| GSM4626769_GTACTTTGTTGGTTTG-1 | GSM4626769 | OA |
| GSM4626769_GTAGGCCAGGACCACA-1 | GSM4626769 | OA |
| GSM4626769_GTAGGCCAGGCACATG-1 | GSM4626769 | OA |
| GSM4626769_GTAGGCCAGGCCCTCA-1 | GSM4626769 | OA |
| GSM4626769_GTAGGCCCAATCTGCA-1 | GSM4626769 | OA |
| GSM4626769_GTAGGCCACACCGCA-1  | GSM4626769 | OA |
| GSM4626769_GTAGGCCACGTCTCT-1  | GSM4626769 | OA |
| GSM4626769_GTAGGCCGTACAAGTA-1 | GSM4626769 | OA |
| GSM4626769_GTAGGCCTCACTTCAT-1 | GSM4626769 | OA |
| GSM4626769_GTAGGCCTCCAAATGC-1 | GSM4626769 | OA |
| GSM4626769_GTAGGCCTCCAGATCA-1 | GSM4626769 | OA |
| GSM4626769_GTAGGCCTCTCTGAGA-1 | GSM4626769 | OA |
| GSM4626769_GTAGTCAAGGAGTTGC-1 | GSM4626769 | OA |
| GSM4626769_GTAGTCAAGTACGACG-1 | GSM4626769 | OA |
| GSM4626769_GTAGTCACACATGTGT-1 | GSM4626769 | OA |
| GSM4626769_GTAGTCACATGTAGTC-1 | GSM4626769 | OA |
| GSM4626769_GTAGTCATCACTTACT-1 | GSM4626769 | OA |
| GSM4626769_GTATCTTCAGCCTTTC-1 | GSM4626769 | OA |
| GSM4626769_GTATCTTGTTGCGTTA-1 | GSM4626769 | OA |
| GSM4626769_GTATCTTTCATGCAAC-1 | GSM4626769 | OA |
| GSM4626769_GTATCTTCCGCGTTT-1  | GSM4626769 | OA |
| GSM4626769_GTATTCTCAAGCTGGA-1 | GSM4626769 | OA |
| GSM4626769_GTATTCTCAGACTCGC-1 | GSM4626769 | OA |
| GSM4626769_GTATTCTCATGACATC-1 | GSM4626769 | OA |
| GSM4626769_GTATTCTGTAAGCACG-1 | GSM4626769 | OA |
| GSM4626769_GTATTCTGTGTGCGTC-1 | GSM4626769 | OA |
| GSM4626769_GTATTCTTCCGCAAGC-1 | GSM4626769 | OA |
| GSM4626769_GTATTCTTCGTCCGTT-1 | GSM4626769 | OA |
| GSM4626769_GTCAAGTAGCTAACAA-1 | GSM4626769 | OA |
| GSM4626769_GTCAAGTCACTAGTAC-1 | GSM4626769 | OA |

|                                |            |    |
|--------------------------------|------------|----|
| GSM4626769_GTCAAGTGTAATCGTC-1  | GSM4626769 | OA |
| GSM4626769_GTCAAGTGACTCTCC-1   | GSM4626769 | OA |
| GSM4626769_GTCAAGGTAGCCTCG-1   | GSM4626769 | OA |
| GSM4626769_GTCAAGGTGTCCTCT-1   | GSM4626769 | OA |
| GSM4626769_GTCAAGTTCCTAAGTG-1  | GSM4626769 | OA |
| GSM4626769_GTCACAACACATGACT-1  | GSM4626769 | OA |
| GSM4626769_GTCACAAGTATGCTTG-1  | GSM4626769 | OA |
| GSM4626769_GTCACAATCAGTGTTG-1  | GSM4626769 | OA |
| GSM4626769_GTCACAATCTGCAGTA-1  | GSM4626769 | OA |
| GSM4626769_GTCACAATCTTTAGGG-1  | GSM4626769 | OA |
| GSM4626769_GTCACGGAGGGTTTCT-1  | GSM4626769 | OA |
| GSM4626769_GTCACGGGTAAGCACG-1  | GSM4626769 | OA |
| GSM4626769_GTCACGGGTGTGCCTG-1  | GSM4626769 | OA |
| GSM4626769_GTCACGGTCCTATTCA-1  | GSM4626769 | OA |
| GSM4626769_GTCACGGTCGCCATAA-1  | GSM4626769 | OA |
| GSM4626769_GTCATTTACGTGAGA-1   | GSM4626769 | OA |
| GSM4626769_GTCATTTTCCTTTACA-1  | GSM4626769 | OA |
| GSM4626769_GTCCTCACAAAGTCAA-1  | GSM4626769 | OA |
| GSM4626769_GTCCTCATCAGTTCGA-1  | GSM4626769 | OA |
| GSM4626769_GTCGGGTCACAGACTT-1  | GSM4626769 | OA |
| GSM4626769_GTCGGGTCATGTTCCC-1  | GSM4626769 | OA |
| GSM4626769_GTCGGGTGACTTAGC-1   | GSM4626769 | OA |
| GSM4626769_GTCGGGTGTTCGAATC-1  | GSM4626769 | OA |
| GSM4626769_GTCGGGTTCCAAAGTC-1  | GSM4626769 | OA |
| GSM4626769_GTCGGGTTCCCTTGACC-1 | GSM4626769 | OA |
| GSM4626769_GTCGGGTTCGAACGGA-1  | GSM4626769 | OA |
| GSM4626769_GTCGGGTTCGAGAACG-1  | GSM4626769 | OA |
| GSM4626769_GTCGGGTTCGCCCTTA-1  | GSM4626769 | OA |
| GSM4626769_GTCGTAAAGAGGTAGA-1  | GSM4626769 | OA |
| GSM4626769_GTCGTAAAGTACATGA-1  | GSM4626769 | OA |
| GSM4626769_GTCGTAAACATATGGTC-1 | GSM4626769 | OA |
| GSM4626769_GTCGTAAAGTCACAAGG-1 | GSM4626769 | OA |
| GSM4626769_GTCGTAAATCCCTAACC-1 | GSM4626769 | OA |
| GSM4626769_GTCTCGTAGGATGCGT-1  | GSM4626769 | OA |
| GSM4626769_GTCTCGTAGTTAGGTA-1  | GSM4626769 | OA |
| GSM4626769_GTCTCGTAGTTCGCAT-1  | GSM4626769 | OA |
| GSM4626769_GTCTCGTCACACCGAC-1  | GSM4626769 | OA |
| GSM4626769_GTCTCGTCACATTCTGA-1 | GSM4626769 | OA |
| GSM4626769_GTCTCGTCATAGAAAC-1  | GSM4626769 | OA |
| GSM4626769_GTCTCGTGTTAGTGGG-1  | GSM4626769 | OA |
| GSM4626769_GTCTCGTTCGTACCGG-1  | GSM4626769 | OA |
| GSM4626769_GTCTCGTTCACCTGC-1   | GSM4626769 | OA |
| GSM4626769_GTCTTCGAGAAACCGC-1  | GSM4626769 | OA |
| GSM4626769_GTCTTCGAGCTAGTTC-1  | GSM4626769 | OA |
| GSM4626769_GTCTTCGCAATAACGA-1  | GSM4626769 | OA |
| GSM4626769_GTCTTCGGTACCATCA-1  | GSM4626769 | OA |
| GSM4626769_GTCTTCGGTCAAACCTC-1 | GSM4626769 | OA |
| GSM4626769_GTCTTCGGTCCGTTAA-1  | GSM4626769 | OA |
| GSM4626769_GTCTTCGGTCTGAATCT-1 | GSM4626769 | OA |
| GSM4626769_GTCTTCGGTGCGAAAC-1  | GSM4626769 | OA |
| GSM4626769_GTGAAGGCATCGGGTC-1  | GSM4626769 | OA |
| GSM4626769_GTGAAGGGTGTGGCTC-1  | GSM4626769 | OA |
| GSM4626769_GTGAAGGTCCACGACG-1  | GSM4626769 | OA |
| GSM4626769_GTGAAGGTCTAGCACA-1  | GSM4626769 | OA |
| GSM4626769_GTGAAGGTCTGTCAAG-1  | GSM4626769 | OA |
| GSM4626769_GTGCAGCAGCGATCCC-1  | GSM4626769 | OA |
| GSM4626769_GTGCAGCAGTACGTTCC-1 | GSM4626769 | OA |

|                                |            |    |
|--------------------------------|------------|----|
| GSM4626769_GTGCAGCAGTGGAGAA-1  | GSM4626769 | OA |
| GSM4626769_GTGCAGCCATGGGACA-1  | GSM4626769 | OA |
| GSM4626769_GTGCAGCTCAGCGATT-1  | GSM4626769 | OA |
| GSM4626769_GTGCATAAGATCTGCT-1  | GSM4626769 | OA |
| GSM4626769_GTGCATACACATTAGC-1  | GSM4626769 | OA |
| GSM4626769_GTGCATACAGACAAGC-1  | GSM4626769 | OA |
| GSM4626769_GTGCATACATCCCACT-1  | GSM4626769 | OA |
| GSM4626769_GTGCATAGTAGCGCTC-1  | GSM4626769 | OA |
| GSM4626769_GTGCATAGTATCGCAT-1  | GSM4626769 | OA |
| GSM4626769_GTGCATAGTTATTCTC-1  | GSM4626769 | OA |
| GSM4626769_GTGCATATCGCAAGCC-1  | GSM4626769 | OA |
| GSM4626769_GTGCATATCTTGTACT-1  | GSM4626769 | OA |
| GSM4626769_GTGCGGTAGAGACTAT-1  | GSM4626769 | OA |
| GSM4626769_GTGCGGTAGCACCGCT-1  | GSM4626769 | OA |
| GSM4626769_GTGCGGTAGCATGGCA-1  | GSM4626769 | OA |
| GSM4626769_GTGCGGTAGGAGCGTT-1  | GSM4626769 | OA |
| GSM4626769_GTGCGGTCAGTCGATT-1  | GSM4626769 | OA |
| GSM4626769_GTGCGGTCAGTGGGAT-1  | GSM4626769 | OA |
| GSM4626769_GTGCGGTGTCATCGGC-1  | GSM4626769 | OA |
| GSM4626769_GTGCGGTGTCTTGCGG-1  | GSM4626769 | OA |
| GSM4626769_GTGCGGTTACGAAGG-1   | GSM4626769 | OA |
| GSM4626769_GTGCGGTTCTTTACAC-1  | GSM4626769 | OA |
| GSM4626769_GTGCTTCAGCTGTTCA-1  | GSM4626769 | OA |
| GSM4626769_GTGCTTCAGGACAGCT-1  | GSM4626769 | OA |
| GSM4626769_GTGCTTCGTACAGTGG-1  | GSM4626769 | OA |
| GSM4626769_GTGCTTCGTTGAGGTG-1  | GSM4626769 | OA |
| GSM4626769_GTGCTTCTCAAACAC-1   | GSM4626769 | OA |
| GSM4626769_GTGGGTCAGAGGGATA-1  | GSM4626769 | OA |
| GSM4626769_GTGGGTCAGCCGGTAA-1  | GSM4626769 | OA |
| GSM4626769_GTGGGTCCACCGATAT-1  | GSM4626769 | OA |
| GSM4626769_GTGGGTCTCTGCGACG-1  | GSM4626769 | OA |
| GSM4626769_GTGTGCGAGATGTTAG-1  | GSM4626769 | OA |
| GSM4626769_GTGTGCGAGTGCAAGC-1  | GSM4626769 | OA |
| GSM4626769_GTGTGCGTCCCAAGAT-1  | GSM4626769 | OA |
| GSM4626769_GTGTGCGTCGGCCGAT-1  | GSM4626769 | OA |
| GSM4626769_GTGTTAGAGAATGTGT-1  | GSM4626769 | OA |
| GSM4626769_GTGTTAGAGGCCGAAT-1  | GSM4626769 | OA |
| GSM4626769_GTGTTAGCAACACCTA-1  | GSM4626769 | OA |
| GSM4626769_GTGTTAGCAAGCTGAG-1  | GSM4626769 | OA |
| GSM4626769_GTGTTAGCACTATCTT-1  | GSM4626769 | OA |
| GSM4626769_GTGTTAGCATTACGAC-1  | GSM4626769 | OA |
| GSM4626769_GTGTTAGGTTCGCATCG-1 | GSM4626769 | OA |
| GSM4626769_GTTAAGCAGCTTATCG-1  | GSM4626769 | OA |
| GSM4626769_GTTAAGCAGGGCTTCC-1  | GSM4626769 | OA |
| GSM4626769_GTTAAGCAGTAGCCGA-1  | GSM4626769 | OA |
| GSM4626769_GTTAAGCCATGTTGT-1   | GSM4626769 | OA |
| GSM4626769_GTTAAGCGTACACCGC-1  | GSM4626769 | OA |
| GSM4626769_GTTAAGCGTGTTCGAT-1  | GSM4626769 | OA |
| GSM4626769_GTTAAGCTCAAAGACA-1  | GSM4626769 | OA |
| GSM4626769_GTTAAGCTCCAACCA-1   | GSM4626769 | OA |
| GSM4626769_GTTAAGCTCTCGCATC-1  | GSM4626769 | OA |
| GSM4626769_GTTAAGCTCTTACCGC-1  | GSM4626769 | OA |
| GSM4626769_GTTACAGAGGAGTTGC-1  | GSM4626769 | OA |
| GSM4626769_GTTACAGAGTAACCCCT-1 | GSM4626769 | OA |
| GSM4626769_GTTACAGAGTGGTAAT-1  | GSM4626769 | OA |
| GSM4626769_GTTACAGCAAGCTGTT-1  | GSM4626769 | OA |
| GSM4626769_GTTACAGCACAGTTTT-1  | GSM4626769 | OA |

|                                |            |    |
|--------------------------------|------------|----|
| GSM4626769_GTTACAGGTCAACATC-1  | GSM4626769 | OA |
| GSM4626769_GTTACAGGTCTCATCC-1  | GSM4626769 | OA |
| GSM4626769_GTTACAGGTTGGTGA-1   | GSM4626769 | OA |
| GSM4626769_GTTACAGTCACATGCA-1  | GSM4626769 | OA |
| GSM4626769_GTTACAGTCGCGATCG-1  | GSM4626769 | OA |
| GSM4626769_GTTACAGTCGCTTAGA-1  | GSM4626769 | OA |
| GSM4626769_GTTACAGTCTGTCAAG-1  | GSM4626769 | OA |
| GSM4626769_GTTACAGTCTTAGAGC-1  | GSM4626769 | OA |
| GSM4626769_GTTCATTAGCTACCTA-1  | GSM4626769 | OA |
| GSM4626769_GTTCATTAGTACTTGC-1  | GSM4626769 | OA |
| GSM4626769_GTTCATTAGTCCCACG-1  | GSM4626769 | OA |
| GSM4626769_GTTCATTAGATCTGT-1   | GSM4626769 | OA |
| GSM4626769_GTTCATTGTACATCCA-1  | GSM4626769 | OA |
| GSM4626769_GTTCATTTCGTAGGTT-1  | GSM4626769 | OA |
| GSM4626769_GTTCGGGAGACCGGAT-1  | GSM4626769 | OA |
| GSM4626769_GTTCGGGAGGTTCCCTA-1 | GSM4626769 | OA |
| GSM4626769_GTTCGGGGTTGGTTTG-1  | GSM4626769 | OA |
| GSM4626769_GTTCGGGTCCCTCAGT-1  | GSM4626769 | OA |
| GSM4626769_GTTCGGGTCTCAAACG-1  | GSM4626769 | OA |
| GSM4626769_GTTCTCGAGGCTATCT-1  | GSM4626769 | OA |
| GSM4626769_GTTCTCGGTCTCCATC-1  | GSM4626769 | OA |
| GSM4626769_GTTCTCGGTCTTTAT-1   | GSM4626769 | OA |
| GSM4626769_GTTCTCGGTGATAAGT-1  | GSM4626769 | OA |
| GSM4626769_GTTTCTAGTGAGCGAT-1  | GSM4626769 | OA |
| GSM4626769_GTTTCTAGTTATCCGA-1  | GSM4626769 | OA |
| GSM4626769_GTTTCTATCCTATGTT-1  | GSM4626769 | OA |
| GSM4626769_GTTTCTATCTATCCCG-1  | GSM4626769 | OA |
| GSM4626769_TAAACCGAGTACACCT-1  | GSM4626769 | OA |
| GSM4626769_TAAACCGAGTACATGA-1  | GSM4626769 | OA |
| GSM4626769_TAAACCGCACATGTGT-1  | GSM4626769 | OA |
| GSM4626769_TAAACCGCAGACACTT-1  | GSM4626769 | OA |
| GSM4626769_TAAACCGCAGAGTGTG-1  | GSM4626769 | OA |
| GSM4626769_TAAACCGCAGTATGCT-1  | GSM4626769 | OA |
| GSM4626769_TAAACCGGTGTGCGTC-1  | GSM4626769 | OA |
| GSM4626769_TAAACCGGTTAAGACA-1  | GSM4626769 | OA |
| GSM4626769_TAAACCGTCATCTGCC-1  | GSM4626769 | OA |
| GSM4626769_TAAACCGTCTCGCTTG-1  | GSM4626769 | OA |
| GSM4626769_TAAGAGAAGCGATTCT-1  | GSM4626769 | OA |
| GSM4626769_TAAGAGAGTAGAGTGC-1  | GSM4626769 | OA |
| GSM4626769_TAAGAGAGTAGCCTCG-1  | GSM4626769 | OA |
| GSM4626769_TAAGAGAGTTGAACTC-1  | GSM4626769 | OA |
| GSM4626769_TAAGAGATCCGCAAGC-1  | GSM4626769 | OA |
| GSM4626769_TAAGAGATCTCACATT-1  | GSM4626769 | OA |
| GSM4626769_TAAGCGTAGAAGGACA-1  | GSM4626769 | OA |
| GSM4626769_TAAGCGTAGTGGTCCC-1  | GSM4626769 | OA |
| GSM4626769_TAAGCGTCAACACCTA-1  | GSM4626769 | OA |
| GSM4626769_TAAGCGTCAAGTCTGT-1  | GSM4626769 | OA |
| GSM4626769_TAAGCGTCAGTCTTCC-1  | GSM4626769 | OA |
| GSM4626769_TAAGCGTTCAAACCGT-1  | GSM4626769 | OA |
| GSM4626769_TAAGCGTTCAAAGTAG-1  | GSM4626769 | OA |
| GSM4626769_TAAGTGCCAGATCGGA-1  | GSM4626769 | OA |
| GSM4626769_TAAGTGCGTAGCAAAT-1  | GSM4626769 | OA |
| GSM4626769_TAAGTGCGTAGTACCT-1  | GSM4626769 | OA |
| GSM4626769_TAAGTGCTCGCCTGTT-1  | GSM4626769 | OA |
| GSM4626769_TACACGAAGACATAAC-1  | GSM4626769 | OA |
| GSM4626769_TACACGAAGAGGGCTT-1  | GSM4626769 | OA |
| GSM4626769_TACACGATCCAAACTG-1  | GSM4626769 | OA |

|                                |            |    |
|--------------------------------|------------|----|
| GSM4626769_TACAGTGAGCGGCTTC-1  | GSM4626769 | OA |
| GSM4626769_TACAGTGAGTTTCGATC-1 | GSM4626769 | OA |
| GSM4626769_TACAGTGCAAATTGCC-1  | GSM4626769 | OA |
| GSM4626769_TACAGTGGTTACGGAG-1  | GSM4626769 | OA |
| GSM4626769_TACAGTGTCTGGGCCA-1  | GSM4626769 | OA |
| GSM4626769_TACCTATAGCTGAAAT-1  | GSM4626769 | OA |
| GSM4626769_TACCTATAGGAGTTTA-1  | GSM4626769 | OA |
| GSM4626769_TACCTATAGTATCTCG-1  | GSM4626769 | OA |
| GSM4626769_TACCTATAGTGAAGTT-1  | GSM4626769 | OA |
| GSM4626769_TACCTATAGTGTCTCA-1  | GSM4626769 | OA |
| GSM4626769_TACCTATCATCCATC-1   | GSM4626769 | OA |
| GSM4626769_TACCTATGTCCGTGAC-1  | GSM4626769 | OA |
| GSM4626769_TACCTATTCCACGTTT-1  | GSM4626769 | OA |
| GSM4626769_TACCTATTCCGACTCT-1  | GSM4626769 | OA |
| GSM4626769_TACCTTAAGGATGGTC-1  | GSM4626769 | OA |
| GSM4626769_TACCTTAAGTGTGAAT-1  | GSM4626769 | OA |
| GSM4626769_TACCTTACACGCCAGT-1  | GSM4626769 | OA |
| GSM4626769_TACCTTAGTTCACCTC-1  | GSM4626769 | OA |
| GSM4626769_TACCTTATCCAGTATG-1  | GSM4626769 | OA |
| GSM4626769_TACCTTATCTGTCTCG-1  | GSM4626769 | OA |
| GSM4626769_TACCTTATCTTAGCCC-1  | GSM4626769 | OA |
| GSM4626769_TACGGATAGTGCCTGA-1  | GSM4626769 | OA |
| GSM4626769_TACGGATCAGCTGTTA-1  | GSM4626769 | OA |
| GSM4626769_TACGGATGTCTCTCGT-1  | GSM4626769 | OA |
| GSM4626769_TACGGATGTTGTGGAG-1  | GSM4626769 | OA |
| GSM4626769_TACGGATTCTCATT-1    | GSM4626769 | OA |
| GSM4626769_TACGGATTCCGCCCTTA-1 | GSM4626769 | OA |
| GSM4626769_TACGGGCAGCGACGTA-1  | GSM4626769 | OA |
| GSM4626769_TACGGGCCATCACGTA-1  | GSM4626769 | OA |
| GSM4626769_TACGGGCCATCGTCGG-1  | GSM4626769 | OA |
| GSM4626769_TACGGGCCATCTCCCA-1  | GSM4626769 | OA |
| GSM4626769_TACGGGCGTTGAACTC-1  | GSM4626769 | OA |
| GSM4626769_TACGGGCTCACTTCAT-1  | GSM4626769 | OA |
| GSM4626769_TACGGGCTCAGCATGT-1  | GSM4626769 | OA |
| GSM4626769_TACGGGCTCCGCATCT-1  | GSM4626769 | OA |
| GSM4626769_TACGGTAAGCGTTGCC-1  | GSM4626769 | OA |
| GSM4626769_TACGGTAAGGGCATGT-1  | GSM4626769 | OA |
| GSM4626769_TACGGTACAACCTGGCC-1 | GSM4626769 | OA |
| GSM4626769_TACGGTACACGACTCG-1  | GSM4626769 | OA |
| GSM4626769_TACGGTAGTCAAAGCG-1  | GSM4626769 | OA |
| GSM4626769_TACGGTAGTCTTGCC-1   | GSM4626769 | OA |
| GSM4626769_TACGGTAGTGAACCTT-1  | GSM4626769 | OA |
| GSM4626769_TACGGTAGTTAGATGA-1  | GSM4626769 | OA |
| GSM4626769_TACGGTATCATCGGAT-1  | GSM4626769 | OA |
| GSM4626769_TACTCATCATGCCTTC-1  | GSM4626769 | OA |
| GSM4626769_TACTCATGTGCGCTTG-1  | GSM4626769 | OA |
| GSM4626769_TACTCATTCCGGTTAAC-1 | GSM4626769 | OA |
| GSM4626769_TACTCGCAGCTAAGAT-1  | GSM4626769 | OA |
| GSM4626769_TACTCGCAGGCGATAC-1  | GSM4626769 | OA |
| GSM4626769_TACTCGCCACCAGATT-1  | GSM4626769 | OA |
| GSM4626769_TACTCGCGTAGAAGGA-1  | GSM4626769 | OA |
| GSM4626769_TACTCGCGTATTCTGTG-1 | GSM4626769 | OA |
| GSM4626769_TACTCGCTCTCAACTT-1  | GSM4626769 | OA |
| GSM4626769_TACTTACCATACGCTA-1  | GSM4626769 | OA |
| GSM4626769_TACTTACGTAGAGCTG-1  | GSM4626769 | OA |
| GSM4626769_TACTTACGTCTAGCCG-1  | GSM4626769 | OA |
| GSM4626769_TACTTACGTTAGGGTG-1  | GSM4626769 | OA |

|                                 |            |    |
|---------------------------------|------------|----|
| GSM4626769_TACTTACTCACAACGT-1   | GSM4626769 | OA |
| GSM4626769_TACTTGTAGACTACAA-1   | GSM4626769 | OA |
| GSM4626769_TACTTGTAGGTAGCTG-1   | GSM4626769 | OA |
| GSM4626769_TACTTGTCAATGAATG-1   | GSM4626769 | OA |
| GSM4626769_TACTTGTACAGGAGT-1    | GSM4626769 | OA |
| GSM4626769_TACTTGTGCTTCGG-1     | GSM4626769 | OA |
| GSM4626769_TACTTGTGTCATCGATGT-1 | GSM4626769 | OA |
| GSM4626769_TACTTGTGTCTAGTGT-1   | GSM4626769 | OA |
| GSM4626769_TACTTGTGTCTCCACT-1   | GSM4626769 | OA |
| GSM4626769_TACTTGTTCGAAGCCG-1   | GSM4626769 | OA |
| GSM4626769_TACTTGTTCGCGTTTC-1   | GSM4626769 | OA |
| GSM4626769_TAGACCAAGACGCACA-1   | GSM4626769 | OA |
| GSM4626769_TAGACCAAGTCTCCTC-1   | GSM4626769 | OA |
| GSM4626769_TAGACCACAATCTACG-1   | GSM4626769 | OA |
| GSM4626769_TAGACCATCCCAACGG-1   | GSM4626769 | OA |
| GSM4626769_TAGAGCTAGATCCCAT-1   | GSM4626769 | OA |
| GSM4626769_TAGAGCTAGGTACTCT-1   | GSM4626769 | OA |
| GSM4626769_TAGAGCTAGTCCATAC-1   | GSM4626769 | OA |
| GSM4626769_TAGAGCTAGTGTGGCA-1   | GSM4626769 | OA |
| GSM4626769_TAGAGCTCACAAGTGT-1   | GSM4626769 | OA |
| GSM4626769_TAGAGCTCACGAAGCA-1   | GSM4626769 | OA |
| GSM4626769_TAGAGCTCACTTGGAT-1   | GSM4626769 | OA |
| GSM4626769_TAGAGCTCATCCCACT-1   | GSM4626769 | OA |
| GSM4626769_TAGAGCTGTAATTGGA-1   | GSM4626769 | OA |
| GSM4626769_TAGAGCTGTTGAGGTG-1   | GSM4626769 | OA |
| GSM4626769_TAGCCGGAGAGGTTAT-1   | GSM4626769 | OA |
| GSM4626769_TAGCCGGAGTACGCC-1    | GSM4626769 | OA |
| GSM4626769_TAGCCGGAGTGTACCT-1   | GSM4626769 | OA |
| GSM4626769_TAGCCGGCAAGACGTG-1   | GSM4626769 | OA |
| GSM4626769_TAGCCGGCACAGCGTC-1   | GSM4626769 | OA |
| GSM4626769_TAGCCGGCACTCGACG-1   | GSM4626769 | OA |
| GSM4626769_TAGCCGGCAGACAAGC-1   | GSM4626769 | OA |
| GSM4626769_TAGCCGGGTACCGTAT-1   | GSM4626769 | OA |
| GSM4626769_TAGCCGGGTATGCTTG-1   | GSM4626769 | OA |
| GSM4626769_TAGCCGGGTCTAACGT-1   | GSM4626769 | OA |
| GSM4626769_TAGCCGGGTGGACGAT-1   | GSM4626769 | OA |
| GSM4626769_TAGCCGGTCTCCAACC-1   | GSM4626769 | OA |
| GSM4626769_TAGGCATCACTGTGTA-1   | GSM4626769 | OA |
| GSM4626769_TAGGCATCACTTAAGC-1   | GSM4626769 | OA |
| GSM4626769_TAGGCATCAGAGTGTG-1   | GSM4626769 | OA |
| GSM4626769_TAGGCATGTGCACCAC-1   | GSM4626769 | OA |
| GSM4626769_TAGGCATGTGCCTTGG-1   | GSM4626769 | OA |
| GSM4626769_TAGGCATTCTTGTGTTG-1  | GSM4626769 | OA |
| GSM4626769_TAGTGGTAGAGTTGGC-1   | GSM4626769 | OA |
| GSM4626769_TAGTGGTAGTACACCT-1   | GSM4626769 | OA |
| GSM4626769_TAGTGGTAGTGTCCCG-1   | GSM4626769 | OA |
| GSM4626769_TAGTGGTCAATGGATA-1   | GSM4626769 | OA |
| GSM4626769_TAGTGGTCAATGTAAG-1   | GSM4626769 | OA |
| GSM4626769_TAGTGGTCACCGGAAA-1   | GSM4626769 | OA |
| GSM4626769_TAGTGGTCAGACGCAA-1   | GSM4626769 | OA |
| GSM4626769_TAGTGGTCAGGCTGAA-1   | GSM4626769 | OA |
| GSM4626769_TAGTGGTGTGATGCCG-1   | GSM4626769 | OA |
| GSM4626769_TAGTGGTGTGTTGTTTG-1  | GSM4626769 | OA |
| GSM4626769_TAGTGGTTCACAAACC-1   | GSM4626769 | OA |
| GSM4626769_TAGTGGTCTGCGGCA-1    | GSM4626769 | OA |
| GSM4626769_TAGTTGGAGGTTACCT-1   | GSM4626769 | OA |
| GSM4626769_TAGTTGGAGTACATGA-1   | GSM4626769 | OA |

|                               |            |    |
|-------------------------------|------------|----|
| GSM4626769_TAGTTGGAGTTAGCGG-1 | GSM4626769 | OA |
| GSM4626769_TAGTTGGCATTGTGCA-1 | GSM4626769 | OA |
| GSM4626769_TAGTTGGGTAAGAGGA-1 | GSM4626769 | OA |
| GSM4626769_TAGTTGGGTCCAGTAT-1 | GSM4626769 | OA |
| GSM4626769_TAGTTGGGTCCGATCC-1 | GSM4626769 | OA |
| GSM4626769_TAGTTGGTCCAGTATG-1 | GSM4626769 | OA |
| GSM4626769_TAGTTGGTCGCTGATA-1 | GSM4626769 | OA |
| GSM4626769_TATCAGGCAGAGCCAA-1 | GSM4626769 | OA |
| GSM4626769_TATCAGGTCCGCAGTG-1 | GSM4626769 | OA |
| GSM4626769_TATCAGGTCTTGCAAG-1 | GSM4626769 | OA |
| GSM4626769_TATCAGGTCTTGTATC-1 | GSM4626769 | OA |
| GSM4626769_TATCTCAAGGACATTA-1 | GSM4626769 | OA |
| GSM4626769_TATCTCACAAACAACA-1 | GSM4626769 | OA |
| GSM4626769_TATCTCACAAAGTGCG-1 | GSM4626769 | OA |
| GSM4626769_TATCTCACATCTCCCA-1 | GSM4626769 | OA |
| GSM4626769_TATCTCAGTAACGTTT-1 | GSM4626769 | OA |
| GSM4626769_TATCTCATCCCGACTT-1 | GSM4626769 | OA |
| GSM4626769_TATCTCATCTTGCCGT-1 | GSM4626769 | OA |
| GSM4626769_TATGCCCCACACCGAC-1 | GSM4626769 | OA |
| GSM4626769_TATGCCCCATCTCGCT-1 | GSM4626769 | OA |
| GSM4626769_TATGCCCTCAGAAATG-1 | GSM4626769 | OA |
| GSM4626769_TATGCCCTCCCTTGTG-1 | GSM4626769 | OA |
| GSM4626769_TATGCCCTCTAACGGT-1 | GSM4626769 | OA |
| GSM4626769_TATGCCCTCTGTTTGT-1 | GSM4626769 | OA |
| GSM4626769_TATTACCGTTGTACAC-1 | GSM4626769 | OA |
| GSM4626769_TATTACCTCGGCGCAT-1 | GSM4626769 | OA |
| GSM4626769_TATTACCTCTCGTTTA-1 | GSM4626769 | OA |
| GSM4626769_TCAACGAAGCGTAATA-1 | GSM4626769 | OA |
| GSM4626769_TCAACGAAGTCCATAC-1 | GSM4626769 | OA |
| GSM4626769_TCAACGAAGTCTTGCA-1 | GSM4626769 | OA |
| GSM4626769_TCAACGAGTATAATGG-1 | GSM4626769 | OA |
| GSM4626769_TCAACGAGTCCAGTGC-1 | GSM4626769 | OA |
| GSM4626769_TCAACGAGTGCAACTT-1 | GSM4626769 | OA |
| GSM4626769_TCAACGATCAGTGTTG-1 | GSM4626769 | OA |
| GSM4626769_TCAATCTAGATCACGG-1 | GSM4626769 | OA |
| GSM4626769_TCAATCTCAAGCCTAT-1 | GSM4626769 | OA |
| GSM4626769_TCAATCTCAGGTGCCT-1 | GSM4626769 | OA |
| GSM4626769_TCAATCTGTTCCACAA-1 | GSM4626769 | OA |
| GSM4626769_TCACAAGAGAATTGTG-1 | GSM4626769 | OA |
| GSM4626769_TCACAAGAGCAACGGT-1 | GSM4626769 | OA |
| GSM4626769_TCACAAGCAAGGGTCA-1 | GSM4626769 | OA |
| GSM4626769_TCACAAGCATGTAAGA-1 | GSM4626769 | OA |
| GSM4626769_TCACAAGGTTACCGAT-1 | GSM4626769 | OA |
| GSM4626769_TCACAAGTCGCCATAA-1 | GSM4626769 | OA |
| GSM4626769_TCACGAAAGCCGGTAA-1 | GSM4626769 | OA |
| GSM4626769_TCACGAACAGAGCCAA-1 | GSM4626769 | OA |
| GSM4626769_TCACGAACATGGTCTA-1 | GSM4626769 | OA |
| GSM4626769_TCACGAAGTAACGTTT-1 | GSM4626769 | OA |
| GSM4626769_TCACGAAGTACGCACC-1 | GSM4626769 | OA |
| GSM4626769_TCACGAAGTGATGTCT-1 | GSM4626769 | OA |
| GSM4626769_TCACGAATCCCTTGCA-1 | GSM4626769 | OA |
| GSM4626769_TCAGATGCAATGTAAG-1 | GSM4626769 | OA |
| GSM4626769_TCAGATGCATTCTCAT-1 | GSM4626769 | OA |
| GSM4626769_TCAGCAACAAAGCGGT-1 | GSM4626769 | OA |
| GSM4626769_TCAGCAACAGGCAGTA-1 | GSM4626769 | OA |
| GSM4626769_TCAGCAAGTGCCTTG-1  | GSM4626769 | OA |
| GSM4626769_TCAGCAATCCAGTATG-1 | GSM4626769 | OA |

|                               |            |    |
|-------------------------------|------------|----|
| GSM4626769_TCAGCTCAGCATGGCA-1 | GSM4626769 | OA |
| GSM4626769_TCAGCTCCAAGAGTCG-1 | GSM4626769 | OA |
| GSM4626769_TCAGCTCGTCAGCTAT-1 | GSM4626769 | OA |
| GSM4626769_TCAGCTCGTCGAGTTT-1 | GSM4626769 | OA |
| GSM4626769_TCAGCTCGTGATGCC-1  | GSM4626769 | OA |
| GSM4626769_TCAGCTCTCTCGCTTG-1 | GSM4626769 | OA |
| GSM4626769_TCAGGATAGTGCGATG-1 | GSM4626769 | OA |
| GSM4626769_TCAGGATGTAAGCACG-1 | GSM4626769 | OA |
| GSM4626769_TCAGGATGTACAAGTA-1 | GSM4626769 | OA |
| GSM4626769_TCAGGATGTACTTCTT-1 | GSM4626769 | OA |
| GSM4626769_TCAGGATTCTGTACC-1  | GSM4626769 | OA |
| GSM4626769_TCAGGATTCTGTTGAG-1 | GSM4626769 | OA |
| GSM4626769_TCAGGTAAGCGTTTAC-1 | GSM4626769 | OA |
| GSM4626769_TCAGGTACATTGACA-1  | GSM4626769 | OA |
| GSM4626769_TCAGGTAGTCCAGTAT-1 | GSM4626769 | OA |
| GSM4626769_TCAGGTATCAAGGCTT-1 | GSM4626769 | OA |
| GSM4626769_TCAGGTATCCTCAATT-1 | GSM4626769 | OA |
| GSM4626769_TCAGGTATCTTCGAGA-1 | GSM4626769 | OA |
| GSM4626769_TCATTACAGACGCAAC-1 | GSM4626769 | OA |
| GSM4626769_TCATTACAGTAATCCC-1 | GSM4626769 | OA |
| GSM4626769_TCATTACCACATCCGG-1 | GSM4626769 | OA |
| GSM4626769_TCATTACCACCCATTC-1 | GSM4626769 | OA |
| GSM4626769_TCATTACCATCGACGC-1 | GSM4626769 | OA |
| GSM4626769_TCATTACCATCGGTTA-1 | GSM4626769 | OA |
| GSM4626769_TCATTACGTAAGAGGA-1 | GSM4626769 | OA |
| GSM4626769_TCATTACTCGTCTGCT-1 | GSM4626769 | OA |
| GSM4626769_TCATTTGAGAGGTTGC-1 | GSM4626769 | OA |
| GSM4626769_TCATTTGCATGTAAGA-1 | GSM4626769 | OA |
| GSM4626769_TCATTTGGTAAACCTC-1 | GSM4626769 | OA |
| GSM4626769_TCATTTGGTGGTCCGT-1 | GSM4626769 | OA |
| GSM4626769_TCATTTGTCCACGACG-1 | GSM4626769 | OA |
| GSM4626769_TCATTTGTCCCTAATT-1 | GSM4626769 | OA |
| GSM4626769_TCCACACAGAGAACAG-1 | GSM4626769 | OA |
| GSM4626769_TCCACACCAGACAAGC-1 | GSM4626769 | OA |
| GSM4626769_TCCACACGTTACGGC-1  | GSM4626769 | OA |
| GSM4626769_TCCACACGTTGAGGTG-1 | GSM4626769 | OA |
| GSM4626769_TCCACACGTTTACTCT-1 | GSM4626769 | OA |
| GSM4626769_TCCCACTCATCGCTC-1  | GSM4626769 | OA |
| GSM4626769_TCCCGATAGATCCTGT-1 | GSM4626769 | OA |
| GSM4626769_TCCCGATAGATGCGAC-1 | GSM4626769 | OA |
| GSM4626769_TCCCGATCAAACCTAC-1 | GSM4626769 | OA |
| GSM4626769_TCCCGATCAAAGTCAA-1 | GSM4626769 | OA |
| GSM4626769_TCCCGATGTACTCTCC-1 | GSM4626769 | OA |
| GSM4626769_TCCCGATGTGAAGGCT-1 | GSM4626769 | OA |
| GSM4626769_TCCCGATTCCGGCACA-1 | GSM4626769 | OA |
| GSM4626769_TCGAGGCAGATGGCGT-1 | GSM4626769 | OA |
| GSM4626769_TCGAGGCCAAGTAATG-1 | GSM4626769 | OA |
| GSM4626769_TCGAGGCCACCGAATT-1 | GSM4626769 | OA |
| GSM4626769_TCGAGGCCACTGAAGG-1 | GSM4626769 | OA |
| GSM4626769_TCGAGGCCATATACGC-1 | GSM4626769 | OA |
| GSM4626769_TCGAGGCGTAGAAGGA-1 | GSM4626769 | OA |
| GSM4626769_TCGAGGCGTTCGTGAT-1 | GSM4626769 | OA |
| GSM4626769_TCGAGGCTCCACTGGG-1 | GSM4626769 | OA |
| GSM4626769_TCGAGGCTCGTGCTCG-1 | GSM4626769 | OA |
| GSM4626769_TCGCGAGAGAGCTATA-1 | GSM4626769 | OA |
| GSM4626769_TCGCGAGAGCTTCGCG-1 | GSM4626769 | OA |
| GSM4626769_TCGCGAGAGGTCATCT-1 | GSM4626769 | OA |



|                                |            |    |
|--------------------------------|------------|----|
| GSM4626769_TCGCGAGCATGACATC-1  | GSM4626769 | OA |
| GSM4626769_TCGCGAGTCTTTAGTC-1  | GSM4626769 | OA |
| GSM4626769_TCGCGTTAGCAGATCG-1  | GSM4626769 | OA |
| GSM4626769_TCGCGTTAGGTGACCA-1  | GSM4626769 | OA |
| GSM4626769_TCGCGTTCACGACGAA-1  | GSM4626769 | OA |
| GSM4626769_TCGCGTTCAGCATACT-1  | GSM4626769 | OA |
| GSM4626769_TCGCGTTCAGTCAGCC-1  | GSM4626769 | OA |
| GSM4626769_TCGCGTTGTGAGGGTT-1  | GSM4626769 | OA |
| GSM4626769_TCGGGACGTCAGCTAT-1  | GSM4626769 | OA |
| GSM4626769_TCGGGACGTCCTCTTG-1  | GSM4626769 | OA |
| GSM4626769_TCGGGACGTGTATGGG-1  | GSM4626769 | OA |
| GSM4626769_TCGGTAAAGGCTCTTA-1  | GSM4626769 | OA |
| GSM4626769_TCGGTAAAGTCCTCCT-1  | GSM4626769 | OA |
| GSM4626769_TCGGTAACAAGCGATG-1  | GSM4626769 | OA |
| GSM4626769_TCGGTAACACTAAGTC-1  | GSM4626769 | OA |
| GSM4626769_TCGGTAACAGTCAGAG-1  | GSM4626769 | OA |
| GSM4626769_TCGGTAAGTGATGATA-1  | GSM4626769 | OA |
| GSM4626769_TCGGTAATCACAATGC-1  | GSM4626769 | OA |
| GSM4626769_TCGGTAATCAGTGTTG-1  | GSM4626769 | OA |
| GSM4626769_TCGGTAATCTTCATGT-1  | GSM4626769 | OA |
| GSM4626769_TCGTACCCAGCATACT-1  | GSM4626769 | OA |
| GSM4626769_TCGTACCCAGGCGATA-1  | GSM4626769 | OA |
| GSM4626769_TCGTACCGTAGATTAG-1  | GSM4626769 | OA |
| GSM4626769_TCGTAGAAGCTCCTTC-1  | GSM4626769 | OA |
| GSM4626769_TCGTAGAAGTGA CTCT-1 | GSM4626769 | OA |
| GSM4626769_TCGTAGAAGTGTCTCA-1  | GSM4626769 | OA |
| GSM4626769_TCGTAGAGTCTAGTGT-1  | GSM4626769 | OA |
| GSM4626769_TCGTAGAGTTCCAACA-1  | GSM4626769 | OA |
| GSM4626769_TCGTAGATCGGAGGTA-1  | GSM4626769 | OA |
| GSM4626769_TCGTAGATCTCCAACC-1  | GSM4626769 | OA |
| GSM4626769_TCTATTGAGAGCAATT-1  | GSM4626769 | OA |
| GSM4626769_TCTATTGAGAGTCGGT-1  | GSM4626769 | OA |
| GSM4626769_TCTATTGAGGCCGAAT-1  | GSM4626769 | OA |
| GSM4626769_TCTATTGAGTGGTAGC-1  | GSM4626769 | OA |
| GSM4626769_TCTATTGCACCCAGTG-1  | GSM4626769 | OA |
| GSM4626769_TCTATTGCAGCGTAAG-1  | GSM4626769 | OA |
| GSM4626769_TCTATTGCAGGCAGTA-1  | GSM4626769 | OA |
| GSM4626769_TCTATTGCATCGGTTA-1  | GSM4626769 | OA |
| GSM4626769_TCTATTGGTCATGCCG-1  | GSM4626769 | OA |
| GSM4626769_TCTCATAAGATCCCGC-1  | GSM4626769 | OA |
| GSM4626769_TCTCATAAGCTTTGGT-1  | GSM4626769 | OA |
| GSM4626769_TCTCATAAGTCACTA-1   | GSM4626769 | OA |
| GSM4626769_TCTCATAATCTCGCT-1   | GSM4626769 | OA |
| GSM4626769_TCTCATAAGTATAAACG-1 | GSM4626769 | OA |
| GSM4626769_TCTCATAAGTCTCGTTC-1 | GSM4626769 | OA |
| GSM4626769_TCTCATAAGTGCACCTA-1 | GSM4626769 | OA |
| GSM4626769_TCTCATAAGTTTGCATG-1 | GSM4626769 | OA |
| GSM4626769_TCTCTAAAGACCGGAT-1  | GSM4626769 | OA |
| GSM4626769_TCTCTAAAGGATATAC-1  | GSM4626769 | OA |
| GSM4626769_TCTCTAATCAGTACGT-1  | GSM4626769 | OA |
| GSM4626769_TCTCTAATCCGGCACA-1  | GSM4626769 | OA |
| GSM4626769_TCTCTAATCGGATGGA-1  | GSM4626769 | OA |
| GSM4626769_TCTCTAATCTGGAGCC-1  | GSM4626769 | OA |
| GSM4626769_TCTGAGAAGTGGAGAA-1  | GSM4626769 | OA |
| GSM4626769_TCTGAGATCACCTTAT-1  | GSM4626769 | OA |
| GSM4626769_TCTGGAAGTTATGCGT-1  | GSM4626769 | OA |
| GSM4626769_TCTGGAATCAGTGTTG-1  | GSM4626769 | OA |

|                                |            |    |
|--------------------------------|------------|----|
| GSM4626769_TCTTCGGCATTAGCCA-1  | GSM4626769 | OA |
| GSM4626769_TCTTCGGCATTCTCG-1   | GSM4626769 | OA |
| GSM4626769_TCTTCGGGTCCGTGAC-1  | GSM4626769 | OA |
| GSM4626769_TCTTCGGTCAGCTTAG-1  | GSM4626769 | OA |
| GSM4626769_TCTTCGGTCGTGGACC-1  | GSM4626769 | OA |
| GSM4626769_TCTTTCCAGCCACCTG-1  | GSM4626769 | OA |
| GSM4626769_TCTTTCCAGTCTCCTC-1  | GSM4626769 | OA |
| GSM4626769_TCTTTCCAGTGTCCCG-1  | GSM4626769 | OA |
| GSM4626769_TCTTTCCCAAGGTTTC-1  | GSM4626769 | OA |
| GSM4626769_TCTTTCCACCTCGGA-1   | GSM4626769 | OA |
| GSM4626769_TCTTTCCGTGGGTATG-1  | GSM4626769 | OA |
| GSM4626769_TCTTTCCCTCAGCACAT-1 | GSM4626769 | OA |
| GSM4626769_TCTTTCCCTCCTTGTC-1  | GSM4626769 | OA |
| GSM4626769_TGAAAGAAGTAACCCT-1  | GSM4626769 | OA |
| GSM4626769_TGAAAGACACCTCGTT-1  | GSM4626769 | OA |
| GSM4626769_TGAAAGACATCTCGCT-1  | GSM4626769 | OA |
| GSM4626769_TGAAAGATCATGTCCC-1  | GSM4626769 | OA |
| GSM4626769_TGAAAGATCGCCAGCA-1  | GSM4626769 | OA |
| GSM4626769_TGACAACAGATGGGTC-1  | GSM4626769 | OA |
| GSM4626769_TGACAACAGGCATTGG-1  | GSM4626769 | OA |
| GSM4626769_TGACAACCAACACCTA-1  | GSM4626769 | OA |
| GSM4626769_TGACAACCACTAGTAC-1  | GSM4626769 | OA |
| GSM4626769_TGACAACGTATTAGCC-1  | GSM4626769 | OA |
| GSM4626769_TGACAACGTATTAGC-1   | GSM4626769 | OA |
| GSM4626769_TGACAACGTCCAGTGC-1  | GSM4626769 | OA |
| GSM4626769_TGACAACGTTAAGTAG-1  | GSM4626769 | OA |
| GSM4626769_TGACAACCTCGGCCAA-1  | GSM4626769 | OA |
| GSM4626769_TGACGGCAGGCCGAAT-1  | GSM4626769 | OA |
| GSM4626769_TGACGGCAGTGTGGCA-1  | GSM4626769 | OA |
| GSM4626769_TGACGGCCAGTTAAC-1   | GSM4626769 | OA |
| GSM4626769_TGACGGCCATGCAATC-1  | GSM4626769 | OA |
| GSM4626769_TGACGGCTCGGAAATA-1  | GSM4626769 | OA |
| GSM4626769_TGACTAGAGCACGCCT-1  | GSM4626769 | OA |
| GSM4626769_TGACTAGCACATGGGA-1  | GSM4626769 | OA |
| GSM4626769_TGACTAGGTCAAACCTC-1 | GSM4626769 | OA |
| GSM4626769_TGACTAGGTTGGACCC-1  | GSM4626769 | OA |
| GSM4626769_TGACTTTAGTCATGCT-1  | GSM4626769 | OA |
| GSM4626769_TGACTTTAGTCTCCTC-1  | GSM4626769 | OA |
| GSM4626769_TGACTTTTCAACACAC-1  | GSM4626769 | OA |
| GSM4626769_TGACTTTTCACTTCAT-1  | GSM4626769 | OA |
| GSM4626769_TGACTTTTCCGGTGT-1   | GSM4626769 | OA |
| GSM4626769_TGACTTTTCTCCGTT-1   | GSM4626769 | OA |
| GSM4626769_TGAGAGGAGGATGGAA-1  | GSM4626769 | OA |
| GSM4626769_TGAGAGGAGGGTTCGAT-1 | GSM4626769 | OA |
| GSM4626769_TGAGAGGAGTAGCCGA-1  | GSM4626769 | OA |
| GSM4626769_TGAGAGGGTGTGAAAT-1  | GSM4626769 | OA |
| GSM4626769_TGAGAGGGTGTCTTT-1   | GSM4626769 | OA |
| GSM4626769_TGAGAGGGTTATTCTC-1  | GSM4626769 | OA |
| GSM4626769_TGAGAGGTTCGATGAGG-1 | GSM4626769 | OA |
| GSM4626769_TGAGAGGTCTGCGTAA-1  | GSM4626769 | OA |
| GSM4626769_TGAGCATAGCCGCTA-1   | GSM4626769 | OA |
| GSM4626769_TGAGCATGTCATCGGC-1  | GSM4626769 | OA |
| GSM4626769_TGAGCATGTCCATCCT-1  | GSM4626769 | OA |
| GSM4626769_TGAGCCGAGACGACGT-1  | GSM4626769 | OA |
| GSM4626769_TGAGCCGAGTTGAGTA-1  | GSM4626769 | OA |
| GSM4626769_TGAGCCGCACCGAATT-1  | GSM4626769 | OA |
| GSM4626769_TGAGCCGCATTTCACT-1  | GSM4626769 | OA |

|                                 |            |    |
|---------------------------------|------------|----|
| GSM4626769_TGAGCCGGTTTGGCGC-1   | GSM4626769 | OA |
| GSM4626769_TGAGCCGTCATAACCG-1   | GSM4626769 | OA |
| GSM4626769_TGAGCCGTCCAACCAA-1   | GSM4626769 | OA |
| GSM4626769_TGAGCCGTCCGTCATC-1   | GSM4626769 | OA |
| GSM4626769_TGAGGGAAGCAATCTC-1   | GSM4626769 | OA |
| GSM4626769_TGAGGGAAGGCGCTCT-1   | GSM4626769 | OA |
| GSM4626769_TGAGGGACAAGGTTCT-1   | GSM4626769 | OA |
| GSM4626769_TGAGGGACAAGTTTC-1    | GSM4626769 | OA |
| GSM4626769_TGAGGGACATCGGTTA-1   | GSM4626769 | OA |
| GSM4626769_TGAGGGAGTGTGACGA-1   | GSM4626769 | OA |
| GSM4626769_TGAGGGATCCCTGACT-1   | GSM4626769 | OA |
| GSM4626769_TGATTTTCAGAACAAATC-1 | GSM4626769 | OA |
| GSM4626769_TGATTTCCATCCGGGT-1   | GSM4626769 | OA |
| GSM4626769_TGATTTCTCAGGCGAA-1   | GSM4626769 | OA |
| GSM4626769_TGATTTCTCATGGTCA-1   | GSM4626769 | OA |
| GSM4626769_TGCACCTCAAGGCTCC-1   | GSM4626769 | OA |
| GSM4626769_TGCACCTCAGACAAGC-1   | GSM4626769 | OA |
| GSM4626769_TGCACCTTCAGTACGT-1   | GSM4626769 | OA |
| GSM4626769_TGCACCTTCCGAAGAG-1   | GSM4626769 | OA |
| GSM4626769_TGCACCTTCTCCAGGG-1   | GSM4626769 | OA |
| GSM4626769_TGCCAAAAGACCGGAT-1   | GSM4626769 | OA |
| GSM4626769_TGCCAAAAGACTAGAT-1   | GSM4626769 | OA |
| GSM4626769_TGCCAAACAGATCCAT-1   | GSM4626769 | OA |
| GSM4626769_TGCCAAACATTTCACT-1   | GSM4626769 | OA |
| GSM4626769_TGCCAAAGTCGCGAAA-1   | GSM4626769 | OA |
| GSM4626769_TGCCAAAGTTGGACCC-1   | GSM4626769 | OA |
| GSM4626769_TGCCAAATCGTGGACC-1   | GSM4626769 | OA |
| GSM4626769_TGCCAAATCTAACCGA-1   | GSM4626769 | OA |
| GSM4626769_TGCCAAATCTCATTCA-1   | GSM4626769 | OA |
| GSM4626769_TGCCCATAGACAAGCC-1   | GSM4626769 | OA |
| GSM4626769_TGCCCATAGCAGGTCA-1   | GSM4626769 | OA |
| GSM4626769_TGCCCATCAAGCCCAC-1   | GSM4626769 | OA |
| GSM4626769_TGCCCATCACAGTCGC-1   | GSM4626769 | OA |
| GSM4626769_TGCCCATCATATGGTC-1   | GSM4626769 | OA |
| GSM4626769_TGCCCATCATTCTCG-1    | GSM4626769 | OA |
| GSM4626769_TGCCCTAAGGGATACC-1   | GSM4626769 | OA |
| GSM4626769_TGCCCTACACGTTGGC-1   | GSM4626769 | OA |
| GSM4626769_TGCCCTACATCCCACT-1   | GSM4626769 | OA |
| GSM4626769_TGCCCTAGTACCGTAT-1   | GSM4626769 | OA |
| GSM4626769_TGCCCTAGTAGCTAAA-1   | GSM4626769 | OA |
| GSM4626769_TGCCCTAGTCATGCCG-1   | GSM4626769 | OA |
| GSM4626769_TGCCCTATCAAGGCTT-1   | GSM4626769 | OA |
| GSM4626769_TGCCCTATCGGATGTT-1   | GSM4626769 | OA |
| GSM4626769_TGCCCTATCTCGATGA-1   | GSM4626769 | OA |
| GSM4626769_TGCGCAGAGCAGGCTA-1   | GSM4626769 | OA |
| GSM4626769_TGCGCAGAGCTGAACG-1   | GSM4626769 | OA |
| GSM4626769_TGCGCAGAGGATGGAA-1   | GSM4626769 | OA |
| GSM4626769_TGCGCAGCAACACCCG-1   | GSM4626769 | OA |
| GSM4626769_TGCGCAGCACTACAGT-1   | GSM4626769 | OA |
| GSM4626769_TGCGCAGTCAAGCCTA-1   | GSM4626769 | OA |
| GSM4626769_TGCGCAGTCTGAGGGA-1   | GSM4626769 | OA |
| GSM4626769_TGCGGGTTCATGTTCCC-1  | GSM4626769 | OA |
| GSM4626769_TGCGGGTTCATTGGCGC-1  | GSM4626769 | OA |
| GSM4626769_TGCGGGTGTCCAGTGC-1   | GSM4626769 | OA |
| GSM4626769_TGCGGGTGTGCTTCTC-1   | GSM4626769 | OA |
| GSM4626769_TGCGGGTGTCTCATT-1    | GSM4626769 | OA |
| GSM4626769_TGCGGGTTCAAAGACA-1   | GSM4626769 | OA |

|                                |            |    |
|--------------------------------|------------|----|
| GSM4626769_TGCGGGTTCCATTCTA-1  | GSM4626769 | OA |
| GSM4626769_TGCGGGTTCTGCTGTC-1  | GSM4626769 | OA |
| GSM4626769_TGCGTGGAATCTACG-1   | GSM4626769 | OA |
| GSM4626769_TGCGTGGGTAGGACAC-1  | GSM4626769 | OA |
| GSM4626769_TGCGTGGGTGTGACCC-1  | GSM4626769 | OA |
| GSM4626769_TGCTACCAGCGGCTTC-1  | GSM4626769 | OA |
| GSM4626769_TGCTACCCAATCACAC-1  | GSM4626769 | OA |
| GSM4626769_TGCTACCGTCGGATCC-1  | GSM4626769 | OA |
| GSM4626769_TGCTACCGTCGGCTCA-1  | GSM4626769 | OA |
| GSM4626769_TGCTACCTCGCATGGC-1  | GSM4626769 | OA |
| GSM4626769_TGCTACCTCGTTACAG-1  | GSM4626769 | OA |
| GSM4626769_TGCTACCTCTGGCGTG-1  | GSM4626769 | OA |
| GSM4626769_TGCTGCTAGGCTAGCA-1  | GSM4626769 | OA |
| GSM4626769_TGCTGCTCAGGATTGG-1  | GSM4626769 | OA |
| GSM4626769_TGCTGCTGTCTTCAAG-1  | GSM4626769 | OA |
| GSM4626769_TGCTGCTGTGCGCTTG-1  | GSM4626769 | OA |
| GSM4626769_TGCTGCTGTTCAGGCC-1  | GSM4626769 | OA |
| GSM4626769_TGCTGCTTCAGCATGT-1  | GSM4626769 | OA |
| GSM4626769_TGCTGCTTCTGGCGAC-1  | GSM4626769 | OA |
| GSM4626769_TGGACGCAGGAGTTGC-1  | GSM4626769 | OA |
| GSM4626769_TGGACGCAGTAGCGGT-1  | GSM4626769 | OA |
| GSM4626769_TGGACGCCAATGTAAG-1  | GSM4626769 | OA |
| GSM4626769_TGGACGCGTTCTCATT-1  | GSM4626769 | OA |
| GSM4626769_TGGACGCTCGAGAGCA-1  | GSM4626769 | OA |
| GSM4626769_TGGACGCTCGCGTTTC-1  | GSM4626769 | OA |
| GSM4626769_TGGACGCTCGTGACAT-1  | GSM4626769 | OA |
| GSM4626769_TGGCCAGAGTGCGATG-1  | GSM4626769 | OA |
| GSM4626769_TGGCCAGCATAGACTC-1  | GSM4626769 | OA |
| GSM4626769_TGGCGCAAGTACGTTC-1  | GSM4626769 | OA |
| GSM4626769_TGGCGCACATAAGACA-1  | GSM4626769 | OA |
| GSM4626769_TGGCGCACATCCAACA-1  | GSM4626769 | OA |
| GSM4626769_TGGCGCATCAGCTGGC-1  | GSM4626769 | OA |
| GSM4626769_TGGCGCATCATCGCTC-1  | GSM4626769 | OA |
| GSM4626769_TGGCGCATCTATGTGG-1  | GSM4626769 | OA |
| GSM4626769_TGGCTGGAGCGATATA-1  | GSM4626769 | OA |
| GSM4626769_TGGCTGGCACTTGGAT-1  | GSM4626769 | OA |
| GSM4626769_TGGGAAGCAATCCGAT-1  | GSM4626769 | OA |
| GSM4626769_TGGGAAGCATATGGTC-1  | GSM4626769 | OA |
| GSM4626769_TGGGAAGGTCATATGC-1  | GSM4626769 | OA |
| GSM4626769_TGGGAAGTCTAACTTC-1  | GSM4626769 | OA |
| GSM4626769_TGGGCGTAGCTGCGAA-1  | GSM4626769 | OA |
| GSM4626769_TGGGCGTAGTAGGCCA-1  | GSM4626769 | OA |
| GSM4626769_TGGGCGTAGTGGGCTA-1  | GSM4626769 | OA |
| GSM4626769_TGGGCGTCAAGACACG-1  | GSM4626769 | OA |
| GSM4626769_TGGGCGTTCGGAAACG-1  | GSM4626769 | OA |
| GSM4626769_TGGGCGTTCCTTAGCCC-1 | GSM4626769 | OA |
| GSM4626769_TGGTTAGAGATCCGAG-1  | GSM4626769 | OA |
| GSM4626769_TGGTTAGAGATGTGGC-1  | GSM4626769 | OA |
| GSM4626769_TGGTTAGAGCCAGTTT-1  | GSM4626769 | OA |
| GSM4626769_TGGTTAGAGTGAATTG-1  | GSM4626769 | OA |
| GSM4626769_TGGTTAGAGTGTTGAA-1  | GSM4626769 | OA |
| GSM4626769_TGGTTAGCACCTCGGA-1  | GSM4626769 | OA |
| GSM4626769_TGGTTAGCATGCAATC-1  | GSM4626769 | OA |
| GSM4626769_TGGTTCAGGAATGGA-1   | GSM4626769 | OA |
| GSM4626769_TGGTTCAGTACATGTC-1  | GSM4626769 | OA |
| GSM4626769_TGGTTCCTCATTTGGG-1  | GSM4626769 | OA |
| GSM4626769_TGGTTCCTCTCAAGTG-1  | GSM4626769 | OA |

|                                |            |    |
|--------------------------------|------------|----|
| GSM4626769_TGGTTCCTCTGCGTAA-1  | GSM4626769 | OA |
| GSM4626769_TGTATTCAGTATTGGA-1  | GSM4626769 | OA |
| GSM4626769_TGTATTCCAGGCTCAC-1  | GSM4626769 | OA |
| GSM4626769_TGTATTCCATCAGTCA-1  | GSM4626769 | OA |
| GSM4626769_TGTATTCCATCCGGGT-1  | GSM4626769 | OA |
| GSM4626769_TGTATTTCGTAAGCACG-1 | GSM4626769 | OA |
| GSM4626769_TGTATTTCGTCGTGGCT-1 | GSM4626769 | OA |
| GSM4626769_TGTATTCTCACAGGCC-1  | GSM4626769 | OA |
| GSM4626769_TGTCCCAAGTCCGGTC-1  | GSM4626769 | OA |
| GSM4626769_TGTCCACAATGGAAT-1   | GSM4626769 | OA |
| GSM4626769_TGTCCACAGCTTAAC-1   | GSM4626769 | OA |
| GSM4626769_TGTCCACAGGGATTG-1   | GSM4626769 | OA |
| GSM4626769_TGTCCAGTACCATCA-1   | GSM4626769 | OA |
| GSM4626769_TGTCCAGTGTAACGG-1   | GSM4626769 | OA |
| GSM4626769_TGTCCATCACATACG-1   | GSM4626769 | OA |
| GSM4626769_TGTCCATCTAGCACA-1   | GSM4626769 | OA |
| GSM4626769_TGTGGTAAGCTCAACT-1  | GSM4626769 | OA |
| GSM4626769_TGTGGTACAATCGGTT-1  | GSM4626769 | OA |
| GSM4626769_TGTGGTACACATGGGA-1  | GSM4626769 | OA |
| GSM4626769_TGTGGTACACCGAAAG-1  | GSM4626769 | OA |
| GSM4626769_TGTGGTAGTTAAGGGC-1  | GSM4626769 | OA |
| GSM4626769_TGTGGTATCACAGTAC-1  | GSM4626769 | OA |
| GSM4626769_TGTGGTATCATTGCC-1   | GSM4626769 | OA |
| GSM4626769_TGTGTTTCATCACAAAC-1 | GSM4626769 | OA |
| GSM4626769_TGTGTTTGTACCTAA-1   | GSM4626769 | OA |
| GSM4626769_TGTGTTTGTGCTCCT-1   | GSM4626769 | OA |
| GSM4626769_TGTGTTTTCTCATT-1    | GSM4626769 | OA |
| GSM4626769_TGTGTTTTCGGAAATA-1  | GSM4626769 | OA |
| GSM4626769_TGTTCCGGTAAACACA-1  | GSM4626769 | OA |
| GSM4626769_TGTTCCGGTAGCTGCC-1  | GSM4626769 | OA |
| GSM4626769_TGTTCCGGTGCGCTTG-1  | GSM4626769 | OA |
| GSM4626769_TGTTCCGTACAATGC-1   | GSM4626769 | OA |
| GSM4626769_TGTTCCGTCCAAGTA-1   | GSM4626769 | OA |
| GSM4626769_TGTTCCGTTCGCATGAT-1 | GSM4626769 | OA |
| GSM4626769_TGTTCCGTCTCACATT-1  | GSM4626769 | OA |
| GSM4626769_TGTTCCGTCTCCAACC-1  | GSM4626769 | OA |
| GSM4626769_TTAACTCCAGACAGGT-1  | GSM4626769 | OA |
| GSM4626769_TTAACTCGTCCGCTGA-1  | GSM4626769 | OA |
| GSM4626769_TTAACTCGTGGTCCGT-1  | GSM4626769 | OA |
| GSM4626769_TTAGGACAGACAATAC-1  | GSM4626769 | OA |
| GSM4626769_TTAGGACAGTAGCGGT-1  | GSM4626769 | OA |
| GSM4626769_TTAGGACCAGATCCAT-1  | GSM4626769 | OA |
| GSM4626769_TTAGGACTCCTCTAGC-1  | GSM4626769 | OA |
| GSM4626769_TTAGGACTCCTGCCAT-1  | GSM4626769 | OA |
| GSM4626769_TTAGGACTCGGCGCTA-1  | GSM4626769 | OA |
| GSM4626769_TTAGGCAAGCCGCCTA-1  | GSM4626769 | OA |
| GSM4626769_TTAGGCAAGTTCCACA-1  | GSM4626769 | OA |
| GSM4626769_TTAGGCAGTAAGGGAA-1  | GSM4626769 | OA |
| GSM4626769_TTAGGCAGTTTAAGCC-1  | GSM4626769 | OA |
| GSM4626769_TTAGGCATCCGCATCT-1  | GSM4626769 | OA |
| GSM4626769_TTAGTTCCAATGGAGC-1  | GSM4626769 | OA |
| GSM4626769_TTAGTTTCGTTACCAGT-1 | GSM4626769 | OA |
| GSM4626769_TTATGCTCAGACTCGC-1  | GSM4626769 | OA |
| GSM4626769_TTATGCTCAGTAAGAT-1  | GSM4626769 | OA |
| GSM4626769_TTATGCTGTACGAAAT-1  | GSM4626769 | OA |
| GSM4626769_TTATGCTTCCAACCAA-1  | GSM4626769 | OA |
| GSM4626769_TTATGCTTCGGACAAG-1  | GSM4626769 | OA |

|                                |            |    |
|--------------------------------|------------|----|
| GSM4626769_TTCCCAGCATCCTAGA-1  | GSM4626769 | OA |
| GSM4626769_TTCCCAGCATGTTCGAT-1 | GSM4626769 | OA |
| GSM4626769_TTCCCAGGTGATAAAC-1  | GSM4626769 | OA |
| GSM4626769_TTCCCAGGTGCACCAC-1  | GSM4626769 | OA |
| GSM4626769_TTCCCAGTCACTATTC-1  | GSM4626769 | OA |
| GSM4626769_TTCCCAGTCAGTTAGC-1  | GSM4626769 | OA |
| GSM4626769_TTCCCAGTCGGCGCAT-1  | GSM4626769 | OA |
| GSM4626769_TTCCCAGTCTACCAGA-1  | GSM4626769 | OA |
| GSM4626769_TTCCCAGTCTCTAGGA-1  | GSM4626769 | OA |
| GSM4626769_TTCCAAGAGCTGCCCA-1  | GSM4626769 | OA |
| GSM4626769_TTCCAAGAGCTTCGCG-1  | GSM4626769 | OA |
| GSM4626769_TTCCAAGCAATGGACG-1  | GSM4626769 | OA |
| GSM4626769_TTCCAAGCAGACGCTC-1  | GSM4626769 | OA |
| GSM4626769_TTCCAAGCAGATTGCT-1  | GSM4626769 | OA |
| GSM4626769_TTCGGTCTCACGGTTA-1  | GSM4626769 | OA |
| GSM4626769_TTCGGTCTCGGTCTAA-1  | GSM4626769 | OA |
| GSM4626769_TTCTACAAGAGCTGGT-1  | GSM4626769 | OA |
| GSM4626769_TTCTACAAGCAACGGT-1  | GSM4626769 | OA |
| GSM4626769_TTCTACAGTCGGCACT-1  | GSM4626769 | OA |
| GSM4626769_TTCTACATCAGCTCGG-1  | GSM4626769 | OA |
| GSM4626769_TTCTACATCTTCGAGA-1  | GSM4626769 | OA |
| GSM4626769_TTCTCAAAGCTGCAAG-1  | GSM4626769 | OA |
| GSM4626769_TTCTCAAAGTGGTCCC-1  | GSM4626769 | OA |
| GSM4626769_TTCTCAATCGCGTAGC-1  | GSM4626769 | OA |
| GSM4626769_TTCTCCTAGAGCTGGT-1  | GSM4626769 | OA |
| GSM4626769_TTCTCCTCACGGTGTC-1  | GSM4626769 | OA |
| GSM4626769_TTCTCCTCACGTGAGA-1  | GSM4626769 | OA |
| GSM4626769_TTCTCCTCAGCATACT-1  | GSM4626769 | OA |
| GSM4626769_TTCTCCTCAGGCAGTA-1  | GSM4626769 | OA |
| GSM4626769_TTCTCCTCAGTCGATT-1  | GSM4626769 | OA |
| GSM4626769_TTCTCCTCATCGGTTA-1  | GSM4626769 | OA |
| GSM4626769_TTCTCCTGTGTGACCC-1  | GSM4626769 | OA |
| GSM4626769_TTCTCCTGTTCCACGG-1  | GSM4626769 | OA |
| GSM4626769_TTCTCCTGTTGACGTT-1  | GSM4626769 | OA |
| GSM4626769_TTCTCCTTCATGCTCC-1  | GSM4626769 | OA |
| GSM4626769_TTCTCCTTCTGCTGCT-1  | GSM4626769 | OA |
| GSM4626769_TTCTTAGAGAAGCCCA-1  | GSM4626769 | OA |
| GSM4626769_TTCTTAGAGGCGATAC-1  | GSM4626769 | OA |
| GSM4626769_TTCTTAGAGTCGATAA-1  | GSM4626769 | OA |
| GSM4626769_TTCTTAGCAATCACAC-1  | GSM4626769 | OA |
| GSM4626769_TTCTTAGCAATCAGAA-1  | GSM4626769 | OA |
| GSM4626769_TTCTTAGCATGCAATC-1  | GSM4626769 | OA |
| GSM4626769_TTCTTAGGTATGAAAC-1  | GSM4626769 | OA |
| GSM4626769_TTCTTAGGTGCACTTA-1  | GSM4626769 | OA |
| GSM4626769_TTCTTAGGTGGTCTCG-1  | GSM4626769 | OA |
| GSM4626769_TTCTTAGGTGTTCTTT-1  | GSM4626769 | OA |
| GSM4626769_TTCTTAGTCACAGGCC-1  | GSM4626769 | OA |
| GSM4626769_TTGAACGAGGAACTGC-1  | GSM4626769 | OA |
| GSM4626769_TTGAACGCAACAACCT-1  | GSM4626769 | OA |
| GSM4626769_TTGAACGGTTAAGGGC-1  | GSM4626769 | OA |
| GSM4626769_TTGAACGGTTGTCTTT-1  | GSM4626769 | OA |
| GSM4626769_TTGACTTAGGCTAGGT-1  | GSM4626769 | OA |
| GSM4626769_TTGACTTCAAGAGGCT-1  | GSM4626769 | OA |
| GSM4626769_TTGACTTCACATAACC-1  | GSM4626769 | OA |
| GSM4626769_TTGACTTCAGGGAGAG-1  | GSM4626769 | OA |
| GSM4626769_TTGACTTGTCGGGTCT-1  | GSM4626769 | OA |
| GSM4626769_TTGACTTGTGGCCCTA-1  | GSM4626769 | OA |

|                                  |            |    |
|----------------------------------|------------|----|
| GSM4626769_TTGACTTGTGGTTTCA-1    | GSM4626769 | OA |
| GSM4626769_TTGACTTGTCTGAAC-1     | GSM4626769 | OA |
| GSM4626769_TTGCCGTTCCGTCGTT-1    | GSM4626769 | OA |
| GSM4626769_TTGCGTCAGCTTTGGT-1    | GSM4626769 | OA |
| GSM4626769_TTGCGTCCACAGGTTT-1    | GSM4626769 | OA |
| GSM4626769_TTGCGTCCATATACGC-1    | GSM4626769 | OA |
| GSM4626769_TTGCGTTCGTAGCCTCG-1   | GSM4626769 | OA |
| GSM4626769_TTGGAACAGCGATGAC-1    | GSM4626769 | OA |
| GSM4626769_TTGGAACGTACTIONTCTT-1 | GSM4626769 | OA |
| GSM4626769_TTGGAACGTCGAGTTT-1    | GSM4626769 | OA |
| GSM4626769_TTGGAACGTGCTGTAT-1    | GSM4626769 | OA |
| GSM4626769_TTGGAACCTCTTGGTC-1    | GSM4626769 | OA |
| GSM4626769_TTGGAACCTCGCATGAT-1   | GSM4626769 | OA |
| GSM4626769_TTGGAACCTCTGACCTC-1   | GSM4626769 | OA |
| GSM4626769_TTGGAACCTTTAGAGC-1    | GSM4626769 | OA |
| GSM4626769_TTGGAACAAGCCGGTAA-1   | GSM4626769 | OA |
| GSM4626769_TTGGAACAATAACGA-1     | GSM4626769 | OA |
| GSM4626769_TTGGAACACGAGGTA-1     | GSM4626769 | OA |
| GSM4626769_TTGGAAGTAAGAGGA-1     | GSM4626769 | OA |
| GSM4626769_TTGGAAGTACAGTGG-1     | GSM4626769 | OA |
| GSM4626769_TTGGAAGTATGGTTC-1     | GSM4626769 | OA |
| GSM4626769_TTGGAAGTCATATGC-1     | GSM4626769 | OA |
| GSM4626769_TTGGAAGTTCCCTTG-1     | GSM4626769 | OA |
| GSM4626769_TTGTAGGAGACCACGA-1    | GSM4626769 | OA |
| GSM4626769_TTGTAGGAGTTAACGA-1    | GSM4626769 | OA |
| GSM4626769_TTGTAGGCACCGAAAG-1    | GSM4626769 | OA |
| GSM4626769_TTGTAGGCATCCTTGC-1    | GSM4626769 | OA |
| GSM4626769_TTGTAGGGTCAATGTC-1    | GSM4626769 | OA |
| GSM4626769_TTGTAGGGTTCGCGGTT-1   | GSM4626769 | OA |
| GSM4626769_TTGTAGGTCACATACG-1    | GSM4626769 | OA |
| GSM4626769_TTTACTGCAAAGTCTG-1    | GSM4626769 | OA |
| GSM4626769_TTTACTGCAAGTTCTG-1    | GSM4626769 | OA |
| GSM4626769_TTTACTGCAGGGAGAG-1    | GSM4626769 | OA |
| GSM4626769_TTTACTGGTGGTCCGT-1    | GSM4626769 | OA |
| GSM4626769_TTTACTGGTTAAGAAC-1    | GSM4626769 | OA |
| GSM4626769_TTTACTGTCCAAGTAC-1    | GSM4626769 | OA |
| GSM4626769_TTTACTGTCCCTGACT-1    | GSM4626769 | OA |
| GSM4626769_TTTATGCAGCCGGTAA-1    | GSM4626769 | OA |
| GSM4626769_TTTATGCAGCGAGAAA-1    | GSM4626769 | OA |
| GSM4626769_TTTATGCAGGGCATGT-1    | GSM4626769 | OA |
| GSM4626769_TTTATGCCAACTGCGC-1    | GSM4626769 | OA |
| GSM4626769_TTTATGCCACGCGAAA-1    | GSM4626769 | OA |
| GSM4626769_TTTATGCCATGTCTCC-1    | GSM4626769 | OA |
| GSM4626769_TTTATGCGTGAAAGAG-1    | GSM4626769 | OA |
| GSM4626769_TTTATGCTCGCAAGCC-1    | GSM4626769 | OA |
| GSM4626769_TTTATGCTCTTGCCGT-1    | GSM4626769 | OA |
| GSM4626769_TTTCTCAGAGGTAGA-1     | GSM4626769 | OA |
| GSM4626769_TTTCTCCAGTTCCCT-1     | GSM4626769 | OA |
| GSM4626769_TTTCTCGTTTTGCTC-1     | GSM4626769 | OA |
| GSM4626769_TTTCTCTCAGCTGGC-1     | GSM4626769 | OA |
| GSM4626769_TTTCTCTCCAGGGCT-1     | GSM4626769 | OA |
| GSM4626769_TTTGCGCAGCTGCGAA-1    | GSM4626769 | OA |
| GSM4626769_TTTGCGCAGTCATCCA-1    | GSM4626769 | OA |
| GSM4626769_TTTGCGCCAGGTACA-1     | GSM4626769 | OA |
| GSM4626769_TTTGCGCTCAGATAAG-1    | GSM4626769 | OA |
| GSM4626769_TTTGCGCTCTTGGGTA-1    | GSM4626769 | OA |
| GSM4626769_TTTGGTTAGAGGACGG-1    | GSM4626769 | OA |

|                                |            |    |
|--------------------------------|------------|----|
| GSM4626769_TTTGGTTAGTACGATA-1  | GSM4626769 | OA |
| GSM4626769_TTTGGTTGTCACCCAG-1  | GSM4626769 | OA |
| GSM4626769_TTTGGTTTCCTCAACC-1  | GSM4626769 | OA |
| GSM4626769_TTTGTCAAGAATCTCC-1  | GSM4626769 | OA |
| GSM4626769_TTTGTCAAGTACATGA-1  | GSM4626769 | OA |
| GSM4626769_TTTGTCACAATAGCGG-1  | GSM4626769 | OA |
| GSM4626769_TTTGTCAGTACCGAGA-1  | GSM4626769 | OA |
| GSM4626769_TTTGTCAGTAGCACGA-1  | GSM4626769 | OA |
| GSM4626769_TTTGTCAGTGCAGACA-1  | GSM4626769 | OA |
| GSM4626769_TTTGTCATCTGATACG-1  | GSM4626769 | OA |
| GSM4626769_TTTGTCATCTTCATGT-1  | GSM4626769 | OA |
| GSM4626770_AAACCTGAGATGAGAG-1  | GSM4626770 | OA |
| GSM4626770_AAACCTGAGTGA CTCT-1 | GSM4626770 | OA |
| GSM4626770_AAACCTGCAAGGTGTG-1  | GSM4626770 | OA |
| GSM4626770_AAACCTGCAGCGTCCA-1  | GSM4626770 | OA |
| GSM4626770_AAACCTGCAGCTGCTG-1  | GSM4626770 | OA |
| GSM4626770_AAACCTGTCCAGATCA-1  | GSM4626770 | OA |
| GSM4626770_AAACCTGTCTGGTGTA-1  | GSM4626770 | OA |
| GSM4626770_AAACGGGCAAACGTGG-1  | GSM4626770 | OA |
| GSM4626770_AAACGGGCACGAAATA-1  | GSM4626770 | OA |
| GSM4626770_AAACGGGCAGGTTTCA-1  | GSM4626770 | OA |
| GSM4626770_AAACGGGGTCACCTAA-1  | GSM4626770 | OA |
| GSM4626770_AAACGGGGTGTGACCC-1  | GSM4626770 | OA |
| GSM4626770_AAACGGGTCCTTTCTC-1  | GSM4626770 | OA |
| GSM4626770_AAACGGGT CGAATCCA-1 | GSM4626770 | OA |
| GSM4626770_AAACGGGT CGCACTCT-1 | GSM4626770 | OA |
| GSM4626770_AAACGGGT CGTTTAGG-1 | GSM4626770 | OA |
| GSM4626770_AAAGATGAGCTAGGCA-1  | GSM4626770 | OA |
| GSM4626770_AAAGATGAGTTACCCA-1  | GSM4626770 | OA |
| GSM4626770_AAAGATGCAGGGATTG-1  | GSM4626770 | OA |
| GSM4626770_AAAGATGGTATGGTTC-1  | GSM4626770 | OA |
| GSM4626770_AAAGATGTCACAGGCC-1  | GSM4626770 | OA |
| GSM4626770_AAAGATGTCCGAATGT-1  | GSM4626770 | OA |
| GSM4626770_AAAGCAAAGAGCTGCA-1  | GSM4626770 | OA |
| GSM4626770_AAAGCAAAGATGGCGT-1  | GSM4626770 | OA |
| GSM4626770_AAAGCAAAGCATGGCA-1  | GSM4626770 | OA |
| GSM4626770_AAAGCAAAGTCCGAAGA-1 | GSM4626770 | OA |
| GSM4626770_AAAGTAGAGATGTGGC-1  | GSM4626770 | OA |
| GSM4626770_AAAGTAGAGCTAGTGG-1  | GSM4626770 | OA |
| GSM4626770_AAAGTAGAGTT CGCAT-1 | GSM4626770 | OA |
| GSM4626770_AAAGTAGGTTGGAGGT-1  | GSM4626770 | OA |
| GSM4626770_AAAGTAGTCTAACTTC-1  | GSM4626770 | OA |
| GSM4626770_AAATGCCAGAGTTGGC-1  | GSM4626770 | OA |
| GSM4626770_AAATGCCAGATATGGT-1  | GSM4626770 | OA |
| GSM4626770_AAATGCCACCGAATT-1   | GSM4626770 | OA |
| GSM4626770_AAATGCCAGATGGGT-1   | GSM4626770 | OA |
| GSM4626770_AAATGCCCATGAGCGA-1  | GSM4626770 | OA |
| GSM4626770_AACACGTAGCCCTAAT-1  | GSM4626770 | OA |
| GSM4626770_AACACGTAGCTATGCT-1  | GSM4626770 | OA |
| GSM4626770_AACACGTTCATGCAAC-1  | GSM4626770 | OA |
| GSM4626770_AACACGTTCATGCTCC-1  | GSM4626770 | OA |
| GSM4626770_AACACGTTCATGTAGC-1  | GSM4626770 | OA |
| GSM4626770_AACCATGAGA ACTCGG-1 | GSM4626770 | OA |
| GSM4626770_AACCATGCATGTCCTC-1  | GSM4626770 | OA |
| GSM4626770_AACCATGGTCAGTGGGA-1 | GSM4626770 | OA |
| GSM4626770_AACCATGGTCGAAAGC-1  | GSM4626770 | OA |
| GSM4626770_AACCATGGTGCGGAAT-1  | GSM4626770 | OA |





|                                |            |    |
|--------------------------------|------------|----|
| GSM4626770_AACTTTCTCCCAGGTG-1  | GSM4626770 | OA |
| GSM4626770_AACTTTCTCGCCAAAT-1  | GSM4626770 | OA |
| GSM4626770_AACTTTCTCTGATACG-1  | GSM4626770 | OA |
| GSM4626770_AAGACCTAGGTGCTAG-1  | GSM4626770 | OA |
| GSM4626770_AAGACCTACTAAGTC-1   | GSM4626770 | OA |
| GSM4626770_AAGACCTACTTAACG-1   | GSM4626770 | OA |
| GSM4626770_AAGACCTCATACCATG-1  | GSM4626770 | OA |
| GSM4626770_AAGACCTGTAAGTGCC-1  | GSM4626770 | OA |
| GSM4626770_AAGACCTGTCTCATCC-1  | GSM4626770 | OA |
| GSM4626770_AAGCCGCAGTTGCAGG-1  | GSM4626770 | OA |
| GSM4626770_AAGCCGCCACAGTCGC-1  | GSM4626770 | OA |
| GSM4626770_AAGCCGCGTAAGTGCC-1  | GSM4626770 | OA |
| GSM4626770_AAGCCGCGTAGGACAC-1  | GSM4626770 | OA |
| GSM4626770_AAGCCGCGTCGCTTTC-1  | GSM4626770 | OA |
| GSM4626770_AAGCCGCGTGTGACCC-1  | GSM4626770 | OA |
| GSM4626770_AAGCCGCGTTTAAGCC-1  | GSM4626770 | OA |
| GSM4626770_AAGGAGCAGGATATAC-1  | GSM4626770 | OA |
| GSM4626770_AAGGAGCAGGGATGGG-1  | GSM4626770 | OA |
| GSM4626770_AAGGAGCCATTGAGCT-1  | GSM4626770 | OA |
| GSM4626770_AAGGAGCTCACGGTTA-1  | GSM4626770 | OA |
| GSM4626770_AAGGCAGAGAAAGTGG-1  | GSM4626770 | OA |
| GSM4626770_AAGGCAGAGCGTTCCG-1  | GSM4626770 | OA |
| GSM4626770_AAGGCAGAGGTGATTA-1  | GSM4626770 | OA |
| GSM4626770_AAGGCAGAGTTGTCGT-1  | GSM4626770 | OA |
| GSM4626770_AAGGCAGCAGCTCGAC-1  | GSM4626770 | OA |
| GSM4626770_AAGGCAGCAGGTCCAC-1  | GSM4626770 | OA |
| GSM4626770_AAGGCAGGTCACCTAA-1  | GSM4626770 | OA |
| GSM4626770_AAGGCAGGTCTCTCTG-1  | GSM4626770 | OA |
| GSM4626770_AAGGCAGTCCAAGTAC-1  | GSM4626770 | OA |
| GSM4626770_AAGGTTTCAGAAGGCCT-1 | GSM4626770 | OA |
| GSM4626770_AAGGTTTCAGGCAGTCA-1 | GSM4626770 | OA |
| GSM4626770_AAGGTTCTGATCACCA-1  | GSM4626770 | OA |
| GSM4626770_AAGGTTCTCCATGCTC-1  | GSM4626770 | OA |
| GSM4626770_AAGGTTCTCCGAACGC-1  | GSM4626770 | OA |
| GSM4626770_AAGGTTCTCTCGAGTA-1  | GSM4626770 | OA |
| GSM4626770_AAGTCTGAGCATCATC-1  | GSM4626770 | OA |
| GSM4626770_AAGTCTGAGCTAAACA-1  | GSM4626770 | OA |
| GSM4626770_AAGTCTGAGCTGTCTA-1  | GSM4626770 | OA |
| GSM4626770_AAGTCTGCAAGTCATC-1  | GSM4626770 | OA |
| GSM4626770_AAGTCTGCACATTTCT-1  | GSM4626770 | OA |
| GSM4626770_AAGTCTGCATCCTTGC-1  | GSM4626770 | OA |
| GSM4626770_AAGTCTGGTTCGAATCT-1 | GSM4626770 | OA |
| GSM4626770_AAGTCTGGTGATAAGT-1  | GSM4626770 | OA |
| GSM4626770_AAGTCTGGTTCGGCA-1   | GSM4626770 | OA |
| GSM4626770_AAGTCTGTCCAAGTAC-1  | GSM4626770 | OA |
| GSM4626770_AAGTCTGTCCTTCAAT-1  | GSM4626770 | OA |
| GSM4626770_AAGTCTGTGCGCAAAT-1  | GSM4626770 | OA |
| GSM4626770_AATCCAGAGCTGAACG-1  | GSM4626770 | OA |
| GSM4626770_AATCCAGAGGAATTAC-1  | GSM4626770 | OA |
| GSM4626770_AATCCAGAGTCGTAAT-1  | GSM4626770 | OA |
| GSM4626770_AATCCAGCAAGCCCAC-1  | GSM4626770 | OA |
| GSM4626770_AATCCAGCAGCTGTTA-1  | GSM4626770 | OA |
| GSM4626770_AATCCAGCAGGTTTCA-1  | GSM4626770 | OA |
| GSM4626770_AATCCAGGTTCCAGGC-1  | GSM4626770 | OA |
| GSM4626770_AATCCAGTCAGGCGAA-1  | GSM4626770 | OA |
| GSM4626770_AATCCAGTCGCCAGCA-1  | GSM4626770 | OA |
| GSM4626770_AATCCAGTCTGGCCA-1   | GSM4626770 | OA |

|                                |            |    |
|--------------------------------|------------|----|
| GSM4626770_AATCGGTAGAGACTTA-1  | GSM4626770 | OA |
| GSM4626770_AATCGGTCACACTGCG-1  | GSM4626770 | OA |
| GSM4626770_AATCGGTCATCCCATC-1  | GSM4626770 | OA |
| GSM4626770_AATCGGTTCCGGATGGA-1 | GSM4626770 | OA |
| GSM4626770_AATCGGTTCTCACATT-1  | GSM4626770 | OA |
| GSM4626770_ACACCAAAGCTGTTCA-1  | GSM4626770 | OA |
| GSM4626770_ACACCAACAAACTGTC-1  | GSM4626770 | OA |
| GSM4626770_ACACCAACAGTTAACC-1  | GSM4626770 | OA |
| GSM4626770_ACACCAACATACCATG-1  | GSM4626770 | OA |
| GSM4626770_ACACCAACATGGTCAT-1  | GSM4626770 | OA |
| GSM4626770_ACACCAAGTCAATACC-1  | GSM4626770 | OA |
| GSM4626770_ACACCAATCACAGGCC-1  | GSM4626770 | OA |
| GSM4626770_ACACCAATCCTTAATC-1  | GSM4626770 | OA |
| GSM4626770_ACACCCTAGTGGTAAT-1  | GSM4626770 | OA |
| GSM4626770_ACACCCTCACATTAGC-1  | GSM4626770 | OA |
| GSM4626770_ACACCCTCACTACAGT-1  | GSM4626770 | OA |
| GSM4626770_ACACCCTTCAGGTAAA-1  | GSM4626770 | OA |
| GSM4626770_ACACCCTTCTACTATC-1  | GSM4626770 | OA |
| GSM4626770_ACACCGGAGCCCGAAA-1  | GSM4626770 | OA |
| GSM4626770_ACACCGGCAAGAAAGG-1  | GSM4626770 | OA |
| GSM4626770_ACACCGGCACCAGTTA-1  | GSM4626770 | OA |
| GSM4626770_ACACCGGCAGCGTAAG-1  | GSM4626770 | OA |
| GSM4626770_ACACCGGGTCAGATAA-1  | GSM4626770 | OA |
| GSM4626770_ACACCGGGTCGTTCT-1   | GSM4626770 | OA |
| GSM4626770_ACACCGGGTCTGATCA-1  | GSM4626770 | OA |
| GSM4626770_ACACCGGGTTGTGGAG-1  | GSM4626770 | OA |
| GSM4626770_ACACCGGTCAGTACGT-1  | GSM4626770 | OA |
| GSM4626770_ACACCGGTCCCTGACT-1  | GSM4626770 | OA |
| GSM4626770_ACACTGAAGATCGATA-1  | GSM4626770 | OA |
| GSM4626770_ACACTGAAGCCACGTC-1  | GSM4626770 | OA |
| GSM4626770_ACACTGACACGGTTTA-1  | GSM4626770 | OA |
| GSM4626770_ACACTGACACTGTCGG-1  | GSM4626770 | OA |
| GSM4626770_ACACTGACAGACGCCT-1  | GSM4626770 | OA |
| GSM4626770_ACACTGAGTCCGTTAA-1  | GSM4626770 | OA |
| GSM4626770_ACACTGAGTGCACCAC-1  | GSM4626770 | OA |
| GSM4626770_ACAGCCGAGCACCGCT-1  | GSM4626770 | OA |
| GSM4626770_ACAGCCGAGTGTTTGC-1  | GSM4626770 | OA |
| GSM4626770_ACAGCCGCACAGATTC-1  | GSM4626770 | OA |
| GSM4626770_ACAGCCGCACCTCGTT-1  | GSM4626770 | OA |
| GSM4626770_ACAGCCGGTTCGAATC-1  | GSM4626770 | OA |
| GSM4626770_ACAGCCGTCCCAAGTA-1  | GSM4626770 | OA |
| GSM4626770_ACAGCTACACGGTAGA-1  | GSM4626770 | OA |
| GSM4626770_ACAGCTACATACAGCT-1  | GSM4626770 | OA |
| GSM4626770_ACAGCTATCATCGGAT-1  | GSM4626770 | OA |
| GSM4626770_ACAGCTATCTGTTTGT-1  | GSM4626770 | OA |
| GSM4626770_ACATACGCATTATCTC-1  | GSM4626770 | OA |
| GSM4626770_ACATACGGTATCGCAT-1  | GSM4626770 | OA |
| GSM4626770_ACATACGGTTCAGACT-1  | GSM4626770 | OA |
| GSM4626770_ACATACGGTTCCTCCA-1  | GSM4626770 | OA |
| GSM4626770_ACATACGTCAGTACGT-1  | GSM4626770 | OA |
| GSM4626770_ACATCAGGTAAGTGGC-1  | GSM4626770 | OA |
| GSM4626770_ACATCAGGTAGCGTGA-1  | GSM4626770 | OA |
| GSM4626770_ACATCAGTCAAACCAC-1  | GSM4626770 | OA |
| GSM4626770_ACATCAGTCAGTTGAC-1  | GSM4626770 | OA |
| GSM4626770_ACATGGTAGCCCAGCT-1  | GSM4626770 | OA |
| GSM4626770_ACATGGTAGGGAACGG-1  | GSM4626770 | OA |
| GSM4626770_ACATGGTCAAAGTGCG-1  | GSM4626770 | OA |

|                                |            |    |
|--------------------------------|------------|----|
| GSM4626770_ACATGGTCACAGGAGT-1  | GSM4626770 | OA |
| GSM4626770_ACATGGTCATTATCTC-1  | GSM4626770 | OA |
| GSM4626770_ACCAGTAAGAAGAAGC-1  | GSM4626770 | OA |
| GSM4626770_ACCAGTAAGTACTTGC-1  | GSM4626770 | OA |
| GSM4626770_ACCAGTACACCAACCG-1  | GSM4626770 | OA |
| GSM4626770_ACCAGTACACGCCAGT-1  | GSM4626770 | OA |
| GSM4626770_ACCAGTACAGCTCGCA-1  | GSM4626770 | OA |
| GSM4626770_ACCAGTATCACTATTC-1  | GSM4626770 | OA |
| GSM4626770_ACCAGTATCGGAGCAA-1  | GSM4626770 | OA |
| GSM4626770_ACCAGTATCGTGACAT-1  | GSM4626770 | OA |
| GSM4626770_ACCAGTATCTGCAGTA-1  | GSM4626770 | OA |
| GSM4626770_ACCCACTAGGCTATCT-1  | GSM4626770 | OA |
| GSM4626770_ACCCACTCAACTGCGC-1  | GSM4626770 | OA |
| GSM4626770_ACCCACTGTAGGCATG-1  | GSM4626770 | OA |
| GSM4626770_ACCCACTGTTCTCATT-1  | GSM4626770 | OA |
| GSM4626770_ACCCACTTCCTTAATC-1  | GSM4626770 | OA |
| GSM4626770_ACCCACTTCTTGCAAG-1  | GSM4626770 | OA |
| GSM4626770_ACCGTAAAGAGACTTA-1  | GSM4626770 | OA |
| GSM4626770_ACCGTAAAGGCTCAGA-1  | GSM4626770 | OA |
| GSM4626770_ACCGTAAACACGGCTAC-1 | GSM4626770 | OA |
| GSM4626770_ACCGTAAACAGACTCGC-1 | GSM4626770 | OA |
| GSM4626770_ACCGTAAACAGGTCTCG-1 | GSM4626770 | OA |
| GSM4626770_ACCGTAAACATGCTGGC-1 | GSM4626770 | OA |
| GSM4626770_ACCGTAAATCTCGATGA-1 | GSM4626770 | OA |
| GSM4626770_ACCTTTAAGTGCGATG-1  | GSM4626770 | OA |
| GSM4626770_ACCTTTAGTAAAGGAG-1  | GSM4626770 | OA |
| GSM4626770_ACCTTTAGTTCGGTCT-1  | GSM4626770 | OA |
| GSM4626770_ACCTTTATCAGAGGTG-1  | GSM4626770 | OA |
| GSM4626770_ACCTTTATCGCCGTGA-1  | GSM4626770 | OA |
| GSM4626770_ACGAGCCAGAGACTTA-1  | GSM4626770 | OA |
| GSM4626770_ACGAGCCCAAGTTTC-1   | GSM4626770 | OA |
| GSM4626770_ACGAGCCCAATCGAAA-1  | GSM4626770 | OA |
| GSM4626770_ACGAGCCCAGGCTGAA-1  | GSM4626770 | OA |
| GSM4626770_ACGAGCCGTAGTGAAT-1  | GSM4626770 | OA |
| GSM4626770_ACGAGCCGTATCGCAT-1  | GSM4626770 | OA |
| GSM4626770_ACGAGCCGTCTCTCGT-1  | GSM4626770 | OA |
| GSM4626770_ACGAGCCGTTTGACAC-1  | GSM4626770 | OA |
| GSM4626770_ACGAGCCTCAGTGTTG-1  | GSM4626770 | OA |
| GSM4626770_ACGAGGAAGCCGCCTA-1  | GSM4626770 | OA |
| GSM4626770_ACGAGGAAGTACGTTC-1  | GSM4626770 | OA |
| GSM4626770_ACGAGGACAAATTGCC-1  | GSM4626770 | OA |
| GSM4626770_ACGAGGACAGCATACT-1  | GSM4626770 | OA |
| GSM4626770_ACGAGGATCCTTGCCA-1  | GSM4626770 | OA |
| GSM4626770_ACGAGGATCTCCGGTT-1  | GSM4626770 | OA |
| GSM4626770_ACGAGGATCTGCTGCT-1  | GSM4626770 | OA |
| GSM4626770_ACGATACTCGAACTGT-1  | GSM4626770 | OA |
| GSM4626770_ACGATGTAGTGTTTGC-1  | GSM4626770 | OA |
| GSM4626770_ACGATGTCAATAAGCA-1  | GSM4626770 | OA |
| GSM4626770_ACGATGTGATCGGA-1    | GSM4626770 | OA |
| GSM4626770_ACGATGTGTACCGGCT-1  | GSM4626770 | OA |
| GSM4626770_ACGATGTTCCAGGGCT-1  | GSM4626770 | OA |
| GSM4626770_ACGCAGCAGGAGTAGA-1  | GSM4626770 | OA |
| GSM4626770_ACGCAGCCACCGGAAA-1  | GSM4626770 | OA |
| GSM4626770_ACGCAGCCAGCGTCCA-1  | GSM4626770 | OA |
| GSM4626770_ACGCAGCCAGTTTACG-1  | GSM4626770 | OA |
| GSM4626770_ACGCAGCCATGTAAGA-1  | GSM4626770 | OA |
| GSM4626770_ACGCAGCCATTTCAGG-1  | GSM4626770 | OA |

|                                 |            |    |
|---------------------------------|------------|----|
| GSM4626770_ACGCAGCGTTCAACCA-1   | GSM4626770 | OA |
| GSM4626770_ACGCAGCTCACAAACC-1   | GSM4626770 | OA |
| GSM4626770_ACGCAGCTCCAAACTG-1   | GSM4626770 | OA |
| GSM4626770_ACGCAGCTCCAACCA-1    | GSM4626770 | OA |
| GSM4626770_ACGCCAGAGGCTCATT-1   | GSM4626770 | OA |
| GSM4626770_ACGCCAGGTAAACCTC-1   | GSM4626770 | OA |
| GSM4626770_ACGCCAGGTACATGTC-1   | GSM4626770 | OA |
| GSM4626770_ACGCCGACACGTCAGC-1   | GSM4626770 | OA |
| GSM4626770_ACGCCGACAGCGATCC-1   | GSM4626770 | OA |
| GSM4626770_ACGCCGAGTGTGCGTC-1   | GSM4626770 | OA |
| GSM4626770_ACGCCGATCACTATTC-1   | GSM4626770 | OA |
| GSM4626770_ACGCCGATCCGAACGC-1   | GSM4626770 | OA |
| GSM4626770_ACGCCGATCGGCATCG-1   | GSM4626770 | OA |
| GSM4626770_ACGGAGAAGATCTGAA-1   | GSM4626770 | OA |
| GSM4626770_ACGGAGAAGCAACGGT-1   | GSM4626770 | OA |
| GSM4626770_ACGGAGACACGAAATA-1   | GSM4626770 | OA |
| GSM4626770_ACGGAGACACTTCGAA-1   | GSM4626770 | OA |
| GSM4626770_ACGGAGACAGCGTTTCG-1  | GSM4626770 | OA |
| GSM4626770_ACGGAGACAGTGGAGT-1   | GSM4626770 | OA |
| GSM4626770_ACGGAGAGTCCGAATT-1   | GSM4626770 | OA |
| GSM4626770_ACGGAGAGTTGTGCGCG-1  | GSM4626770 | OA |
| GSM4626770_ACGGAGATCATGTAGC-1   | GSM4626770 | OA |
| GSM4626770_ACGGCCACAACACTGCTA-1 | GSM4626770 | OA |
| GSM4626770_ACGGCCACACACTGCG-1   | GSM4626770 | OA |
| GSM4626770_ACGGCCACAGGTGGAT-1   | GSM4626770 | OA |
| GSM4626770_ACGGCCAGTGGGTATG-1   | GSM4626770 | OA |
| GSM4626770_ACGGCCATCCTGTACC-1   | GSM4626770 | OA |
| GSM4626770_ACGGGCTAGAATGTTG-1   | GSM4626770 | OA |
| GSM4626770_ACGGGCTAGATGCCAG-1   | GSM4626770 | OA |
| GSM4626770_ACGGGCTCAAAGGTGC-1   | GSM4626770 | OA |
| GSM4626770_ACGGGCTGTAAATACG-1   | GSM4626770 | OA |
| GSM4626770_ACGGGCTTCCCGGATG-1   | GSM4626770 | OA |
| GSM4626770_ACGGGTCCAGATCCAT-1   | GSM4626770 | OA |
| GSM4626770_ACGGGTCCAGTAAGAT-1   | GSM4626770 | OA |
| GSM4626770_ACGGGTCCATGACATC-1   | GSM4626770 | OA |
| GSM4626770_ACGGGTCGTCCCGACA-1   | GSM4626770 | OA |
| GSM4626770_ACGGGTCTCCGTCAA-1    | GSM4626770 | OA |
| GSM4626770_ACGTCAAAGCCAGTAG-1   | GSM4626770 | OA |
| GSM4626770_ACGTCAATCGGCTACG-1   | GSM4626770 | OA |
| GSM4626770_ACTATCTAGAGAACAG-1   | GSM4626770 | OA |
| GSM4626770_ACTATCTAGGGATCTG-1   | GSM4626770 | OA |
| GSM4626770_ACTATCTCAATAGAGT-1   | GSM4626770 | OA |
| GSM4626770_ACTATCTCAGTGAGTG-1   | GSM4626770 | OA |
| GSM4626770_ACTATCTGTAGAGGAA-1   | GSM4626770 | OA |
| GSM4626770_ACTATCTGTCACCTAA-1   | GSM4626770 | OA |
| GSM4626770_ACTATCTGTGCGATAG-1   | GSM4626770 | OA |
| GSM4626770_ACTGAACAGCGATTCT-1   | GSM4626770 | OA |
| GSM4626770_ACTGAACAGGGCACTA-1   | GSM4626770 | OA |
| GSM4626770_ACTGAACCAAATCCGT-1   | GSM4626770 | OA |
| GSM4626770_ACTGAACACAGAGGT-1    | GSM4626770 | OA |
| GSM4626770_ACTGAACAGTTCATG-1    | GSM4626770 | OA |
| GSM4626770_ACTGAACCATCGTCGG-1   | GSM4626770 | OA |
| GSM4626770_ACTGAACGTACCGTAT-1   | GSM4626770 | OA |
| GSM4626770_ACTGAACGTTTCGTGAT-1  | GSM4626770 | OA |
| GSM4626770_ACTGAGTAGACCTTTG-1   | GSM4626770 | OA |
| GSM4626770_ACTGAGTACCCGAAA-1    | GSM4626770 | OA |
| GSM4626770_ACTGAGTGTGAGAGGT-1   | GSM4626770 | OA |

|                                |            |    |
|--------------------------------|------------|----|
| GSM4626770_ACTGATGAGCACGCCT-1  | GSM4626770 | OA |
| GSM4626770_ACTGATGCAAAGCAAT-1  | GSM4626770 | OA |
| GSM4626770_ACTGATGCATCCTAGA-1  | GSM4626770 | OA |
| GSM4626770_ACTGATGGTCGCCATG-1  | GSM4626770 | OA |
| GSM4626770_ACTGATGGTCTCCACT-1  | GSM4626770 | OA |
| GSM4626770_ACTGATGTCCAGATCA-1  | GSM4626770 | OA |
| GSM4626770_ACTGATGTCTCGTTTA-1  | GSM4626770 | OA |
| GSM4626770_ACTGCTCAGAGAGCTC-1  | GSM4626770 | OA |
| GSM4626770_ACTGCTCAGAGTAAGG-1  | GSM4626770 | OA |
| GSM4626770_ACTGCTCAGCACACAG-1  | GSM4626770 | OA |
| GSM4626770_ACTGCTCCAACACCTA-1  | GSM4626770 | OA |
| GSM4626770_ACTGCTCGTGGCAAAC-1  | GSM4626770 | OA |
| GSM4626770_ACTGCTCTCCACGAAT-1  | GSM4626770 | OA |
| GSM4626770_ACTGTCCAGGTCATCT-1  | GSM4626770 | OA |
| GSM4626770_ACTGTCCAGGTGCTTT-1  | GSM4626770 | OA |
| GSM4626770_ACTGTCCAGTTGTCGT-1  | GSM4626770 | OA |
| GSM4626770_ACTGTCCGTCATCGGC-1  | GSM4626770 | OA |
| GSM4626770_ACTGTCCGTCTTCAAG-1  | GSM4626770 | OA |
| GSM4626770_ACTGTCCCTCGGAGCAA-1 | GSM4626770 | OA |
| GSM4626770_ACTGTCCCTCGTACCGG-1 | GSM4626770 | OA |
| GSM4626770_ACTTACTAGTTAGCGG-1  | GSM4626770 | OA |
| GSM4626770_ACTTACTGTCTCCATC-1  | GSM4626770 | OA |
| GSM4626770_ACTTACTGTGTGACGA-1  | GSM4626770 | OA |
| GSM4626770_ACTTACTTCCAGTATG-1  | GSM4626770 | OA |
| GSM4626770_ACTTACTTCGCCTGAG-1  | GSM4626770 | OA |
| GSM4626770_ACTTGTTAGAGGTTAT-1  | GSM4626770 | OA |
| GSM4626770_ACTTGTTCAAGCGCTC-1  | GSM4626770 | OA |
| GSM4626770_ACTTGTTCAAGGTTTC-1  | GSM4626770 | OA |
| GSM4626770_ACTTGTTCACACTGCG-1  | GSM4626770 | OA |
| GSM4626770_ACTTGTTCACTGTTAG-1  | GSM4626770 | OA |
| GSM4626770_ACTTGTTTCCAGGGCT-1  | GSM4626770 | OA |
| GSM4626770_ACTTGTTTTCGGTTAAC-1 | GSM4626770 | OA |
| GSM4626770_ACTTGTTTCTTGCAAG-1  | GSM4626770 | OA |
| GSM4626770_ACTTTCAAGCGCCTCA-1  | GSM4626770 | OA |
| GSM4626770_ACTTTCAAGCGTCTAT-1  | GSM4626770 | OA |
| GSM4626770_ACTTTCACAAATAGAGT-1 | GSM4626770 | OA |
| GSM4626770_ACTTTCACACAAGCCC-1  | GSM4626770 | OA |
| GSM4626770_ACTTTCACATTGGGCC-1  | GSM4626770 | OA |
| GSM4626770_ACTTTCAGTTCCACTC-1  | GSM4626770 | OA |
| GSM4626770_ACTTTCATCAGTCCCT-1  | GSM4626770 | OA |
| GSM4626770_ACTTTCATCGGAGGTA-1  | GSM4626770 | OA |
| GSM4626770_ACTTTCATCGTAGGAG-1  | GSM4626770 | OA |
| GSM4626770_AGAATAGAGATGGGTC-1  | GSM4626770 | OA |
| GSM4626770_AGAATAGAGTCACGCC-1  | GSM4626770 | OA |
| GSM4626770_AGAATAGCAAGCTGTT-1  | GSM4626770 | OA |
| GSM4626770_AGAATAGCAATGACCT-1  | GSM4626770 | OA |
| GSM4626770_AGAATAGCAGTCGATT-1  | GSM4626770 | OA |
| GSM4626770_AGAATAGGTGCAGACA-1  | GSM4626770 | OA |
| GSM4626770_AGAATAGTCGACCAGC-1  | GSM4626770 | OA |
| GSM4626770_AGACGTTAGCCTATGT-1  | GSM4626770 | OA |
| GSM4626770_AGACGTTTCATCATCCC-1 | GSM4626770 | OA |
| GSM4626770_AGACGTTGTAAACACA-1  | GSM4626770 | OA |
| GSM4626770_AGACGTTTTCAGCGATT-1 | GSM4626770 | OA |
| GSM4626770_AGACGTTTCTATTCA-1   | GSM4626770 | OA |
| GSM4626770_AGACGTTTTCGTCCGTT-1 | GSM4626770 | OA |
| GSM4626770_AGACGTTTCTAACCGA-1  | GSM4626770 | OA |
| GSM4626770_AGAGCGACACCAACCG-1  | GSM4626770 | OA |

|                                |            |    |
|--------------------------------|------------|----|
| GSM4626770_AGAGCGACAGGCTCAC-1  | GSM4626770 | OA |
| GSM4626770_AGAGCGAGTCTACCTC-1  | GSM4626770 | OA |
| GSM4626770_AGAGCGATCAGCTTAG-1  | GSM4626770 | OA |
| GSM4626770_AGAGCTTCAATGGAGC-1  | GSM4626770 | OA |
| GSM4626770_AGAGCTTCACTGTTAG-1  | GSM4626770 | OA |
| GSM4626770_AGAGCTTGTAGAGGAA-1  | GSM4626770 | OA |
| GSM4626770_AGAGCTTTCAGTGTTG-1  | GSM4626770 | OA |
| GSM4626770_AGAGCTTTCATCGGAT-1  | GSM4626770 | OA |
| GSM4626770_AGAGCTTTCCTAAGCCA-1 | GSM4626770 | OA |
| GSM4626770_AGAGTGGAGCCAGGAT-1  | GSM4626770 | OA |
| GSM4626770_AGAGTGGAGTGAACAT-1  | GSM4626770 | OA |
| GSM4626770_AGAGTGGCATGGTAGG-1  | GSM4626770 | OA |
| GSM4626770_AGAGTGGGTCATATGC-1  | GSM4626770 | OA |
| GSM4626770_AGAGTGGGTTAAGTAG-1  | GSM4626770 | OA |
| GSM4626770_AGAGTGGTCGTCGGTT-1  | GSM4626770 | OA |
| GSM4626770_AGATCTGAGATAGGAG-1  | GSM4626770 | OA |
| GSM4626770_AGATCTGCAAAGTGCG-1  | GSM4626770 | OA |
| GSM4626770_AGATCTGGTGAAGGCT-1  | GSM4626770 | OA |
| GSM4626770_AGATTGCAGACAATAC-1  | GSM4626770 | OA |
| GSM4626770_AGATTGCAGTGAATTG-1  | GSM4626770 | OA |
| GSM4626770_AGATTGCCAGATGAGC-1  | GSM4626770 | OA |
| GSM4626770_AGATTGCCATTTGCTT-1  | GSM4626770 | OA |
| GSM4626770_AGATTGCGTACCATCA-1  | GSM4626770 | OA |
| GSM4626770_AGATTGCGTGATAAGT-1  | GSM4626770 | OA |
| GSM4626770_AGATTGCTCCGTCATC-1  | GSM4626770 | OA |
| GSM4626770_AGATTGCTCGTACGGC-1  | GSM4626770 | OA |
| GSM4626770_AGCAGCCAGTTGTAGA-1  | GSM4626770 | OA |
| GSM4626770_AGCAGCCCAGTACACT-1  | GSM4626770 | OA |
| GSM4626770_AGCAGCCGTCTTCAAG-1  | GSM4626770 | OA |
| GSM4626770_AGCAGCCGTGAGGCTA-1  | GSM4626770 | OA |
| GSM4626770_AGCATACTCACATAGC-1  | GSM4626770 | OA |
| GSM4626770_AGCATACTCATCGATG-1  | GSM4626770 | OA |
| GSM4626770_AGCCTAAAGAAACGCC-1  | GSM4626770 | OA |
| GSM4626770_AGCCTAAAGGCCCTTG-1  | GSM4626770 | OA |
| GSM4626770_AGCCTAAGTCCTCCAT-1  | GSM4626770 | OA |
| GSM4626770_AGCCTAATCACGACTA-1  | GSM4626770 | OA |
| GSM4626770_AGCCTAATCCTCAATT-1  | GSM4626770 | OA |
| GSM4626770_AGCGGTCAGAGTGAGA-1  | GSM4626770 | OA |
| GSM4626770_AGCGGTCAGTCCGTAT-1  | GSM4626770 | OA |
| GSM4626770_AGCGGTCAGTGTACTC-1  | GSM4626770 | OA |
| GSM4626770_AGCGGTCAGCTGCTG-1   | GSM4626770 | OA |
| GSM4626770_AGCGGTCGTCACCTAA-1  | GSM4626770 | OA |
| GSM4626770_AGCGGTCGTCCTGCTC-1  | GSM4626770 | OA |
| GSM4626770_AGCGGTCGTCGTTTC-1   | GSM4626770 | OA |
| GSM4626770_AGCGGTCGTGGGTATG-1  | GSM4626770 | OA |
| GSM4626770_AGCGTATAGCAGGCTA-1  | GSM4626770 | OA |
| GSM4626770_AGCGTATCACGACAA-1   | GSM4626770 | OA |
| GSM4626770_AGCGTATCAGGTTTCA-1  | GSM4626770 | OA |
| GSM4626770_AGCGTATCATGCTAGT-1  | GSM4626770 | OA |
| GSM4626770_AGCGTATGTACCTACA-1  | GSM4626770 | OA |
| GSM4626770_AGCGTATGTGCGCTTG-1  | GSM4626770 | OA |
| GSM4626770_AGCGTATGTGTGACGA-1  | GSM4626770 | OA |
| GSM4626770_AGCGTATGTTTCGCTC-1  | GSM4626770 | OA |
| GSM4626770_AGCGTATTCCACGTGG-1  | GSM4626770 | OA |
| GSM4626770_AGCGTCGGTTGGTTTG-1  | GSM4626770 | OA |
| GSM4626770_AGCGTCGTCCGCGCAA-1  | GSM4626770 | OA |
| GSM4626770_AGCGTCGTCTCGCTTG-1  | GSM4626770 | OA |

|                               |            |    |
|-------------------------------|------------|----|
| GSM4626770_AGCTCCTAGCCACGCT-1 | GSM4626770 | OA |
| GSM4626770_AGCTCCTAGTAATCCC-1 | GSM4626770 | OA |
| GSM4626770_AGCTCCTCAGCTCGAC-1 | GSM4626770 | OA |
| GSM4626770_AGCTCCTGTTACGGAG-1 | GSM4626770 | OA |
| GSM4626770_AGCTCTCAGCAGACTG-1 | GSM4626770 | OA |
| GSM4626770_AGCTCTCAGGGCATGT-1 | GSM4626770 | OA |
| GSM4626770_AGCTCTCGTCAGCTAT-1 | GSM4626770 | OA |
| GSM4626770_AGCTCTCGTGACCAAG-1 | GSM4626770 | OA |
| GSM4626770_AGCTTGAAGTGTTGAA-1 | GSM4626770 | OA |
| GSM4626770_AGCTTGACAATCCGAT-1 | GSM4626770 | OA |
| GSM4626770_AGCTTGACACGAGAGT-1 | GSM4626770 | OA |
| GSM4626770_AGCTTGACACGTGAGA-1 | GSM4626770 | OA |
| GSM4626770_AGCTTGACAGGGATTG-1 | GSM4626770 | OA |
| GSM4626770_AGCTTGACATTCACTT-1 | GSM4626770 | OA |
| GSM4626770_AGCTTGACATTGGTAC-1 | GSM4626770 | OA |
| GSM4626770_AGCTTGATCAGCTGGC-1 | GSM4626770 | OA |
| GSM4626770_AGCTTGATCCGTAGTA-1 | GSM4626770 | OA |
| GSM4626770_AGGCCACAGGTAGCTG-1 | GSM4626770 | OA |
| GSM4626770_AGGCCACCAACAACCT-1 | GSM4626770 | OA |
| GSM4626770_AGGCCACCACCCTATC-1 | GSM4626770 | OA |
| GSM4626770_AGGCCACCACGGATAG-1 | GSM4626770 | OA |
| GSM4626770_AGGCCACGTCACAAGG-1 | GSM4626770 | OA |
| GSM4626770_AGGCCACGTCTAGTGT-1 | GSM4626770 | OA |
| GSM4626770_AGGCCACTCAGTACGT-1 | GSM4626770 | OA |
| GSM4626770_AGGCCGTAGACGCACA-1 | GSM4626770 | OA |
| GSM4626770_AGGCCGTCATCCGGGT-1 | GSM4626770 | OA |
| GSM4626770_AGGCCGTGTACAAGTA-1 | GSM4626770 | OA |
| GSM4626770_AGGCCGTGTAGATTAG-1 | GSM4626770 | OA |
| GSM4626770_AGGCCGTGTCAGCTAT-1 | GSM4626770 | OA |
| GSM4626770_AGGCCGTGTTACTGAC-1 | GSM4626770 | OA |
| GSM4626770_AGGCCGTTCCTACAGA-1 | GSM4626770 | OA |
| GSM4626770_AGGCCGTTCCTGCCAT-1 | GSM4626770 | OA |
| GSM4626770_AGGCCGTTCTTATCTG-1 | GSM4626770 | OA |
| GSM4626770_AGGGAGTAGACAAGCC-1 | GSM4626770 | OA |
| GSM4626770_AGGGAGTAGGTAAACT-1 | GSM4626770 | OA |
| GSM4626770_AGGGAGTCAGTATGCT-1 | GSM4626770 | OA |
| GSM4626770_AGGGAGTCATCCTTGC-1 | GSM4626770 | OA |
| GSM4626770_AGGGAGTGTTGATTCG-1 | GSM4626770 | OA |
| GSM4626770_AGGGAGTTCGCATAA-1  | GSM4626770 | OA |
| GSM4626770_AGGGAGTTCCTGTATC-1 | GSM4626770 | OA |
| GSM4626770_AGGGATGAGCGTAATA-1 | GSM4626770 | OA |
| GSM4626770_AGGGATGCAACCGCCA-1 | GSM4626770 | OA |
| GSM4626770_AGGGATGCAATACGCT-1 | GSM4626770 | OA |
| GSM4626770_AGGGATGGTTCGGTCT-1 | GSM4626770 | OA |
| GSM4626770_AGGGATGGTGCCTGTG-1 | GSM4626770 | OA |
| GSM4626770_AGGGATGTCATTGCC-1  | GSM4626770 | OA |
| GSM4626770_AGGGATGTCCACTCCA-1 | GSM4626770 | OA |
| GSM4626770_AGGGTGAAGGGTGTGT-1 | GSM4626770 | OA |
| GSM4626770_AGGGTGACACAGGAGT-1 | GSM4626770 | OA |
| GSM4626770_AGGGTGAGTGTGTGCC-1 | GSM4626770 | OA |
| GSM4626770_AGGGTGAGTTGCGCAC-1 | GSM4626770 | OA |
| GSM4626770_AGGTCATAGACTTGAA-1 | GSM4626770 | OA |
| GSM4626770_AGGTCATAGCAGCGTA-1 | GSM4626770 | OA |
| GSM4626770_AGGTCATAGTGTACCT-1 | GSM4626770 | OA |
| GSM4626770_AGGTCATCATCCGTGG-1 | GSM4626770 | OA |
| GSM4626770_AGGTCATGTACACGC-1  | GSM4626770 | OA |
| GSM4626770_AGGTCATGTGCACTTA-1 | GSM4626770 | OA |





|                               |            |    |
|-------------------------------|------------|----|
| GSM4626770_ATAACGCGTCCAAGTT-1 | GSM4626770 | OA |
| GSM4626770_ATAACGCGTTGACGTT-1 | GSM4626770 | OA |
| GSM4626770_ATAACGCTCGGCCGAT-1 | GSM4626770 | OA |
| GSM4626770_ATAAGAGAGACCTTTG-1 | GSM4626770 | OA |
| GSM4626770_ATAAGAGAGCTGTTCA-1 | GSM4626770 | OA |
| GSM4626770_ATAAGAGCACTTCGAA-1 | GSM4626770 | OA |
| GSM4626770_ATAAGAGCAGACAGGT-1 | GSM4626770 | OA |
| GSM4626770_ATAAGAGGTCTCATCC-1 | GSM4626770 | OA |
| GSM4626770_ATAAGAGGTTTAGGAA-1 | GSM4626770 | OA |
| GSM4626770_ATAAGAGTCAACACAC-1 | GSM4626770 | OA |
| GSM4626770_ATAGACCAGGATGGAA-1 | GSM4626770 | OA |
| GSM4626770_ATAGACCCAATAGAGT-1 | GSM4626770 | OA |
| GSM4626770_ATAGACCCAATGTTGC-1 | GSM4626770 | OA |
| GSM4626770_ATAGACCTCGGTGTCG-1 | GSM4626770 | OA |
| GSM4626770_ATAGACCTCGTTGACA-1 | GSM4626770 | OA |
| GSM4626770_ATCACGAAGCTAGCCC-1 | GSM4626770 | OA |
| GSM4626770_ATCACGAAGCTTTGGT-1 | GSM4626770 | OA |
| GSM4626770_ATCACGAAGGCTAGAC-1 | GSM4626770 | OA |
| GSM4626770_ATCACGACACAGGTTT-1 | GSM4626770 | OA |
| GSM4626770_ATCACGAGTCCAGTTA-1 | GSM4626770 | OA |
| GSM4626770_ATCACGATCCACGCAG-1 | GSM4626770 | OA |
| GSM4626770_ATCACGATCCGTAGTA-1 | GSM4626770 | OA |
| GSM4626770_ATCACGATCTGCGACG-1 | GSM4626770 | OA |
| GSM4626770_ATCACGATCTGTCTCG-1 | GSM4626770 | OA |
| GSM4626770_ATCATCTAGTACGATA-1 | GSM4626770 | OA |
| GSM4626770_ATCATCTCAATGCCAT-1 | GSM4626770 | OA |
| GSM4626770_ATCATCTCACAGGTTT-1 | GSM4626770 | OA |
| GSM4626770_ATCATCTCACGAAATA-1 | GSM4626770 | OA |
| GSM4626770_ATCATCTCATCGGAAG-1 | GSM4626770 | OA |
| GSM4626770_ATCATCTGTCCGCTGA-1 | GSM4626770 | OA |
| GSM4626770_ATCATCTGTGACCAAG-1 | GSM4626770 | OA |
| GSM4626770_ATCATCTGTGTATGGG-1 | GSM4626770 | OA |
| GSM4626770_ATCATCTTCACTCCTG-1 | GSM4626770 | OA |
| GSM4626770_ATCATCTTCCAAGTA-1  | GSM4626770 | OA |
| GSM4626770_ATCATCTTCGGGAGTA-1 | GSM4626770 | OA |
| GSM4626770_ATCATCTTCTCAAGTG-1 | GSM4626770 | OA |
| GSM4626770_ATCATCTTCTGGCGTG-1 | GSM4626770 | OA |
| GSM4626770_ATCATGGAGCGATCCC-1 | GSM4626770 | OA |
| GSM4626770_ATCATGGAGTAAGTAC-1 | GSM4626770 | OA |
| GSM4626770_ATCATGGAGTTAGGTA-1 | GSM4626770 | OA |
| GSM4626770_ATCATGGCAACGATGG-1 | GSM4626770 | OA |
| GSM4626770_ATCATGGCAACTTGAC-1 | GSM4626770 | OA |
| GSM4626770_ATCATGGCAAGTTCTG-1 | GSM4626770 | OA |
| GSM4626770_ATCATGGCATGCTGGC-1 | GSM4626770 | OA |
| GSM4626770_ATCATGGGTCCGCATG-1 | GSM4626770 | OA |
| GSM4626770_ATCATGGGTTAAAGTG-1 | GSM4626770 | OA |
| GSM4626770_ATCCACCAGGAATTAC-1 | GSM4626770 | OA |
| GSM4626770_ATCCACCAGTACATGA-1 | GSM4626770 | OA |
| GSM4626770_ATCCACCCAAATCCGT-1 | GSM4626770 | OA |
| GSM4626770_ATCCACCCAAGAGTCG-1 | GSM4626770 | OA |
| GSM4626770_ATCCACCCAAGCGAGT-1 | GSM4626770 | OA |
| GSM4626770_ATCCACCCACATTTCT-1 | GSM4626770 | OA |
| GSM4626770_ATCCACCCACTACAGT-1 | GSM4626770 | OA |
| GSM4626770_ATCCACCCAGACAAGC-1 | GSM4626770 | OA |
| GSM4626770_ATCCACCGTCCCTACT-1 | GSM4626770 | OA |
| GSM4626770_ATCCACCGTGCGCTTG-1 | GSM4626770 | OA |
| GSM4626770_ATCCACCTCAGCATGT-1 | GSM4626770 | OA |

|                                |            |    |
|--------------------------------|------------|----|
| GSM4626770_ATCCACCTCTCTAAGG-1  | GSM4626770 | OA |
| GSM4626770_ATCCACCTCTTCGAGA-1  | GSM4626770 | OA |
| GSM4626770_ATCCGAAAGTCAAGCG-1  | GSM4626770 | OA |
| GSM4626770_ATCCGAAAGTGGAGAA-1  | GSM4626770 | OA |
| GSM4626770_ATCCGAACACCGAAAG-1  | GSM4626770 | OA |
| GSM4626770_ATCCGAAGTAAGCACG-1  | GSM4626770 | OA |
| GSM4626770_ATCCGAAGTCTCATCC-1  | GSM4626770 | OA |
| GSM4626770_ATCCGAATCGTCTGCT-1  | GSM4626770 | OA |
| GSM4626770_ATCCGAATCTCAAACG-1  | GSM4626770 | OA |
| GSM4626770_ATCGAGTCAATGTTGC-1  | GSM4626770 | OA |
| GSM4626770_ATCGAGTCATCCCACT-1  | GSM4626770 | OA |
| GSM4626770_ATCGAGTGTTAGATGA-1  | GSM4626770 | OA |
| GSM4626770_ATCGAGTGTTGATTGC-1  | GSM4626770 | OA |
| GSM4626770_ATCTACTAGTACACCT-1  | GSM4626770 | OA |
| GSM4626770_ATCTACTCAGCGATCC-1  | GSM4626770 | OA |
| GSM4626770_ATCTACTCAGGGTTAG-1  | GSM4626770 | OA |
| GSM4626770_ATCTACTCATTAACCG-1  | GSM4626770 | OA |
| GSM4626770_ATCTACTGTGTGACGA-1  | GSM4626770 | OA |
| GSM4626770_ATCTACTGTTACCAGT-1  | GSM4626770 | OA |
| GSM4626770_ATCTACTTCCACTGGG-1  | GSM4626770 | OA |
| GSM4626770_ATCTACTTCCGAACGC-1  | GSM4626770 | OA |
| GSM4626770_ATCTGCCAGCGAAGGG-1  | GSM4626770 | OA |
| GSM4626770_ATCTGCCAGCGCTTAT-1  | GSM4626770 | OA |
| GSM4626770_ATCTGCCAGTGTCTCA-1  | GSM4626770 | OA |
| GSM4626770_ATCTGCCCAAAGTGCG-1  | GSM4626770 | OA |
| GSM4626770_ATCTGCCCATACTACG-1  | GSM4626770 | OA |
| GSM4626770_ATCTGCCGTCTTCGTC-1  | GSM4626770 | OA |
| GSM4626770_ATCTGCCTCACAAACC-1  | GSM4626770 | OA |
| GSM4626770_ATCTGCCTCCGCTGTT-1  | GSM4626770 | OA |
| GSM4626770_ATGAGGGAGGCGATAC-1  | GSM4626770 | OA |
| GSM4626770_ATGAGGGAGTTTTCGT-1  | GSM4626770 | OA |
| GSM4626770_ATGAGGGCACTGTGTA-1  | GSM4626770 | OA |
| GSM4626770_ATGAGGGTCCTGCCAT-1  | GSM4626770 | OA |
| GSM4626770_ATGCGATAGTATCGAA-1  | GSM4626770 | OA |
| GSM4626770_ATGCGATCAACTTGAC-1  | GSM4626770 | OA |
| GSM4626770_ATGCGATCAGGCTGAA-1  | GSM4626770 | OA |
| GSM4626770_ATGCGATCATAACCTG-1  | GSM4626770 | OA |
| GSM4626770_ATGCGATGTCTCTTAT-1  | GSM4626770 | OA |
| GSM4626770_ATGCGATGTTGTCTTT-1  | GSM4626770 | OA |
| GSM4626770_ATGCGATTTCAGGCCCA-1 | GSM4626770 | OA |
| GSM4626770_ATGCGATTCTGCCAT-1   | GSM4626770 | OA |
| GSM4626770_ATGGGAGAGGAGTTTA-1  | GSM4626770 | OA |
| GSM4626770_ATGGGAGCATAACAGCT-1 | GSM4626770 | OA |
| GSM4626770_ATGGGAGGTGACCAAG-1  | GSM4626770 | OA |
| GSM4626770_ATGGGAGGTTACCTC-1   | GSM4626770 | OA |
| GSM4626770_ATGGGAGTCAAAGACA-1  | GSM4626770 | OA |
| GSM4626770_ATGGGAGTCTCTAAGG-1  | GSM4626770 | OA |
| GSM4626770_ATGTGTGCAAGCGCTC-1  | GSM4626770 | OA |
| GSM4626770_ATGTGTGCAAGCTGGA-1  | GSM4626770 | OA |
| GSM4626770_ATGTGTGCATTTGCTT-1  | GSM4626770 | OA |
| GSM4626770_ATGTGTGGTACGCTGC-1  | GSM4626770 | OA |
| GSM4626770_ATGTGTGGTATATGGA-1  | GSM4626770 | OA |
| GSM4626770_ATGTGTGGTCAGTGGA-1  | GSM4626770 | OA |
| GSM4626770_ATGTGTGGTCCGAGTC-1  | GSM4626770 | OA |
| GSM4626770_ATTACTCAGCTACCGC-1  | GSM4626770 | OA |
| GSM4626770_ATTACTCCACCCAGTG-1  | GSM4626770 | OA |
| GSM4626770_ATTACTCCAGTATCTG-1  | GSM4626770 | OA |

|                                |            |    |
|--------------------------------|------------|----|
| GSM4626770_ATTACTCTCAGAGCTT-1  | GSM4626770 | OA |
| GSM4626770_ATTATCCCACGGCGTT-1  | GSM4626770 | OA |
| GSM4626770_ATTATCCCATATGAGA-1  | GSM4626770 | OA |
| GSM4626770_ATTATCCGTTAAGGGC-1  | GSM4626770 | OA |
| GSM4626770_ATTATCCTCTCTAAGG-1  | GSM4626770 | OA |
| GSM4626770_ATTCTACAGCGAAGGG-1  | GSM4626770 | OA |
| GSM4626770_ATTCTACAGTACGCC-1   | GSM4626770 | OA |
| GSM4626770_ATTCTACCAAAGGAAG-1  | GSM4626770 | OA |
| GSM4626770_ATTCTACGTTCGTGAT-1  | GSM4626770 | OA |
| GSM4626770_ATTCTACTCCTCGCAT-1  | GSM4626770 | OA |
| GSM4626770_ATTGGACAGATGGGTC-1  | GSM4626770 | OA |
| GSM4626770_ATTGGACCAATAACGA-1  | GSM4626770 | OA |
| GSM4626770_ATTGGACCACGCATCG-1  | GSM4626770 | OA |
| GSM4626770_ATTGGACCATGCTGGC-1  | GSM4626770 | OA |
| GSM4626770_ATTGGACGTGAAAGAG-1  | GSM4626770 | OA |
| GSM4626770_ATTGGACGTGGTAACG-1  | GSM4626770 | OA |
| GSM4626770_ATTGGACTCGCAAAC-1   | GSM4626770 | OA |
| GSM4626770_ATTGGTGAGTACCGGA-1  | GSM4626770 | OA |
| GSM4626770_ATTGGTGAGTTCGCGC-1  | GSM4626770 | OA |
| GSM4626770_ATTGGTGCAGATGGGT-1  | GSM4626770 | OA |
| GSM4626770_ATTGGTGCATGTTCCC-1  | GSM4626770 | OA |
| GSM4626770_ATTGGTGGTCGAAAGC-1  | GSM4626770 | OA |
| GSM4626770_ATTGGTGGTTACCGAT-1  | GSM4626770 | OA |
| GSM4626770_ATTGGTGGTTCGTGAT-1  | GSM4626770 | OA |
| GSM4626770_ATTGGTGTCCCTCAGT-1  | GSM4626770 | OA |
| GSM4626770_ATTTCTGAGACTACAA-1  | GSM4626770 | OA |
| GSM4626770_ATTTCTGAGCGATTCT-1  | GSM4626770 | OA |
| GSM4626770_ATTTCTGCATGCAATC-1  | GSM4626770 | OA |
| GSM4626770_ATTTCTGGTTAGGGTG-1  | GSM4626770 | OA |
| GSM4626770_ATTTCTGTCACCGGGT-1  | GSM4626770 | OA |
| GSM4626770_ATTTCTGTCGGCGGTT-1  | GSM4626770 | OA |
| GSM4626770_CAACCAAAGCCCAACC-1  | GSM4626770 | OA |
| GSM4626770_CAACCAACAGCTGCTG-1  | GSM4626770 | OA |
| GSM4626770_CAACCAACATTTTCAGG-1 | GSM4626770 | OA |
| GSM4626770_CAACCAAGTCACACGC-1  | GSM4626770 | OA |
| GSM4626770_CAACCAATCATTTGGG-1  | GSM4626770 | OA |
| GSM4626770_CAACCAATCTACGAGT-1  | GSM4626770 | OA |
| GSM4626770_CAACCTCAGATACACA-1  | GSM4626770 | OA |
| GSM4626770_CAACCTCAGCAGGTCA-1  | GSM4626770 | OA |
| GSM4626770_CAACCTCAGTCTTGCA-1  | GSM4626770 | OA |
| GSM4626770_CAACCTCCAGCTGTTA-1  | GSM4626770 | OA |
| GSM4626770_CAACCTCCAGTATGCT-1  | GSM4626770 | OA |
| GSM4626770_CAACCTCCATATGGTC-1  | GSM4626770 | OA |
| GSM4626770_CAACCTCGTACTCTCC-1  | GSM4626770 | OA |
| GSM4626770_CAACCTCGTATCGCAT-1  | GSM4626770 | OA |
| GSM4626770_CAACCTAGAGGTGACCA-1 | GSM4626770 | OA |
| GSM4626770_CAACCTAGAGTACCGGA-1 | GSM4626770 | OA |
| GSM4626770_CAACCTAGCACAGGAGT-1 | GSM4626770 | OA |
| GSM4626770_CAACCTAGCACGAAAGC-1 | GSM4626770 | OA |
| GSM4626770_CAACCTAGGTCTTGATG-1 | GSM4626770 | OA |
| GSM4626770_CAACCTAGTCGAACTGT-1 | GSM4626770 | OA |
| GSM4626770_CAACCTAGTCTACTCAT-1 | GSM4626770 | OA |
| GSM4626770_CAACCTAGTCTTGCAAG-1 | GSM4626770 | OA |
| GSM4626770_CAAGAAACATATGAGA-1  | GSM4626770 | OA |
| GSM4626770_CAAGAAAGTGACTCAT-1  | GSM4626770 | OA |
| GSM4626770_CAAGAAAGTTGCCTCT-1  | GSM4626770 | OA |
| GSM4626770_CAAGAAATCGGGAGTA-1  | GSM4626770 | OA |

|                               |            |    |
|-------------------------------|------------|----|
| GSM4626770_CAAGAAATCTAGAGTC-1 | GSM4626770 | OA |
| GSM4626770_CAAGATCAGCGACGTA-1 | GSM4626770 | OA |
| GSM4626770_CAAGATCAGGTTACCT-1 | GSM4626770 | OA |
| GSM4626770_CAAGATCAGTCGAGTG-1 | GSM4626770 | OA |
| GSM4626770_CAAGATCGTCCTAGCG-1 | GSM4626770 | OA |
| GSM4626770_CAAGATCGTGTGACCC-1 | GSM4626770 | OA |
| GSM4626770_CAAGATCTCAATCACG-1 | GSM4626770 | OA |
| GSM4626770_CAAGATCTCGCAAAC-1  | GSM4626770 | OA |
| GSM4626770_CAAGGCCAGAGGGATA-1 | GSM4626770 | OA |
| GSM4626770_CAAGGCCAGTTTAGGA-1 | GSM4626770 | OA |
| GSM4626770_CAAGGCCTCCGAATGT-1 | GSM4626770 | OA |
| GSM4626770_CAAGGCCTCGATGAGG-1 | GSM4626770 | OA |
| GSM4626770_CAAGGCCTCGCGGATC-1 | GSM4626770 | OA |
| GSM4626770_CAAGTTGAGAGCTGCA-1 | GSM4626770 | OA |
| GSM4626770_CAAGTTGAGCAATCTC-1 | GSM4626770 | OA |
| GSM4626770_CAAGTTGAGGCTAGAC-1 | GSM4626770 | OA |
| GSM4626770_CAAGTTGAGTCCATAC-1 | GSM4626770 | OA |
| GSM4626770_CAAGTTGCAAGCCGTC-1 | GSM4626770 | OA |
| GSM4626770_CAAGTTGCAGACAGGT-1 | GSM4626770 | OA |
| GSM4626770_CAAGTTGGTATTCTCT-1 | GSM4626770 | OA |
| GSM4626770_CAAGTTGGTGTAACGG-1 | GSM4626770 | OA |
| GSM4626770_CAAGTTGGTTGTTTGG-1 | GSM4626770 | OA |
| GSM4626770_CAAGTTGTCACTGGGC-1 | GSM4626770 | OA |
| GSM4626770_CACAAACAGCACACAG-1 | GSM4626770 | OA |
| GSM4626770_CACAAACCAACTGCGC-1 | GSM4626770 | OA |
| GSM4626770_CACAAACTCACGCATA-1 | GSM4626770 | OA |
| GSM4626770_CACACAAAGAGGACGG-1 | GSM4626770 | OA |
| GSM4626770_CACACAACACATTAGC-1 | GSM4626770 | OA |
| GSM4626770_CACACAACAGCTGGCT-1 | GSM4626770 | OA |
| GSM4626770_CACACAATCCTGCCAT-1 | GSM4626770 | OA |
| GSM4626770_CACACAATCGAGGTAG-1 | GSM4626770 | OA |
| GSM4626770_CACACAATCGTCCAGG-1 | GSM4626770 | OA |
| GSM4626770_CACACAATCTTGAGAC-1 | GSM4626770 | OA |
| GSM4626770_CACACCTAGTCCCTCT-1 | GSM4626770 | OA |
| GSM4626770_CACACCTCAAAGCAAT-1 | GSM4626770 | OA |
| GSM4626770_CACACCTCACCTTGTC-1 | GSM4626770 | OA |
| GSM4626770_CACACCTGTCCGTCAG-1 | GSM4626770 | OA |
| GSM4626770_CACACCTGTGCAGGTA-1 | GSM4626770 | OA |
| GSM4626770_CACACCTGTTAAGACA-1 | GSM4626770 | OA |
| GSM4626770_CACACCTTCTGATTCT-1 | GSM4626770 | OA |
| GSM4626770_CACACTCAGACCCACC-1 | GSM4626770 | OA |
| GSM4626770_CACACTCAGTCATGCT-1 | GSM4626770 | OA |
| GSM4626770_CACACTCCAAGCAAT-1  | GSM4626770 | OA |
| GSM4626770_CACACTCCAAGCTGAG-1 | GSM4626770 | OA |
| GSM4626770_CACACTCCACGTCAGC-1 | GSM4626770 | OA |
| GSM4626770_CACACTCCAGCTGCAC-1 | GSM4626770 | OA |
| GSM4626770_CACACTCCATTACCTT-1 | GSM4626770 | OA |
| GSM4626770_CACACTCGTGCAGACA-1 | GSM4626770 | OA |
| GSM4626770_CACAGGCGTGAAGGCT-1 | GSM4626770 | OA |
| GSM4626770_CACAGGCGTTGCGTTA-1 | GSM4626770 | OA |
| GSM4626770_CACAGGCTCAATCACG-1 | GSM4626770 | OA |
| GSM4626770_CACAGTAAGAAACGAG-1 | GSM4626770 | OA |
| GSM4626770_CACAGTACACAGAG-1   | GSM4626770 | OA |
| GSM4626770_CACAGTAGTAGAGGAA-1 | GSM4626770 | OA |
| GSM4626770_CACAGTAGTGTAACGG-1 | GSM4626770 | OA |
| GSM4626770_CACAGTATCAACACAC-1 | GSM4626770 | OA |
| GSM4626770_CACAGTATCCGTACAA-1 | GSM4626770 | OA |

|                               |            |    |
|-------------------------------|------------|----|
| GSM4626770_CACATAGCACCGAATT-1 | GSM4626770 | OA |
| GSM4626770_CACATAGCAGCTTAAC-1 | GSM4626770 | OA |
| GSM4626770_CACATTTAGCTACCTA-1 | GSM4626770 | OA |
| GSM4626770_CACATTTAGTGAACAT-1 | GSM4626770 | OA |
| GSM4626770_CACATTTGTTAAAGAC-1 | GSM4626770 | OA |
| GSM4626770_CACATTTTCATACGGT-1 | GSM4626770 | OA |
| GSM4626770_CACATTTTCCCTCAGT-1 | GSM4626770 | OA |
| GSM4626770_CACCACTAGGTGTTAA-1 | GSM4626770 | OA |
| GSM4626770_CACCACTAGTGTCCAT-1 | GSM4626770 | OA |
| GSM4626770_CACCACTAGTTAGCGG-1 | GSM4626770 | OA |
| GSM4626770_CACCACTCAAAGGCGT-1 | GSM4626770 | OA |
| GSM4626770_CACCACTCAACGATCT-1 | GSM4626770 | OA |
| GSM4626770_CACCACTCACCGAAAG-1 | GSM4626770 | OA |
| GSM4626770_CACCACTCACGGTAAG-1 | GSM4626770 | OA |
| GSM4626770_CACCACTGTAACGACG-1 | GSM4626770 | OA |
| GSM4626770_CACCACTGTACAGTGG-1 | GSM4626770 | OA |
| GSM4626770_CACCACTGTGTAACGG-1 | GSM4626770 | OA |
| GSM4626770_CACCACTTCAGGCCCA-1 | GSM4626770 | OA |
| GSM4626770_CACCAGGAGAGAGCTC-1 | GSM4626770 | OA |
| GSM4626770_CACCAGGCAAGAAAGG-1 | GSM4626770 | OA |
| GSM4626770_CACCAGGCACACTGCG-1 | GSM4626770 | OA |
| GSM4626770_CACCAGGCAGGAATCG-1 | GSM4626770 | OA |
| GSM4626770_CACCAGGTCATCTGCC-1 | GSM4626770 | OA |
| GSM4626770_CACCTTGAGAAACCTA-1 | GSM4626770 | OA |
| GSM4626770_CACCTTGCACGACGAA-1 | GSM4626770 | OA |
| GSM4626770_CACCTTGCCTGAAGG-1  | GSM4626770 | OA |
| GSM4626770_CACCTTGCCTTAAGC-1  | GSM4626770 | OA |
| GSM4626770_CACCTTGCAGTCCTTC-1 | GSM4626770 | OA |
| GSM4626770_CACCTTGGTGAACCTT-1 | GSM4626770 | OA |
| GSM4626770_CACCTTGGTGAAAGA-1  | GSM4626770 | OA |
| GSM4626770_CACTCCAAGCCGATTT-1 | GSM4626770 | OA |
| GSM4626770_CACTCCAAGTGTCCAT-1 | GSM4626770 | OA |
| GSM4626770_CACTCCAAGTTAAGTG-1 | GSM4626770 | OA |
| GSM4626770_CACTCCACACATGGGA-1 | GSM4626770 | OA |
| GSM4626770_CACTCCAGTCACAAGG-1 | GSM4626770 | OA |
| GSM4626770_CACTCCAGTGCACGAA-1 | GSM4626770 | OA |
| GSM4626770_CACTCCATCAATCTCT-1 | GSM4626770 | OA |
| GSM4626770_CACTCCATCAGAAATG-1 | GSM4626770 | OA |
| GSM4626770_CACTCCATCGCTTAGA-1 | GSM4626770 | OA |
| GSM4626770_CAGAATCAGCTATGCT-1 | GSM4626770 | OA |
| GSM4626770_CAGAATCCATCACAAC-1 | GSM4626770 | OA |
| GSM4626770_CAGAATCCATCGATGT-1 | GSM4626770 | OA |
| GSM4626770_CAGAATCGTGTGACCC-1 | GSM4626770 | OA |
| GSM4626770_CAGAATCTCACGACTA-1 | GSM4626770 | OA |
| GSM4626770_CAGAATCTCAGTTTGG-1 | GSM4626770 | OA |
| GSM4626770_CAGAATCTCGAATGCT-1 | GSM4626770 | OA |
| GSM4626770_CAGAATCTCTGCCAGG-1 | GSM4626770 | OA |
| GSM4626770_CAGAGAGAGACTAAGT-1 | GSM4626770 | OA |
| GSM4626770_CAGAGAGAGCGTCTAT-1 | GSM4626770 | OA |
| GSM4626770_CAGAGAGCACTGTTAG-1 | GSM4626770 | OA |
| GSM4626770_CAGAGAGGTGAGTGAC-1 | GSM4626770 | OA |
| GSM4626770_CAGAGAGGTGTCTGAT-1 | GSM4626770 | OA |
| GSM4626770_CAGAGAGTCATCACCC-1 | GSM4626770 | OA |
| GSM4626770_CAGATCAAGGATTCGG-1 | GSM4626770 | OA |
| GSM4626770_CAGATCAAGTACGCCC-1 | GSM4626770 | OA |
| GSM4626770_CAGATCACAAGACACG-1 | GSM4626770 | OA |
| GSM4626770_CAGATCACAGATGGCA-1 | GSM4626770 | OA |

|                                |            |    |
|--------------------------------|------------|----|
| GSM4626770_CAGATCAGTACTCAAC-1  | GSM4626770 | OA |
| GSM4626770_CAGATCAGTCATGCCG-1  | GSM4626770 | OA |
| GSM4626770_CAGATCAGTGCGAAAC-1  | GSM4626770 | OA |
| GSM4626770_CAGATCAGTTGTCTTT-1  | GSM4626770 | OA |
| GSM4626770_CAGATCATCAGGCGAA-1  | GSM4626770 | OA |
| GSM4626770_CAGATCATCTATGTGG-1  | GSM4626770 | OA |
| GSM4626770_CAGATCATCTTGTACT-1  | GSM4626770 | OA |
| GSM4626770_CAGCAGCAGAACAAC-1   | GSM4626770 | OA |
| GSM4626770_CAGCAGCAGAATAGGG-1  | GSM4626770 | OA |
| GSM4626770_CAGCAGCAGCGTTGCC-1  | GSM4626770 | OA |
| GSM4626770_CAGCAGCAGTTCGATC-1  | GSM4626770 | OA |
| GSM4626770_CAGCATAAGAGTACCG-1  | GSM4626770 | OA |
| GSM4626770_CAGCATAAGTGTACCT-1  | GSM4626770 | OA |
| GSM4626770_CAGCATAACAGTAGAGC-1 | GSM4626770 | OA |
| GSM4626770_CAGCATAACAGTGACAG-1 | GSM4626770 | OA |
| GSM4626770_CAGCATAGTCCATGAT-1  | GSM4626770 | OA |
| GSM4626770_CAGCATATCAGCCTAA-1  | GSM4626770 | OA |
| GSM4626770_CAGCCGAAGCTAACTC-1  | GSM4626770 | OA |
| GSM4626770_CAGCCGAAGTGATCGG-1  | GSM4626770 | OA |
| GSM4626770_CAGCCGACAATCGAAA-1  | GSM4626770 | OA |
| GSM4626770_CAGCCGAGTATATCCG-1  | GSM4626770 | OA |
| GSM4626770_CAGCCGAGTATCACCA-1  | GSM4626770 | OA |
| GSM4626770_CAGCCGAGTCTAGCGC-1  | GSM4626770 | OA |
| GSM4626770_CAGCCGAGTGGCAAAC-1  | GSM4626770 | OA |
| GSM4626770_CAGCCGATCATCGCTC-1  | GSM4626770 | OA |
| GSM4626770_CAGCCGATCCAAGTAC-1  | GSM4626770 | OA |
| GSM4626770_CAGCCGATCCACGACG-1  | GSM4626770 | OA |
| GSM4626770_CAGCCGATCTTTAGTC-1  | GSM4626770 | OA |
| GSM4626770_CAGCGACCAGCAGTTT-1  | GSM4626770 | OA |
| GSM4626770_CAGCGACGTTCTGTCTC-1 | GSM4626770 | OA |
| GSM4626770_CAGCGACTCCTAAGTG-1  | GSM4626770 | OA |
| GSM4626770_CAGCGACTCGGCGCTA-1  | GSM4626770 | OA |
| GSM4626770_CAGCTAAAGCCTTGAT-1  | GSM4626770 | OA |
| GSM4626770_CAGCTAAAGTTCGATC-1  | GSM4626770 | OA |
| GSM4626770_CAGCTAACAATCGGTT-1  | GSM4626770 | OA |
| GSM4626770_CAGCTAACAGCAGTTT-1  | GSM4626770 | OA |
| GSM4626770_CAGCTAATCTTCAACT-1  | GSM4626770 | OA |
| GSM4626770_CAGCTGGAGAACAAC-1   | GSM4626770 | OA |
| GSM4626770_CAGCTGGAGAACTCGG-1  | GSM4626770 | OA |
| GSM4626770_CAGCTGGAGCTTTGGT-1  | GSM4626770 | OA |
| GSM4626770_CAGCTGGCAGGAACGT-1  | GSM4626770 | OA |
| GSM4626770_CAGCTGGCATGGGAAC-1  | GSM4626770 | OA |
| GSM4626770_CAGCTGGGTTGTTTGG-1  | GSM4626770 | OA |
| GSM4626770_CAGGTGCAGAGGTACC-1  | GSM4626770 | OA |
| GSM4626770_CAGGTGCAGCCCAGCT-1  | GSM4626770 | OA |
| GSM4626770_CAGGTGCAGCGTTTAC-1  | GSM4626770 | OA |
| GSM4626770_CAGGTGCAGCTAGTTC-1  | GSM4626770 | OA |
| GSM4626770_CAGGTGCAGTCCTCCT-1  | GSM4626770 | OA |
| GSM4626770_CAGGTGCAGTTTGCCT-1  | GSM4626770 | OA |
| GSM4626770_CAGGTGCCAACACGCC-1  | GSM4626770 | OA |
| GSM4626770_CAGGTGCCATGTAAGA-1  | GSM4626770 | OA |
| GSM4626770_CAGGTGCGTCTGACTGC-1 | GSM4626770 | OA |
| GSM4626770_CAGGTGCTCCTAAGTG-1  | GSM4626770 | OA |
| GSM4626770_CAGGTGCTCCTAGAAC-1  | GSM4626770 | OA |
| GSM4626770_CAGGTGCTCGGACAAG-1  | GSM4626770 | OA |
| GSM4626770_CAGGTGCTCTCAAGTG-1  | GSM4626770 | OA |
| GSM4626770_CAGTAACGTGCGAAA-1   | GSM4626770 | OA |

|                                |            |    |
|--------------------------------|------------|----|
| GSM4626770_CAGTCCTAGCTAGGCA-1  | GSM4626770 | OA |
| GSM4626770_CAGTCCTAGTGGTCCC-1  | GSM4626770 | OA |
| GSM4626770_CAGTCCTCAAATCCGT-1  | GSM4626770 | OA |
| GSM4626770_CAGTCCTCACCGAATT-1  | GSM4626770 | OA |
| GSM4626770_CAGTCCTCACCTCGTT-1  | GSM4626770 | OA |
| GSM4626770_CAGTCCTGTATAGGGC-1  | GSM4626770 | OA |
| GSM4626770_CAGTCCTTCCACTGGG-1  | GSM4626770 | OA |
| GSM4626770_CATATGGCAGAGTGTG-1  | GSM4626770 | OA |
| GSM4626770_CATATGGCAGCTCCGA-1  | GSM4626770 | OA |
| GSM4626770_CATATGGGTTCTGAAC-1  | GSM4626770 | OA |
| GSM4626770_CATATGGTCGTCTGAA-1  | GSM4626770 | OA |
| GSM4626770_CATATGGTCTAACCGA-1  | GSM4626770 | OA |
| GSM4626770_CATATGGTCTCACATT-1  | GSM4626770 | OA |
| GSM4626770_CATATTCCAAAGTGCG-1  | GSM4626770 | OA |
| GSM4626770_CATATTCTCCGTAGTA-1  | GSM4626770 | OA |
| GSM4626770_CATCAAGAGACCTTTG-1  | GSM4626770 | OA |
| GSM4626770_CATCAAGAGCGTCAAG-1  | GSM4626770 | OA |
| GSM4626770_CATCAAGAGGGTTTCT-1  | GSM4626770 | OA |
| GSM4626770_CATCAAGAGTTTCGCAT-1 | GSM4626770 | OA |
| GSM4626770_CATCAAGCAGGTCGTC-1  | GSM4626770 | OA |
| GSM4626770_CATCAAGCATCCGCGA-1  | GSM4626770 | OA |
| GSM4626770_CATCAAGTCCACGAAT-1  | GSM4626770 | OA |
| GSM4626770_CATCAAGTCCTCCTAG-1  | GSM4626770 | OA |
| GSM4626770_CATCAAGTCGGCTTGG-1  | GSM4626770 | OA |
| GSM4626770_CATCAAGTCTCCGGTT-1  | GSM4626770 | OA |
| GSM4626770_CATCAGAAGTGCAAGC-1  | GSM4626770 | OA |
| GSM4626770_CATCAGACAGGTCCAC-1  | GSM4626770 | OA |
| GSM4626770_CATCAGAGTAAAGTCA-1  | GSM4626770 | OA |
| GSM4626770_CATCAGAGTACTTAGC-1  | GSM4626770 | OA |
| GSM4626770_CATCAGATCAGGCAAG-1  | GSM4626770 | OA |
| GSM4626770_CATCCACGTGGTACAG-1  | GSM4626770 | OA |
| GSM4626770_CATCCACGTGTTAAGA-1  | GSM4626770 | OA |
| GSM4626770_CATCCACTCCTCAACC-1  | GSM4626770 | OA |
| GSM4626770_CATCGAAAGTCTCCTC-1  | GSM4626770 | OA |
| GSM4626770_CATCGAAAGTTGTAGA-1  | GSM4626770 | OA |
| GSM4626770_CATCGAACAGTTCCCT-1  | GSM4626770 | OA |
| GSM4626770_CATCGAAGTTAAAGAC-1  | GSM4626770 | OA |
| GSM4626770_CATCGAATCATCGATG-1  | GSM4626770 | OA |
| GSM4626770_CATCGAATCCGGCACA-1  | GSM4626770 | OA |
| GSM4626770_CATCGGGAGACACGAC-1  | GSM4626770 | OA |
| GSM4626770_CATCGGGAGGAGTAGA-1  | GSM4626770 | OA |
| GSM4626770_CATCGGGCACATGTGT-1  | GSM4626770 | OA |
| GSM4626770_CATCGGGCATAACCTG-1  | GSM4626770 | OA |
| GSM4626770_CATCGGGCATGCTGGC-1  | GSM4626770 | OA |
| GSM4626770_CATCGGGGTGATGATA-1  | GSM4626770 | OA |
| GSM4626770_CATCGGGTCCATGAAC-1  | GSM4626770 | OA |
| GSM4626770_CATCGGGTCTGACCTC-1  | GSM4626770 | OA |
| GSM4626770_CATGACAAGCCAGTAG-1  | GSM4626770 | OA |
| GSM4626770_CATGACAAGGCCGAAT-1  | GSM4626770 | OA |
| GSM4626770_CATGACAAGTCGATAA-1  | GSM4626770 | OA |
| GSM4626770_CATGACACAAGTTAAG-1  | GSM4626770 | OA |
| GSM4626770_CATGACAGTCGACTGC-1  | GSM4626770 | OA |
| GSM4626770_CATGACAGTGTCTCT-1   | GSM4626770 | OA |
| GSM4626770_CATGACATCCAACCAA-1  | GSM4626770 | OA |
| GSM4626770_CATGACATCGTGGGAA-1  | GSM4626770 | OA |
| GSM4626770_CATGCCTAGAGTCTGG-1  | GSM4626770 | OA |



|                                |            |    |
|--------------------------------|------------|----|
| GSM4626770_CATGCCTAGGAGTTGC-1  | GSM4626770 | OA |
| GSM4626770_CATGCCTCACATTCGA-1  | GSM4626770 | OA |
| GSM4626770_CATGCCTCAGCGTAAG-1  | GSM4626770 | OA |
| GSM4626770_CATGCCTCAGCGTCCA-1  | GSM4626770 | OA |
| GSM4626770_CATGCCTCATACGCTA-1  | GSM4626770 | OA |
| GSM4626770_CATGCCTGTCGAGATG-1  | GSM4626770 | OA |
| GSM4626770_CATGCCTGTTAAGTAG-1  | GSM4626770 | OA |
| GSM4626770_CATGCCTGTTACCGAT-1  | GSM4626770 | OA |
| GSM4626770_CATGCCTGTTCAGACT-1  | GSM4626770 | OA |
| GSM4626770_CATGCCTTCCTTCAAT-1  | GSM4626770 | OA |
| GSM4626770_CATGCCTTCGAAATA-1   | GSM4626770 | OA |
| GSM4626770_CATGGCGAGTTGTAGA-1  | GSM4626770 | OA |
| GSM4626770_CATGGCGGTCGCTTTC-1  | GSM4626770 | OA |
| GSM4626770_CATGGCGGTCGGATCC-1  | GSM4626770 | OA |
| GSM4626770_CATGGCGGTTAGGGTG-1  | GSM4626770 | OA |
| GSM4626770_CATGGCGTCACCTCGT-1  | GSM4626770 | OA |
| GSM4626770_CATGGCGTCCGTAGGC-1  | GSM4626770 | OA |
| GSM4626770_CATGGCGTCGCAGGCT-1  | GSM4626770 | OA |
| GSM4626770_CATGGCGTCTGTACGA-1  | GSM4626770 | OA |
| GSM4626770_CATTATCAGACTTGAA-1  | GSM4626770 | OA |
| GSM4626770_CATTATCTCCAAGTA-1   | GSM4626770 | OA |
| GSM4626770_CATTATCTCGTAGATC-1  | GSM4626770 | OA |
| GSM4626770_CATTTCGAGAAGGTGA-1  | GSM4626770 | OA |
| GSM4626770_CATTTCGAGAGTAAGG-1  | GSM4626770 | OA |
| GSM4626770_CATTTCGAGCCGTCGT-1  | GSM4626770 | OA |
| GSM4626770_CATTTCGAGCTAGTCT-1  | GSM4626770 | OA |
| GSM4626770_CATTTCGAGTGCCAGA-1  | GSM4626770 | OA |
| GSM4626770_CATTTCGCCAGACTCGC-1 | GSM4626770 | OA |
| GSM4626770_CATTTCGCCATCGATGT-1 | GSM4626770 | OA |
| GSM4626770_CATTTCGCGTCGCTTTC-1 | GSM4626770 | OA |
| GSM4626770_CATTTCGCGTCTTTCAT-1 | GSM4626770 | OA |
| GSM4626770_CCAATCCAGCCACGCT-1  | GSM4626770 | OA |
| GSM4626770_CCAATCCTCCACGACG-1  | GSM4626770 | OA |
| GSM4626770_CCAATCCTCGCCGTGA-1  | GSM4626770 | OA |
| GSM4626770_CCAATCCTCTCTGAGA-1  | GSM4626770 | OA |
| GSM4626770_CCACCTAAGATGCCAG-1  | GSM4626770 | OA |
| GSM4626770_CCACCTAAGCACAGGT-1  | GSM4626770 | OA |
| GSM4626770_CCACCTACACCGATAT-1  | GSM4626770 | OA |
| GSM4626770_CCACCTACACTGTTAG-1  | GSM4626770 | OA |
| GSM4626770_CCACCTACAGAGTGTG-1  | GSM4626770 | OA |
| GSM4626770_CCACCTAGTACGCTGC-1  | GSM4626770 | OA |
| GSM4626770_CCACCTAGTTAAGACA-1  | GSM4626770 | OA |
| GSM4626770_CCACGGAAGCCCGAAA-1  | GSM4626770 | OA |
| GSM4626770_CCACGGAAGTACGCGA-1  | GSM4626770 | OA |
| GSM4626770_CCACGGAAGTCATCCA-1  | GSM4626770 | OA |
| GSM4626770_CCACGGAGTTCGCGAC-1  | GSM4626770 | OA |
| GSM4626770_CCACGGATCCCTTGCA-1  | GSM4626770 | OA |
| GSM4626770_CCACGGATCTTCGGTC-1  | GSM4626770 | OA |
| GSM4626770_CCACTACAGCCTTGAT-1  | GSM4626770 | OA |
| GSM4626770_CCACTACAGGCTACGA-1  | GSM4626770 | OA |
| GSM4626770_CCACTACCATCATCCC-1  | GSM4626770 | OA |
| GSM4626770_CCACTACGTATCACCA-1  | GSM4626770 | OA |
| GSM4626770_CCACTACGTTTAGCTG-1  | GSM4626770 | OA |
| GSM4626770_CCACTACTCAGGTAAA-1  | GSM4626770 | OA |
| GSM4626770_CCACTACTCGGTGTCG-1  | GSM4626770 | OA |
| GSM4626770_CCAGCGAAGACTAGAT-1  | GSM4626770 | OA |
| GSM4626770_CCAGCGAGTCCGTGAC-1  | GSM4626770 | OA |

|                                |            |    |
|--------------------------------|------------|----|
| GSM4626770_CCAGCGAGTCTCTTTA-1  | GSM4626770 | OA |
| GSM4626770_CCAGCGAGTGACCAAG-1  | GSM4626770 | OA |
| GSM4626770_CCAGCGATCCTAGGGC-1  | GSM4626770 | OA |
| GSM4626770_CCATGTCAGCTAGTCT-1  | GSM4626770 | OA |
| GSM4626770_CCATGTCCAGTGGGAT-1  | GSM4626770 | OA |
| GSM4626770_CCATGTCTGTGGAGA-1   | GSM4626770 | OA |
| GSM4626770_CCATGTCTGTGGGA-1    | GSM4626770 | OA |
| GSM4626770_CCATGTCTCAGTGTTG-1  | GSM4626770 | OA |
| GSM4626770_CCATGTCTCGTGGGAA-1  | GSM4626770 | OA |
| GSM4626770_CCATGTCTCTACTCAT-1  | GSM4626770 | OA |
| GSM4626770_CCATTCGCAATGAATG-1  | GSM4626770 | OA |
| GSM4626770_CCATTCGCACGGTAAG-1  | GSM4626770 | OA |
| GSM4626770_CCATTCGGTCCGCGTGT-1 | GSM4626770 | OA |
| GSM4626770_CCATTCGTCCAGTAC-1   | GSM4626770 | OA |
| GSM4626770_CCATTCGTCCGTCAAA-1  | GSM4626770 | OA |
| GSM4626770_CCATTCGTCCGTTGCT-1  | GSM4626770 | OA |
| GSM4626770_CCATTCGTCTTGTATC-1  | GSM4626770 | OA |
| GSM4626770_CCCAATCAGATCACGG-1  | GSM4626770 | OA |
| GSM4626770_CCCAATCAGGGTGTGT-1  | GSM4626770 | OA |
| GSM4626770_CCCAATCAGTCCCTCT-1  | GSM4626770 | OA |
| GSM4626770_CCCAATCCAAGTTTC-1   | GSM4626770 | OA |
| GSM4626770_CCCAATCCAATCACAC-1  | GSM4626770 | OA |
| GSM4626770_CCCAATCCAATGGAGC-1  | GSM4626770 | OA |
| GSM4626770_CCCAATCCAGTCACTA-1  | GSM4626770 | OA |
| GSM4626770_CCCAATCGTTGAGTTC-1  | GSM4626770 | OA |
| GSM4626770_CCCAGTTAGTACGTAA-1  | GSM4626770 | OA |
| GSM4626770_CCCAGTTCAGGTCGTC-1  | GSM4626770 | OA |
| GSM4626770_CCCAGTTCATCCTAGA-1  | GSM4626770 | OA |
| GSM4626770_CCCAGTTGTACACCGC-1  | GSM4626770 | OA |
| GSM4626770_CCCAGTTGTTAGATGA-1  | GSM4626770 | OA |
| GSM4626770_CCCAGTTTCAGAGGTG-1  | GSM4626770 | OA |
| GSM4626770_CCCAGTTTCATAAAGG-1  | GSM4626770 | OA |
| GSM4626770_CCCAGTTTCGCATCT-1   | GSM4626770 | OA |
| GSM4626770_CCCATACAGCCATCGC-1  | GSM4626770 | OA |
| GSM4626770_CCCATACAGGAACTGC-1  | GSM4626770 | OA |
| GSM4626770_CCCATACCAAAGTGTG-1  | GSM4626770 | OA |
| GSM4626770_CCCATACCATCCGG-1    | GSM4626770 | OA |
| GSM4626770_CCCATACCATGGGA-1    | GSM4626770 | OA |
| GSM4626770_CCCATACGTACGACCC-1  | GSM4626770 | OA |
| GSM4626770_CCCATACTCAAAGACA-1  | GSM4626770 | OA |
| GSM4626770_CCCATACTCCACTTG-1   | GSM4626770 | OA |
| GSM4626770_CCCATACTCGGACAAG-1  | GSM4626770 | OA |
| GSM4626770_CCCATACTCGTCCGTT-1  | GSM4626770 | OA |
| GSM4626770_CCCTCCTAGCGACGTA-1  | GSM4626770 | OA |
| GSM4626770_CCCTCCTAGTGAAGTT-1  | GSM4626770 | OA |
| GSM4626770_CCCTCCTCAAGCTGGA-1  | GSM4626770 | OA |
| GSM4626770_CCCTCCTCACATCCAA-1  | GSM4626770 | OA |
| GSM4626770_CCCTCCTCACTGAAGG-1  | GSM4626770 | OA |
| GSM4626770_CCCTCCTCAGGGTATG-1  | GSM4626770 | OA |
| GSM4626770_CCCTCCTCATACGCCG-1  | GSM4626770 | OA |
| GSM4626770_CCCTCCTCATCGATGT-1  | GSM4626770 | OA |
| GSM4626770_CCCTCCTGTAGCACGA-1  | GSM4626770 | OA |
| GSM4626770_CCCTCCTGTGAGTTT-1   | GSM4626770 | OA |
| GSM4626770_CCCTCCTGTGCGCTTG-1  | GSM4626770 | OA |
| GSM4626770_CCCTCCTGTGGTGTAG-1  | GSM4626770 | OA |
| GSM4626770_CCCTCCTTCAGGATCT-1  | GSM4626770 | OA |
| GSM4626770_CCCTCCTTCATCTGTT-1  | GSM4626770 | OA |

|                                |            |    |
|--------------------------------|------------|----|
| GSM4626770_CCGGGATAGGCTACGA-1  | GSM4626770 | OA |
| GSM4626770_CCGGGATAGTGTACCT-1  | GSM4626770 | OA |
| GSM4626770_CCGGGATCACGTCTCT-1  | GSM4626770 | OA |
| GSM4626770_CCGGGATGTAAGCACG-1  | GSM4626770 | OA |
| GSM4626770_CCGGGATGTTGTGGAG-1  | GSM4626770 | OA |
| GSM4626770_CCGGGATTCCGCTGTT-1  | GSM4626770 | OA |
| GSM4626770_CCGGGATTCTTCAAT-1   | GSM4626770 | OA |
| GSM4626770_CCGGGATTCTAAGCCA-1  | GSM4626770 | OA |
| GSM4626770_CCGGGATTCTCAAGTG-1  | GSM4626770 | OA |
| GSM4626770_CCGGTAGAGACAATAC-1  | GSM4626770 | OA |
| GSM4626770_CCGGTAGCAAGCGCTC-1  | GSM4626770 | OA |
| GSM4626770_CCGGTAGCACGACGAA-1  | GSM4626770 | OA |
| GSM4626770_CCGGTAGCACGGCGTT-1  | GSM4626770 | OA |
| GSM4626770_CCGGTAGGTAACGTTT-1  | GSM4626770 | OA |
| GSM4626770_CCGGTAGGTACAGACG-1  | GSM4626770 | OA |
| GSM4626770_CCGGTAGGTCTCAACA-1  | GSM4626770 | OA |
| GSM4626770_CCGGTAGGTGTGGCTC-1  | GSM4626770 | OA |
| GSM4626770_CCGGTAGGTTCAGTAC-1  | GSM4626770 | OA |
| GSM4626770_CCGTACTAGGACATTA-1  | GSM4626770 | OA |
| GSM4626770_CCGTACTCATACTACG-1  | GSM4626770 | OA |
| GSM4626770_CCGTACTGTACAGACG-1  | GSM4626770 | OA |
| GSM4626770_CCGTACTGTACCCAAT-1  | GSM4626770 | OA |
| GSM4626770_CCGTACTGTATTACCG-1  | GSM4626770 | OA |
| GSM4626770_CCGTACTTCGGACAAG-1  | GSM4626770 | OA |
| GSM4626770_CCGTACTTCTGCAGTA-1  | GSM4626770 | OA |
| GSM4626770_CCGTGGAAGCAGACTG-1  | GSM4626770 | OA |
| GSM4626770_CCGTGGAAGCGTGAGT-1  | GSM4626770 | OA |
| GSM4626770_CCGTGGAAGGCTAGCA-1  | GSM4626770 | OA |
| GSM4626770_CCGTGGAAGTCCTCCT-1  | GSM4626770 | OA |
| GSM4626770_CCGTGGACACCATCCT-1  | GSM4626770 | OA |
| GSM4626770_CCGTGGACACGGTGTC-1  | GSM4626770 | OA |
| GSM4626770_CCGTGGATCACGCATA-1  | GSM4626770 | OA |
| GSM4626770_CCGTGGATCACTTACT-1  | GSM4626770 | OA |
| GSM4626770_CCGTGGATCAGGATCT-1  | GSM4626770 | OA |
| GSM4626770_CCGTGGATCCTGCCAT-1  | GSM4626770 | OA |
| GSM4626770_CCGTGGATCGAATGGG-1  | GSM4626770 | OA |
| GSM4626770_CCGTTCAGTCTCCTC-1   | GSM4626770 | OA |
| GSM4626770_CCGTTCAGTACCCAAT-1  | GSM4626770 | OA |
| GSM4626770_CCGTTCATCAAGGTAA-1  | GSM4626770 | OA |
| GSM4626770_CCTAAAGAGGGTTCGAT-1 | GSM4626770 | OA |
| GSM4626770_CCTAAAGTCAGCACAT-1  | GSM4626770 | OA |
| GSM4626770_CCTAAAGTCCATTCTA-1  | GSM4626770 | OA |
| GSM4626770_CCTACACAGTACGACG-1  | GSM4626770 | OA |
| GSM4626770_CCTACACCACACGCTG-1  | GSM4626770 | OA |
| GSM4626770_CCTACACCATTACCTT-1  | GSM4626770 | OA |
| GSM4626770_CCTACACGTAAAGTCA-1  | GSM4626770 | OA |
| GSM4626770_CCTACACGTTGTCTTT-1  | GSM4626770 | OA |
| GSM4626770_CCTACACTCATGTCCC-1  | GSM4626770 | OA |
| GSM4626770_CCTACACTCGTGGTCG-1  | GSM4626770 | OA |
| GSM4626770_CCTACACTCTGCTTGC-1  | GSM4626770 | OA |
| GSM4626770_CCTACACTCTGTGCAA-1  | GSM4626770 | OA |
| GSM4626770_CCTACCAAGCAGCCTC-1  | GSM4626770 | OA |
| GSM4626770_CCTACCAAGTGTTAGA-1  | GSM4626770 | OA |
| GSM4626770_CCTACCACAGCGTTTCG-1 | GSM4626770 | OA |
| GSM4626770_CCTACCAGTTCTGGTA-1  | GSM4626770 | OA |
| GSM4626770_CCTACCATCACTTCAT-1  | GSM4626770 | OA |
| GSM4626770_CCTACCATCATAGCAC-1  | GSM4626770 | OA |

|                                |            |    |
|--------------------------------|------------|----|
| GSM4626770_CCTAGCTAGCAGACTG-1  | GSM4626770 | OA |
| GSM4626770_CCTAGCTAGGAGTTTA-1  | GSM4626770 | OA |
| GSM4626770_CCTAGCTCAATAGAGT-1  | GSM4626770 | OA |
| GSM4626770_CCTAGCTGTACTCTCC-1  | GSM4626770 | OA |
| GSM4626770_CCTAGCTGTGCAGACA-1  | GSM4626770 | OA |
| GSM4626770_CCTATTAAGCCACTAT-1  | GSM4626770 | OA |
| GSM4626770_CCTATTACACTTACGA-1  | GSM4626770 | OA |
| GSM4626770_CCTATTACACTTGGAT-1  | GSM4626770 | OA |
| GSM4626770_CCTATTAGTACCGTAT-1  | GSM4626770 | OA |
| GSM4626770_CCTATTATCCGAAGAG-1  | GSM4626770 | OA |
| GSM4626770_CCTCAGTAGACTGTAA-1  | GSM4626770 | OA |
| GSM4626770_CCTCAGTAGATAGCAT-1  | GSM4626770 | OA |
| GSM4626770_CCTCAGTAGCAGGCTA-1  | GSM4626770 | OA |
| GSM4626770_CCTCAGTAGCTAAACA-1  | GSM4626770 | OA |
| GSM4626770_CCTCAGTCATGGTCTA-1  | GSM4626770 | OA |
| GSM4626770_CCTCAGTGTGCCTGGT-1  | GSM4626770 | OA |
| GSM4626770_CCTCAGTTCATTGCC-1   | GSM4626770 | OA |
| GSM4626770_CCTCAGTTCACGTTT-1   | GSM4626770 | OA |
| GSM4626770_CCTCAGTTCCTTGCCA-1  | GSM4626770 | OA |
| GSM4626770_CCTCTGAGTAGGGACT-1  | GSM4626770 | OA |
| GSM4626770_CCTCTGAGTCAATGTC-1  | GSM4626770 | OA |
| GSM4626770_CCTCTGAGTTGATTGCG-1 | GSM4626770 | OA |
| GSM4626770_CCTTACGAGTGTCCCG-1  | GSM4626770 | OA |
| GSM4626770_CCTTACGCATCCGTGG-1  | GSM4626770 | OA |
| GSM4626770_CCTTACGCATTAGGCT-1  | GSM4626770 | OA |
| GSM4626770_CCTTACGGTCAGAAGC-1  | GSM4626770 | OA |
| GSM4626770_CCTTACGGTGGTTTCA-1  | GSM4626770 | OA |
| GSM4626770_CCTTACGTCAGCATGT-1  | GSM4626770 | OA |
| GSM4626770_CCTTACGTCTCCAGGG-1  | GSM4626770 | OA |
| GSM4626770_CCTTCCCAGAAACCGC-1  | GSM4626770 | OA |
| GSM4626770_CCTTCCCAGATGCCAG-1  | GSM4626770 | OA |
| GSM4626770_CCTTCCCAGCCAGGAT-1  | GSM4626770 | OA |
| GSM4626770_CCTTCCCAGCGATTCT-1  | GSM4626770 | OA |
| GSM4626770_CCTTCCCAGTCCACG-1   | GSM4626770 | OA |
| GSM4626770_CCTTCCCAGTTACGGG-1  | GSM4626770 | OA |
| GSM4626770_CCTTCCCAGTTTTCTT-1  | GSM4626770 | OA |
| GSM4626770_CCTTCCCAGCTGCTG-1   | GSM4626770 | OA |
| GSM4626770_CCTTCCCGTCATATCG-1  | GSM4626770 | OA |
| GSM4626770_CCTTCCCTCAGTACGT-1  | GSM4626770 | OA |
| GSM4626770_CCTTCCCTCCATTAT-1   | GSM4626770 | OA |
| GSM4626770_CCTTCCCTCCTGCCAT-1  | GSM4626770 | OA |
| GSM4626770_CCTTCCCTCGTACGGC-1  | GSM4626770 | OA |
| GSM4626770_CCTTTCGAAGACAAGCC-1 | GSM4626770 | OA |
| GSM4626770_CCTTTCGAAGACAGACC-1 | GSM4626770 | OA |
| GSM4626770_CCTTTCGAAGGGCACTA-1 | GSM4626770 | OA |
| GSM4626770_CCTTTCGACAAGTAATG-1 | GSM4626770 | OA |
| GSM4626770_CCTTTCGACACCGTTGG-1 | GSM4626770 | OA |
| GSM4626770_CCTTTCGACAGGAACGT-1 | GSM4626770 | OA |
| GSM4626770_CCTTTCGACAGTGGAGT-1 | GSM4626770 | OA |
| GSM4626770_CCTTTCGAGTAGCACGA-1 | GSM4626770 | OA |
| GSM4626770_CCTTTCGAGTCGAATCT-1 | GSM4626770 | OA |
| GSM4626770_CCTTTCGAGTGACCAAG-1 | GSM4626770 | OA |
| GSM4626770_CCTTTCGATCAGCGATT-1 | GSM4626770 | OA |
| GSM4626770_CCTTTCGATCATCATT-1  | GSM4626770 | OA |
| GSM4626770_CCTTTCGATCCTGCTTG-1 | GSM4626770 | OA |
| GSM4626770_CCTTTCTCAACACCCG-1  | GSM4626770 | OA |
| GSM4626770_CCTTTCTCACAGGCCT-1  | GSM4626770 | OA |

|                                |            |    |
|--------------------------------|------------|----|
| GSM4626770_CCTTTCTCACGTAAGG-1  | GSM4626770 | OA |
| GSM4626770_CCTTTCTCAGTCTTCC-1  | GSM4626770 | OA |
| GSM4626770_CCTTTCTCATTGTGCA-1  | GSM4626770 | OA |
| GSM4626770_CCTTTCTGTGCGGTA-1   | GSM4626770 | OA |
| GSM4626770_CCTTTCTGTTCAGACT-1  | GSM4626770 | OA |
| GSM4626770_CCTTTCTTCCAGTAGT-1  | GSM4626770 | OA |
| GSM4626770_CGAACATAGGACGAAA-1  | GSM4626770 | OA |
| GSM4626770_CGAACATTCTCAAACG-1  | GSM4626770 | OA |
| GSM4626770_CGAATGTAGGACATTA-1  | GSM4626770 | OA |
| GSM4626770_CGAATGTAGTAGGCCA-1  | GSM4626770 | OA |
| GSM4626770_CGAATGTCAATGGTCT-1  | GSM4626770 | OA |
| GSM4626770_CGAATGTCACCACCAG-1  | GSM4626770 | OA |
| GSM4626770_CGAATGTGTGCAACGA-1  | GSM4626770 | OA |
| GSM4626770_CGAATGTTCTCACATT-1  | GSM4626770 | OA |
| GSM4626770_CGACCTTAGTCCGTAT-1  | GSM4626770 | OA |
| GSM4626770_CGACCTTCATACGCCG-1  | GSM4626770 | OA |
| GSM4626770_CGACCTTCATGCATGT-1  | GSM4626770 | OA |
| GSM4626770_CGACCTTGTCGAACAG-1  | GSM4626770 | OA |
| GSM4626770_CGACCTTGTTTCGCTC-1  | GSM4626770 | OA |
| GSM4626770_CGACCTTCCACGACG-1   | GSM4626770 | OA |
| GSM4626770_CGACTTCAGGCTAGAC-1  | GSM4626770 | OA |
| GSM4626770_CGACTTCAGGGATCTG-1  | GSM4626770 | OA |
| GSM4626770_CGACTTCCATCACGAT-1  | GSM4626770 | OA |
| GSM4626770_CGACTTCGTACCTACA-1  | GSM4626770 | OA |
| GSM4626770_CGACTTCGTCTCCCTA-1  | GSM4626770 | OA |
| GSM4626770_CGACTTCGTTCCACGG-1  | GSM4626770 | OA |
| GSM4626770_CGACTTCGTTGCCTCT-1  | GSM4626770 | OA |
| GSM4626770_CGACTTCTCTAACTTC-1  | GSM4626770 | OA |
| GSM4626770_CGACTTCTCTGTCCGT-1  | GSM4626770 | OA |
| GSM4626770_CGAGAAGAGAAACGCC-1  | GSM4626770 | OA |
| GSM4626770_CGAGAAGCACAGACTT-1  | GSM4626770 | OA |
| GSM4626770_CGAGAAGGTCATACTG-1  | GSM4626770 | OA |
| GSM4626770_CGAGAAGGTCTGCAAT-1  | GSM4626770 | OA |
| GSM4626770_CGAGAAGGTTTCATGGT-1 | GSM4626770 | OA |
| GSM4626770_CGAGAAGGTTGGTAAA-1  | GSM4626770 | OA |
| GSM4626770_CGAGAAGTCGCATGAT-1  | GSM4626770 | OA |
| GSM4626770_CGAGAAGTCGGTGTTA-1  | GSM4626770 | OA |
| GSM4626770_CGAGAAGTCTGCCCTA-1  | GSM4626770 | OA |
| GSM4626770_CGAGCACAGCTGATAA-1  | GSM4626770 | OA |
| GSM4626770_CGAGCACGTACATGTC-1  | GSM4626770 | OA |
| GSM4626770_CGAGCACGTGAGCGAT-1  | GSM4626770 | OA |
| GSM4626770_CGAGCACTCGATCCCT-1  | GSM4626770 | OA |
| GSM4626770_CGAGCCAAGTACGCC-1   | GSM4626770 | OA |
| GSM4626770_CGAGCCAAGTGAGAA-1   | GSM4626770 | OA |
| GSM4626770_CGAGCCACAAGACACG-1  | GSM4626770 | OA |
| GSM4626770_CGAGCCACACGGTGTC-1  | GSM4626770 | OA |
| GSM4626770_CGAGCCACACTTCTGC-1  | GSM4626770 | OA |
| GSM4626770_CGAGCCAGTGACTCAT-1  | GSM4626770 | OA |
| GSM4626770_CGAGCCATCAGTGTTG-1  | GSM4626770 | OA |
| GSM4626770_CGATCGGAGAAGATTC-1  | GSM4626770 | OA |
| GSM4626770_CGATCGGAGCAGATCG-1  | GSM4626770 | OA |
| GSM4626770_CGATCGGAGGAACTGC-1  | GSM4626770 | OA |
| GSM4626770_CGATCGGAGTTAACGA-1  | GSM4626770 | OA |
| GSM4626770_CGATGGCAGCGTAGTG-1  | GSM4626770 | OA |
| GSM4626770_CGATGGCAGCGTTCCG-1  | GSM4626770 | OA |
| GSM4626770_CGATGGCCAATGTAAG-1  | GSM4626770 | OA |
| GSM4626770_CGATGGCCACAGCCCA-1  | GSM4626770 | OA |

|                                |            |    |
|--------------------------------|------------|----|
| GSM4626770_CGATGGCGTAGCTTGT-1  | GSM4626770 | OA |
| GSM4626770_CGATGGCTCACGATGT-1  | GSM4626770 | OA |
| GSM4626770_CGATGGCTCAGGTA-1    | GSM4626770 | OA |
| GSM4626770_CGATGGCTCCAGGGCT-1  | GSM4626770 | OA |
| GSM4626770_CGATGTAGTAAACCTC-1  | GSM4626770 | OA |
| GSM4626770_CGATGTAGTAGCTCCG-1  | GSM4626770 | OA |
| GSM4626770_CGATGTATCTTCGAGA-1  | GSM4626770 | OA |
| GSM4626770_CGATTGAAGTGGAGTC-1  | GSM4626770 | OA |
| GSM4626770_CGATTGATCTCTTGAT-1  | GSM4626770 | OA |
| GSM4626770_CGCCAAGAGCAACGGT-1  | GSM4626770 | OA |
| GSM4626770_CGCCAAGGTTGTCGCG-1  | GSM4626770 | OA |
| GSM4626770_CGCCAAGTCAACCAAC-1  | GSM4626770 | OA |
| GSM4626770_CGCGGTAAGTCACGCC-1  | GSM4626770 | OA |
| GSM4626770_CGCGGTACAGATGGCA-1  | GSM4626770 | OA |
| GSM4626770_CGCGGTAGTTCGGCAC-1  | GSM4626770 | OA |
| GSM4626770_CGCGGTATCACTATTC-1  | GSM4626770 | OA |
| GSM4626770_CGCGGTATCACTTACT-1  | GSM4626770 | OA |
| GSM4626770_CGCGTTTACAGAGGCT-1  | GSM4626770 | OA |
| GSM4626770_CGCGTTTACACATAAC-1  | GSM4626770 | OA |
| GSM4626770_CGCGTTTACACTACAA-1  | GSM4626770 | OA |
| GSM4626770_CGCGTTTCAACGATGG-1  | GSM4626770 | OA |
| GSM4626770_CGCGTTTCAACTGGCC-1  | GSM4626770 | OA |
| GSM4626770_CGCGTTTCAATGAATG-1  | GSM4626770 | OA |
| GSM4626770_CGCGTTTGTACTTAGC-1  | GSM4626770 | OA |
| GSM4626770_CGCGTTTGTACTTGAC-1  | GSM4626770 | OA |
| GSM4626770_CGCGTTTGTTCAGCGC-1  | GSM4626770 | OA |
| GSM4626770_CGCGTTTTCTACAGA-1   | GSM4626770 | OA |
| GSM4626770_CGCTGGAAGTTGTAGA-1  | GSM4626770 | OA |
| GSM4626770_CGCTGGACACACGCTG-1  | GSM4626770 | OA |
| GSM4626770_CGCTGGACACGGACAA-1  | GSM4626770 | OA |
| GSM4626770_CGCTGGACATCACAAC-1  | GSM4626770 | OA |
| GSM4626770_CGCTGGAGTCACCCAG-1  | GSM4626770 | OA |
| GSM4626770_CGCTTCAAGTGCTGCC-1  | GSM4626770 | OA |
| GSM4626770_CGCTTCAGTCTCCACT-1  | GSM4626770 | OA |
| GSM4626770_CGCTTCAGTGACTACT-1  | GSM4626770 | OA |
| GSM4626770_CGCTTCATCATGCAAC-1  | GSM4626770 | OA |
| GSM4626770_CGGACACCAGCTATTG-1  | GSM4626770 | OA |
| GSM4626770_CGGACACCAGTTTACG-1  | GSM4626770 | OA |
| GSM4626770_CGGACACGTACCGGCT-1  | GSM4626770 | OA |
| GSM4626770_CGGACACGTTCGATCG-1  | GSM4626770 | OA |
| GSM4626770_CGGACACGTGCAACTT-1  | GSM4626770 | OA |
| GSM4626770_CGGACACTCGTCGTTT-1  | GSM4626770 | OA |
| GSM4626770_CGGACACTCTGTCCGT-1  | GSM4626770 | OA |
| GSM4626770_CGGACGTAGCGCTTAT-1  | GSM4626770 | OA |
| GSM4626770_CGGACGTCAAACGTCT-1  | GSM4626770 | OA |
| GSM4626770_CGGACGTACATAACC-1   | GSM4626770 | OA |
| GSM4626770_CGGACGTACAGTCCAT-1  | GSM4626770 | OA |
| GSM4626770_CGGACGTACAGTCAGAG-1 | GSM4626770 | OA |
| GSM4626770_CGGACGTACATGTCCTC-1 | GSM4626770 | OA |
| GSM4626770_CGGACGTGTCCGAGTC-1  | GSM4626770 | OA |
| GSM4626770_CGGACGTGTTCTCATT-1  | GSM4626770 | OA |
| GSM4626770_CGGACGTTACCCTCA-1   | GSM4626770 | OA |
| GSM4626770_CGGACGTTCCATGCTC-1  | GSM4626770 | OA |
| GSM4626770_CGGACGTTCCGGCACA-1  | GSM4626770 | OA |
| GSM4626770_CGGACTGAGCCACGTC-1  | GSM4626770 | OA |
| GSM4626770_CGGACTGAGTACGTAA-1  | GSM4626770 | OA |
| GSM4626770_CGGACTGCAACACGCC-1  | GSM4626770 | OA |

|                                |            |    |
|--------------------------------|------------|----|
| GSM4626770_CGGACTGCACGAGAGT-1  | GSM4626770 | OA |
| GSM4626770_CGGACTGCATCAGTCA-1  | GSM4626770 | OA |
| GSM4626770_CGGACTGGTTCGAACAG-1 | GSM4626770 | OA |
| GSM4626770_CGGACTGTCTTGTCAT-1  | GSM4626770 | OA |
| GSM4626770_CGGAGCTAGGGTGTGG-1  | GSM4626770 | OA |
| GSM4626770_CGGAGCTCAACACCCG-1  | GSM4626770 | OA |
| GSM4626770_CGGAGCTCAGTGACAG-1  | GSM4626770 | OA |
| GSM4626770_CGGAGCTGTAGCTGCC-1  | GSM4626770 | OA |
| GSM4626770_CGGAGCTGTTACGACT-1  | GSM4626770 | OA |
| GSM4626770_CGGAGCTGTTCCGGCA-1  | GSM4626770 | OA |
| GSM4626770_CGGAGCTTCGAGGTAG-1  | GSM4626770 | OA |
| GSM4626770_CGGAGCTTCGCACTCT-1  | GSM4626770 | OA |
| GSM4626770_CGGAGCTTCTTTACGT-1  | GSM4626770 | OA |
| GSM4626770_CGGAGTCAGAGGACGG-1  | GSM4626770 | OA |
| GSM4626770_CGGAGTCGTACCCAAT-1  | GSM4626770 | OA |
| GSM4626770_CGGAGTCGTGCTTCT-1   | GSM4626770 | OA |
| GSM4626770_CGGAGTCGTGTGGTTT-1  | GSM4626770 | OA |
| GSM4626770_CGGAGTCGTTACAGAA-1  | GSM4626770 | OA |
| GSM4626770_CGGAGTCTCAACCAAC-1  | GSM4626770 | OA |
| GSM4626770_CGGAGTCTCCATGCTC-1  | GSM4626770 | OA |
| GSM4626770_CGGAGTCTCGAATGGG-1  | GSM4626770 | OA |
| GSM4626770_CGGCTAGCAATGTAAG-1  | GSM4626770 | OA |
| GSM4626770_CGGCTAGCAGGTGCCT-1  | GSM4626770 | OA |
| GSM4626770_CGGCTAGCAGTCCTTC-1  | GSM4626770 | OA |
| GSM4626770_CGGCTAGGTGCGGTAA-1  | GSM4626770 | OA |
| GSM4626770_CGGCTAGGTTATCACG-1  | GSM4626770 | OA |
| GSM4626770_CGGCTAGTCTTGCAAG-1  | GSM4626770 | OA |
| GSM4626770_CGGGTCAAGTTCGCAT-1  | GSM4626770 | OA |
| GSM4626770_CGGGTACAGCTCGAC-1   | GSM4626770 | OA |
| GSM4626770_CGGGTACAGGGATTG-1   | GSM4626770 | OA |
| GSM4626770_CGGGTACAGTAATCACC-1 | GSM4626770 | OA |
| GSM4626770_CGGGTACAGTACAGTGG-1 | GSM4626770 | OA |
| GSM4626770_CGGGTACAGTATTCTCT-1 | GSM4626770 | OA |
| GSM4626770_CGGGTACATCACAGTAC-1 | GSM4626770 | OA |
| GSM4626770_CGGGTACATCCGTCATC-1 | GSM4626770 | OA |
| GSM4626770_CGGGTACATCGCCAGCA-1 | GSM4626770 | OA |
| GSM4626770_CGGGTACATCTCATTCA-1 | GSM4626770 | OA |
| GSM4626770_CGGTTAACACGACGAA-1  | GSM4626770 | OA |
| GSM4626770_CGGTTAACAGAGTGTG-1  | GSM4626770 | OA |
| GSM4626770_CGGTTAAGTACAAGTA-1  | GSM4626770 | OA |
| GSM4626770_CGGTTAAGTTACTGAC-1  | GSM4626770 | OA |
| GSM4626770_CGGTTAATCTACGAGT-1  | GSM4626770 | OA |
| GSM4626770_CGTAGCGAGGGTGTGG-1  | GSM4626770 | OA |
| GSM4626770_CGTAGCGCACAGGCCT-1  | GSM4626770 | OA |
| GSM4626770_CGTAGCGCACTAGTAC-1  | GSM4626770 | OA |
| GSM4626770_CGTAGCGCATATGAGA-1  | GSM4626770 | OA |
| GSM4626770_CGTAGCGGTCAAAGAT-1  | GSM4626770 | OA |
| GSM4626770_CGTAGCGGTCCTCTTG-1  | GSM4626770 | OA |
| GSM4626770_CGTAGCGTCCAAAGTC-1  | GSM4626770 | OA |
| GSM4626770_CGTAGCGTCCTTGGTC-1  | GSM4626770 | OA |
| GSM4626770_CGTAGGCTCAGCATGT-1  | GSM4626770 | OA |
| GSM4626770_CGTAGGCTCTATCCTA-1  | GSM4626770 | OA |
| GSM4626770_CGTAGGCTCTCAACTT-1  | GSM4626770 | OA |
| GSM4626770_CGTCACTAGCCAGAAC-1  | GSM4626770 | OA |
| GSM4626770_CGTCACTACCCTATC-1   | GSM4626770 | OA |
| GSM4626770_CGTCACTGTACTCAAC-1  | GSM4626770 | OA |
| GSM4626770_CGTCACTGTAGTGAAT-1  | GSM4626770 | OA |

|                               |            |    |
|-------------------------------|------------|----|
| GSM4626770_CGTCACTGTCTCATCC-1 | GSM4626770 | OA |
| GSM4626770_CGTCACTTCAATAAGG-1 | GSM4626770 | OA |
| GSM4626770_CGTCACTTCATTTGGG-1 | GSM4626770 | OA |
| GSM4626770_CGTCACTTCTAGCACA-1 | GSM4626770 | OA |
| GSM4626770_CGTCAGGAGATGCCTT-1 | GSM4626770 | OA |
| GSM4626770_CGTCAGGCAGGTCCAC-1 | GSM4626770 | OA |
| GSM4626770_CGTCAGGGTGCGAAAC-1 | GSM4626770 | OA |
| GSM4626770_CGTCAGGTCAGCCTAA-1 | GSM4626770 | OA |
| GSM4626770_CGTCAGGTCAGTGCAT-1 | GSM4626770 | OA |
| GSM4626770_CGTCCATAGAGCAATT-1 | GSM4626770 | OA |
| GSM4626770_CGTCCATAGAGGTAGA-1 | GSM4626770 | OA |
| GSM4626770_CGTCCATAGAGGTTGC-1 | GSM4626770 | OA |
| GSM4626770_CGTCCATAGCTCCCAG-1 | GSM4626770 | OA |
| GSM4626770_CGTCCATAGGAGCGAG-1 | GSM4626770 | OA |
| GSM4626770_CGTCCATAGGCCATAG-1 | GSM4626770 | OA |
| GSM4626770_CGTCCATAGTAGATGT-1 | GSM4626770 | OA |
| GSM4626770_CGTCCATCACGCTTTC-1 | GSM4626770 | OA |
| GSM4626770_CGTCCATGTACAGACG-1 | GSM4626770 | OA |
| GSM4626770_CGTCCATTCTCAACC-1  | GSM4626770 | OA |
| GSM4626770_CGTCCATTCTCAAGTG-1 | GSM4626770 | OA |
| GSM4626770_CGTCTACAGCAGGTCA-1 | GSM4626770 | OA |
| GSM4626770_CGTCTACAGGGTCGAT-1 | GSM4626770 | OA |
| GSM4626770_CGTCTACAGTGGGTTG-1 | GSM4626770 | OA |
| GSM4626770_CGTCTACCAATAAGCA-1 | GSM4626770 | OA |
| GSM4626770_CGTCTACCATGCATGT-1 | GSM4626770 | OA |
| GSM4626770_CGTCTACTCGAACGGA-1 | GSM4626770 | OA |
| GSM4626770_CGTGAGCAGCTGAAAT-1 | GSM4626770 | OA |
| GSM4626770_CGTGAGCAGGATATAC-1 | GSM4626770 | OA |
| GSM4626770_CGTGAGCGTCTTTAT-1  | GSM4626770 | OA |
| GSM4626770_CGTGAGCTCGTTACGA-1 | GSM4626770 | OA |
| GSM4626770_CGTGTAACAAAGCGGT-1 | GSM4626770 | OA |
| GSM4626770_CGTGTAACAGTTAACC-1 | GSM4626770 | OA |
| GSM4626770_CGTGTAACATCCTTGC-1 | GSM4626770 | OA |
| GSM4626770_CGTGTAATCAGATAAG-1 | GSM4626770 | OA |
| GSM4626770_CGTGTAATCCAGTAGT-1 | GSM4626770 | OA |
| GSM4626770_CGTGTAATCGTACGGC-1 | GSM4626770 | OA |
| GSM4626770_CGTGTCTAGAGCCTAG-1 | GSM4626770 | OA |
| GSM4626770_CGTGTCTCATCGATGT-1 | GSM4626770 | OA |
| GSM4626770_CGTGTCTGTACCGGCT-1 | GSM4626770 | OA |
| GSM4626770_CGTGTCTGTAGGAGTC-1 | GSM4626770 | OA |
| GSM4626770_CGTGTCTGTCTCACCT-1 | GSM4626770 | OA |
| GSM4626770_CGTGTCTGTGAGGGAG-1 | GSM4626770 | OA |
| GSM4626770_CGTGTCTGTGATGTGG-1 | GSM4626770 | OA |
| GSM4626770_CGTGTCTTACCAGGC-1  | GSM4626770 | OA |
| GSM4626770_CGTGTCTTCCGTCATC-1 | GSM4626770 | OA |
| GSM4626770_CGTGTCTTCGCGCCAA-1 | GSM4626770 | OA |
| GSM4626770_CGTTAGAAGGAGCGTT-1 | GSM4626770 | OA |
| GSM4626770_CGTTAGACAACACCTA-1 | GSM4626770 | OA |
| GSM4626770_CGTTAGACATACAGCT-1 | GSM4626770 | OA |
| GSM4626770_CGTTAGACATGTCGAT-1 | GSM4626770 | OA |
| GSM4626770_CGTTCTGAGTAACCTT-1 | GSM4626770 | OA |
| GSM4626770_CGTTCTGAGTCGTAAC-1 | GSM4626770 | OA |
| GSM4626770_CGTTCTGTCTTCGAGA-1 | GSM4626770 | OA |
| GSM4626770_CGTTGGGAGATGGCGT-1 | GSM4626770 | OA |
| GSM4626770_CGTTGGGAGCCCAATT-1 | GSM4626770 | OA |
| GSM4626770_CGTTGGGAGCGATAGC-1 | GSM4626770 | OA |
| GSM4626770_CGTTGGGAGTGTCTCA-1 | GSM4626770 | OA |



|                                |            |    |
|--------------------------------|------------|----|
| GSM4626770_CGTTGGGCATTACCTT-1  | GSM4626770 | OA |
| GSM4626770_CTAACCTAGAAGTGT-1   | GSM4626770 | OA |
| GSM4626770_CTAACCTAGACTAGGC-1  | GSM4626770 | OA |
| GSM4626770_CTAACCTCAATAGCAA-1  | GSM4626770 | OA |
| GSM4626770_CTAACCTCACATTCTGA-1 | GSM4626770 | OA |
| GSM4626770_CTAACCTGTGGCCCTA-1  | GSM4626770 | OA |
| GSM4626770_CTAACCTTCCACCGGT-1  | GSM4626770 | OA |
| GSM4626770_CTAACCTTCACTTACT-1  | GSM4626770 | OA |
| GSM4626770_CTAACCTTCCAGGGCT-1  | GSM4626770 | OA |
| GSM4626770_CTAACCTTCCGAATGT-1  | GSM4626770 | OA |
| GSM4626770_CTAACCTTCTGTTGAG-1  | GSM4626770 | OA |
| GSM4626770_CTAAGACAGAATGTGT-1  | GSM4626770 | OA |
| GSM4626770_CTAAGACAGACCTTTG-1  | GSM4626770 | OA |
| GSM4626770_CTAAGACAGCCACGTC-1  | GSM4626770 | OA |
| GSM4626770_CTAAGACAGCGTAGTG-1  | GSM4626770 | OA |
| GSM4626770_CTAAGACAGGACATTA-1  | GSM4626770 | OA |
| GSM4626770_CTAAGACAGTCTCGGC-1  | GSM4626770 | OA |
| GSM4626770_CTAAGACCATAGACTC-1  | GSM4626770 | OA |
| GSM4626770_CTAAGACCATGTGCGAT-1 | GSM4626770 | OA |
| GSM4626770_CTAAGACGTGAGTTT-1   | GSM4626770 | OA |
| GSM4626770_CTAAGACTCGGCCGAT-1  | GSM4626770 | OA |
| GSM4626770_CTAATGGAGGGTATCG-1  | GSM4626770 | OA |
| GSM4626770_CTAATGGTCATGGTCA-1  | GSM4626770 | OA |
| GSM4626770_CTAATGGTCGGTTAAC-1  | GSM4626770 | OA |
| GSM4626770_CTAATGGTCTCATTCA-1  | GSM4626770 | OA |
| GSM4626770_CTACACCAGTGTTAGA-1  | GSM4626770 | OA |
| GSM4626770_CTACACCCACAGACAG-1  | GSM4626770 | OA |
| GSM4626770_CTACACCCACGGTGTC-1  | GSM4626770 | OA |
| GSM4626770_CTACACCGTCATGCCG-1  | GSM4626770 | OA |
| GSM4626770_CTACACCGTGCCCTA-1   | GSM4626770 | OA |
| GSM4626770_CTACACCTCACAAACC-1  | GSM4626770 | OA |
| GSM4626770_CTACATTCAAACAACA-1  | GSM4626770 | OA |
| GSM4626770_CTACATTACAGACAG-1   | GSM4626770 | OA |
| GSM4626770_CTACATTCTCTCGCT-1   | GSM4626770 | OA |
| GSM4626770_CTACATTTCTGTACC-1   | GSM4626770 | OA |
| GSM4626770_CTACCCAAGACAGGCT-1  | GSM4626770 | OA |
| GSM4626770_CTACCCAAGCTGAACG-1  | GSM4626770 | OA |
| GSM4626770_CTACCCAAGTCATGCT-1  | GSM4626770 | OA |
| GSM4626770_CTACCCACAAAGCGGT-1  | GSM4626770 | OA |
| GSM4626770_CTACCCACAAGTAGTA-1  | GSM4626770 | OA |
| GSM4626770_CTACCCACACTGAAGG-1  | GSM4626770 | OA |
| GSM4626770_CTACCCAGTTCAGTAC-1  | GSM4626770 | OA |
| GSM4626770_CTACCCATCAGCTCTC-1  | GSM4626770 | OA |
| GSM4626770_CTACCCATCATAACCG-1  | GSM4626770 | OA |
| GSM4626770_CTACCCATCATGTCTT-1  | GSM4626770 | OA |
| GSM4626770_CTACGTCAGACCACGA-1  | GSM4626770 | OA |
| GSM4626770_CTACGTCAGGCGCTCT-1  | GSM4626770 | OA |
| GSM4626770_CTACGTCAGTGTCCCG-1  | GSM4626770 | OA |
| GSM4626770_CTACGTCCAAAGAATC-1  | GSM4626770 | OA |
| GSM4626770_CTACGTCCATCTCCA-1   | GSM4626770 | OA |
| GSM4626770_CTACGTCTCAACACAC-1  | GSM4626770 | OA |
| GSM4626770_CTAGAGTAGGGTATCG-1  | GSM4626770 | OA |
| GSM4626770_CTAGAGTAGTCGCCGT-1  | GSM4626770 | OA |
| GSM4626770_CTAGAGTCACGACGAA-1  | GSM4626770 | OA |
| GSM4626770_CTAGAGTCAGCTGCTG-1  | GSM4626770 | OA |
| GSM4626770_CTAGAGTCAGTTAACC-1  | GSM4626770 | OA |
| GSM4626770_CTAGAGTGTAGAGTGC-1  | GSM4626770 | OA |

|                                |            |    |
|--------------------------------|------------|----|
| GSM4626770_CTAGAGTTCCCACTTG-1  | GSM4626770 | OA |
| GSM4626770_CTAGCCTCAATAGAGT-1  | GSM4626770 | OA |
| GSM4626770_CTAGCCTCATTGCGGC-1  | GSM4626770 | OA |
| GSM4626770_CTAGCCTGTTCTGTCTC-1 | GSM4626770 | OA |
| GSM4626770_CTAGCCTGTTTGTGG-1   | GSM4626770 | OA |
| GSM4626770_CTAGTGAAGCTTTGGT-1  | GSM4626770 | OA |
| GSM4626770_CTAGTGACACCTCGTT-1  | GSM4626770 | OA |
| GSM4626770_CTAGTGAGTAGTGAAT-1  | GSM4626770 | OA |
| GSM4626770_CTAGTGAGTGCACGAA-1  | GSM4626770 | OA |
| GSM4626770_CTAGTGATCAATCTCT-1  | GSM4626770 | OA |
| GSM4626770_CTAGTGATCACCGGGT-1  | GSM4626770 | OA |
| GSM4626770_CTAGTGATCAGCTCTC-1  | GSM4626770 | OA |
| GSM4626770_CTCACACGTAGCGTCC-1  | GSM4626770 | OA |
| GSM4626770_CTCACACGTATTCGTG-1  | GSM4626770 | OA |
| GSM4626770_CTCACACGTGCCTGGT-1  | GSM4626770 | OA |
| GSM4626770_CTCACACGTTGGTTTG-1  | GSM4626770 | OA |
| GSM4626770_CTCACACTCACCTCA-1   | GSM4626770 | OA |
| GSM4626770_CTCAGAAAGGGTATCG-1  | GSM4626770 | OA |
| GSM4626770_CTCAGAAAGGTTCTTA-1  | GSM4626770 | OA |
| GSM4626770_CTCAGAACAGTGGAGT-1  | GSM4626770 | OA |
| GSM4626770_CTCAGAAAGTACAAGTA-1 | GSM4626770 | OA |
| GSM4626770_CTCAGAAATCACCTCA-1  | GSM4626770 | OA |
| GSM4626770_CTCAGAAATCATCGGAT-1 | GSM4626770 | OA |
| GSM4626770_CTCAGAAATCATGCATG-1 | GSM4626770 | OA |
| GSM4626770_CTCATTAAGAACTGTA-1  | GSM4626770 | OA |
| GSM4626770_CTCATTAGTCCGCTGA-1  | GSM4626770 | OA |
| GSM4626770_CTCATTATCACCTCGT-1  | GSM4626770 | OA |
| GSM4626770_CTCCTAGAGACCACGA-1  | GSM4626770 | OA |
| GSM4626770_CTCCTAGAGAGTACCG-1  | GSM4626770 | OA |
| GSM4626770_CTCCTAGCATCCCACT-1  | GSM4626770 | OA |
| GSM4626770_CTCCTAGCATGCTAGT-1  | GSM4626770 | OA |
| GSM4626770_CTCCTAGGTCGAGTTT-1  | GSM4626770 | OA |
| GSM4626770_CTCCTAGTCTGTCCGT-1  | GSM4626770 | OA |
| GSM4626770_CTCGAAAAGCAGCCTC-1  | GSM4626770 | OA |
| GSM4626770_CTCGAAAAGTATCTCG-1  | GSM4626770 | OA |
| GSM4626770_CTCGAAAAGTACAAGTA-1 | GSM4626770 | OA |
| GSM4626770_CTCGAAAAGTCCAGTTA-1 | GSM4626770 | OA |
| GSM4626770_CTCGAAAAGTCCCGACA-1 | GSM4626770 | OA |
| GSM4626770_CTCGAAAAGTCTCCATC-1 | GSM4626770 | OA |
| GSM4626770_CTCGAAAAGTGCCTGTG-1 | GSM4626770 | OA |
| GSM4626770_CTCGAAAAGTTTAAGCC-1 | GSM4626770 | OA |
| GSM4626770_CTCGAAATCATGTCTT-1  | GSM4626770 | OA |
| GSM4626770_CTCGAAATCATTCACT-1  | GSM4626770 | OA |
| GSM4626770_CTCGAGGCACCTGGTG-1  | GSM4626770 | OA |
| GSM4626770_CTCGAGGCATCCGTGG-1  | GSM4626770 | OA |
| GSM4626770_CTCGAGGGTCTCCCTA-1  | GSM4626770 | OA |
| GSM4626770_CTCGAGGGTTCGTCTC-1  | GSM4626770 | OA |
| GSM4626770_CTCGAGGGTTGTTTG-1   | GSM4626770 | OA |
| GSM4626770_CTCGAGGGTTTAGGAA-1  | GSM4626770 | OA |
| GSM4626770_CTCGAGGTCATCGATG-1  | GSM4626770 | OA |
| GSM4626770_CTCGAGGTCGAATGGG-1  | GSM4626770 | OA |
| GSM4626770_CTCGGAGCAGGACCCT-1  | GSM4626770 | OA |
| GSM4626770_CTCGGAGGTTTGACAC-1  | GSM4626770 | OA |
| GSM4626770_CTCGGGAAGAGCTATA-1  | GSM4626770 | OA |
| GSM4626770_CTCGGGAGTGGCCCTA-1  | GSM4626770 | OA |
| GSM4626770_CTCGGGATCCTGCCAT-1  | GSM4626770 | OA |
| GSM4626770_CTCGGGATCGCTGATA-1  | GSM4626770 | OA |

|                                |            |    |
|--------------------------------|------------|----|
| GSM4626770_CTCGGGATCTAACGGT-1  | GSM4626770 | OA |
| GSM4626770_CTCGTACAGAGGTTGC-1  | GSM4626770 | OA |
| GSM4626770_CTCGTACGTAAATGAC-1  | GSM4626770 | OA |
| GSM4626770_CTCGTACGTAGAAGGA-1  | GSM4626770 | OA |
| GSM4626770_CTCGTACGTCTTCAAG-1  | GSM4626770 | OA |
| GSM4626770_CTCGTACTCCCTGACT-1  | GSM4626770 | OA |
| GSM4626770_CTCGTCAAGGCCGAAT-1  | GSM4626770 | OA |
| GSM4626770_CTCGTCAAGTGTTGAA-1  | GSM4626770 | OA |
| GSM4626770_CTCGTCAGTTACAGAA-1  | GSM4626770 | OA |
| GSM4626770_CTCGTCATCCTTAATC-1  | GSM4626770 | OA |
| GSM4626770_CTCTAATAGACAGGCT-1  | GSM4626770 | OA |
| GSM4626770_CTCTAATAGGGATGGG-1  | GSM4626770 | OA |
| GSM4626770_CTCTAATCATAGTAAG-1  | GSM4626770 | OA |
| GSM4626770_CTCTAATCATCCGCGA-1  | GSM4626770 | OA |
| GSM4626770_CTCTAATGTGAGGGTT-1  | GSM4626770 | OA |
| GSM4626770_CTCTAATTCAAAGACA-1  | GSM4626770 | OA |
| GSM4626770_CTCTAATTCGCCGTGA-1  | GSM4626770 | OA |
| GSM4626770_CTCTAATTCGTTACGA-1  | GSM4626770 | OA |
| GSM4626770_CTCTACGAGCGCTTAT-1  | GSM4626770 | OA |
| GSM4626770_CTCTACGAGCGTCTAT-1  | GSM4626770 | OA |
| GSM4626770_CTCTACGAGCTTCGCG-1  | GSM4626770 | OA |
| GSM4626770_CTCTACGCATAGACTC-1  | GSM4626770 | OA |
| GSM4626770_CTCTACGCATTTGCTT-1  | GSM4626770 | OA |
| GSM4626770_CTCTACGGTAAAGTCA-1  | GSM4626770 | OA |
| GSM4626770_CTCTACGGTAGCTAAA-1  | GSM4626770 | OA |
| GSM4626770_CTCTACGGTATAGGGC-1  | GSM4626770 | OA |
| GSM4626770_CTCTACGGTCCGTCAG-1  | GSM4626770 | OA |
| GSM4626770_CTCTACGGTGTGGTTT-1  | GSM4626770 | OA |
| GSM4626770_CTCTACGGTGTTCGAT-1  | GSM4626770 | OA |
| GSM4626770_CTCTACGTCTAACTTC-1  | GSM4626770 | OA |
| GSM4626770_CTCTGGTAGACACGAC-1  | GSM4626770 | OA |
| GSM4626770_CTCTGGTCAACACGCC-1  | GSM4626770 | OA |
| GSM4626770_CTCTGGTCAACAGGTTT-1 | GSM4626770 | OA |
| GSM4626770_CTCTGGTCATAGTAAG-1  | GSM4626770 | OA |
| GSM4626770_CTCTGGTGTAAGTGTA-1  | GSM4626770 | OA |
| GSM4626770_CTCTGGTGTCACCCAG-1  | GSM4626770 | OA |
| GSM4626770_CTCTGGTGTTTAGGAA-1  | GSM4626770 | OA |
| GSM4626770_CTCTGGTTCGGTCCGA-1  | GSM4626770 | OA |
| GSM4626770_CTGAAACAGTTCCACA-1  | GSM4626770 | OA |
| GSM4626770_CTGAAACCATGCATGT-1  | GSM4626770 | OA |
| GSM4626770_CTGAAACGTTGCCTCT-1  | GSM4626770 | OA |
| GSM4626770_CTGAAACTCATCGGAT-1  | GSM4626770 | OA |
| GSM4626770_CTGAAGTAGGAGTACC-1  | GSM4626770 | OA |
| GSM4626770_CTGAAGTAGGCCGAAT-1  | GSM4626770 | OA |
| GSM4626770_CTGAAGTCAGCTGTGC-1  | GSM4626770 | OA |
| GSM4626770_CTGAAGTGTCATGCAT-1  | GSM4626770 | OA |
| GSM4626770_CTGAAGTTCGAGCCCA-1  | GSM4626770 | OA |
| GSM4626770_CTGATAGAGTCAATAG-1  | GSM4626770 | OA |
| GSM4626770_CTGATAGCACAGATTC-1  | GSM4626770 | OA |
| GSM4626770_CTGATAGCAGGGAGAG-1  | GSM4626770 | OA |
| GSM4626770_CTGATAGCATGTTCCC-1  | GSM4626770 | OA |
| GSM4626770_CTGATAGGTCACACGC-1  | GSM4626770 | OA |
| GSM4626770_CTGATAGGTCATATCG-1  | GSM4626770 | OA |
| GSM4626770_CTGATAGGTCCGAATT-1  | GSM4626770 | OA |
| GSM4626770_CTGATAGGTCTGCAAT-1  | GSM4626770 | OA |
| GSM4626770_CTGATAGGTGTTTGGT-1  | GSM4626770 | OA |
| GSM4626770_CTGATAGTCAAGCCTA-1  | GSM4626770 | OA |

|                                |            |    |
|--------------------------------|------------|----|
| GSM4626770_CTGATCCAGACTAGAT-1  | GSM4626770 | OA |
| GSM4626770_CTGATCCAGGACAGAA-1  | GSM4626770 | OA |
| GSM4626770_CTGATCCAGTCGAGTG-1  | GSM4626770 | OA |
| GSM4626770_CTGATCCAGTTGAGAT-1  | GSM4626770 | OA |
| GSM4626770_CTGATCCCAAGTAATG-1  | GSM4626770 | OA |
| GSM4626770_CTGATCCCATTAGGCT-1  | GSM4626770 | OA |
| GSM4626770_CTGATCCGTGGTGTAG-1  | GSM4626770 | OA |
| GSM4626770_CTGATCCTCAGTGTTG-1  | GSM4626770 | OA |
| GSM4626770_CTGATCCTCTAGAGTC-1  | GSM4626770 | OA |
| GSM4626770_CTGCCTAAGAATTCCC-1  | GSM4626770 | OA |
| GSM4626770_CTGCCTAAGATGCGAC-1  | GSM4626770 | OA |
| GSM4626770_CTGCCTACATCGGACC-1  | GSM4626770 | OA |
| GSM4626770_CTGCCTAGTCAACATC-1  | GSM4626770 | OA |
| GSM4626770_CTGCCTAGTGCGGTA-1   | GSM4626770 | OA |
| GSM4626770_CTGCCTAGTGTGCGTC-1  | GSM4626770 | OA |
| GSM4626770_CTGCCTAGTGTTGAGG-1  | GSM4626770 | OA |
| GSM4626770_CTGCGGAAGAAACGCC-1  | GSM4626770 | OA |
| GSM4626770_CTGCGGACACATGTGT-1  | GSM4626770 | OA |
| GSM4626770_CTGCGGACACCCAGTG-1  | GSM4626770 | OA |
| GSM4626770_CTGCGGACAGTCAGCC-1  | GSM4626770 | OA |
| GSM4626770_CTGCGGACATAAAGGT-1  | GSM4626770 | OA |
| GSM4626770_CTGCGGACATTGACA-1   | GSM4626770 | OA |
| GSM4626770_CTGCGGATCCATGAAC-1  | GSM4626770 | OA |
| GSM4626770_CTGCTGTAGTGACTCT-1  | GSM4626770 | OA |
| GSM4626770_CTGCTGTCAAGGTGTG-1  | GSM4626770 | OA |
| GSM4626770_CTGCTGTTCATGGGACA-1 | GSM4626770 | OA |
| GSM4626770_CTGCTGTGTAATAGCA-1  | GSM4626770 | OA |
| GSM4626770_CTGCTGTGTATCACCA-1  | GSM4626770 | OA |
| GSM4626770_CTGCTGTTCTATGTT-1   | GSM4626770 | OA |
| GSM4626770_CTGCTGTTCTATTCA-1   | GSM4626770 | OA |
| GSM4626770_CTGCTGTTCTACCTGC-1  | GSM4626770 | OA |
| GSM4626770_CTGGTCTCAGAGTGTG-1  | GSM4626770 | OA |
| GSM4626770_CTGGTCTGTTCATATGC-1 | GSM4626770 | OA |
| GSM4626770_CTGGTCTGTCTTTCAT-1  | GSM4626770 | OA |
| GSM4626770_CTGGTCTGTTAAGAAC-1  | GSM4626770 | OA |
| GSM4626770_CTGTGCTAGCCCGAAA-1  | GSM4626770 | OA |
| GSM4626770_CTGTGCTAGCCGGTAA-1  | GSM4626770 | OA |
| GSM4626770_CTGTGCTAGGCCCTCA-1  | GSM4626770 | OA |
| GSM4626770_CTGTGCTAGTGAAGAG-1  | GSM4626770 | OA |
| GSM4626770_CTGTGCTCAACACCTA-1  | GSM4626770 | OA |
| GSM4626770_CTGTGCTCAATGAATG-1  | GSM4626770 | OA |
| GSM4626770_CTGTGCTGTACTCTCC-1  | GSM4626770 | OA |
| GSM4626770_CTGTGCTGTGCCTTGG-1  | GSM4626770 | OA |
| GSM4626770_CTGTTTAAGAGACTTA-1  | GSM4626770 | OA |
| GSM4626770_CTGTTTAAGCGCTCCA-1  | GSM4626770 | OA |
| GSM4626770_CTGTTTAAGCGTTGCC-1  | GSM4626770 | OA |
| GSM4626770_CTGTTTACACAGCCCA-1  | GSM4626770 | OA |
| GSM4626770_CTGTTTAGTCCGAGTC-1  | GSM4626770 | OA |
| GSM4626770_CTGTTTAGTTCGCTTTC-1 | GSM4626770 | OA |
| GSM4626770_CTGTTTAGTCTAGCGC-1  | GSM4626770 | OA |
| GSM4626770_CTGTTTAGTCTCAACA-1  | GSM4626770 | OA |
| GSM4626770_CTGTTTAGTTCAGCGC-1  | GSM4626770 | OA |
| GSM4626770_CTGTTTAGTTCATGA-1   | GSM4626770 | OA |
| GSM4626770_CTGTTTATCCGACTT-1   | GSM4626770 | OA |
| GSM4626770_CTGTTTATCTCTGCTG-1  | GSM4626770 | OA |
| GSM4626770_CTTAACTCATGCCTAA-1  | GSM4626770 | OA |
| GSM4626770_CTTAACTGTAATAGCA-1  | GSM4626770 | OA |

|                                |            |    |
|--------------------------------|------------|----|
| GSM4626770_CTTAACTTCAGATAAG-1  | GSM4626770 | OA |
| GSM4626770_CTTACCGAGCAGCCTC-1  | GSM4626770 | OA |
| GSM4626770_CTTACCGAGCCCAATT-1  | GSM4626770 | OA |
| GSM4626770_CTTACCGCACAAACGTT-1 | GSM4626770 | OA |
| GSM4626770_CTTACCGCATTAAACCG-1 | GSM4626770 | OA |
| GSM4626770_CTTACCGGTATTACCG-1  | GSM4626770 | OA |
| GSM4626770_CTTACCGTCCGCATCT-1  | GSM4626770 | OA |
| GSM4626770_CTTAGGACATCAGTAC-1  | GSM4626770 | OA |
| GSM4626770_CTTAGGATCCTCAATT-1  | GSM4626770 | OA |
| GSM4626770_CTTCTCTCAAGTCTGT-1  | GSM4626770 | OA |
| GSM4626770_CTTCTCTCAATAGCAA-1  | GSM4626770 | OA |
| GSM4626770_CTTCTCTCAGGCTCAC-1  | GSM4626770 | OA |
| GSM4626770_CTTCTCTCAGTATCTG-1  | GSM4626770 | OA |
| GSM4626770_CTTCTCTGTTACGTCA-1  | GSM4626770 | OA |
| GSM4626770_CTTCTCTGTTGGGACA-1  | GSM4626770 | OA |
| GSM4626770_CTTCTCTTCTACTTAC-1  | GSM4626770 | OA |
| GSM4626770_CTTGGCTAGACAAAGG-1  | GSM4626770 | OA |
| GSM4626770_CTTGGCTAGTGAAGTT-1  | GSM4626770 | OA |
| GSM4626770_CTTGGCTCAGCTGTGC-1  | GSM4626770 | OA |
| GSM4626770_CTTGGCTTCTACTATC-1  | GSM4626770 | OA |
| GSM4626770_CTTGGCTTCTGAGTGT-1  | GSM4626770 | OA |
| GSM4626770_CTTTGCAGCTAGTCT-1   | GSM4626770 | OA |
| GSM4626770_CTTTGCAGGTGATAT-1   | GSM4626770 | OA |
| GSM4626770_CTTTGCAGGTGGGTT-1   | GSM4626770 | OA |
| GSM4626770_CTTTGCAGGTGCCT-1    | GSM4626770 | OA |
| GSM4626770_CTTTGCAGGTAGAGCTG-1 | GSM4626770 | OA |
| GSM4626770_CTTTGCAGTCATAACCG-1 | GSM4626770 | OA |
| GSM4626770_CTTTGCAGTCCGAGCCA-1 | GSM4626770 | OA |
| GSM4626770_CTTTGCAGTCCGTCATC-1 | GSM4626770 | OA |
| GSM4626770_CTTTGCAGTCCGTTGTC-1 | GSM4626770 | OA |
| GSM4626770_CTTTGCAGTCTCTGCTG-1 | GSM4626770 | OA |
| GSM4626770_GAAACTCAGCTCCTCT-1  | GSM4626770 | OA |
| GSM4626770_GAAACTCAGTATCGAA-1  | GSM4626770 | OA |
| GSM4626770_GAAACTCCAAACAACA-1  | GSM4626770 | OA |
| GSM4626770_GAAACTCCAAAGGTGC-1  | GSM4626770 | OA |
| GSM4626770_GAAACTCCAAGAAGAG-1  | GSM4626770 | OA |
| GSM4626770_GAAACTCCACCGAATT-1  | GSM4626770 | OA |
| GSM4626770_GAAACTCCACTGAAGG-1  | GSM4626770 | OA |
| GSM4626770_GAAACTCGTTAGTGGG-1  | GSM4626770 | OA |
| GSM4626770_GAAACTCTCTCTAAGG-1  | GSM4626770 | OA |
| GSM4626770_GAAATGAAGATAGCAT-1  | GSM4626770 | OA |
| GSM4626770_GAAATGAAGCAGACTG-1  | GSM4626770 | OA |
| GSM4626770_GAAATGACAAACTGCT-1  | GSM4626770 | OA |
| GSM4626770_GAAATGACAGTGGAGT-1  | GSM4626770 | OA |
| GSM4626770_GAAATGAGTAAGTGCC-1  | GSM4626770 | OA |
| GSM4626770_GAAATGAGTAGCGTAG-1  | GSM4626770 | OA |
| GSM4626770_GAAATGAGTTCGGCAC-1  | GSM4626770 | OA |
| GSM4626770_GAAATGATCGCTAGCG-1  | GSM4626770 | OA |
| GSM4626770_GAAATGATCTGATTCT-1  | GSM4626770 | OA |
| GSM4626770_GAAATGATCTTTAGTC-1  | GSM4626770 | OA |
| GSM4626770_GAACATCCAATCAGAA-1  | GSM4626770 | OA |
| GSM4626770_GAACATCCAGCGAACA-1  | GSM4626770 | OA |
| GSM4626770_GAACATCGTCAACTGT-1  | GSM4626770 | OA |
| GSM4626770_GAACATCTCAGGTAAA-1  | GSM4626770 | OA |
| GSM4626770_GAACATCTCCAGGGCT-1  | GSM4626770 | OA |
| GSM4626770_GAACCTAAGATGGGTC-1  | GSM4626770 | OA |
| GSM4626770_GAACCTAAGGCAATTA-1  | GSM4626770 | OA |

|                                |            |    |
|--------------------------------|------------|----|
| GSM4626770_GAACGGACAAGCCTAT-1  | GSM4626770 | OA |
| GSM4626770_GAACGGAGTCACCCAG-1  | GSM4626770 | OA |
| GSM4626770_GAACGGATCCGCATCT-1  | GSM4626770 | OA |
| GSM4626770_GAACGGATCTAACTCT-1  | GSM4626770 | OA |
| GSM4626770_GAAGCAGCATGCGCAC-1  | GSM4626770 | OA |
| GSM4626770_GAAGCAGGTAGCGCTC-1  | GSM4626770 | OA |
| GSM4626770_GAAGCAGGTGCGCTTG-1  | GSM4626770 | OA |
| GSM4626770_GAAGCAGTCCATGAGT-1  | GSM4626770 | OA |
| GSM4626770_GAATAAGAGAGCCCAA-1  | GSM4626770 | OA |
| GSM4626770_GAATAAGAGATATACG-1  | GSM4626770 | OA |
| GSM4626770_GAATAAGAGGATCGCA-1  | GSM4626770 | OA |
| GSM4626770_GAATAAGAGTGAACGC-1  | GSM4626770 | OA |
| GSM4626770_GAATAAGGTCACCCAG-1  | GSM4626770 | OA |
| GSM4626770_GAATAAGTCAACCAAC-1  | GSM4626770 | OA |
| GSM4626770_GAATAAGTCATCTGTT-1  | GSM4626770 | OA |
| GSM4626770_GAATAAGTCCGGGTGT-1  | GSM4626770 | OA |
| GSM4626770_GAATAAGTCCGTAGGC-1  | GSM4626770 | OA |
| GSM4626770_GAATAAGTCGTACGGC-1  | GSM4626770 | OA |
| GSM4626770_GAATAAGTCTGTCTAT-1  | GSM4626770 | OA |
| GSM4626770_GAATGAAAGACTCGGA-1  | GSM4626770 | OA |
| GSM4626770_GAATGAAAGGACAGAA-1  | GSM4626770 | OA |
| GSM4626770_GAATGAAAGTAGTGCG-1  | GSM4626770 | OA |
| GSM4626770_GAATGAAGTGATGATA-1  | GSM4626770 | OA |
| GSM4626770_GAATGAATCCGTTGTC-1  | GSM4626770 | OA |
| GSM4626770_GAATGAATCGAGAGCA-1  | GSM4626770 | OA |
| GSM4626770_GAATGAATCGCTTAGA-1  | GSM4626770 | OA |
| GSM4626770_GAATGAATCTCCAACC-1  | GSM4626770 | OA |
| GSM4626770_GAATGAATCTCCGGTT-1  | GSM4626770 | OA |
| GSM4626770_GAATGAATCTTGCAAG-1  | GSM4626770 | OA |
| GSM4626770_GACACGCAGCGTAGTG-1  | GSM4626770 | OA |
| GSM4626770_GACACGCCACATAACC-1  | GSM4626770 | OA |
| GSM4626770_GACACGCCAGGCTCAC-1  | GSM4626770 | OA |
| GSM4626770_GACACGCCATATACCG-1  | GSM4626770 | OA |
| GSM4626770_GACACGCCATTTGCTT-1  | GSM4626770 | OA |
| GSM4626770_GACACGCGTAGATTAG-1  | GSM4626770 | OA |
| GSM4626770_GACACGCGTATAGGTA-1  | GSM4626770 | OA |
| GSM4626770_GACACGCGTGACCAC-1   | GSM4626770 | OA |
| GSM4626770_GACACGCGTGCGAAAC-1  | GSM4626770 | OA |
| GSM4626770_GACACGCTCACCTCGT-1  | GSM4626770 | OA |
| GSM4626770_GACACGCTCCAGGGCT-1  | GSM4626770 | OA |
| GSM4626770_GACAGAGCAAAGGTGC-1  | GSM4626770 | OA |
| GSM4626770_GACAGAGCATATACGC-1  | GSM4626770 | OA |
| GSM4626770_GACAGAGGTTTACTCT-1  | GSM4626770 | OA |
| GSM4626770_GACAGAGTCCAAACTG-1  | GSM4626770 | OA |
| GSM4626770_GACAGAGTCGGGAGTA-1  | GSM4626770 | OA |
| GSM4626770_GACAGAGTCTGAGGGA-1  | GSM4626770 | OA |
| GSM4626770_GACCAATAGATATGCA-1  | GSM4626770 | OA |
| GSM4626770_GACCAATAGCCGGTAA-1  | GSM4626770 | OA |
| GSM4626770_GACCAATCAGTGACAG-1  | GSM4626770 | OA |
| GSM4626770_GACCAATCATACAGCT-1  | GSM4626770 | OA |
| GSM4626770_GACCAATGTTACAGAA-1  | GSM4626770 | OA |
| GSM4626770_GACCAATGTTATCACG-1  | GSM4626770 | OA |
| GSM4626770_GACCAATTTCATCGGAT-1 | GSM4626770 | OA |
| GSM4626770_GACCAATTCTCAAACG-1  | GSM4626770 | OA |
| GSM4626770_GACCTGGAGAACTGTA-1  | GSM4626770 | OA |
| GSM4626770_GACCTGGAGGGCATGT-1  | GSM4626770 | OA |
| GSM4626770_GACCTGGAGTCCCACG-1  | GSM4626770 | OA |

|                                |            |    |
|--------------------------------|------------|----|
| GSM4626770_GACCTGGCAAGCCCAC-1  | GSM4626770 | OA |
| GSM4626770_GACCTGGGTAGTACCT-1  | GSM4626770 | OA |
| GSM4626770_GACCTGGGTCTGATTG-1  | GSM4626770 | OA |
| GSM4626770_GACCTGGTCCTTTCCGG-1 | GSM4626770 | OA |
| GSM4626770_GACGCGTAGCGTTTAC-1  | GSM4626770 | OA |
| GSM4626770_GACGCGTAGTCATGCT-1  | GSM4626770 | OA |
| GSM4626770_GACGCGTAGTGTGGCA-1  | GSM4626770 | OA |
| GSM4626770_GACGCGTCAGACAAAT-1  | GSM4626770 | OA |
| GSM4626770_GACGCGTCAGGAACGT-1  | GSM4626770 | OA |
| GSM4626770_GACGCGTCAGTAAGAT-1  | GSM4626770 | OA |
| GSM4626770_GACGCGTCATCCGGGT-1  | GSM4626770 | OA |
| GSM4626770_GACGCGTGTATGCTTG-1  | GSM4626770 | OA |
| GSM4626770_GACGCGTGTGCACCAC-1  | GSM4626770 | OA |
| GSM4626770_GACGGCTAGAAAGTGG-1  | GSM4626770 | OA |
| GSM4626770_GACGGCTAGCAGACTG-1  | GSM4626770 | OA |
| GSM4626770_GACGGCTAGCCCAATT-1  | GSM4626770 | OA |
| GSM4626770_GACGGCTAGTATTGGA-1  | GSM4626770 | OA |
| GSM4626770_GACGGCTAGTCAATAG-1  | GSM4626770 | OA |
| GSM4626770_GACGGCTAGTCTCGGC-1  | GSM4626770 | OA |
| GSM4626770_GACGGCTCATGGTCAT-1  | GSM4626770 | OA |
| GSM4626770_GACGGCTGTCCTAGCG-1  | GSM4626770 | OA |
| GSM4626770_GACGGCTGTGACTCAT-1  | GSM4626770 | OA |
| GSM4626770_GACGGCTTCGGTGTTA-1  | GSM4626770 | OA |
| GSM4626770_GACGTGCAGAAACCAT-1  | GSM4626770 | OA |
| GSM4626770_GACGTGCAGCCAGTTT-1  | GSM4626770 | OA |
| GSM4626770_GACGTGCAGCTCCTCT-1  | GSM4626770 | OA |
| GSM4626770_GACGTGCAGGATCGCA-1  | GSM4626770 | OA |
| GSM4626770_GACGTGCAGTGACTCT-1  | GSM4626770 | OA |
| GSM4626770_GACGTGCCAAGGGTCA-1  | GSM4626770 | OA |
| GSM4626770_GACGTGCCAAGTAATG-1  | GSM4626770 | OA |
| GSM4626770_GACGTGCCACATGACT-1  | GSM4626770 | OA |
| GSM4626770_GACGTGCCACTAGTAC-1  | GSM4626770 | OA |
| GSM4626770_GACGTGCCATATACGC-1  | GSM4626770 | OA |
| GSM4626770_GACGTGCCATTAACCG-1  | GSM4626770 | OA |
| GSM4626770_GACGTGCGTAAGGATT-1  | GSM4626770 | OA |
| GSM4626770_GACGTGCGTCGATTGT-1  | GSM4626770 | OA |
| GSM4626770_GACGTTAAGGCATTGG-1  | GSM4626770 | OA |
| GSM4626770_GACGTTAGTGCGCTTG-1  | GSM4626770 | OA |
| GSM4626770_GACGTTAGTGGTTTCA-1  | GSM4626770 | OA |
| GSM4626770_GACGTTATCTCCCTGA-1  | GSM4626770 | OA |
| GSM4626770_GACTAACAGATGTGGC-1  | GSM4626770 | OA |
| GSM4626770_GACTAACAGTAACCCT-1  | GSM4626770 | OA |
| GSM4626770_GACTAACAGATTGCT-1   | GSM4626770 | OA |
| GSM4626770_GACTAACGTAGCTCCG-1  | GSM4626770 | OA |
| GSM4626770_GACTAACGTGACTAT-1   | GSM4626770 | OA |
| GSM4626770_GACTAACGTGAACCTT-1  | GSM4626770 | OA |
| GSM4626770_GACTAACGTGATGTCT-1  | GSM4626770 | OA |
| GSM4626770_GACTAACGTGCTGTAT-1  | GSM4626770 | OA |
| GSM4626770_GACTAACGTTTGGGCC-1  | GSM4626770 | OA |
| GSM4626770_GACTACAAGCCAGGAT-1  | GSM4626770 | OA |
| GSM4626770_GACTACAAGCTGTTCA-1  | GSM4626770 | OA |
| GSM4626770_GACTACACAGTCCTTC-1  | GSM4626770 | OA |
| GSM4626770_GACTACACATTGTGCA-1  | GSM4626770 | OA |
| GSM4626770_GACTACAGTCTTCTCG-1  | GSM4626770 | OA |
| GSM4626770_GACTACAGTCTTGCCG-1  | GSM4626770 | OA |
| GSM4626770_GACTACATCCGAATGT-1  | GSM4626770 | OA |
| GSM4626770_GACTACATCGTTACAG-1  | GSM4626770 | OA |

|                                |            |    |
|--------------------------------|------------|----|
| GSM4626770_GACTGCGAGAGATGAG-1  | GSM4626770 | OA |
| GSM4626770_GACTGCGCAGTCAGAG-1  | GSM4626770 | OA |
| GSM4626770_GACTGCGGTATCGCAT-1  | GSM4626770 | OA |
| GSM4626770_GACTGCGTCAGGTA-1    | GSM4626770 | OA |
| GSM4626770_GACTGCGTCCGCTGTT-1  | GSM4626770 | OA |
| GSM4626770_GACTGCGTCCTCAATT-1  | GSM4626770 | OA |
| GSM4626770_GAGCAGAAGACGACGT-1  | GSM4626770 | OA |
| GSM4626770_GAGCAGAAGATGTCGG-1  | GSM4626770 | OA |
| GSM4626770_GAGCAGACAAGCTGGA-1  | GSM4626770 | OA |
| GSM4626770_GAGCAGACATCACAAC-1  | GSM4626770 | OA |
| GSM4626770_GAGCAGAGTACAAGTA-1  | GSM4626770 | OA |
| GSM4626770_GAGCAGAGTACCCAAT-1  | GSM4626770 | OA |
| GSM4626770_GAGCAGATCTAACGGT-1  | GSM4626770 | OA |
| GSM4626770_GAGGTGAAGCGTTTAC-1  | GSM4626770 | OA |
| GSM4626770_GAGGTGAAGTGAACAT-1  | GSM4626770 | OA |
| GSM4626770_GAGGTGACAGTTCATG-1  | GSM4626770 | OA |
| GSM4626770_GAGTCCGAGCAGGTCA-1  | GSM4626770 | OA |
| GSM4626770_GAGTCCGAGGGTGTG-1   | GSM4626770 | OA |
| GSM4626770_GAGTCCGCAGAGTGTG-1  | GSM4626770 | OA |
| GSM4626770_GAGTCCGGTTGGTAAA-1  | GSM4626770 | OA |
| GSM4626770_GATCAGTAGGGTTCGAT-1 | GSM4626770 | OA |
| GSM4626770_GATCAGTAGTACGCC-1   | GSM4626770 | OA |
| GSM4626770_GATCAGTCAATGGTCT-1  | GSM4626770 | OA |
| GSM4626770_GATCAGTGTAAAGGCT-1  | GSM4626770 | OA |
| GSM4626770_GATCAGTGTGTTTGTG-1  | GSM4626770 | OA |
| GSM4626770_GATCAGTTCACATAGC-1  | GSM4626770 | OA |
| GSM4626770_GATCAGTTCCTGTAGA-1  | GSM4626770 | OA |
| GSM4626770_GATCAGTTCCTCAACT-1  | GSM4626770 | OA |
| GSM4626770_GATCGATAGCTAGTGG-1  | GSM4626770 | OA |
| GSM4626770_GATCGATCATCACGAT-1  | GSM4626770 | OA |
| GSM4626770_GATCGATCATCAGTCA-1  | GSM4626770 | OA |
| GSM4626770_GATCGATCATGATCCA-1  | GSM4626770 | OA |
| GSM4626770_GATCGATGTACCATCA-1  | GSM4626770 | OA |
| GSM4626770_GATCGATGTATAGGGC-1  | GSM4626770 | OA |
| GSM4626770_GATCGATGTATGCTTG-1  | GSM4626770 | OA |
| GSM4626770_GATCGATTCTGAGTGT-1  | GSM4626770 | OA |
| GSM4626770_GATCGCGAGCTTCGCG-1  | GSM4626770 | OA |
| GSM4626770_GATCGCGAGGTCGGAT-1  | GSM4626770 | OA |
| GSM4626770_GATCGCGTCTTGACGA-1  | GSM4626770 | OA |
| GSM4626770_GATCGTAAGTAGGTGC-1  | GSM4626770 | OA |
| GSM4626770_GATCGTACATTTCACT-1  | GSM4626770 | OA |
| GSM4626770_GATCGTAGTATATCCG-1  | GSM4626770 | OA |
| GSM4626770_GATCGTATCAAGGCTT-1  | GSM4626770 | OA |
| GSM4626770_GATCGTATCAGCTTAG-1  | GSM4626770 | OA |
| GSM4626770_GATCTAGAGCTGAACG-1  | GSM4626770 | OA |
| GSM4626770_GATCTAGCAAATCCGT-1  | GSM4626770 | OA |
| GSM4626770_GATCTAGCATGCAATC-1  | GSM4626770 | OA |
| GSM4626770_GATCTAGGTAAATACG-1  | GSM4626770 | OA |
| GSM4626770_GATCTAGGTGCGATAG-1  | GSM4626770 | OA |
| GSM4626770_GATCTAGGTGTCTGAT-1  | GSM4626770 | OA |
| GSM4626770_GATCTAGGTTGAGTTC-1  | GSM4626770 | OA |
| GSM4626770_GATCTAGTCCACAGTAC-1 | GSM4626770 | OA |
| GSM4626770_GATCTAGTCCAACCAA-1  | GSM4626770 | OA |
| GSM4626770_GATGAAAAGAGCCTAG-1  | GSM4626770 | OA |
| GSM4626770_GATGAAAAGGCCCTCA-1  | GSM4626770 | OA |
| GSM4626770_GATGAAAAGGTTCCCTA-1 | GSM4626770 | OA |
| GSM4626770_GATGAAACAGGTTTCA-1  | GSM4626770 | OA |



|                                |            |    |
|--------------------------------|------------|----|
| GSM4626770_GATGAAACATCCAACA-1  | GSM4626770 | OA |
| GSM4626770_GATGAAATCAGTTCGA-1  | GSM4626770 | OA |
| GSM4626770_GATGAAATCTGTGCAA-1  | GSM4626770 | OA |
| GSM4626770_GATGAGGAGGATGGAA-1  | GSM4626770 | OA |
| GSM4626770_GATGAGGCAAAGTGCG-1  | GSM4626770 | OA |
| GSM4626770_GATGAGGTCAAAGACA-1  | GSM4626770 | OA |
| GSM4626770_GATGAGGTCGGGAGTA-1  | GSM4626770 | OA |
| GSM4626770_GATGCTAAGCACCGTC-1  | GSM4626770 | OA |
| GSM4626770_GATGCTAAGTAATCCC-1  | GSM4626770 | OA |
| GSM4626770_GATGCTACAATAGAGT-1  | GSM4626770 | OA |
| GSM4626770_GATGCTACAGGGAGAG-1  | GSM4626770 | OA |
| GSM4626770_GATGCTATCACCTTAT-1  | GSM4626770 | OA |
| GSM4626770_GATTCAGCACGAAGCA-1  | GSM4626770 | OA |
| GSM4626770_GATTCAGTCGATCCCT-1  | GSM4626770 | OA |
| GSM4626770_GATTCAGTCTCTTGAT-1  | GSM4626770 | OA |
| GSM4626770_GCAAACCTCACGAGAGT-1 | GSM4626770 | OA |
| GSM4626770_GCAAACCTCAGCTATTG-1 | GSM4626770 | OA |
| GSM4626770_GCAAACCTCAGTCACTA-1 | GSM4626770 | OA |
| GSM4626770_GCAAACCTCATCACGAT-1 | GSM4626770 | OA |
| GSM4626770_GCAAACCTGTAGCTAAA-1 | GSM4626770 | OA |
| GSM4626770_GCAAACCTGTTTAGGAA-1 | GSM4626770 | OA |
| GSM4626770_GCAAACCTTCCCTCTTT-1 | GSM4626770 | OA |
| GSM4626770_GCAAACCTTCTCCGGTT-1 | GSM4626770 | OA |
| GSM4626770_GCAATCAAGCGTCTAT-1  | GSM4626770 | OA |
| GSM4626770_GCAATCACACATTTCT-1  | GSM4626770 | OA |
| GSM4626770_GCAATCACATTCACTT-1  | GSM4626770 | OA |
| GSM4626770_GCAATCAGTAGTGAAT-1  | GSM4626770 | OA |
| GSM4626770_GCAATCAGTATAGTAG-1  | GSM4626770 | OA |
| GSM4626770_GCAATCAGTGTTTCGAT-1 | GSM4626770 | OA |
| GSM4626770_GCAATCAGTTTGCATG-1  | GSM4626770 | OA |
| GSM4626770_GCAATCATCTACTATC-1  | GSM4626770 | OA |
| GSM4626770_GCAATCATCTTTCGGTC-1 | GSM4626770 | OA |
| GSM4626770_GCACATAAGACTAAGT-1  | GSM4626770 | OA |
| GSM4626770_GCACATAAGGTAGCCA-1  | GSM4626770 | OA |
| GSM4626770_GCACATAAGTCAAGCG-1  | GSM4626770 | OA |
| GSM4626770_GCACATACAGATGGCA-1  | GSM4626770 | OA |
| GSM4626770_GCACATACATACCATG-1  | GSM4626770 | OA |
| GSM4626770_GCACATAGTAATTGGA-1  | GSM4626770 | OA |
| GSM4626770_GCACATAGTGTTGGGA-1  | GSM4626770 | OA |
| GSM4626770_GCACATATCCGTAGTA-1  | GSM4626770 | OA |
| GSM4626770_GCACTCTAGCTGCGAA-1  | GSM4626770 | OA |
| GSM4626770_GCACTCTCACATCTTT-1  | GSM4626770 | OA |
| GSM4626770_GCACTCTCACCAGTTA-1  | GSM4626770 | OA |
| GSM4626770_GCACTCTTCAGAGACG-1  | GSM4626770 | OA |
| GSM4626770_GCACTCTTCGCGATCG-1  | GSM4626770 | OA |
| GSM4626770_GCACTCTTCTCGGACG-1  | GSM4626770 | OA |
| GSM4626770_GCAGCCAAGGCATTGG-1  | GSM4626770 | OA |
| GSM4626770_GCAGCCAAGGCTCAGA-1  | GSM4626770 | OA |
| GSM4626770_GCAGCCACACCATCCT-1  | GSM4626770 | OA |
| GSM4626770_GCAGCCACAGTCACTA-1  | GSM4626770 | OA |
| GSM4626770_GCAGCCACATCGACGC-1  | GSM4626770 | OA |
| GSM4626770_GCAGCCAGTCCTAGCG-1  | GSM4626770 | OA |
| GSM4626770_GCAGCCATCATTATCC-1  | GSM4626770 | OA |
| GSM4626770_GCAGCCATCCTCAATT-1  | GSM4626770 | OA |
| GSM4626770_GCAGCCATCTAACGGT-1  | GSM4626770 | OA |
| GSM4626770_GCAGTTACAGTCGATT-1  | GSM4626770 | OA |
| GSM4626770_GCAGTTACATGTCCTC-1  | GSM4626770 | OA |

|                               |            |    |
|-------------------------------|------------|----|
| GSM4626770_GCAGTTACATTAACCG-1 | GSM4626770 | OA |
| GSM4626770_GCAGTTATCTCCAGGG-1 | GSM4626770 | OA |
| GSM4626770_GCATACAAGCGAGAAA-1 | GSM4626770 | OA |
| GSM4626770_GCATACACAGTAACGG-1 | GSM4626770 | OA |
| GSM4626770_GCATACACATGTTCCC-1 | GSM4626770 | OA |
| GSM4626770_GCATACAGTTCATGGT-1 | GSM4626770 | OA |
| GSM4626770_GCATACATCCGAATGT-1 | GSM4626770 | OA |
| GSM4626770_GCATGATAGATGGGTC-1 | GSM4626770 | OA |
| GSM4626770_GCATGATAGCCCAACC-1 | GSM4626770 | OA |
| GSM4626770_GCATGATCACAGGTTT-1 | GSM4626770 | OA |
| GSM4626770_GCATGATCACTGCCAG-1 | GSM4626770 | OA |
| GSM4626770_GCATGATGTAGATTAG-1 | GSM4626770 | OA |
| GSM4626770_GCATGCGAGTCCTCCT-1 | GSM4626770 | OA |
| GSM4626770_GCATGCGGTAGGCATG-1 | GSM4626770 | OA |
| GSM4626770_GCATGCGGTGCAGACA-1 | GSM4626770 | OA |
| GSM4626770_GCATGCGTCTCCAACC-1 | GSM4626770 | OA |
| GSM4626770_GCATGTAAGACTAGAT-1 | GSM4626770 | OA |
| GSM4626770_GCATGTAAGGGTATCG-1 | GSM4626770 | OA |
| GSM4626770_GCATGTACAAGTCTGT-1 | GSM4626770 | OA |
| GSM4626770_GCATGTAGTACAGTTC-1 | GSM4626770 | OA |
| GSM4626770_GCATGTAGTCCAAGTT-1 | GSM4626770 | OA |
| GSM4626770_GCATGTATCTAACCGA-1 | GSM4626770 | OA |
| GSM4626770_GCCAAATAGTCAAGCG-1 | GSM4626770 | OA |
| GSM4626770_GCCAAATCACGAAAGC-1 | GSM4626770 | OA |
| GSM4626770_GCCAAATGTATATGAG-1 | GSM4626770 | OA |
| GSM4626770_GCCAAATGTCAACATC-1 | GSM4626770 | OA |
| GSM4626770_GCCAAATGTGCATCTA-1 | GSM4626770 | OA |
| GSM4626770_GCCAAATTCATCGATG-1 | GSM4626770 | OA |
| GSM4626770_GCCAAATTCGTGGGAA-1 | GSM4626770 | OA |
| GSM4626770_GCCTCTAAGCTAGCCC-1 | GSM4626770 | OA |
| GSM4626770_GCCTCTACAACGCACC-1 | GSM4626770 | OA |
| GSM4626770_GCCTCTACACGGACAA-1 | GSM4626770 | OA |
| GSM4626770_GCCTCTACACTGTGTA-1 | GSM4626770 | OA |
| GSM4626770_GCCTCTAGTAACGTTC-1 | GSM4626770 | OA |
| GSM4626770_GCCTCTAGTGCACHTA-1 | GSM4626770 | OA |
| GSM4626770_GCCTCTATCCAGGGCT-1 | GSM4626770 | OA |
| GSM4626770_GCCTCTATCCTGCAGG-1 | GSM4626770 | OA |
| GSM4626770_GCCTCTATCGCCGTGA-1 | GSM4626770 | OA |
| GSM4626770_GCCTCTATCGCTTGTC-1 | GSM4626770 | OA |
| GSM4626770_GCCTCTATCGGTCCGA-1 | GSM4626770 | OA |
| GSM4626770_GCCTCTATCTACTTAC-1 | GSM4626770 | OA |
| GSM4626770_GCGACCAAGCAATATG-1 | GSM4626770 | OA |
| GSM4626770_GCGACCAAGCCGCCTA-1 | GSM4626770 | OA |
| GSM4626770_GCGACCACAGCTGTGC-1 | GSM4626770 | OA |
| GSM4626770_GCGACCAGTAAGAGGA-1 | GSM4626770 | OA |
| GSM4626770_GCGACCAGTATAGGTA-1 | GSM4626770 | OA |
| GSM4626770_GCGACCAGTGTCGCTG-1 | GSM4626770 | OA |
| GSM4626770_GCGAGAACAACGATGG-1 | GSM4626770 | OA |
| GSM4626770_GCGAGAACAATCTACG-1 | GSM4626770 | OA |
| GSM4626770_GCGAGAACATAGAAAC-1 | GSM4626770 | OA |
| GSM4626770_GCGAGAAGTCTCCACT-1 | GSM4626770 | OA |
| GSM4626770_GCGAGAAGTTCGTGAT-1 | GSM4626770 | OA |
| GSM4626770_GCGCAACAGCTCTCGG-1 | GSM4626770 | OA |
| GSM4626770_GCGCAACAGGTGGGTT-1 | GSM4626770 | OA |
| GSM4626770_GCGCAACGTTGGTGGA-1 | GSM4626770 | OA |
| GSM4626770_GCGCAGTAGGCATGTG-1 | GSM4626770 | OA |
| GSM4626770_GCGCAGTCAAGTAATG-1 | GSM4626770 | OA |

|                               |            |    |
|-------------------------------|------------|----|
| GSM4626770_GCGCAGTCATATGGTC-1 | GSM4626770 | OA |
| GSM4626770_GCGCAGTCATGCTAGT-1 | GSM4626770 | OA |
| GSM4626770_GCGCAGTGTCATGCAT-1 | GSM4626770 | OA |
| GSM4626770_GCGCAGTTCCGTTGCT-1 | GSM4626770 | OA |
| GSM4626770_GCGCCAAAGACTAAGT-1 | GSM4626770 | OA |
| GSM4626770_GCGCCAAAGATGTCGG-1 | GSM4626770 | OA |
| GSM4626770_GCGCCAAAGCGATAGC-1 | GSM4626770 | OA |
| GSM4626770_GCGCCAAAGGACATTA-1 | GSM4626770 | OA |
| GSM4626770_GCGCCAAAGGGAACGG-1 | GSM4626770 | OA |
| GSM4626770_GCGCCAACATTACGAC-1 | GSM4626770 | OA |
| GSM4626770_GCGCCAAGTAAGGGAA-1 | GSM4626770 | OA |
| GSM4626770_GCGCCAAGTACACCGC-1 | GSM4626770 | OA |
| GSM4626770_GCGCCAAGTACATCCA-1 | GSM4626770 | OA |
| GSM4626770_GCGCCAAGTTAAAGAC-1 | GSM4626770 | OA |
| GSM4626770_GCGCCAATCCGGCACA-1 | GSM4626770 | OA |
| GSM4626770_GCGCCAATCGCCCTTA-1 | GSM4626770 | OA |
| GSM4626770_GCGCCAATCTCATTCA-1 | GSM4626770 | OA |
| GSM4626770_GCGCGATAGGGCATGT-1 | GSM4626770 | OA |
| GSM4626770_GCGCGATAGTGAAGTT-1 | GSM4626770 | OA |
| GSM4626770_GCGCGATCAGTCACTA-1 | GSM4626770 | OA |
| GSM4626770_GCGCGATCATCGGACC-1 | GSM4626770 | OA |
| GSM4626770_GCGCGATGTATAGGGC-1 | GSM4626770 | OA |
| GSM4626770_GCGCGATGTGCAGACA-1 | GSM4626770 | OA |
| GSM4626770_GCGCGATTACCCGGGT-1 | GSM4626770 | OA |
| GSM4626770_GCGCGATTCACTACT-1  | GSM4626770 | OA |
| GSM4626770_GCGCGATTCCGCGGTA-1 | GSM4626770 | OA |
| GSM4626770_GCGGGTTAGACTAGGC-1 | GSM4626770 | OA |
| GSM4626770_GCGGGTTCACCTGGTG-1 | GSM4626770 | OA |
| GSM4626770_GCGGGTTCATACGCCG-1 | GSM4626770 | OA |
| GSM4626770_GCGGGTTGTTTGTTC-1  | GSM4626770 | OA |
| GSM4626770_GCGGGTTTCAAGAAGT-1 | GSM4626770 | OA |
| GSM4626770_GCGGGTTTCATCGGAT-1 | GSM4626770 | OA |
| GSM4626770_GCGGGTTTCGAATGGG-1 | GSM4626770 | OA |
| GSM4626770_GCGGGTTTCGACGGAA-1 | GSM4626770 | OA |
| GSM4626770_GCGGGTTTCTTCCTTC-1 | GSM4626770 | OA |
| GSM4626770_GCTCCTAAGAGCCCAA-1 | GSM4626770 | OA |
| GSM4626770_GCTCCTACAAGACACG-1 | GSM4626770 | OA |
| GSM4626770_GCTCCTACATTGGTAC-1 | GSM4626770 | OA |
| GSM4626770_GCTCCTAGTCTTGTC-1  | GSM4626770 | OA |
| GSM4626770_GCTCCTATCCGCGCAA-1 | GSM4626770 | OA |
| GSM4626770_GCTCTGTAGTACGCGA-1 | GSM4626770 | OA |
| GSM4626770_GCTCTGTATAGTAAG-1  | GSM4626770 | OA |
| GSM4626770_GCTCTGTGTCCAATA-1  | GSM4626770 | OA |
| GSM4626770_GCTCTGTGTGCGATAT-1 | GSM4626770 | OA |
| GSM4626770_GCTCTGTGTCTTGCGG-1 | GSM4626770 | OA |
| GSM4626770_GCTCTGTGTTCTCATT-1 | GSM4626770 | OA |
| GSM4626770_GCTGCAGCATGATCCA-1 | GSM4626770 | OA |
| GSM4626770_GCTGCAGGTAAC-1     | GSM4626770 | OA |
| GSM4626770_GCTGCAGGTAGTAGTA-1 | GSM4626770 | OA |
| GSM4626770_GCTGCAGGTCAGATAA-1 | GSM4626770 | OA |
| GSM4626770_GCTGCAGGTGTATGGG-1 | GSM4626770 | OA |
| GSM4626770_GCTGCAGTCAAACAAG-1 | GSM4626770 | OA |
| GSM4626770_GCTGCGAAGTGGTAGC-1 | GSM4626770 | OA |
| GSM4626770_GCTGCGAAGTTTGCCT-1 | GSM4626770 | OA |
| GSM4626770_GCTGCGACAGTGACAG-1 | GSM4626770 | OA |
| GSM4626770_GCTGCGAGTCATGCAT-1 | GSM4626770 | OA |
| GSM4626770_GCTGCGATCATCATT-1  | GSM4626770 | OA |

|                                |            |    |
|--------------------------------|------------|----|
| GSM4626770_GCTGCGATCATCGGAT-1  | GSM4626770 | OA |
| GSM4626770_GCTGCTTAGACCGGAT-1  | GSM4626770 | OA |
| GSM4626770_GCTGCTTAGCTTCGCG-1  | GSM4626770 | OA |
| GSM4626770_GCTGCTTCAGCCTATA-1  | GSM4626770 | OA |
| GSM4626770_GCTGCTTCATCACGAT-1  | GSM4626770 | OA |
| GSM4626770_GCTGCTTGTATAATGG-1  | GSM4626770 | OA |
| GSM4626770_GCTGCTTGTCTCTTTA-1  | GSM4626770 | OA |
| GSM4626770_GCTGCTTTCCTGTAGA-1  | GSM4626770 | OA |
| GSM4626770_GCTGCTTTCCTGCCCTA-1 | GSM4626770 | OA |
| GSM4626770_GCTGGGTAGGGTGTGT-1  | GSM4626770 | OA |
| GSM4626770_GCTGGGTCAGACAAGC-1  | GSM4626770 | OA |
| GSM4626770_GCTGGGTGTAAATGTG-1  | GSM4626770 | OA |
| GSM4626770_GCTTCCAAGCCGCCTA-1  | GSM4626770 | OA |
| GSM4626770_GCTTCCAAGCGATTCT-1  | GSM4626770 | OA |
| GSM4626770_GCTTCCAAGCGGCTTC-1  | GSM4626770 | OA |
| GSM4626770_GCTTCCACAATGCCAT-1  | GSM4626770 | OA |
| GSM4626770_GCTTCCACATCAGTCA-1  | GSM4626770 | OA |
| GSM4626770_GCTTCCACATTGACA-1   | GSM4626770 | OA |
| GSM4626770_GCTTCCAGTACATCCA-1  | GSM4626770 | OA |
| GSM4626770_GCTTCCAGTCTAGAGG-1  | GSM4626770 | OA |
| GSM4626770_GCTTGAAAGCACACAG-1  | GSM4626770 | OA |
| GSM4626770_GCTTGAACACGGCCAT-1  | GSM4626770 | OA |
| GSM4626770_GCTTGAATCATCTGTT-1  | GSM4626770 | OA |
| GSM4626770_GCTTGAATCGGTGTGCG-1 | GSM4626770 | OA |
| GSM4626770_GGAAAGCAGCCATCGC-1  | GSM4626770 | OA |
| GSM4626770_GGAAAGCCAATGGACG-1  | GSM4626770 | OA |
| GSM4626770_GGAAAGCCAGGTGGAT-1  | GSM4626770 | OA |
| GSM4626770_GGAAAGCCAGTAGAGC-1  | GSM4626770 | OA |
| GSM4626770_GGAAAGCGTAAGGGAA-1  | GSM4626770 | OA |
| GSM4626770_GGAAAGCGTCTCTCTG-1  | GSM4626770 | OA |
| GSM4626770_GGAAAGCGTCTGCCAG-1  | GSM4626770 | OA |
| GSM4626770_GGAAAGCGTGGTACAG-1  | GSM4626770 | OA |
| GSM4626770_GGAAAGCGTACTGAC-1   | GSM4626770 | OA |
| GSM4626770_GGAAAGCGTTCCTCCA-1  | GSM4626770 | OA |
| GSM4626770_GGAAAGCTCAGGATCT-1  | GSM4626770 | OA |
| GSM4626770_GGAACTTAGGTCGGAT-1  | GSM4626770 | OA |
| GSM4626770_GGAACTTCATCATCCC-1  | GSM4626770 | OA |
| GSM4626770_GGAACTTGTACCATCA-1  | GSM4626770 | OA |
| GSM4626770_GGAACTTTCAGTATG-1   | GSM4626770 | OA |
| GSM4626770_GGAATAACAAGTACCT-1  | GSM4626770 | OA |
| GSM4626770_GGAATAACACGGCCAT-1  | GSM4626770 | OA |
| GSM4626770_GGAATAACACTCGACG-1  | GSM4626770 | OA |
| GSM4626770_GGAATAAGTACGACCC-1  | GSM4626770 | OA |
| GSM4626770_GGAATAATCCACGACG-1  | GSM4626770 | OA |
| GSM4626770_GGAATAATCTTGCAAG-1  | GSM4626770 | OA |
| GSM4626770_GGACAAGAGATGCGAC-1  | GSM4626770 | OA |
| GSM4626770_GGACAAGAGCGTGAAC-1  | GSM4626770 | OA |
| GSM4626770_GGACAAGAGTACGTAA-1  | GSM4626770 | OA |
| GSM4626770_GGACAAGAGTTTCCTT-1  | GSM4626770 | OA |
| GSM4626770_GGACAAGCAATGAATG-1  | GSM4626770 | OA |
| GSM4626770_GGACAAGCACTATCTT-1  | GSM4626770 | OA |
| GSM4626770_GGACAAGCATCGGGTC-1  | GSM4626770 | OA |
| GSM4626770_GGACAAGGTTCTGTGAT-1 | GSM4626770 | OA |
| GSM4626770_GGACAAGGTTGAGGTG-1  | GSM4626770 | OA |
| GSM4626770_GGACAAGGTTGGTGGA-1  | GSM4626770 | OA |
| GSM4626770_GGACAGACAGACGCCT-1  | GSM4626770 | OA |
| GSM4626770_GGACAGACATCTACGA-1  | GSM4626770 | OA |

|                               |            |    |
|-------------------------------|------------|----|
| GSM4626770_GGACAGAGTCCAAGTT-1 | GSM4626770 | OA |
| GSM4626770_GGACAGAGTGTGAAAT-1 | GSM4626770 | OA |
| GSM4626770_GGACAGATCGATGAGG-1 | GSM4626770 | OA |
| GSM4626770_GGACAGATCGTTTGCC-1 | GSM4626770 | OA |
| GSM4626770_GGACATTGTGATGTCT-1 | GSM4626770 | OA |
| GSM4626770_GGACATTGTGTGAAAT-1 | GSM4626770 | OA |
| GSM4626770_GGACGTCAGAACAAC-1  | GSM4626770 | OA |
| GSM4626770_GGACGTCAGCGCTCCA-1 | GSM4626770 | OA |
| GSM4626770_GGACGTCAGCTTATCG-1 | GSM4626770 | OA |
| GSM4626770_GGACGTCAGGACCACA-1 | GSM4626770 | OA |
| GSM4626770_GGACGTCAGGATGGAA-1 | GSM4626770 | OA |
| GSM4626770_GGACGTCAGGGTTAG-1  | GSM4626770 | OA |
| GSM4626770_GGACGTCATAGGATA-1  | GSM4626770 | OA |
| GSM4626770_GGACGTCTCATTCACT-1 | GSM4626770 | OA |
| GSM4626770_GGACGTCTCTGTCTAT-1 | GSM4626770 | OA |
| GSM4626770_GGAGCAAAGATCGATA-1 | GSM4626770 | OA |
| GSM4626770_GGAGCAAAGGACAGCT-1 | GSM4626770 | OA |
| GSM4626770_GGAGCAACACGGTAGA-1 | GSM4626770 | OA |
| GSM4626770_GGAGCAACAGTACACT-1 | GSM4626770 | OA |
| GSM4626770_GGAGCAAGTAGCGTAG-1 | GSM4626770 | OA |
| GSM4626770_GGATGTTAGACCTTTG-1 | GSM4626770 | OA |
| GSM4626770_GGATGTTAGGTGCTTT-1 | GSM4626770 | OA |
| GSM4626770_GGATGTTGTAAGAGGA-1 | GSM4626770 | OA |
| GSM4626770_GGATGTTGTGTAACGG-1 | GSM4626770 | OA |
| GSM4626770_GGATTACCAGATCGGA-1 | GSM4626770 | OA |
| GSM4626770_GGATTACCAGTGACAG-1 | GSM4626770 | OA |
| GSM4626770_GGATTACGTACTCTCC-1 | GSM4626770 | OA |
| GSM4626770_GGATTACGTAGCGCTC-1 | GSM4626770 | OA |
| GSM4626770_GGATTACGTTGATTG-1  | GSM4626770 | OA |
| GSM4626770_GGATTACTCTGCCCTA-1 | GSM4626770 | OA |
| GSM4626770_GGATTACTCTTCGGTC-1 | GSM4626770 | OA |
| GSM4626770_GGCAATTGTATCGCAT-1 | GSM4626770 | OA |
| GSM4626770_GGCAATTGTGCCTGCA-1 | GSM4626770 | OA |
| GSM4626770_GGCAATTGTTAAGAAC-1 | GSM4626770 | OA |
| GSM4626770_GGCAATTGTTCTGTTT-1 | GSM4626770 | OA |
| GSM4626770_GGCAATTTAGGTAAA-1  | GSM4626770 | OA |
| GSM4626770_GGCCGATAGGACATTA-1 | GSM4626770 | OA |
| GSM4626770_GGCCGATAGGGCTCTC-1 | GSM4626770 | OA |
| GSM4626770_GGCCGATAGTATTGGA-1 | GSM4626770 | OA |
| GSM4626770_GGCCGATCAAGTCTGT-1 | GSM4626770 | OA |
| GSM4626770_GGCCGATCAGTATCTG-1 | GSM4626770 | OA |
| GSM4626770_GGCCGATCATGTCCTC-1 | GSM4626770 | OA |
| GSM4626770_GGCCGATGTCCCTTGT-1 | GSM4626770 | OA |
| GSM4626770_GGCCGATGTGGGTATG-1 | GSM4626770 | OA |
| GSM4626770_GGCCGATTCAGCATGT-1 | GSM4626770 | OA |
| GSM4626770_GGCGACTCAAGTTCTG-1 | GSM4626770 | OA |
| GSM4626770_GGCGACTCACCGCTAG-1 | GSM4626770 | OA |
| GSM4626770_GGCGACTCAGACTCGC-1 | GSM4626770 | OA |
| GSM4626770_GGCGACTGTACATGTC-1 | GSM4626770 | OA |
| GSM4626770_GGCGACTTCACCGGGT-1 | GSM4626770 | OA |
| GSM4626770_GGCGTGTTCGCGAGTG-1 | GSM4626770 | OA |
| GSM4626770_GGCGTGTTCGCTTG-1   | GSM4626770 | OA |
| GSM4626770_GGCTCGAAGCTCAACT-1 | GSM4626770 | OA |
| GSM4626770_GGCTCGAAGTTACGGG-1 | GSM4626770 | OA |
| GSM4626770_GGCTCGACAAGCGATG-1 | GSM4626770 | OA |
| GSM4626770_GGCTCGACAGTAACGG-1 | GSM4626770 | OA |
| GSM4626770_GGCTCGACATGTAGTC-1 | GSM4626770 | OA |

|                                |            |    |
|--------------------------------|------------|----|
| GSM4626770_GGCTCGAGTAATAGCA-1  | GSM4626770 | OA |
| GSM4626770_GGCTCGAGTACTTAGC-1  | GSM4626770 | OA |
| GSM4626770_GGCTCGAGTCACCTAA-1  | GSM4626770 | OA |
| GSM4626770_GGCTCGATCTATGTGG-1  | GSM4626770 | OA |
| GSM4626770_GGCTGGTAGACTTTTCG-1 | GSM4626770 | OA |
| GSM4626770_GGCTGGTAGGAATTAC-1  | GSM4626770 | OA |
| GSM4626770_GGCTGGTGTAGAAGGA-1  | GSM4626770 | OA |
| GSM4626770_GGCTGGTGTTCGGCTCA-1 | GSM4626770 | OA |
| GSM4626770_GGCTGGTGTTAGTGGG-1  | GSM4626770 | OA |
| GSM4626770_GGCTGGTGTTCGACTT-1  | GSM4626770 | OA |
| GSM4626770_GGCTGGTGTTCGGACA-1  | GSM4626770 | OA |
| GSM4626770_GGCTGGTTCAAAGACA-1  | GSM4626770 | OA |
| GSM4626770_GGCTGGTTCATCGATG-1  | GSM4626770 | OA |
| GSM4626770_GGGAATGAGTGTACTC-1  | GSM4626770 | OA |
| GSM4626770_GGGACCTAGGCGCTCT-1  | GSM4626770 | OA |
| GSM4626770_GGGACCTCATGCATGT-1  | GSM4626770 | OA |
| GSM4626770_GGGACCTCCGCAGTG-1   | GSM4626770 | OA |
| GSM4626770_GGGAGATCACATCCGG-1  | GSM4626770 | OA |
| GSM4626770_GGGAGATCAGCGAACA-1  | GSM4626770 | OA |
| GSM4626770_GGGAGATCATCGATGT-1  | GSM4626770 | OA |
| GSM4626770_GGGAGATGTAGGCATG-1  | GSM4626770 | OA |
| GSM4626770_GGGAGATGTGTAAGTA-1  | GSM4626770 | OA |
| GSM4626770_GGGAGATTCCCAAGTA-1  | GSM4626770 | OA |
| GSM4626770_GGGAGATTCCCGACTT-1  | GSM4626770 | OA |
| GSM4626770_GGGAGATTCCGGTTAAC-1 | GSM4626770 | OA |
| GSM4626770_GGGAGATTCTTAGAGC-1  | GSM4626770 | OA |
| GSM4626770_GGGAGATTCTTCGGTC-1  | GSM4626770 | OA |
| GSM4626770_GGGATGAAGCGATTCT-1  | GSM4626770 | OA |
| GSM4626770_GGGATGAAGTACGCGA-1  | GSM4626770 | OA |
| GSM4626770_GGGATGACAAGCCTAT-1  | GSM4626770 | OA |
| GSM4626770_GGGATGACAAGGACTG-1  | GSM4626770 | OA |
| GSM4626770_GGGATGACAGACTCGC-1  | GSM4626770 | OA |
| GSM4626770_GGGATGAGTTACGGAG-1  | GSM4626770 | OA |
| GSM4626770_GGGATGATCCGCGTTT-1  | GSM4626770 | OA |
| GSM4626770_GGGATGATCGGATGTT-1  | GSM4626770 | OA |
| GSM4626770_GGGCACTAGATCCTGT-1  | GSM4626770 | OA |
| GSM4626770_GGGCACTAGCGCCTCA-1  | GSM4626770 | OA |
| GSM4626770_GGGCACTCACCTATCC-1  | GSM4626770 | OA |
| GSM4626770_GGGCACTCATCGATGT-1  | GSM4626770 | OA |
| GSM4626770_GGGCACTGTACAGTGG-1  | GSM4626770 | OA |
| GSM4626770_GGGCACTGTCATGCAT-1  | GSM4626770 | OA |
| GSM4626770_GGGCACTGTCTACCTC-1  | GSM4626770 | OA |
| GSM4626770_GGGCACTTCATGCAAC-1  | GSM4626770 | OA |
| GSM4626770_GGGCACTTCGCAAGCC-1  | GSM4626770 | OA |
| GSM4626770_GGGCACTTCGCTAGCG-1  | GSM4626770 | OA |
| GSM4626770_GGGCATCCACTAGTAC-1  | GSM4626770 | OA |
| GSM4626770_GGGCATCCAGGTTTCA-1  | GSM4626770 | OA |
| GSM4626770_GGGCATCCAGTATAAG-1  | GSM4626770 | OA |
| GSM4626770_GGGCATCTCCTTTCTC-1  | GSM4626770 | OA |
| GSM4626770_GGGCATCTCGAGCAA-1   | GSM4626770 | OA |
| GSM4626770_GGGTCTGAGCGTGTCC-1  | GSM4626770 | OA |
| GSM4626770_GGGTCTGAGCTAAGAT-1  | GSM4626770 | OA |
| GSM4626770_GGGTCTGAGGATCGCA-1  | GSM4626770 | OA |
| GSM4626770_GGGTCTGAGTCGTA-1    | GSM4626770 | OA |
| GSM4626770_GGGTCTGAGTTTCCTT-1  | GSM4626770 | OA |
| GSM4626770_GGGTCTGGTCCGTCAG-1  | GSM4626770 | OA |
| GSM4626770_GGGTCTGGTGAAAGAG-1  | GSM4626770 | OA |

|                                |            |    |
|--------------------------------|------------|----|
| GSM4626770_GGGTCTGTCCCTAATT-1  | GSM4626770 | OA |
| GSM4626770_GGGTTGCCAACGATGG-1  | GSM4626770 | OA |
| GSM4626770_GGGTTGCCAAGTAATG-1  | GSM4626770 | OA |
| GSM4626770_GGGTTGCCATGCTAGT-1  | GSM4626770 | OA |
| GSM4626770_GGGTTGCCATTAACCG-1  | GSM4626770 | OA |
| GSM4626770_GGGTTGCGTGGAAGA-1   | GSM4626770 | OA |
| GSM4626770_GGGTTGCTCGGAAACG-1  | GSM4626770 | OA |
| GSM4626770_GGGTTGCTCTGGTTCC-1  | GSM4626770 | OA |
| GSM4626770_GGTATTGAGCGTTGCC-1  | GSM4626770 | OA |
| GSM4626770_GGTATTGAGGACATTA-1  | GSM4626770 | OA |
| GSM4626770_GGTATTGAGGTAGCTG-1  | GSM4626770 | OA |
| GSM4626770_GGTATTGCATGACGGA-1  | GSM4626770 | OA |
| GSM4626770_GGTATTGGTACAGTGG-1  | GSM4626770 | OA |
| GSM4626770_GGTATTGGTGATAAAC-1  | GSM4626770 | OA |
| GSM4626770_GGTATTGGTGCTAGCC-1  | GSM4626770 | OA |
| GSM4626770_GGTATTGTCACGCGGT-1  | GSM4626770 | OA |
| GSM4626770_GGTGAAGAGGACAGCT-1  | GSM4626770 | OA |
| GSM4626770_GGTGAAGCACACGCTG-1  | GSM4626770 | OA |
| GSM4626770_GGTGAAGGTCATGCAT-1  | GSM4626770 | OA |
| GSM4626770_GGTGAAGGTGATGTCT-1  | GSM4626770 | OA |
| GSM4626770_GGTGAAGTCAGCTGGC-1  | GSM4626770 | OA |
| GSM4626770_GGTGAAGTCATTCCT-1   | GSM4626770 | OA |
| GSM4626770_GGTGAAGTCCCATTAT-1  | GSM4626770 | OA |
| GSM4626770_GGTGAAGTCCGCAGTG-1  | GSM4626770 | OA |
| GSM4626770_GGTGCGTAGCCACTAT-1  | GSM4626770 | OA |
| GSM4626770_GGTGCGTCACCTGGTG-1  | GSM4626770 | OA |
| GSM4626770_GGTGCGTCACGAAAGC-1  | GSM4626770 | OA |
| GSM4626770_GGTGCGTCAGTCACTA-1  | GSM4626770 | OA |
| GSM4626770_GGTGCGTGATCAGTC-1   | GSM4626770 | OA |
| GSM4626770_GGTGCGTGTCAAAGCG-1  | GSM4626770 | OA |
| GSM4626770_GGTGTTAAGACCTTTG-1  | GSM4626770 | OA |
| GSM4626770_GGTGTTAAGCTAGCCC-1  | GSM4626770 | OA |
| GSM4626770_GGTGTTAAGCTGAAAT-1  | GSM4626770 | OA |
| GSM4626770_GGTGTTAAGGCCCTTG-1  | GSM4626770 | OA |
| GSM4626770_GGTGTTAAGTTCCACA-1  | GSM4626770 | OA |
| GSM4626770_GGTGTTACACGAGAGT-1  | GSM4626770 | OA |
| GSM4626770_GGTGTTACATCAGTAC-1  | GSM4626770 | OA |
| GSM4626770_GGTGTTAGTATCACCA-1  | GSM4626770 | OA |
| GSM4626770_GGTGTTAGTCGTCTTC-1  | GSM4626770 | OA |
| GSM4626770_GGTGTTAGTTCCACAA-1  | GSM4626770 | OA |
| GSM4626770_GGTGTTATCACCAGGC-1  | GSM4626770 | OA |
| GSM4626770_GGTGTTATCCGAGCCA-1  | GSM4626770 | OA |
| GSM4626770_GGTGTTATCTGATTCT-1  | GSM4626770 | OA |
| GSM4626770_GTAACGTAGCAAATCA-1  | GSM4626770 | OA |
| GSM4626770_GTAACGTGTACGCACC-1  | GSM4626770 | OA |
| GSM4626770_GTAACGTGTCTGCGGT-1  | GSM4626770 | OA |
| GSM4626770_GTAACGTTTCGATAGAA-1 | GSM4626770 | OA |
| GSM4626770_GTAACTGAGTAGCGGT-1  | GSM4626770 | OA |
| GSM4626770_GTAACTGAGTCTCGGC-1  | GSM4626770 | OA |
| GSM4626770_GTAACTGCAAGCCATT-1  | GSM4626770 | OA |
| GSM4626770_GTAACTGTCAATAAGG-1  | GSM4626770 | OA |
| GSM4626770_GTAACTGTCATCACCC-1  | GSM4626770 | OA |
| GSM4626770_GTAACTGTCGCCTGTT-1  | GSM4626770 | OA |
| GSM4626770_GTAACTGTCTTGAGGT-1  | GSM4626770 | OA |
| GSM4626770_GTACGTAAGTGGACGT-1  | GSM4626770 | OA |
| GSM4626770_GTACGTACAGGCTGAA-1  | GSM4626770 | OA |
| GSM4626770_GTACGTACATCACCCCT-1 | GSM4626770 | OA |

|                                |            |    |
|--------------------------------|------------|----|
| GSM4626770_GTACGTAGTCAAAGCG-1  | GSM4626770 | OA |
| GSM4626770_GTACGTATCAAAGACA-1  | GSM4626770 | OA |
| GSM4626770_GTACGTATCAACACGT-1  | GSM4626770 | OA |
| GSM4626770_GTACGTATCCCACTTG-1  | GSM4626770 | OA |
| GSM4626770_GTACGTATCCGTACAA-1  | GSM4626770 | OA |
| GSM4626770_GTACTCCAGCCTTGAT-1  | GSM4626770 | OA |
| GSM4626770_GTACTCCCAAGCCATT-1  | GSM4626770 | OA |
| GSM4626770_GTACTCCCACTAGTAC-1  | GSM4626770 | OA |
| GSM4626770_GTACTCCCATTTCACT-1  | GSM4626770 | OA |
| GSM4626770_GTACTCCGTGCAGGTA-1  | GSM4626770 | OA |
| GSM4626770_GTACTCCGTTATGCGT-1  | GSM4626770 | OA |
| GSM4626770_GTACTCCGTTTCAGACT-1 | GSM4626770 | OA |
| GSM4626770_GTACTCCTCGGAAATA-1  | GSM4626770 | OA |
| GSM4626770_GTACTTTAGGAGTTTA-1  | GSM4626770 | OA |
| GSM4626770_GTACTTTCAATGAAAC-1  | GSM4626770 | OA |
| GSM4626770_GTACTTTTCAGCTATTG-1 | GSM4626770 | OA |
| GSM4626770_GTACTTTTCAGGACGTA-1 | GSM4626770 | OA |
| GSM4626770_GTACTTTGTATCACCA-1  | GSM4626770 | OA |
| GSM4626770_GTACTTTGTGAGGGTT-1  | GSM4626770 | OA |
| GSM4626770_GTACTTTTCACATGCA-1  | GSM4626770 | OA |
| GSM4626770_GTACTTTTCATACGGT-1  | GSM4626770 | OA |
| GSM4626770_GTAGGCCAGATCTGAA-1  | GSM4626770 | OA |
| GSM4626770_GTAGGCCCATGGTAGG-1  | GSM4626770 | OA |
| GSM4626770_GTAGTCAAGCCCAGCT-1  | GSM4626770 | OA |
| GSM4626770_GTAGTCACACACTGCG-1  | GSM4626770 | OA |
| GSM4626770_GTAGTCACACATAACC-1  | GSM4626770 | OA |
| GSM4626770_GTAGTCACATCTGGTA-1  | GSM4626770 | OA |
| GSM4626770_GTAGTCAGTTGGGACA-1  | GSM4626770 | OA |
| GSM4626770_GTAGTCATCAACGGGA-1  | GSM4626770 | OA |
| GSM4626770_GTAGTCATCATGTCTT-1  | GSM4626770 | OA |
| GSM4626770_GTAGTCATCTGGCGTG-1  | GSM4626770 | OA |
| GSM4626770_GTAGTCATCTGTTTGT-1  | GSM4626770 | OA |
| GSM4626770_GTATCTTAGCGCCTCA-1  | GSM4626770 | OA |
| GSM4626770_GTATCTTAGTACGCGA-1  | GSM4626770 | OA |
| GSM4626770_GTATCTTCACACCGAC-1  | GSM4626770 | OA |
| GSM4626770_GTATCTTGTTGTGGAG-1  | GSM4626770 | OA |
| GSM4626770_GTATCTTTCTCCCTGA-1  | GSM4626770 | OA |
| GSM4626770_GTATTCTAGAAGGTTT-1  | GSM4626770 | OA |
| GSM4626770_GTATTCTAGGCATGTG-1  | GSM4626770 | OA |
| GSM4626770_GTATTCTCAATCGAAA-1  | GSM4626770 | OA |
| GSM4626770_GTATTCTGTCTAAACC-1  | GSM4626770 | OA |
| GSM4626770_GTATTCTGTTGGGACA-1  | GSM4626770 | OA |
| GSM4626770_GTATTCTTCCAAACAC-1  | GSM4626770 | OA |
| GSM4626770_GTATTCTTCTCATTCA-1  | GSM4626770 | OA |
| GSM4626770_GTATTCTTCTTACCGC-1  | GSM4626770 | OA |
| GSM4626770_GTCAAGTAGAGGTTGC-1  | GSM4626770 | OA |
| GSM4626770_GTCAAGTAGAGTGAGA-1  | GSM4626770 | OA |
| GSM4626770_GTCAAGTCAAAGCGGT-1  | GSM4626770 | OA |
| GSM4626770_GTCAAGTCAATCAGAA-1  | GSM4626770 | OA |
| GSM4626770_GTCAAGTCATACTACG-1  | GSM4626770 | OA |
| GSM4626770_GTCAAGTCATCTGGTA-1  | GSM4626770 | OA |
| GSM4626770_GTCAAGTGTACTCGCG-1  | GSM4626770 | OA |
| GSM4626770_GTCAAGTGTAGCTCCG-1  | GSM4626770 | OA |
| GSM4626770_GTCAAGTGTGTCTGAT-1  | GSM4626770 | OA |
| GSM4626770_GTCAAGTTCAGATAAG-1  | GSM4626770 | OA |
| GSM4626770_GTCAAGTTCACGAAT-1   | GSM4626770 | OA |
| GSM4626770_GTCAAGTTCCTTCCTC-1  | GSM4626770 | OA |



|                                |            |    |
|--------------------------------|------------|----|
| GSM4626770_GTCACAAAGAATGTTG-1  | GSM4626770 | OA |
| GSM4626770_GTCACAAAGTCGAGTG-1  | GSM4626770 | OA |
| GSM4626770_GTCACAAGTCGGCACT-1  | GSM4626770 | OA |
| GSM4626770_GTCACAAGTGTGACCC-1  | GSM4626770 | OA |
| GSM4626770_GTCACAAGTTACTGAC-1  | GSM4626770 | OA |
| GSM4626770_GTCACAATCAGGCCCA-1  | GSM4626770 | OA |
| GSM4626770_GTCACAATCCTATGTT-1  | GSM4626770 | OA |
| GSM4626770_GTCACGGAGACACTAA-1  | GSM4626770 | OA |
| GSM4626770_GTCACGGAGGTAAACT-1  | GSM4626770 | OA |
| GSM4626770_GTCACGGCATTGAGCT-1  | GSM4626770 | OA |
| GSM4626770_GTCACGGGTGTGAAAT-1  | GSM4626770 | OA |
| GSM4626770_GTCACGGTCTCTAGC-1   | GSM4626770 | OA |
| GSM4626770_GTCACGGTCTGCGGCA-1  | GSM4626770 | OA |
| GSM4626770_GTCATTTAGAGGGATA-1  | GSM4626770 | OA |
| GSM4626770_GTCATTTAGTACATGA-1  | GSM4626770 | OA |
| GSM4626770_GTCATTTTCAGGACCCT-1 | GSM4626770 | OA |
| GSM4626770_GTCATTTGTGCCTTGG-1  | GSM4626770 | OA |
| GSM4626770_GTCATTTTCACTCCTG-1  | GSM4626770 | OA |
| GSM4626770_GTCATTTTCACTGGGC-1  | GSM4626770 | OA |
| GSM4626770_GTCATTTTCTAGTGA-1   | GSM4626770 | OA |
| GSM4626770_GTCATTTTTCGCAAAC-1  | GSM4626770 | OA |
| GSM4626770_GTCATTTTCTTGTACT-1  | GSM4626770 | OA |
| GSM4626770_GTCCTCAAGACTGGGT-1  | GSM4626770 | OA |
| GSM4626770_GTCCTCAAGAGCTGCA-1  | GSM4626770 | OA |
| GSM4626770_GTCCTCAGTGCGAAAC-1  | GSM4626770 | OA |
| GSM4626770_GTCCTCAGTTAAGGGC-1  | GSM4626770 | OA |
| GSM4626770_GTCCTCATCCTTTCTC-1  | GSM4626770 | OA |
| GSM4626770_GTCCTCATCGGACAAG-1  | GSM4626770 | OA |
| GSM4626770_GTCCTCATCGGTCTAA-1  | GSM4626770 | OA |
| GSM4626770_GTCGGGTAGGCATGTG-1  | GSM4626770 | OA |
| GSM4626770_GTCGGGTACATTAGC-1   | GSM4626770 | OA |
| GSM4626770_GTCGGGTCACTAGTAC-1  | GSM4626770 | OA |
| GSM4626770_GTCGGGTCAAGTGGAT-1  | GSM4626770 | OA |
| GSM4626770_GTCGGGTGTGAGGGTT-1  | GSM4626770 | OA |
| GSM4626770_GTCGGGTTCAAACAAG-1  | GSM4626770 | OA |
| GSM4626770_GTCGGGTTTATGTAGC-1  | GSM4626770 | OA |
| GSM4626770_GTCGGGTTTCGCAAGCC-1 | GSM4626770 | OA |
| GSM4626770_GTCGGGTTCTGTCTCG-1  | GSM4626770 | OA |
| GSM4626770_GTCGTAAAGCCACGTC-1  | GSM4626770 | OA |
| GSM4626770_GTCGTAAAGGTCATCT-1  | GSM4626770 | OA |
| GSM4626770_GTCGTAAATCACAGTAC-1 | GSM4626770 | OA |
| GSM4626770_GTCGTAAATCTAGAGTC-1 | GSM4626770 | OA |
| GSM4626770_GTCTCGTCAGCTGTGC-1  | GSM4626770 | OA |
| GSM4626770_GTCTCGTCAGTAAGCG-1  | GSM4626770 | OA |
| GSM4626770_GTCTCGTCAGTATGCT-1  | GSM4626770 | OA |
| GSM4626770_GTCTCGTCATGGACA-1   | GSM4626770 | OA |
| GSM4626770_GTCTCGTGTGACAAAT-1  | GSM4626770 | OA |
| GSM4626770_GTCTCGTTCACCCGAG-1  | GSM4626770 | OA |
| GSM4626770_GTCTCGTTCGCATGGC-1  | GSM4626770 | OA |
| GSM4626770_GTCTCGTTCGTCTGAA-1  | GSM4626770 | OA |
| GSM4626770_GTCTTCGAGGCGACAT-1  | GSM4626770 | OA |
| GSM4626770_GTCTTCGCATACTCTT-1  | GSM4626770 | OA |
| GSM4626770_GTCTTCGGTTAAAGTG-1  | GSM4626770 | OA |
| GSM4626770_GTGAAGGCATCACCT-1   | GSM4626770 | OA |
| GSM4626770_GTGAAGGCATCGGTTA-1  | GSM4626770 | OA |
| GSM4626770_GTGAAGGGTTCGCATCG-1 | GSM4626770 | OA |
| GSM4626770_GTGAAGGGTTCTGAAC-1  | GSM4626770 | OA |

|                               |            |    |
|-------------------------------|------------|----|
| GSM4626770_GTGAAGGTCACATACG-1 | GSM4626770 | OA |
| GSM4626770_GTGAAGGTCGAGAGCA-1 | GSM4626770 | OA |
| GSM4626770_GTGCAGCCAAAGCGGT-1 | GSM4626770 | OA |
| GSM4626770_GTGCAGCCAGCATGAG-1 | GSM4626770 | OA |
| GSM4626770_GTGCAGCCATGCAATC-1 | GSM4626770 | OA |
| GSM4626770_GTGCAGCCATGCTGGC-1 | GSM4626770 | OA |
| GSM4626770_GTGCAGCGTGGCCCTA-1 | GSM4626770 | OA |
| GSM4626770_GTGCAGCTCACCATAG-1 | GSM4626770 | OA |
| GSM4626770_GTGCAGCTCCCTCTTT-1 | GSM4626770 | OA |
| GSM4626770_GTGCAGCTCCTGCCAT-1 | GSM4626770 | OA |
| GSM4626770_GTGCAGCTCGAATGCT-1 | GSM4626770 | OA |
| GSM4626770_GTGCATAAGCTGTTCA-1 | GSM4626770 | OA |
| GSM4626770_GTGCATACAATACGCT-1 | GSM4626770 | OA |
| GSM4626770_GTGCATACAATGACCT-1 | GSM4626770 | OA |
| GSM4626770_GTGCATACATGGTCTA-1 | GSM4626770 | OA |
| GSM4626770_GTGCGGTAGGTTCTA-1  | GSM4626770 | OA |
| GSM4626770_GTGCGGTGTACTCGCG-1 | GSM4626770 | OA |
| GSM4626770_GTGCGGTGTCAAATC-1  | GSM4626770 | OA |
| GSM4626770_GTGCGGTGTCAAAGAT-1 | GSM4626770 | OA |
| GSM4626770_GTGCGGTGTGCCTTGG-1 | GSM4626770 | OA |
| GSM4626770_GTGCGGTTCAAGATCC-1 | GSM4626770 | OA |
| GSM4626770_GTGCGGTTCTTGAGGT-1 | GSM4626770 | OA |
| GSM4626770_GTGCTTCCACAGCGTC-1 | GSM4626770 | OA |
| GSM4626770_GTGCTTCCACGAAAGC-1 | GSM4626770 | OA |
| GSM4626770_GTGCTTCCAGGGTTAG-1 | GSM4626770 | OA |
| GSM4626770_GTGCTTCGTAAATACG-1 | GSM4626770 | OA |
| GSM4626770_GTGCTTCGTACAGACG-1 | GSM4626770 | OA |
| GSM4626770_GTGCTTCGTGTCTGAT-1 | GSM4626770 | OA |
| GSM4626770_GTGCTTCGTTTGACAC-1 | GSM4626770 | OA |
| GSM4626770_GTGGGTCAGACTGGGT-1 | GSM4626770 | OA |
| GSM4626770_GTGGGTCAGATACACA-1 | GSM4626770 | OA |
| GSM4626770_GTGGGTCCAACTGGCC-1 | GSM4626770 | OA |
| GSM4626770_GTGGGTCACGCATCG-1  | GSM4626770 | OA |
| GSM4626770_GTGTGCGAGCTGTCTA-1 | GSM4626770 | OA |
| GSM4626770_GTGTGCGAGTACACCT-1 | GSM4626770 | OA |
| GSM4626770_GTGTGCGCACCGAATT-1 | GSM4626770 | OA |
| GSM4626770_GTGTGCGGTCGGCTCA-1 | GSM4626770 | OA |
| GSM4626770_GTGTGCGGTTCAGGCC-1 | GSM4626770 | OA |
| GSM4626770_GTGTTAGAGTACGACG-1 | GSM4626770 | OA |
| GSM4626770_GTGTTAGCAAGTACCT-1 | GSM4626770 | OA |
| GSM4626770_GTGTTAGCAGCCACCA-1 | GSM4626770 | OA |
| GSM4626770_GTGTTAGCATTTCAGG-1 | GSM4626770 | OA |
| GSM4626770_GTGTTAGGTCATTCC-1  | GSM4626770 | OA |
| GSM4626770_GTGTTAGGTCTAACGT-1 | GSM4626770 | OA |
| GSM4626770_GTGTTAGTCACGCGGT-1 | GSM4626770 | OA |
| GSM4626770_GTGTTAGTCATGTCTT-1 | GSM4626770 | OA |
| GSM4626770_GTTAAGCAGTACTCT-1  | GSM4626770 | OA |
| GSM4626770_GTTAAGCCACTGTCGG-1 | GSM4626770 | OA |
| GSM4626770_GTTAAGCCATGTTCCC-1 | GSM4626770 | OA |
| GSM4626770_GTTAAGCCATTGGGCC-1 | GSM4626770 | OA |
| GSM4626770_GTTAAGCGTAAAGTCA-1 | GSM4626770 | OA |
| GSM4626770_GTTACAGAGGCTCATT-1 | GSM4626770 | OA |
| GSM4626770_GTTACAGCAGTGAGTG-1 | GSM4626770 | OA |
| GSM4626770_GTTACAGGTGAGTATA-1 | GSM4626770 | OA |
| GSM4626770_GTTACAGGTGTCCTCT-1 | GSM4626770 | OA |
| GSM4626770_GTTACAGTCCTGCTTG-1 | GSM4626770 | OA |
| GSM4626770_GTTCATTAGATGAGAG-1 | GSM4626770 | OA |

|                                |            |    |
|--------------------------------|------------|----|
| GSM4626770_GTTCATTAGGCCATAG-1  | GSM4626770 | OA |
| GSM4626770_GTTCATTATGCATGT-1   | GSM4626770 | OA |
| GSM4626770_GTTCATTGTGTGCTG-1   | GSM4626770 | OA |
| GSM4626770_GTTCATTGTTGGAGGT-1  | GSM4626770 | OA |
| GSM4626770_GTTCATTGTTGGGCC-1   | GSM4626770 | OA |
| GSM4626770_GTTCATTTCACTTATC-1  | GSM4626770 | OA |
| GSM4626770_GTTCATTTCCAACCAA-1  | GSM4626770 | OA |
| GSM4626770_GTTCATTTTCGTCACGG-1 | GSM4626770 | OA |
| GSM4626770_GTTCCGGCAAGTTGTC-1  | GSM4626770 | OA |
| GSM4626770_GTTCCGGCACATCTTT-1  | GSM4626770 | OA |
| GSM4626770_GTTCCGGGTAAATGTG-1  | GSM4626770 | OA |
| GSM4626770_GTTCCGGGTGTGAAAT-1  | GSM4626770 | OA |
| GSM4626770_GTTCCGGTCTGGTATG-1  | GSM4626770 | OA |
| GSM4626770_GTTCCGGTCTGTTGAG-1  | GSM4626770 | OA |
| GSM4626770_GTTCTCGGTATCTGCA-1  | GSM4626770 | OA |
| GSM4626770_GTTCTCGGTTGGTAAA-1  | GSM4626770 | OA |
| GSM4626770_GTTCTCGTCAGATAAG-1  | GSM4626770 | OA |
| GSM4626770_GTTCTCGTCGCACTCT-1  | GSM4626770 | OA |
| GSM4626770_GTTCTCGTCTATCCTA-1  | GSM4626770 | OA |
| GSM4626770_GTTTCTAAGAGTAATC-1  | GSM4626770 | OA |
| GSM4626770_GTTTCTAAGTGTCCCG-1  | GSM4626770 | OA |
| GSM4626770_GTTTCTACACAAGTAA-1  | GSM4626770 | OA |
| GSM4626770_GTTTCTATCCTGTAGA-1  | GSM4626770 | OA |
| GSM4626770_TAAACCGCATCGGGTC-1  | GSM4626770 | OA |
| GSM4626770_TAAACCGTCAACTCTT-1  | GSM4626770 | OA |
| GSM4626770_TAAACCGTCACCCGAG-1  | GSM4626770 | OA |
| GSM4626770_TAAACCGTCGGACAAG-1  | GSM4626770 | OA |
| GSM4626770_TAAGAGACATTAGGCT-1  | GSM4626770 | OA |
| GSM4626770_TAAGAGAGTAAACACA-1  | GSM4626770 | OA |
| GSM4626770_TAAGAGAGTCGCGGTT-1  | GSM4626770 | OA |
| GSM4626770_TAAGCGTAGACTACAA-1  | GSM4626770 | OA |
| GSM4626770_TAAGCGTAGGCAAAGA-1  | GSM4626770 | OA |
| GSM4626770_TAAGCGTGTGTTGAT-1   | GSM4626770 | OA |
| GSM4626770_TAAGCGTTCAGCACAT-1  | GSM4626770 | OA |
| GSM4626770_TAAGCGTTCGGTCAA-1   | GSM4626770 | OA |
| GSM4626770_TAAGCGTTCGGTTGTC-1  | GSM4626770 | OA |
| GSM4626770_TAAGCGTTCGTCATC-1   | GSM4626770 | OA |
| GSM4626770_TAAGTGCCAAGACGTG-1  | GSM4626770 | OA |
| GSM4626770_TAAGTGCCACAGATTC-1  | GSM4626770 | OA |
| GSM4626770_TAAGTGCCATTGCGGC-1  | GSM4626770 | OA |
| GSM4626770_TAAGTGCTTGGTGA-1    | GSM4626770 | OA |
| GSM4626770_TAAGTGCTCAAACAC-1   | GSM4626770 | OA |
| GSM4626770_TAAGTGCTCCATTTA-1   | GSM4626770 | OA |
| GSM4626770_TAAGTGCTCCTTTCTC-1  | GSM4626770 | OA |
| GSM4626770_TACACGAAGAACAATC-1  | GSM4626770 | OA |
| GSM4626770_TACACGAAGACTTGAA-1  | GSM4626770 | OA |
| GSM4626770_TACACGAAGGCATGGT-1  | GSM4626770 | OA |
| GSM4626770_TACACGAAGTGACACA-1  | GSM4626770 | OA |
| GSM4626770_TACACGACACAGGAGT-1  | GSM4626770 | OA |
| GSM4626770_TACACGACACGGTAAG-1  | GSM4626770 | OA |
| GSM4626770_TACACGACATGACATC-1  | GSM4626770 | OA |
| GSM4626770_TACACGACATGGGAAC-1  | GSM4626770 | OA |
| GSM4626770_TACACGACATTCTCG-1   | GSM4626770 | OA |
| GSM4626770_TACACGAGTAGAAAGG-1  | GSM4626770 | OA |
| GSM4626770_TACAGTGAGCTCCTTC-1  | GSM4626770 | OA |
| GSM4626770_TACAGTGACATTGGCC-1  | GSM4626770 | OA |
| GSM4626770_TACAGTGGTCAACTGT-1  | GSM4626770 | OA |

|                                |            |    |
|--------------------------------|------------|----|
| GSM4626770_TACAGTGTCGAATGGG-1  | GSM4626770 | OA |
| GSM4626770_TACAGTGTCGTCGTTTC-1 | GSM4626770 | OA |
| GSM4626770_TACCTATAGAAGGACA-1  | GSM4626770 | OA |
| GSM4626770_TACCTATAGATATACG-1  | GSM4626770 | OA |
| GSM4626770_TACCTATCAATCCAAC-1  | GSM4626770 | OA |
| GSM4626770_TACCTATCATCACCCCT-1 | GSM4626770 | OA |
| GSM4626770_TACCTATCATTCACTT-1  | GSM4626770 | OA |
| GSM4626770_TACCTATGTCAGATAA-1  | GSM4626770 | OA |
| GSM4626770_TACCTATTCAACGAAA-1  | GSM4626770 | OA |
| GSM4626770_TACCTATTCCCTTGTG-1  | GSM4626770 | OA |
| GSM4626770_TACCTATTCCGGATGTT-1 | GSM4626770 | OA |
| GSM4626770_TACCTTAAGAATTGTG-1  | GSM4626770 | OA |
| GSM4626770_TACCTTAAGTGTACTC-1  | GSM4626770 | OA |
| GSM4626770_TACCTTACAATAACAG-1  | GSM4626770 | OA |
| GSM4626770_TACCTTACACGGCTAC-1  | GSM4626770 | OA |
| GSM4626770_TACCTTACACTCAGGC-1  | GSM4626770 | OA |
| GSM4626770_TACCTTACAGGTTTCA-1  | GSM4626770 | OA |
| GSM4626770_TACCTTAGTCAGAATA-1  | GSM4626770 | OA |
| GSM4626770_TACCTTATCACGCATA-1  | GSM4626770 | OA |
| GSM4626770_TACCTTATCGTAGGAG-1  | GSM4626770 | OA |
| GSM4626770_TACGGATAGGAGTACC-1  | GSM4626770 | OA |
| GSM4626770_TACGGATAGGCTCAGA-1  | GSM4626770 | OA |
| GSM4626770_TACGGATTCAAACAAG-1  | GSM4626770 | OA |
| GSM4626770_TACGGATTACAGGCC-1   | GSM4626770 | OA |
| GSM4626770_TACGGATTCCAGGGCT-1  | GSM4626770 | OA |
| GSM4626770_TACGGATTCTCGTATT-1  | GSM4626770 | OA |
| GSM4626770_TACGGGCGTCCGGATCC-1 | GSM4626770 | OA |
| GSM4626770_TACGGGCGTGTGAAAT-1  | GSM4626770 | OA |
| GSM4626770_TACGGGCTCAACGGGA-1  | GSM4626770 | OA |
| GSM4626770_TACGGGCTCTATGTGG-1  | GSM4626770 | OA |
| GSM4626770_TACGGTAAGACCACGA-1  | GSM4626770 | OA |
| GSM4626770_TACGGTAAGCTGCGAA-1  | GSM4626770 | OA |
| GSM4626770_TACGGTACATTCCCTCG-1 | GSM4626770 | OA |
| GSM4626770_TACGGTATCCACGAAT-1  | GSM4626770 | OA |
| GSM4626770_TACGGTATCGTCTGAA-1  | GSM4626770 | OA |
| GSM4626770_TACGGTATCTAACTGG-1  | GSM4626770 | OA |
| GSM4626770_TACGGTATCTGCGACG-1  | GSM4626770 | OA |
| GSM4626770_TACTCATAGTGGCACA-1  | GSM4626770 | OA |
| GSM4626770_TACTCATAGTGGTGTG-1  | GSM4626770 | OA |
| GSM4626770_TACTCATAGTTGAGAT-1  | GSM4626770 | OA |
| GSM4626770_TACTCATCAAGCCGCT-1  | GSM4626770 | OA |
| GSM4626770_TACTCATCACCGATAT-1  | GSM4626770 | OA |
| GSM4626770_TACTCATCACTGTTAG-1  | GSM4626770 | OA |
| GSM4626770_TACTCATGTCTCGTTC-1  | GSM4626770 | OA |
| GSM4626770_TACTCATTCCCATTAT-1  | GSM4626770 | OA |
| GSM4626770_TACTCATTCGCGATCG-1  | GSM4626770 | OA |
| GSM4626770_TACTCGCAGATCGGGT-1  | GSM4626770 | OA |
| GSM4626770_TACTCGCAGTAGTGCG-1  | GSM4626770 | OA |
| GSM4626770_TACTCGCAGTGGAGAA-1  | GSM4626770 | OA |
| GSM4626770_TACTCGCCATCTGGTA-1  | GSM4626770 | OA |
| GSM4626770_TACTCGCGTGACTCAT-1  | GSM4626770 | OA |
| GSM4626770_TACTCGCTCAGAGCTT-1  | GSM4626770 | OA |
| GSM4626770_TACTCGCTCCGGGTGT-1  | GSM4626770 | OA |
| GSM4626770_TACTTACAGTATCTCG-1  | GSM4626770 | OA |
| GSM4626770_TACTTACAGTTTAGGA-1  | GSM4626770 | OA |
| GSM4626770_TACTTACCACTATCTT-1  | GSM4626770 | OA |
| GSM4626770_TACTTACCAGAGCCAA-1  | GSM4626770 | OA |

|                                 |            |    |
|---------------------------------|------------|----|
| GSM4626770_TACTTACCATACTACG-1   | GSM4626770 | OA |
| GSM4626770_TACTTACCATTTGCC-1    | GSM4626770 | OA |
| GSM4626770_TACTTACGTGTGAAAT-1   | GSM4626770 | OA |
| GSM4626770_TACTTGTAGATCTGAA-1   | GSM4626770 | OA |
| GSM4626770_TACTTGTGTCAGATAATG-1 | GSM4626770 | OA |
| GSM4626770_TACTTGTGCATGAAGTA-1  | GSM4626770 | OA |
| GSM4626770_TACTTGTGTGGAAAGA-1   | GSM4626770 | OA |
| GSM4626770_TACTTGTGTTACGGAG-1   | GSM4626770 | OA |
| GSM4626770_TACTTGTGTTTCGTTGA-1  | GSM4626770 | OA |
| GSM4626770_TACTTGTTCATGTGGT-1   | GSM4626770 | OA |
| GSM4626770_TAGACCAAGAAGGACA-1   | GSM4626770 | OA |
| GSM4626770_TAGACCAAGAGACTAT-1   | GSM4626770 | OA |
| GSM4626770_TAGACCAAGCAGATCG-1   | GSM4626770 | OA |
| GSM4626770_TAGACCAAGCTACCTA-1   | GSM4626770 | OA |
| GSM4626770_TAGACCACATGGTAGG-1   | GSM4626770 | OA |
| GSM4626770_TAGACCAGTAAGTGGC-1   | GSM4626770 | OA |
| GSM4626770_TAGACCAGTTAAAGTG-1   | GSM4626770 | OA |
| GSM4626770_TAGAGCTAGAATCTCC-1   | GSM4626770 | OA |
| GSM4626770_TAGAGCTAGGCTAGAC-1   | GSM4626770 | OA |
| GSM4626770_TAGAGCTCACACCGCA-1   | GSM4626770 | OA |
| GSM4626770_TAGAGCTTCATAACCG-1   | GSM4626770 | OA |
| GSM4626770_TAGAGCTTCCTAGGGC-1   | GSM4626770 | OA |
| GSM4626770_TAGAGCTTCTGTTGAG-1   | GSM4626770 | OA |
| GSM4626770_TAGCCGGAGCGCTCCA-1   | GSM4626770 | OA |
| GSM4626770_TAGCCGGAGGTTACCT-1   | GSM4626770 | OA |
| GSM4626770_TAGCCGGCAAATCCGT-1   | GSM4626770 | OA |
| GSM4626770_TAGCCGGCACATCCAA-1   | GSM4626770 | OA |
| GSM4626770_TAGCCGGCAGATAATG-1   | GSM4626770 | OA |
| GSM4626770_TAGCCGGGTGCAGACA-1   | GSM4626770 | OA |
| GSM4626770_TAGCCGGTCCGCAAGC-1   | GSM4626770 | OA |
| GSM4626770_TAGCCGGTCGATCCCT-1   | GSM4626770 | OA |
| GSM4626770_TAGCCGGTCTCCTATA-1   | GSM4626770 | OA |
| GSM4626770_TAGGCATGTTAAAGTG-1   | GSM4626770 | OA |
| GSM4626770_TAGTGGTAGTGGGTTG-1   | GSM4626770 | OA |
| GSM4626770_TAGTGGTCAGCTTAAC-1   | GSM4626770 | OA |
| GSM4626770_TAGTGGTGTTCCTTG-1    | GSM4626770 | OA |
| GSM4626770_TAGTGGTGTGGAGGT-1    | GSM4626770 | OA |
| GSM4626770_TAGTGGTTCATAGCAC-1   | GSM4626770 | OA |
| GSM4626770_TAGTGGTTCATTTGGG-1   | GSM4626770 | OA |
| GSM4626770_TAGTGGTTCCTCGCAT-1   | GSM4626770 | OA |
| GSM4626770_TAGTTGGCAATAGCGG-1   | GSM4626770 | OA |
| GSM4626770_TAGTTGGCATGTCAT-1    | GSM4626770 | OA |
| GSM4626770_TAGTTGGGTATGAAAC-1   | GSM4626770 | OA |
| GSM4626770_TAGTTGGTCTCGTTTA-1   | GSM4626770 | OA |
| GSM4626770_TATCAGGGTCGCGAAA-1   | GSM4626770 | OA |
| GSM4626770_TATCAGGTCGCTGATA-1   | GSM4626770 | OA |
| GSM4626770_TATCTCACAAACCTAC-1   | GSM4626770 | OA |
| GSM4626770_TATCTCACAGCGTAAG-1   | GSM4626770 | OA |
| GSM4626770_TATCTCAGTCTAAACC-1   | GSM4626770 | OA |
| GSM4626770_TATCTCATCCGGCACA-1   | GSM4626770 | OA |
| GSM4626770_TATGCCCAGAATTCCC-1   | GSM4626770 | OA |
| GSM4626770_TATGCCCAGGTGATTA-1   | GSM4626770 | OA |
| GSM4626770_TATGCCCAGTACGCGA-1   | GSM4626770 | OA |
| GSM4626770_TATGCCCGTCTCCACT-1   | GSM4626770 | OA |
| GSM4626770_TATGCCCTCGAGGTAG-1   | GSM4626770 | OA |
| GSM4626770_TATTACCAGTCATGCT-1   | GSM4626770 | OA |
| GSM4626770_TATTACCAAGGACAC-1    | GSM4626770 | OA |

|                               |            |    |
|-------------------------------|------------|----|
| GSM4626770_TATTACCCACATAACC-1 | GSM4626770 | OA |
| GSM4626770_TATTACCCACGTAAGG-1 | GSM4626770 | OA |
| GSM4626770_TATTACCGTAAGAGAG-1 | GSM4626770 | OA |
| GSM4626770_TATTACCGTCTAGCGC-1 | GSM4626770 | OA |
| GSM4626770_TATTACCTCAACGAAA-1 | GSM4626770 | OA |
| GSM4626770_TATTACCTCAGCAACT-1 | GSM4626770 | OA |
| GSM4626770_TATTACCTCCAAACAC-1 | GSM4626770 | OA |
| GSM4626770_TATTACCTCGTTGACA-1 | GSM4626770 | OA |
| GSM4626770_TCAACGAAGCGATCCC-1 | GSM4626770 | OA |
| GSM4626770_TCAACGACACCGCTAG-1 | GSM4626770 | OA |
| GSM4626770_TCAACGACATGCTAGT-1 | GSM4626770 | OA |
| GSM4626770_TCAACGAGTCACTGGC-1 | GSM4626770 | OA |
| GSM4626770_TCAACGATCAACGCTA-1 | GSM4626770 | OA |
| GSM4626770_TCAACGATCAATCACG-1 | GSM4626770 | OA |
| GSM4626770_TCAACGATCGGAGCAA-1 | GSM4626770 | OA |
| GSM4626770_TCAATCTAGACAGGCT-1 | GSM4626770 | OA |
| GSM4626770_TCAATCTAGAGCTATA-1 | GSM4626770 | OA |
| GSM4626770_TCAATCTCAACGATGG-1 | GSM4626770 | OA |
| GSM4626770_TCAATCTCACGGTTTA-1 | GSM4626770 | OA |
| GSM4626770_TCAATCTCAGCGAACA-1 | GSM4626770 | OA |
| GSM4626770_TCAATCTCAGCTGTGC-1 | GSM4626770 | OA |
| GSM4626770_TCAATCTGTACCGCTG-1 | GSM4626770 | OA |
| GSM4626770_TCAATCTGTGTCGCTG-1 | GSM4626770 | OA |
| GSM4626770_TCAATCTGTTACAGAA-1 | GSM4626770 | OA |
| GSM4626770_TCAATCTTCGTTTAGG-1 | GSM4626770 | OA |
| GSM4626770_TCACAAGAGCCAACAG-1 | GSM4626770 | OA |
| GSM4626770_TCACAAGAGGCCCTTG-1 | GSM4626770 | OA |
| GSM4626770_TCACAAGAGTGTACCT-1 | GSM4626770 | OA |
| GSM4626770_TCACAAGCATCGGTTA-1 | GSM4626770 | OA |
| GSM4626770_TCACAAGGTAGCGCAA-1 | GSM4626770 | OA |
| GSM4626770_TCACAAGTCACCAGGC-1 | GSM4626770 | OA |
| GSM4626770_TCACAAGTCCAGATCA-1 | GSM4626770 | OA |
| GSM4626770_TCACAAGTCCTGCTTG-1 | GSM4626770 | OA |
| GSM4626770_TCACGAAAGAATAGGG-1 | GSM4626770 | OA |
| GSM4626770_TCACGAAAGTTGTAGA-1 | GSM4626770 | OA |
| GSM4626770_TCACGAACACACGCTG-1 | GSM4626770 | OA |
| GSM4626770_TCACGAACATCACCT-1  | GSM4626770 | OA |
| GSM4626770_TCACGAACATGCCTAA-1 | GSM4626770 | OA |
| GSM4626770_TCACGAAGTACCGGCT-1 | GSM4626770 | OA |
| GSM4626770_TCACGAAGTCTCCATC-1 | GSM4626770 | OA |
| GSM4626770_TCAGATGAGGGTATCG-1 | GSM4626770 | OA |
| GSM4626770_TCAGATGAGGTTACCT-1 | GSM4626770 | OA |
| GSM4626770_TCAGATGCATCCATC-1  | GSM4626770 | OA |
| GSM4626770_TCAGATGGTACGCTGC-1 | GSM4626770 | OA |
| GSM4626770_TCAGATGGTCAGAGGT-1 | GSM4626770 | OA |
| GSM4626770_TCAGATGGTCAGGACA-1 | GSM4626770 | OA |
| GSM4626770_TCAGATGGTGCCTGTG-1 | GSM4626770 | OA |
| GSM4626770_TCAGATGGTTTACTCT-1 | GSM4626770 | OA |
| GSM4626770_TCAGCAAAGAGCTTCT-1 | GSM4626770 | OA |
| GSM4626770_TCAGCAACAACAACCT-1 | GSM4626770 | OA |
| GSM4626770_TCAGCAACACCTATCC-1 | GSM4626770 | OA |
| GSM4626770_TCAGCAACACGAGAGT-1 | GSM4626770 | OA |
| GSM4626770_TCAGCAAGTCCTAGCG-1 | GSM4626770 | OA |
| GSM4626770_TCAGCTCAGAACAATC-1 | GSM4626770 | OA |
| GSM4626770_TCAGCTCAGCGTGAGT-1 | GSM4626770 | OA |
| GSM4626770_TCAGCTCAGGGCATGT-1 | GSM4626770 | OA |
| GSM4626770_TCAGCTCAGGTGTAA-1  | GSM4626770 | OA |

|                                |            |    |
|--------------------------------|------------|----|
| GSM4626770_TCAGCTCAGTACGATA-1  | GSM4626770 | OA |
| GSM4626770_TCAGCTCAGTTGTCGT-1  | GSM4626770 | OA |
| GSM4626770_TCAGCTCAGTTTCCTT-1  | GSM4626770 | OA |
| GSM4626770_TCAGCTCGTCCCGACA-1  | GSM4626770 | OA |
| GSM4626770_TCAGCTCGTCTCCCTA-1  | GSM4626770 | OA |
| GSM4626770_TCAGCTCGTGTTTGGT-1  | GSM4626770 | OA |
| GSM4626770_TCAGCTCTCTTTCCTC-1  | GSM4626770 | OA |
| GSM4626770_TCAGGATAGTGAATTG-1  | GSM4626770 | OA |
| GSM4626770_TCAGGATCACGCATCG-1  | GSM4626770 | OA |
| GSM4626770_TCAGGATCAGCATACT-1  | GSM4626770 | OA |
| GSM4626770_TCAGGATCATCACCT-1   | GSM4626770 | OA |
| GSM4626770_TCAGGATCATGCAATC-1  | GSM4626770 | OA |
| GSM4626770_TCAGGATGTAAAGAC-1   | GSM4626770 | OA |
| GSM4626770_TCAGGTACATCATCCC-1  | GSM4626770 | OA |
| GSM4626770_TCAGGTACATTCTTAC-1  | GSM4626770 | OA |
| GSM4626770_TCAGGTAGTCTCAACA-1  | GSM4626770 | OA |
| GSM4626770_TCATTACAGCGACGTA-1  | GSM4626770 | OA |
| GSM4626770_TCATTACAGCTAGTCT-1  | GSM4626770 | OA |
| GSM4626770_TCATTACAGTTAAGTG-1  | GSM4626770 | OA |
| GSM4626770_TCATTACCAATAGAGT-1  | GSM4626770 | OA |
| GSM4626770_TCATTACCAGGACCCT-1  | GSM4626770 | OA |
| GSM4626770_TCATTACCATCAGTCA-1  | GSM4626770 | OA |
| GSM4626770_TCATTACGTACTCGCG-1  | GSM4626770 | OA |
| GSM4626770_TCATTACGTGGCGAAT-1  | GSM4626770 | OA |
| GSM4626770_TCATTACTCCTCATT-1   | GSM4626770 | OA |
| GSM4626770_TCATTACTCGTACCGG-1  | GSM4626770 | OA |
| GSM4626770_TCATTTGAGTATGACA-1  | GSM4626770 | OA |
| GSM4626770_TCATTTGCAGATAATG-1  | GSM4626770 | OA |
| GSM4626770_TCATTTGCAGTAAGAT-1  | GSM4626770 | OA |
| GSM4626770_TCATTTGCATAGTAAG-1  | GSM4626770 | OA |
| GSM4626770_TCATTTGCATCTATGG-1  | GSM4626770 | OA |
| GSM4626770_TCATTTGCATTTGCTT-1  | GSM4626770 | OA |
| GSM4626770_TCATTTGGTATAGGTA-1  | GSM4626770 | OA |
| GSM4626770_TCATTTGGTCTAAACC-1  | GSM4626770 | OA |
| GSM4626770_TCATTTGTCTACGAGT-1  | GSM4626770 | OA |
| GSM4626770_TCATTTGTCTCTGTGCG-1 | GSM4626770 | OA |
| GSM4626770_TCATTTGTCTTGCAAG-1  | GSM4626770 | OA |
| GSM4626770_TCCACACAGTAAGTAC-1  | GSM4626770 | OA |
| GSM4626770_TCCACACAGTGCCATT-1  | GSM4626770 | OA |
| GSM4626770_TCCACACCATCAGTCA-1  | GSM4626770 | OA |
| GSM4626770_TCCCGATAGGTGTGGT-1  | GSM4626770 | OA |
| GSM4626770_TCCCGATAGTAGATGT-1  | GSM4626770 | OA |
| GSM4626770_TCCCGATGTGCGGGTT-1  | GSM4626770 | OA |
| GSM4626770_TCCCGATGTGTTAAGA-1  | GSM4626770 | OA |
| GSM4626770_TCGAGGCAGGCAAAGA-1  | GSM4626770 | OA |
| GSM4626770_TCGAGGCAGTACGCC-1   | GSM4626770 | OA |
| GSM4626770_TCGAGGCCAAACGCGA-1  | GSM4626770 | OA |
| GSM4626770_TCGAGGCCAGCCAATT-1  | GSM4626770 | OA |
| GSM4626770_TCGAGGCGTAACGACG-1  | GSM4626770 | OA |
| GSM4626770_TCGCGAGCACCAGCAC-1  | GSM4626770 | OA |
| GSM4626770_TCGCGAGTCGTCCAGG-1  | GSM4626770 | OA |
| GSM4626770_TCGCGAGTCTGGCGAC-1  | GSM4626770 | OA |
| GSM4626770_TCGCGTTAGCTAGCCC-1  | GSM4626770 | OA |
| GSM4626770_TCGCGTTAGGACAGAA-1  | GSM4626770 | OA |
| GSM4626770_TCGCGTTGTAGAAGGA-1  | GSM4626770 | OA |
| GSM4626770_TCGCGTTTCCATTCTA-1  | GSM4626770 | OA |
| GSM4626770_TCGCGTTTCGCTGTT-1   | GSM4626770 | OA |

|                               |            |    |
|-------------------------------|------------|----|
| GSM4626770_TCGCGTTTCGCTTGTC-1 | GSM4626770 | OA |
| GSM4626770_TCGGGACAGACCTAGG-1 | GSM4626770 | OA |
| GSM4626770_TCGGGACAGCATGGCA-1 | GSM4626770 | OA |
| GSM4626770_TCGGGACCACCAGCAC-1 | GSM4626770 | OA |
| GSM4626770_TCGGGACCAGCGTAAG-1 | GSM4626770 | OA |
| GSM4626770_TCGGGACCATCGGGTC-1 | GSM4626770 | OA |
| GSM4626770_TCGGGACGTACCGTTA-1 | GSM4626770 | OA |
| GSM4626770_TCGGGACGTGACGGTA-1 | GSM4626770 | OA |
| GSM4626770_TCGGGACTCTTCTGGC-1 | GSM4626770 | OA |
| GSM4626770_TCGGTAAAGAACAATC-1 | GSM4626770 | OA |
| GSM4626770_TCGGTAAAGGCTATCT-1 | GSM4626770 | OA |
| GSM4626770_TCGGTAACACGAGGTA-1 | GSM4626770 | OA |
| GSM4626770_TCGGTAAGTAATCGTC-1 | GSM4626770 | OA |
| GSM4626770_TCGGTAAGTTGAACTC-1 | GSM4626770 | OA |
| GSM4626770_TCGGTAATCAAACGGG-1 | GSM4626770 | OA |
| GSM4626770_TCGGTAATCAGGTTCA-1 | GSM4626770 | OA |
| GSM4626770_TCGGTAATCCCACTTG-1 | GSM4626770 | OA |
| GSM4626770_TCGTACCAGACAAAGG-1 | GSM4626770 | OA |
| GSM4626770_TCGTACCCAAACGTGG-1 | GSM4626770 | OA |
| GSM4626770_TCGTACCCAAGTTGTC-1 | GSM4626770 | OA |
| GSM4626770_TCGTACCCAGTCGTGC-1 | GSM4626770 | OA |
| GSM4626770_TCGTACCGTAGGACAC-1 | GSM4626770 | OA |
| GSM4626770_TCGTACCGTGAAATCA-1 | GSM4626770 | OA |
| GSM4626770_TCGTACCGTTTACTCT-1 | GSM4626770 | OA |
| GSM4626770_TCGTACCTCACATACG-1 | GSM4626770 | OA |
| GSM4626770_TCGTACCTCCAGAAGG-1 | GSM4626770 | OA |
| GSM4626770_TCGTAGAAGACCACGA-1 | GSM4626770 | OA |
| GSM4626770_TCGTAGACATCCCATC-1 | GSM4626770 | OA |
| GSM4626770_TCGTAGAGTAATTGGA-1 | GSM4626770 | OA |
| GSM4626770_TCGTAGAGTCCGTTAA-1 | GSM4626770 | OA |
| GSM4626770_TCGTAGAGTCTTCTCG-1 | GSM4626770 | OA |
| GSM4626770_TCGTAGAGTTGAACTC-1 | GSM4626770 | OA |
| GSM4626770_TCGTAGATCGACGAA-1  | GSM4626770 | OA |
| GSM4626770_TCGTAGATCGTCGTTT-1 | GSM4626770 | OA |
| GSM4626770_TCGTAGATCTGTCCGT-1 | GSM4626770 | OA |
| GSM4626770_TCTATTGAGATAGGAG-1 | GSM4626770 | OA |
| GSM4626770_TCTATTGGTAAGGGCT-1 | GSM4626770 | OA |
| GSM4626770_TCTATTGGTGAAGGCT-1 | GSM4626770 | OA |
| GSM4626770_TCTATTGTCCCTTGCA-1 | GSM4626770 | OA |
| GSM4626770_TCTATAAGAAGGCCCT-1 | GSM4626770 | OA |
| GSM4626770_TCTATAAGAATTCCC-1  | GSM4626770 | OA |
| GSM4626770_TCTCATAGTATTCGTG-1 | GSM4626770 | OA |
| GSM4626770_TCTCATATCCTGCTTG-1 | GSM4626770 | OA |
| GSM4626770_TCTCTAAAGAGACGAA-1 | GSM4626770 | OA |
| GSM4626770_TCTCTAAAGAGTACAT-1 | GSM4626770 | OA |
| GSM4626770_TCTCTAACACATTAGC-1 | GSM4626770 | OA |
| GSM4626770_TCTCTAACACCGCTAG-1 | GSM4626770 | OA |
| GSM4626770_TCTCTAACAGACGCAA-1 | GSM4626770 | OA |
| GSM4626770_TCTCTAACATCGACGC-1 | GSM4626770 | OA |
| GSM4626770_TCTCTAATCAAAGTAG-1 | GSM4626770 | OA |
| GSM4626770_TCTGAGAAGTGCTGCC-1 | GSM4626770 | OA |
| GSM4626770_TCTGAGACAAGCGAGT-1 | GSM4626770 | OA |
| GSM4626770_TCTGAGACAATAGCGG-1 | GSM4626770 | OA |
| GSM4626770_TCTGAGACATCCCACT-1 | GSM4626770 | OA |
| GSM4626770_TCTGAGAGTAAATGTG-1 | GSM4626770 | OA |
| GSM4626770_TCTGAGAGTACCCAAT-1 | GSM4626770 | OA |
| GSM4626770_TCTGGAAAGTCGATAA-1 | GSM4626770 | OA |



|                                |            |    |
|--------------------------------|------------|----|
| GSM4626770_TCTGGAATCGTACCGG-1  | GSM4626770 | OA |
| GSM4626770_TCTTCGGAGCGTGAGT-1  | GSM4626770 | OA |
| GSM4626770_TCTTCGGAGCTAAGAT-1  | GSM4626770 | OA |
| GSM4626770_TCTTCGGAGTCGTTTG-1  | GSM4626770 | OA |
| GSM4626770_TCTTCGGCACCTCGGA-1  | GSM4626770 | OA |
| GSM4626770_TCTTCGGCAGGGTACA-1  | GSM4626770 | OA |
| GSM4626770_TCTTCGGCATGGTAGG-1  | GSM4626770 | OA |
| GSM4626770_TCTTCGGGTCAAAGAT-1  | GSM4626770 | OA |
| GSM4626770_TCTTCGGTCACTTACT-1  | GSM4626770 | OA |
| GSM4626770_TCTTCGGTCCAAATGC-1  | GSM4626770 | OA |
| GSM4626770_TCTTCGGTCCCGACTT-1  | GSM4626770 | OA |
| GSM4626770_TCTTCGGTCCTCCTAG-1  | GSM4626770 | OA |
| GSM4626770_TCTTCGGTCGATAGAA-1  | GSM4626770 | OA |
| GSM4626770_TCTTCGGTCTAACTGG-1  | GSM4626770 | OA |
| GSM4626770_TCTTCGGTCTGTACGA-1  | GSM4626770 | OA |
| GSM4626770_TCTTCGGTCTTGACGA-1  | GSM4626770 | OA |
| GSM4626770_TCTTTCCCAACTGGCC-1  | GSM4626770 | OA |
| GSM4626770_TCTTTCCCACGACTCG-1  | GSM4626770 | OA |
| GSM4626770_TCTTTCCCAGACGCCT-1  | GSM4626770 | OA |
| GSM4626770_TCTTTCCCATGCAACT-1  | GSM4626770 | OA |
| GSM4626770_TCTTTCCCATTCTACT-1  | GSM4626770 | OA |
| GSM4626770_TCTTTCCGTCATCCCT-1  | GSM4626770 | OA |
| GSM4626770_TCTTTCCGTGATGTGG-1  | GSM4626770 | OA |
| GSM4626770_TGAAAGAAGAGACGAA-1  | GSM4626770 | OA |
| GSM4626770_TGAAAGAAGCGATCCC-1  | GSM4626770 | OA |
| GSM4626770_TGAAAGACACTTGGAT-1  | GSM4626770 | OA |
| GSM4626770_TGAAAGAGTCTTTTA-1   | GSM4626770 | OA |
| GSM4626770_TGAAAGAGTGCCTGTG-1  | GSM4626770 | OA |
| GSM4626770_TGACAACAGATCCCGC-1  | GSM4626770 | OA |
| GSM4626770_TGACAACAGGGCACTA-1  | GSM4626770 | OA |
| GSM4626770_TGACAACCATGAACCT-1  | GSM4626770 | OA |
| GSM4626770_TGACAACGTCGTTGTA-1  | GSM4626770 | OA |
| GSM4626770_TGACAACGTCTAGCCG-1  | GSM4626770 | OA |
| GSM4626770_TGACAACCTCAACCAAC-1 | GSM4626770 | OA |
| GSM4626770_TGACAACCTCATACGGT-1 | GSM4626770 | OA |
| GSM4626770_TGACAACCTCGACGAA-1  | GSM4626770 | OA |
| GSM4626770_TGACGGCAGTCAAGCG-1  | GSM4626770 | OA |
| GSM4626770_TGACGGCCATTCTCAT-1  | GSM4626770 | OA |
| GSM4626770_TGACGGCGTCACCTAA-1  | GSM4626770 | OA |
| GSM4626770_TGACGGCTCAGATAAG-1  | GSM4626770 | OA |
| GSM4626770_TGACGGCTCAGCTTAG-1  | GSM4626770 | OA |
| GSM4626770_TGACGGCTCGCAGGCT-1  | GSM4626770 | OA |
| GSM4626770_TGACGGCTCTGCAAGT-1  | GSM4626770 | OA |
| GSM4626770_TGACTAGAGCTGCGAA-1  | GSM4626770 | OA |
| GSM4626770_TGACTAGCAAGTAATG-1  | GSM4626770 | OA |
| GSM4626770_TGACTAGCAATAGCAA-1  | GSM4626770 | OA |
| GSM4626770_TGACTAGCAGAAGCAC-1  | GSM4626770 | OA |
| GSM4626770_TGACTAGCAGATGGGT-1  | GSM4626770 | OA |
| GSM4626770_TGACTAGCAGGAATCG-1  | GSM4626770 | OA |
| GSM4626770_TGACTAGCATGGAATA-1  | GSM4626770 | OA |
| GSM4626770_TGACTAGGTGACGGTA-1  | GSM4626770 | OA |
| GSM4626770_TGACTAGGTTTGTTGG-1  | GSM4626770 | OA |
| GSM4626770_TGACTAGTCATAAAGG-1  | GSM4626770 | OA |
| GSM4626770_TGACTAGTCATAACCG-1  | GSM4626770 | OA |
| GSM4626770_TGACTAGTCCTCCTAG-1  | GSM4626770 | OA |
| GSM4626770_TGACTAGTCTGTCTAT-1  | GSM4626770 | OA |
| GSM4626770_TGACTTTAGCTCCTCT-1  | GSM4626770 | OA |

|                                 |            |    |
|---------------------------------|------------|----|
| GSM4626770_TGACTTTAGTGCAAGC-1   | GSM4626770 | OA |
| GSM4626770_TGACTTTCAGGAATCG-1   | GSM4626770 | OA |
| GSM4626770_TGACTTTGTAGAGTGC-1   | GSM4626770 | OA |
| GSM4626770_TGACTTTGTCTAGCCG-1   | GSM4626770 | OA |
| GSM4626770_TGACTTTGTGGTACAG-1   | GSM4626770 | OA |
| GSM4626770_TGACTTTGTGGTTTCA-1   | GSM4626770 | OA |
| GSM4626770_TGACTTTGTTACCAGT-1   | GSM4626770 | OA |
| GSM4626770_TGACTTTGTTCTGCTC-1   | GSM4626770 | OA |
| GSM4626770_TGACTTTTCCTACAGA-1   | GSM4626770 | OA |
| GSM4626770_TGACTTTTCGCATGAT-1   | GSM4626770 | OA |
| GSM4626770_TGACTTTTCGTTTGCC-1   | GSM4626770 | OA |
| GSM4626770_TGACTTTTCTCAAACG-1   | GSM4626770 | OA |
| GSM4626770_TGAGAGGAGACTGGGT-1   | GSM4626770 | OA |
| GSM4626770_TGAGAGGAGGCTATCT-1   | GSM4626770 | OA |
| GSM4626770_TGAGAGGCAAATACAG-1   | GSM4626770 | OA |
| GSM4626770_TGAGAGGCAACAACCT-1   | GSM4626770 | OA |
| GSM4626770_TGAGAGGCATACGCCG-1   | GSM4626770 | OA |
| GSM4626770_TGAGAGGGTGGCAAAC-1   | GSM4626770 | OA |
| GSM4626770_TGAGAGGTCAGATAAG-1   | GSM4626770 | OA |
| GSM4626770_TGAGAGGTCGTTACGA-1   | GSM4626770 | OA |
| GSM4626770_TGAGCATAGAAACCTA-1   | GSM4626770 | OA |
| GSM4626770_TGAGCATAGATGTGGC-1   | GSM4626770 | OA |
| GSM4626770_TGAGCATAGTAGCGGT-1   | GSM4626770 | OA |
| GSM4626770_TGAGCATCACCAACCG-1   | GSM4626770 | OA |
| GSM4626770_TGAGCATGTCTACCTC-1   | GSM4626770 | OA |
| GSM4626770_TGAGCATGTTCTGCTC-1   | GSM4626770 | OA |
| GSM4626770_TGAGCATTACCCCTCA-1   | GSM4626770 | OA |
| GSM4626770_TGAGCCGAGCAGCCTC-1   | GSM4626770 | OA |
| GSM4626770_TGAGCCGAGCGTTGCC-1   | GSM4626770 | OA |
| GSM4626770_TGAGCCGCAAATACAG-1   | GSM4626770 | OA |
| GSM4626770_TGAGCCGGTTCGTGAT-1   | GSM4626770 | OA |
| GSM4626770_TGAGCCGGTGTACAC-1    | GSM4626770 | OA |
| GSM4626770_TGAGGGAAGATGGCGT-1   | GSM4626770 | OA |
| GSM4626770_TGAGGGAAGCGTTGCC-1   | GSM4626770 | OA |
| GSM4626770_TGAGGGAAGGCCATAG-1   | GSM4626770 | OA |
| GSM4626770_TGAGGGAAGTTCGCGC-1   | GSM4626770 | OA |
| GSM4626770_TGAGGGACAAGTAGTA-1   | GSM4626770 | OA |
| GSM4626770_TGAGGGAGTGTTGGGA-1   | GSM4626770 | OA |
| GSM4626770_TGAGGGATCCATGAAC-1   | GSM4626770 | OA |
| GSM4626770_TGATTTCCAACCTGAC-1   | GSM4626770 | OA |
| GSM4626770_TGATTTTCGTTCGATTGT-1 | GSM4626770 | OA |
| GSM4626770_TGATTTTCGTTCGCATC-1  | GSM4626770 | OA |
| GSM4626770_TGATTTTCGTTCGCTGGT-1 | GSM4626770 | OA |
| GSM4626770_TGATTTTCGTTCGAAAGA-1 | GSM4626770 | OA |
| GSM4626770_TGATTTTCGTTACCGAT-1  | GSM4626770 | OA |
| GSM4626770_TGATTTCTCAAGGTAA-1   | GSM4626770 | OA |
| GSM4626770_TGATTTCTCGCATGAT-1   | GSM4626770 | OA |
| GSM4626770_TGATTTCTCGGAGCAA-1   | GSM4626770 | OA |
| GSM4626770_TGCACCTAGCACGCCT-1   | GSM4626770 | OA |
| GSM4626770_TGCACCTCAGCCTTGG-1   | GSM4626770 | OA |
| GSM4626770_TGCACCTGTCAGAGGT-1   | GSM4626770 | OA |
| GSM4626770_TGCACCTGTGCCTGTG-1   | GSM4626770 | OA |
| GSM4626770_TGCACCTGTTTGTTC-1    | GSM4626770 | OA |
| GSM4626770_TGCACCTTCCACGAAT-1   | GSM4626770 | OA |
| GSM4626770_TGCCAAACAAGTAGTA-1   | GSM4626770 | OA |
| GSM4626770_TGCCAAAGTAGTAGTA-1   | GSM4626770 | OA |
| GSM4626770_TGCCAAAGTCTAAAGA-1   | GSM4626770 | OA |

|                                |            |    |
|--------------------------------|------------|----|
| GSM4626770_TGCCAAAGTCTTGCGG-1  | GSM4626770 | OA |
| GSM4626770_TGCCAAAGTGACTACT-1  | GSM4626770 | OA |
| GSM4626770_TGCCAAATCAGTCAGT-1  | GSM4626770 | OA |
| GSM4626770_TGCCCATAGCCTATGT-1  | GSM4626770 | OA |
| GSM4626770_TGCCCATAGCTACCGC-1  | GSM4626770 | OA |
| GSM4626770_TGCCCATAGTAGGTGC-1  | GSM4626770 | OA |
| GSM4626770_TGCCCATCACACAGAG-1  | GSM4626770 | OA |
| GSM4626770_TGCCCATGTGCGGTAA-1  | GSM4626770 | OA |
| GSM4626770_TGCCCTAAGAGTTGGC-1  | GSM4626770 | OA |
| GSM4626770_TGCCCTAAGTCTCGGC-1  | GSM4626770 | OA |
| GSM4626770_TGCCCTACAGACGTAG-1  | GSM4626770 | OA |
| GSM4626770_TGCCCTACAGTAGAGC-1  | GSM4626770 | OA |
| GSM4626770_TGCCCTACAGTCAGCC-1  | GSM4626770 | OA |
| GSM4626770_TGCCCTACATACGCTA-1  | GSM4626770 | OA |
| GSM4626770_TGCCCTAGTCCTAGCG-1  | GSM4626770 | OA |
| GSM4626770_TGCCCTAGTCGCATCG-1  | GSM4626770 | OA |
| GSM4626770_TGCCCTATCATGCTCC-1  | GSM4626770 | OA |
| GSM4626770_TGCGCAGAGCAAATCA-1  | GSM4626770 | OA |
| GSM4626770_TGCGCAGAGGGTCGAT-1  | GSM4626770 | OA |
| GSM4626770_TGCGCAGCAGCGTCCA-1  | GSM4626770 | OA |
| GSM4626770_TGCGCAGCAGTCCTTC-1  | GSM4626770 | OA |
| GSM4626770_TGCGCAGCATAACAGCT-1 | GSM4626770 | OA |
| GSM4626770_TGCGCAGGTGTTAAGA-1  | GSM4626770 | OA |
| GSM4626770_TGCGCAGGTTGTGGAG-1  | GSM4626770 | OA |
| GSM4626770_TGCGCAGTCCGCGGTA-1  | GSM4626770 | OA |
| GSM4626770_TGCGGGTAGGAGTTTA-1  | GSM4626770 | OA |
| GSM4626770_TGCGGGTAGGCTACGA-1  | GSM4626770 | OA |
| GSM4626770_TGCGGGTCAAGCCAC-1   | GSM4626770 | OA |
| GSM4626770_TGCGGGTCATGCCTTC-1  | GSM4626770 | OA |
| GSM4626770_TGCGGGTGTTACGCGC-1  | GSM4626770 | OA |
| GSM4626770_TGCGGGTTCATGCATG-1  | GSM4626770 | OA |
| GSM4626770_TGCGGGTTCCTTATG-1   | GSM4626770 | OA |
| GSM4626770_TGCGGGTTCGCCCTA-1   | GSM4626770 | OA |
| GSM4626770_TGCGTGAGGAATTAC-1   | GSM4626770 | OA |
| GSM4626770_TGCGTGAGGTGGGTTG-1  | GSM4626770 | OA |
| GSM4626770_TGCGTGAGGTGGTAGC-1  | GSM4626770 | OA |
| GSM4626770_TGCGTGGAATACGCT-1   | GSM4626770 | OA |
| GSM4626770_TGCGTGGCAGCTGTTA-1  | GSM4626770 | OA |
| GSM4626770_TGCGTGGTCTACCTGC-1  | GSM4626770 | OA |
| GSM4626770_TGCTACCTCCACGAAT-1  | GSM4626770 | OA |
| GSM4626770_TGCTACCTCGACGAA-1   | GSM4626770 | OA |
| GSM4626770_TGCTACCTCTGGCGTG-1  | GSM4626770 | OA |
| GSM4626770_TGCTGCTACCAGATT-1   | GSM4626770 | OA |
| GSM4626770_TGCTGCTCACGCGAAA-1  | GSM4626770 | OA |
| GSM4626770_TGCTGCTCAGATCTGT-1  | GSM4626770 | OA |
| GSM4626770_TGCTGCTGTAATTGGA-1  | GSM4626770 | OA |
| GSM4626770_TGCTGCTGTCCGAAGA-1  | GSM4626770 | OA |
| GSM4626770_TGCTGCTTCATTATCC-1  | GSM4626770 | OA |
| GSM4626770_TGGACGCAGACGCAAC-1  | GSM4626770 | OA |
| GSM4626770_TGGACGCAGACTAAGT-1  | GSM4626770 | OA |
| GSM4626770_TGGACGCCAATAGCAA-1  | GSM4626770 | OA |
| GSM4626770_TGGACGCCATGTCTCC-1  | GSM4626770 | OA |
| GSM4626770_TGGACGCGTCAAACCTC-1 | GSM4626770 | OA |
| GSM4626770_TGGACGCGTCTTCAAG-1  | GSM4626770 | OA |
| GSM4626770_TGGACGCTCCATTCTA-1  | GSM4626770 | OA |
| GSM4626770_TGGACGCTCGTACCGG-1  | GSM4626770 | OA |
| GSM4626770_TGGCCAGCATCGATTG-1  | GSM4626770 | OA |

|                                |            |    |
|--------------------------------|------------|----|
| GSM4626770_TGGCCAGGTACAGACG-1  | GSM4626770 | OA |
| GSM4626770_TGGCCAGGTTTCCACC-1  | GSM4626770 | OA |
| GSM4626770_TGGCCAGTCATATCGG-1  | GSM4626770 | OA |
| GSM4626770_TGGCGCAAGCTGAAAT-1  | GSM4626770 | OA |
| GSM4626770_TGGCGCAAGTTTAGGA-1  | GSM4626770 | OA |
| GSM4626770_TGGCGCACAAATCACAC-1 | GSM4626770 | OA |
| GSM4626770_TGGCGCACAGATAATG-1  | GSM4626770 | OA |
| GSM4626770_TGGCGCAGTGTGAATA-1  | GSM4626770 | OA |
| GSM4626770_TGGCGCATCCGCTGTT-1  | GSM4626770 | OA |
| GSM4626770_TGGCTGGAGAGCTTCT-1  | GSM4626770 | OA |
| GSM4626770_TGGCTGGCAAGCCATT-1  | GSM4626770 | OA |
| GSM4626770_TGGCTGGCAATCCAAC-1  | GSM4626770 | OA |
| GSM4626770_TGGCTGGCACCGATAT-1  | GSM4626770 | OA |
| GSM4626770_TGGCTGGGTCTGCCAG-1  | GSM4626770 | OA |
| GSM4626770_TGGGAAGAGGTGTGGT-1  | GSM4626770 | OA |
| GSM4626770_TGGGAAGAGTGAACAT-1  | GSM4626770 | OA |
| GSM4626770_TGGGAAGCACTCAGGC-1  | GSM4626770 | OA |
| GSM4626770_TGGGAAGCAGACGCTC-1  | GSM4626770 | OA |
| GSM4626770_TGGGAAGCATAGAAAC-1  | GSM4626770 | OA |
| GSM4626770_TGGGAAGGTAAGAGAG-1  | GSM4626770 | OA |
| GSM4626770_TGGGAAGTCTCAACC-1   | GSM4626770 | OA |
| GSM4626770_TGGGAAGTCTTGTACT-1  | GSM4626770 | OA |
| GSM4626770_TGGGCGTAGACACGAC-1  | GSM4626770 | OA |
| GSM4626770_TGGGCGTAGGACAGCT-1  | GSM4626770 | OA |
| GSM4626770_TGGGCGTAGTGTTAGA-1  | GSM4626770 | OA |
| GSM4626770_TGGGCGTGTTAAGACA-1  | GSM4626770 | OA |
| GSM4626770_TGGGCGTGTTAAGTAG-1  | GSM4626770 | OA |
| GSM4626770_TGGGCGTTCATTGCGA-1  | GSM4626770 | OA |
| GSM4626770_TGGGCGTTCCTAGGGC-1  | GSM4626770 | OA |
| GSM4626770_TGGGCGTTCCTGATTCT-1 | GSM4626770 | OA |
| GSM4626770_TGGGCGTTCCTGTGCAA-1 | GSM4626770 | OA |
| GSM4626770_TGGTTAGAGAGCCCAA-1  | GSM4626770 | OA |
| GSM4626770_TGGTTAGAGCAACGGT-1  | GSM4626770 | OA |
| GSM4626770_TGGTTAGCATATACGC-1  | GSM4626770 | OA |
| GSM4626770_TGGTTAGTCCAAGCCG-1  | GSM4626770 | OA |
| GSM4626770_TGGTTCCCACAGCGTC-1  | GSM4626770 | OA |
| GSM4626770_TGGTTCCCACGAGGTA-1  | GSM4626770 | OA |
| GSM4626770_TGGTTCCCATATACGC-1  | GSM4626770 | OA |
| GSM4626770_TGGTTCCTCAAGGTAA-1  | GSM4626770 | OA |
| GSM4626770_TGTATTCCAGTAGTGGC-1 | GSM4626770 | OA |
| GSM4626770_TGTATTCCACATTAGC-1  | GSM4626770 | OA |
| GSM4626770_TGTATTCCAGGACCCT-1  | GSM4626770 | OA |
| GSM4626770_TGTATTCCATCGGTTA-1  | GSM4626770 | OA |
| GSM4626770_TGTATTCCATCTCCCA-1  | GSM4626770 | OA |
| GSM4626770_TGTATTCCATGACGGA-1  | GSM4626770 | OA |
| GSM4626770_TGTATTCTAGGGTAC-1   | GSM4626770 | OA |
| GSM4626770_TGTATTCTATGGTTC-1   | GSM4626770 | OA |
| GSM4626770_TGTATTCTCAAAGCG-1   | GSM4626770 | OA |
| GSM4626770_TGTATTCTCATATCGG-1  | GSM4626770 | OA |
| GSM4626770_TGTATTCTCCATGAAC-1  | GSM4626770 | OA |
| GSM4626770_TGTCCCAAGCTTATCG-1  | GSM4626770 | OA |
| GSM4626770_TGTCCCAAGTGCCAGA-1  | GSM4626770 | OA |
| GSM4626770_TGTCCCAACAATAACGA-1 | GSM4626770 | OA |
| GSM4626770_TGTCCACACGAAGCA-1   | GSM4626770 | OA |
| GSM4626770_TGTCCCAGTCTCACCT-1  | GSM4626770 | OA |
| GSM4626770_TGTCCCAGTGGCCCTA-1  | GSM4626770 | OA |
| GSM4626770_TGTCCCATCCGTAGTA-1  | GSM4626770 | OA |

|                                |            |    |
|--------------------------------|------------|----|
| GSM4626770_TGTCCCATCTGCTTGC-1  | GSM4626770 | OA |
| GSM4626770_TGTGGTAAGGCTAGGT-1  | GSM4626770 | OA |
| GSM4626770_TGTGGTAAGGTGCTAG-1  | GSM4626770 | OA |
| GSM4626770_TGTGGTAGTAAAGGAG-1  | GSM4626770 | OA |
| GSM4626770_TGTGGTAGTCCGAGTC-1  | GSM4626770 | OA |
| GSM4626770_TGTGGTATCACAGGCC-1  | GSM4626770 | OA |
| GSM4626770_TGTGGTATCGGATGTT-1  | GSM4626770 | OA |
| GSM4626770_TGTGGTATCGGCGGTT-1  | GSM4626770 | OA |
| GSM4626770_TGTGTTTAGGATGGAA-1  | GSM4626770 | OA |
| GSM4626770_TGTGTTTACATTCTGA-1  | GSM4626770 | OA |
| GSM4626770_TGTGTTTGTAGCAAAT-1  | GSM4626770 | OA |
| GSM4626770_TGTGTTTTCAGCGACC-1  | GSM4626770 | OA |
| GSM4626770_TGTGTTTTCGGTTAAC-1  | GSM4626770 | OA |
| GSM4626770_TGTGTTTCTCATTCA-1   | GSM4626770 | OA |
| GSM4626770_TGTTCCGAGACACGAC-1  | GSM4626770 | OA |
| GSM4626770_TGTTCCGAGATCGATA-1  | GSM4626770 | OA |
| GSM4626770_TGTTCCGGTAGCCTAT-1  | GSM4626770 | OA |
| GSM4626770_TGTTCCGGTATAGGGC-1  | GSM4626770 | OA |
| GSM4626770_TGTTCCGGTCTCTTAT-1  | GSM4626770 | OA |
| GSM4626770_TGTTCCGTCCAATGGT-1  | GSM4626770 | OA |
| GSM4626770_TGTTCCGTCCGTCATC-1  | GSM4626770 | OA |
| GSM4626770_TTAACCTCAGTCCATAC-1 | GSM4626770 | OA |
| GSM4626770_TTAACCTCAGTTGAGTA-1 | GSM4626770 | OA |
| GSM4626770_TTAACCTCGTCATGCCG-1 | GSM4626770 | OA |
| GSM4626770_TTAACCTCGTCGTTGTA-1 | GSM4626770 | OA |
| GSM4626770_TTAACCTCGTAGGTT-1   | GSM4626770 | OA |
| GSM4626770_TTAGGACCACCATCCT-1  | GSM4626770 | OA |
| GSM4626770_TTAGGACCAGATGAGC-1  | GSM4626770 | OA |
| GSM4626770_TTAGGACGTAAAGGAG-1  | GSM4626770 | OA |
| GSM4626770_TTAGGACGTACGACCC-1  | GSM4626770 | OA |
| GSM4626770_TTAGGACGTAGCGATG-1  | GSM4626770 | OA |
| GSM4626770_TTAGGACGTGCTGTAT-1  | GSM4626770 | OA |
| GSM4626770_TTAGGACTCTTACCTA-1  | GSM4626770 | OA |
| GSM4626770_TTAGGCAAGGACCACA-1  | GSM4626770 | OA |
| GSM4626770_TTAGGCAAGTTACGGG-1  | GSM4626770 | OA |
| GSM4626770_TTAGGCACAAACAACA-1  | GSM4626770 | OA |
| GSM4626770_TTAGGCACAGCGAACA-1  | GSM4626770 | OA |
| GSM4626770_TTAGGCACATCCTTGC-1  | GSM4626770 | OA |
| GSM4626770_TTAGGCAGTGAGTGAC-1  | GSM4626770 | OA |
| GSM4626770_TTAGGCATCAGTTAGC-1  | GSM4626770 | OA |
| GSM4626770_TTAGTTCAGCGATAGC-1  | GSM4626770 | OA |
| GSM4626770_TTAGTTCAGTAAGTAC-1  | GSM4626770 | OA |
| GSM4626770_TTAGTTCGAAGTACCT-1  | GSM4626770 | OA |
| GSM4626770_TTAGTTCAGGACCCT-1   | GSM4626770 | OA |
| GSM4626770_TTAGTTCATCGTCGG-1   | GSM4626770 | OA |
| GSM4626770_TTAGTTCGTGCATCTA-1  | GSM4626770 | OA |
| GSM4626770_TTAGTTCGTTGAACTC-1  | GSM4626770 | OA |
| GSM4626770_TTAGTTCCTATAACCG-1  | GSM4626770 | OA |
| GSM4626770_TTAGTTCAGCCGCCTA-1  | GSM4626770 | OA |
| GSM4626770_TTAGTTCACGGACAA-1   | GSM4626770 | OA |
| GSM4626770_TTAGTTCATCTGGTA-1   | GSM4626770 | OA |
| GSM4626770_TTAGTTCGTGTGTGCC-1  | GSM4626770 | OA |
| GSM4626770_TTAGTTCGTTATGTGC-1  | GSM4626770 | OA |
| GSM4626770_TTAGTTCGTTCCGGTGT-1 | GSM4626770 | OA |
| GSM4626770_TTAGTTCGTTAGGAG-1   | GSM4626770 | OA |
| GSM4626770_TTAGTTCAGTAGATGT-1  | GSM4626770 | OA |
| GSM4626770_TTAGTTCAGTAGGTA-1   | GSM4626770 | OA |

|                               |            |    |
|-------------------------------|------------|----|
| GSM4626770_TTCCCAGCAAGAAAGG-1 | GSM4626770 | OA |
| GSM4626770_TTCCCAGGTACAGTGG-1 | GSM4626770 | OA |
| GSM4626770_TTCCCAGGTGCACGAA-1 | GSM4626770 | OA |
| GSM4626770_TTCCCAGGTGTGAAAT-1 | GSM4626770 | OA |
| GSM4626770_TTCCCAGTCCAAGTAC-1 | GSM4626770 | OA |
| GSM4626770_TTCCCAGTCCTGCTTG-1 | GSM4626770 | OA |
| GSM4626770_TTCCCAGTCGAGAGCA-1 | GSM4626770 | OA |
| GSM4626770_TTCCCAGTCGCGTAGC-1 | GSM4626770 | OA |
| GSM4626770_TTCCAAGCAAGTAATG-1 | GSM4626770 | OA |
| GSM4626770_TTCCAAGCAATCAGAA-1 | GSM4626770 | OA |
| GSM4626770_TTCCAAGCAGTGAGTG-1 | GSM4626770 | OA |
| GSM4626770_TTCCAAGTCGAGAGCA-1 | GSM4626770 | OA |
| GSM4626770_TTCCAAGTCTAACCGA-1 | GSM4626770 | OA |
| GSM4626770_TTCGGTCAGCACAGGT-1 | GSM4626770 | OA |
| GSM4626770_TTCGGTCAGCCCAACC-1 | GSM4626770 | OA |
| GSM4626770_TTCGGTCAGGTACTCT-1 | GSM4626770 | OA |
| GSM4626770_TTCGGTCAGTGGAGAA-1 | GSM4626770 | OA |
| GSM4626770_TTCGGTCCAAGCCGTC-1 | GSM4626770 | OA |
| GSM4626770_TTCGGTCCACGGATAG-1 | GSM4626770 | OA |
| GSM4626770_TTCGGTCGTAGAGTGC-1 | GSM4626770 | OA |
| GSM4626770_TTCGGTCGTCTTGCGG-1 | GSM4626770 | OA |
| GSM4626770_TTCGGTCTCACCATAG-1 | GSM4626770 | OA |
| GSM4626770_TTCGGTCTCGCCGTGA-1 | GSM4626770 | OA |
| GSM4626770_TTCGGTCTCGTCTGAA-1 | GSM4626770 | OA |
| GSM4626770_TTCGGTCTCTTTAGTC-1 | GSM4626770 | OA |
| GSM4626770_TTCTACAAGAGTTGGC-1 | GSM4626770 | OA |
| GSM4626770_TTCTACACAACCGCCA-1 | GSM4626770 | OA |
| GSM4626770_TTCTACACAAGAAGAG-1 | GSM4626770 | OA |
| GSM4626770_TTCTACAGTAGCGTAG-1 | GSM4626770 | OA |
| GSM4626770_TTCTACAGTGAGTATA-1 | GSM4626770 | OA |
| GSM4626770_TTCTACATCCACGCAG-1 | GSM4626770 | OA |
| GSM4626770_TTCTACATCTCGCATC-1 | GSM4626770 | OA |
| GSM4626770_TTCTACATCTGCAAGT-1 | GSM4626770 | OA |
| GSM4626770_TTCTCAAGTAAGAGAG-1 | GSM4626770 | OA |
| GSM4626770_TTCTCAAGTAGCAAAT-1 | GSM4626770 | OA |
| GSM4626770_TTCTCAATCAACCATG-1 | GSM4626770 | OA |
| GSM4626770_TTCTCAATCACTTCAT-1 | GSM4626770 | OA |
| GSM4626770_TTCTCAATCCTCATT-1  | GSM4626770 | OA |
| GSM4626770_TTCTCAATCGCACTCT-1 | GSM4626770 | OA |
| GSM4626770_TTCTCCTAGACTAAGT-1 | GSM4626770 | OA |
| GSM4626770_TTCTCCTGTGATGATA-1 | GSM4626770 | OA |
| GSM4626770_TTCTCCTGTTCCGTCT-1 | GSM4626770 | OA |
| GSM4626770_TTCTCCTTCGTAGGAG-1 | GSM4626770 | OA |
| GSM4626770_TTCTCCTTCGTTTGCC-1 | GSM4626770 | OA |
| GSM4626770_TTCTCCTTCTGGAGCC-1 | GSM4626770 | OA |
| GSM4626770_TTCTTAGAGTCCGGTC-1 | GSM4626770 | OA |
| GSM4626770_TTCTTAGCACTTAAGC-1 | GSM4626770 | OA |
| GSM4626770_TTCTTAGGTATAATGG-1 | GSM4626770 | OA |
| GSM4626770_TTCTTAGGTATTAGCC-1 | GSM4626770 | OA |
| GSM4626770_TTCTTAGGTTCTCATT-1 | GSM4626770 | OA |
| GSM4626770_TTGAACGAGCCCAACC-1 | GSM4626770 | OA |
| GSM4626770_TTGAACGAGGAGTAGA-1 | GSM4626770 | OA |
| GSM4626770_TTGAACGAGTAACCT-1  | GSM4626770 | OA |
| GSM4626770_TTGAACGCAATCACAC-1 | GSM4626770 | OA |
| GSM4626770_TTGACTTAGGAGCGAG-1 | GSM4626770 | OA |
| GSM4626770_TTGACTTAGGTCATCT-1 | GSM4626770 | OA |
| GSM4626770_TTGACTTCATTCTTAC-1 | GSM4626770 | OA |

|                                 |            |    |
|---------------------------------|------------|----|
| GSM4626770_TTGACTTTCGCAGGCT-1   | GSM4626770 | OA |
| GSM4626770_TTGACTTTCTTTCTCCTC-1 | GSM4626770 | OA |
| GSM4626770_TTGCCGTCAAACAACA-1   | GSM4626770 | OA |
| GSM4626770_TTGCCGTCATCACCCCT-1  | GSM4626770 | OA |
| GSM4626770_TTGCGTCAGGAGCGAG-1   | GSM4626770 | OA |
| GSM4626770_TTGCGTCAGGGTCTCC-1   | GSM4626770 | OA |
| GSM4626770_TTGCGTCCACTAGTAC-1   | GSM4626770 | OA |
| GSM4626770_TTGCGTCCAGCCAATT-1   | GSM4626770 | OA |
| GSM4626770_TTGCGTCCATGGGAAC-1   | GSM4626770 | OA |
| GSM4626770_TTGCGTCGTTACCGAT-1   | GSM4626770 | OA |
| GSM4626770_TTGCGTCTCCTGCCAT-1   | GSM4626770 | OA |
| GSM4626770_TTGGAACAGTGGTAAT-1   | GSM4626770 | OA |
| GSM4626770_TTGGAACGTGAGGCTA-1   | GSM4626770 | OA |
| GSM4626770_TTGGAACTCAGAGACG-1   | GSM4626770 | OA |
| GSM4626770_TTGGAACAGACGCAAC-1   | GSM4626770 | OA |
| GSM4626770_TTGGAACAGGAGCGAG-1   | GSM4626770 | OA |
| GSM4626770_TTGGAACAGGGTTTCT-1   | GSM4626770 | OA |
| GSM4626770_TTGGAACAACACTGGCC-1  | GSM4626770 | OA |
| GSM4626770_TTGGAACACGGACAA-1    | GSM4626770 | OA |
| GSM4626770_TTGGAAGTCCGAGTC-1    | GSM4626770 | OA |
| GSM4626770_TTGGAATCACGACTA-1    | GSM4626770 | OA |
| GSM4626770_TTGTAGGCAAGCGTAG-1   | GSM4626770 | OA |
| GSM4626770_TTGTAGGCAGTTCCT-1    | GSM4626770 | OA |
| GSM4626770_TTGTAGGTCCACGTTT-1   | GSM4626770 | OA |
| GSM4626770_TTGTAGGTCTACGAGT-1   | GSM4626770 | OA |
| GSM4626770_TTTACTGCACCCATGG-1   | GSM4626770 | OA |
| GSM4626770_TTTACTGCACCTCGGA-1   | GSM4626770 | OA |
| GSM4626770_TTTACTGCAGCATGAG-1   | GSM4626770 | OA |
| GSM4626770_TTTACTGCAGTGGGAT-1   | GSM4626770 | OA |
| GSM4626770_TTTACTGCATCTCGCT-1   | GSM4626770 | OA |
| GSM4626770_TTTACTGTCAAGCCTA-1   | GSM4626770 | OA |
| GSM4626770_TTTACTGTCTCGAATGGG-1 | GSM4626770 | OA |
| GSM4626770_TTTACTGTCTCGCATGAT-1 | GSM4626770 | OA |
| GSM4626770_TTTACTGTCTACCTGC-1   | GSM4626770 | OA |
| GSM4626770_TTTACTGTCTGGTTCC-1   | GSM4626770 | OA |
| GSM4626770_TTTATGCAGTGTGAAT-1   | GSM4626770 | OA |
| GSM4626770_TTTATGCAGTGTGGCA-1   | GSM4626770 | OA |
| GSM4626770_TTTATGCCACCACGTG-1   | GSM4626770 | OA |
| GSM4626770_TTTATGCTCTACTATC-1   | GSM4626770 | OA |
| GSM4626770_TTTCCTCAGAGCTATA-1   | GSM4626770 | OA |
| GSM4626770_TTTCCTCAGAGTACCG-1   | GSM4626770 | OA |
| GSM4626770_TTTCCTCAGGGTGTG-1    | GSM4626770 | OA |
| GSM4626770_TTTCCTCAGTAGCCGA-1   | GSM4626770 | OA |
| GSM4626770_TTTCCTCCACGCATCG-1   | GSM4626770 | OA |
| GSM4626770_TTTCCTCCATCCCACT-1   | GSM4626770 | OA |
| GSM4626770_TTTCCTCTCCATGAAC-1   | GSM4626770 | OA |
| GSM4626770_TTTCCTCTCGTACCGG-1   | GSM4626770 | OA |
| GSM4626770_TTTGCGCAGGTTACCT-1   | GSM4626770 | OA |
| GSM4626770_TTTGCGCCATCGGTTA-1   | GSM4626770 | OA |
| GSM4626770_TTTGCGCGTGTGCGTC-1   | GSM4626770 | OA |
| GSM4626770_TTTGCGCTCAACCATG-1   | GSM4626770 | OA |
| GSM4626770_TTTGCGCTCACGAAGG-1   | GSM4626770 | OA |
| GSM4626770_TTTGGTTAGACAGGCT-1   | GSM4626770 | OA |
| GSM4626770_TTTGGTTAGGGAGTAA-1   | GSM4626770 | OA |
| GSM4626770_TTTGGTTAGGTGCACA-1   | GSM4626770 | OA |
| GSM4626770_TTTGGTTAGTAGGCCA-1   | GSM4626770 | OA |
| GSM4626770_TTTGGTTCAAAGGCGT-1   | GSM4626770 | OA |

|                                |            |    |
|--------------------------------|------------|----|
| GSM4626770_TTTGGTTCATCATCCC-1  | GSM4626770 | OA |
| GSM4626770_TTTGGTTCATTGCGGC-1  | GSM4626770 | OA |
| GSM4626770_TTTGGTTTCGGTAAAC-1  | GSM4626770 | OA |
| GSM4626770_TTTGTCAAGAACTCGG-1  | GSM4626770 | OA |
| GSM4626770_TTTGTCAAGATCCCGC-1  | GSM4626770 | OA |
| GSM4626770_TTTGTCACAATCCAAC-1  | GSM4626770 | OA |
| GSM4626770_TTTGTCAGTTGGACCC-1  | GSM4626770 | OA |
| GSM4626770_TTTGTCATCCATTCTA-1  | GSM4626770 | OA |
| GSM4626771_AAACCTGAGAGAACAG-1  | GSM4626771 | OA |
| GSM4626771_AAACCTGAGGATATAC-1  | GSM4626771 | OA |
| GSM4626771_AAACCTGAGTACCGGA-1  | GSM4626771 | OA |
| GSM4626771_AAACCTGCAAACGTGC-1  | GSM4626771 | OA |
| GSM4626771_AAACCTGCAGCATACT-1  | GSM4626771 | OA |
| GSM4626771_AAACCTGCAGCTTCGG-1  | GSM4626771 | OA |
| GSM4626771_AAACCTGGTAGTACCT-1  | GSM4626771 | OA |
| GSM4626771_AAACCTGGTCCAGTGC-1  | GSM4626771 | OA |
| GSM4626771_AAACCTGGTGTGAAAT-1  | GSM4626771 | OA |
| GSM4626771_AAACCTGTCAGATAAG-1  | GSM4626771 | OA |
| GSM4626771_AAACCTGTCTTGCATT-1  | GSM4626771 | OA |
| GSM4626771_AAACGGGAGACGACGT-1  | GSM4626771 | OA |
| GSM4626771_AAACGGGAGAGGGATA-1  | GSM4626771 | OA |
| GSM4626771_AAACGGGAGATTACCC-1  | GSM4626771 | OA |
| GSM4626771_AAACGGGAGGACTGGT-1  | GSM4626771 | OA |
| GSM4626771_AAACGGGAGGCGACAT-1  | GSM4626771 | OA |
| GSM4626771_AAACGGGCATCACCT-1   | GSM4626771 | OA |
| GSM4626771_AAACGGGCATTGAGCT-1  | GSM4626771 | OA |
| GSM4626771_AAACGGGGTAAGGATT-1  | GSM4626771 | OA |
| GSM4626771_AAACGGGGTTATTCTC-1  | GSM4626771 | OA |
| GSM4626771_AAACGGGGTTGTCGCG-1  | GSM4626771 | OA |
| GSM4626771_AAACGGGTCCGTAGGC-1  | GSM4626771 | OA |
| GSM4626771_AAACGGGTTCGTGGACC-1 | GSM4626771 | OA |
| GSM4626771_AAAGATGAGATATGGT-1  | GSM4626771 | OA |
| GSM4626771_AAAGATGAGGGTTCCC-1  | GSM4626771 | OA |
| GSM4626771_AAAGATGAGTGTGAAT-1  | GSM4626771 | OA |
| GSM4626771_AAAGATGCAAATCCGT-1  | GSM4626771 | OA |
| GSM4626771_AAAGATGCAAGTCTGT-1  | GSM4626771 | OA |
| GSM4626771_AAAGATGCAGATTGCT-1  | GSM4626771 | OA |
| GSM4626771_AAAGATGCAGTAAGAT-1  | GSM4626771 | OA |
| GSM4626771_AAAGATGCATCCCACT-1  | GSM4626771 | OA |
| GSM4626771_AAAGATGGTACGCTGC-1  | GSM4626771 | OA |
| GSM4626771_AAAGATGGTCACCTAA-1  | GSM4626771 | OA |
| GSM4626771_AAAGATGGTCCCTTGT-1  | GSM4626771 | OA |
| GSM4626771_AAAGATGTCGCGGATC-1  | GSM4626771 | OA |
| GSM4626771_AAAGCAAAGGACAGCT-1  | GSM4626771 | OA |
| GSM4626771_AAAGCAACACTAGTAC-1  | GSM4626771 | OA |
| GSM4626771_AAAGCAACAGCCTTTC-1  | GSM4626771 | OA |
| GSM4626771_AAAGCAACATATACGC-1  | GSM4626771 | OA |
| GSM4626771_AAAGCAACATTCTCAT-1  | GSM4626771 | OA |
| GSM4626771_AAAGCAAGTAATCGTC-1  | GSM4626771 | OA |
| GSM4626771_AAAGCAAGTTACCGAT-1  | GSM4626771 | OA |
| GSM4626771_AAAGCAATCAACACCA-1  | GSM4626771 | OA |
| GSM4626771_AAAGCAATCAACCAAC-1  | GSM4626771 | OA |
| GSM4626771_AAAGCAATCTACCAGA-1  | GSM4626771 | OA |
| GSM4626771_AAAGCAATCTCTAAGG-1  | GSM4626771 | OA |
| GSM4626771_AAAGTAGAGGACATTA-1  | GSM4626771 | OA |
| GSM4626771_AAAGTAGCATGCCCGA-1  | GSM4626771 | OA |
| GSM4626771_AAAGTAGCATTCTACT-1  | GSM4626771 | OA |



|                               |            |    |
|-------------------------------|------------|----|
| GSM4626771_AAAGTAGGTCTAGTCA-1 | GSM4626771 | OA |
| GSM4626771_AAAGTAGGTTGATTGC-1 | GSM4626771 | OA |
| GSM4626771_AAAGTAGTCCCAAGAT-1 | GSM4626771 | OA |
| GSM4626771_AAAGTAGTCGCAAGCC-1 | GSM4626771 | OA |
| GSM4626771_AAAGTAGTCTAACTCT-1 | GSM4626771 | OA |
| GSM4626771_AAAGTAGTCTCCCTGA-1 | GSM4626771 | OA |
| GSM4626771_AAATGCCAGAAGGTGA-1 | GSM4626771 | OA |
| GSM4626771_AAATGCCCAAGAGGCT-1 | GSM4626771 | OA |
| GSM4626771_AAATGCCCAAGTTAAG-1 | GSM4626771 | OA |
| GSM4626771_AAATGCCCAGGAATCG-1 | GSM4626771 | OA |
| GSM4626771_AAATGCCGTAGCTGCC-1 | GSM4626771 | OA |
| GSM4626771_AAATGCCGTTCAGACT-1 | GSM4626771 | OA |
| GSM4626771_AAATGCCGTTCAGGCC-1 | GSM4626771 | OA |
| GSM4626771_AAATGCCGTTGGTGGA-1 | GSM4626771 | OA |
| GSM4626771_AAATGCCTCCGCATAA-1 | GSM4626771 | OA |
| GSM4626771_AACACGTAGAGCTTCT-1 | GSM4626771 | OA |
| GSM4626771_AACACGTCAGTCAGAG-1 | GSM4626771 | OA |
| GSM4626771_AACACGTCAGTTCCT-1  | GSM4626771 | OA |
| GSM4626771_AACACGTCATTCACTT-1 | GSM4626771 | OA |
| GSM4626771_AACACGTCATTGGGCC-1 | GSM4626771 | OA |
| GSM4626771_AACACGTGTAAGGGCT-1 | GSM4626771 | OA |
| GSM4626771_AACACGTGTCATTAGC-1 | GSM4626771 | OA |
| GSM4626771_AACACGTGTCGTTGTA-1 | GSM4626771 | OA |
| GSM4626771_AACACGTGTGAGTGAC-1 | GSM4626771 | OA |
| GSM4626771_AACACGTGTGGTACAG-1 | GSM4626771 | OA |
| GSM4626771_AACACGTGTGTGGCTC-1 | GSM4626771 | OA |
| GSM4626771_AACCATGAGCCACTAT-1 | GSM4626771 | OA |
| GSM4626771_AACCATGCACCAGATT-1 | GSM4626771 | OA |
| GSM4626771_AACCATGCAGCTGTTA-1 | GSM4626771 | OA |
| GSM4626771_AACCATGGTCAAGCGA-1 | GSM4626771 | OA |
| GSM4626771_AACCATGGTGCGAAAC-1 | GSM4626771 | OA |
| GSM4626771_AACCATGGTGCTTCTC-1 | GSM4626771 | OA |
| GSM4626771_AACCATGTCAATCACG-1 | GSM4626771 | OA |
| GSM4626771_AACCATGTCACCTCGT-1 | GSM4626771 | OA |
| GSM4626771_AACCGCGAGAAGGTTT-1 | GSM4626771 | OA |
| GSM4626771_AACCGCGAGCTCAACT-1 | GSM4626771 | OA |
| GSM4626771_AACCGCGAGCTCCTTC-1 | GSM4626771 | OA |
| GSM4626771_AACCGCGAGGCGTACA-1 | GSM4626771 | OA |
| GSM4626771_AACCGCGCACATGACT-1 | GSM4626771 | OA |
| GSM4626771_AACCGCGCATACTACG-1 | GSM4626771 | OA |
| GSM4626771_AACCGCGGTCACACGC-1 | GSM4626771 | OA |
| GSM4626771_AACCGCGGTTTACTCT-1 | GSM4626771 | OA |
| GSM4626771_AACCGCGTCAACGCTA-1 | GSM4626771 | OA |
| GSM4626771_AACCGCGTCAGGATCT-1 | GSM4626771 | OA |
| GSM4626771_AACCGCGTCGAATCCA-1 | GSM4626771 | OA |
| GSM4626771_AACCGCGTCGAATGGG-1 | GSM4626771 | OA |
| GSM4626771_AACCGCGTCGCTGATA-1 | GSM4626771 | OA |
| GSM4626771_AACCGCGTCTCCGGTT-1 | GSM4626771 | OA |
| GSM4626771_AACGTTGAGAGGTACC-1 | GSM4626771 | OA |
| GSM4626771_AACGTTGAGCTAGTGG-1 | GSM4626771 | OA |
| GSM4626771_AACGTTGCAAGCGCTC-1 | GSM4626771 | OA |
| GSM4626771_AACGTTGCAATGAATG-1 | GSM4626771 | OA |
| GSM4626771_AACGTTGCACCACCAG-1 | GSM4626771 | OA |
| GSM4626771_AACGTTGCACCTATCC-1 | GSM4626771 | OA |
| GSM4626771_AACGTTGCATCAGTCA-1 | GSM4626771 | OA |
| GSM4626771_AACGTTGGTCAATGTC-1 | GSM4626771 | OA |
| GSM4626771_AACGTTGGTTAGATGA-1 | GSM4626771 | OA |

|                                |            |    |
|--------------------------------|------------|----|
| GSM4626771_AACGTTGGTTCACAA-1   | GSM4626771 | OA |
| GSM4626771_AACGTTGTCTTCAAT-1   | GSM4626771 | OA |
| GSM4626771_AACTCAGAGTCTCGGC-1  | GSM4626771 | OA |
| GSM4626771_AACTCAGCAAAGTCT-1   | GSM4626771 | OA |
| GSM4626771_AACTCAGCAAGAGTCG-1  | GSM4626771 | OA |
| GSM4626771_AACTCAGCACCCATGG-1  | GSM4626771 | OA |
| GSM4626771_AACTCAGCATCGACGC-1  | GSM4626771 | OA |
| GSM4626771_AACTCAGGTCTAGAGG-1  | GSM4626771 | OA |
| GSM4626771_AACTCAGGTTCTGTGAT-1 | GSM4626771 | OA |
| GSM4626771_AACTCAGTCAGGTAAA-1  | GSM4626771 | OA |
| GSM4626771_AACTCCCAGATAGTCA-1  | GSM4626771 | OA |
| GSM4626771_AACTCCCAGCTGCGAA-1  | GSM4626771 | OA |
| GSM4626771_AACTCCCCACAGGTTT-1  | GSM4626771 | OA |
| GSM4626771_AACTCCCCAGTATGCT-1  | GSM4626771 | OA |
| GSM4626771_AACTCCCCATAACCTG-1  | GSM4626771 | OA |
| GSM4626771_AACTCCCGTGCAGGTA-1  | GSM4626771 | OA |
| GSM4626771_AACTCCCTCCGTAGGC-1  | GSM4626771 | OA |
| GSM4626771_AACTCCCTCCTATGTT-1  | GSM4626771 | OA |
| GSM4626771_AACTCCCTCGACGGAA-1  | GSM4626771 | OA |
| GSM4626771_AACTCTTAGCGATAGC-1  | GSM4626771 | OA |
| GSM4626771_AACTCTTCAAGTCTGT-1  | GSM4626771 | OA |
| GSM4626771_AACTCTTCAGTTCATG-1  | GSM4626771 | OA |
| GSM4626771_AACTCTTCATCGTCGG-1  | GSM4626771 | OA |
| GSM4626771_AACTCTTGTCCAGTGC-1  | GSM4626771 | OA |
| GSM4626771_AACTCTTGTGTGGTTT-1  | GSM4626771 | OA |
| GSM4626771_AACTCTTGTTTCGCTAA-1 | GSM4626771 | OA |
| GSM4626771_AACTCTTGTTTCGTCTC-1 | GSM4626771 | OA |
| GSM4626771_AACTCTTTCAGTTGAC-1  | GSM4626771 | OA |
| GSM4626771_AACTCTTCTGAAAGA-1   | GSM4626771 | OA |
| GSM4626771_AACTCTTCTGTGCAA-1   | GSM4626771 | OA |
| GSM4626771_AACTGGTAGACATAAC-1  | GSM4626771 | OA |
| GSM4626771_AACTGGTAGATAGCAT-1  | GSM4626771 | OA |
| GSM4626771_AACTGGTAGATCTGAA-1  | GSM4626771 | OA |
| GSM4626771_AACTGGTGTAGCGTCC-1  | GSM4626771 | OA |
| GSM4626771_AACTGGTGTGGCGAAT-1  | GSM4626771 | OA |
| GSM4626771_AACTGGTGTGGACCC-1   | GSM4626771 | OA |
| GSM4626771_AACTGGTTCAAACAAG-1  | GSM4626771 | OA |
| GSM4626771_AACTGGTTCCTCGCAT-1  | GSM4626771 | OA |
| GSM4626771_AACTTTCAGAGCTGCA-1  | GSM4626771 | OA |
| GSM4626771_AACTTTCAGGTGGGTT-1  | GSM4626771 | OA |
| GSM4626771_AACTTTCAGTTACCCA-1  | GSM4626771 | OA |
| GSM4626771_AACTTTCGTCCAAGTT-1  | GSM4626771 | OA |
| GSM4626771_AACTTTCGTGATGTGG-1  | GSM4626771 | OA |
| GSM4626771_AACTTTCGTGCAGACA-1  | GSM4626771 | OA |
| GSM4626771_AACTTTCCTCCGGATG-1  | GSM4626771 | OA |
| GSM4626771_AAGACCTAGGCCATAG-1  | GSM4626771 | OA |
| GSM4626771_AAGACCTAGTGCGTGA-1  | GSM4626771 | OA |
| GSM4626771_AAGACCTACCCATGG-1   | GSM4626771 | OA |
| GSM4626771_AAGACCTGTACCAGTT-1  | GSM4626771 | OA |
| GSM4626771_AAGACCTGTGCAGACA-1  | GSM4626771 | OA |
| GSM4626771_AAGACCTGTTAAAGAC-1  | GSM4626771 | OA |
| GSM4626771_AAGACCTTCACCGTAA-1  | GSM4626771 | OA |
| GSM4626771_AAGACCTTCCGTACAA-1  | GSM4626771 | OA |
| GSM4626771_AAGACCTTCGTCCGTT-1  | GSM4626771 | OA |
| GSM4626771_AAGACCTTCTCGTTTA-1  | GSM4626771 | OA |
| GSM4626771_AAGCCGCAGATTACCC-1  | GSM4626771 | OA |
| GSM4626771_AAGCCGCCAAGCCCAC-1  | GSM4626771 | OA |

|                                |            |    |
|--------------------------------|------------|----|
| GSM4626771_AAGCCGCCAGATCGGA-1  | GSM4626771 | OA |
| GSM4626771_AAGCCGCCAGGTCCAC-1  | GSM4626771 | OA |
| GSM4626771_AAGCCGCGTCGCATAT-1  | GSM4626771 | OA |
| GSM4626771_AAGCCGCTCACAAACC-1  | GSM4626771 | OA |
| GSM4626771_AAGCCGCTCACATACG-1  | GSM4626771 | OA |
| GSM4626771_AAGGAGCAGAAGCCCA-1  | GSM4626771 | OA |
| GSM4626771_AAGGAGCAGGGTCTCC-1  | GSM4626771 | OA |
| GSM4626771_AAGGAGCCAACACCTA-1  | GSM4626771 | OA |
| GSM4626771_AAGGAGCCAATGCCAT-1  | GSM4626771 | OA |
| GSM4626771_AAGGAGCCAGCTCCGA-1  | GSM4626771 | OA |
| GSM4626771_AAGGAGCCAGTACACT-1  | GSM4626771 | OA |
| GSM4626771_AAGGAGCGTAGTAGTA-1  | GSM4626771 | OA |
| GSM4626771_AAGGAGCGTTCCACTC-1  | GSM4626771 | OA |
| GSM4626771_AAGGAGCTCCTCGCAT-1  | GSM4626771 | OA |
| GSM4626771_AAGGAGCTCTTGGGTA-1  | GSM4626771 | OA |
| GSM4626771_AAGGCAGAGATCCGAG-1  | GSM4626771 | OA |
| GSM4626771_AAGGCAGAGTACTTGC-1  | GSM4626771 | OA |
| GSM4626771_AAGGCAGAGTTCGCAT-1  | GSM4626771 | OA |
| GSM4626771_AAGGCAGCAGAGCCAA-1  | GSM4626771 | OA |
| GSM4626771_AAGGCAGGTTCAGTAC-1  | GSM4626771 | OA |
| GSM4626771_AAGGCAGGTTGTGGAG-1  | GSM4626771 | OA |
| GSM4626771_AAGGCAGTCACGATGT-1  | GSM4626771 | OA |
| GSM4626771_AAGGCAGTCAGGATCT-1  | GSM4626771 | OA |
| GSM4626771_AAGGCAGTCCTCAACC-1  | GSM4626771 | OA |
| GSM4626771_AAGGTTTCAGGCATGGT-1 | GSM4626771 | OA |
| GSM4626771_AAGGTTTCAGTGTCCCG-1 | GSM4626771 | OA |
| GSM4626771_AAGGTTCCATGGATGG-1  | GSM4626771 | OA |
| GSM4626771_AAGGTTTCGTATCGCAT-1 | GSM4626771 | OA |
| GSM4626771_AAGGTTTCGTCTCTTTA-1 | GSM4626771 | OA |
| GSM4626771_AAGGTTTCGTGGCCCTA-1 | GSM4626771 | OA |
| GSM4626771_AAGGTTCTCACCATAG-1  | GSM4626771 | OA |
| GSM4626771_AAGGTTCTCTAACTCT-1  | GSM4626771 | OA |
| GSM4626771_AAGTCTGAGACATAAC-1  | GSM4626771 | OA |
| GSM4626771_AAGTCTGAGGCCCGTT-1  | GSM4626771 | OA |
| GSM4626771_AAGTCTGAGTGGTCCC-1  | GSM4626771 | OA |
| GSM4626771_AAGTCTGCACGAAATA-1  | GSM4626771 | OA |
| GSM4626771_AAGTCTGCATAGTAAG-1  | GSM4626771 | OA |
| GSM4626771_AAGTCTGCATTGGCGC-1  | GSM4626771 | OA |
| GSM4626771_AAGTCTGGTCAGTGGA-1  | GSM4626771 | OA |
| GSM4626771_AAGTCTGTCCTTGCCA-1  | GSM4626771 | OA |
| GSM4626771_AAGTCTGTCTTTAGG-1   | GSM4626771 | OA |
| GSM4626771_AAGTCTGTCTTGTGTTG-1 | GSM4626771 | OA |
| GSM4626771_AATCCAGAGAATTGTG-1  | GSM4626771 | OA |
| GSM4626771_AATCCAGAGCACCGTC-1  | GSM4626771 | OA |
| GSM4626771_AATCCAGAGCCCAATT-1  | GSM4626771 | OA |
| GSM4626771_AATCCAGAGGCAGTCA-1  | GSM4626771 | OA |
| GSM4626771_AATCCAGCACATGACT-1  | GSM4626771 | OA |
| GSM4626771_AATCCAGCACGTCTCT-1  | GSM4626771 | OA |
| GSM4626771_AATCCAGCAGATAATG-1  | GSM4626771 | OA |
| GSM4626771_AATCCAGTCATCGCTC-1  | GSM4626771 | OA |
| GSM4626771_AATCGGTCACGGTAGA-1  | GSM4626771 | OA |
| GSM4626771_AATCGGTCAGCGTCCA-1  | GSM4626771 | OA |
| GSM4626771_AATCGGTGTAATTGGA-1  | GSM4626771 | OA |
| GSM4626771_AATCGGTTACATGCA-1   | GSM4626771 | OA |
| GSM4626771_ACACCAAAGCGTAATA-1  | GSM4626771 | OA |
| GSM4626771_ACACCAAAGGATGGTC-1  | GSM4626771 | OA |
| GSM4626771_ACACCAAAGTAAAGGAG-1 | GSM4626771 | OA |

|                                |            |    |
|--------------------------------|------------|----|
| GSM4626771_ACACCAAGTCTAGCCG-1  | GSM4626771 | OA |
| GSM4626771_ACACCAAGTGTTGGGA-1  | GSM4626771 | OA |
| GSM4626771_ACACCAATCATATCGG-1  | GSM4626771 | OA |
| GSM4626771_ACACCAATCTTGAGAC-1  | GSM4626771 | OA |
| GSM4626771_ACACCCTAGATACACA-1  | GSM4626771 | OA |
| GSM4626771_ACACCCTAGGCCATAG-1  | GSM4626771 | OA |
| GSM4626771_ACACCCTAGGCGACAT-1  | GSM4626771 | OA |
| GSM4626771_ACACCCTAGGGTTCGAT-1 | GSM4626771 | OA |
| GSM4626771_ACACCCTCACTTCTGC-1  | GSM4626771 | OA |
| GSM4626771_ACACCCTGTCAATGTC-1  | GSM4626771 | OA |
| GSM4626771_ACACCCTGTCTGGAGA-1  | GSM4626771 | OA |
| GSM4626771_ACACCCTGTGTGCCTG-1  | GSM4626771 | OA |
| GSM4626771_ACACCCTTCACCGTAA-1  | GSM4626771 | OA |
| GSM4626771_ACACCCTTCTGTGCAA-1  | GSM4626771 | OA |
| GSM4626771_ACACCGGGTAAATACG-1  | GSM4626771 | OA |
| GSM4626771_ACACCGGGTGTCATCTA-1 | GSM4626771 | OA |
| GSM4626771_ACACCGGTCTAACGGT-1  | GSM4626771 | OA |
| GSM4626771_ACACTGAAGCGTTGCC-1  | GSM4626771 | OA |
| GSM4626771_ACACTGACAATCCAAC-1  | GSM4626771 | OA |
| GSM4626771_ACACTGACACATCCGG-1  | GSM4626771 | OA |
| GSM4626771_ACACTGACACTACAGT-1  | GSM4626771 | OA |
| GSM4626771_ACACTGAGTAGGACAC-1  | GSM4626771 | OA |
| GSM4626771_ACACTGAGTCGCTTTC-1  | GSM4626771 | OA |
| GSM4626771_ACACTGAGTGGTACAG-1  | GSM4626771 | OA |
| GSM4626771_ACACTGATCCAGTAGT-1  | GSM4626771 | OA |
| GSM4626771_ACACTGATCTAACTCT-1  | GSM4626771 | OA |
| GSM4626771_ACAGCCGAGCTCTCGG-1  | GSM4626771 | OA |
| GSM4626771_ACAGCCGCACAGAGGT-1  | GSM4626771 | OA |
| GSM4626771_ACAGCCGCACATTCTGA-1 | GSM4626771 | OA |
| GSM4626771_ACAGCCGCAGGGTACA-1  | GSM4626771 | OA |
| GSM4626771_ACAGCCGGTACCGGCT-1  | GSM4626771 | OA |
| GSM4626771_ACAGCCGTCAGCATGT-1  | GSM4626771 | OA |
| GSM4626771_ACAGCCGTCTGGTTCC-1  | GSM4626771 | OA |
| GSM4626771_ACAGCCGTCTTACCGC-1  | GSM4626771 | OA |
| GSM4626771_ACAGCTAAGAGTAAGG-1  | GSM4626771 | OA |
| GSM4626771_ACAGCTAAGGCTCAGA-1  | GSM4626771 | OA |
| GSM4626771_ACAGCTACAATCCAAC-1  | GSM4626771 | OA |
| GSM4626771_ACAGCTACAGCCTATA-1  | GSM4626771 | OA |
| GSM4626771_ACAGCTACATATACGC-1  | GSM4626771 | OA |
| GSM4626771_ACAGCTACATCCTAGA-1  | GSM4626771 | OA |
| GSM4626771_ACAGCTAGTAGAGTGC-1  | GSM4626771 | OA |
| GSM4626771_ACAGCTAGTGACTACT-1  | GSM4626771 | OA |
| GSM4626771_ACAGCTAGTGCAGACA-1  | GSM4626771 | OA |
| GSM4626771_ACAGCTAGTTTACTCT-1  | GSM4626771 | OA |
| GSM4626771_ACAGCTATCGCCCTTA-1  | GSM4626771 | OA |
| GSM4626771_ACAGCTATCGCTGATA-1  | GSM4626771 | OA |
| GSM4626771_ACAGCTATCTCGCATC-1  | GSM4626771 | OA |
| GSM4626771_ACATACGAGAGTAAGG-1  | GSM4626771 | OA |
| GSM4626771_ACATACGAGCAGGCTA-1  | GSM4626771 | OA |
| GSM4626771_ACATACGAGTAGCGGT-1  | GSM4626771 | OA |
| GSM4626771_ACATACGAGTGTTTGC-1  | GSM4626771 | OA |
| GSM4626771_ACATACGCAAACCTAC-1  | GSM4626771 | OA |
| GSM4626771_ACATACGCAAGACGTG-1  | GSM4626771 | OA |
| GSM4626771_ACATACGCAATCACAC-1  | GSM4626771 | OA |
| GSM4626771_ACATACGCATTTGCTT-1  | GSM4626771 | OA |
| GSM4626771_ACATACGGTAAGTGTA-1  | GSM4626771 | OA |
| GSM4626771_ACATACGGTACATGTC-1  | GSM4626771 | OA |

|                                 |            |    |
|---------------------------------|------------|----|
| GSM4626771_ACATACGGTTCAGTAC-1   | GSM4626771 | OA |
| GSM4626771_ACATACGGTTCGGCAC-1   | GSM4626771 | OA |
| GSM4626771_ACATACGGTTTGACTG-1   | GSM4626771 | OA |
| GSM4626771_ACATACGTCCAAAGTC-1   | GSM4626771 | OA |
| GSM4626771_ACATACGTCCGCATGGC-1  | GSM4626771 | OA |
| GSM4626771_ACATACGTCCGCATCG-1   | GSM4626771 | OA |
| GSM4626771_ACATACGTCTACTATC-1   | GSM4626771 | OA |
| GSM4626771_ACATACGTCTCGTTTA-1   | GSM4626771 | OA |
| GSM4626771_ACATCAGAGATCCCAT-1   | GSM4626771 | OA |
| GSM4626771_ACATCAGAGATGCCTT-1   | GSM4626771 | OA |
| GSM4626771_ACATCAGAGCAATCTC-1   | GSM4626771 | OA |
| GSM4626771_ACATCAGAGCCAGTTT-1   | GSM4626771 | OA |
| GSM4626771_ACATCAGAGCTGTTCA-1   | GSM4626771 | OA |
| GSM4626771_ACATCAGCATCCGGGT-1   | GSM4626771 | OA |
| GSM4626771_ACATCAGGTAAGCACG-1   | GSM4626771 | OA |
| GSM4626771_ACATCAGGTACCGCTG-1   | GSM4626771 | OA |
| GSM4626771_ACATCAGGTGACTACT-1   | GSM4626771 | OA |
| GSM4626771_ACATCAGGTGGCTCCA-1   | GSM4626771 | OA |
| GSM4626771_ACATCAGGTTATCACG-1   | GSM4626771 | OA |
| GSM4626771_ACATCAGGTTCCATGA-1   | GSM4626771 | OA |
| GSM4626771_ACATCAGTCCGCTGTT-1   | GSM4626771 | OA |
| GSM4626771_ACATCAGTCGAGCCCA-1   | GSM4626771 | OA |
| GSM4626771_ACATCAGTCTATCGCC-1   | GSM4626771 | OA |
| GSM4626771_ACATGGTAGAGATGAG-1   | GSM4626771 | OA |
| GSM4626771_ACATGGTAGCGATAGC-1   | GSM4626771 | OA |
| GSM4626771_ACATGGTAGTTCGCGC-1   | GSM4626771 | OA |
| GSM4626771_ACATGGTCACAACGCC-1   | GSM4626771 | OA |
| GSM4626771_ACATGGTCAGCTTAAC-1   | GSM4626771 | OA |
| GSM4626771_ACATGGTCATACAGCT-1   | GSM4626771 | OA |
| GSM4626771_ACATGGTTCATCGGAT-1   | GSM4626771 | OA |
| GSM4626771_ACATGGTTCGTCACGG-1   | GSM4626771 | OA |
| GSM4626771_ACATGGTTCGTTACGA-1   | GSM4626771 | OA |
| GSM4626771_ACATGGTTCGTTGCCT-1   | GSM4626771 | OA |
| GSM4626771_ACATGGTTCGTTGACCTC-1 | GSM4626771 | OA |
| GSM4626771_ACATGGTTCCTTGCAAG-1  | GSM4626771 | OA |
| GSM4626771_ACCAGTAAGACATAAC-1   | GSM4626771 | OA |
| GSM4626771_ACCAGTAAGATATACG-1   | GSM4626771 | OA |
| GSM4626771_ACCAGTAAGTGATCGG-1   | GSM4626771 | OA |
| GSM4626771_ACCAGTACAGACAAGC-1   | GSM4626771 | OA |
| GSM4626771_ACCAGTACAGGGCATA-1   | GSM4626771 | OA |
| GSM4626771_ACCAGTATCCATGAAC-1   | GSM4626771 | OA |
| GSM4626771_ACCAGTATCCTACAGA-1   | GSM4626771 | OA |
| GSM4626771_ACCCACTAGTGACTCT-1   | GSM4626771 | OA |
| GSM4626771_ACCCACTCAAAGTGTG-1   | GSM4626771 | OA |
| GSM4626771_ACCCACTCACCCATGG-1   | GSM4626771 | OA |
| GSM4626771_ACCCACTCAGACGCCT-1   | GSM4626771 | OA |
| GSM4626771_ACCCACTGTCTTTCAT-1   | GSM4626771 | OA |
| GSM4626771_ACCCACTGTGTGCCTG-1   | GSM4626771 | OA |
| GSM4626771_ACCCACTGTTCAGTAC-1   | GSM4626771 | OA |
| GSM4626771_ACCGTAAAGGTGATTA-1   | GSM4626771 | OA |
| GSM4626771_ACCGTAACACAAGCCC-1   | GSM4626771 | OA |
| GSM4626771_ACCGTAACATGGTCAT-1   | GSM4626771 | OA |
| GSM4626771_ACCGTAAGTAATAGCA-1   | GSM4626771 | OA |
| GSM4626771_ACCGTAAGTGAAAGAG-1   | GSM4626771 | OA |
| GSM4626771_ACCGTAAGTGCGGTAA-1   | GSM4626771 | OA |
| GSM4626771_ACCGTAAGTGTTTCA-1    | GSM4626771 | OA |
| GSM4626771_ACCGTAATCATACGGT-1   | GSM4626771 | OA |

|                                |            |    |
|--------------------------------|------------|----|
| GSM4626771_ACCGTAATCTGCTGCT-1  | GSM4626771 | OA |
| GSM4626771_ACCTTTAAGCAGACTG-1  | GSM4626771 | OA |
| GSM4626771_ACCTTTAAGCAGCCTC-1  | GSM4626771 | OA |
| GSM4626771_ACCTTTAAGCTGATAA-1  | GSM4626771 | OA |
| GSM4626771_ACCTTTAAGGCTCTTA-1  | GSM4626771 | OA |
| GSM4626771_ACCTTTAAGGGTCTCC-1  | GSM4626771 | OA |
| GSM4626771_ACCTTTACAAGAGGCT-1  | GSM4626771 | OA |
| GSM4626771_ACCTTTACAAGCCGTC-1  | GSM4626771 | OA |
| GSM4626771_ACCTTTAGTACAGCAG-1  | GSM4626771 | OA |
| GSM4626771_ACCTTTAGTTGGAGGT-1  | GSM4626771 | OA |
| GSM4626771_ACCTTTATCGCTAGCG-1  | GSM4626771 | OA |
| GSM4626771_ACGAGCCAGACAAGCC-1  | GSM4626771 | OA |
| GSM4626771_ACGAGCCAGAGACTAT-1  | GSM4626771 | OA |
| GSM4626771_ACGAGCCAGATGTGGC-1  | GSM4626771 | OA |
| GSM4626771_ACGAGCCAGGATATAC-1  | GSM4626771 | OA |
| GSM4626771_ACGAGCCAGTCTCGGC-1  | GSM4626771 | OA |
| GSM4626771_ACGAGCCAGTCTTGCA-1  | GSM4626771 | OA |
| GSM4626771_ACGAGCCAGTTACGGG-1  | GSM4626771 | OA |
| GSM4626771_ACGAGCCCAATGACCT-1  | GSM4626771 | OA |
| GSM4626771_ACGAGCCCACAGTCGC-1  | GSM4626771 | OA |
| GSM4626771_ACGAGCCCAGGGTATG-1  | GSM4626771 | OA |
| GSM4626771_ACGAGCCCATCACCT-1   | GSM4626771 | OA |
| GSM4626771_ACGAGCCGTAGCGTGA-1  | GSM4626771 | OA |
| GSM4626771_ACGAGCCGTATGAAAC-1  | GSM4626771 | OA |
| GSM4626771_ACGAGCCGTCTCATCC-1  | GSM4626771 | OA |
| GSM4626771_ACGAGCCGTCTTTCAT-1  | GSM4626771 | OA |
| GSM4626771_ACGAGCCTCAGCGATT-1  | GSM4626771 | OA |
| GSM4626771_ACGAGCCTCCAAGTA-1   | GSM4626771 | OA |
| GSM4626771_ACGAGCCTCGGCTTGG-1  | GSM4626771 | OA |
| GSM4626771_ACGAGCCTCTGCGGCA-1  | GSM4626771 | OA |
| GSM4626771_ACGAGCCTCTTGACGA-1  | GSM4626771 | OA |
| GSM4626771_ACGAGGAAGGGCACTA-1  | GSM4626771 | OA |
| GSM4626771_ACGAGGAAGTGAATTG-1  | GSM4626771 | OA |
| GSM4626771_ACGAGGACAAATCCGT-1  | GSM4626771 | OA |
| GSM4626771_ACGAGGACACATCCAA-1  | GSM4626771 | OA |
| GSM4626771_ACGAGGACAGATCTGT-1  | GSM4626771 | OA |
| GSM4626771_ACGAGGACAGTATCTG-1  | GSM4626771 | OA |
| GSM4626771_ACGAGGACATCACCT-1   | GSM4626771 | OA |
| GSM4626771_ACGAGGAGTATATCCG-1  | GSM4626771 | OA |
| GSM4626771_ACGAGGAGTCGCATCG-1  | GSM4626771 | OA |
| GSM4626771_ACGAGGAGTGAGGGTT-1  | GSM4626771 | OA |
| GSM4626771_ACGAGGATCAAGAAGT-1  | GSM4626771 | OA |
| GSM4626771_ACGAGGATCATCATTC-1  | GSM4626771 | OA |
| GSM4626771_ACGAGGATCTCTGAGA-1  | GSM4626771 | OA |
| GSM4626771_ACGATACAGAGCTGGT-1  | GSM4626771 | OA |
| GSM4626771_ACGATACAGCACACAG-1  | GSM4626771 | OA |
| GSM4626771_ACGATACAGCTAAACA-1  | GSM4626771 | OA |
| GSM4626771_ACGATACCATGTTCGAT-1 | GSM4626771 | OA |
| GSM4626771_ACGATACCATGAGCT-1   | GSM4626771 | OA |
| GSM4626771_ACGATACGTCACCTAA-1  | GSM4626771 | OA |
| GSM4626771_ACGATACGTCGAATCT-1  | GSM4626771 | OA |
| GSM4626771_ACGATACGTTAAGAAC-1  | GSM4626771 | OA |
| GSM4626771_ACGATACTCAGATAAG-1  | GSM4626771 | OA |
| GSM4626771_ACGATACTCCTTCAAT-1  | GSM4626771 | OA |
| GSM4626771_ACGATACTCGGAAATA-1  | GSM4626771 | OA |
| GSM4626771_ACGATACTCGGCGCAT-1  | GSM4626771 | OA |
| GSM4626771_ACGATACTCTGCGACG-1  | GSM4626771 | OA |

|                                 |            |    |
|---------------------------------|------------|----|
| GSM4626771_ACGATGTAGGCATGTG-1   | GSM4626771 | OA |
| GSM4626771_ACGATGTCAGGCTCAC-1   | GSM4626771 | OA |
| GSM4626771_ACGATGTTCCAGTATG-1   | GSM4626771 | OA |
| GSM4626771_ACGATGTTCTGGTGTA-1   | GSM4626771 | OA |
| GSM4626771_ACGCAGCAGAAGCCCA-1   | GSM4626771 | OA |
| GSM4626771_ACGCAGCAGCATGGCA-1   | GSM4626771 | OA |
| GSM4626771_ACGCAGCAGCTAAACA-1   | GSM4626771 | OA |
| GSM4626771_ACGCAGCAGGTGATAT-1   | GSM4626771 | OA |
| GSM4626771_ACGCAGCAGTGGACGT-1   | GSM4626771 | OA |
| GSM4626771_ACGCAGCAGTGTTAGA-1   | GSM4626771 | OA |
| GSM4626771_ACGCAGCCAAACAACA-1   | GSM4626771 | OA |
| GSM4626771_ACGCAGCCACAACACTGT-1 | GSM4626771 | OA |
| GSM4626771_ACGCAGCCACAGACAG-1   | GSM4626771 | OA |
| GSM4626771_ACGCAGCCACGGTAAG-1   | GSM4626771 | OA |
| GSM4626771_ACGCAGCCATGCTAGT-1   | GSM4626771 | OA |
| GSM4626771_ACGCAGCGTCGCTTTC-1   | GSM4626771 | OA |
| GSM4626771_ACGCAGCGTGATGCC-1    | GSM4626771 | OA |
| GSM4626771_ACGCAGCGTGGAAGA-1    | GSM4626771 | OA |
| GSM4626771_ACGCAGCTCACCTCGT-1   | GSM4626771 | OA |
| GSM4626771_ACGCAGCTCAGTTAGC-1   | GSM4626771 | OA |
| GSM4626771_ACGCAGCTCATTCACT-1   | GSM4626771 | OA |
| GSM4626771_ACGCAGCTCCACTTG-1    | GSM4626771 | OA |
| GSM4626771_ACGCCAGAGACAGGCT-1   | GSM4626771 | OA |
| GSM4626771_ACGCCAGAGTAGCGGT-1   | GSM4626771 | OA |
| GSM4626771_ACGCCAGCAAGCCTAT-1   | GSM4626771 | OA |
| GSM4626771_ACGCCAGCATGACATC-1   | GSM4626771 | OA |
| GSM4626771_ACGCCAGGTCCTGGC-1    | GSM4626771 | OA |
| GSM4626771_ACGCCAGTCGATGAGG-1   | GSM4626771 | OA |
| GSM4626771_ACGCCAGTCGTCCAGG-1   | GSM4626771 | OA |
| GSM4626771_ACGCCAGTCTGGGCA-1    | GSM4626771 | OA |
| GSM4626771_ACGCCGAAGATCCTGT-1   | GSM4626771 | OA |
| GSM4626771_ACGCCGAAGATGGGTC-1   | GSM4626771 | OA |
| GSM4626771_ACGCCGAAGTTAACGA-1   | GSM4626771 | OA |
| GSM4626771_ACGCCGACAGCGTAAG-1   | GSM4626771 | OA |
| GSM4626771_ACGCCGACAGTGGGAT-1   | GSM4626771 | OA |
| GSM4626771_ACGCCGACATTTCACT-1   | GSM4626771 | OA |
| GSM4626771_ACGCCGAGTAACGACG-1   | GSM4626771 | OA |
| GSM4626771_ACGCCGAGTGTTGAGG-1   | GSM4626771 | OA |
| GSM4626771_ACGCCGATCCACTCCA-1   | GSM4626771 | OA |
| GSM4626771_ACGGAGAAGGAATGGA-1   | GSM4626771 | OA |
| GSM4626771_ACGGAGAAGGCTCTTA-1   | GSM4626771 | OA |
| GSM4626771_ACGGAGACACATGACT-1   | GSM4626771 | OA |
| GSM4626771_ACGGAGACACCGATAT-1   | GSM4626771 | OA |
| GSM4626771_ACGGAGACAGCCAGAA-1   | GSM4626771 | OA |
| GSM4626771_ACGGAGACAGGATTGG-1   | GSM4626771 | OA |
| GSM4626771_ACGGAGACATGAACCT-1   | GSM4626771 | OA |
| GSM4626771_ACGGAGACATGTCCTC-1   | GSM4626771 | OA |
| GSM4626771_ACGGAGAGTCCGAACC-1   | GSM4626771 | OA |
| GSM4626771_ACGGAGAGTTCTGAAC-1   | GSM4626771 | OA |
| GSM4626771_ACGGAGAGTTGATTGC-1   | GSM4626771 | OA |
| GSM4626771_ACGGAGAGTTGCGCAC-1   | GSM4626771 | OA |
| GSM4626771_ACGGAGATCGGCGGTT-1   | GSM4626771 | OA |
| GSM4626771_ACGGCCACAAGCCCAC-1   | GSM4626771 | OA |
| GSM4626771_ACGGCCACACGAAACG-1   | GSM4626771 | OA |
| GSM4626771_ACGGCCACAGCTCGCA-1   | GSM4626771 | OA |
| GSM4626771_ACGGCCACATCAGTAC-1   | GSM4626771 | OA |
| GSM4626771_ACGGCCAGTTTCGCTC-1   | GSM4626771 | OA |

|                                |            |    |
|--------------------------------|------------|----|
| GSM4626771_ACGGCCATCCGCTGTT-1  | GSM4626771 | OA |
| GSM4626771_ACGGCCATCTAACGGT-1  | GSM4626771 | OA |
| GSM4626771_ACGGCCATCTGTCTAT-1  | GSM4626771 | OA |
| GSM4626771_ACGGGCTGTAAGGGAA-1  | GSM4626771 | OA |
| GSM4626771_ACGGGCTGTACCGTAT-1  | GSM4626771 | OA |
| GSM4626771_ACGGGCTGTCCGGTCT-1  | GSM4626771 | OA |
| GSM4626771_ACGGGCTTCGCCATAA-1  | GSM4626771 | OA |
| GSM4626771_ACGGGTCAGAACAATC-1  | GSM4626771 | OA |
| GSM4626771_ACGGGTCAGACAAAGG-1  | GSM4626771 | OA |
| GSM4626771_ACGGGTCGTAGAGTGC-1  | GSM4626771 | OA |
| GSM4626771_ACGGGTCGTGCTAGCC-1  | GSM4626771 | OA |
| GSM4626771_ACGGGTCTCCTTGCCA-1  | GSM4626771 | OA |
| GSM4626771_ACGGGTCTCGGCATCG-1  | GSM4626771 | OA |
| GSM4626771_ACGTCAAAGGACACCA-1  | GSM4626771 | OA |
| GSM4626771_ACGTCAAAGGGAAACA-1  | GSM4626771 | OA |
| GSM4626771_ACGTCAAAGTAAGTAC-1  | GSM4626771 | OA |
| GSM4626771_ACGTCAAAGTGGGCTA-1  | GSM4626771 | OA |
| GSM4626771_ACGTCAACAAACCCAT-1  | GSM4626771 | OA |
| GSM4626771_ACGTCAACAGACAGGT-1  | GSM4626771 | OA |
| GSM4626771_ACGTCAACATTGGCGC-1  | GSM4626771 | OA |
| GSM4626771_ACGTCAAGTACAGTGG-1  | GSM4626771 | OA |
| GSM4626771_ACGTCAATCGGGAGTA-1  | GSM4626771 | OA |
| GSM4626771_ACTATCTAGAGTTGGC-1  | GSM4626771 | OA |
| GSM4626771_ACTATCTAGCTAACAA-1  | GSM4626771 | OA |
| GSM4626771_ACTATCTAGTAGCGGT-1  | GSM4626771 | OA |
| GSM4626771_ACTATCTAGTCGCCGT-1  | GSM4626771 | OA |
| GSM4626771_ACTATCTAGTTGAGTA-1  | GSM4626771 | OA |
| GSM4626771_ACTATCTCACGACGAA-1  | GSM4626771 | OA |
| GSM4626771_ACTATCTCACGGCTAC-1  | GSM4626771 | OA |
| GSM4626771_ACTATCTCAGAGTGTG-1  | GSM4626771 | OA |
| GSM4626771_ACTATCTCAGCGATCC-1  | GSM4626771 | OA |
| GSM4626771_ACTATCTCATTCCCTGC-1 | GSM4626771 | OA |
| GSM4626771_ACTATCTGTCCGTTAA-1  | GSM4626771 | OA |
| GSM4626771_ACTATCTGTCTCACCT-1  | GSM4626771 | OA |
| GSM4626771_ACTATCTGTGAGGGTT-1  | GSM4626771 | OA |
| GSM4626771_ACTATCTTCAGTACGT-1  | GSM4626771 | OA |
| GSM4626771_ACTATCTTCATGGTCA-1  | GSM4626771 | OA |
| GSM4626771_ACTATCTTCGCCGTGA-1  | GSM4626771 | OA |
| GSM4626771_ACTATCTTCTGCGGCA-1  | GSM4626771 | OA |
| GSM4626771_ACTGAACCAGATGGGT-1  | GSM4626771 | OA |
| GSM4626771_ACTGAACCAGCCTGTG-1  | GSM4626771 | OA |
| GSM4626771_ACTGAACCAGCCTTGG-1  | GSM4626771 | OA |
| GSM4626771_ACTGAACGTGAGTATA-1  | GSM4626771 | OA |
| GSM4626771_ACTGAACGTGCAGACA-1  | GSM4626771 | OA |
| GSM4626771_ACTGAACGTTCGTTGA-1  | GSM4626771 | OA |
| GSM4626771_ACTGAACGTTTGTTC-1   | GSM4626771 | OA |
| GSM4626771_ACTGAACTCACTTCAT-1  | GSM4626771 | OA |
| GSM4626771_ACTGAGTAGCCACGCT-1  | GSM4626771 | OA |
| GSM4626771_ACTGAGTAGCTAGGCA-1  | GSM4626771 | OA |
| GSM4626771_ACTGAGTCAGATAATG-1  | GSM4626771 | OA |
| GSM4626771_ACTGAGTCATCCTAGA-1  | GSM4626771 | OA |
| GSM4626771_ACTGAGTCATGTCCTC-1  | GSM4626771 | OA |
| GSM4626771_ACTGAGTCATTAGCCA-1  | GSM4626771 | OA |
| GSM4626771_ACTGAGTGTGAAGGCT-1  | GSM4626771 | OA |
| GSM4626771_ACTGAGTTCCGAATGT-1  | GSM4626771 | OA |
| GSM4626771_ACTGATGAGAAGGACA-1  | GSM4626771 | OA |
| GSM4626771_ACTGATGAGCGTGAGT-1  | GSM4626771 | OA |



|                                |            |    |
|--------------------------------|------------|----|
| GSM4626771_ACTGATGAGCTAGGCA-1  | GSM4626771 | OA |
| GSM4626771_ACTGATGGTCAAGCGA-1  | GSM4626771 | OA |
| GSM4626771_ACTGATGTCTTGTACT-1  | GSM4626771 | OA |
| GSM4626771_ACTGATGTCTTTACGT-1  | GSM4626771 | OA |
| GSM4626771_ACTGCTCAGACCACGA-1  | GSM4626771 | OA |
| GSM4626771_ACTGCTCAGCAGGCTA-1  | GSM4626771 | OA |
| GSM4626771_ACTGCTCAGCTCCTTC-1  | GSM4626771 | OA |
| GSM4626771_ACTGCTCGTCACTTCC-1  | GSM4626771 | OA |
| GSM4626771_ACTGCTCGTTGAGGTG-1  | GSM4626771 | OA |
| GSM4626771_ACTGCTCTCAAGGTA-1   | GSM4626771 | OA |
| GSM4626771_ACTGCTCTCACCAGGC-1  | GSM4626771 | OA |
| GSM4626771_ACTGCTCTCAGGCCCA-1  | GSM4626771 | OA |
| GSM4626771_ACTGCTCTCTACTATC-1  | GSM4626771 | OA |
| GSM4626771_ACTGCTCTCTGCAAGT-1  | GSM4626771 | OA |
| GSM4626771_ACTGTCCCAACTTGAC-1  | GSM4626771 | OA |
| GSM4626771_ACTGTCCCAATCTGCA-1  | GSM4626771 | OA |
| GSM4626771_ACTGTCCCACGAAGCA-1  | GSM4626771 | OA |
| GSM4626771_ACTGTCCCAGCGAACA-1  | GSM4626771 | OA |
| GSM4626771_ACTGTCCGTACGCTGC-1  | GSM4626771 | OA |
| GSM4626771_ACTGTCCGTCTGATCA-1  | GSM4626771 | OA |
| GSM4626771_ACTGTCCGTTTGGGCC-1  | GSM4626771 | OA |
| GSM4626771_ACTTACTAGCCCAGCT-1  | GSM4626771 | OA |
| GSM4626771_ACTTACTCAACACGCC-1  | GSM4626771 | OA |
| GSM4626771_ACTTACTCACAGACAG-1  | GSM4626771 | OA |
| GSM4626771_ACTTACTCAGCCAATT-1  | GSM4626771 | OA |
| GSM4626771_ACTTACTGTAGCAAAT-1  | GSM4626771 | OA |
| GSM4626771_ACTTACTGTCAGAAGC-1  | GSM4626771 | OA |
| GSM4626771_ACTTACTTCAAAGACA-1  | GSM4626771 | OA |
| GSM4626771_ACTTACTTCGAGCAA-1   | GSM4626771 | OA |
| GSM4626771_ACTTACTTCTTCAACT-1  | GSM4626771 | OA |
| GSM4626771_ACTTGTTAGAAGGGTA-1  | GSM4626771 | OA |
| GSM4626771_ACTTGTTAGCATCATC-1  | GSM4626771 | OA |
| GSM4626771_ACTTGTTAGCTGCCCA-1  | GSM4626771 | OA |
| GSM4626771_ACTTGTTACGAAATA-1   | GSM4626771 | OA |
| GSM4626771_ACTTGTTACAGTCAGAG-1 | GSM4626771 | OA |
| GSM4626771_ACTTGTTATCTCGCT-1   | GSM4626771 | OA |
| GSM4626771_ACTTGTTTCGACGAA-1   | GSM4626771 | OA |
| GSM4626771_ACTTGTTTCTACTTAC-1  | GSM4626771 | OA |
| GSM4626771_ACTTGTTTCTGCAGTA-1  | GSM4626771 | OA |
| GSM4626771_ACTTGTTTCTGGTGTA-1  | GSM4626771 | OA |
| GSM4626771_ACTTTCAAGAAGGTGA-1  | GSM4626771 | OA |
| GSM4626771_ACTTTCAAGATATGCA-1  | GSM4626771 | OA |
| GSM4626771_ACTTTCAAGCTCCCAG-1  | GSM4626771 | OA |
| GSM4626771_ACTTTCAGTCCCTTGT-1  | GSM4626771 | OA |
| GSM4626771_ACTTTCAGTTATCGGT-1  | GSM4626771 | OA |
| GSM4626771_ACTTTCAGTTGCGTTA-1  | GSM4626771 | OA |
| GSM4626771_ACTTTCATCAATCTCT-1  | GSM4626771 | OA |
| GSM4626771_ACTTTCATCCGTCAA-1   | GSM4626771 | OA |
| GSM4626771_ACTTTCATCTGCTTGC-1  | GSM4626771 | OA |
| GSM4626771_AGAATAGAGATGGCGT-1  | GSM4626771 | OA |
| GSM4626771_AGAATAGAGCAATATG-1  | GSM4626771 | OA |
| GSM4626771_AGAATAGAGCGATCCC-1  | GSM4626771 | OA |
| GSM4626771_AGAATAGAGGAACTGC-1  | GSM4626771 | OA |
| GSM4626771_AGAATAGAGGAGTTTA-1  | GSM4626771 | OA |
| GSM4626771_AGAATAGCAGGGAGAG-1  | GSM4626771 | OA |
| GSM4626771_AGAATAGCATGCTAGT-1  | GSM4626771 | OA |
| GSM4626771_AGAATAGGTGCAGTAG-1  | GSM4626771 | OA |

|                                |            |    |
|--------------------------------|------------|----|
| GSM4626771_AGAATAGGTTCGGCAC-1  | GSM4626771 | OA |
| GSM4626771_AGAATAGTCACCTCGT-1  | GSM4626771 | OA |
| GSM4626771_AGAATAGTCTGGAGCC-1  | GSM4626771 | OA |
| GSM4626771_AGACGTTAGGGCTTGA-1  | GSM4626771 | OA |
| GSM4626771_AGACGTTAGTGTGGCA-1  | GSM4626771 | OA |
| GSM4626771_AGACGTTGTAGAAAGG-1  | GSM4626771 | OA |
| GSM4626771_AGACGTTGTCTCCCTA-1  | GSM4626771 | OA |
| GSM4626771_AGACGTTTCCCAGGTG-1  | GSM4626771 | OA |
| GSM4626771_AGACGTTTCCCTTGTG-1  | GSM4626771 | OA |
| GSM4626771_AGACGTTTTCGAGAACG-1 | GSM4626771 | OA |
| GSM4626771_AGAGCGAAGCCAGAAC-1  | GSM4626771 | OA |
| GSM4626771_AGAGCGACAAGTTCTG-1  | GSM4626771 | OA |
| GSM4626771_AGAGCGACACATCCAA-1  | GSM4626771 | OA |
| GSM4626771_AGAGCGAGTCCGAACC-1  | GSM4626771 | OA |
| GSM4626771_AGAGCGAGTCCGAAGA-1  | GSM4626771 | OA |
| GSM4626771_AGAGCGAGTCTAGTGT-1  | GSM4626771 | OA |
| GSM4626771_AGAGCGATCAGGTAAA-1  | GSM4626771 | OA |
| GSM4626771_AGAGCGATCATGCATG-1  | GSM4626771 | OA |
| GSM4626771_AGAGCGATCCGCATAA-1  | GSM4626771 | OA |
| GSM4626771_AGAGCGATCCGGCACA-1  | GSM4626771 | OA |
| GSM4626771_AGAGCGATCCTTGGTC-1  | GSM4626771 | OA |
| GSM4626771_AGAGCGATCTAACTTC-1  | GSM4626771 | OA |
| GSM4626771_AGAGCTTCAATGGACG-1  | GSM4626771 | OA |
| GSM4626771_AGAGCTTCACGGATAG-1  | GSM4626771 | OA |
| GSM4626771_AGAGCTTCATTCTCAT-1  | GSM4626771 | OA |
| GSM4626771_AGAGCTTTCTACTCAT-1  | GSM4626771 | OA |
| GSM4626771_AGAGCTTTCTCATTCA-1  | GSM4626771 | OA |
| GSM4626771_AGAGCTTTCTGCCCTA-1  | GSM4626771 | OA |
| GSM4626771_AGAGTGGAGGCAATTA-1  | GSM4626771 | OA |
| GSM4626771_AGAGTGGAGTACTTGC-1  | GSM4626771 | OA |
| GSM4626771_AGAGTGGCAGCCTTGG-1  | GSM4626771 | OA |
| GSM4626771_AGAGTGGGTCACCTCC-1  | GSM4626771 | OA |
| GSM4626771_AGAGTGGGTCGAACAG-1  | GSM4626771 | OA |
| GSM4626771_AGAGTGGTTCGGTTAAC-1 | GSM4626771 | OA |
| GSM4626771_AGAGTGGTCTGGAGCC-1  | GSM4626771 | OA |
| GSM4626771_AGATCTGAGAACAAC-1   | GSM4626771 | OA |
| GSM4626771_AGATCTGAGAGCTATA-1  | GSM4626771 | OA |
| GSM4626771_AGATCTGAGTAGCGGT-1  | GSM4626771 | OA |
| GSM4626771_AGATCTGAGTCATGCT-1  | GSM4626771 | OA |
| GSM4626771_AGATCTGCAGCCTTTC-1  | GSM4626771 | OA |
| GSM4626771_AGATCTGCAGTGGGAT-1  | GSM4626771 | OA |
| GSM4626771_AGATCTGCATGCCGA-1   | GSM4626771 | OA |
| GSM4626771_AGATCTGGTGTGGTTT-1  | GSM4626771 | OA |
| GSM4626771_AGATCTGGTTATCACG-1  | GSM4626771 | OA |
| GSM4626771_AGATCTGGTTCAGACT-1  | GSM4626771 | OA |
| GSM4626771_AGATCTGTCAACGCTA-1  | GSM4626771 | OA |
| GSM4626771_AGATCTGTCACTGGGC-1  | GSM4626771 | OA |
| GSM4626771_AGATCTGTGCGATCCCT-1 | GSM4626771 | OA |
| GSM4626771_AGATCTGTGCGGATC-1   | GSM4626771 | OA |
| GSM4626771_AGATCTGTGCGCGCAT-1  | GSM4626771 | OA |
| GSM4626771_AGATTGCAGCCAGAAC-1  | GSM4626771 | OA |
| GSM4626771_AGATTGCAGGGAAACA-1  | GSM4626771 | OA |
| GSM4626771_AGATTGCCAAGAGGCT-1  | GSM4626771 | OA |
| GSM4626771_AGATTGCCACAGAGGT-1  | GSM4626771 | OA |
| GSM4626771_AGATTGCCACAGATTC-1  | GSM4626771 | OA |
| GSM4626771_AGATTGCCATGGATGG-1  | GSM4626771 | OA |
| GSM4626771_AGATTGCGTCACACGC-1  | GSM4626771 | OA |

|                                |            |    |
|--------------------------------|------------|----|
| GSM4626771_AGATTGCGTCTTCAAG-1  | GSM4626771 | OA |
| GSM4626771_AGATTGCGTCTTCTCG-1  | GSM4626771 | OA |
| GSM4626771_AGATTGCGTGAGGCTA-1  | GSM4626771 | OA |
| GSM4626771_AGATTGCGTGATAAGT-1  | GSM4626771 | OA |
| GSM4626771_AGATTGCTCGATCCCT-1  | GSM4626771 | OA |
| GSM4626771_AGATTGCTCGGTTAAC-1  | GSM4626771 | OA |
| GSM4626771_AGCAGCCAGAAGGTTT-1  | GSM4626771 | OA |
| GSM4626771_AGCAGCCAGACCTAGG-1  | GSM4626771 | OA |
| GSM4626771_AGCAGCCAGCTAGTTC-1  | GSM4626771 | OA |
| GSM4626771_AGCAGCCAGTTATCGC-1  | GSM4626771 | OA |
| GSM4626771_AGCAGCCAGTTGTCGT-1  | GSM4626771 | OA |
| GSM4626771_AGCAGCCCACAACGTT-1  | GSM4626771 | OA |
| GSM4626771_AGCAGCCCAGTAGAGC-1  | GSM4626771 | OA |
| GSM4626771_AGCAGCCCATTCTTAC-1  | GSM4626771 | OA |
| GSM4626771_AGCAGCCGTACAGTGG-1  | GSM4626771 | OA |
| GSM4626771_AGCAGCCGTTCCGTCT-1  | GSM4626771 | OA |
| GSM4626771_AGCAGCCTCAGTTCGA-1  | GSM4626771 | OA |
| GSM4626771_AGCAGCCTCGAACTGT-1  | GSM4626771 | OA |
| GSM4626771_AGCATACAGCTACCGC-1  | GSM4626771 | OA |
| GSM4626771_AGCATACAGTCTCCTC-1  | GSM4626771 | OA |
| GSM4626771_AGCATACCACTCTGTC-1  | GSM4626771 | OA |
| GSM4626771_AGCATACCAGCTCCGA-1  | GSM4626771 | OA |
| GSM4626771_AGCATACCATTAGGCT-1  | GSM4626771 | OA |
| GSM4626771_AGCATACGTGTTAAGA-1  | GSM4626771 | OA |
| GSM4626771_AGCATACGTTCAGCGC-1  | GSM4626771 | OA |
| GSM4626771_AGCATACTCTCTAGGA-1  | GSM4626771 | OA |
| GSM4626771_AGCCTAAAGTAGATGT-1  | GSM4626771 | OA |
| GSM4626771_AGCCTAACAAAGCGAGT-1 | GSM4626771 | OA |
| GSM4626771_AGCCTAACATGGTAGG-1  | GSM4626771 | OA |
| GSM4626771_AGCCTAAGTACAGTTC-1  | GSM4626771 | OA |
| GSM4626771_AGCCTAAGTTCCTCCA-1  | GSM4626771 | OA |
| GSM4626771_AGCCTAATCAGCTTAG-1  | GSM4626771 | OA |
| GSM4626771_AGCCTAATCCGGCACA-1  | GSM4626771 | OA |
| GSM4626771_AGCCTAATCGTGGGAA-1  | GSM4626771 | OA |
| GSM4626771_AGCCTAATCTGCGGCA-1  | GSM4626771 | OA |
| GSM4626771_AGCGGTCCAGATGTAAC-1 | GSM4626771 | OA |
| GSM4626771_AGCGGTCCACGAAATA-1  | GSM4626771 | OA |
| GSM4626771_AGCGGTCCACTCTGTC-1  | GSM4626771 | OA |
| GSM4626771_AGCGGTCCATGGAATA-1  | GSM4626771 | OA |
| GSM4626771_AGCGGTCCGTGAGGGTT-1 | GSM4626771 | OA |
| GSM4626771_AGCGGTCCGTTGAACTC-1 | GSM4626771 | OA |
| GSM4626771_AGCGGTCTCCACGACG-1  | GSM4626771 | OA |
| GSM4626771_AGCGGTCTCCGACTT-1   | GSM4626771 | OA |
| GSM4626771_AGCGGTCTCTGGTGTA-1  | GSM4626771 | OA |
| GSM4626771_AGCGGTCTCTGTCTCG-1  | GSM4626771 | OA |
| GSM4626771_AGCGTATAGAAACCAT-1  | GSM4626771 | OA |
| GSM4626771_AGCGTATAGATGCCTT-1  | GSM4626771 | OA |
| GSM4626771_AGCGTATAGGCCGAAT-1  | GSM4626771 | OA |
| GSM4626771_AGCGTATCACCAGGCT-1  | GSM4626771 | OA |
| GSM4626771_AGCGTATCACCGGAAA-1  | GSM4626771 | OA |
| GSM4626771_AGCGTATGTACGAAAT-1  | GSM4626771 | OA |
| GSM4626771_AGCGTATTGAGAGGTG-1  | GSM4626771 | OA |
| GSM4626771_AGCGTATTGAGGTGCA-1  | GSM4626771 | OA |
| GSM4626771_AGCGTCGAGGGTATCG-1  | GSM4626771 | OA |
| GSM4626771_AGCGTCCGTCCGCTGTT-1 | GSM4626771 | OA |
| GSM4626771_AGCTCCTAGAGTGACC-1  | GSM4626771 | OA |
| GSM4626771_AGCTCCTAGTAACCCT-1  | GSM4626771 | OA |

|                                 |            |    |
|---------------------------------|------------|----|
| GSM4626771_AGCTCCTAGTTTGC GT-1  | GSM4626771 | OA |
| GSM4626771_AGCTCCTCAA ACTGTC-1  | GSM4626771 | OA |
| GSM4626771_AGCTCCTCAA AGGTGC-1  | GSM4626771 | OA |
| GSM4626771_AGCTCCTTCCA ACCAA-1  | GSM4626771 | OA |
| GSM4626771_AGCTCTCAGAA AGTGG-1  | GSM4626771 | OA |
| GSM4626771_AGCTCTCAGG CTAGCA-1  | GSM4626771 | OA |
| GSM4626771_AGCTCTCCA ACTGCTA-1  | GSM4626771 | OA |
| GSM4626771_AGCTCTCCAG ACTCGC-1  | GSM4626771 | OA |
| GSM4626771_AGCTCTCCAG GGATTG-1  | GSM4626771 | OA |
| GSM4626771_AGCTCTCCAG TCAGCC-1  | GSM4626771 | OA |
| GSM4626771_AGCTCTCGT AAGAGAG-1  | GSM4626771 | OA |
| GSM4626771_AGCTCTCGT AGCGTAG-1  | GSM4626771 | OA |
| GSM4626771_AGCTCTCTCG GAAACG-1  | GSM4626771 | OA |
| GSM4626771_AGCTCTCTCG TTGACA-1  | GSM4626771 | OA |
| GSM4626771_AGCTTGAAG GACATTA-1  | GSM4626771 | OA |
| GSM4626771_AGCTTGAAG GCGCTCT-1  | GSM4626771 | OA |
| GSM4626771_AGCTTGACA AGCGATG-1  | GSM4626771 | OA |
| GSM4626771_AGCTTGACA AGGTTTC-1  | GSM4626771 | OA |
| GSM4626771_AGCTTGAGT AACGTTTC-1 | GSM4626771 | OA |
| GSM4626771_AGCTTGAGT TCCACGG-1  | GSM4626771 | OA |
| GSM4626771_AGCTTGATC TTGTTTG-1  | GSM4626771 | OA |
| GSM4626771_AGGCCACAG GTCGGAT-1  | GSM4626771 | OA |
| GSM4626771_AGGCCACCA AAGGTGC-1  | GSM4626771 | OA |
| GSM4626771_AGGCCACCA AAGTGCG-1  | GSM4626771 | OA |
| GSM4626771_AGGCCACGT CACTGGC-1  | GSM4626771 | OA |
| GSM4626771_AGGCCACGT CTAGCCG-1  | GSM4626771 | OA |
| GSM4626771_AGGCCACGT CTCCACT-1  | GSM4626771 | OA |
| GSM4626771_AGGCCACGT CTCTCGT-1  | GSM4626771 | OA |
| GSM4626771_AGGCCACTC CTTGGTC-1  | GSM4626771 | OA |
| GSM4626771_AGGCCACTC GACAGCC-1  | GSM4626771 | OA |
| GSM4626771_AGGCCACTC TCGTTTA-1  | GSM4626771 | OA |
| GSM4626771_AGGCCACTC TTGCAAG-1  | GSM4626771 | OA |
| GSM4626771_AGGCCGTAG AAACGCC-1  | GSM4626771 | OA |
| GSM4626771_AGGCCGTAG ATAGCAT-1  | GSM4626771 | OA |
| GSM4626771_AGGCCGTAG GTCGGAT-1  | GSM4626771 | OA |
| GSM4626771_AGGCCGTAG TAGTGCG-1  | GSM4626771 | OA |
| GSM4626771_AGGCCGTAG TGCCAGA-1  | GSM4626771 | OA |
| GSM4626771_AGGCCGTAG TTAGCGG-1  | GSM4626771 | OA |
| GSM4626771_AGGCCGTCA ATCAGAA-1  | GSM4626771 | OA |
| GSM4626771_AGGCCGTCA CGACGAA-1  | GSM4626771 | OA |
| GSM4626771_AGGCCGTCA TCGGAAG-1  | GSM4626771 | OA |
| GSM4626771_AGGCCGTGT AAATGTG-1  | GSM4626771 | OA |
| GSM4626771_AGGCCGTGT ACTTCTT-1  | GSM4626771 | OA |
| GSM4626771_AGGCCGTGT CGAGATG-1  | GSM4626771 | OA |
| GSM4626771_AGGCCGTGT GATGCC-1   | GSM4626771 | OA |
| GSM4626771_AGGCCGTT CAACGAAA-1  | GSM4626771 | OA |
| GSM4626771_AGGCCGTT CAATAAGG-1  | GSM4626771 | OA |
| GSM4626771_AGGCCGTT CAGCAAG-1   | GSM4626771 | OA |
| GSM4626771_AGGCCGTT CCTATGTT-1  | GSM4626771 | OA |
| GSM4626771_AGGCCGTT CTACCTGC-1  | GSM4626771 | OA |
| GSM4626771_AGGCCGTT CTCAAGTG-1  | GSM4626771 | OA |
| GSM4626771_AGGGAGT AGTTGAGAT-1  | GSM4626771 | OA |
| GSM4626771_AGGGAGTCA TTTGCTT-1  | GSM4626771 | OA |
| GSM4626771_AGGGAGTGT ACCGAGA-1  | GSM4626771 | OA |
| GSM4626771_AGGGAGTGT CCTCCAT-1  | GSM4626771 | OA |
| GSM4626771_AGGGAGTGT GTCTGAT-1  | GSM4626771 | OA |
| GSM4626771_AGGGAGTGT GTTGAGG-1  | GSM4626771 | OA |

|                               |            |    |
|-------------------------------|------------|----|
| GSM4626771_AGGGAGTTCAGCTCGG-1 | GSM4626771 | OA |
| GSM4626771_AGGGAGTTCCTAACC-1  | GSM4626771 | OA |
| GSM4626771_AGGGAGTTCGCGGATC-1 | GSM4626771 | OA |
| GSM4626771_AGGGAGTTCTACTATC-1 | GSM4626771 | OA |
| GSM4626771_AGGGATGAGAGCTTCT-1 | GSM4626771 | OA |
| GSM4626771_AGGGATGCAACAACCT-1 | GSM4626771 | OA |
| GSM4626771_AGGGATGCACAGCGTC-1 | GSM4626771 | OA |
| GSM4626771_AGGGATGGTAAACGCG-1 | GSM4626771 | OA |
| GSM4626771_AGGGATGGTCGGCACT-1 | GSM4626771 | OA |
| GSM4626771_AGGGATGTCATCGCTC-1 | GSM4626771 | OA |
| GSM4626771_AGGGATGTCTTTCCTC-1 | GSM4626771 | OA |
| GSM4626771_AGGGTGACACTGAAGG-1 | GSM4626771 | OA |
| GSM4626771_AGGGTGACATTATCTC-1 | GSM4626771 | OA |
| GSM4626771_AGGGTGAGTCGACTAT-1 | GSM4626771 | OA |
| GSM4626771_AGGGTGAGTCTAGTGT-1 | GSM4626771 | OA |
| GSM4626771_AGGGTGATCCAAGCCG-1 | GSM4626771 | OA |
| GSM4626771_AGGGTGATCCCTAATT-1 | GSM4626771 | OA |
| GSM4626771_AGGTCATAGATCACGG-1 | GSM4626771 | OA |
| GSM4626771_AGGTCATAGCCAACAG-1 | GSM4626771 | OA |
| GSM4626771_AGGTCATAGGGTGTTG-1 | GSM4626771 | OA |
| GSM4626771_AGGTCATAGTGCGATG-1 | GSM4626771 | OA |
| GSM4626771_AGGTCATCAAACAACA-1 | GSM4626771 | OA |
| GSM4626771_AGGTCATCACCTTGTC-1 | GSM4626771 | OA |
| GSM4626771_AGGTCATCATATGCTG-1 | GSM4626771 | OA |
| GSM4626771_AGGTCATCATCCGGGT-1 | GSM4626771 | OA |
| GSM4626771_AGGTCATCATGGTCAT-1 | GSM4626771 | OA |
| GSM4626771_AGGTCATTACCAGGC-1  | GSM4626771 | OA |
| GSM4626771_AGGTCATTGCTTAGA-1  | GSM4626771 | OA |
| GSM4626771_AGGTCATTGCTGTTTC-1 | GSM4626771 | OA |
| GSM4626771_AGGTCATTCTGGTTCC-1 | GSM4626771 | OA |
| GSM4626771_AGGTCCGAGAGTCGGT-1 | GSM4626771 | OA |
| GSM4626771_AGGTCCGAGCCCGAAA-1 | GSM4626771 | OA |
| GSM4626771_AGGTCCGAGTAGGCCA-1 | GSM4626771 | OA |
| GSM4626771_AGGTCCGCACATTAGC-1 | GSM4626771 | OA |
| GSM4626771_AGGTCCGCAGGAATGC-1 | GSM4626771 | OA |
| GSM4626771_AGGTCCGCATTAGCCA-1 | GSM4626771 | OA |
| GSM4626771_AGGTCCGGTATCTGCA-1 | GSM4626771 | OA |
| GSM4626771_AGGTCCGGTCATCGGC-1 | GSM4626771 | OA |
| GSM4626771_AGGTCCGGTCCAGTTA-1 | GSM4626771 | OA |
| GSM4626771_AGGTCCGGTTAAAGTG-1 | GSM4626771 | OA |
| GSM4626771_AGGTCCGGTTATCCGA-1 | GSM4626771 | OA |
| GSM4626771_AGGTCCGTCAATAAGG-1 | GSM4626771 | OA |
| GSM4626771_AGGTCCGTGGAATA-1   | GSM4626771 | OA |
| GSM4626771_AGTAGTCAGACTAGGC-1 | GSM4626771 | OA |
| GSM4626771_AGTAGTCAGGGCACTA-1 | GSM4626771 | OA |
| GSM4626771_AGTAGTCCAGTGGGAT-1 | GSM4626771 | OA |
| GSM4626771_AGTAGTCCATCTCGCT-1 | GSM4626771 | OA |
| GSM4626771_AGTAGTCGTTCCGTCT-1 | GSM4626771 | OA |
| GSM4626771_AGTAGTCTCAGTTCGA-1 | GSM4626771 | OA |
| GSM4626771_AGTAGTCTCGACGGAA-1 | GSM4626771 | OA |
| GSM4626771_AGTAGTCTCTGCTGTC-1 | GSM4626771 | OA |
| GSM4626771_AGTCTTTAGTGGGATC-1 | GSM4626771 | OA |
| GSM4626771_AGTCTTTCAAGGCTCC-1 | GSM4626771 | OA |
| GSM4626771_AGTCTTTCAGTATGCT-1 | GSM4626771 | OA |
| GSM4626771_AGTCTTTGTAGCTGCC-1 | GSM4626771 | OA |
| GSM4626771_AGTCTTTGTAGGCTGA-1 | GSM4626771 | OA |
| GSM4626771_AGTCTTTGTATGCCG-1  | GSM4626771 | OA |

|                               |            |    |
|-------------------------------|------------|----|
| GSM4626771_AGTCTTTGTGCAACTT-1 | GSM4626771 | OA |
| GSM4626771_AGTCTTTGTGGCTCCA-1 | GSM4626771 | OA |
| GSM4626771_AGTGAGGAGTCTCAAC-1 | GSM4626771 | OA |
| GSM4626771_AGTGAGGAGTGGGCTA-1 | GSM4626771 | OA |
| GSM4626771_AGTGAGGCAATCCGAT-1 | GSM4626771 | OA |
| GSM4626771_AGTGAGGCACGGTAGA-1 | GSM4626771 | OA |
| GSM4626771_AGTGAGGCATACAGCT-1 | GSM4626771 | OA |
| GSM4626771_AGTGAGGGTCTTCGTC-1 | GSM4626771 | OA |
| GSM4626771_AGTGAGGGTTGGGACA-1 | GSM4626771 | OA |
| GSM4626771_AGTGAGGTCGGCTTGG-1 | GSM4626771 | OA |
| GSM4626771_AGTGAGGTCTCAACTT-1 | GSM4626771 | OA |
| GSM4626771_AGTGGGACAATAGAGT-1 | GSM4626771 | OA |
| GSM4626771_AGTGGGACACATCTTT-1 | GSM4626771 | OA |
| GSM4626771_AGTGGGAGTCTAGTCA-1 | GSM4626771 | OA |
| GSM4626771_AGTGGGAGTTAAGGGC-1 | GSM4626771 | OA |
| GSM4626771_AGTGGGAGTTGTGGAG-1 | GSM4626771 | OA |
| GSM4626771_AGTGGGAGTTTGTTC-1  | GSM4626771 | OA |
| GSM4626771_AGTGGGATCACGCATA-1 | GSM4626771 | OA |
| GSM4626771_AGTGTCAAGACGACGT-1 | GSM4626771 | OA |
| GSM4626771_AGTGTCAAGAGCTATA-1 | GSM4626771 | OA |
| GSM4626771_AGTGTCAAGATCGATA-1 | GSM4626771 | OA |
| GSM4626771_AGTGTCAAGCCGGTAA-1 | GSM4626771 | OA |
| GSM4626771_AGTGTCAAGGCAGTCA-1 | GSM4626771 | OA |
| GSM4626771_AGTGTCACAAGCCCAC-1 | GSM4626771 | OA |
| GSM4626771_AGTGTCACACATGTGT-1 | GSM4626771 | OA |
| GSM4626771_AGTGTCACACGAAATA-1 | GSM4626771 | OA |
| GSM4626771_AGTGTCACACTAGTAC-1 | GSM4626771 | OA |
| GSM4626771_AGTGTCACAGTTTCA-1  | GSM4626771 | OA |
| GSM4626771_AGTGTCACATTTCACT-1 | GSM4626771 | OA |
| GSM4626771_AGTGTCAGTTTGCATG-1 | GSM4626771 | OA |
| GSM4626771_AGTGTCATCAAACCGT-1 | GSM4626771 | OA |
| GSM4626771_AGTTGGTAGCCCGAAA-1 | GSM4626771 | OA |
| GSM4626771_AGTTGGTAGCGTCTAT-1 | GSM4626771 | OA |
| GSM4626771_AGTTGGTAGGGTATCG-1 | GSM4626771 | OA |
| GSM4626771_AGTTGGTCAACGCCA-1  | GSM4626771 | OA |
| GSM4626771_AGTTGGTCAATGAATG-1 | GSM4626771 | OA |
| GSM4626771_AGTTGGTGTTCCACGG-1 | GSM4626771 | OA |
| GSM4626771_AGTTGGTTCAACACCA-1 | GSM4626771 | OA |
| GSM4626771_AGTTGGTTCACCTCGT-1 | GSM4626771 | OA |
| GSM4626771_ATAACGCAGAAACGAG-1 | GSM4626771 | OA |
| GSM4626771_ATAACGCCATCCCATC-1 | GSM4626771 | OA |
| GSM4626771_ATAACGCCATGTAAGA-1 | GSM4626771 | OA |
| GSM4626771_ATAACGCGTACAGTTC-1 | GSM4626771 | OA |
| GSM4626771_ATAACGCGTGCTTCTC-1 | GSM4626771 | OA |
| GSM4626771_ATAACGCTCATCGATG-1 | GSM4626771 | OA |
| GSM4626771_ATAAGAGAGATATACG-1 | GSM4626771 | OA |
| GSM4626771_ATAAGAGCACCCATTC-1 | GSM4626771 | OA |
| GSM4626771_ATAAGAGCACCTCGGA-1 | GSM4626771 | OA |
| GSM4626771_ATAAGAGCAGATGGCA-1 | GSM4626771 | OA |
| GSM4626771_ATAAGAGCATGAGCGA-1 | GSM4626771 | OA |
| GSM4626771_ATAAGAGGTCGGCTCA-1 | GSM4626771 | OA |
| GSM4626771_ATAAGAGTCCCTCTTT-1 | GSM4626771 | OA |
| GSM4626771_ATAAGAGTCGCCAAAT-1 | GSM4626771 | OA |
| GSM4626771_ATAGACCAGATCCTGT-1 | GSM4626771 | OA |
| GSM4626771_ATAGACCAGCGAAGGG-1 | GSM4626771 | OA |
| GSM4626771_ATAGACCCAAGAGTCG-1 | GSM4626771 | OA |
| GSM4626771_ATAGACCCATCTCGCT-1 | GSM4626771 | OA |

|                                |            |    |
|--------------------------------|------------|----|
| GSM4626771_ATAGACCGTATAAACG-1  | GSM4626771 | OA |
| GSM4626771_ATAGACCGTGACGGTA-1  | GSM4626771 | OA |
| GSM4626771_ATAGACCGTTCCTTG-1   | GSM4626771 | OA |
| GSM4626771_ATAGACCTCAGAAATG-1  | GSM4626771 | OA |
| GSM4626771_ATAGACCTCCAAACAC-1  | GSM4626771 | OA |
| GSM4626771_ATAGACCTCGCCATAA-1  | GSM4626771 | OA |
| GSM4626771_ATCACGAAGAAACGCC-1  | GSM4626771 | OA |
| GSM4626771_ATCACGAAGAGCTTCT-1  | GSM4626771 | OA |
| GSM4626771_ATCACGACAATAGCAA-1  | GSM4626771 | OA |
| GSM4626771_ATCACGACACAGACTT-1  | GSM4626771 | OA |
| GSM4626771_ATCACGAGTTCCACGG-1  | GSM4626771 | OA |
| GSM4626771_ATCACGAGTTCTCATT-1  | GSM4626771 | OA |
| GSM4626771_ATCACGATCCTTTACA-1  | GSM4626771 | OA |
| GSM4626771_ATCACGATCTCCAACC-1  | GSM4626771 | OA |
| GSM4626771_ATCATCTCAGCTGCTG-1  | GSM4626771 | OA |
| GSM4626771_ATCATCTCATAGACTC-1  | GSM4626771 | OA |
| GSM4626771_ATCATCTCATCGACGC-1  | GSM4626771 | OA |
| GSM4626771_ATCATCTGTACCGTAT-1  | GSM4626771 | OA |
| GSM4626771_ATCATCTGTCCAGTGC-1  | GSM4626771 | OA |
| GSM4626771_ATCATCTGTTCTCCA-1   | GSM4626771 | OA |
| GSM4626771_ATCATCTTCAACCATG-1  | GSM4626771 | OA |
| GSM4626771_ATCATCTTCCAAAGTC-1  | GSM4626771 | OA |
| GSM4626771_ATCATCTTCCAGAGGA-1  | GSM4626771 | OA |
| GSM4626771_ATCATCTTCCGCGGTA-1  | GSM4626771 | OA |
| GSM4626771_ATCATGGAGACTACAA-1  | GSM4626771 | OA |
| GSM4626771_ATCATGGAGCGCCTCA-1  | GSM4626771 | OA |
| GSM4626771_ATCATGGCAATGAAAC-1  | GSM4626771 | OA |
| GSM4626771_ATCATGGGTCATATGC-1  | GSM4626771 | OA |
| GSM4626771_ATCATGGGTTCGAATC-1  | GSM4626771 | OA |
| GSM4626771_ATCATGGTCGTTACGA-1  | GSM4626771 | OA |
| GSM4626771_ATCCACCAGACTGTAA-1  | GSM4626771 | OA |
| GSM4626771_ATCCACCAGATAGTCA-1  | GSM4626771 | OA |
| GSM4626771_ATCCACCAGTGTTAGA-1  | GSM4626771 | OA |
| GSM4626771_ATCCACCCATTTGCTT-1  | GSM4626771 | OA |
| GSM4626771_ATCCACCGTAGGCTGA-1  | GSM4626771 | OA |
| GSM4626771_ATCCACCGTAGTACCT-1  | GSM4626771 | OA |
| GSM4626771_ATCCACCGTCACACGC-1  | GSM4626771 | OA |
| GSM4626771_ATCCACCGTTATCACG-1  | GSM4626771 | OA |
| GSM4626771_ATCCACCGTTGTGGCC-1  | GSM4626771 | OA |
| GSM4626771_ATCCGAAAGAGGGCTT-1  | GSM4626771 | OA |
| GSM4626771_ATCCGAAAGTAGGAGTC-1 | GSM4626771 | OA |
| GSM4626771_ATCCGAAAGTGGTACAG-1 | GSM4626771 | OA |
| GSM4626771_ATCCGAATCTGCTTGC-1  | GSM4626771 | OA |
| GSM4626771_ATCGAGTAGCCGATTT-1  | GSM4626771 | OA |
| GSM4626771_ATCGAGTAGCTAGGCA-1  | GSM4626771 | OA |
| GSM4626771_ATCGAGTAGGCAGTCA-1  | GSM4626771 | OA |
| GSM4626771_ATCGAGTAGGTGCTTT-1  | GSM4626771 | OA |
| GSM4626771_ATCGAGTAGTAGCCGA-1  | GSM4626771 | OA |
| GSM4626771_ATCGAGTCAAGGACTG-1  | GSM4626771 | OA |
| GSM4626771_ATCGAGTCAAGTAATG-1  | GSM4626771 | OA |
| GSM4626771_ATCGAGTCAGTTTACG-1  | GSM4626771 | OA |
| GSM4626771_ATCGAGTCATCTATGG-1  | GSM4626771 | OA |
| GSM4626771_ATCGAGTGTGAAAGA-1   | GSM4626771 | OA |
| GSM4626771_ATCGAGTTCAAGGCTT-1  | GSM4626771 | OA |
| GSM4626771_ATCGAGTTCATTTGGG-1  | GSM4626771 | OA |
| GSM4626771_ATCGAGTTCAGAGGA-1   | GSM4626771 | OA |
| GSM4626771_ATCGAGTTCGAGCCA-1   | GSM4626771 | OA |

|                                |            |    |
|--------------------------------|------------|----|
| GSM4626771_ATCGAGTTCCGCAGTG-1  | GSM4626771 | OA |
| GSM4626771_ATCGAGTTCCGCGGTA-1  | GSM4626771 | OA |
| GSM4626771_ATCGAGTTCTGAGTGT-1  | GSM4626771 | OA |
| GSM4626771_ATCGAGTTCTGCAAGT-1  | GSM4626771 | OA |
| GSM4626771_ATCTACTAGCTGTCTA-1  | GSM4626771 | OA |
| GSM4626771_ATCTACTAGGACCACA-1  | GSM4626771 | OA |
| GSM4626771_ATCTACTAGGCCCGTT-1  | GSM4626771 | OA |
| GSM4626771_ATCTACTAGTACACCT-1  | GSM4626771 | OA |
| GSM4626771_ATCTACTCAGACACTT-1  | GSM4626771 | OA |
| GSM4626771_ATCTACTGTACCAGTT-1  | GSM4626771 | OA |
| GSM4626771_ATCTACTTCAAACCGT-1  | GSM4626771 | OA |
| GSM4626771_ATCTACTTCAACCAAC-1  | GSM4626771 | OA |
| GSM4626771_ATCTACTTCGCACTCT-1  | GSM4626771 | OA |
| GSM4626771_ATCTGCCAGTAGGTGC-1  | GSM4626771 | OA |
| GSM4626771_ATCTGCCAGTGTCTCA-1  | GSM4626771 | OA |
| GSM4626771_ATCTGCCAGTTCGCGC-1  | GSM4626771 | OA |
| GSM4626771_ATCTGCCAGACGCAA-1   | GSM4626771 | OA |
| GSM4626771_ATCTGCCAGCTTAAC-1   | GSM4626771 | OA |
| GSM4626771_ATCTGCCGTGTCAATC-1  | GSM4626771 | OA |
| GSM4626771_ATCTGCCGTTTGTTTC-1  | GSM4626771 | OA |
| GSM4626771_ATCTGCCTCTGGTATG-1  | GSM4626771 | OA |
| GSM4626771_ATGAGGGAGATCCCAT-1  | GSM4626771 | OA |
| GSM4626771_ATGAGGGCACAGTCGC-1  | GSM4626771 | OA |
| GSM4626771_ATGAGGGCATTGGTAC-1  | GSM4626771 | OA |
| GSM4626771_ATGAGGGGTGATAAAC-1  | GSM4626771 | OA |
| GSM4626771_ATGAGGGTCTACTTAC-1  | GSM4626771 | OA |
| GSM4626771_ATGAGGGTCTATCCTA-1  | GSM4626771 | OA |
| GSM4626771_ATGCGATAGAACAATC-1  | GSM4626771 | OA |
| GSM4626771_ATGCGATAGCTAGTGG-1  | GSM4626771 | OA |
| GSM4626771_ATGCGATAGTCGTTTG-1  | GSM4626771 | OA |
| GSM4626771_ATGGGAGAGAGCTGCA-1  | GSM4626771 | OA |
| GSM4626771_ATGGGAGAGAGGGATA-1  | GSM4626771 | OA |
| GSM4626771_ATGGGAGAGCGCTCCA-1  | GSM4626771 | OA |
| GSM4626771_ATGGGAGAGGCTATCT-1  | GSM4626771 | OA |
| GSM4626771_ATGGGAGCACCTCGGA-1  | GSM4626771 | OA |
| GSM4626771_ATGGGAGGTAGGCATG-1  | GSM4626771 | OA |
| GSM4626771_ATGGGAGGTCCAAGTT-1  | GSM4626771 | OA |
| GSM4626771_ATGGGAGGTTCGTCTTC-1 | GSM4626771 | OA |
| GSM4626771_ATGGGAGGTTATGTGC-1  | GSM4626771 | OA |
| GSM4626771_ATGGGAGTCCGCACTT-1  | GSM4626771 | OA |
| GSM4626771_ATGTGTGAGGTTCCCTA-1 | GSM4626771 | OA |
| GSM4626771_ATGTGTGCAAACCCAT-1  | GSM4626771 | OA |
| GSM4626771_ATGTGTGGTGCAACTT-1  | GSM4626771 | OA |
| GSM4626771_ATGTGTGGTTCCACAA-1  | GSM4626771 | OA |
| GSM4626771_ATGTGTGGTTGCTCCT-1  | GSM4626771 | OA |
| GSM4626771_ATGTGTGTCAACCACCT-1 | GSM4626771 | OA |
| GSM4626771_ATGTGTGTCAACCGTAA-1 | GSM4626771 | OA |
| GSM4626771_ATGTGTGTCCAGTATG-1  | GSM4626771 | OA |
| GSM4626771_ATTACTCAGAAGATTC-1  | GSM4626771 | OA |
| GSM4626771_ATTACTCAGATGTCGG-1  | GSM4626771 | OA |
| GSM4626771_ATTACTCAGCCACCTG-1  | GSM4626771 | OA |
| GSM4626771_ATTACTCCAAGGACTG-1  | GSM4626771 | OA |
| GSM4626771_ATTACTCCACAGGCCT-1  | GSM4626771 | OA |
| GSM4626771_ATTACTCCAGGTGGAT-1  | GSM4626771 | OA |
| GSM4626771_ATTACTCCATCGATGT-1  | GSM4626771 | OA |
| GSM4626771_ATTACTCGTCCGCACT-1  | GSM4626771 | OA |
| GSM4626771_ATTACTCGTTAGGGTG-1  | GSM4626771 | OA |



|                                |            |    |
|--------------------------------|------------|----|
| GSM4626771_ATTACTCTCCCTGACT-1  | GSM4626771 | OA |
| GSM4626771_ATTACTCTCTAACTCT-1  | GSM4626771 | OA |
| GSM4626771_ATTATCCAGAGTACAT-1  | GSM4626771 | OA |
| GSM4626771_ATTATCCAGATGGCGT-1  | GSM4626771 | OA |
| GSM4626771_ATTATCCAGCGTTTAC-1  | GSM4626771 | OA |
| GSM4626771_ATTATCCGTTAAGACA-1  | GSM4626771 | OA |
| GSM4626771_ATTATCCGTTACGGAG-1  | GSM4626771 | OA |
| GSM4626771_ATTATCCTCACGACTA-1  | GSM4626771 | OA |
| GSM4626771_ATTATCCTCAGTGCAT-1  | GSM4626771 | OA |
| GSM4626771_ATTATCCTCATGTAGC-1  | GSM4626771 | OA |
| GSM4626771_ATTCTACAGAAGCCCA-1  | GSM4626771 | OA |
| GSM4626771_ATTCTACAGGAAGTGC-1  | GSM4626771 | OA |
| GSM4626771_ATTCTACCAGGCTGAA-1  | GSM4626771 | OA |
| GSM4626771_ATTCTACCATTCTGC-1   | GSM4626771 | OA |
| GSM4626771_ATTCTACGTATAAACG-1  | GSM4626771 | OA |
| GSM4626771_ATTCTACGTTAGGGTG-1  | GSM4626771 | OA |
| GSM4626771_ATTCTACTCCTTGCCA-1  | GSM4626771 | OA |
| GSM4626771_ATTCTACTCGGCGCTA-1  | GSM4626771 | OA |
| GSM4626771_ATTCTACTCTCGCATC-1  | GSM4626771 | OA |
| GSM4626771_ATTGGACCAGCTCCGA-1  | GSM4626771 | OA |
| GSM4626771_ATTGGACCATGCGCAC-1  | GSM4626771 | OA |
| GSM4626771_ATTGGACGTGATAAAC-1  | GSM4626771 | OA |
| GSM4626771_ATTGGACTCAGGCAAG-1  | GSM4626771 | OA |
| GSM4626771_ATTGGACTCCTTTCTC-1  | GSM4626771 | OA |
| GSM4626771_ATTGGACTCGATAGAA-1  | GSM4626771 | OA |
| GSM4626771_ATTGGACTCGCAGGCT-1  | GSM4626771 | OA |
| GSM4626771_ATTGGACTCGGACAAG-1  | GSM4626771 | OA |
| GSM4626771_ATTGGACTCTGCTGCT-1  | GSM4626771 | OA |
| GSM4626771_ATTGGACTCTGTGCAA-1  | GSM4626771 | OA |
| GSM4626771_ATTGGTGAGAAACCTA-1  | GSM4626771 | OA |
| GSM4626771_ATTGGTGAGACTGGGT-1  | GSM4626771 | OA |
| GSM4626771_ATTGGTGAGCGTTTAC-1  | GSM4626771 | OA |
| GSM4626771_ATTGGTGAGGCACATG-1  | GSM4626771 | OA |
| GSM4626771_ATTGGTGAGGGATCTG-1  | GSM4626771 | OA |
| GSM4626771_ATTGGTGAGTGAAGTCT-1 | GSM4626771 | OA |
| GSM4626771_ATTGGTGAGTGTCCCG-1  | GSM4626771 | OA |
| GSM4626771_ATTGGTGACATTTCT-1   | GSM4626771 | OA |
| GSM4626771_ATTGGTGACGCTGTG-1   | GSM4626771 | OA |
| GSM4626771_ATTGGTGCATGACGGA-1  | GSM4626771 | OA |
| GSM4626771_ATTGGTGGTAAACGCG-1  | GSM4626771 | OA |
| GSM4626771_ATTGGTGGTAAGTGTA-1  | GSM4626771 | OA |
| GSM4626771_ATTGGTGTCCATTCTA-1  | GSM4626771 | OA |
| GSM4626771_ATTGGTGTCTCTAGC-1   | GSM4626771 | OA |
| GSM4626771_ATTGGTGTCTGCTGATA-1 | GSM4626771 | OA |
| GSM4626771_ATTGGTGTCTCCAGGG-1  | GSM4626771 | OA |
| GSM4626771_ATTTCTGAGCATCATC-1  | GSM4626771 | OA |
| GSM4626771_ATTTCTGAGCCGATTT-1  | GSM4626771 | OA |
| GSM4626771_ATTTCTGAGCTAAGAT-1  | GSM4626771 | OA |
| GSM4626771_ATTTCTGAGGCTAGGT-1  | GSM4626771 | OA |
| GSM4626771_ATTTCTGCAAATCCGT-1  | GSM4626771 | OA |
| GSM4626771_ATTTCTGCACAAGACG-1  | GSM4626771 | OA |
| GSM4626771_ATTTCTGCACTGAAGG-1  | GSM4626771 | OA |
| GSM4626771_ATTTCTGCAGGGTATG-1  | GSM4626771 | OA |
| GSM4626771_ATTTCTGCATGCATGT-1  | GSM4626771 | OA |
| GSM4626771_ATTTCTGGTCCGTCAG-1  | GSM4626771 | OA |
| GSM4626771_ATTTCTGGTCTCAACA-1  | GSM4626771 | OA |
| GSM4626771_ATTTCTGGTGTAAGTA-1  | GSM4626771 | OA |

|                                |            |    |
|--------------------------------|------------|----|
| GSM4626771_ATTTCTGGTTCCGTCT-1  | GSM4626771 | OA |
| GSM4626771_ATTTCTGTGCGCCAA-1   | GSM4626771 | OA |
| GSM4626771_ATTTCTGTCTCGAGTA-1  | GSM4626771 | OA |
| GSM4626771_ATTTCTGTCTTGTACT-1  | GSM4626771 | OA |
| GSM4626771_CAACCAAAGCAATCTC-1  | GSM4626771 | OA |
| GSM4626771_CAACCAAAGGATGCGT-1  | GSM4626771 | OA |
| GSM4626771_CAACCAAAGTACGTAA-1  | GSM4626771 | OA |
| GSM4626771_CAACCAAAGTCCGTAT-1  | GSM4626771 | OA |
| GSM4626771_CAACCAACATCACGAT-1  | GSM4626771 | OA |
| GSM4626771_CAACCAAGTCCAGTGC-1  | GSM4626771 | OA |
| GSM4626771_CAACCAAGTGTTGAGG-1  | GSM4626771 | OA |
| GSM4626771_CAACCAATCATGTCTT-1  | GSM4626771 | OA |
| GSM4626771_CAACCTCAGCTGATAA-1  | GSM4626771 | OA |
| GSM4626771_CAACCTCCATCCTTGC-1  | GSM4626771 | OA |
| GSM4626771_CAACCTCCATCTACGA-1  | GSM4626771 | OA |
| GSM4626771_CAACCTCGTCGCATCG-1  | GSM4626771 | OA |
| GSM4626771_CAACCTCTCAGCAACT-1  | GSM4626771 | OA |
| GSM4626771_CAACCTCTCAGTGTTG-1  | GSM4626771 | OA |
| GSM4626771_CAACTAGAGGTGGGTT-1  | GSM4626771 | OA |
| GSM4626771_CAACTAGAGTGTACCT-1  | GSM4626771 | OA |
| GSM4626771_CAACTAGAGTGTCTCA-1  | GSM4626771 | OA |
| GSM4626771_CAACTAGCAAGTTGTC-1  | GSM4626771 | OA |
| GSM4626771_CAACTAGCACTACAGT-1  | GSM4626771 | OA |
| GSM4626771_CAACTAGGTTAAGATG-1  | GSM4626771 | OA |
| GSM4626771_CAACTAGTCACAACGT-1  | GSM4626771 | OA |
| GSM4626771_CAACTAGTCGCGGATC-1  | GSM4626771 | OA |
| GSM4626771_CAACTAGTCTTTCCTC-1  | GSM4626771 | OA |
| GSM4626771_CAAGAAAAGCCGTCGT-1  | GSM4626771 | OA |
| GSM4626771_CAAGAAAAGGGCATGT-1  | GSM4626771 | OA |
| GSM4626771_CAAGAAAAGTCACGCC-1  | GSM4626771 | OA |
| GSM4626771_CAAGAAAAGTGACGG-1   | GSM4626771 | OA |
| GSM4626771_CAAGAAAAGTTCGCGC-1  | GSM4626771 | OA |
| GSM4626771_CAAGAAACAGGCGATA-1  | GSM4626771 | OA |
| GSM4626771_CAAGAAACATCCGTGG-1  | GSM4626771 | OA |
| GSM4626771_CAAGAAACATCGATGT-1  | GSM4626771 | OA |
| GSM4626771_CAAGAAACATTTGCC-1   | GSM4626771 | OA |
| GSM4626771_CAAGAAAGTCGCCATG-1  | GSM4626771 | OA |
| GSM4626771_CAAGAAAGTGAGGGAG-1  | GSM4626771 | OA |
| GSM4626771_CAAGAAAGTGATGTGG-1  | GSM4626771 | OA |
| GSM4626771_CAAGAAAGTGTTTCGAT-1 | GSM4626771 | OA |
| GSM4626771_CAAGATCAGCACCGCT-1  | GSM4626771 | OA |
| GSM4626771_CAAGATCAGCGATAGC-1  | GSM4626771 | OA |
| GSM4626771_CAAGATCAGGCGACAT-1  | GSM4626771 | OA |
| GSM4626771_CAAGATCAGGTAAACT-1  | GSM4626771 | OA |
| GSM4626771_CAAGATCAGTACACCT-1  | GSM4626771 | OA |
| GSM4626771_CAAGATCCACCACCAG-1  | GSM4626771 | OA |
| GSM4626771_CAAGATCCACGCGAAA-1  | GSM4626771 | OA |
| GSM4626771_CAAGATCGTCTCCACT-1  | GSM4626771 | OA |
| GSM4626771_CAAGATCTCACGGTTA-1  | GSM4626771 | OA |
| GSM4626771_CAAGATCTCAGCAACT-1  | GSM4626771 | OA |
| GSM4626771_CAAGGCCAGAACTCGG-1  | GSM4626771 | OA |
| GSM4626771_CAAGGCCAGTAGGCCA-1  | GSM4626771 | OA |
| GSM4626771_CAAGGCCAGTCCGGTC-1  | GSM4626771 | OA |
| GSM4626771_CAAGGCCCAAGCCTAT-1  | GSM4626771 | OA |
| GSM4626771_CAAGGCCCAAGGCTCC-1  | GSM4626771 | OA |
| GSM4626771_CAAGGCCCAAGGGTCA-1  | GSM4626771 | OA |
| GSM4626771_CAAGGCCCAGACAAAT-1  | GSM4626771 | OA |

|                                |            |    |
|--------------------------------|------------|----|
| GSM4626771_CAAGGCCAGCGAACA-1   | GSM4626771 | OA |
| GSM4626771_CAAGGCCGTAAGAGGA-1  | GSM4626771 | OA |
| GSM4626771_CAAGGCCGTAAGGGAA-1  | GSM4626771 | OA |
| GSM4626771_CAAGGCCGTCGAATCT-1  | GSM4626771 | OA |
| GSM4626771_CAAGGCCTCCAACCA-1   | GSM4626771 | OA |
| GSM4626771_CAAGTTGAGCGATAGC-1  | GSM4626771 | OA |
| GSM4626771_CAAGTTGCACATCTTT-1  | GSM4626771 | OA |
| GSM4626771_CAAGTTGTCAGCTCGG-1  | GSM4626771 | OA |
| GSM4626771_CAAGTTGTCCCTAATT-1  | GSM4626771 | OA |
| GSM4626771_CAAGTTGTCCGATATG-1  | GSM4626771 | OA |
| GSM4626771_CAAGTTGTCTATGTT-1   | GSM4626771 | OA |
| GSM4626771_CACAAACCAAATTGCC-1  | GSM4626771 | OA |
| GSM4626771_CACAAACCATTTCACT-1  | GSM4626771 | OA |
| GSM4626771_CACAAACGTCTAGCCG-1  | GSM4626771 | OA |
| GSM4626771_CACAAACTCACAAACC-1  | GSM4626771 | OA |
| GSM4626771_CACAAACTCAGCTCGG-1  | GSM4626771 | OA |
| GSM4626771_CACAAACTCGGTCCGA-1  | GSM4626771 | OA |
| GSM4626771_CACACAAAGAGGTTGC-1  | GSM4626771 | OA |
| GSM4626771_CACACAAAGCATCATC-1  | GSM4626771 | OA |
| GSM4626771_CACACAAAGCCCGAAA-1  | GSM4626771 | OA |
| GSM4626771_CACACAAAGTACGTAA-1  | GSM4626771 | OA |
| GSM4626771_CACACAACACCACCAG-1  | GSM4626771 | OA |
| GSM4626771_CACACAACACTGCCAG-1  | GSM4626771 | OA |
| GSM4626771_CACACAACATGAAGTA-1  | GSM4626771 | OA |
| GSM4626771_CACACAAGTAGGCTGA-1  | GSM4626771 | OA |
| GSM4626771_CACACAAGTGATGATA-1  | GSM4626771 | OA |
| GSM4626771_CACACAAGTTCCATGA-1  | GSM4626771 | OA |
| GSM4626771_CACACAAGTTCGCTAA-1  | GSM4626771 | OA |
| GSM4626771_CACACAATCAGGTAAA-1  | GSM4626771 | OA |
| GSM4626771_CACACAATCCACGTGG-1  | GSM4626771 | OA |
| GSM4626771_CACACAATCTAAGCCA-1  | GSM4626771 | OA |
| GSM4626771_CACACAATCTCCAGGG-1  | GSM4626771 | OA |
| GSM4626771_CACACCTAGTACTTGC-1  | GSM4626771 | OA |
| GSM4626771_CACACCTAGTTCGATC-1  | GSM4626771 | OA |
| GSM4626771_CACACCTCAGATTGCT-1  | GSM4626771 | OA |
| GSM4626771_CACACCTCAGGGCATA-1  | GSM4626771 | OA |
| GSM4626771_CACACCTCATCAGTAC-1  | GSM4626771 | OA |
| GSM4626771_CACACCTGTGGCAAAC-1  | GSM4626771 | OA |
| GSM4626771_CACACCTGTTCGGCAC-1  | GSM4626771 | OA |
| GSM4626771_CACACCTTCATTTCACT-1 | GSM4626771 | OA |
| GSM4626771_CACACCTTCCAGGTG-1   | GSM4626771 | OA |
| GSM4626771_CACACCTTCCGCATAA-1  | GSM4626771 | OA |
| GSM4626771_CACACCTTCGCGCCAA-1  | GSM4626771 | OA |
| GSM4626771_CACACCTTCTGAGGGA-1  | GSM4626771 | OA |
| GSM4626771_CACACTCAGAGCCTAG-1  | GSM4626771 | OA |
| GSM4626771_CACACTCAGTCTCGGC-1  | GSM4626771 | OA |
| GSM4626771_CACACTCAGTTAGGTA-1  | GSM4626771 | OA |
| GSM4626771_CACACTCCAAGGCTCC-1  | GSM4626771 | OA |
| GSM4626771_CACACTCCAGTATCTG-1  | GSM4626771 | OA |
| GSM4626771_CACACTCGTATATCCG-1  | GSM4626771 | OA |
| GSM4626771_CACACTCGTTAAGACA-1  | GSM4626771 | OA |
| GSM4626771_CACACTCGTTCCAACA-1  | GSM4626771 | OA |
| GSM4626771_CACACTCTCACAGTAC-1  | GSM4626771 | OA |
| GSM4626771_CACACTCTCTTGAGAC-1  | GSM4626771 | OA |
| GSM4626771_CACAGGCAGCCCTAAT-1  | GSM4626771 | OA |
| GSM4626771_CACAGGCAGGACGAAA-1  | GSM4626771 | OA |
| GSM4626771_CACAGGCAGTGTGAA-1   | GSM4626771 | OA |

|                                |            |    |
|--------------------------------|------------|----|
| GSM4626771_CACAGGCAGTTTGCCT-1  | GSM4626771 | OA |
| GSM4626771_CACAGGCCATTACCTT-1  | GSM4626771 | OA |
| GSM4626771_CACAGGCGTGACTACT-1  | GSM4626771 | OA |
| GSM4626771_CACAGGCGTGCAACTT-1  | GSM4626771 | OA |
| GSM4626771_CACAGGCGTTACTGAC-1  | GSM4626771 | OA |
| GSM4626771_CACAGGCGTTCGCGAC-1  | GSM4626771 | OA |
| GSM4626771_CACAGGCTCAGTCCCT-1  | GSM4626771 | OA |
| GSM4626771_CACAGGCTCCCTCTTT-1  | GSM4626771 | OA |
| GSM4626771_CACAGGCTCGAACTGT-1  | GSM4626771 | OA |
| GSM4626771_CACAGGCTCGTAGGAG-1  | GSM4626771 | OA |
| GSM4626771_CACAGGCTCGTGGTTCG-1 | GSM4626771 | OA |
| GSM4626771_CACAGTAAGAACAATC-1  | GSM4626771 | OA |
| GSM4626771_CACAGTAAGAGAGCTC-1  | GSM4626771 | OA |
| GSM4626771_CACAGTAAGCGATAGC-1  | GSM4626771 | OA |
| GSM4626771_CACAGTAAGCGTTGCC-1  | GSM4626771 | OA |
| GSM4626771_CACAGTAAGCTAACTC-1  | GSM4626771 | OA |
| GSM4626771_CACAGTAAGTGATCGG-1  | GSM4626771 | OA |
| GSM4626771_CACAGTACAAATTGCC-1  | GSM4626771 | OA |
| GSM4626771_CACAGTACACGGCTAC-1  | GSM4626771 | OA |
| GSM4626771_CACAGTACACTCAGGC-1  | GSM4626771 | OA |
| GSM4626771_CACAGTACATCTATGG-1  | GSM4626771 | OA |
| GSM4626771_CACAGTATCAGTTGAC-1  | GSM4626771 | OA |
| GSM4626771_CACAGTATCCGTACAA-1  | GSM4626771 | OA |
| GSM4626771_CACAGTATCTTGGGTA-1  | GSM4626771 | OA |
| GSM4626771_CACATAGAGATCCGAG-1  | GSM4626771 | OA |
| GSM4626771_CACATAGAGTCTTGCA-1  | GSM4626771 | OA |
| GSM4626771_CACATAGAGTGCGATG-1  | GSM4626771 | OA |
| GSM4626771_CACATAGCAAGTCTAC-1  | GSM4626771 | OA |
| GSM4626771_CACATAGCAATAGCGG-1  | GSM4626771 | OA |
| GSM4626771_CACATAGCATTGCTT-1   | GSM4626771 | OA |
| GSM4626771_CACATAGGTAGAGGAA-1  | GSM4626771 | OA |
| GSM4626771_CACATAGGTATCACCA-1  | GSM4626771 | OA |
| GSM4626771_CACATAGGTCCAAGTT-1  | GSM4626771 | OA |
| GSM4626771_CACATAGTCATGGTCA-1  | GSM4626771 | OA |
| GSM4626771_CACATAGTCGCACTCT-1  | GSM4626771 | OA |
| GSM4626771_CACATAGTCGTGGTTCG-1 | GSM4626771 | OA |
| GSM4626771_CACATAGTCTGGAGCC-1  | GSM4626771 | OA |
| GSM4626771_CACATAGTCTGTCCGT-1  | GSM4626771 | OA |
| GSM4626771_CACATTTAGAAGAAGC-1  | GSM4626771 | OA |
| GSM4626771_CACATTTAGGGTGTGT-1  | GSM4626771 | OA |
| GSM4626771_CACATTTAGGTAGCTG-1  | GSM4626771 | OA |
| GSM4626771_CACATTTTCATGAACCT-1 | GSM4626771 | OA |
| GSM4626771_CACATTTGTAGAGGAA-1  | GSM4626771 | OA |
| GSM4626771_CACATTTGTGAGAAGC-1  | GSM4626771 | OA |
| GSM4626771_CACATTTGTTACGACT-1  | GSM4626771 | OA |
| GSM4626771_CACATTTGTTAGAACA-1  | GSM4626771 | OA |
| GSM4626771_CACATTTGTTACCTC-1   | GSM4626771 | OA |
| GSM4626771_CACATTTTCATACGGT-1  | GSM4626771 | OA |
| GSM4626771_CACATTTTCATCTGTT-1  | GSM4626771 | OA |
| GSM4626771_CACATTTTCCTTGACC-1  | GSM4626771 | OA |
| GSM4626771_CACATTTTCGTTTATC-1  | GSM4626771 | OA |
| GSM4626771_CACCACTAGATACACA-1  | GSM4626771 | OA |
| GSM4626771_CACCACTCAAAGAATC-1  | GSM4626771 | OA |
| GSM4626771_CACCACTCACGGCGTT-1  | GSM4626771 | OA |
| GSM4626771_CACCACTCACTTCTGC-1  | GSM4626771 | OA |
| GSM4626771_CACCACTCAGTAACGG-1  | GSM4626771 | OA |
| GSM4626771_CACCACTGTCGCCATG-1  | GSM4626771 | OA |

|                                |            |    |
|--------------------------------|------------|----|
| GSM4626771_CACCACTGTGGGTATG-1  | GSM4626771 | OA |
| GSM4626771_CACCACTTCCAAAGTC-1  | GSM4626771 | OA |
| GSM4626771_CACCACTTCCATGCTC-1  | GSM4626771 | OA |
| GSM4626771_CACCACTTCCCTAAGTG-1 | GSM4626771 | OA |
| GSM4626771_CACCAGGAGAATCTCC-1  | GSM4626771 | OA |
| GSM4626771_CACCAGGAGGTGCTTT-1  | GSM4626771 | OA |
| GSM4626771_CACCAGGAGTGCGATG-1  | GSM4626771 | OA |
| GSM4626771_CACCAGGCAAGTCTGT-1  | GSM4626771 | OA |
| GSM4626771_CACCAGGCACGAGGTA-1  | GSM4626771 | OA |
| GSM4626771_CACCAGGCACGGTGTC-1  | GSM4626771 | OA |
| GSM4626771_CACCAGGCAGGTCGTC-1  | GSM4626771 | OA |
| GSM4626771_CACCAGGCATGCTAGT-1  | GSM4626771 | OA |
| GSM4626771_CACCAGGGTGGCTCCA-1  | GSM4626771 | OA |
| GSM4626771_CACCAGGTCATATCGG-1  | GSM4626771 | OA |
| GSM4626771_CACCAGGTCGCCTGTT-1  | GSM4626771 | OA |
| GSM4626771_CACCAGGTCGTTGCCT-1  | GSM4626771 | OA |
| GSM4626771_CACCTTGAGCGAAGGG-1  | GSM4626771 | OA |
| GSM4626771_CACCTTGACGCGTCCA-1  | GSM4626771 | OA |
| GSM4626771_CACCTTGACGGCGATA-1  | GSM4626771 | OA |
| GSM4626771_CACCTTGCATGCCTTC-1  | GSM4626771 | OA |
| GSM4626771_CACCTTGGTAAACACA-1  | GSM4626771 | OA |
| GSM4626771_CACCTTGGTAGGAGTC-1  | GSM4626771 | OA |
| GSM4626771_CACCTTGGTCTCTTAT-1  | GSM4626771 | OA |
| GSM4626771_CACCTTGGTTAAGTAG-1  | GSM4626771 | OA |
| GSM4626771_CACCTTGGTTAGGGTG-1  | GSM4626771 | OA |
| GSM4626771_CACCTTGGTTGTTTGG-1  | GSM4626771 | OA |
| GSM4626771_CACTCCACAAGCCATT-1  | GSM4626771 | OA |
| GSM4626771_CACTCCACACTCAGGC-1  | GSM4626771 | OA |
| GSM4626771_CACTCCAGTACCCAAT-1  | GSM4626771 | OA |
| GSM4626771_CACTCCAGTATATGAG-1  | GSM4626771 | OA |
| GSM4626771_CACTCCAGTCAATGTC-1  | GSM4626771 | OA |
| GSM4626771_CACTCCAGTGAAAGAG-1  | GSM4626771 | OA |
| GSM4626771_CACTCCAGTTATGTGC-1  | GSM4626771 | OA |
| GSM4626771_CACTCCAGTTGAACTC-1  | GSM4626771 | OA |
| GSM4626771_CACTCCATCTTCTGGC-1  | GSM4626771 | OA |
| GSM4626771_CAGAATCAGACCTTTG-1  | GSM4626771 | OA |
| GSM4626771_CAGAATCAGATCCCAT-1  | GSM4626771 | OA |
| GSM4626771_CAGAATCAGCCAGAAC-1  | GSM4626771 | OA |
| GSM4626771_CAGAATCAGCGCCTCA-1  | GSM4626771 | OA |
| GSM4626771_CAGAATCAGCGTTCCG-1  | GSM4626771 | OA |
| GSM4626771_CAGAATCAGTCCGGTC-1  | GSM4626771 | OA |
| GSM4626771_CAGAATCCAATCCGAT-1  | GSM4626771 | OA |
| GSM4626771_CAGAATCCAGCCTGTG-1  | GSM4626771 | OA |
| GSM4626771_CAGAATCCATTACCTT-1  | GSM4626771 | OA |
| GSM4626771_CAGAATCGTAGGACAC-1  | GSM4626771 | OA |
| GSM4626771_CAGAATCGTCGCGTGT-1  | GSM4626771 | OA |
| GSM4626771_CAGAATCGTGCCTGGT-1  | GSM4626771 | OA |
| GSM4626771_CAGAATCTCCAAGCCG-1  | GSM4626771 | OA |
| GSM4626771_CAGAGAGAGAGACTAT-1  | GSM4626771 | OA |
| GSM4626771_CAGAGAGAGGGATGGG-1  | GSM4626771 | OA |
| GSM4626771_CAGAGAGAGTGCCATT-1  | GSM4626771 | OA |
| GSM4626771_CAGAGAGCAAGTTCTG-1  | GSM4626771 | OA |
| GSM4626771_CAGAGAGCACAAACGCC-1 | GSM4626771 | OA |
| GSM4626771_CAGAGAGCATAAGACA-1  | GSM4626771 | OA |
| GSM4626771_CAGAGAGGTAGGGACT-1  | GSM4626771 | OA |
| GSM4626771_CAGAGAGGTATTACCG-1  | GSM4626771 | OA |
| GSM4626771_CAGAGAGGTCCGAAGA-1  | GSM4626771 | OA |

|                               |            |    |
|-------------------------------|------------|----|
| GSM4626771_CAGAGAGGTGCAGGTA-1 | GSM4626771 | OA |
| GSM4626771_CAGAGAGTCACCCGAG-1 | GSM4626771 | OA |
| GSM4626771_CAGAGAGTCAGGCGAA-1 | GSM4626771 | OA |
| GSM4626771_CAGAGAGTCGAGAACG-1 | GSM4626771 | OA |
| GSM4626771_CAGAGAGTCTGCTTGC-1 | GSM4626771 | OA |
| GSM4626771_CAGATCAAGAAACCAT-1 | GSM4626771 | OA |
| GSM4626771_CAGATCAAGTACCGGA-1 | GSM4626771 | OA |
| GSM4626771_CAGATCAAGTATGACA-1 | GSM4626771 | OA |
| GSM4626771_CAGATCAAGTGCCAGA-1 | GSM4626771 | OA |
| GSM4626771_CAGATCAAGTTAAGTG-1 | GSM4626771 | OA |
| GSM4626771_CAGATCACAATAGCAA-1 | GSM4626771 | OA |
| GSM4626771_CAGATCAGTACGCTGC-1 | GSM4626771 | OA |
| GSM4626771_CAGATCAGTAGCAAAT-1 | GSM4626771 | OA |
| GSM4626771_CAGATCAGTAGCTGCC-1 | GSM4626771 | OA |
| GSM4626771_CAGATCAGTAGCTTGT-1 | GSM4626771 | OA |
| GSM4626771_CAGATCAGTATAGGTA-1 | GSM4626771 | OA |
| GSM4626771_CAGATCATCCTATTCA-1 | GSM4626771 | OA |
| GSM4626771_CAGCAGCAGCAGACTG-1 | GSM4626771 | OA |
| GSM4626771_CAGCAGCCAAAGAATC-1 | GSM4626771 | OA |
| GSM4626771_CAGCAGCCATCCCACT-1 | GSM4626771 | OA |
| GSM4626771_CAGCAGCGTATAGGGC-1 | GSM4626771 | OA |
| GSM4626771_CAGCAGCGTCCGAGTC-1 | GSM4626771 | OA |
| GSM4626771_CAGCAGCTCGGTGTCG-1 | GSM4626771 | OA |
| GSM4626771_CAGCAGCTCTCGATGA-1 | GSM4626771 | OA |
| GSM4626771_CAGCATAAGATACACA-1 | GSM4626771 | OA |
| GSM4626771_CAGCATAACTTAACG-1  | GSM4626771 | OA |
| GSM4626771_CAGCATAAGCTATTG-1  | GSM4626771 | OA |
| GSM4626771_CAGCATAGTAAGTAGT-1 | GSM4626771 | OA |
| GSM4626771_CAGCATAGTACAGTGG-1 | GSM4626771 | OA |
| GSM4626771_CAGCATAGTGATGTGG-1 | GSM4626771 | OA |
| GSM4626771_CAGCATAGTGCAGACA-1 | GSM4626771 | OA |
| GSM4626771_CAGCATAGTTAAAGTG-1 | GSM4626771 | OA |
| GSM4626771_CAGCATAGTTGACGTT-1 | GSM4626771 | OA |
| GSM4626771_CAGCATATCTGTCCGT-1 | GSM4626771 | OA |
| GSM4626771_CAGCCGAAGATCTGCT-1 | GSM4626771 | OA |
| GSM4626771_CAGCCGAAGTCGAGTG-1 | GSM4626771 | OA |
| GSM4626771_CAGCCGACAATGGTCT-1 | GSM4626771 | OA |
| GSM4626771_CAGCCGACAGGATTGG-1 | GSM4626771 | OA |
| GSM4626771_CAGCCGACAGTGGAGT-1 | GSM4626771 | OA |
| GSM4626771_CAGCCGACATTACGAC-1 | GSM4626771 | OA |
| GSM4626771_CAGCCGAGTGTGCCTG-1 | GSM4626771 | OA |
| GSM4626771_CAGCCGATCATGTCCC-1 | GSM4626771 | OA |
| GSM4626771_CAGCCGATCGGCATCG-1 | GSM4626771 | OA |
| GSM4626771_CAGCCGATCTGTCAAG-1 | GSM4626771 | OA |
| GSM4626771_CAGCCGATCTTACCGC-1 | GSM4626771 | OA |
| GSM4626771_CAGCGACCAAAGCGGT-1 | GSM4626771 | OA |
| GSM4626771_CAGCGACCAATGGAAT-1 | GSM4626771 | OA |
| GSM4626771_CAGCGACCACATCTTT-1 | GSM4626771 | OA |
| GSM4626771_CAGCGACCAGATGGGT-1 | GSM4626771 | OA |
| GSM4626771_CAGCGACCATATGGTC-1 | GSM4626771 | OA |
| GSM4626771_CAGCGACCATCACGAT-1 | GSM4626771 | OA |
| GSM4626771_CAGCGACGTAGATTAG-1 | GSM4626771 | OA |
| GSM4626771_CAGCGACGTGCGGTGT-1 | GSM4626771 | OA |
| GSM4626771_CAGCGACGTCTGCCAG-1 | GSM4626771 | OA |
| GSM4626771_CAGCGACGTCTGGAGA-1 | GSM4626771 | OA |
| GSM4626771_CAGCGACGTGAAGGCT-1 | GSM4626771 | OA |
| GSM4626771_CAGCGACGTTACGTCA-1 | GSM4626771 | OA |

|                                |            |    |
|--------------------------------|------------|----|
| GSM4626771_CAGCGACGTTTCGTGAT-1 | GSM4626771 | OA |
| GSM4626771_CAGCGACTCAACACTG-1  | GSM4626771 | OA |
| GSM4626771_CAGCGACTCAGTTAGC-1  | GSM4626771 | OA |
| GSM4626771_CAGCGACTCCCAACGG-1  | GSM4626771 | OA |
| GSM4626771_CAGCGACTCCTATTCA-1  | GSM4626771 | OA |
| GSM4626771_CAGCTAAAGAAAGTGG-1  | GSM4626771 | OA |
| GSM4626771_CAGCTAAAGACTTTTCG-1 | GSM4626771 | OA |
| GSM4626771_CAGCTAAAGCACAGGT-1  | GSM4626771 | OA |
| GSM4626771_CAGCTAAAGGTAGCCA-1  | GSM4626771 | OA |
| GSM4626771_CAGCTAAAGTCATCCA-1  | GSM4626771 | OA |
| GSM4626771_CAGCTAACAGACACTT-1  | GSM4626771 | OA |
| GSM4626771_CAGCTAAGTCCAGTTA-1  | GSM4626771 | OA |
| GSM4626771_CAGCTAAGTCCGAATT-1  | GSM4626771 | OA |
| GSM4626771_CAGCTAATCCCAAGTA-1  | GSM4626771 | OA |
| GSM4626771_CAGCTAATCTCACATT-1  | GSM4626771 | OA |
| GSM4626771_CAGCTAATCTCCTATA-1  | GSM4626771 | OA |
| GSM4626771_CAGCTGGAGCCCAACC-1  | GSM4626771 | OA |
| GSM4626771_CAGCTGGGTACCAGTT-1  | GSM4626771 | OA |
| GSM4626771_CAGCTGGGTGATGTGG-1  | GSM4626771 | OA |
| GSM4626771_CAGCTGGTCACTCTTA-1  | GSM4626771 | OA |
| GSM4626771_CAGCTGGTCGTAGGAG-1  | GSM4626771 | OA |
| GSM4626771_CAGGTGCAGTGAAGAG-1  | GSM4626771 | OA |
| GSM4626771_CAGGTGCCAATGCCAT-1  | GSM4626771 | OA |
| GSM4626771_CAGGTGCCACAGATTC-1  | GSM4626771 | OA |
| GSM4626771_CAGGTGCCACTAAGTC-1  | GSM4626771 | OA |
| GSM4626771_CAGGTGCCATCAGTCA-1  | GSM4626771 | OA |
| GSM4626771_CAGGTGCCATTGGTAC-1  | GSM4626771 | OA |
| GSM4626771_CAGGTGCGTTCCTCGAG-1 | GSM4626771 | OA |
| GSM4626771_CAGTAACAGTTAAGTG-1  | GSM4626771 | OA |
| GSM4626771_CAGTAACCACACATGT-1  | GSM4626771 | OA |
| GSM4626771_CAGTAACCACGTCAGC-1  | GSM4626771 | OA |
| GSM4626771_CAGTAACGTCTAAAGA-1  | GSM4626771 | OA |
| GSM4626771_CAGTAACGTGCGATAG-1  | GSM4626771 | OA |
| GSM4626771_CAGTAACGTGTGGCTC-1  | GSM4626771 | OA |
| GSM4626771_CAGTAACGTGTTAAGA-1  | GSM4626771 | OA |
| GSM4626771_CAGTAACGTTACGGAG-1  | GSM4626771 | OA |
| GSM4626771_CAGTAACGTTTACTCT-1  | GSM4626771 | OA |
| GSM4626771_CAGTAACTCAGGCAAG-1  | GSM4626771 | OA |
| GSM4626771_CAGTAACTCGAATCCA-1  | GSM4626771 | OA |
| GSM4626771_CAGTAACTCGGCCGAT-1  | GSM4626771 | OA |
| GSM4626771_CAGTCCTAGCTAACTC-1  | GSM4626771 | OA |
| GSM4626771_CAGTCCTAGTCTTGCA-1  | GSM4626771 | OA |
| GSM4626771_CAGTCCTCAATGCCAT-1  | GSM4626771 | OA |
| GSM4626771_CAGTCCTCACAGACTT-1  | GSM4626771 | OA |
| GSM4626771_CAGTCCTCACCCATC-1   | GSM4626771 | OA |
| GSM4626771_CAGTCCTCATGTAGTC-1  | GSM4626771 | OA |
| GSM4626771_CAGTCCTGTAGCACGA-1  | GSM4626771 | OA |
| GSM4626771_CAGTCCTGTGCGGGTT-1  | GSM4626771 | OA |
| GSM4626771_CAGTCCTGTTGCGCAC-1  | GSM4626771 | OA |
| GSM4626771_CAGTCCTTCCAAGTAC-1  | GSM4626771 | OA |
| GSM4626771_CAGTCCTTCGGTCTAA-1  | GSM4626771 | OA |
| GSM4626771_CATATGGAGACACTAA-1  | GSM4626771 | OA |
| GSM4626771_CATATGGAGCCAACAG-1  | GSM4626771 | OA |
| GSM4626771_CATATGGAGGCTAGAC-1  | GSM4626771 | OA |
| GSM4626771_CATATGGAGTTCCACA-1  | GSM4626771 | OA |
| GSM4626771_CATATGGCACAGATTC-1  | GSM4626771 | OA |
| GSM4626771_CATATGGCATCCGTGG-1  | GSM4626771 | OA |

|                                |            |    |
|--------------------------------|------------|----|
| GSM4626771_CATATGGGTAGCGATG-1  | GSM4626771 | OA |
| GSM4626771_CATATGGGTAGCGCAA-1  | GSM4626771 | OA |
| GSM4626771_CATATGGGTACCCAG-1   | GSM4626771 | OA |
| GSM4626771_CATATGGTCAACACGT-1  | GSM4626771 | OA |
| GSM4626771_CATATGGTCTGGGCCA-1  | GSM4626771 | OA |
| GSM4626771_CATATTCAGACTTTTCG-1 | GSM4626771 | OA |
| GSM4626771_CATATTCAGCTCCTTC-1  | GSM4626771 | OA |
| GSM4626771_CATATTCAGGACGAAA-1  | GSM4626771 | OA |
| GSM4626771_CATATTCGAATCGAAA-1  | GSM4626771 | OA |
| GSM4626771_CATATTCGAATCGGTT-1  | GSM4626771 | OA |
| GSM4626771_CATATTCAGACAGGT-1   | GSM4626771 | OA |
| GSM4626771_CATATTCGTATAAACG-1  | GSM4626771 | OA |
| GSM4626771_CATATTCGTTTCCACC-1  | GSM4626771 | OA |
| GSM4626771_CATATTCCTCAATT-1    | GSM4626771 | OA |
| GSM4626771_CATATTCCTTGGTC-1    | GSM4626771 | OA |
| GSM4626771_CATATTCCTCGAATCCA-1 | GSM4626771 | OA |
| GSM4626771_CATATTCCTCGAAGCG-1  | GSM4626771 | OA |
| GSM4626771_CATATTCCTATCGCC-1   | GSM4626771 | OA |
| GSM4626771_CATATTCCTCCAACC-1   | GSM4626771 | OA |
| GSM4626771_CATATTCCTCGCTTG-1   | GSM4626771 | OA |
| GSM4626771_CATATTCCTGCCAGG-1   | GSM4626771 | OA |
| GSM4626771_CATCAAGAGAGGTAGA-1  | GSM4626771 | OA |
| GSM4626771_CATCAAGAGAGTGAGA-1  | GSM4626771 | OA |
| GSM4626771_CATCAAGAGCGATCCC-1  | GSM4626771 | OA |
| GSM4626771_CATCAAGAGCTGAACG-1  | GSM4626771 | OA |
| GSM4626771_CATCAAGCACGAAGCA-1  | GSM4626771 | OA |
| GSM4626771_CATCAAGCAGGCGATA-1  | GSM4626771 | OA |
| GSM4626771_CATCAAGCAGTTCATG-1  | GSM4626771 | OA |
| GSM4626771_CATCAAGTCAGCGACC-1  | GSM4626771 | OA |
| GSM4626771_CATCAAGTCAGGCGAA-1  | GSM4626771 | OA |
| GSM4626771_CATCAAGTCATTCACT-1  | GSM4626771 | OA |
| GSM4626771_CATCAAGTCGTACCGG-1  | GSM4626771 | OA |
| GSM4626771_CATCAAGTCTTTAGGG-1  | GSM4626771 | OA |
| GSM4626771_CATCAGAAGAGGGATA-1  | GSM4626771 | OA |
| GSM4626771_CATCAGAAGATCGGGT-1  | GSM4626771 | OA |
| GSM4626771_CATCAGAAGTTACGGG-1  | GSM4626771 | OA |
| GSM4626771_CATCAGAGTAAAGTCA-1  | GSM4626771 | OA |
| GSM4626771_CATCAGAGTACTTGAC-1  | GSM4626771 | OA |
| GSM4626771_CATCAGAGTAGCTAAA-1  | GSM4626771 | OA |
| GSM4626771_CATCAGAGTGTGACGA-1  | GSM4626771 | OA |
| GSM4626771_CATCAGATCATGTAGC-1  | GSM4626771 | OA |
| GSM4626771_CATCAGATCCATGAGT-1  | GSM4626771 | OA |
| GSM4626771_CATCAGATCCGTTGCT-1  | GSM4626771 | OA |
| GSM4626771_CATCAGATCGGAAATA-1  | GSM4626771 | OA |
| GSM4626771_CATCAGATCGTTTGCC-1  | GSM4626771 | OA |
| GSM4626771_CATCCACAGACAAGCC-1  | GSM4626771 | OA |
| GSM4626771_CATCCACAGCACGCCT-1  | GSM4626771 | OA |
| GSM4626771_CATCCACAGGGCTCTC-1  | GSM4626771 | OA |
| GSM4626771_CATCCACCAGGGCATA-1  | GSM4626771 | OA |
| GSM4626771_CATCCACCAGTACACT-1  | GSM4626771 | OA |
| GSM4626771_CATCCACGTGAGGCTA-1  | GSM4626771 | OA |
| GSM4626771_CATCCACTCATAAAGG-1  | GSM4626771 | OA |
| GSM4626771_CATCCACTCATCATT-1   | GSM4626771 | OA |
| GSM4626771_CATCCACTCCACGCAG-1  | GSM4626771 | OA |
| GSM4626771_CATCCACTCGAATGCT-1  | GSM4626771 | OA |
| GSM4626771_CATCCACTCGAGAACG-1  | GSM4626771 | OA |
| GSM4626771_CATCCACTCGTGGTCG-1  | GSM4626771 | OA |



|                                |            |    |
|--------------------------------|------------|----|
| GSM4626771_CATCCACTCGTTACGA-1  | GSM4626771 | OA |
| GSM4626771_CATCCACTCTCTTGAT-1  | GSM4626771 | OA |
| GSM4626771_CATCGAAAGATGTCGG-1  | GSM4626771 | OA |
| GSM4626771_CATCGAACATCTACGA-1  | GSM4626771 | OA |
| GSM4626771_CATCGAATCGTATCAG-1  | GSM4626771 | OA |
| GSM4626771_CATCGAATCTGCTGCT-1  | GSM4626771 | OA |
| GSM4626771_CATCGAATCTGGTATG-1  | GSM4626771 | OA |
| GSM4626771_CATCGGGAGAAACGAG-1  | GSM4626771 | OA |
| GSM4626771_CATCGGGAGAAAGGTGA-1 | GSM4626771 | OA |
| GSM4626771_CATCGGGAGATTACCC-1  | GSM4626771 | OA |
| GSM4626771_CATCGGGCAAGTAATG-1  | GSM4626771 | OA |
| GSM4626771_CATCGGGGTAGATTAG-1  | GSM4626771 | OA |
| GSM4626771_CATCGGGTCGAGGTAG-1  | GSM4626771 | OA |
| GSM4626771_CATCGGGTCGGCTTGG-1  | GSM4626771 | OA |
| GSM4626771_CATCGGGTCTGCGACG-1  | GSM4626771 | OA |
| GSM4626771_CATCGGGTCTGGCGTG-1  | GSM4626771 | OA |
| GSM4626771_CATGACAAGCTAAACA-1  | GSM4626771 | OA |
| GSM4626771_CATGACAAGGTAGCTG-1  | GSM4626771 | OA |
| GSM4626771_CATGACACACATGACT-1  | GSM4626771 | OA |
| GSM4626771_CATGACACATGTAAGA-1  | GSM4626771 | OA |
| GSM4626771_CATGACAGTACTTGAC-1  | GSM4626771 | OA |
| GSM4626771_CATGACAGTCCCTACT-1  | GSM4626771 | OA |
| GSM4626771_CATGACAGTCTCAACA-1  | GSM4626771 | OA |
| GSM4626771_CATGACATCACTTCAT-1  | GSM4626771 | OA |
| GSM4626771_CATGACATCCCTGACT-1  | GSM4626771 | OA |
| GSM4626771_CATGACATCTAACTCT-1  | GSM4626771 | OA |
| GSM4626771_CATGCCTAGAGACTAT-1  | GSM4626771 | OA |
| GSM4626771_CATGCCTAGTCCATAC-1  | GSM4626771 | OA |
| GSM4626771_CATGCCTCAATCGGTT-1  | GSM4626771 | OA |
| GSM4626771_CATGCCTCAGGAATGC-1  | GSM4626771 | OA |
| GSM4626771_CATGCCTCAGTTCATG-1  | GSM4626771 | OA |
| GSM4626771_CATGCCTGTACTTAGC-1  | GSM4626771 | OA |
| GSM4626771_CATGCCTGTATCTGCA-1  | GSM4626771 | OA |
| GSM4626771_CATGCCTGTTAAGTAG-1  | GSM4626771 | OA |
| GSM4626771_CATGCCTGTTGGACCC-1  | GSM4626771 | OA |
| GSM4626771_CATGCCTTCATGTGGT-1  | GSM4626771 | OA |
| GSM4626771_CATGCCTTCTAACGGT-1  | GSM4626771 | OA |
| GSM4626771_CATGGCGAGACAATAC-1  | GSM4626771 | OA |
| GSM4626771_CATGGCGAGCACACAG-1  | GSM4626771 | OA |
| GSM4626771_CATGGCGAGCCGATTT-1  | GSM4626771 | OA |
| GSM4626771_CATGGCGAGCTAACTC-1  | GSM4626771 | OA |
| GSM4626771_CATGGCGAGCTACCTA-1  | GSM4626771 | OA |
| GSM4626771_CATGGCGAGGCAGTCA-1  | GSM4626771 | OA |
| GSM4626771_CATGGCGAGGGAACGG-1  | GSM4626771 | OA |
| GSM4626771_CATGGCGAGGGCTTGA-1  | GSM4626771 | OA |
| GSM4626771_CATGGCGAGTACGCC-1   | GSM4626771 | OA |
| GSM4626771_CATGGCGCAGATGAGC-1  | GSM4626771 | OA |
| GSM4626771_CATGGCGCATCGGAAG-1  | GSM4626771 | OA |
| GSM4626771_CATGGCGGTACTCAAC-1  | GSM4626771 | OA |
| GSM4626771_CATGGCGGTCCAATA-1   | GSM4626771 | OA |
| GSM4626771_CATGGCGGTCTTGTCC-1  | GSM4626771 | OA |
| GSM4626771_CATGGCGGTGCTAGCC-1  | GSM4626771 | OA |
| GSM4626771_CATGGCGGTTACGGAG-1  | GSM4626771 | OA |
| GSM4626771_CATGGCGGTTGTGGAG-1  | GSM4626771 | OA |
| GSM4626771_CATGGCGGTTTTCGCTC-1 | GSM4626771 | OA |
| GSM4626771_CATGGCGTCATAACCG-1  | GSM4626771 | OA |
| GSM4626771_CATGGCGTCTTTACGT-1  | GSM4626771 | OA |

|                                 |            |    |
|---------------------------------|------------|----|
| GSM4626771_CATTATCAGAGTGACC-1   | GSM4626771 | OA |
| GSM4626771_CATTATCAGCGATTCT-1   | GSM4626771 | OA |
| GSM4626771_CATTATCAGGATGGAA-1   | GSM4626771 | OA |
| GSM4626771_CATTATCAGGCCCTTG-1   | GSM4626771 | OA |
| GSM4626771_CATTATCAGGCTACGA-1   | GSM4626771 | OA |
| GSM4626771_CATTATCCACGACTCG-1   | GSM4626771 | OA |
| GSM4626771_CATTATCCAGCTTAAC-1   | GSM4626771 | OA |
| GSM4626771_CATTATCCAGTTTACG-1   | GSM4626771 | OA |
| GSM4626771_CATTATCCATAGAAAC-1   | GSM4626771 | OA |
| GSM4626771_CATTATCCATCGATGT-1   | GSM4626771 | OA |
| GSM4626771_CATTATCGTCATATCG-1   | GSM4626771 | OA |
| GSM4626771_CATTATCGTGATGCC-1    | GSM4626771 | OA |
| GSM4626771_CATTATCGTTATGTGC-1   | GSM4626771 | OA |
| GSM4626771_CATTATCGTTGTACAC-1   | GSM4626771 | OA |
| GSM4626771_CATTATCGTTGTGCGG-1   | GSM4626771 | OA |
| GSM4626771_CATTATCTCACCCGAG-1   | GSM4626771 | OA |
| GSM4626771_CATTATCTCGTTACGA-1   | GSM4626771 | OA |
| GSM4626771_CATTATCTCTGCTTGC-1   | GSM4626771 | OA |
| GSM4626771_CATTTCGCAGCAGACTG-1  | GSM4626771 | OA |
| GSM4626771_CATTTCGCAGCTGTTCA-1  | GSM4626771 | OA |
| GSM4626771_CATTTCGCAGGCTAGAC-1  | GSM4626771 | OA |
| GSM4626771_CATTTCGCCAAGAAGAG-1  | GSM4626771 | OA |
| GSM4626771_CATTTCGCCACATTCTGA-1 | GSM4626771 | OA |
| GSM4626771_CATTTCGCCATTCTCAT-1  | GSM4626771 | OA |
| GSM4626771_CATTTCGCGTGTCTTT-1   | GSM4626771 | OA |
| GSM4626771_CATTTCGCGTTCGCGAC-1  | GSM4626771 | OA |
| GSM4626771_CATTTCGCGTTTTGGGCC-1 | GSM4626771 | OA |
| GSM4626771_CATTTCGCTCAGAGCTT-1  | GSM4626771 | OA |
| GSM4626771_CATTTCGCTCCTCATT-1   | GSM4626771 | OA |
| GSM4626771_CATTTCGCTCTAGCACA-1  | GSM4626771 | OA |
| GSM4626771_CCAATCCAGACTAGGC-1   | GSM4626771 | OA |
| GSM4626771_CCAATCCAGCTCTCGG-1   | GSM4626771 | OA |
| GSM4626771_CCAATCCAGGAATCGC-1   | GSM4626771 | OA |
| GSM4626771_CCAATCCAGTCATGCT-1   | GSM4626771 | OA |
| GSM4626771_CCAATCCCCTACTCTT-1   | GSM4626771 | OA |
| GSM4626771_CCAATCCCAGGTCGTC-1   | GSM4626771 | OA |
| GSM4626771_CCAATCCGTCTCGTTC-1   | GSM4626771 | OA |
| GSM4626771_CCAATCCGTTGGTAAA-1   | GSM4626771 | OA |
| GSM4626771_CCAATCCTCCCTGACT-1   | GSM4626771 | OA |
| GSM4626771_CCAATCCTCCTTTTCGG-1  | GSM4626771 | OA |
| GSM4626771_CCAATCCTCGGAGCAA-1   | GSM4626771 | OA |
| GSM4626771_CCAATCCTCGTAGGAG-1   | GSM4626771 | OA |
| GSM4626771_CCACCTAAGAGACGAA-1   | GSM4626771 | OA |
| GSM4626771_CCACCTAAGTTATCGC-1   | GSM4626771 | OA |
| GSM4626771_CCACCTACAAGTAATG-1   | GSM4626771 | OA |
| GSM4626771_CCACCTACATGCTAGT-1   | GSM4626771 | OA |
| GSM4626771_CCACCTAGTAAGGATT-1   | GSM4626771 | OA |
| GSM4626771_CCACCTAGTCATATCG-1   | GSM4626771 | OA |
| GSM4626771_CCACCTAGTCTCTTTA-1   | GSM4626771 | OA |
| GSM4626771_CCACCTAGTTGTGCGG-1   | GSM4626771 | OA |
| GSM4626771_CCACCTAGTTTGACAC-1   | GSM4626771 | OA |
| GSM4626771_CCACCTATCAACCAAC-1   | GSM4626771 | OA |
| GSM4626771_CCACCTATCAGTCAGT-1   | GSM4626771 | OA |
| GSM4626771_CCACCTATCCTAAGTG-1   | GSM4626771 | OA |
| GSM4626771_CCACCTATCCTGCCAT-1   | GSM4626771 | OA |
| GSM4626771_CCACGGAAGTAGTGCG-1   | GSM4626771 | OA |
| GSM4626771_CCACGGACACCTGGTG-1   | GSM4626771 | OA |

|                                |            |    |
|--------------------------------|------------|----|
| GSM4626771_CCACGGAGTCATTAGC-1  | GSM4626771 | OA |
| GSM4626771_CCACGGAGTCCAGTAT-1  | GSM4626771 | OA |
| GSM4626771_CCACGGAGTGATGCC-1   | GSM4626771 | OA |
| GSM4626771_CCACGGATCGAGAGCA-1  | GSM4626771 | OA |
| GSM4626771_CCACGGATCGCAAGCC-1  | GSM4626771 | OA |
| GSM4626771_CCACGGATCTGCCAGG-1  | GSM4626771 | OA |
| GSM4626771_CCACGGATCTGTCTAT-1  | GSM4626771 | OA |
| GSM4626771_CCACTACAGGCGATAC-1  | GSM4626771 | OA |
| GSM4626771_CCACTACAGTGTCCCG-1  | GSM4626771 | OA |
| GSM4626771_CCACTACCAATCCAAC-1  | GSM4626771 | OA |
| GSM4626771_CCACTACCAATGTAAG-1  | GSM4626771 | OA |
| GSM4626771_CCACTACCAATTGCTG-1  | GSM4626771 | OA |
| GSM4626771_CCACTACCATGCATGT-1  | GSM4626771 | OA |
| GSM4626771_CCACTACGTAGGACAC-1  | GSM4626771 | OA |
| GSM4626771_CCACTACGTAGTAGTA-1  | GSM4626771 | OA |
| GSM4626771_CCACTACGTATTAGCC-1  | GSM4626771 | OA |
| GSM4626771_CCACTACTCATAGCAC-1  | GSM4626771 | OA |
| GSM4626771_CCAGCGAAGCAAATCA-1  | GSM4626771 | OA |
| GSM4626771_CCAGCGACAGCATGAG-1  | GSM4626771 | OA |
| GSM4626771_CCAGCGACATCAGTAC-1  | GSM4626771 | OA |
| GSM4626771_CCAGCGAGTCTGCGGT-1  | GSM4626771 | OA |
| GSM4626771_CCAGCGAGTTCGCGAC-1  | GSM4626771 | OA |
| GSM4626771_CCAGCGATCATCATT-1   | GSM4626771 | OA |
| GSM4626771_CCAGCGATCGCTGATA-1  | GSM4626771 | OA |
| GSM4626771_CCAGCGATCTCGCTTG-1  | GSM4626771 | OA |
| GSM4626771_CCATGTCAGTAGGTGC-1  | GSM4626771 | OA |
| GSM4626771_CCATGTCCAAGTGGCC-1  | GSM4626771 | OA |
| GSM4626771_CCATGTCCAGTAGAGC-1  | GSM4626771 | OA |
| GSM4626771_CCATGTTCGTCATACC-1  | GSM4626771 | OA |
| GSM4626771_CCATGTTCGTCTCTCGT-1 | GSM4626771 | OA |
| GSM4626771_CCATGTTCGTGGGTATG-1 | GSM4626771 | OA |
| GSM4626771_CCATGTCTTTGGGCC-1   | GSM4626771 | OA |
| GSM4626771_CCATGTCTCATACGGT-1  | GSM4626771 | OA |
| GSM4626771_CCATGTCTCGCAGGCT-1  | GSM4626771 | OA |
| GSM4626771_CCATGTCTCGTGACAT-1  | GSM4626771 | OA |
| GSM4626771_CCATGTCTCGTGGACC-1  | GSM4626771 | OA |
| GSM4626771_CCATGTCTCGTTTAGG-1  | GSM4626771 | OA |
| GSM4626771_CCATTCGAGGATGCGT-1  | GSM4626771 | OA |
| GSM4626771_CCATTCGAGTGAACGC-1  | GSM4626771 | OA |
| GSM4626771_CCATTCGCAAAGAATC-1  | GSM4626771 | OA |
| GSM4626771_CCATTCGCAAAGCGCT-1  | GSM4626771 | OA |
| GSM4626771_CCATTCGCAAGCGCTC-1  | GSM4626771 | OA |
| GSM4626771_CCATTCGCAGCTTAAC-1  | GSM4626771 | OA |
| GSM4626771_CCATTCGCAGTGGGAT-1  | GSM4626771 | OA |
| GSM4626771_CCATTCGCATGAAGTA-1  | GSM4626771 | OA |
| GSM4626771_CCATTCGGTGAGCGAT-1  | GSM4626771 | OA |
| GSM4626771_CCATTCGGTTGCGTTA-1  | GSM4626771 | OA |
| GSM4626771_CCATTCGTCAAACCAC-1  | GSM4626771 | OA |
| GSM4626771_CCATTCGTCCGATGGA-1  | GSM4626771 | OA |
| GSM4626771_CCCAATCAGACACTAA-1  | GSM4626771 | OA |
| GSM4626771_CCCAATCAGAGTACAT-1  | GSM4626771 | OA |
| GSM4626771_CCCAATCAGGTGGGTT-1  | GSM4626771 | OA |
| GSM4626771_CCCAATCCAAATCCGT-1  | GSM4626771 | OA |
| GSM4626771_CCCAATCCAAGACTG-1   | GSM4626771 | OA |
| GSM4626771_CCCAATCGTACTTAGC-1  | GSM4626771 | OA |
| GSM4626771_CCCAATCGTGTCTCT-1   | GSM4626771 | OA |
| GSM4626771_CCCAATCTCAAACCAC-1  | GSM4626771 | OA |

|                                |            |    |
|--------------------------------|------------|----|
| GSM4626771_CCCAATCTCCGGGTGT-1  | GSM4626771 | OA |
| GSM4626771_CCCAATCTCGTTTGCC-1  | GSM4626771 | OA |
| GSM4626771_CCCAATCTCTTAACCT-1  | GSM4626771 | OA |
| GSM4626771_CCCAGTTAGGCCCTCA-1  | GSM4626771 | OA |
| GSM4626771_CCCAGTTAGTCCTCCT-1  | GSM4626771 | OA |
| GSM4626771_CCCAGTTGTAGGGACT-1  | GSM4626771 | OA |
| GSM4626771_CCCAGTTGTCTAAAGA-1  | GSM4626771 | OA |
| GSM4626771_CCCAGTTTCAAAGACA-1  | GSM4626771 | OA |
| GSM4626771_CCCAGTTTACAATGC-1   | GSM4626771 | OA |
| GSM4626771_CCCAGTTTCAGATAAG-1  | GSM4626771 | OA |
| GSM4626771_CCCAGTTTCAGGATCT-1  | GSM4626771 | OA |
| GSM4626771_CCCAGTTTCCGAATGT-1  | GSM4626771 | OA |
| GSM4626771_CCCAGTTTCTATTCA-1   | GSM4626771 | OA |
| GSM4626771_CCCAGTTTCTCTAGC-1   | GSM4626771 | OA |
| GSM4626771_CCCAGTTTCGTGGACC-1  | GSM4626771 | OA |
| GSM4626771_CCCATACAGCCCAACC-1  | GSM4626771 | OA |
| GSM4626771_CCCATACAGGCAGGTT-1  | GSM4626771 | OA |
| GSM4626771_CCCATACAGTGGTAGC-1  | GSM4626771 | OA |
| GSM4626771_CCCATACAGTTACGGG-1  | GSM4626771 | OA |
| GSM4626771_CCCATACCACCAGTTA-1  | GSM4626771 | OA |
| GSM4626771_CCCATACCATTAACCG-1  | GSM4626771 | OA |
| GSM4626771_CCCATACGTAAACCTC-1  | GSM4626771 | OA |
| GSM4626771_CCCATACGTATCTGCA-1  | GSM4626771 | OA |
| GSM4626771_CCCATACTCCACGACG-1  | GSM4626771 | OA |
| GSM4626771_CCCATACTCTCCCTGA-1  | GSM4626771 | OA |
| GSM4626771_CCCTCCTAGCGTGAAC-1  | GSM4626771 | OA |
| GSM4626771_CCCTCCTAGCTGAAAT-1  | GSM4626771 | OA |
| GSM4626771_CCCTCCTCAAAGGCGT-1  | GSM4626771 | OA |
| GSM4626771_CCCTCCTCAAGCTGGA-1  | GSM4626771 | OA |
| GSM4626771_CCCTCCTCATTACCTT-1  | GSM4626771 | OA |
| GSM4626771_CCCTCCTGTGACCAAG-1  | GSM4626771 | OA |
| GSM4626771_CCCTCCTTCTGTCAAG-1  | GSM4626771 | OA |
| GSM4626771_CCGGGATAGGCTCTTA-1  | GSM4626771 | OA |
| GSM4626771_CCGGGATCAAGTCTGT-1  | GSM4626771 | OA |
| GSM4626771_CCGGGATGTACCGCTG-1  | GSM4626771 | OA |
| GSM4626771_CCGGGATGTATTCTCT-1  | GSM4626771 | OA |
| GSM4626771_CCGGGATGTCATCCCT-1  | GSM4626771 | OA |
| GSM4626771_CCGGGATGTCATGCCG-1  | GSM4626771 | OA |
| GSM4626771_CCGGGATGTCCGTCAG-1  | GSM4626771 | OA |
| GSM4626771_CCGGGATTACAGCTTAG-1 | GSM4626771 | OA |
| GSM4626771_CCGGGATTCCAAGAT-1   | GSM4626771 | OA |
| GSM4626771_CCGGGATTCCGTACAA-1  | GSM4626771 | OA |
| GSM4626771_CCGGGATTCCGTGTCG-1  | GSM4626771 | OA |
| GSM4626771_CCGGTAGAGATCTGCT-1  | GSM4626771 | OA |
| GSM4626771_CCGGTAGAGGCATGTG-1  | GSM4626771 | OA |
| GSM4626771_CCGGTAGCAAACGTGG-1  | GSM4626771 | OA |
| GSM4626771_CCGGTAGGTGCTAGCC-1  | GSM4626771 | OA |
| GSM4626771_CCGGTAGGTTCAGGCC-1  | GSM4626771 | OA |
| GSM4626771_CCGGTAGGTTCCATGA-1  | GSM4626771 | OA |
| GSM4626771_CCGGTAGTCTGCGGCA-1  | GSM4626771 | OA |
| GSM4626771_CCGGTAGTCTTGCCGT-1  | GSM4626771 | OA |
| GSM4626771_CCGTACTAGAATGTTG-1  | GSM4626771 | OA |
| GSM4626771_CCGTACTAGCACGCCT-1  | GSM4626771 | OA |
| GSM4626771_CCGTACTAGTGGAGTC-1  | GSM4626771 | OA |
| GSM4626771_CCGTACTCAGCGTTCG-1  | GSM4626771 | OA |
| GSM4626771_CCGTACTCATCGACGC-1  | GSM4626771 | OA |
| GSM4626771_CCGTACTGTATGAAAC-1  | GSM4626771 | OA |

|                                |            |    |
|--------------------------------|------------|----|
| GSM4626771_CCGTACTGTCTAGCGC-1  | GSM4626771 | OA |
| GSM4626771_CCGTACTGTCTTGATG-1  | GSM4626771 | OA |
| GSM4626771_CCGTACTGTTGATTGC-1  | GSM4626771 | OA |
| GSM4626771_CCGTACTGTTGGAGGT-1  | GSM4626771 | OA |
| GSM4626771_CCGTACTTCACGCATA-1  | GSM4626771 | OA |
| GSM4626771_CCGTACTTCGCAAAC-1   | GSM4626771 | OA |
| GSM4626771_CCGTACTTCGGCGCTA-1  | GSM4626771 | OA |
| GSM4626771_CCGTACTTCTCTAGGA-1  | GSM4626771 | OA |
| GSM4626771_CCGTGGAAGCCAGTTT-1  | GSM4626771 | OA |
| GSM4626771_CCGTGGAAGGATCGCA-1  | GSM4626771 | OA |
| GSM4626771_CCGTGGAAGGGCATGT-1  | GSM4626771 | OA |
| GSM4626771_CCGTGGAACAAAGTCAA-1 | GSM4626771 | OA |
| GSM4626771_CCGTGGAACAATCTGCA-1 | GSM4626771 | OA |
| GSM4626771_CCGTGGAAGTTACTGAC-1 | GSM4626771 | OA |
| GSM4626771_CCGTGGAAGTTCCGGCA-1 | GSM4626771 | OA |
| GSM4626771_CCGTGGAAGTTTGTTC-1  | GSM4626771 | OA |
| GSM4626771_CCGTGGAATCACTTATC-1 | GSM4626771 | OA |
| GSM4626771_CCGTGGAATCTTTCCTC-1 | GSM4626771 | OA |
| GSM4626771_CCGTTCAAGTGCAAGC-1  | GSM4626771 | OA |
| GSM4626771_CCGTTCAAGTTAACGA-1  | GSM4626771 | OA |
| GSM4626771_CCGTTCACACCGTTGG-1  | GSM4626771 | OA |
| GSM4626771_CCGTTCACATTCCTCG-1  | GSM4626771 | OA |
| GSM4626771_CCGTTCACATTGTGCA-1  | GSM4626771 | OA |
| GSM4626771_CCGTTCAGTACCGTTA-1  | GSM4626771 | OA |
| GSM4626771_CCGTTCAGTGACGGTA-1  | GSM4626771 | OA |
| GSM4626771_CCGTTCAGTGATAAAC-1  | GSM4626771 | OA |
| GSM4626771_CCGTTCAGTTTAGCTG-1  | GSM4626771 | OA |
| GSM4626771_CCTAAAGAGAGGGCTT-1  | GSM4626771 | OA |
| GSM4626771_CCTAAAGAGTGAATTG-1  | GSM4626771 | OA |
| GSM4626771_CCTAAAGCAGCTATTG-1  | GSM4626771 | OA |
| GSM4626771_CCTAAAGGTAATTGGA-1  | GSM4626771 | OA |
| GSM4626771_CCTAAAGGTATTCTCT-1  | GSM4626771 | OA |
| GSM4626771_CCTAAAGGTTCGTGGCT-1 | GSM4626771 | OA |
| GSM4626771_CCTACACAGACAAAGG-1  | GSM4626771 | OA |
| GSM4626771_CCTACACAGATTACCC-1  | GSM4626771 | OA |
| GSM4626771_CCTACACAGGCATGTG-1  | GSM4626771 | OA |
| GSM4626771_CCTACACAGTGGGTTG-1  | GSM4626771 | OA |
| GSM4626771_CCTACACCAATTGCTG-1  | GSM4626771 | OA |
| GSM4626771_CCTACACCATTGGTAC-1  | GSM4626771 | OA |
| GSM4626771_CCTACACGTCCAAGTT-1  | GSM4626771 | OA |
| GSM4626771_CCTACACGTTCGCGAAA-1 | GSM4626771 | OA |
| GSM4626771_CCTACACTCAACGGCC-1  | GSM4626771 | OA |
| GSM4626771_CCTACACTCACTTATC-1  | GSM4626771 | OA |
| GSM4626771_CCTACACTCGTCTGCT-1  | GSM4626771 | OA |
| GSM4626771_CCTACACTCTACTTAC-1  | GSM4626771 | OA |
| GSM4626771_CCTACACTCTTGACT-1   | GSM4626771 | OA |
| GSM4626771_CCTACCAAGAGACGAA-1  | GSM4626771 | OA |
| GSM4626771_CCTACCAAGAGCTTCT-1  | GSM4626771 | OA |
| GSM4626771_CCTACCAAGCAGGCTA-1  | GSM4626771 | OA |
| GSM4626771_CCTACCAAGGACTGGT-1  | GSM4626771 | OA |
| GSM4626771_CCTACCAAGTTGTAGA-1  | GSM4626771 | OA |
| GSM4626771_CCTACCACAAACAACA-1  | GSM4626771 | OA |
| GSM4626771_CCTACCACAAGGCTCC-1  | GSM4626771 | OA |
| GSM4626771_CCTACCACAGACGCAA-1  | GSM4626771 | OA |
| GSM4626771_CCTACCAGTATAGTAG-1  | GSM4626771 | OA |
| GSM4626771_CCTACCAGTCAACATC-1  | GSM4626771 | OA |
| GSM4626771_CCTACCAGTGTGTGCC-1  | GSM4626771 | OA |

|                                |            |    |
|--------------------------------|------------|----|
| GSM4626771_CCTACCATCACCTCGT-1  | GSM4626771 | OA |
| GSM4626771_CCTAGCTAGAAACCAT-1  | GSM4626771 | OA |
| GSM4626771_CCTAGCTAGAGTACCG-1  | GSM4626771 | OA |
| GSM4626771_CCTAGCTAGTACCGGA-1  | GSM4626771 | OA |
| GSM4626771_CCTAGCTCAATCCGAT-1  | GSM4626771 | OA |
| GSM4626771_CCTAGCTCACTCAGGC-1  | GSM4626771 | OA |
| GSM4626771_CCTAGCTCATATACCG-1  | GSM4626771 | OA |
| GSM4626771_CCTAGCTTCCGGCACA-1  | GSM4626771 | OA |
| GSM4626771_CCTAGCTTCCCTGCTTG-1 | GSM4626771 | OA |
| GSM4626771_CCTAGCTTCGCCAAAT-1  | GSM4626771 | OA |
| GSM4626771_CCTAGCTTCTATCCTA-1  | GSM4626771 | OA |
| GSM4626771_CCTATTAAGGGCACTA-1  | GSM4626771 | OA |
| GSM4626771_CCTATTAAGTACACCT-1  | GSM4626771 | OA |
| GSM4626771_CCTATTAAGTACATGA-1  | GSM4626771 | OA |
| GSM4626771_CCTATTAAGTGGAGAA-1  | GSM4626771 | OA |
| GSM4626771_CCTATTAAGTTTAGGA-1  | GSM4626771 | OA |
| GSM4626771_CCTATTACAATACGCT-1  | GSM4626771 | OA |
| GSM4626771_CCTATTATCCAGAGGA-1  | GSM4626771 | OA |
| GSM4626771_CCTATTATCCCATTAT-1  | GSM4626771 | OA |
| GSM4626771_CCTATTATCCGAGCCA-1  | GSM4626771 | OA |
| GSM4626771_CCTATTATCTGCCCTA-1  | GSM4626771 | OA |
| GSM4626771_CCTCAGTCAAGTTGTC-1  | GSM4626771 | OA |
| GSM4626771_CCTCAGTCAGTCAGAG-1  | GSM4626771 | OA |
| GSM4626771_CCTCAGTCATGCCTTC-1  | GSM4626771 | OA |
| GSM4626771_CCTCAGTCATGTAAGA-1  | GSM4626771 | OA |
| GSM4626771_CCTCAGTGTACTCGCG-1  | GSM4626771 | OA |
| GSM4626771_CCTCAGTGTATATGGA-1  | GSM4626771 | OA |
| GSM4626771_CCTCAGTGTGCCTGTG-1  | GSM4626771 | OA |
| GSM4626771_CCTCAGTGTTGCTAA-1   | GSM4626771 | OA |
| GSM4626771_CCTCAGTGTTCTGAAC-1  | GSM4626771 | OA |
| GSM4626771_CCTCAGTTCAGGTTCA-1  | GSM4626771 | OA |
| GSM4626771_CCTCAGTTCCAAACAC-1  | GSM4626771 | OA |
| GSM4626771_CCTCAGTTCCAAGTAC-1  | GSM4626771 | OA |
| GSM4626771_CCTCAGTTCATCCCG-1   | GSM4626771 | OA |
| GSM4626771_CCTCAGTTCCTCCTTC-1  | GSM4626771 | OA |
| GSM4626771_CCTCTGAAGATGTTAG-1  | GSM4626771 | OA |
| GSM4626771_CCTCTGAAGTGTTTGC-1  | GSM4626771 | OA |
| GSM4626771_CCTCTGACAAAGTCAA-1  | GSM4626771 | OA |
| GSM4626771_CCTCTGACAAGAAGAG-1  | GSM4626771 | OA |
| GSM4626771_CCTCTGATCATCGCTC-1  | GSM4626771 | OA |
| GSM4626771_CCTCTGATCGAGGTAG-1  | GSM4626771 | OA |
| GSM4626771_CCTTACGAGAGACTAT-1  | GSM4626771 | OA |
| GSM4626771_CCTTACGAGGATGGAA-1  | GSM4626771 | OA |
| GSM4626771_CCTTACGCAATGCCAT-1  | GSM4626771 | OA |
| GSM4626771_CCTTACGCATAGACTC-1  | GSM4626771 | OA |
| GSM4626771_CCTTACGGTAAATGTG-1  | GSM4626771 | OA |
| GSM4626771_CCTTACGGTCGCATAT-1  | GSM4626771 | OA |
| GSM4626771_CCTTACGGTGTTTCA-1   | GSM4626771 | OA |
| GSM4626771_CCTTACGGTGTTTGTG-1  | GSM4626771 | OA |
| GSM4626771_CCTTACGTCCAATGGT-1  | GSM4626771 | OA |
| GSM4626771_CCTTACGTCGGCTTGG-1  | GSM4626771 | OA |
| GSM4626771_CCTTCCCAGACCCACC-1  | GSM4626771 | OA |
| GSM4626771_CCTTCCCAGATATGCA-1  | GSM4626771 | OA |
| GSM4626771_CCTTCCCAGATATGGT-1  | GSM4626771 | OA |
| GSM4626771_CCTTCCCAGGCTCATT-1  | GSM4626771 | OA |
| GSM4626771_CCTTCCCCAAAGGTGC-1  | GSM4626771 | OA |
| GSM4626771_CCTTCCCCAGATAATG-1  | GSM4626771 | OA |

|                                |            |    |
|--------------------------------|------------|----|
| GSM4626771_CCTTCCCAGGTCGTC-1   | GSM4626771 | OA |
| GSM4626771_CCTTCCCGTAGCGATG-1  | GSM4626771 | OA |
| GSM4626771_CCTTCCCGTCTCACCT-1  | GSM4626771 | OA |
| GSM4626771_CCTTCCCGTTCCGGCAC-1 | GSM4626771 | OA |
| GSM4626771_CCTTCCCGTTGTGGCC-1  | GSM4626771 | OA |
| GSM4626771_CCTTCCCTCGTCTGAA-1  | GSM4626771 | OA |
| GSM4626771_CCTTCCCTCTCCGGTT-1  | GSM4626771 | OA |
| GSM4626771_CCTTCGACAAGTTGTC-1  | GSM4626771 | OA |
| GSM4626771_CCTTCGACACGTGAGA-1  | GSM4626771 | OA |
| GSM4626771_CCTTCGACACTTACGA-1  | GSM4626771 | OA |
| GSM4626771_CCTTCGACATACTCTT-1  | GSM4626771 | OA |
| GSM4626771_CCTTCGAGTAAGGATT-1  | GSM4626771 | OA |
| GSM4626771_CCTTCGAGTACTTCTT-1  | GSM4626771 | OA |
| GSM4626771_CCTTCGAGTCTTCTCG-1  | GSM4626771 | OA |
| GSM4626771_CCTTCGAGTGCACCTTA-1 | GSM4626771 | OA |
| GSM4626771_CCTTCGAGTTCGGGCT-1  | GSM4626771 | OA |
| GSM4626771_CCTTCGATCAGTTCGA-1  | GSM4626771 | OA |
| GSM4626771_CCTTCGATCCAGAAGG-1  | GSM4626771 | OA |
| GSM4626771_CCTTCGATCTAGCACA-1  | GSM4626771 | OA |
| GSM4626771_CCTTCGATCTCTTATG-1  | GSM4626771 | OA |
| GSM4626771_CCTTTCTAGTCCGTAT-1  | GSM4626771 | OA |
| GSM4626771_CCTTTCTAGTGCAAGC-1  | GSM4626771 | OA |
| GSM4626771_CCTTTCTCATGGTTGT-1  | GSM4626771 | OA |
| GSM4626771_CCTTTCTCATTTCGACA-1 | GSM4626771 | OA |
| GSM4626771_CCTTTCTCATTTCGCC-1  | GSM4626771 | OA |
| GSM4626771_CCTTTCTGTGCCTGTG-1  | GSM4626771 | OA |
| GSM4626771_CCTTTCTTCGCAGGCT-1  | GSM4626771 | OA |
| GSM4626771_CGAACATAGATGTAAC-1  | GSM4626771 | OA |
| GSM4626771_CGAACATAGCCAGTTT-1  | GSM4626771 | OA |
| GSM4626771_CGAACATAGGTGCTAG-1  | GSM4626771 | OA |
| GSM4626771_CGAACATCAAGCCTAT-1  | GSM4626771 | OA |
| GSM4626771_CGAACATCAAGGCTCC-1  | GSM4626771 | OA |
| GSM4626771_CGAACATCACGAAACG-1  | GSM4626771 | OA |
| GSM4626771_CGAACATCACGCCAGT-1  | GSM4626771 | OA |
| GSM4626771_CGAACATCAGAAGCAC-1  | GSM4626771 | OA |
| GSM4626771_CGAACATCAGGACCCT-1  | GSM4626771 | OA |
| GSM4626771_CGAACATGTTGATTGC-1  | GSM4626771 | OA |
| GSM4626771_CGAACATGTTTGGCGC-1  | GSM4626771 | OA |
| GSM4626771_CGAACATTTCATGCAAC-1 | GSM4626771 | OA |
| GSM4626771_CGAATGTAGGCAGTCA-1  | GSM4626771 | OA |
| GSM4626771_CGAATGTTCATTCTCG-1  | GSM4626771 | OA |
| GSM4626771_CGAATGTGTTATGTGC-1  | GSM4626771 | OA |
| GSM4626771_CGAATGTGTTCCGGCA-1  | GSM4626771 | OA |
| GSM4626771_CGAATGTGTTCTCATT-1  | GSM4626771 | OA |
| GSM4626771_CGAATGTTCAAGGTAA-1  | GSM4626771 | OA |
| GSM4626771_CGAATGTTCCACTGGG-1  | GSM4626771 | OA |
| GSM4626771_CGAATGTTTCGTAGGAG-1 | GSM4626771 | OA |
| GSM4626771_CGAATGTTCTGCAGTA-1  | GSM4626771 | OA |
| GSM4626771_CGACCTTAGGACAGCT-1  | GSM4626771 | OA |
| GSM4626771_CGACCTTACGTCTCT-1   | GSM4626771 | OA |
| GSM4626771_CGACCTTCAGTTTACG-1  | GSM4626771 | OA |
| GSM4626771_CGACCTTGTAGCGTGA-1  | GSM4626771 | OA |
| GSM4626771_CGACCTTGTGCTTCT-1   | GSM4626771 | OA |
| GSM4626771_CGACCTTGTGCGCTTG-1  | GSM4626771 | OA |
| GSM4626771_CGACCTTTCCTGCTTG-1  | GSM4626771 | OA |
| GSM4626771_CGACTTCAGACACTAA-1  | GSM4626771 | OA |
| GSM4626771_CGACTTCAGATGTTAG-1  | GSM4626771 | OA |

|                                |            |    |
|--------------------------------|------------|----|
| GSM4626771_CGACTTCAGGAACTGC-1  | GSM4626771 | OA |
| GSM4626771_CGACTTCAGGCACATG-1  | GSM4626771 | OA |
| GSM4626771_CGACTTCGTAATCACC-1  | GSM4626771 | OA |
| GSM4626771_CGACTTCGTAGGACAC-1  | GSM4626771 | OA |
| GSM4626771_CGACTTCTCAAGAAAGT-1 | GSM4626771 | OA |
| GSM4626771_CGACTTCTCACTATTC-1  | GSM4626771 | OA |
| GSM4626771_CGACTTCTCAGAAATG-1  | GSM4626771 | OA |
| GSM4626771_CGACTTCTCCGTCAA-1   | GSM4626771 | OA |
| GSM4626771_CGAGAAGCAGACTCGC-1  | GSM4626771 | OA |
| GSM4626771_CGAGAAGCATGAAGTA-1  | GSM4626771 | OA |
| GSM4626771_CGAGAAGGTTCAACT-1   | GSM4626771 | OA |
| GSM4626771_CGAGAAGTCCAGTAGT-1  | GSM4626771 | OA |
| GSM4626771_CGAGAAGTCGTTGCCT-1  | GSM4626771 | OA |
| GSM4626771_CGAGCACAGAGAGCTC-1  | GSM4626771 | OA |
| GSM4626771_CGAGCACAGCACGCCT-1  | GSM4626771 | OA |
| GSM4626771_CGAGCACAGGTGGGTT-1  | GSM4626771 | OA |
| GSM4626771_CGAGCACCAAGTTGTC-1  | GSM4626771 | OA |
| GSM4626771_CGAGCACACGACGAA-1   | GSM4626771 | OA |
| GSM4626771_CGAGCACACGACGTA-1   | GSM4626771 | OA |
| GSM4626771_CGAGCACGTAAACGCG-1  | GSM4626771 | OA |
| GSM4626771_CGAGCACGTCATCCCT-1  | GSM4626771 | OA |
| GSM4626771_CGAGCACGTCGTTCT-1   | GSM4626771 | OA |
| GSM4626771_CGAGCACTCTGTTTGT-1  | GSM4626771 | OA |
| GSM4626771_CGAGCCAAGATATACG-1  | GSM4626771 | OA |
| GSM4626771_CGAGCCAAGATGTCGG-1  | GSM4626771 | OA |
| GSM4626771_CGAGCCAAGGAGTCTG-1  | GSM4626771 | OA |
| GSM4626771_CGAGCCACATTACCTT-1  | GSM4626771 | OA |
| GSM4626771_CGAGCCACATTGGCGC-1  | GSM4626771 | OA |
| GSM4626771_CGAGCCAGTCAGATAA-1  | GSM4626771 | OA |
| GSM4626771_CGAGCCAGTCTGCAAT-1  | GSM4626771 | OA |
| GSM4626771_CGAGCCATCCTATGTT-1  | GSM4626771 | OA |
| GSM4626771_CGAGCCATCGTCTGCT-1  | GSM4626771 | OA |
| GSM4626771_CGAGCCATCTTCGGTC-1  | GSM4626771 | OA |
| GSM4626771_CGATCGGAGACTTTCG-1  | GSM4626771 | OA |
| GSM4626771_CGATCGGAGAGCTGGT-1  | GSM4626771 | OA |
| GSM4626771_CGATCGGCAATGTTGC-1  | GSM4626771 | OA |
| GSM4626771_CGATCGGCATACCATG-1  | GSM4626771 | OA |
| GSM4626771_CGATCGGGTCCGAACC-1  | GSM4626771 | OA |
| GSM4626771_CGATCGGTCACAAACC-1  | GSM4626771 | OA |
| GSM4626771_CGATCGGTCGAATCCA-1  | GSM4626771 | OA |
| GSM4626771_CGATCGGTCGCACTCT-1  | GSM4626771 | OA |
| GSM4626771_CGATCGGTCGGGAGTA-1  | GSM4626771 | OA |
| GSM4626771_CGATCGGTCGTTACAG-1  | GSM4626771 | OA |
| GSM4626771_CGATCGGTCCTACTTAC-1 | GSM4626771 | OA |
| GSM4626771_CGATCGGTCCTTACAC-1  | GSM4626771 | OA |
| GSM4626771_CGATGGCAGAAACGCC-1  | GSM4626771 | OA |
| GSM4626771_CGATGGCAGGGATACC-1  | GSM4626771 | OA |
| GSM4626771_CGATGGCCAAGTTAAG-1  | GSM4626771 | OA |
| GSM4626771_CGATGGCCACATTTCT-1  | GSM4626771 | OA |
| GSM4626771_CGATGGCCATTAGGCT-1  | GSM4626771 | OA |
| GSM4626771_CGATGGCGTACCTACA-1  | GSM4626771 | OA |
| GSM4626771_CGATGGCGTCGCATCG-1  | GSM4626771 | OA |
| GSM4626771_CGATGGCTCAAGATCC-1  | GSM4626771 | OA |
| GSM4626771_CGATGGCTCACCCGAG-1  | GSM4626771 | OA |
| GSM4626771_CGATGGCTCAGCGACC-1  | GSM4626771 | OA |
| GSM4626771_CGATGGCTCATTATCC-1  | GSM4626771 | OA |
| GSM4626771_CGATGGCTCCACGCAG-1  | GSM4626771 | OA |



|                                |            |    |
|--------------------------------|------------|----|
| GSM4626771_CGATGGCTCCATGAGT-1  | GSM4626771 | OA |
| GSM4626771_CGATGGCTCTTACCGC-1  | GSM4626771 | OA |
| GSM4626771_CGATGTAAGTACGTTT-1  | GSM4626771 | OA |
| GSM4626771_CGATGTAAGTGGTAAT-1  | GSM4626771 | OA |
| GSM4626771_CGATGTACACAAGACG-1  | GSM4626771 | OA |
| GSM4626771_CGATGTAGTATGAATG-1  | GSM4626771 | OA |
| GSM4626771_CGATGTAGTGGGTATG-1  | GSM4626771 | OA |
| GSM4626771_CGATGTAGTGGTCTCG-1  | GSM4626771 | OA |
| GSM4626771_CGATGTAGTTCAGACT-1  | GSM4626771 | OA |
| GSM4626771_CGATGTATCACAACC-1   | GSM4626771 | OA |
| GSM4626771_CGATGTATCATCACCC-1  | GSM4626771 | OA |
| GSM4626771_CGATGTATCTCTTGAT-1  | GSM4626771 | OA |
| GSM4626771_CGATGTATCTTTACGT-1  | GSM4626771 | OA |
| GSM4626771_CGATTGAAGAAACCTA-1  | GSM4626771 | OA |
| GSM4626771_CGATTGAAGGAGCGTT-1  | GSM4626771 | OA |
| GSM4626771_CGATTGACATCACGTA-1  | GSM4626771 | OA |
| GSM4626771_CGATTGACATCTATGG-1  | GSM4626771 | OA |
| GSM4626771_CGATTGAGTATTACCG-1  | GSM4626771 | OA |
| GSM4626771_CGATTGAGTGCGCTTG-1  | GSM4626771 | OA |
| GSM4626771_CGATTGAGTGTTTGGT-1  | GSM4626771 | OA |
| GSM4626771_CGATTGAGTTCCGTCT-1  | GSM4626771 | OA |
| GSM4626771_CGATTGATCCCTTG TG-1 | GSM4626771 | OA |
| GSM4626771_CGATTGATCGAGAACG-1  | GSM4626771 | OA |
| GSM4626771_CGATTGATCGGTTCCGG-1 | GSM4626771 | OA |
| GSM4626771_CGATTGATCTCGCTTG-1  | GSM4626771 | OA |
| GSM4626771_CGATTGATCTCTGTCTG-1 | GSM4626771 | OA |
| GSM4626771_CGCCAAGAGAGACTTA-1  | GSM4626771 | OA |
| GSM4626771_CGCCAAGAGGCTAGGT-1  | GSM4626771 | OA |
| GSM4626771_CGCCAAGAGGGCTCTC-1  | GSM4626771 | OA |
| GSM4626771_CGCCAAGCAATGTTGC-1  | GSM4626771 | OA |
| GSM4626771_CGCCAAGGTAAAGTCA-1  | GSM4626771 | OA |
| GSM4626771_CGCCAAGGTAGGAGTC-1  | GSM4626771 | OA |
| GSM4626771_CGCCAAGGTTCTGTTT-1  | GSM4626771 | OA |
| GSM4626771_CGCCAAGGTTGAGGTG-1  | GSM4626771 | OA |
| GSM4626771_CGCCAAGTCACCAGGC-1  | GSM4626771 | OA |
| GSM4626771_CGCCAAGTCATGCAAC-1  | GSM4626771 | OA |
| GSM4626771_CGCGGTAAGACTGTAA-1  | GSM4626771 | OA |
| GSM4626771_CGCGGTAAGATAGCAT-1  | GSM4626771 | OA |
| GSM4626771_CGCGGTAAGTGATAT-1   | GSM4626771 | OA |
| GSM4626771_CGCGGTAAGTCGTTTG-1  | GSM4626771 | OA |
| GSM4626771_CGCGGTACAACACCTA-1  | GSM4626771 | OA |
| GSM4626771_CGCGGTACACTTAACG-1  | GSM4626771 | OA |
| GSM4626771_CGCGGTACATATACCG-1  | GSM4626771 | OA |
| GSM4626771_CGCGGTACATCAGTAC-1  | GSM4626771 | OA |
| GSM4626771_CGCGGTAGTAGCCTCG-1  | GSM4626771 | OA |
| GSM4626771_CGCGGTAGTCTAGGTT-1  | GSM4626771 | OA |
| GSM4626771_CGCGGTAGTGCGAAAC-1  | GSM4626771 | OA |
| GSM4626771_CGCGGTAGTTAAGTAG-1  | GSM4626771 | OA |
| GSM4626771_CGCGGTAGTTGTGGAG-1  | GSM4626771 | OA |
| GSM4626771_CGCGGTATCACTTCAT-1  | GSM4626771 | OA |
| GSM4626771_CGCGGTATCAGCATGT-1  | GSM4626771 | OA |
| GSM4626771_CGCGTTTTAGAGTAAGG-1 | GSM4626771 | OA |
| GSM4626771_CGCGTTTTAGATAGCAT-1 | GSM4626771 | OA |
| GSM4626771_CGCGTTTTAGGCTAGGT-1 | GSM4626771 | OA |
| GSM4626771_CGCGTTTTCAATGGACG-1 | GSM4626771 | OA |
| GSM4626771_CGCGTTTTCACATTAGC-1 | GSM4626771 | OA |
| GSM4626771_CGCGTTTTCCGCGTTT-1  | GSM4626771 | OA |

|                                |            |    |
|--------------------------------|------------|----|
| GSM4626771_CGCTATCAGCGGATCA-1  | GSM4626771 | OA |
| GSM4626771_CGCTATCAGGGAGTAA-1  | GSM4626771 | OA |
| GSM4626771_CGCTATCAGTCCGGTC-1  | GSM4626771 | OA |
| GSM4626771_CGCTATCGTAGGGTAC-1  | GSM4626771 | OA |
| GSM4626771_CGCTATCGTTCGTCTC-1  | GSM4626771 | OA |
| GSM4626771_CGCTATCTCGCGTAGC-1  | GSM4626771 | OA |
| GSM4626771_CGCTGGAAGGGCTTCC-1  | GSM4626771 | OA |
| GSM4626771_CGCTGGACACCTATCC-1  | GSM4626771 | OA |
| GSM4626771_CGCTGGACATGGAATA-1  | GSM4626771 | OA |
| GSM4626771_CGCTGGACATGTAAGA-1  | GSM4626771 | OA |
| GSM4626771_CGCTGGAGTACTCGCG-1  | GSM4626771 | OA |
| GSM4626771_CGCTGGATCATTATCC-1  | GSM4626771 | OA |
| GSM4626771_CGCTGGATCATTGCGA-1  | GSM4626771 | OA |
| GSM4626771_CGCTGGATCCGAATGT-1  | GSM4626771 | OA |
| GSM4626771_CGCTGGATCGCTGATA-1  | GSM4626771 | OA |
| GSM4626771_CGCTTCAAGACTGTAA-1  | GSM4626771 | OA |
| GSM4626771_CGCTTCAAGCGATTCT-1  | GSM4626771 | OA |
| GSM4626771_CGCTTCAAGGTCTCG-1   | GSM4626771 | OA |
| GSM4626771_CGCTTCAGTAAGAGAG-1  | GSM4626771 | OA |
| GSM4626771_CGCTTCAGTCACTGGC-1  | GSM4626771 | OA |
| GSM4626771_CGCTTCAGTGTTAAGA-1  | GSM4626771 | OA |
| GSM4626771_CGCTTCAGTTACCGAT-1  | GSM4626771 | OA |
| GSM4626771_CGCTTCATCATCGATG-1  | GSM4626771 | OA |
| GSM4626771_CGCTTCATCGTGGTTCG-1 | GSM4626771 | OA |
| GSM4626771_CGGACACAGACCTAGG-1  | GSM4626771 | OA |
| GSM4626771_CGGACACAGACCTTTG-1  | GSM4626771 | OA |
| GSM4626771_CGGACACAGCGATCCC-1  | GSM4626771 | OA |
| GSM4626771_CGGACACGTCAAACCTC-1 | GSM4626771 | OA |
| GSM4626771_CGGACACTCACATGCA-1  | GSM4626771 | OA |
| GSM4626771_CGGACACTCGGCGCAT-1  | GSM4626771 | OA |
| GSM4626771_CGGACACTCTTTAGGG-1  | GSM4626771 | OA |
| GSM4626771_CGGACGTAGTCCGTAT-1  | GSM4626771 | OA |
| GSM4626771_CGGACGTCAAGGGTCA-1  | GSM4626771 | OA |
| GSM4626771_CGGACGTCAACGATT-1   | GSM4626771 | OA |
| GSM4626771_CGGACGTGTAGAAGGA-1  | GSM4626771 | OA |
| GSM4626771_CGGACGTGTGGTAACG-1  | GSM4626771 | OA |
| GSM4626771_CGGACGTTCATGTCTT-1  | GSM4626771 | OA |
| GSM4626771_CGGACGTTCGTCGTTT-1  | GSM4626771 | OA |
| GSM4626771_CGGACTGAGACAGAGA-1  | GSM4626771 | OA |
| GSM4626771_CGGACTGAGGTAGCCA-1  | GSM4626771 | OA |
| GSM4626771_CGGACTGCAACCGCCA-1  | GSM4626771 | OA |
| GSM4626771_CGGACTGTCGGCGCAT-1  | GSM4626771 | OA |
| GSM4626771_CGGACTGTCGGTCCGA-1  | GSM4626771 | OA |
| GSM4626771_CGGACTGTCTTCTGGC-1  | GSM4626771 | OA |
| GSM4626771_CGGAGCTAGACAGACC-1  | GSM4626771 | OA |
| GSM4626771_CGGAGCTAGCTAACAA-1  | GSM4626771 | OA |
| GSM4626771_CGGAGCTAGCTAGGCA-1  | GSM4626771 | OA |
| GSM4626771_CGGAGCTAGTGGAGTC-1  | GSM4626771 | OA |
| GSM4626771_CGGAGCTCAGTATAAG-1  | GSM4626771 | OA |
| GSM4626771_CGGAGCTGTCTCCATC-1  | GSM4626771 | OA |
| GSM4626771_CGGAGCTGTGCCTTGG-1  | GSM4626771 | OA |
| GSM4626771_CGGAGCTGTTATGCGT-1  | GSM4626771 | OA |
| GSM4626771_CGGAGCTGTTGCGTTA-1  | GSM4626771 | OA |
| GSM4626771_CGGAGCTTCAACACAC-1  | GSM4626771 | OA |
| GSM4626771_CGGAGTCAGGCTAGGT-1  | GSM4626771 | OA |
| GSM4626771_CGGAGTCCAAAGAATC-1  | GSM4626771 | OA |
| GSM4626771_CGGAGTCCAGGACCCT-1  | GSM4626771 | OA |

|                                |            |    |
|--------------------------------|------------|----|
| GSM4626771_CGGAGTCGTAAACGCG-1  | GSM4626771 | OA |
| GSM4626771_CGGAGTCGTCAGCTAT-1  | GSM4626771 | OA |
| GSM4626771_CGGAGTCGTCCCTTGT-1  | GSM4626771 | OA |
| GSM4626771_CGGAGTCTCGCGTTTC-1  | GSM4626771 | OA |
| GSM4626771_CGGCTAGAGCAATCTC-1  | GSM4626771 | OA |
| GSM4626771_CGGCTAGAGCGATTCT-1  | GSM4626771 | OA |
| GSM4626771_CGGCTAGAGGTGTGGT-1  | GSM4626771 | OA |
| GSM4626771_CGGCTAGCACATGACT-1  | GSM4626771 | OA |
| GSM4626771_CGGCTAGGTCATATGC-1  | GSM4626771 | OA |
| GSM4626771_CGGCTAGGTCCGCTGA-1  | GSM4626771 | OA |
| GSM4626771_CGGCTAGGTCTAGTCA-1  | GSM4626771 | OA |
| GSM4626771_CGGCTAGGTGTAAGTA-1  | GSM4626771 | OA |
| GSM4626771_CGGCTAGTCACCTCGT-1  | GSM4626771 | OA |
| GSM4626771_CGGCTAGTCCTCATT-1   | GSM4626771 | OA |
| GSM4626771_CGGGTCACAAAGCAAT-1  | GSM4626771 | OA |
| GSM4626771_CGGGTCACATAAGACA-1  | GSM4626771 | OA |
| GSM4626771_CGGGTCAGTCGAACAG-1  | GSM4626771 | OA |
| GSM4626771_CGGGTCAGTTCGGCAC-1  | GSM4626771 | OA |
| GSM4626771_CGGGTCAGTTTGTGG-1   | GSM4626771 | OA |
| GSM4626771_CGGGTCATCAGGCCCA-1  | GSM4626771 | OA |
| GSM4626771_CGGTTAAAGACCACGA-1  | GSM4626771 | OA |
| GSM4626771_CGGTTAAAGAGTTGGC-1  | GSM4626771 | OA |
| GSM4626771_CGGTTAAAGCGCCTTG-1  | GSM4626771 | OA |
| GSM4626771_CGGTTAAAGGGAACGG-1  | GSM4626771 | OA |
| GSM4626771_CGGTTAAACAAAGCAAT-1 | GSM4626771 | OA |
| GSM4626771_CGGTTAACAAACACGCC-1 | GSM4626771 | OA |
| GSM4626771_CGGTTAACATCTCGCT-1  | GSM4626771 | OA |
| GSM4626771_CGGTTAAGTGGCCCTA-1  | GSM4626771 | OA |
| GSM4626771_CGGTTAATCAGGCCCA-1  | GSM4626771 | OA |
| GSM4626771_CGGTTAATCATTCACT-1  | GSM4626771 | OA |
| GSM4626771_CGGTTAATCCTGCTTG-1  | GSM4626771 | OA |
| GSM4626771_CGGTTAATCTCTGAGA-1  | GSM4626771 | OA |
| GSM4626771_CGTAGCGAGAGTGAGA-1  | GSM4626771 | OA |
| GSM4626771_CGTAGCGCACAAAGACG-1 | GSM4626771 | OA |
| GSM4626771_CGTAGCGCAGCGTAAG-1  | GSM4626771 | OA |
| GSM4626771_CGTAGCGGTAGCCTAT-1  | GSM4626771 | OA |
| GSM4626771_CGTAGCGGTCAAAGCG-1  | GSM4626771 | OA |
| GSM4626771_CGTAGCGGTCTTCAAG-1  | GSM4626771 | OA |
| GSM4626771_CGTAGGCAGATAGTCA-1  | GSM4626771 | OA |
| GSM4626771_CGTAGGCAGCAGCCTC-1  | GSM4626771 | OA |
| GSM4626771_CGTAGGCAGCGTTGCC-1  | GSM4626771 | OA |
| GSM4626771_CGTAGGCAGTGCGATG-1  | GSM4626771 | OA |
| GSM4626771_CGTAGGCAGTTTTCGT-1  | GSM4626771 | OA |
| GSM4626771_CGTAGGCCATCTCGCT-1  | GSM4626771 | OA |
| GSM4626771_CGTAGGCCGTCGGTCT-1  | GSM4626771 | OA |
| GSM4626771_CGTAGGCCGTGAGGGTT-1 | GSM4626771 | OA |
| GSM4626771_CGTAGGCCGTGCCTGCA-1 | GSM4626771 | OA |
| GSM4626771_CGTAGGCCGTGGTCCGT-1 | GSM4626771 | OA |
| GSM4626771_CGTAGGCCGTTGTCTTT-1 | GSM4626771 | OA |
| GSM4626771_CGTAGGCTCCGTCATC-1  | GSM4626771 | OA |
| GSM4626771_CGTAGGCTCGCCGTGA-1  | GSM4626771 | OA |
| GSM4626771_CGTAGGCTCTAACTCT-1  | GSM4626771 | OA |
| GSM4626771_CGTAGGCTCTCTGCTG-1  | GSM4626771 | OA |
| GSM4626771_CGTAGGCTCTTTAGGG-1  | GSM4626771 | OA |
| GSM4626771_CGTCACTAGGGATACC-1  | GSM4626771 | OA |
| GSM4626771_CGTCACTCATCAGTCA-1  | GSM4626771 | OA |
| GSM4626771_CGTCACTGTGTATGGG-1  | GSM4626771 | OA |

|                                |            |    |
|--------------------------------|------------|----|
| GSM4626771_CGTCACTTCGCCGTGA-1  | GSM4626771 | OA |
| GSM4626771_CGTCAGGAGACAGGCT-1  | GSM4626771 | OA |
| GSM4626771_CGTCAGGAGAGGTAGA-1  | GSM4626771 | OA |
| GSM4626771_CGTCAGGAGGCTCTTA-1  | GSM4626771 | OA |
| GSM4626771_CGTCAGGAGGTCATCT-1  | GSM4626771 | OA |
| GSM4626771_CGTCAGGAGTTTCCTT-1  | GSM4626771 | OA |
| GSM4626771_CGTCAGGTCACAAACC-1  | GSM4626771 | OA |
| GSM4626771_CGTCAGGTCATTCCT-1   | GSM4626771 | OA |
| GSM4626771_CGTCAGGTCGCAAGC-1   | GSM4626771 | OA |
| GSM4626771_CGTCAGGTCGGCTACG-1  | GSM4626771 | OA |
| GSM4626771_CGTCAGGTCGTACCGG-1  | GSM4626771 | OA |
| GSM4626771_CGTCAGGTCGTTACGA-1  | GSM4626771 | OA |
| GSM4626771_CGTCAGGTCCTACTATC-1 | GSM4626771 | OA |
| GSM4626771_CGTCAGGTCCTCCTATA-1 | GSM4626771 | OA |
| GSM4626771_CGTCAGGTCCTTAGGG-1  | GSM4626771 | OA |
| GSM4626771_CGTCCATAGACAAAGG-1  | GSM4626771 | OA |
| GSM4626771_CGTCCATAGACGCTTT-1  | GSM4626771 | OA |
| GSM4626771_CGTCCATAGAGTAAGG-1  | GSM4626771 | OA |
| GSM4626771_CGTCCATAGCAGCCTC-1  | GSM4626771 | OA |
| GSM4626771_CGTCCATAGGCAATTA-1  | GSM4626771 | OA |
| GSM4626771_CGTCCATCAAACCTAC-1  | GSM4626771 | OA |
| GSM4626771_CGTCCATCACACCGAC-1  | GSM4626771 | OA |
| GSM4626771_CGTCCATCAGCTTCGG-1  | GSM4626771 | OA |
| GSM4626771_CGTCCATGTTCTGTTT-1  | GSM4626771 | OA |
| GSM4626771_CGTCCATTCTGGTATG-1  | GSM4626771 | OA |
| GSM4626771_CGTCCATTCTTGCCGT-1  | GSM4626771 | OA |
| GSM4626771_CGTCTACAGCCCTAAT-1  | GSM4626771 | OA |
| GSM4626771_CGTCTACAGCTGAAAT-1  | GSM4626771 | OA |
| GSM4626771_CGTCTACAGTGCCAGA-1  | GSM4626771 | OA |
| GSM4626771_CGTCTACCAAGACACG-1  | GSM4626771 | OA |
| GSM4626771_CGTCTACCACAAGACG-1  | GSM4626771 | OA |
| GSM4626771_CGTCTACGTGAGTGAC-1  | GSM4626771 | OA |
| GSM4626771_CGTCTACGTGTAAGTA-1  | GSM4626771 | OA |
| GSM4626771_CGTCTACTCCATTCTA-1  | GSM4626771 | OA |
| GSM4626771_CGTGAGCAGTCTCGGC-1  | GSM4626771 | OA |
| GSM4626771_CGTGAGCCAATGGAAT-1  | GSM4626771 | OA |
| GSM4626771_CGTGAGCCACCTATCC-1  | GSM4626771 | OA |
| GSM4626771_CGTGAGCCACTGCCAG-1  | GSM4626771 | OA |
| GSM4626771_CGTGAGCCAGCGATCC-1  | GSM4626771 | OA |
| GSM4626771_CGTGAGCCATGCGCAC-1  | GSM4626771 | OA |
| GSM4626771_CGTGAGCGTAAGAGAG-1  | GSM4626771 | OA |
| GSM4626771_CGTGAGCGTTCCACAA-1  | GSM4626771 | OA |
| GSM4626771_CGTGAGCTCTTCAACT-1  | GSM4626771 | OA |
| GSM4626771_CGTGTAAAGAGCAATT-1  | GSM4626771 | OA |
| GSM4626771_CGTGTAAAGCCACCTG-1  | GSM4626771 | OA |
| GSM4626771_CGTGTAAAGTGTGAAT-1  | GSM4626771 | OA |
| GSM4626771_CGTGTAAACACAGGAGT-1 | GSM4626771 | OA |
| GSM4626771_CGTGTAAAGTACTTGAC-1 | GSM4626771 | OA |
| GSM4626771_CGTGTAAATCACAGTAC-1 | GSM4626771 | OA |
| GSM4626771_CGTGTAAATCAGCAT-1   | GSM4626771 | OA |
| GSM4626771_CGTGTAAATCTCGCTTG-1 | GSM4626771 | OA |
| GSM4626771_CGTGTAAATCTGTCTCG-1 | GSM4626771 | OA |
| GSM4626771_CGTGTCTAGCGACGTA-1  | GSM4626771 | OA |
| GSM4626771_CGTGTCTCAATGTAAG-1  | GSM4626771 | OA |
| GSM4626771_CGTGTCTCACCTGGTG-1  | GSM4626771 | OA |
| GSM4626771_CGTGTCTCAGATTGCT-1  | GSM4626771 | OA |
| GSM4626771_CGTGTCTCAGCGTCCA-1  | GSM4626771 | OA |

|                                |            |    |
|--------------------------------|------------|----|
| GSM4626771_CGTGTCTCAGCTCCGA-1  | GSM4626771 | OA |
| GSM4626771_CGTGTCTCATGGGAAC-1  | GSM4626771 | OA |
| GSM4626771_CGTGTCTCATTTTCAGG-1 | GSM4626771 | OA |
| GSM4626771_CGTGTCTGTAGATTAG-1  | GSM4626771 | OA |
| GSM4626771_CGTGTCTGTCACACGC-1  | GSM4626771 | OA |
| GSM4626771_CGTGTCTGTCTGCCAG-1  | GSM4626771 | OA |
| GSM4626771_CGTGTCTTCGTCTGAA-1  | GSM4626771 | OA |
| GSM4626771_CGTTAGAAGCCCTAAT-1  | GSM4626771 | OA |
| GSM4626771_CGTTAGAAGGAATGGA-1  | GSM4626771 | OA |
| GSM4626771_CGTTAGAAGGCTACGA-1  | GSM4626771 | OA |
| GSM4626771_CGTTAGACAATCGGTT-1  | GSM4626771 | OA |
| GSM4626771_CGTTAGACAGTGACAG-1  | GSM4626771 | OA |
| GSM4626771_CGTTAGACATCCGCGA-1  | GSM4626771 | OA |
| GSM4626771_CGTTAGACATTGAGCT-1  | GSM4626771 | OA |
| GSM4626771_CGTTAGAGTAGCGCAA-1  | GSM4626771 | OA |
| GSM4626771_CGTTAGAGTCCCTTGT-1  | GSM4626771 | OA |
| GSM4626771_CGTTAGAGTGACGGTA-1  | GSM4626771 | OA |
| GSM4626771_CGTTAGAGTGCAGACA-1  | GSM4626771 | OA |
| GSM4626771_CGTTAGAGTTAAGTAG-1  | GSM4626771 | OA |
| GSM4626771_CGTTAGATCACAACGT-1  | GSM4626771 | OA |
| GSM4626771_CGTTAGATCATATCGG-1  | GSM4626771 | OA |
| GSM4626771_CGTTAGATCATCACCC-1  | GSM4626771 | OA |
| GSM4626771_CGTTAGATCCATGAGT-1  | GSM4626771 | OA |
| GSM4626771_CGTTCTGAGGATGGAA-1  | GSM4626771 | OA |
| GSM4626771_CGTTCTGAGTATCGAA-1  | GSM4626771 | OA |
| GSM4626771_CGTTCTGCACATGGGA-1  | GSM4626771 | OA |
| GSM4626771_CGTTCTGGTCAGCTAT-1  | GSM4626771 | OA |
| GSM4626771_CGTTCTGGTCTAGTCA-1  | GSM4626771 | OA |
| GSM4626771_CGTTCTGGTCTCCCTA-1  | GSM4626771 | OA |
| GSM4626771_CGTTCTGGTGCACCTTA-1 | GSM4626771 | OA |
| GSM4626771_CGTTCTGGTGGGTATG-1  | GSM4626771 | OA |
| GSM4626771_CGTTCTGTCCATTCTA-1  | GSM4626771 | OA |
| GSM4626771_CGTTCTGTCTTGGGTA-1  | GSM4626771 | OA |
| GSM4626771_CGTTGGGAGATCGATA-1  | GSM4626771 | OA |
| GSM4626771_CGTTGGGAGGCGATAC-1  | GSM4626771 | OA |
| GSM4626771_CGTTGGGAGGTAGCTG-1  | GSM4626771 | OA |
| GSM4626771_CGTTGGGCACATTCGA-1  | GSM4626771 | OA |
| GSM4626771_CGTTGGGCACCACCAG-1  | GSM4626771 | OA |
| GSM4626771_CGTTGGGGTAAACACA-1  | GSM4626771 | OA |
| GSM4626771_CGTTGGGGTATTCGTG-1  | GSM4626771 | OA |
| GSM4626771_CGTTGGGGTGTAAGTA-1  | GSM4626771 | OA |
| GSM4626771_CGTTGGGGTTATCGGT-1  | GSM4626771 | OA |
| GSM4626771_CGTTGGGGTTCAGCGC-1  | GSM4626771 | OA |
| GSM4626771_CGTTGGGGTTCATGGT-1  | GSM4626771 | OA |
| GSM4626771_CGTTGGGTCTCAACTT-1  | GSM4626771 | OA |
| GSM4626771_CGTTGGGTCTTAGCCC-1  | GSM4626771 | OA |
| GSM4626771_CTAACCTTAGCCAGTAG-1 | GSM4626771 | OA |
| GSM4626771_CTAACCTTAGGAATGGA-1 | GSM4626771 | OA |
| GSM4626771_CTAACCTTAGTCTCAAC-1 | GSM4626771 | OA |
| GSM4626771_CTAACCTCACCGGAAA-1  | GSM4626771 | OA |
| GSM4626771_CTAACCTCATCACCCCT-1 | GSM4626771 | OA |
| GSM4626771_CTAACCTTGTAAGGGCT-1 | GSM4626771 | OA |
| GSM4626771_CTAACCTTGTCGGCTCA-1 | GSM4626771 | OA |
| GSM4626771_CTAACCTGTCTGCAAT-1  | GSM4626771 | OA |
| GSM4626771_CTAACCTGTGCTGTAT-1  | GSM4626771 | OA |
| GSM4626771_CTAACCTTCCAGTAGT-1  | GSM4626771 | OA |
| GSM4626771_CTAACCTTCCCATTTA-1  | GSM4626771 | OA |

|                                |            |    |
|--------------------------------|------------|----|
| GSM4626771_CTAAGACAGGTCGGAT-1  | GSM4626771 | OA |
| GSM4626771_CTAAGACCATCCCATC-1  | GSM4626771 | OA |
| GSM4626771_CTAAGACGTAAGGGAA-1  | GSM4626771 | OA |
| GSM4626771_CTAAGACGTATGAAAC-1  | GSM4626771 | OA |
| GSM4626771_CTAAGACGTCCTCCAT-1  | GSM4626771 | OA |
| GSM4626771_CTAAGACGTGTTGGGA-1  | GSM4626771 | OA |
| GSM4626771_CTAAGACTCAACGGGA-1  | GSM4626771 | OA |
| GSM4626771_CTAAGACTCTAACTCT-1  | GSM4626771 | OA |
| GSM4626771_CTAATGGAGGCGCTCT-1  | GSM4626771 | OA |
| GSM4626771_CTAATGGAGTAATCCC-1  | GSM4626771 | OA |
| GSM4626771_CTAATGGGTATTACCG-1  | GSM4626771 | OA |
| GSM4626771_CTAATGGGTCATCGGC-1  | GSM4626771 | OA |
| GSM4626771_CTAATGGGTGCAGTAG-1  | GSM4626771 | OA |
| GSM4626771_CTAATGGTCATGTAGC-1  | GSM4626771 | OA |
| GSM4626771_CTAATGGTCCAAACAC-1  | GSM4626771 | OA |
| GSM4626771_CTAATGGTCGAATGCT-1  | GSM4626771 | OA |
| GSM4626771_CTACACCAGAAAGTGG-1  | GSM4626771 | OA |
| GSM4626771_CTACACCAGACACGAC-1  | GSM4626771 | OA |
| GSM4626771_CTACACCAGCTAACTC-1  | GSM4626771 | OA |
| GSM4626771_CTACACCAGGCTCATT-1  | GSM4626771 | OA |
| GSM4626771_CTACACCAGTCAAGCG-1  | GSM4626771 | OA |
| GSM4626771_CTACACCAGTTTGCCT-1  | GSM4626771 | OA |
| GSM4626771_CTACACCCAAGTAGTA-1  | GSM4626771 | OA |
| GSM4626771_CTACACCGTCACTTCC-1  | GSM4626771 | OA |
| GSM4626771_CTACACCTCACCAGGT-1  | GSM4626771 | OA |
| GSM4626771_CTACACCTCAGTGCAT-1  | GSM4626771 | OA |
| GSM4626771_CTACATTAGCGTCTAT-1  | GSM4626771 | OA |
| GSM4626771_CTACATTAGCTAGTCT-1  | GSM4626771 | OA |
| GSM4626771_CTACATTAGGAATCGC-1  | GSM4626771 | OA |
| GSM4626771_CTACATTAGGCACATG-1  | GSM4626771 | OA |
| GSM4626771_CTACATTAGGGTTCCC-1  | GSM4626771 | OA |
| GSM4626771_CTACATTAGTATGACA-1  | GSM4626771 | OA |
| GSM4626771_CTACATTAGTGTGGCA-1  | GSM4626771 | OA |
| GSM4626771_CTACATTCAAGAAAGG-1  | GSM4626771 | OA |
| GSM4626771_CTACATTGTACCCAAT-1  | GSM4626771 | OA |
| GSM4626771_CTACATTGTAGCGTGA-1  | GSM4626771 | OA |
| GSM4626771_CTACATTGTATAAACG-1  | GSM4626771 | OA |
| GSM4626771_CTACATTGTCATATGC-1  | GSM4626771 | OA |
| GSM4626771_CTACATTGTGTAACGG-1  | GSM4626771 | OA |
| GSM4626771_CTACATTTACGCATA-1   | GSM4626771 | OA |
| GSM4626771_CTACATTTCCATGCTC-1  | GSM4626771 | OA |
| GSM4626771_CTACATTTCTCAACTT-1  | GSM4626771 | OA |
| GSM4626771_CTACCCAAGCTGCCCA-1  | GSM4626771 | OA |
| GSM4626771_CTACCCAAGGAGTAGA-1  | GSM4626771 | OA |
| GSM4626771_CTACCCACATTTGCTT-1  | GSM4626771 | OA |
| GSM4626771_CTACCCAGTGAGTGAC-1  | GSM4626771 | OA |
| GSM4626771_CTACCCAGTGTAATGA-1  | GSM4626771 | OA |
| GSM4626771_CTACCCATCGCCTGTT-1  | GSM4626771 | OA |
| GSM4626771_CTACCCATCGGTTAAC-1  | GSM4626771 | OA |
| GSM4626771_CTACCCATCGTCGTTT-1  | GSM4626771 | OA |
| GSM4626771_CTACCCATCTAACTCT-1  | GSM4626771 | OA |
| GSM4626771_CTACGTCAGGCAGTCA-1  | GSM4626771 | OA |
| GSM4626771_CTACGTCAGTCCAGGA-1  | GSM4626771 | OA |
| GSM4626771_CTACGTCCAAGGTGTG-1  | GSM4626771 | OA |
| GSM4626771_CTACGTCCACCTTGTC-1  | GSM4626771 | OA |
| GSM4626771_CTACGTCCATTTCACT-1  | GSM4626771 | OA |
| GSM4626771_CTACGTTCGTATGAATG-1 | GSM4626771 | OA |

|                               |            |    |
|-------------------------------|------------|----|
| GSM4626771_CTACGTCTCAGTTAGC-1 | GSM4626771 | OA |
| GSM4626771_CTACGTCTCAGTTTGG-1 | GSM4626771 | OA |
| GSM4626771_CTACGTCTCGCCAGCA-1 | GSM4626771 | OA |
| GSM4626771_CTACGTCTCTACGAGT-1 | GSM4626771 | OA |
| GSM4626771_CTACGTCTCTCCCTGA-1 | GSM4626771 | OA |
| GSM4626771_CTACGTCTCTGTCCGT-1 | GSM4626771 | OA |
| GSM4626771_CTAGAGTCAGCGTAAG-1 | GSM4626771 | OA |
| GSM4626771_CTAGAGTCAGTAACGG-1 | GSM4626771 | OA |
| GSM4626771_CTAGAGTGTGGTCTCG-1 | GSM4626771 | OA |
| GSM4626771_CTAGAGTGTGTATGGG-1 | GSM4626771 | OA |
| GSM4626771_CTAGAGTGTGTTGGGA-1 | GSM4626771 | OA |
| GSM4626771_CTAGCCTAGGGTATCG-1 | GSM4626771 | OA |
| GSM4626771_CTAGCCTCAACAACCT-1 | GSM4626771 | OA |
| GSM4626771_CTAGCCTCAAGAGGCT-1 | GSM4626771 | OA |
| GSM4626771_CTAGCCTCAAGCCTAT-1 | GSM4626771 | OA |
| GSM4626771_CTAGCCTCACGAAAGC-1 | GSM4626771 | OA |
| GSM4626771_CTAGCCTCATAAGACA-1 | GSM4626771 | OA |
| GSM4626771_CTAGCCTGTAGCGCTC-1 | GSM4626771 | OA |
| GSM4626771_CTAGCCTGTGCTGTAT-1 | GSM4626771 | OA |
| GSM4626771_CTAGCCTGTTCTCATT-1 | GSM4626771 | OA |
| GSM4626771_CTAGCCTTCACTTCAT-1 | GSM4626771 | OA |
| GSM4626771_CTAGCCTTCAGCGATT-1 | GSM4626771 | OA |
| GSM4626771_CTAGCCTTCAGTCCCT-1 | GSM4626771 | OA |
| GSM4626771_CTAGCCTTCATAAAGG-1 | GSM4626771 | OA |
| GSM4626771_CTAGCCTTCTCCAACC-1 | GSM4626771 | OA |
| GSM4626771_CTAGCCTTCTTGAGGT-1 | GSM4626771 | OA |
| GSM4626771_CTAGTGAAGACCACGA-1 | GSM4626771 | OA |
| GSM4626771_CTAGTGAAGGGTTCCC-1 | GSM4626771 | OA |
| GSM4626771_CTAGTGAGTCATGCCG-1 | GSM4626771 | OA |
| GSM4626771_CTAGTGAGTGGCCCTA-1 | GSM4626771 | OA |
| GSM4626771_CTAGTGATCGGCTTGG-1 | GSM4626771 | OA |
| GSM4626771_CTAGTGATCTATGTGG-1 | GSM4626771 | OA |
| GSM4626771_CTCACACAGAAGGTGA-1 | GSM4626771 | OA |
| GSM4626771_CTCACACCAAGTACCT-1 | GSM4626771 | OA |
| GSM4626771_CTCACACCAATGTAAG-1 | GSM4626771 | OA |
| GSM4626771_CTCACACTCAGTGTTG-1 | GSM4626771 | OA |
| GSM4626771_CTCACACTCTCAAACG-1 | GSM4626771 | OA |
| GSM4626771_CTCAGAAAGACGACGT-1 | GSM4626771 | OA |
| GSM4626771_CTCAGAAAGGCCCTTG-1 | GSM4626771 | OA |
| GSM4626771_CTCAGAAAGGTAGCTG-1 | GSM4626771 | OA |
| GSM4626771_CTCAGAAAGTCCATAC-1 | GSM4626771 | OA |
| GSM4626771_CTCAGAACAACACCCG-1 | GSM4626771 | OA |
| GSM4626771_CTCAGAACATTTGCTT-1 | GSM4626771 | OA |
| GSM4626771_CTCAGAAGTAAGCACG-1 | GSM4626771 | OA |
| GSM4626771_CTCAGAAGTACATCCA-1 | GSM4626771 | OA |
| GSM4626771_CTCAGAAGTCTCACCT-1 | GSM4626771 | OA |
| GSM4626771_CTCAGAATCACCCGAG-1 | GSM4626771 | OA |
| GSM4626771_CTCAGAATCCTTGACC-1 | GSM4626771 | OA |
| GSM4626771_CTCAGAATCGCCGTGA-1 | GSM4626771 | OA |
| GSM4626771_CTCAGAATCGCGCCAA-1 | GSM4626771 | OA |
| GSM4626771_CTCATTAAGCGTGAGT-1 | GSM4626771 | OA |
| GSM4626771_CTCATTAAGTCTCCTC-1 | GSM4626771 | OA |
| GSM4626771_CTCATTACACTATCTT-1 | GSM4626771 | OA |
| GSM4626771_CTCATTACAGACGTAG-1 | GSM4626771 | OA |
| GSM4626771_CTCATTACAGATGGCA-1 | GSM4626771 | OA |
| GSM4626771_CTCATTACATTAACCG-1 | GSM4626771 | OA |
| GSM4626771_CTCATTAGTCCAGTTA-1 | GSM4626771 | OA |

|                               |            |    |
|-------------------------------|------------|----|
| GSM4626771_CTCATTAGTGAAAGAG-1 | GSM4626771 | OA |
| GSM4626771_CTCATTATCCAAACAC-1 | GSM4626771 | OA |
| GSM4626771_CTCATTATCCAGTATG-1 | GSM4626771 | OA |
| GSM4626771_CTCATTATCGTGACAT-1 | GSM4626771 | OA |
| GSM4626771_CTCATTATCTACCTGC-1 | GSM4626771 | OA |
| GSM4626771_CTCCTAGAGCTAACTC-1 | GSM4626771 | OA |
| GSM4626771_CTCCTAGAGGACATTA-1 | GSM4626771 | OA |
| GSM4626771_CTCCTAGCAAGGTGTG-1 | GSM4626771 | OA |
| GSM4626771_CTCCTAGCACTCTGTC-1 | GSM4626771 | OA |
| GSM4626771_CTCCTAGGTAGTGAAT-1 | GSM4626771 | OA |
| GSM4626771_CTCCTAGGTCCAGTAT-1 | GSM4626771 | OA |
| GSM4626771_CTCCTAGGTGAGGGAG-1 | GSM4626771 | OA |
| GSM4626771_CTCCTAGTCGGACAAG-1 | GSM4626771 | OA |
| GSM4626771_CTCCTAGTCTCCGGTT-1 | GSM4626771 | OA |
| GSM4626771_CTCGAAAAGACACTAA-1 | GSM4626771 | OA |
| GSM4626771_CTCGAAAAGGACGAAA-1 | GSM4626771 | OA |
| GSM4626771_CTCGAAAAGGCTCAGA-1 | GSM4626771 | OA |
| GSM4626771_CTCGAAACAAGTTCTG-1 | GSM4626771 | OA |
| GSM4626771_CTCGAAACATGAACCT-1 | GSM4626771 | OA |
| GSM4626771_CTCGAAATCGCTGATA-1 | GSM4626771 | OA |
| GSM4626771_CTCGAAATCGGAGCAA-1 | GSM4626771 | OA |
| GSM4626771_CTCGAAATCGTCTGAA-1 | GSM4626771 | OA |
| GSM4626771_CTCGAGGAGCAACGGT-1 | GSM4626771 | OA |
| GSM4626771_CTCGAGGAGCCTTGAT-1 | GSM4626771 | OA |
| GSM4626771_CTCGAGGAGGCAGTCA-1 | GSM4626771 | OA |
| GSM4626771_CTCGAGGCAACACCCG-1 | GSM4626771 | OA |
| GSM4626771_CTCGAGGCAATGGAGC-1 | GSM4626771 | OA |
| GSM4626771_CTCGAGGCAGCTCGAC-1 | GSM4626771 | OA |
| GSM4626771_CTCGAGGCAGCTGTGC-1 | GSM4626771 | OA |
| GSM4626771_CTCGAGGCAGGCGATA-1 | GSM4626771 | OA |
| GSM4626771_CTCGAGGCATCCCACT-1 | GSM4626771 | OA |
| GSM4626771_CTCGGAGCACCGTTGG-1 | GSM4626771 | OA |
| GSM4626771_CTCGGAGCACGAAAGC-1 | GSM4626771 | OA |
| GSM4626771_CTCGGAGCACGAGAGT-1 | GSM4626771 | OA |
| GSM4626771_CTCGGAGCATGACGGA-1 | GSM4626771 | OA |
| GSM4626771_CTCGGAGGTCCAGTGC-1 | GSM4626771 | OA |
| GSM4626771_CTCGGAGGTGCGAAAC-1 | GSM4626771 | OA |
| GSM4626771_CTCGGAGGTTAGATGA-1 | GSM4626771 | OA |
| GSM4626771_CTCGGAGGTTCCACGG-1 | GSM4626771 | OA |
| GSM4626771_CTCGGAGGTTGTGGAG-1 | GSM4626771 | OA |
| GSM4626771_CTCGGAGTCATGGTCA-1 | GSM4626771 | OA |
| GSM4626771_CTCGGAGTCCACTCCA-1 | GSM4626771 | OA |
| GSM4626771_CTCGGAGTCCCTAACC-1 | GSM4626771 | OA |
| GSM4626771_CTCGGGAAGATATACG-1 | GSM4626771 | OA |
| GSM4626771_CTCGGGACACCCTATC-1 | GSM4626771 | OA |
| GSM4626771_CTCGGGAGTACAGTGG-1 | GSM4626771 | OA |
| GSM4626771_CTCGGGAGTAGCAAAT-1 | GSM4626771 | OA |
| GSM4626771_CTCGGGATCGCGATCG-1 | GSM4626771 | OA |
| GSM4626771_CTCGGGATCGCGGATC-1 | GSM4626771 | OA |
| GSM4626771_CTCGGGATCTGATACG-1 | GSM4626771 | OA |
| GSM4626771_CTCGTACAGCAATCTC-1 | GSM4626771 | OA |
| GSM4626771_CTCGTACAGGGAACGG-1 | GSM4626771 | OA |
| GSM4626771_CTCGTACAGGTGCTTT-1 | GSM4626771 | OA |
| GSM4626771_CTCGTACAGTGAAGTT-1 | GSM4626771 | OA |
| GSM4626771_CTCGTACAGTGTTAGA-1 | GSM4626771 | OA |
| GSM4626771_CTCGTACCAGGAATGC-1 | GSM4626771 | OA |
| GSM4626771_CTCGTACGTAGGAGTC-1 | GSM4626771 | OA |



|                                |            |    |
|--------------------------------|------------|----|
| GSM4626771_CTCGTACGTCTAGAGG-1  | GSM4626771 | OA |
| GSM4626771_CTCGTACGTGCCTTGG-1  | GSM4626771 | OA |
| GSM4626771_CTCGTACGTTACGCGC-1  | GSM4626771 | OA |
| GSM4626771_CTCGTACTCCACGACG-1  | GSM4626771 | OA |
| GSM4626771_CTCGTACTCCACGCAG-1  | GSM4626771 | OA |
| GSM4626771_CTCGTACTCCTGCCAT-1  | GSM4626771 | OA |
| GSM4626771_CTCGTCAAGACACTAA-1  | GSM4626771 | OA |
| GSM4626771_CTCGTCAAGCGTGTCC-1  | GSM4626771 | OA |
| GSM4626771_CTCGTCAAGTACGATA-1  | GSM4626771 | OA |
| GSM4626771_CTCGTCACAAGCGTAG-1  | GSM4626771 | OA |
| GSM4626771_CTCGTCACACGCTTTC-1  | GSM4626771 | OA |
| GSM4626771_CTCGTCAGTAGAAGGA-1  | GSM4626771 | OA |
| GSM4626771_CTCGTCAGTGGTCTCG-1  | GSM4626771 | OA |
| GSM4626771_CTCGTCAGTTCCACTC-1  | GSM4626771 | OA |
| GSM4626771_CTCGTCATCGACCAGC-1  | GSM4626771 | OA |
| GSM4626771_CTCGTCATCTGCCAGG-1  | GSM4626771 | OA |
| GSM4626771_CTCTAATAGAATTCCC-1  | GSM4626771 | OA |
| GSM4626771_CTCTAATAGCATGGCA-1  | GSM4626771 | OA |
| GSM4626771_CTCTAATAGCGATGAC-1  | GSM4626771 | OA |
| GSM4626771_CTCTAATAGGATCGCA-1  | GSM4626771 | OA |
| GSM4626771_CTCTAATAGTGGAGTC-1  | GSM4626771 | OA |
| GSM4626771_CTCTAATCAGCCAATT-1  | GSM4626771 | OA |
| GSM4626771_CTCTAATGTAAGTTCC-1  | GSM4626771 | OA |
| GSM4626771_CTCTAATGTCATCGGC-1  | GSM4626771 | OA |
| GSM4626771_CTCTAATGTGTCCTCT-1  | GSM4626771 | OA |
| GSM4626771_CTCTAATGTTAAGTAG-1  | GSM4626771 | OA |
| GSM4626771_CTCTAATGTTCGAATC-1  | GSM4626771 | OA |
| GSM4626771_CTCTAATTCAAGATCC-1  | GSM4626771 | OA |
| GSM4626771_CTCTAATTCGCTTGTC-1  | GSM4626771 | OA |
| GSM4626771_CTCTACGGTATATCCG-1  | GSM4626771 | OA |
| GSM4626771_CTCTACGGTATCACCA-1  | GSM4626771 | OA |
| GSM4626771_CTCTACGGTCAATGTC-1  | GSM4626771 | OA |
| GSM4626771_CTCTACGTCCCTGACT-1  | GSM4626771 | OA |
| GSM4626771_CTCTACGTTCGTTTATC-1 | GSM4626771 | OA |
| GSM4626771_CTCTACGTCTAACTCT-1  | GSM4626771 | OA |
| GSM4626771_CTCTACGTCTCGGACG-1  | GSM4626771 | OA |
| GSM4626771_CTCTGGTAGTCCCACG-1  | GSM4626771 | OA |
| GSM4626771_CTCTGGTCACCCAGTG-1  | GSM4626771 | OA |
| GSM4626771_CTCTGGTGTATAGGGC-1  | GSM4626771 | OA |
| GSM4626771_CTCTGGTTCCTGCTTG-1  | GSM4626771 | OA |
| GSM4626771_CTCTGGTTCGAGAGCA-1  | GSM4626771 | OA |
| GSM4626771_CTCTGGTTCGCCAGCA-1  | GSM4626771 | OA |
| GSM4626771_CTGAAACAGACTTGAA-1  | GSM4626771 | OA |
| GSM4626771_CTGAAACAGAGATGAG-1  | GSM4626771 | OA |
| GSM4626771_CTGAAACAGCTGAAAT-1  | GSM4626771 | OA |
| GSM4626771_CTGAAACAGGTAGCCA-1  | GSM4626771 | OA |
| GSM4626771_CTGAAACAGTACGATA-1  | GSM4626771 | OA |
| GSM4626771_CTGAAACAGTTCGCAT-1  | GSM4626771 | OA |
| GSM4626771_CTGAAACCAGCCAGAA-1  | GSM4626771 | OA |
| GSM4626771_CTGAAACCAGGCTGAA-1  | GSM4626771 | OA |
| GSM4626771_CTGAAACTCAAGGTAA-1  | GSM4626771 | OA |
| GSM4626771_CTGAAACTCAGTTTGG-1  | GSM4626771 | OA |
| GSM4626771_CTGAAGTAGACTCGGA-1  | GSM4626771 | OA |
| GSM4626771_CTGAAGTAGACTGTAA-1  | GSM4626771 | OA |
| GSM4626771_CTGAAGTAGACTTGAA-1  | GSM4626771 | OA |
| GSM4626771_CTGAAGTAGACTTTTCG-1 | GSM4626771 | OA |
| GSM4626771_CTGAAGTAGATCGATA-1  | GSM4626771 | OA |

|                                 |            |    |
|---------------------------------|------------|----|
| GSM4626771_CTGAAGTCAGGAACGT-1   | GSM4626771 | OA |
| GSM4626771_CTGAAGTGTCCGAGTC-1   | GSM4626771 | OA |
| GSM4626771_CTGAAGTTCCTATGTT-1   | GSM4626771 | OA |
| GSM4626771_CTGATAGAGGAGTACC-1   | GSM4626771 | OA |
| GSM4626771_CTGATAGCAGGATCGA-1   | GSM4626771 | OA |
| GSM4626771_CTGATAGCATAACCATG-1  | GSM4626771 | OA |
| GSM4626771_CTGATAGGTAGAAGGA-1   | GSM4626771 | OA |
| GSM4626771_CTGATAGGTAGAGCTG-1   | GSM4626771 | OA |
| GSM4626771_CTGATAGGTGTGGTTT-1   | GSM4626771 | OA |
| GSM4626771_CTGATAGTCAGTCAGT-1   | GSM4626771 | OA |
| GSM4626771_CTGATAGTCGAGAACG-1   | GSM4626771 | OA |
| GSM4626771_CTGATCCAGCCTTGAT-1   | GSM4626771 | OA |
| GSM4626771_CTGATCCCACCATGTA-1   | GSM4626771 | OA |
| GSM4626771_CTGATCCCACGACGAA-1   | GSM4626771 | OA |
| GSM4626771_CTGATCCCCTACTACAGT-1 | GSM4626771 | OA |
| GSM4626771_CTGATCCGTCCATGAT-1   | GSM4626771 | OA |
| GSM4626771_CTGATCCGTGAGGGAG-1   | GSM4626771 | OA |
| GSM4626771_CTGATCCGTGCAGTAG-1   | GSM4626771 | OA |
| GSM4626771_CTGATCCGTGTGACGA-1   | GSM4626771 | OA |
| GSM4626771_CTGATCCGTTACGTCA-1   | GSM4626771 | OA |
| GSM4626771_CTGATCCGTTGATTTCG-1  | GSM4626771 | OA |
| GSM4626771_CTGATCCGTTTCCACC-1   | GSM4626771 | OA |
| GSM4626771_CTGATCCTCTCACATT-1   | GSM4626771 | OA |
| GSM4626771_CTGCCTAAGAAGGCCT-1   | GSM4626771 | OA |
| GSM4626771_CTGCCTAAGTAGTGCG-1   | GSM4626771 | OA |
| GSM4626771_CTGCCTACAATCCGAT-1   | GSM4626771 | OA |
| GSM4626771_CTGCCTACATCTACGA-1   | GSM4626771 | OA |
| GSM4626771_CTGCCTAGTGCAACGA-1   | GSM4626771 | OA |
| GSM4626771_CTGCCTAGTTTACTCT-1   | GSM4626771 | OA |
| GSM4626771_CTGCCTATCCAAATGC-1   | GSM4626771 | OA |
| GSM4626771_CTGCCTATCCACGAAT-1   | GSM4626771 | OA |
| GSM4626771_CTGCCTATCCTTAATC-1   | GSM4626771 | OA |
| GSM4626771_CTGCCTATCTGCGTAA-1   | GSM4626771 | OA |
| GSM4626771_CTGCGGAAGAATGTGT-1   | GSM4626771 | OA |
| GSM4626771_CTGCGGAAGATATGGT-1   | GSM4626771 | OA |
| GSM4626771_CTGCGGAAGCCCGAAA-1   | GSM4626771 | OA |
| GSM4626771_CTGCGGAAGCGATGAC-1   | GSM4626771 | OA |
| GSM4626771_CTGCGGAAGTAGGTGC-1   | GSM4626771 | OA |
| GSM4626771_CTGCGGACACGAAAGC-1   | GSM4626771 | OA |
| GSM4626771_CTGCGGACAGACAAAT-1   | GSM4626771 | OA |
| GSM4626771_CTGCGGACAGCTCGAC-1   | GSM4626771 | OA |
| GSM4626771_CTGCGGACATGGGACA-1   | GSM4626771 | OA |
| GSM4626771_CTGCGGAGTCCGAAGA-1   | GSM4626771 | OA |
| GSM4626771_CTGCGGATCAACGGGA-1   | GSM4626771 | OA |
| GSM4626771_CTGCGGATCAAGGCTT-1   | GSM4626771 | OA |
| GSM4626771_CTGCGGATCAGGATCT-1   | GSM4626771 | OA |
| GSM4626771_CTGCTGTAGCGTTGCC-1   | GSM4626771 | OA |
| GSM4626771_CTGCTGTAGGATTCGG-1   | GSM4626771 | OA |
| GSM4626771_CTGCTGTAGGCATGGT-1   | GSM4626771 | OA |
| GSM4626771_CTGCTGTAGGCCCTCA-1   | GSM4626771 | OA |
| GSM4626771_CTGCTGTAGTCGTTTTG-1  | GSM4626771 | OA |
| GSM4626771_CTGCTGTACAGACAG-1    | GSM4626771 | OA |
| GSM4626771_CTGCTGTCACCAGATT-1   | GSM4626771 | OA |
| GSM4626771_CTGCTGTCACCGAATT-1   | GSM4626771 | OA |
| GSM4626771_CTGCTGTCAGCGTCCA-1   | GSM4626771 | OA |
| GSM4626771_CTGCTGTCAGTGGAGT-1   | GSM4626771 | OA |
| GSM4626771_CTGCTGTCAGTTCCT-1    | GSM4626771 | OA |

|                                |            |    |
|--------------------------------|------------|----|
| GSM4626771_CTGCTGTGTAGAGGAA-1  | GSM4626771 | OA |
| GSM4626771_CTGCTGTTCCACGTTTC-1 | GSM4626771 | OA |
| GSM4626771_CTGCTGTTCTCCAACC-1  | GSM4626771 | OA |
| GSM4626771_CTGCTGTTCTTGCATT-1  | GSM4626771 | OA |
| GSM4626771_CTGGTCTAGCTAGCCC-1  | GSM4626771 | OA |
| GSM4626771_CTGGTCTAGCTGATAA-1  | GSM4626771 | OA |
| GSM4626771_CTGGTCTAGTACATGA-1  | GSM4626771 | OA |
| GSM4626771_CTGGTCTAGTAGTGC-1   | GSM4626771 | OA |
| GSM4626771_CTGGTCTAGTGTGAAT-1  | GSM4626771 | OA |
| GSM4626771_CTGGTCTCAAAGGTGC-1  | GSM4626771 | OA |
| GSM4626771_CTGGTCTCAAGCGTAG-1  | GSM4626771 | OA |
| GSM4626771_CTGGTCTCATCAGTAC-1  | GSM4626771 | OA |
| GSM4626771_CTGGTCTGTGCACTTA-1  | GSM4626771 | OA |
| GSM4626771_CTGGTCTTCCCTAACC-1  | GSM4626771 | OA |
| GSM4626771_CTGGTCTTCGAACTGT-1  | GSM4626771 | OA |
| GSM4626771_CTGGTCTTCGCTGATA-1  | GSM4626771 | OA |
| GSM4626771_CTGTGCTAGCAGACTG-1  | GSM4626771 | OA |
| GSM4626771_CTGTGCTAGCGCTCCA-1  | GSM4626771 | OA |
| GSM4626771_CTGTGCTAGCGGCTTC-1  | GSM4626771 | OA |
| GSM4626771_CTGTGCTAGTAATCCC-1  | GSM4626771 | OA |
| GSM4626771_CTGTGCTAGTTGAGTA-1  | GSM4626771 | OA |
| GSM4626771_CTGTGCTCAATGGAGC-1  | GSM4626771 | OA |
| GSM4626771_CTGTGCTCAGATAATG-1  | GSM4626771 | OA |
| GSM4626771_CTGTGCTGTAAATGTG-1  | GSM4626771 | OA |
| GSM4626771_CTGTGCTGTATGAATG-1  | GSM4626771 | OA |
| GSM4626771_CTGTGCTGTGCTGTAT-1  | GSM4626771 | OA |
| GSM4626771_CTGTGCTGTTCGGGCT-1  | GSM4626771 | OA |
| GSM4626771_CTGTGCTTCGTCACGG-1  | GSM4626771 | OA |
| GSM4626771_CTGTGCTTCTGCAAGT-1  | GSM4626771 | OA |
| GSM4626771_CTGTTTAAGACAGAGA-1  | GSM4626771 | OA |
| GSM4626771_CTGTTTAAGCACACAG-1  | GSM4626771 | OA |
| GSM4626771_CTGTTTAAGCCACGTC-1  | GSM4626771 | OA |
| GSM4626771_CTGTTTAAGCCCAGCT-1  | GSM4626771 | OA |
| GSM4626771_CTGTTTAAGCGTTTAC-1  | GSM4626771 | OA |
| GSM4626771_CTGTTTAAGCTACCTA-1  | GSM4626771 | OA |
| GSM4626771_CTGTTTAAGTCAAGGC-1  | GSM4626771 | OA |
| GSM4626771_CTGTTTACAAGGGTCA-1  | GSM4626771 | OA |
| GSM4626771_CTGTTTACAGCCTTTC-1  | GSM4626771 | OA |
| GSM4626771_CTGTTTACAGCTGCAC-1  | GSM4626771 | OA |
| GSM4626771_CTGTTTAGTACCGGCT-1  | GSM4626771 | OA |
| GSM4626771_CTGTTTAGTGAGTGAC-1  | GSM4626771 | OA |
| GSM4626771_CTGTTTAGTTAAAGAC-1  | GSM4626771 | OA |
| GSM4626771_CTGTTTATCCAGAAGG-1  | GSM4626771 | OA |
| GSM4626771_CTGTTTATCCCTAACC-1  | GSM4626771 | OA |
| GSM4626771_CTGTTTATCCGCAGTG-1  | GSM4626771 | OA |
| GSM4626771_CTGTTTATCGCGTAGC-1  | GSM4626771 | OA |
| GSM4626771_CTTAACTCACGTGAGA-1  | GSM4626771 | OA |
| GSM4626771_CTTAACTCATTAGCCA-1  | GSM4626771 | OA |
| GSM4626771_CTTAACTGTGGTCCGT-1  | GSM4626771 | OA |
| GSM4626771_CTTAACTGTTTGTGG-1   | GSM4626771 | OA |
| GSM4626771_CTTAACTTCAACCATG-1  | GSM4626771 | OA |
| GSM4626771_CTTAACTTCATGCATG-1  | GSM4626771 | OA |
| GSM4626771_CTTAACTTCCAAATGC-1  | GSM4626771 | OA |
| GSM4626771_CTTAACTTCTGTACGA-1  | GSM4626771 | OA |
| GSM4626771_CTTACCGAGCATGGCA-1  | GSM4626771 | OA |
| GSM4626771_CTTACCGAGTCGATAA-1  | GSM4626771 | OA |
| GSM4626771_CTTACCGAGTCGCCGT-1  | GSM4626771 | OA |

|                                 |            |    |
|---------------------------------|------------|----|
| GSM4626771_CTTACCGCAGCAGTTT-1   | GSM4626771 | OA |
| GSM4626771_CTTACCGGTACGAAAT-1   | GSM4626771 | OA |
| GSM4626771_CTTACCGGTTCTCATT-1   | GSM4626771 | OA |
| GSM4626771_CTTACCGTCAACACTG-1   | GSM4626771 | OA |
| GSM4626771_CTTACCGTCAAGGTAA-1   | GSM4626771 | OA |
| GSM4626771_CTTACCGTCACCCGAG-1   | GSM4626771 | OA |
| GSM4626771_CTTACCGTCATAAAGG-1   | GSM4626771 | OA |
| GSM4626771_CTTAGGAAGATAGGAG-1   | GSM4626771 | OA |
| GSM4626771_CTTAGGAAGGCCATAG-1   | GSM4626771 | OA |
| GSM4626771_CTTAGGACAGACGTAG-1   | GSM4626771 | OA |
| GSM4626771_CTTAGGAGTAAAGGAG-1   | GSM4626771 | OA |
| GSM4626771_CTTAGGAGTACATGTC-1   | GSM4626771 | OA |
| GSM4626771_CTTAGGAGTCATTAGC-1   | GSM4626771 | OA |
| GSM4626771_CTTAGGAGTTTAGGAA-1   | GSM4626771 | OA |
| GSM4626771_CTTAGGATCAATACCG-1   | GSM4626771 | OA |
| GSM4626771_CTTAGGATCGCCCTTA-1   | GSM4626771 | OA |
| GSM4626771_CTTAGGATCTGTCAAG-1   | GSM4626771 | OA |
| GSM4626771_CTTCTCTAGCAATATG-1   | GSM4626771 | OA |
| GSM4626771_CTTCTCTAGCACCGCT-1   | GSM4626771 | OA |
| GSM4626771_CTTCTCTAGTTGTCGT-1   | GSM4626771 | OA |
| GSM4626771_CTTCTCTCAGATCGGA-1   | GSM4626771 | OA |
| GSM4626771_CTTCTCTCAGGAACGT-1   | GSM4626771 | OA |
| GSM4626771_CTTCTCTCATAACCTG-1   | GSM4626771 | OA |
| GSM4626771_CTTCTCTGTCTGACTGC-1  | GSM4626771 | OA |
| GSM4626771_CTTCTCTGTCTGGGTCT-1  | GSM4626771 | OA |
| GSM4626771_CTTCTCTGTCTAGAGG-1   | GSM4626771 | OA |
| GSM4626771_CTTCTCTGTGATGCC-1    | GSM4626771 | OA |
| GSM4626771_CTTCTCTGTTCCACAA-1   | GSM4626771 | OA |
| GSM4626771_CTTCTCTTCTAACTCT-1   | GSM4626771 | OA |
| GSM4626771_CTTGGCTAGCTAGTTC-1   | GSM4626771 | OA |
| GSM4626771_CTTGGCTAGCTCCCAG-1   | GSM4626771 | OA |
| GSM4626771_CTTGGCTAGGGTGTGT-1   | GSM4626771 | OA |
| GSM4626771_CTTGGCTAGGGTTCCC-1   | GSM4626771 | OA |
| GSM4626771_CTTGGCTAGTACTTGC-1   | GSM4626771 | OA |
| GSM4626771_CTTGGCTAGTTACCCA-1   | GSM4626771 | OA |
| GSM4626771_CTTGGCTCAAATTGCC-1   | GSM4626771 | OA |
| GSM4626771_CTTGGCTCAACGATGG-1   | GSM4626771 | OA |
| GSM4626771_CTTGGCTCACACCAG-1    | GSM4626771 | OA |
| GSM4626771_CTTGGCTCAGTCTTCC-1   | GSM4626771 | OA |
| GSM4626771_CTTGGCTGTACCGTTA-1   | GSM4626771 | OA |
| GSM4626771_CTTGGCTGTTCAGCGC-1   | GSM4626771 | OA |
| GSM4626771_CTTGGCTGTTGGACCC-1   | GSM4626771 | OA |
| GSM4626771_CTTGGCTTTCAGTTAGC-1  | GSM4626771 | OA |
| GSM4626771_CTTGGCTTTCATCTGCC-1  | GSM4626771 | OA |
| GSM4626771_CTTGGCTTCGAGAGCA-1   | GSM4626771 | OA |
| GSM4626771_CTTGGCTTCTCAACTT-1   | GSM4626771 | OA |
| GSM4626771_CTTTGCAGCTAGGCA-1    | GSM4626771 | OA |
| GSM4626771_CTTTGCACAAATTGCC-1   | GSM4626771 | OA |
| GSM4626771_CTTTGCACACAACGCC-1   | GSM4626771 | OA |
| GSM4626771_CTTTGCACACAGGCCT-1   | GSM4626771 | OA |
| GSM4626771_CTTTGCACATACTCTT-1   | GSM4626771 | OA |
| GSM4626771_CTTTGCAGGTAGTACCT-1  | GSM4626771 | OA |
| GSM4626771_CTTTGCAGGTACCTAA-1   | GSM4626771 | OA |
| GSM4626771_CTTTGCAGGTACAGTGA-1  | GSM4626771 | OA |
| GSM4626771_CTTTGCAGGTCCCTAGCG-1 | GSM4626771 | OA |
| GSM4626771_CTTTGCAGGTCCGCTTCT-1 | GSM4626771 | OA |
| GSM4626771_CTTTGCAGTCAACAGT-1   | GSM4626771 | OA |

|                                |            |    |
|--------------------------------|------------|----|
| GSM4626771_CTTTGCCTCTCATTCA-1  | GSM4626771 | OA |
| GSM4626771_CTTTGCCTCTTGAGGT-1  | GSM4626771 | OA |
| GSM4626771_GAAACTCAGACGACGT-1  | GSM4626771 | OA |
| GSM4626771_GAAACTCGTATCAGTC-1  | GSM4626771 | OA |
| GSM4626771_GAAACTCGTTGGTTTG-1  | GSM4626771 | OA |
| GSM4626771_GAAACTCTCAGTGCAT-1  | GSM4626771 | OA |
| GSM4626771_GAAACTCTCCACGTTT-1  | GSM4626771 | OA |
| GSM4626771_GAAACTCTCGAGCCCA-1  | GSM4626771 | OA |
| GSM4626771_GAAATGAAGAAGGCCT-1  | GSM4626771 | OA |
| GSM4626771_GAAATGACACTTCGAA-1  | GSM4626771 | OA |
| GSM4626771_GAAATGACATGGATGG-1  | GSM4626771 | OA |
| GSM4626771_GAAATGAGTACTCGCG-1  | GSM4626771 | OA |
| GSM4626771_GAAATGAGTACTCTCC-1  | GSM4626771 | OA |
| GSM4626771_GAAATGAGTGGTCTCG-1  | GSM4626771 | OA |
| GSM4626771_GAAATGATCAACGAAA-1  | GSM4626771 | OA |
| GSM4626771_GAAATGATCAAGGTAA-1  | GSM4626771 | OA |
| GSM4626771_GAAATGATCTTCGAGA-1  | GSM4626771 | OA |
| GSM4626771_GAACATCAGCCAACAG-1  | GSM4626771 | OA |
| GSM4626771_GAACATCAGTTTCGCAT-1 | GSM4626771 | OA |
| GSM4626771_GAACATCCAACACCCG-1  | GSM4626771 | OA |
| GSM4626771_GAACATCCAGACAGGT-1  | GSM4626771 | OA |
| GSM4626771_GAACATCCATCGGACC-1  | GSM4626771 | OA |
| GSM4626771_GAACATCGTACGAAAT-1  | GSM4626771 | OA |
| GSM4626771_GAACATCGTGCAACTT-1  | GSM4626771 | OA |
| GSM4626771_GAACATCGTGCCCTGTG-1 | GSM4626771 | OA |
| GSM4626771_GAACATCGTGCTTCTC-1  | GSM4626771 | OA |
| GSM4626771_GAACATCGTTATTCTC-1  | GSM4626771 | OA |
| GSM4626771_GAACATCGTTTGTTTC-1  | GSM4626771 | OA |
| GSM4626771_GAACATCTCGTGGGAA-1  | GSM4626771 | OA |
| GSM4626771_GAACCTAAGCTCCCAG-1  | GSM4626771 | OA |
| GSM4626771_GAACCTAAGGCAAAGA-1  | GSM4626771 | OA |
| GSM4626771_GAACCTAAGTTGCAGG-1  | GSM4626771 | OA |
| GSM4626771_GAACCTACAGACAAGC-1  | GSM4626771 | OA |
| GSM4626771_GAACCTACAGTGACAG-1  | GSM4626771 | OA |
| GSM4626771_GAACCTAGTACATCCA-1  | GSM4626771 | OA |
| GSM4626771_GAACCTAGTATCACCA-1  | GSM4626771 | OA |
| GSM4626771_GAACCTAGTGACGCCT-1  | GSM4626771 | OA |
| GSM4626771_GAACCTATCTATGTGG-1  | GSM4626771 | OA |
| GSM4626771_GAACGGAAGACATAAC-1  | GSM4626771 | OA |
| GSM4626771_GAACGGAAGATAGCAT-1  | GSM4626771 | OA |
| GSM4626771_GAACGGAAGCTCTCGG-1  | GSM4626771 | OA |
| GSM4626771_GAACGGAAGTTTAGGA-1  | GSM4626771 | OA |
| GSM4626771_GAACGGACACGTCTCT-1  | GSM4626771 | OA |
| GSM4626771_GAACGGACATGGGAAC-1  | GSM4626771 | OA |
| GSM4626771_GAACGGAGTTCTCATT-1  | GSM4626771 | OA |
| GSM4626771_GAACGGAGTTGTTTGG-1  | GSM4626771 | OA |
| GSM4626771_GAACGGATCGCAAAC-1   | GSM4626771 | OA |
| GSM4626771_GAACGGATCGTGACAT-1  | GSM4626771 | OA |
| GSM4626771_GAACGGATCGTTGACA-1  | GSM4626771 | OA |
| GSM4626771_GAACGGATCTTCGGTC-1  | GSM4626771 | OA |
| GSM4626771_GAAGCAGAGCCGCCTA-1  | GSM4626771 | OA |
| GSM4626771_GAAGCAGCAAGCGTAG-1  | GSM4626771 | OA |
| GSM4626771_GAAGCAGCACCTCGTT-1  | GSM4626771 | OA |
| GSM4626771_GAAGCAGCATATGAGA-1  | GSM4626771 | OA |
| GSM4626771_GAAGCAGGTGGCGAAT-1  | GSM4626771 | OA |
| GSM4626771_GAATAAGAGAAACCGC-1  | GSM4626771 | OA |
| GSM4626771_GAATAAGAGTATTGGA-1  | GSM4626771 | OA |

|                                |            |    |
|--------------------------------|------------|----|
| GSM4626771_GAATAAGCAAGGACAC-1  | GSM4626771 | OA |
| GSM4626771_GAATAAGCAGGCTCAC-1  | GSM4626771 | OA |
| GSM4626771_GAATAAGGTCATATCG-1  | GSM4626771 | OA |
| GSM4626771_GAATAAGGTTCAACCA-1  | GSM4626771 | OA |
| GSM4626771_GAATAAGTCAATAAGG-1  | GSM4626771 | OA |
| GSM4626771_GAATAAGTCCAATGGT-1  | GSM4626771 | OA |
| GSM4626771_GAATAAGTCGAATGCT-1  | GSM4626771 | OA |
| GSM4626771_GAATAAGTCGTAGGAG-1  | GSM4626771 | OA |
| GSM4626771_GAATAAGTCTAACTCT-1  | GSM4626771 | OA |
| GSM4626771_GAATGAAAGCCACGTC-1  | GSM4626771 | OA |
| GSM4626771_GAATGAAAGCCAGTTT-1  | GSM4626771 | OA |
| GSM4626771_GAATGAAAGCGTGAGT-1  | GSM4626771 | OA |
| GSM4626771_GAATGAAAGCGTGTCC-1  | GSM4626771 | OA |
| GSM4626771_GAATGAAAGCTCCTTC-1  | GSM4626771 | OA |
| GSM4626771_GAATGAAAGGCCCTTG-1  | GSM4626771 | OA |
| GSM4626771_GAATGAAAGGTGACCA-1  | GSM4626771 | OA |
| GSM4626771_GAATGAAAGTACGACG-1  | GSM4626771 | OA |
| GSM4626771_GAATGAAAGTGCCAGA-1  | GSM4626771 | OA |
| GSM4626771_GAATGAACAAGTTCTG-1  | GSM4626771 | OA |
| GSM4626771_GAATGAACAGTTTACG-1  | GSM4626771 | OA |
| GSM4626771_GAATGAACATCACAAAC-1 | GSM4626771 | OA |
| GSM4626771_GAATGAACATTTGCTT-1  | GSM4626771 | OA |
| GSM4626771_GAATGAAGTCTTGCGG-1  | GSM4626771 | OA |
| GSM4626771_GAATGAAGTGTGCGTC-1  | GSM4626771 | OA |
| GSM4626771_GAATGAAGTTGTACAC-1  | GSM4626771 | OA |
| GSM4626771_GAATGAATCAGGCAAG-1  | GSM4626771 | OA |
| GSM4626771_GAATGAATCCTTCAAT-1  | GSM4626771 | OA |
| GSM4626771_GAATGAATCTCGTATT-1  | GSM4626771 | OA |
| GSM4626771_GACACGCAGATGTTAG-1  | GSM4626771 | OA |
| GSM4626771_GACACGCAGCTCCTCT-1  | GSM4626771 | OA |
| GSM4626771_GACACGCAGGCGTACA-1  | GSM4626771 | OA |
| GSM4626771_GACACGCCAAGACGTG-1  | GSM4626771 | OA |
| GSM4626771_GACACGCTCAGTGCAT-1  | GSM4626771 | OA |
| GSM4626771_GACACGCTCCACTCCA-1  | GSM4626771 | OA |
| GSM4626771_GACACGCTCCTGCCAT-1  | GSM4626771 | OA |
| GSM4626771_GACACGCTCGTAGGTT-1  | GSM4626771 | OA |
| GSM4626771_GACAGAGAGAAGGGTA-1  | GSM4626771 | OA |
| GSM4626771_GACAGAGAGTCAATAG-1  | GSM4626771 | OA |
| GSM4626771_GACAGAGCATACGCCG-1  | GSM4626771 | OA |
| GSM4626771_GACAGAGCATGCAATC-1  | GSM4626771 | OA |
| GSM4626771_GACAGAGGTAACGCGA-1  | GSM4626771 | OA |
| GSM4626771_GACAGAGGTAACGCGA-1  | GSM4626771 | OA |
| GSM4626771_GACAGAGGTACTCAAC-1  | GSM4626771 | OA |
| GSM4626771_GACAGAGGTCACAAGG-1  | GSM4626771 | OA |
| GSM4626771_GACAGAGGTGAAATCA-1  | GSM4626771 | OA |
| GSM4626771_GACCAATAGGGAACGG-1  | GSM4626771 | OA |
| GSM4626771_GACCAATAGTTAGGTA-1  | GSM4626771 | OA |
| GSM4626771_GACCAATCAATAAGCA-1  | GSM4626771 | OA |
| GSM4626771_GACCAATCATTATCTC-1  | GSM4626771 | OA |
| GSM4626771_GACCAATGTTTGACTG-1  | GSM4626771 | OA |
| GSM4626771_GACCAATTCACCAGGC-1  | GSM4626771 | OA |
| GSM4626771_GACCAATTCTAACTCT-1  | GSM4626771 | OA |
| GSM4626771_GACCTGGAGCTAGTCT-1  | GSM4626771 | OA |
| GSM4626771_GACCTGGAGTCGCCGT-1  | GSM4626771 | OA |
| GSM4626771_GACCTGGGTCCGAATT-1  | GSM4626771 | OA |
| GSM4626771_GACCTGGGTCTCTTC-1   | GSM4626771 | OA |
| GSM4626771_GACCTGGTCACTGTT-1   | GSM4626771 | OA |
| GSM4626771_GACCTGGTCCAAACAC-1  | GSM4626771 | OA |

|                                |            |    |
|--------------------------------|------------|----|
| GSM4626771_GACCTGGTCTGATACG-1  | GSM4626771 | OA |
| GSM4626771_GACGCGTAGTTCGCAT-1  | GSM4626771 | OA |
| GSM4626771_GACGCGTCAAGGCTCC-1  | GSM4626771 | OA |
| GSM4626771_GACGCGTCAATAGAGT-1  | GSM4626771 | OA |
| GSM4626771_GACGCGTCAATCTACG-1  | GSM4626771 | OA |
| GSM4626771_GACGCGTCACGGTGTC-1  | GSM4626771 | OA |
| GSM4626771_GACGCGTCAGCCAATT-1  | GSM4626771 | OA |
| GSM4626771_GACGCGTCATGTTCCC-1  | GSM4626771 | OA |
| GSM4626771_GACGCGTGTAAGTTCC-1  | GSM4626771 | OA |
| GSM4626771_GACGCGTGTTGTGGCC-1  | GSM4626771 | OA |
| GSM4626771_GACGCGTTCAGTCCCT-1  | GSM4626771 | OA |
| GSM4626771_GACGCGTTCCTGCAGG-1  | GSM4626771 | OA |
| GSM4626771_GACGCGTTCCTGCTGCT-1 | GSM4626771 | OA |
| GSM4626771_GACGGCTAGACAAAGG-1  | GSM4626771 | OA |
| GSM4626771_GACGGCTAGTGCCATT-1  | GSM4626771 | OA |
| GSM4626771_GACGGCTAGTGGTCCC-1  | GSM4626771 | OA |
| GSM4626771_GACGGCTCAAAGGCGT-1  | GSM4626771 | OA |
| GSM4626771_GACGGCTCAGGTCCAC-1  | GSM4626771 | OA |
| GSM4626771_GACGGCTCAGTACACT-1  | GSM4626771 | OA |
| GSM4626771_GACGGCTGTCAAGCGA-1  | GSM4626771 | OA |
| GSM4626771_GACGGCTGTCTGGTCG-1  | GSM4626771 | OA |
| GSM4626771_GACGGCTTCAATAAGG-1  | GSM4626771 | OA |
| GSM4626771_GACGGCTTCAGGCAAG-1  | GSM4626771 | OA |
| GSM4626771_GACGGCTTCCGTAGTA-1  | GSM4626771 | OA |
| GSM4626771_GACGGCTTCCTTAATC-1  | GSM4626771 | OA |
| GSM4626771_GACGGCTTCGTCTGCT-1  | GSM4626771 | OA |
| GSM4626771_GACGGCTTCTAAGCCA-1  | GSM4626771 | OA |
| GSM4626771_GACGGCTTCTTGCAAG-1  | GSM4626771 | OA |
| GSM4626771_GACGTGCAGCCGTCGT-1  | GSM4626771 | OA |
| GSM4626771_GACGTGCCACGGTAGA-1  | GSM4626771 | OA |
| GSM4626771_GACGTGCCAGAGCCAA-1  | GSM4626771 | OA |
| GSM4626771_GACGTGCCATGGATGG-1  | GSM4626771 | OA |
| GSM4626771_GACGTGCGTCACACGC-1  | GSM4626771 | OA |
| GSM4626771_GACGTGCGTCGTTCT-1   | GSM4626771 | OA |
| GSM4626771_GACGTGCTCGCCTGTT-1  | GSM4626771 | OA |
| GSM4626771_GACGTGCTCTCCTATA-1  | GSM4626771 | OA |
| GSM4626771_GACGTGCTCTCTGAGA-1  | GSM4626771 | OA |
| GSM4626771_GACGTTAAGAACAAC-1   | GSM4626771 | OA |
| GSM4626771_GACGTTAAGACCACGA-1  | GSM4626771 | OA |
| GSM4626771_GACGTTAAGCAATATG-1  | GSM4626771 | OA |
| GSM4626771_GACGTTAAGCTGCGAA-1  | GSM4626771 | OA |
| GSM4626771_GACGTTAAGTCGTTTG-1  | GSM4626771 | OA |
| GSM4626771_GACGTTACAGTTTCA-1   | GSM4626771 | OA |
| GSM4626771_GACGTTAGTCAACTGT-1  | GSM4626771 | OA |
| GSM4626771_GACGTTAGTGTGCGTC-1  | GSM4626771 | OA |
| GSM4626771_GACGTTAGTTGATTGC-1  | GSM4626771 | OA |
| GSM4626771_GACGTATCTACTTAC-1   | GSM4626771 | OA |
| GSM4626771_GACTAACAGATCTGCT-1  | GSM4626771 | OA |
| GSM4626771_GACTAACCAATGCCAT-1  | GSM4626771 | OA |
| GSM4626771_GACTAACGTTGTGGAG-1  | GSM4626771 | OA |
| GSM4626771_GACTAACTCCAGATCA-1  | GSM4626771 | OA |
| GSM4626771_GACTAACTCGCCTGTT-1  | GSM4626771 | OA |
| GSM4626771_GACTACAAGTGACATA-1  | GSM4626771 | OA |
| GSM4626771_GACTACACAAACTGTC-1  | GSM4626771 | OA |
| GSM4626771_GACTACACAGACGCCT-1  | GSM4626771 | OA |
| GSM4626771_GACTACACATAGGATA-1  | GSM4626771 | OA |
| GSM4626771_GACTACAGTCTTTCAT-1  | GSM4626771 | OA |

|                                |            |    |
|--------------------------------|------------|----|
| GSM4626771_GACTACAGTGTAATGA-1  | GSM4626771 | OA |
| GSM4626771_GACTACATCGCCGTGA-1  | GSM4626771 | OA |
| GSM4626771_GACTACATCTGGTTCC-1  | GSM4626771 | OA |
| GSM4626771_GACTACATCTTTACGT-1  | GSM4626771 | OA |
| GSM4626771_GACTACATCTTTCCTC-1  | GSM4626771 | OA |
| GSM4626771_GACTGCGCAAGTCTAC-1  | GSM4626771 | OA |
| GSM4626771_GACTGCGCACTTAAGC-1  | GSM4626771 | OA |
| GSM4626771_GACTGCGCATCACAAAC-1 | GSM4626771 | OA |
| GSM4626771_GACTGCGCATCACGAT-1  | GSM4626771 | OA |
| GSM4626771_GACTGCGGTCCAAGTT-1  | GSM4626771 | OA |
| GSM4626771_GACTGCGGTCTAGAGG-1  | GSM4626771 | OA |
| GSM4626771_GACTGCGGTGTAATGA-1  | GSM4626771 | OA |
| GSM4626771_GACTGCGTCCAGAAAGG-1 | GSM4626771 | OA |
| GSM4626771_GACTGCGTCCATGTCTT-1 | GSM4626771 | OA |
| GSM4626771_GAGCAGAAGAACTGTA-1  | GSM4626771 | OA |
| GSM4626771_GAGCAGAAGAATAGGG-1  | GSM4626771 | OA |
| GSM4626771_GAGCAGAAGGAGTAGA-1  | GSM4626771 | OA |
| GSM4626771_GAGCAGAAGGCATTGG-1  | GSM4626771 | OA |
| GSM4626771_GAGCAGACAAGTTTTC-1  | GSM4626771 | OA |
| GSM4626771_GAGCAGACAAGTCATC-1  | GSM4626771 | OA |
| GSM4626771_GAGCAGACACGTGAGA-1  | GSM4626771 | OA |
| GSM4626771_GAGCAGACACGTTGGC-1  | GSM4626771 | OA |
| GSM4626771_GAGCAGACAGTTTACG-1  | GSM4626771 | OA |
| GSM4626771_GAGCAGACATCCGTGG-1  | GSM4626771 | OA |
| GSM4626771_GAGCAGACATCTCGCT-1  | GSM4626771 | OA |
| GSM4626771_GAGCAGAGTATAGTAG-1  | GSM4626771 | OA |
| GSM4626771_GAGCAGAGTCGAATCT-1  | GSM4626771 | OA |
| GSM4626771_GAGCAGAGTGTAATGA-1  | GSM4626771 | OA |
| GSM4626771_GAGCAGATCATGTCTT-1  | GSM4626771 | OA |
| GSM4626771_GAGCAGATCCGGGTGT-1  | GSM4626771 | OA |
| GSM4626771_GAGGTGAAGGATGCGT-1  | GSM4626771 | OA |
| GSM4626771_GAGGTGAAGTGTACTC-1  | GSM4626771 | OA |
| GSM4626771_GAGGTGACAAGCTGAG-1  | GSM4626771 | OA |
| GSM4626771_GAGGTGACAAGGTGTG-1  | GSM4626771 | OA |
| GSM4626771_GAGGTGACACATGACT-1  | GSM4626771 | OA |
| GSM4626771_GAGGTGACACGAAACG-1  | GSM4626771 | OA |
| GSM4626771_GAGGTGACAGTATCTG-1  | GSM4626771 | OA |
| GSM4626771_GAGGTGATCACTTATC-1  | GSM4626771 | OA |
| GSM4626771_GAGGTGATCAGCACAT-1  | GSM4626771 | OA |
| GSM4626771_GAGGTGATCGTCCGTT-1  | GSM4626771 | OA |
| GSM4626771_GAGGTGATCTTTCCTC-1  | GSM4626771 | OA |
| GSM4626771_GAGTCCGAGCCGATTT-1  | GSM4626771 | OA |
| GSM4626771_GAGTCCGAGCGCCTTG-1  | GSM4626771 | OA |
| GSM4626771_GAGTCCGAGCTAGTTC-1  | GSM4626771 | OA |
| GSM4626771_GAGTCCGCATAGAAAC-1  | GSM4626771 | OA |
| GSM4626771_GAGTCCGCATCTATGG-1  | GSM4626771 | OA |
| GSM4626771_GAGTCCGCATTCACCTT-1 | GSM4626771 | OA |
| GSM4626771_GAGTCCGGTGAAGGCT-1  | GSM4626771 | OA |
| GSM4626771_GAGTCCGGTTCGCGAC-1  | GSM4626771 | OA |
| GSM4626771_GAGTCCGTCCCTTGGTC-1 | GSM4626771 | OA |
| GSM4626771_GATCAGTAGCTGGAAC-1  | GSM4626771 | OA |
| GSM4626771_GATCAGTAGGATGGAA-1  | GSM4626771 | OA |
| GSM4626771_GATCAGTCAACAACCT-1  | GSM4626771 | OA |
| GSM4626771_GATCAGTCAAGTTCTG-1  | GSM4626771 | OA |
| GSM4626771_GATCAGTCATGCAACT-1  | GSM4626771 | OA |
| GSM4626771_GATCAGTGTTTCGTCTC-1 | GSM4626771 | OA |
| GSM4626771_GATCAGTTCAGCTCGG-1  | GSM4626771 | OA |



|                                |            |    |
|--------------------------------|------------|----|
| GSM4626771_GATCGATAGAATGTTG-1  | GSM4626771 | OA |
| GSM4626771_GATCGATAGGCTAGCA-1  | GSM4626771 | OA |
| GSM4626771_GATCGATCACTCAGGC-1  | GSM4626771 | OA |
| GSM4626771_GATCGATTTCGTAGATC-1 | GSM4626771 | OA |
| GSM4626771_GATCGCGAGACAGACC-1  | GSM4626771 | OA |
| GSM4626771_GATCGCGAGTAGGCCA-1  | GSM4626771 | OA |
| GSM4626771_GATCGCGCAGACTCGC-1  | GSM4626771 | OA |
| GSM4626771_GATCGTAAGAAACCTA-1  | GSM4626771 | OA |
| GSM4626771_GATCGTAAGAAGGTGA-1  | GSM4626771 | OA |
| GSM4626771_GATCGTAAGACTAGGC-1  | GSM4626771 | OA |
| GSM4626771_GATCGTAAGAGACTAT-1  | GSM4626771 | OA |
| GSM4626771_GATCGTAAGCTACCTA-1  | GSM4626771 | OA |
| GSM4626771_GATCGTAAGGTGACCA-1  | GSM4626771 | OA |
| GSM4626771_GATCGTACAGGATTGG-1  | GSM4626771 | OA |
| GSM4626771_GATCGTACATTCTTAC-1  | GSM4626771 | OA |
| GSM4626771_GATCGTAGTAAATACG-1  | GSM4626771 | OA |
| GSM4626771_GATCGTAGTAATAGCA-1  | GSM4626771 | OA |
| GSM4626771_GATCGTAGTTCAGACT-1  | GSM4626771 | OA |
| GSM4626771_GATCGTATCAATCTCT-1  | GSM4626771 | OA |
| GSM4626771_GATCTAGAGCGATGAC-1  | GSM4626771 | OA |
| GSM4626771_GATCTAGCAAGTTAAG-1  | GSM4626771 | OA |
| GSM4626771_GATCTAGCAATACGCT-1  | GSM4626771 | OA |
| GSM4626771_GATCTAGCACGAGGTA-1  | GSM4626771 | OA |
| GSM4626771_GATCTAGCAGGGTACA-1  | GSM4626771 | OA |
| GSM4626771_GATCTAGGTCAGAATA-1  | GSM4626771 | OA |
| GSM4626771_GATCTAGGTGCAACTT-1  | GSM4626771 | OA |
| GSM4626771_GATCTAGTCTCTGCTG-1  | GSM4626771 | OA |
| GSM4626771_GATGAAAAGAGTTGGC-1  | GSM4626771 | OA |
| GSM4626771_GATGAAAAGATTACCC-1  | GSM4626771 | OA |
| GSM4626771_GATGAAAAGCTGAAAT-1  | GSM4626771 | OA |
| GSM4626771_GATGAAAAGGACATTA-1  | GSM4626771 | OA |
| GSM4626771_GATGAAAAGGGTGTTG-1  | GSM4626771 | OA |
| GSM4626771_GATGAAACAAGTTGTC-1  | GSM4626771 | OA |
| GSM4626771_GATGAAACACATGGGA-1  | GSM4626771 | OA |
| GSM4626771_GATGAAACACGGTAGA-1  | GSM4626771 | OA |
| GSM4626771_GATGAAAGTAAACCTC-1  | GSM4626771 | OA |
| GSM4626771_GATGAAAGTACATCCA-1  | GSM4626771 | OA |
| GSM4626771_GATGAAATCATTGCC-1   | GSM4626771 | OA |
| GSM4626771_GATGAGGAGACCACGA-1  | GSM4626771 | OA |
| GSM4626771_GATGAGGAGCTGATAA-1  | GSM4626771 | OA |
| GSM4626771_GATGAGGAGTTTCCTT-1  | GSM4626771 | OA |
| GSM4626771_GATGAGGCAACACCTA-1  | GSM4626771 | OA |
| GSM4626771_GATGAGGCAGGTTTCA-1  | GSM4626771 | OA |
| GSM4626771_GATGAGGCAGTAAGCG-1  | GSM4626771 | OA |
| GSM4626771_GATGAGGGTCGGGTCT-1  | GSM4626771 | OA |
| GSM4626771_GATGAGGGTGGTGTAG-1  | GSM4626771 | OA |
| GSM4626771_GATGAGGGTTGTCGCG-1  | GSM4626771 | OA |
| GSM4626771_GATGAGGTCGTTGCCT-1  | GSM4626771 | OA |
| GSM4626771_GATGCTAAGAGCAATT-1  | GSM4626771 | OA |
| GSM4626771_GATGCTAAGCCCAATT-1  | GSM4626771 | OA |
| GSM4626771_GATGCTAAGTAACCCT-1  | GSM4626771 | OA |
| GSM4626771_GATGCTAAGTCCATAC-1  | GSM4626771 | OA |
| GSM4626771_GATGCTAAGTCGCCGT-1  | GSM4626771 | OA |
| GSM4626771_GATGCTAAGTGGCACA-1  | GSM4626771 | OA |
| GSM4626771_GATGCTACAGAAGCAC-1  | GSM4626771 | OA |
| GSM4626771_GATGCTAGTAAACCTC-1  | GSM4626771 | OA |
| GSM4626771_GATGCTAGTACGAAAT-1  | GSM4626771 | OA |

|                                |            |    |
|--------------------------------|------------|----|
| GSM4626771_GATGCTAGTCCATGAT-1  | GSM4626771 | OA |
| GSM4626771_GATGCTAGTTAAGACA-1  | GSM4626771 | OA |
| GSM4626771_GATGCTATCTGGCGAC-1  | GSM4626771 | OA |
| GSM4626771_GATTCAGCATCTATGG-1  | GSM4626771 | OA |
| GSM4626771_GATTCAGCATGACGGA-1  | GSM4626771 | OA |
| GSM4626771_GATTCAGGTCTAGTCA-1  | GSM4626771 | OA |
| GSM4626771_GATTCAGGTTTGACAC-1  | GSM4626771 | OA |
| GSM4626771_GATTCAGTCAGCAACT-1  | GSM4626771 | OA |
| GSM4626771_GATTCAGTCCGATATG-1  | GSM4626771 | OA |
| GSM4626771_GATTCAGTCGGGAGTA-1  | GSM4626771 | OA |
| GSM4626771_GATTCAGTCGTCCAGG-1  | GSM4626771 | OA |
| GSM4626771_GATTCAGTCGTTACGA-1  | GSM4626771 | OA |
| GSM4626771_GCAAAGTACAT-1       | GSM4626771 | OA |
| GSM4626771_GCAAAGTATCCTGT-1    | GSM4626771 | OA |
| GSM4626771_GCAAAGTGGCTCCA-1    | GSM4626771 | OA |
| GSM4626771_GCAAAGTGGAGGT-1     | GSM4626771 | OA |
| GSM4626771_GCAAAGTTCACGATGT-1  | GSM4626771 | OA |
| GSM4626771_GCAAAGTTCAGTCCCT-1  | GSM4626771 | OA |
| GSM4626771_GCAAAGTTCGGTTGTC-1  | GSM4626771 | OA |
| GSM4626771_GCAAAGTTCCTATA-1    | GSM4626771 | OA |
| GSM4626771_GCAATCAAGAATCCC-1   | GSM4626771 | OA |
| GSM4626771_GCAATCAAGACTGTAA-1  | GSM4626771 | OA |
| GSM4626771_GCAATCAAGCGTTCCG-1  | GSM4626771 | OA |
| GSM4626771_GCAATCAAGGTACTCT-1  | GSM4626771 | OA |
| GSM4626771_GCAATCACAGGGTATG-1  | GSM4626771 | OA |
| GSM4626771_GCAATCACAGTATGCT-1  | GSM4626771 | OA |
| GSM4626771_GCAATCAGTCTAGAGG-1  | GSM4626771 | OA |
| GSM4626771_GCAATCAGTTATCGGT-1  | GSM4626771 | OA |
| GSM4626771_GCAATCATCAGTTAGC-1  | GSM4626771 | OA |
| GSM4626771_GCACATAGTACCAGTT-1  | GSM4626771 | OA |
| GSM4626771_GCACATAGTATGAAAC-1  | GSM4626771 | OA |
| GSM4626771_GCACTCTAGACAAGCC-1  | GSM4626771 | OA |
| GSM4626771_GCACTCTAGCACGCCT-1  | GSM4626771 | OA |
| GSM4626771_GCACTCTCAGGCGATA-1  | GSM4626771 | OA |
| GSM4626771_GCACTCTGTACGCACC-1  | GSM4626771 | OA |
| GSM4626771_GCACTCTGTATCACCA-1  | GSM4626771 | OA |
| GSM4626771_GCACTCTTCAAACCAC-1  | GSM4626771 | OA |
| GSM4626771_GCACTCTTCAATTGCGA-1 | GSM4626771 | OA |
| GSM4626771_GCACTCTTCGCTAGCG-1  | GSM4626771 | OA |
| GSM4626771_GCAGCCAAGCTGAACG-1  | GSM4626771 | OA |
| GSM4626771_GCAGCCAAGTTCGCAT-1  | GSM4626771 | OA |
| GSM4626771_GCAGCCAAGTTGTCGT-1  | GSM4626771 | OA |
| GSM4626771_GCAGCCACAAATACAG-1  | GSM4626771 | OA |
| GSM4626771_GCAGCCACAAGCGATG-1  | GSM4626771 | OA |
| GSM4626771_GCAGCCACAATCACAC-1  | GSM4626771 | OA |
| GSM4626771_GCAGCCACAGTATGCT-1  | GSM4626771 | OA |
| GSM4626771_GCAGCCACATCCAACA-1  | GSM4626771 | OA |
| GSM4626771_GCAGCCACATTGGCGC-1  | GSM4626771 | OA |
| GSM4626771_GCAGCCACATTGGGCC-1  | GSM4626771 | OA |
| GSM4626771_GCAGCCAGTAAGGGAA-1  | GSM4626771 | OA |
| GSM4626771_GCAGCCATCACATAGC-1  | GSM4626771 | OA |
| GSM4626771_GCAGCCATCAGCAACT-1  | GSM4626771 | OA |
| GSM4626771_GCAGCCATCGTACGGC-1  | GSM4626771 | OA |
| GSM4626771_GCAGCCATCTGCTGTC-1  | GSM4626771 | OA |
| GSM4626771_GCAGTTAAGACAGACC-1  | GSM4626771 | OA |
| GSM4626771_GCAGTTAAGAGACGAA-1  | GSM4626771 | OA |
| GSM4626771_GCAGTTAAGCAGCGTA-1  | GSM4626771 | OA |

|                                |            |    |
|--------------------------------|------------|----|
| GSM4626771_GCAGTTAAGCTCAACT-1  | GSM4626771 | OA |
| GSM4626771_GCAGTTAGTCGAGTTT-1  | GSM4626771 | OA |
| GSM4626771_GCAGTTAGTCGCGGTT-1  | GSM4626771 | OA |
| GSM4626771_GCAGTTAGTTATTCTC-1  | GSM4626771 | OA |
| GSM4626771_GCAGTTAGTTGACGTT-1  | GSM4626771 | OA |
| GSM4626771_GCAGTTATCTAGAGTC-1  | GSM4626771 | OA |
| GSM4626771_GCATACAAGATAGGAG-1  | GSM4626771 | OA |
| GSM4626771_GCATACAAGGATATAC-1  | GSM4626771 | OA |
| GSM4626771_GCATACAAGTGAAGAG-1  | GSM4626771 | OA |
| GSM4626771_GCATACACAATGACCT-1  | GSM4626771 | OA |
| GSM4626771_GCATACACAGGAATCG-1  | GSM4626771 | OA |
| GSM4626771_GCATACACATGCTAGT-1  | GSM4626771 | OA |
| GSM4626771_GCATACAGTAAATGAC-1  | GSM4626771 | OA |
| GSM4626771_GCATACAGTCTTCGTC-1  | GSM4626771 | OA |
| GSM4626771_GCATACAGTGTGACGA-1  | GSM4626771 | OA |
| GSM4626771_GCATACAGTTATCGGT-1  | GSM4626771 | OA |
| GSM4626771_GCATACATCACGATGT-1  | GSM4626771 | OA |
| GSM4626771_GCATACATCAGTGCAT-1  | GSM4626771 | OA |
| GSM4626771_GCATACATCCAACTG-1   | GSM4626771 | OA |
| GSM4626771_GCATGATAGCCGATTT-1  | GSM4626771 | OA |
| GSM4626771_GCATGATAGTTACCCA-1  | GSM4626771 | OA |
| GSM4626771_GCATGATCAGACGTAG-1  | GSM4626771 | OA |
| GSM4626771_GCATGATGTACGACCC-1  | GSM4626771 | OA |
| GSM4626771_GCATGATTTCGGTCCGA-1 | GSM4626771 | OA |
| GSM4626771_GCATGATTCTGCGACG-1  | GSM4626771 | OA |
| GSM4626771_GCATGCGAGCAAATCA-1  | GSM4626771 | OA |
| GSM4626771_GCATGCGAGGATGGTC-1  | GSM4626771 | OA |
| GSM4626771_GCATGCGAGTGGGCTA-1  | GSM4626771 | OA |
| GSM4626771_GCATGCGCACAAAGACG-1 | GSM4626771 | OA |
| GSM4626771_GCATGCGCACTAGTAC-1  | GSM4626771 | OA |
| GSM4626771_GCATGCGCAGGCTGAA-1  | GSM4626771 | OA |
| GSM4626771_GCATGCGCATCGATTG-1  | GSM4626771 | OA |
| GSM4626771_GCATGCGGTAGCGTAG-1  | GSM4626771 | OA |
| GSM4626771_GCATGCGGTTACGGC-1   | GSM4626771 | OA |
| GSM4626771_GCATGCGTCCCACTTG-1  | GSM4626771 | OA |
| GSM4626771_GCATGTAAGGTTCTTA-1  | GSM4626771 | OA |
| GSM4626771_GCATGTACACGTGAGA-1  | GSM4626771 | OA |
| GSM4626771_GCATGTACATGTAAGA-1  | GSM4626771 | OA |
| GSM4626771_GCATGTAGTAGAGCTG-1  | GSM4626771 | OA |
| GSM4626771_GCATGTAGTATTCTCT-1  | GSM4626771 | OA |
| GSM4626771_GCATGTAGTCTTCAAG-1  | GSM4626771 | OA |
| GSM4626771_GCATGTAGTGCGGTAA-1  | GSM4626771 | OA |
| GSM4626771_GCATGTAGTTTGGCGC-1  | GSM4626771 | OA |
| GSM4626771_GCATGTATCTGATACG-1  | GSM4626771 | OA |
| GSM4626771_GCATGTATCTTGACGA-1  | GSM4626771 | OA |
| GSM4626771_GCCAAATAGAATTCCC-1  | GSM4626771 | OA |
| GSM4626771_GCCAAATCACACCGCA-1  | GSM4626771 | OA |
| GSM4626771_GCCAAATCACGTGAGA-1  | GSM4626771 | OA |
| GSM4626771_GCCAAATCATGCAACT-1  | GSM4626771 | OA |
| GSM4626771_GCCAAATGTCGCGGTT-1  | GSM4626771 | OA |
| GSM4626771_GCCAAATGTGCGCTTG-1  | GSM4626771 | OA |
| GSM4626771_GCCAAATGTGTTTGGT-1  | GSM4626771 | OA |
| GSM4626771_GCCAAATGTTAAGGGC-1  | GSM4626771 | OA |
| GSM4626771_GCCAAATTCAAAGTAG-1  | GSM4626771 | OA |
| GSM4626771_GCCAAATTCAGATCC-1   | GSM4626771 | OA |
| GSM4626771_GCCAAATTCACGAAGG-1  | GSM4626771 | OA |
| GSM4626771_GCCAAATTCGCTAGCG-1  | GSM4626771 | OA |

|                                |            |    |
|--------------------------------|------------|----|
| GSM4626771_GCCAAATTCTCATTCA-1  | GSM4626771 | OA |
| GSM4626771_GCCTCTAAGAGTAAGG-1  | GSM4626771 | OA |
| GSM4626771_GCCTCTAAGATAGTCA-1  | GSM4626771 | OA |
| GSM4626771_GCCTCTAAGCAGCCTC-1  | GSM4626771 | OA |
| GSM4626771_GCCTCTAAGTCGCCGT-1  | GSM4626771 | OA |
| GSM4626771_GCCTCTACACAAGCCC-1  | GSM4626771 | OA |
| GSM4626771_GCCTCTAGTAGCGTGA-1  | GSM4626771 | OA |
| GSM4626771_GCCTCTAGTCCTCTTG-1  | GSM4626771 | OA |
| GSM4626771_GCCTCTAGTGTTTGGT-1  | GSM4626771 | OA |
| GSM4626771_GCGACCAAGAGAACAG-1  | GSM4626771 | OA |
| GSM4626771_GCGACCACACCCAGTG-1  | GSM4626771 | OA |
| GSM4626771_GCGACCACATCCTAGA-1  | GSM4626771 | OA |
| GSM4626771_GCGACCACATCGGACC-1  | GSM4626771 | OA |
| GSM4626771_GCGACCAGTAGCCTAT-1  | GSM4626771 | OA |
| GSM4626771_GCGACCAGTCTCTCGT-1  | GSM4626771 | OA |
| GSM4626771_GCGACCAGTTGTCTTT-1  | GSM4626771 | OA |
| GSM4626771_GCGACCATCAGTTAGC-1  | GSM4626771 | OA |
| GSM4626771_GCGAGAAAGACGACGT-1  | GSM4626771 | OA |
| GSM4626771_GCGAGAAAGATACACA-1  | GSM4626771 | OA |
| GSM4626771_GCGAGAAAGTCGTTTG-1  | GSM4626771 | OA |
| GSM4626771_GCGAGAACAATAGAGT-1  | GSM4626771 | OA |
| GSM4626771_GCGAGAACAGAGTGTG-1  | GSM4626771 | OA |
| GSM4626771_GCGAGAAGTTCAGGCC-1  | GSM4626771 | OA |
| GSM4626771_GCGAGAATCGAATGCT-1  | GSM4626771 | OA |
| GSM4626771_GCGAGAATCTGCGGCA-1  | GSM4626771 | OA |
| GSM4626771_GCGAGAATCTGGCGTG-1  | GSM4626771 | OA |
| GSM4626771_GCGCAACAGCTGTCTA-1  | GSM4626771 | OA |
| GSM4626771_GCGCAACCAGTTTACG-1  | GSM4626771 | OA |
| GSM4626771_GCGCAACCATGGTAGG-1  | GSM4626771 | OA |
| GSM4626771_GCGCAACGTCAAGCGA-1  | GSM4626771 | OA |
| GSM4626771_GCGCAACGTCTTGCGG-1  | GSM4626771 | OA |
| GSM4626771_GCGCAACGTTCGTCTC-1  | GSM4626771 | OA |
| GSM4626771_GCGCAACTCATACGGT-1  | GSM4626771 | OA |
| GSM4626771_GCGCAACTCCACGAAT-1  | GSM4626771 | OA |
| GSM4626771_GCGCAACTCCTTGGTC-1  | GSM4626771 | OA |
| GSM4626771_GCGCAACTCTAACTTC-1  | GSM4626771 | OA |
| GSM4626771_GCGCAACTCTGGCGTG-1  | GSM4626771 | OA |
| GSM4626771_GCGCAGTAGAGTCTGG-1  | GSM4626771 | OA |
| GSM4626771_GCGCAGTAGCAGGCTA-1  | GSM4626771 | OA |
| GSM4626771_GCGCAGTAGGCAATTA-1  | GSM4626771 | OA |
| GSM4626771_GCGCAGTAGTGCCATT-1  | GSM4626771 | OA |
| GSM4626771_GCGCAGTAGTTTGCGT-1  | GSM4626771 | OA |
| GSM4626771_GCGCAGTCATTTCACT-1  | GSM4626771 | OA |
| GSM4626771_GCGCAGTGTGTCTGAT-1  | GSM4626771 | OA |
| GSM4626771_GCGCAGTGTGTTGAGG-1  | GSM4626771 | OA |
| GSM4626771_GCGCAGTGTTCACCTC-1  | GSM4626771 | OA |
| GSM4626771_GCGCAGTGTGTTGGA-1   | GSM4626771 | OA |
| GSM4626771_GCGCAGTTCAACACCA-1  | GSM4626771 | OA |
| GSM4626771_GCGCAGTTCAGCTTAG-1  | GSM4626771 | OA |
| GSM4626771_GCGCAGTTCGAGGTAG-1  | GSM4626771 | OA |
| GSM4626771_GCGCAGTTCCTTGAT-1   | GSM4626771 | OA |
| GSM4626771_GCGCAGTTCCTTCCTC-1  | GSM4626771 | OA |
| GSM4626771_GCGCCAAAGAGTAATC-1  | GSM4626771 | OA |
| GSM4626771_GCGCCAAAGCGTCTAT-1  | GSM4626771 | OA |
| GSM4626771_GCGCCAAAGCTAGCCC-1  | GSM4626771 | OA |
| GSM4626771_GCGCCAACACCAGTTA-1  | GSM4626771 | OA |
| GSM4626771_GCGCCAAAGTGCTGTAT-1 | GSM4626771 | OA |

|                                |            |    |
|--------------------------------|------------|----|
| GSM4626771_GCGCCAATCGGCTTGG-1  | GSM4626771 | OA |
| GSM4626771_GCGCGATCAACGATCT-1  | GSM4626771 | OA |
| GSM4626771_GCGCGATTCCACGCAG-1  | GSM4626771 | OA |
| GSM4626771_GCGCGATTCTGCCAT-1   | GSM4626771 | OA |
| GSM4626771_GCGCGATTCTGCGTAA-1  | GSM4626771 | OA |
| GSM4626771_GCGCGATTCTTGATC-1   | GSM4626771 | OA |
| GSM4626771_GCGGGTTAGAGAACAG-1  | GSM4626771 | OA |
| GSM4626771_GCGGGTTAGTCACGCC-1  | GSM4626771 | OA |
| GSM4626771_GCGGGTTAGTGCTGCC-1  | GSM4626771 | OA |
| GSM4626771_GCGGGTTGTAATGTG-1   | GSM4626771 | OA |
| GSM4626771_GCGGGTTGTCTCATCC-1  | GSM4626771 | OA |
| GSM4626771_GCGGGTTGTGTCGCTG-1  | GSM4626771 | OA |
| GSM4626771_GCGGGTTTCACCAGGC-1  | GSM4626771 | OA |
| GSM4626771_GCTCCTAAGATCCGAG-1  | GSM4626771 | OA |
| GSM4626771_GCTCCTAAGCAGGCTA-1  | GSM4626771 | OA |
| GSM4626771_GCTCCTAAGCTAACTC-1  | GSM4626771 | OA |
| GSM4626771_GCTCCTACAACCTTGAC-1 | GSM4626771 | OA |
| GSM4626771_GCTCCTACACGAAGCA-1  | GSM4626771 | OA |
| GSM4626771_GCTCCTAGTAAATGTG-1  | GSM4626771 | OA |
| GSM4626771_GCTCCTAGTACCGAGA-1  | GSM4626771 | OA |
| GSM4626771_GCTCCTAGTCGAGTTT-1  | GSM4626771 | OA |
| GSM4626771_GCTCCTATCAGTACGT-1  | GSM4626771 | OA |
| GSM4626771_GCTCCTATCCGCTGTT-1  | GSM4626771 | OA |
| GSM4626771_GCTCTGTAGAATAGGG-1  | GSM4626771 | OA |
| GSM4626771_GCTCTGTAGTGGCACA-1  | GSM4626771 | OA |
| GSM4626771_GCTCTGTCACCGAAAG-1  | GSM4626771 | OA |
| GSM4626771_GCTCTGTTCCAGAGGA-1  | GSM4626771 | OA |
| GSM4626771_GCTCTGTTCTGTACC-1   | GSM4626771 | OA |
| GSM4626771_GCTGCAGAGCTCCTTC-1  | GSM4626771 | OA |
| GSM4626771_GCTGCAGAGTCCATAC-1  | GSM4626771 | OA |
| GSM4626771_GCTGCAGCACATGGGA-1  | GSM4626771 | OA |
| GSM4626771_GCTGCAGCACTATCTT-1  | GSM4626771 | OA |
| GSM4626771_GCTGCAGGTAGCTGCC-1  | GSM4626771 | OA |
| GSM4626771_GCTGCAGGTCCAGTTA-1  | GSM4626771 | OA |
| GSM4626771_GCTGCAGTCTCCAGGG-1  | GSM4626771 | OA |
| GSM4626771_GCTGCAGTCTGATACG-1  | GSM4626771 | OA |
| GSM4626771_GCTGCAGTCTGCCCTA-1  | GSM4626771 | OA |
| GSM4626771_GCTGCAGTCTTTACAC-1  | GSM4626771 | OA |
| GSM4626771_GCTGCGAAGATTACCC-1  | GSM4626771 | OA |
| GSM4626771_GCTGCGAAGCGAGAAA-1  | GSM4626771 | OA |
| GSM4626771_GCTGCGAAGGGCACTA-1  | GSM4626771 | OA |
| GSM4626771_GCTGCGAAGTGGCACA-1  | GSM4626771 | OA |
| GSM4626771_GCTGCGACATGCGCAC-1  | GSM4626771 | OA |
| GSM4626771_GCTGCGAGTACCGAGA-1  | GSM4626771 | OA |
| GSM4626771_GCTGCGAGTACGACCC-1  | GSM4626771 | OA |
| GSM4626771_GCTGCGAGTATAGGTA-1  | GSM4626771 | OA |
| GSM4626771_GCTGCGATCTGAAAGA-1  | GSM4626771 | OA |
| GSM4626771_GCTGCTTAGCTCCTCT-1  | GSM4626771 | OA |
| GSM4626771_GCTGCTTAGTGAAGTT-1  | GSM4626771 | OA |
| GSM4626771_GCTGCTTACGACTCG-1   | GSM4626771 | OA |
| GSM4626771_GCTGCTTACGACGTA-1   | GSM4626771 | OA |
| GSM4626771_GCTGCTTGTTCTGTTT-1  | GSM4626771 | OA |
| GSM4626771_GCTGCTTTACAGTAC-1   | GSM4626771 | OA |
| GSM4626771_GCTGGGTAGCTAGTCT-1  | GSM4626771 | OA |
| GSM4626771_GCTGGGTACGGTTAG-1   | GSM4626771 | OA |
| GSM4626771_GCTGGGTGTACCATCA-1  | GSM4626771 | OA |
| GSM4626771_GCTGGGTGTCCGAACC-1  | GSM4626771 | OA |

|                                |            |    |
|--------------------------------|------------|----|
| GSM4626771_GCTGGGTTTCGCAGGCT-1 | GSM4626771 | OA |
| GSM4626771_GCTTCCAAGCCCTAAT-1  | GSM4626771 | OA |
| GSM4626771_GCTTCCAAGCCGGTAA-1  | GSM4626771 | OA |
| GSM4626771_GCTTCCACAAACAACA-1  | GSM4626771 | OA |
| GSM4626771_GCTTCCACAATTCCTT-1  | GSM4626771 | OA |
| GSM4626771_GCTTCCACATCTACGA-1  | GSM4626771 | OA |
| GSM4626771_GCTTCCAGTGGCGAAT-1  | GSM4626771 | OA |
| GSM4626771_GCTTCCAGTTCGAATC-1  | GSM4626771 | OA |
| GSM4626771_GCTTCCAGTTGCGCAC-1  | GSM4626771 | OA |
| GSM4626771_GCTTCCATCAGAGCTT-1  | GSM4626771 | OA |
| GSM4626771_GCTTCCATCGACGAA-1   | GSM4626771 | OA |
| GSM4626771_GCTTGAAAGACCTAGG-1  | GSM4626771 | OA |
| GSM4626771_GCTTGAACAGGTGGAT-1  | GSM4626771 | OA |
| GSM4626771_GCTTGAAGTGTATGGG-1  | GSM4626771 | OA |
| GSM4626771_GCTTGAAGTTGGTGG-1   | GSM4626771 | OA |
| GSM4626771_GCTTGAATCTATCGCC-1  | GSM4626771 | OA |
| GSM4626771_GGAAAGCAGAGTGAGA-1  | GSM4626771 | OA |
| GSM4626771_GGAAAGCAGCTAGTCT-1  | GSM4626771 | OA |
| GSM4626771_GGAAAGCAGTAATCCC-1  | GSM4626771 | OA |
| GSM4626771_GGAAAGCAGTTAGGTA-1  | GSM4626771 | OA |
| GSM4626771_GGAAAGCCAAGCTGGA-1  | GSM4626771 | OA |
| GSM4626771_GGAAAGCCACGCGAAA-1  | GSM4626771 | OA |
| GSM4626771_GGAAAGCCATGAACCT-1  | GSM4626771 | OA |
| GSM4626771_GGAAAGCGTAACGCGA-1  | GSM4626771 | OA |
| GSM4626771_GGAAAGCGTCAACTGT-1  | GSM4626771 | OA |
| GSM4626771_GGAAAGCGTCTGATTG-1  | GSM4626771 | OA |
| GSM4626771_GGAAAGCGTGCATCTA-1  | GSM4626771 | OA |
| GSM4626771_GGAAAGCGTTACGCGC-1  | GSM4626771 | OA |
| GSM4626771_GGAAAGCTCATTGCGA-1  | GSM4626771 | OA |
| GSM4626771_GGAACTTAGCCACTAT-1  | GSM4626771 | OA |
| GSM4626771_GGAACTTAGGAGTTTA-1  | GSM4626771 | OA |
| GSM4626771_GGAACTTAGGCTAGGT-1  | GSM4626771 | OA |
| GSM4626771_GGAACTTGTGCTGTAT-1  | GSM4626771 | OA |
| GSM4626771_GGAACTTTCGTCACGG-1  | GSM4626771 | OA |
| GSM4626771_GGAATAAAGAGCCTAG-1  | GSM4626771 | OA |
| GSM4626771_GGAATAAAGTTAGCGG-1  | GSM4626771 | OA |
| GSM4626771_GGAATAACACGAAGCA-1  | GSM4626771 | OA |
| GSM4626771_GGAATAACATTCTCAT-1  | GSM4626771 | OA |
| GSM4626771_GGAATAAGTAGAGTGC-1  | GSM4626771 | OA |
| GSM4626771_GGAATAATCTCTTATG-1  | GSM4626771 | OA |
| GSM4626771_GGACAAGAGAAACCGC-1  | GSM4626771 | OA |
| GSM4626771_GGACAAGAGAATGTTG-1  | GSM4626771 | OA |
| GSM4626771_GGACAAGAGATGAGAG-1  | GSM4626771 | OA |
| GSM4626771_GGACAAGAGCGTGTCC-1  | GSM4626771 | OA |
| GSM4626771_GGACAAGAGGCTAGAC-1  | GSM4626771 | OA |
| GSM4626771_GGACAAGCAAGACGTG-1  | GSM4626771 | OA |
| GSM4626771_GGACAAGCACGGTGTG-1  | GSM4626771 | OA |
| GSM4626771_GGACAAGGTCCATCCT-1  | GSM4626771 | OA |
| GSM4626771_GGACAAGGTTTCGCTC-1  | GSM4626771 | OA |
| GSM4626771_GGACAAGTCCACGTTT-1  | GSM4626771 | OA |
| GSM4626771_GGACAAGTCCGTCATC-1  | GSM4626771 | OA |
| GSM4626771_GGACAAGTCGCAAGCC-1  | GSM4626771 | OA |
| GSM4626771_GGACAAGTCTATCGCC-1  | GSM4626771 | OA |
| GSM4626771_GGACAAGTCTCCAACC-1  | GSM4626771 | OA |
| GSM4626771_GGACAGAAGATGTGTA-1  | GSM4626771 | OA |
| GSM4626771_GGACAGAAGCCAGTTT-1  | GSM4626771 | OA |
| GSM4626771_GGACAGAAGCCCGAAA-1  | GSM4626771 | OA |

|                                |            |    |
|--------------------------------|------------|----|
| GSM4626771_GGACAGAAGTGGACGT-1  | GSM4626771 | OA |
| GSM4626771_GGACAGACACAGACTT-1  | GSM4626771 | OA |
| GSM4626771_GGACAGACACAGATTC-1  | GSM4626771 | OA |
| GSM4626771_GGACAGACATATGGTC-1  | GSM4626771 | OA |
| GSM4626771_GGACAGAGTAACGCGA-1  | GSM4626771 | OA |
| GSM4626771_GGACAGAGTATAGTAG-1  | GSM4626771 | OA |
| GSM4626771_GGACAGAGTCGTTGTA-1  | GSM4626771 | OA |
| GSM4626771_GGACAGAGTCTCCCTA-1  | GSM4626771 | OA |
| GSM4626771_GGACAGAGTGATGATA-1  | GSM4626771 | OA |
| GSM4626771_GGACAGAGTTACGCGC-1  | GSM4626771 | OA |
| GSM4626771_GGACAGATCAAGGTAA-1  | GSM4626771 | OA |
| GSM4626771_GGACAGATCATGGTCA-1  | GSM4626771 | OA |
| GSM4626771_GGACAGATCATGTCCC-1  | GSM4626771 | OA |
| GSM4626771_GGACAGATCATGTCTT-1  | GSM4626771 | OA |
| GSM4626771_GGACATTAGCCCTAAT-1  | GSM4626771 | OA |
| GSM4626771_GGACATTCACCAGATT-1  | GSM4626771 | OA |
| GSM4626771_GGACATTGTGTCCTCT-1  | GSM4626771 | OA |
| GSM4626771_GGACATTTCAACCAAC-1  | GSM4626771 | OA |
| GSM4626771_GGACATTTCTCTAGC-1   | GSM4626771 | OA |
| GSM4626771_GGACATTTCTTTACA-1   | GSM4626771 | OA |
| GSM4626771_GGACATTTCTTCTGGC-1  | GSM4626771 | OA |
| GSM4626771_GGACGTCAGAAGCCCA-1  | GSM4626771 | OA |
| GSM4626771_GGACGTCAGCGATGAC-1  | GSM4626771 | OA |
| GSM4626771_GGACGTCAGCTAGCCC-1  | GSM4626771 | OA |
| GSM4626771_GGACGTCAGGCGATAC-1  | GSM4626771 | OA |
| GSM4626771_GGACGTCAGTACGCC-1   | GSM4626771 | OA |
| GSM4626771_GGACGTCAGTGTTAGA-1  | GSM4626771 | OA |
| GSM4626771_GGACGTCAGTTCGATC-1  | GSM4626771 | OA |
| GSM4626771_GGACGTCCAAATTGCC-1  | GSM4626771 | OA |
| GSM4626771_GGACGTCACGCGAAA-1   | GSM4626771 | OA |
| GSM4626771_GGACGTCGTCCTGGC-1   | GSM4626771 | OA |
| GSM4626771_GGACGTCGTCAGAATA-1  | GSM4626771 | OA |
| GSM4626771_GGACGTCTCTGATTCT-1  | GSM4626771 | OA |
| GSM4626771_GGAGCAAAGACACTAA-1  | GSM4626771 | OA |
| GSM4626771_GGAGCAAAGATGTGGC-1  | GSM4626771 | OA |
| GSM4626771_GGAGCAAAGCCACCTG-1  | GSM4626771 | OA |
| GSM4626771_GGAGCAACACTGTCCGG-1 | GSM4626771 | OA |
| GSM4626771_GGAGCAACAGTCTTCC-1  | GSM4626771 | OA |
| GSM4626771_GGAGCAACATGTCCTC-1  | GSM4626771 | OA |
| GSM4626771_GGAGCAAGTAACGTTT-1  | GSM4626771 | OA |
| GSM4626771_GGAGCAAGTCAGAGGT-1  | GSM4626771 | OA |
| GSM4626771_GGAGCAAGTGAGCGAT-1  | GSM4626771 | OA |
| GSM4626771_GGAGCAATCTTGCCGT-1  | GSM4626771 | OA |
| GSM4626771_GGATGTTAGAGTGAGA-1  | GSM4626771 | OA |
| GSM4626771_GGATGTTAGTTGAGAT-1  | GSM4626771 | OA |
| GSM4626771_GGATGTTACAGATTC-1   | GSM4626771 | OA |
| GSM4626771_GGATGTTGTACATCCA-1  | GSM4626771 | OA |
| GSM4626771_GGATGTTGTATAGTAG-1  | GSM4626771 | OA |
| GSM4626771_GGATGTTGTTTCCACC-1  | GSM4626771 | OA |
| GSM4626771_GGATGTTGTTTGTTC-1   | GSM4626771 | OA |
| GSM4626771_GGATTACAGTGACATA-1  | GSM4626771 | OA |
| GSM4626771_GGATTACAGTTGTAGA-1  | GSM4626771 | OA |
| GSM4626771_GGATTACCAATTCCTT-1  | GSM4626771 | OA |
| GSM4626771_GGATTACCACGAAACG-1  | GSM4626771 | OA |
| GSM4626771_GGATTACCAGACACTT-1  | GSM4626771 | OA |
| GSM4626771_GGATTACCATTGGCC-1   | GSM4626771 | OA |
| GSM4626771_GGATTACGTCAACTGT-1  | GSM4626771 | OA |

|                                |            |    |
|--------------------------------|------------|----|
| GSM4626771_GGATTACGTTACGTCA-1  | GSM4626771 | OA |
| GSM4626771_GGATTACTCCGTAGTA-1  | GSM4626771 | OA |
| GSM4626771_GGATTACTCGTTACAG-1  | GSM4626771 | OA |
| GSM4626771_GGATTACTCTTCTGGC-1  | GSM4626771 | OA |
| GSM4626771_GGCAATTAGCTCAACT-1  | GSM4626771 | OA |
| GSM4626771_GGCAATTCAAGGACAC-1  | GSM4626771 | OA |
| GSM4626771_GGCAATTCACGTGAGA-1  | GSM4626771 | OA |
| GSM4626771_GGCAATTGTGCAACGA-1  | GSM4626771 | OA |
| GSM4626771_GGCAATTGTTACCTC-1   | GSM4626771 | OA |
| GSM4626771_GGCAATTGTTCAGACT-1  | GSM4626771 | OA |
| GSM4626771_GGCAATTTACAACGT-1   | GSM4626771 | OA |
| GSM4626771_GGCAATTTTCATGTAGC-1 | GSM4626771 | OA |
| GSM4626771_GGCAATTTCTGACCTC-1  | GSM4626771 | OA |
| GSM4626771_GGCCGATGTTAAAGAC-1  | GSM4626771 | OA |
| GSM4626771_GGCCGATGTTACGGAG-1  | GSM4626771 | OA |
| GSM4626771_GGCCGATTCAGAGACG-1  | GSM4626771 | OA |
| GSM4626771_GGCCGATTCCGAACGC-1  | GSM4626771 | OA |
| GSM4626771_GGCGACTAGAGTAATC-1  | GSM4626771 | OA |
| GSM4626771_GGCGACTAGAGTGACC-1  | GSM4626771 | OA |
| GSM4626771_GGCGACTAGCTATGCT-1  | GSM4626771 | OA |
| GSM4626771_GGCGACTAGCTCAACT-1  | GSM4626771 | OA |
| GSM4626771_GGCGACTGTCAGCTAT-1  | GSM4626771 | OA |
| GSM4626771_GGCGACTTCAACGCTA-1  | GSM4626771 | OA |
| GSM4626771_GGCGACTTCTGGGCCA-1  | GSM4626771 | OA |
| GSM4626771_GGCGTGTCAATCGGTT-1  | GSM4626771 | OA |
| GSM4626771_GGCGTGTACCAGGCT-1   | GSM4626771 | OA |
| GSM4626771_GGCGTGTACGTCAGC-1   | GSM4626771 | OA |
| GSM4626771_GGCGTGTGTATCTGCA-1  | GSM4626771 | OA |
| GSM4626771_GGCGTGTGTATCGGC-1   | GSM4626771 | OA |
| GSM4626771_GGCGTGTGTCTGCCAG-1  | GSM4626771 | OA |
| GSM4626771_GGCGTGTGTTACGGAG-1  | GSM4626771 | OA |
| GSM4626771_GGCGTGTGTTTGTGTG-1  | GSM4626771 | OA |
| GSM4626771_GGCGTGTTCACAGGCC-1  | GSM4626771 | OA |
| GSM4626771_GGCGTGTTCCTCTTT-1   | GSM4626771 | OA |
| GSM4626771_GGCTCGAAGACACTAA-1  | GSM4626771 | OA |
| GSM4626771_GGCTCGAAGTCCAGGA-1  | GSM4626771 | OA |
| GSM4626771_GGCTCGACAAGTAGTA-1  | GSM4626771 | OA |
| GSM4626771_GGCTCGACAAGTCTGT-1  | GSM4626771 | OA |
| GSM4626771_GGCTCGACACACATGT-1  | GSM4626771 | OA |
| GSM4626771_GGCTCGAGTATAGGTA-1  | GSM4626771 | OA |
| GSM4626771_GGCTCGAGTTTAGCTG-1  | GSM4626771 | OA |
| GSM4626771_GGCTCGATCATCTGCC-1  | GSM4626771 | OA |
| GSM4626771_GGCTCGATCCGTAGTA-1  | GSM4626771 | OA |
| GSM4626771_GGCTCGATCTGTCTCG-1  | GSM4626771 | OA |
| GSM4626771_GGCTCGATCTTGTATC-1  | GSM4626771 | OA |
| GSM4626771_GGCTGGTAGGATATAC-1  | GSM4626771 | OA |
| GSM4626771_GGCTGGTAGGGATCTG-1  | GSM4626771 | OA |
| GSM4626771_GGCTGGTAGTCGATAA-1  | GSM4626771 | OA |
| GSM4626771_GGCTGGTCATGCTAGT-1  | GSM4626771 | OA |
| GSM4626771_GGCTGGTGTAACCTC-1   | GSM4626771 | OA |
| GSM4626771_GGCTGGTGTATGAATG-1  | GSM4626771 | OA |
| GSM4626771_GGCTGGTGTGATGTCT-1  | GSM4626771 | OA |
| GSM4626771_GGCTGGTGTGGCTCCA-1  | GSM4626771 | OA |
| GSM4626771_GGCTGGTGTGTAATGA-1  | GSM4626771 | OA |
| GSM4626771_GGCTGGTGTTCGAATC-1  | GSM4626771 | OA |
| GSM4626771_GGCTGGTGTTCGTTA-1   | GSM4626771 | OA |
| GSM4626771_GGCTGGTTCGGTAGTA-1  | GSM4626771 | OA |



|                                 |            |    |
|---------------------------------|------------|----|
| GSM4626771_GGCTGGTTCTCCGGTT-1   | GSM4626771 | OA |
| GSM4626771_GGGAATGAGACAGAGA-1   | GSM4626771 | OA |
| GSM4626771_GGGAATGAGCTCCCAG-1   | GSM4626771 | OA |
| GSM4626771_GGGAATGAGGAATTAC-1   | GSM4626771 | OA |
| GSM4626771_GGGAATGAGGAGTCTG-1   | GSM4626771 | OA |
| GSM4626771_GGGAATGAGGCTCAGA-1   | GSM4626771 | OA |
| GSM4626771_GGGAATGAGTGGTAGC-1   | GSM4626771 | OA |
| GSM4626771_GGGAATGCAGTTAACC-1   | GSM4626771 | OA |
| GSM4626771_GGGAATGCATGCAACT-1   | GSM4626771 | OA |
| GSM4626771_GGGAATGGTAGGCTGA-1   | GSM4626771 | OA |
| GSM4626771_GGGAATGGTCCAGTTA-1   | GSM4626771 | OA |
| GSM4626771_GGGAATGGTCTAGTCA-1   | GSM4626771 | OA |
| GSM4626771_GGGAATGGTTAAAGAC-1   | GSM4626771 | OA |
| GSM4626771_GGGAATGTCTAACGGT-1   | GSM4626771 | OA |
| GSM4626771_GGGAATGTCTGTTTGT-1   | GSM4626771 | OA |
| GSM4626771_GGGACCTAGAGTGAGA-1   | GSM4626771 | OA |
| GSM4626771_GGGACCTAGCAGGCTA-1   | GSM4626771 | OA |
| GSM4626771_GGGACCTAGGCGCTCT-1   | GSM4626771 | OA |
| GSM4626771_GGGACCTAGTCTCGGC-1   | GSM4626771 | OA |
| GSM4626771_GGGACCTAGTGGTAGC-1   | GSM4626771 | OA |
| GSM4626771_GGGACCTCATGCCTTC-1   | GSM4626771 | OA |
| GSM4626771_GGGACCTGTAAGTTCC-1   | GSM4626771 | OA |
| GSM4626771_GGGACCTGTGAAATCA-1   | GSM4626771 | OA |
| GSM4626771_GGGACCTGTTCGGGCT-1   | GSM4626771 | OA |
| GSM4626771_GGGACCTTCCTTCAAT-1   | GSM4626771 | OA |
| GSM4626771_GGGAGATAGTACGTAA-1   | GSM4626771 | OA |
| GSM4626771_GGGAGATCAGGGCATA-1   | GSM4626771 | OA |
| GSM4626771_GGGAGATCATAGGATA-1   | GSM4626771 | OA |
| GSM4626771_GGGAGATCATCATCCC-1   | GSM4626771 | OA |
| GSM4626771_GGGAGATGTATATGGA-1   | GSM4626771 | OA |
| GSM4626771_GGGAGATGTATGGTTC-1   | GSM4626771 | OA |
| GSM4626771_GGGAGATGTCCAACTA-1   | GSM4626771 | OA |
| GSM4626771_GGGAGATTCCACGACTA-1  | GSM4626771 | OA |
| GSM4626771_GGGAGATTCCACGACG-1   | GSM4626771 | OA |
| GSM4626771_GGGAGATTCTATCCCG-1   | GSM4626771 | OA |
| GSM4626771_GGGAGATTCTGAGGGA-1   | GSM4626771 | OA |
| GSM4626771_GGGAGATTCTTGATC-1    | GSM4626771 | OA |
| GSM4626771_GGGATGAAGTGTTGAA-1   | GSM4626771 | OA |
| GSM4626771_GGGATGAAGTTGAGTA-1   | GSM4626771 | OA |
| GSM4626771_GGGATGACAACGCACC-1   | GSM4626771 | OA |
| GSM4626771_GGGATGACAACACTGCTA-1 | GSM4626771 | OA |
| GSM4626771_GGGATGACAATGAAAC-1   | GSM4626771 | OA |
| GSM4626771_GGGATGACACGCCAGT-1   | GSM4626771 | OA |
| GSM4626771_GGGATGACATTACGAC-1   | GSM4626771 | OA |
| GSM4626771_GGGATGACATTCTCAT-1   | GSM4626771 | OA |
| GSM4626771_GGGATGAGTCAGTGGA-1   | GSM4626771 | OA |
| GSM4626771_GGGATGAGTCGCGAAA-1   | GSM4626771 | OA |
| GSM4626771_GGGATGAGTTACCAGT-1   | GSM4626771 | OA |
| GSM4626771_GGGATGATCAGCAACT-1   | GSM4626771 | OA |
| GSM4626771_GGGATGATCCCAAGTA-1   | GSM4626771 | OA |
| GSM4626771_GGGATGATCGAACTGT-1   | GSM4626771 | OA |
| GSM4626771_GGGCACTCACTTCGAA-1   | GSM4626771 | OA |
| GSM4626771_GGGCACTCAGGTTAG-1    | GSM4626771 | OA |
| GSM4626771_GGGCACTCATGCGCAC-1   | GSM4626771 | OA |
| GSM4626771_GGGCACTGTAGAAGGA-1   | GSM4626771 | OA |
| GSM4626771_GGGCACTGTCAGCTAT-1   | GSM4626771 | OA |
| GSM4626771_GGGCACTGTTTGCATG-1   | GSM4626771 | OA |

|                                 |            |    |
|---------------------------------|------------|----|
| GSM4626771_GGGCATCAGAACAACACT-1 | GSM4626771 | OA |
| GSM4626771_GGGCATCAGATGGCGT-1   | GSM4626771 | OA |
| GSM4626771_GGGCATCAGGTGTGGT-1   | GSM4626771 | OA |
| GSM4626771_GGGCATCCAAACCTAC-1   | GSM4626771 | OA |
| GSM4626771_GGGCATCCAACACCCG-1   | GSM4626771 | OA |
| GSM4626771_GGGCATCCAACTGGCC-1   | GSM4626771 | OA |
| GSM4626771_GGGCATCCACGGTGTC-1   | GSM4626771 | OA |
| GSM4626771_GGGCATCGTATCGCAT-1   | GSM4626771 | OA |
| GSM4626771_GGGCATCGTATGAAAC-1   | GSM4626771 | OA |
| GSM4626771_GGGCATCGTCTGGTCG-1   | GSM4626771 | OA |
| GSM4626771_GGGCATCTCCATTCTA-1   | GSM4626771 | OA |
| GSM4626771_GGGCATCTCTCTAAGG-1   | GSM4626771 | OA |
| GSM4626771_GGGTCTGAGACTGGGT-1   | GSM4626771 | OA |
| GSM4626771_GGGTCTGAGGAGCGAG-1   | GSM4626771 | OA |
| GSM4626771_GGGTCTGAGGGTTTCT-1   | GSM4626771 | OA |
| GSM4626771_GGGTCTGAGTTCCACA-1   | GSM4626771 | OA |
| GSM4626771_GGGTCTGAGTTCGCAT-1   | GSM4626771 | OA |
| GSM4626771_GGGTCTGCAAGGACAC-1   | GSM4626771 | OA |
| GSM4626771_GGGTCTGGTCTAGGTT-1   | GSM4626771 | OA |
| GSM4626771_GGGTCTGGTGTCAATC-1   | GSM4626771 | OA |
| GSM4626771_GGGTCTGGTTGGTTTG-1   | GSM4626771 | OA |
| GSM4626771_GGGTCTGTCATAGCAC-1   | GSM4626771 | OA |
| GSM4626771_GGGTCTGTCATTTGGG-1   | GSM4626771 | OA |
| GSM4626771_GGGTCTGTCCATGAGT-1   | GSM4626771 | OA |
| GSM4626771_GGGTCTGTCCGTTGTC-1   | GSM4626771 | OA |
| GSM4626771_GGGTCTGTCGCGTTTC-1   | GSM4626771 | OA |
| GSM4626771_GGGTTGCAGAGCTATA-1   | GSM4626771 | OA |
| GSM4626771_GGGTTGCCAATCGAAA-1   | GSM4626771 | OA |
| GSM4626771_GGGTTGCCAGGGATTG-1   | GSM4626771 | OA |
| GSM4626771_GGGTTGCCAGTCTTCC-1   | GSM4626771 | OA |
| GSM4626771_GGGTTGCCATGGAATA-1   | GSM4626771 | OA |
| GSM4626771_GGGTTGCGTCGGATCC-1   | GSM4626771 | OA |
| GSM4626771_GGGTTGCTCACATAGC-1   | GSM4626771 | OA |
| GSM4626771_GGGTTGCTCATCGCTC-1   | GSM4626771 | OA |
| GSM4626771_GGGTTGCTCGTGGGAA-1   | GSM4626771 | OA |
| GSM4626771_GGTATTGAGCCATCGC-1   | GSM4626771 | OA |
| GSM4626771_GGTATTGAGGCCATAG-1   | GSM4626771 | OA |
| GSM4626771_GGTATTGCATTACCTT-1   | GSM4626771 | OA |
| GSM4626771_GGTATTGGTTCGCATAT-1  | GSM4626771 | OA |
| GSM4626771_GGTATTGGTGCCTGCA-1   | GSM4626771 | OA |
| GSM4626771_GGTATTGGTTCGTCTC-1   | GSM4626771 | OA |
| GSM4626771_GGTATTGTCCACTCCA-1   | GSM4626771 | OA |
| GSM4626771_GGTATTGTCCAAGTA-1    | GSM4626771 | OA |
| GSM4626771_GGTATTGTCCGCGTTT-1   | GSM4626771 | OA |
| GSM4626771_GGTATTGTCTTGACC-1    | GSM4626771 | OA |
| GSM4626771_GGTATTGTCCGCAAT-1    | GSM4626771 | OA |
| GSM4626771_GGTATTGTCTGGTATG-1   | GSM4626771 | OA |
| GSM4626771_GGTGAAGAGAAGCCCA-1   | GSM4626771 | OA |
| GSM4626771_GGTGAAGAGAGGTAGA-1   | GSM4626771 | OA |
| GSM4626771_GGTGAAGAGTCGTA-1     | GSM4626771 | OA |
| GSM4626771_GGTGAAGCACTTACGA-1   | GSM4626771 | OA |
| GSM4626771_GGTGAAGCAGGAATCG-1   | GSM4626771 | OA |
| GSM4626771_GGTGAAGCAGGCAGTA-1   | GSM4626771 | OA |
| GSM4626771_GGTGAAGGTAATCACC-1   | GSM4626771 | OA |
| GSM4626771_GGTGAAGGTGGCAAAC-1   | GSM4626771 | OA |
| GSM4626771_GGTGAAGGTTGAGTTC-1   | GSM4626771 | OA |

|                                |            |    |
|--------------------------------|------------|----|
| GSM4626771_GGTGAAGTCAAACGGG-1  | GSM4626771 | OA |
| GSM4626771_GGTGAAGTCAAGATCC-1  | GSM4626771 | OA |
| GSM4626771_GGTGAAGTCATCGGAT-1  | GSM4626771 | OA |
| GSM4626771_GGTGAAGTCCACTCCA-1  | GSM4626771 | OA |
| GSM4626771_GGTGAAGTCGACAGCC-1  | GSM4626771 | OA |
| GSM4626771_GGTGCGTAGAAGGCCT-1  | GSM4626771 | OA |
| GSM4626771_GGTGCGTAGGTGTGGT-1  | GSM4626771 | OA |
| GSM4626771_GGTGCGTCAGGTCTCG-1  | GSM4626771 | OA |
| GSM4626771_GGTGCGTCATGTTCCC-1  | GSM4626771 | OA |
| GSM4626771_GGTGCGTGTGGTCTCG-1  | GSM4626771 | OA |
| GSM4626771_GGTGCGTTCCTTGCCA-1  | GSM4626771 | OA |
| GSM4626771_GGTGCGTTCCTGCTTGC-1 | GSM4626771 | OA |
| GSM4626771_GGTGTTAAGACTTGAA-1  | GSM4626771 | OA |
| GSM4626771_GGTGTTAAGATGTGTA-1  | GSM4626771 | OA |
| GSM4626771_GGTGTTAAGCAGATCG-1  | GSM4626771 | OA |
| GSM4626771_GGTGTTAAGGCATGTG-1  | GSM4626771 | OA |
| GSM4626771_GGTGTTACATCGATGT-1  | GSM4626771 | OA |
| GSM4626771_GGTGTTAGTACCTACA-1  | GSM4626771 | OA |
| GSM4626771_GGTGTTAGTCACCTAA-1  | GSM4626771 | OA |
| GSM4626771_GGTGTTAGTCCCTTGT-1  | GSM4626771 | OA |
| GSM4626771_GGTGTTAGTGCACGAA-1  | GSM4626771 | OA |
| GSM4626771_GGTGTTAGTTCACAA-1   | GSM4626771 | OA |
| GSM4626771_GGTGTTAGTTTGTGTG-1  | GSM4626771 | OA |
| GSM4626771_GGTGTTATCCAACTG-1   | GSM4626771 | OA |
| GSM4626771_GGTGTTATCCATGAAC-1  | GSM4626771 | OA |
| GSM4626771_GGTGTTATCTGAGTGT-1  | GSM4626771 | OA |
| GSM4626771_GTAACGTAGCTAGTCT-1  | GSM4626771 | OA |
| GSM4626771_GTAACGTAGGCAATTA-1  | GSM4626771 | OA |
| GSM4626771_GTAACGTCAACACCTA-1  | GSM4626771 | OA |
| GSM4626771_GTAACGTATCACCCCT-1  | GSM4626771 | OA |
| GSM4626771_GTAACGTGTATTCGTG-1  | GSM4626771 | OA |
| GSM4626771_GTAACGTGTGTTGGGA-1  | GSM4626771 | OA |
| GSM4626771_GTAACGTGTTTCCACC-1  | GSM4626771 | OA |
| GSM4626771_GTAACGTTC AACGCTA-1 | GSM4626771 | OA |
| GSM4626771_GTAACGTTCCGTAGGC-1  | GSM4626771 | OA |
| GSM4626771_GTAACTGAGAAGGGTA-1  | GSM4626771 | OA |
| GSM4626771_GTAACTGAGCCGATTT-1  | GSM4626771 | OA |
| GSM4626771_GTAACTGAGTCGAGTG-1  | GSM4626771 | OA |
| GSM4626771_GTAACTGCAAAGCGT-1   | GSM4626771 | OA |
| GSM4626771_GTAACTGCAGCCTTTC-1  | GSM4626771 | OA |
| GSM4626771_GTAACTGCAGCTGCTG-1  | GSM4626771 | OA |
| GSM4626771_GTAACTGCAGGCTGAA-1  | GSM4626771 | OA |
| GSM4626771_GTAACTGCATCGGGTC-1  | GSM4626771 | OA |
| GSM4626771_GTAACTGTCACAATGC-1  | GSM4626771 | OA |
| GSM4626771_GTAACTGTCCTAGGGC-1  | GSM4626771 | OA |
| GSM4626771_GTACGTAAGCAGATCG-1  | GSM4626771 | OA |
| GSM4626771_GTACGTAAGCCAGAAC-1  | GSM4626771 | OA |
| GSM4626771_GTACGTAAGCTCCAG-1   | GSM4626771 | OA |
| GSM4626771_GTACGTAAGGTGATAT-1  | GSM4626771 | OA |
| GSM4626771_GTACGTAAGTTTCCTT-1  | GSM4626771 | OA |
| GSM4626771_GTACGTACAAACCTAC-1  | GSM4626771 | OA |
| GSM4626771_GTACGTACAAGCCCAC-1  | GSM4626771 | OA |
| GSM4626771_GTACGTACACCTCGTT-1  | GSM4626771 | OA |
| GSM4626771_GTACGTACATTT CAGG-1 | GSM4626771 | OA |
| GSM4626771_GTACGTAGTACACCGC-1  | GSM4626771 | OA |
| GSM4626771_GTACGTAGTACCGTAT-1  | GSM4626771 | OA |
| GSM4626771_GTACGTAGTAGGAGTC-1  | GSM4626771 | OA |

|                                |            |    |
|--------------------------------|------------|----|
| GSM4626771_GTACGTAGTGCAGGTA-1  | GSM4626771 | OA |
| GSM4626771_GTACGTATCAAGCCTA-1  | GSM4626771 | OA |
| GSM4626771_GTACGTATCAATAAGG-1  | GSM4626771 | OA |
| GSM4626771_GTACTCCAGAAAGTGG-1  | GSM4626771 | OA |
| GSM4626771_GTACTCCGTCATATCG-1  | GSM4626771 | OA |
| GSM4626771_GTACTCCGTTCCGGCAC-1 | GSM4626771 | OA |
| GSM4626771_GTACTCCTCACAATGC-1  | GSM4626771 | OA |
| GSM4626771_GTACTTTAGCACAGGT-1  | GSM4626771 | OA |
| GSM4626771_GTACTTTAGCAGCGTA-1  | GSM4626771 | OA |
| GSM4626771_GTACTTTAGGACACCA-1  | GSM4626771 | OA |
| GSM4626771_GTACTTTAGGAGTAGA-1  | GSM4626771 | OA |
| GSM4626771_GTACTTTAGGCCGAAT-1  | GSM4626771 | OA |
| GSM4626771_GTACTTTCAAGGACAC-1  | GSM4626771 | OA |
| GSM4626771_GTACTTTCAGCTGTAT-1  | GSM4626771 | OA |
| GSM4626771_GTACTTTGTCTCACCT-1  | GSM4626771 | OA |
| GSM4626771_GTACTTTGTGAAGGCT-1  | GSM4626771 | OA |
| GSM4626771_GTACTTTGTGACAAAT-1  | GSM4626771 | OA |
| GSM4626771_GTACTTTGTGGGTATG-1  | GSM4626771 | OA |
| GSM4626771_GTACTTTGTTCAGTAC-1  | GSM4626771 | OA |
| GSM4626771_GTACTTTTCAGCTCTC-1  | GSM4626771 | OA |
| GSM4626771_GTACTTTTCCTGCTTG-1  | GSM4626771 | OA |
| GSM4626771_GTACTTTTCTGTCAAG-1  | GSM4626771 | OA |
| GSM4626771_GTACTTTTCTGTCCGT-1  | GSM4626771 | OA |
| GSM4626771_GTAGGCCAGACTTTCG-1  | GSM4626771 | OA |
| GSM4626771_GTAGGCCACGAGAGT-1   | GSM4626771 | OA |
| GSM4626771_GTAGGCCGTGGGTCAA-1  | GSM4626771 | OA |
| GSM4626771_GTAGGCCGTGTAAGTA-1  | GSM4626771 | OA |
| GSM4626771_GTAGGCCGTTAAGAAC-1  | GSM4626771 | OA |
| GSM4626771_GTAGGCCTCACGACTA-1  | GSM4626771 | OA |
| GSM4626771_GTAGGCCTCGATCCCT-1  | GSM4626771 | OA |
| GSM4626771_GTAGGCCTCGTACGGC-1  | GSM4626771 | OA |
| GSM4626771_GTAGTCAAGCAACGGT-1  | GSM4626771 | OA |
| GSM4626771_GTAGTCAAGCTCAACT-1  | GSM4626771 | OA |
| GSM4626771_GTAGTCACAATCGAAA-1  | GSM4626771 | OA |
| GSM4626771_GTAGTCAGTTCAGACT-1  | GSM4626771 | OA |
| GSM4626771_GTAGTCATCTTCGAGA-1  | GSM4626771 | OA |
| GSM4626771_GTATCTTAGATCCCGC-1  | GSM4626771 | OA |
| GSM4626771_GTATCTTAGCCTATGT-1  | GSM4626771 | OA |
| GSM4626771_GTATCTTAGTGTCCAT-1  | GSM4626771 | OA |
| GSM4626771_GTATCTTCAATGTAAG-1  | GSM4626771 | OA |
| GSM4626771_GTATCTTCAGATCCAT-1  | GSM4626771 | OA |
| GSM4626771_GTATCTTCAGTACACT-1  | GSM4626771 | OA |
| GSM4626771_GTATCTTCATAGTAAG-1  | GSM4626771 | OA |
| GSM4626771_GTATCTTCATCCGTGG-1  | GSM4626771 | OA |
| GSM4626771_GTATCTTGTCAGCGA-1   | GSM4626771 | OA |
| GSM4626771_GTATCTTGCTGCCAG-1   | GSM4626771 | OA |
| GSM4626771_GTATCTTGTTAAGGGC-1  | GSM4626771 | OA |
| GSM4626771_GTATCTTTCAGAGGTG-1  | GSM4626771 | OA |
| GSM4626771_GTATCTTTCCTAGTGA-1  | GSM4626771 | OA |
| GSM4626771_GTATTCTAGAGACTAT-1  | GSM4626771 | OA |
| GSM4626771_GTATTCTAGATACACA-1  | GSM4626771 | OA |
| GSM4626771_GTATTCTAGCGTTTAC-1  | GSM4626771 | OA |
| GSM4626771_GTATTCTAGCTACCGC-1  | GSM4626771 | OA |
| GSM4626771_GTATTCTAGTCATGCT-1  | GSM4626771 | OA |
| GSM4626771_GTATTCTAGTTAGCGG-1  | GSM4626771 | OA |
| GSM4626771_GTATTCTGTATAATGG-1  | GSM4626771 | OA |
| GSM4626771_GTATTCTGTACACGC-1   | GSM4626771 | OA |

|                               |            |    |
|-------------------------------|------------|----|
| GSM4626771_GTATTCTGTCTTGTCC-1 | GSM4626771 | OA |
| GSM4626771_GTATTCTGTAAAGTG-1  | GSM4626771 | OA |
| GSM4626771_GTATTCTGTTATCGGT-1 | GSM4626771 | OA |
| GSM4626771_GTATTCTTCCAGGGCT-1 | GSM4626771 | OA |
| GSM4626771_GTATTCTTCCCTCAGT-1 | GSM4626771 | OA |
| GSM4626771_GTCAAGTAGGAATTAC-1 | GSM4626771 | OA |
| GSM4626771_GTCAAGTAGGCGTACA-1 | GSM4626771 | OA |
| GSM4626771_GTCAAGTAGTGGCACA-1 | GSM4626771 | OA |
| GSM4626771_GTCAAGTAGTGGGATC-1 | GSM4626771 | OA |
| GSM4626771_GTCAAGTCACCAACCG-1 | GSM4626771 | OA |
| GSM4626771_GTCAAGTCAGACGCCT-1 | GSM4626771 | OA |
| GSM4626771_GTCAAGTCAGGAATCG-1 | GSM4626771 | OA |
| GSM4626771_GTCAAGTGACCATCA-1  | GSM4626771 | OA |
| GSM4626771_GTCAAGTGTTGAGTTC-1 | GSM4626771 | OA |
| GSM4626771_GTCAAGTTCCTGCTTG-1 | GSM4626771 | OA |
| GSM4626771_GTCAAGTTCGATCCCT-1 | GSM4626771 | OA |
| GSM4626771_GTCACAAAGGTGTGGT-1 | GSM4626771 | OA |
| GSM4626771_GTCACAACAAATTGCC-1 | GSM4626771 | OA |
| GSM4626771_GTCACAACATATGCTG-1 | GSM4626771 | OA |
| GSM4626771_GTCACAATCCCATTTA-1 | GSM4626771 | OA |
| GSM4626771_GTCACAATCCCTTGCA-1 | GSM4626771 | OA |
| GSM4626771_GTCACAATCGTAGGTT-1 | GSM4626771 | OA |
| GSM4626771_GTCACGGAGGGTGTGT-1 | GSM4626771 | OA |
| GSM4626771_GTCACGGAGGTTACCT-1 | GSM4626771 | OA |
| GSM4626771_GTCACGGCAAAGTGTG-1 | GSM4626771 | OA |
| GSM4626771_GTCACGGGTAACGACG-1 | GSM4626771 | OA |
| GSM4626771_GTCACGGGTACAGCAG-1 | GSM4626771 | OA |
| GSM4626771_GTCACGGGTTGGTGGA-1 | GSM4626771 | OA |
| GSM4626771_GTCACGGTCAACACAC-1 | GSM4626771 | OA |
| GSM4626771_GTCACGGTCCACTGGG-1 | GSM4626771 | OA |
| GSM4626771_GTCACGGTCCGTAGGC-1 | GSM4626771 | OA |
| GSM4626771_GTCACGGTCTCCGGTT-1 | GSM4626771 | OA |
| GSM4626771_GTCACGGTCTCTTATG-1 | GSM4626771 | OA |
| GSM4626771_GTCATTTAGCGCCTCA-1 | GSM4626771 | OA |
| GSM4626771_GTCATTTAGCTCAACT-1 | GSM4626771 | OA |
| GSM4626771_GTCATTTAGGACAGAA-1 | GSM4626771 | OA |
| GSM4626771_GTCATTTCAGAAGCAC-1 | GSM4626771 | OA |
| GSM4626771_GTCATTTATTGGTAC-1  | GSM4626771 | OA |
| GSM4626771_GTCATTTGTAAGGGCT-1 | GSM4626771 | OA |
| GSM4626771_GTCATTTGTGCCTTGG-1 | GSM4626771 | OA |
| GSM4626771_GTCATTTTCGAGGTAG-1 | GSM4626771 | OA |
| GSM4626771_GTCCTCAAGAAACCGC-1 | GSM4626771 | OA |
| GSM4626771_GTCCTCAAGATGTTAG-1 | GSM4626771 | OA |
| GSM4626771_GTCCTCACACGCGAAA-1 | GSM4626771 | OA |
| GSM4626771_GTCCTCACATGCAACT-1 | GSM4626771 | OA |
| GSM4626771_GTCCTCAGTAGGCATG-1 | GSM4626771 | OA |
| GSM4626771_GTCCTCAGTCAACATC-1 | GSM4626771 | OA |
| GSM4626771_GTCCTCAGTGAGGCTA-1 | GSM4626771 | OA |
| GSM4626771_GTCCTCAGTTCTGTTT-1 | GSM4626771 | OA |
| GSM4626771_GTCCTCATCAGCCTAA-1 | GSM4626771 | OA |
| GSM4626771_GTCCTCATCGGCTACG-1 | GSM4626771 | OA |
| GSM4626771_GTCCTCATCTCTAAGG-1 | GSM4626771 | OA |
| GSM4626771_GTCCTCATCTTGTATC-1 | GSM4626771 | OA |
| GSM4626771_GTCCTCATCTTTAGGG-1 | GSM4626771 | OA |
| GSM4626771_GTCGGGTAGGAATGGA-1 | GSM4626771 | OA |
| GSM4626771_GTCGGGTCAACTGCGC-1 | GSM4626771 | OA |
| GSM4626771_GTCGGGTGAGCCTATA-1 | GSM4626771 | OA |

|                               |            |    |
|-------------------------------|------------|----|
| GSM4626771_GTCGGGTGTAAAGTCA-1 | GSM4626771 | OA |
| GSM4626771_GTCGGGTGTATAGTAG-1 | GSM4626771 | OA |
| GSM4626771_GTCGGGTGTGTGCGTC-1 | GSM4626771 | OA |
| GSM4626771_GTCGGGTGTTATCCGA-1 | GSM4626771 | OA |
| GSM4626771_GTCGGGTTCATAGCAC-1 | GSM4626771 | OA |
| GSM4626771_GTCGGGTTCCTAGTGA-1 | GSM4626771 | OA |
| GSM4626771_GTCGGGTTCGGTGTTA-1 | GSM4626771 | OA |
| GSM4626771_GTCGTAAAGGACATTA-1 | GSM4626771 | OA |
| GSM4626771_GTCGTAAAGTACGATA-1 | GSM4626771 | OA |
| GSM4626771_GTCGTAACACGAAATA-1 | GSM4626771 | OA |
| GSM4626771_GTCGTAACACGGTTTA-1 | GSM4626771 | OA |
| GSM4626771_GTCGTAACAGGGTTAG-1 | GSM4626771 | OA |
| GSM4626771_GTCGTAACATATACGC-1 | GSM4626771 | OA |
| GSM4626771_GTCGTAATCCTCCTAG-1 | GSM4626771 | OA |
| GSM4626771_GTCTCGTCAAGGACTG-1 | GSM4626771 | OA |
| GSM4626771_GTCTCGTCACACCGAC-1 | GSM4626771 | OA |
| GSM4626771_GTCTCGTCAGGATCGA-1 | GSM4626771 | OA |
| GSM4626771_GTCTCGTCAGGGCATA-1 | GSM4626771 | OA |
| GSM4626771_GTCTCGTCATATGGTC-1 | GSM4626771 | OA |
| GSM4626771_GTCTCGTCATCTACGA-1 | GSM4626771 | OA |
| GSM4626771_GTCTCGTGTGTAATGA-1 | GSM4626771 | OA |
| GSM4626771_GTCTCGTGTTACGACT-1 | GSM4626771 | OA |
| GSM4626771_GTCTCGTGTTATCGGT-1 | GSM4626771 | OA |
| GSM4626771_GTCTCGTGTTGTTTGG-1 | GSM4626771 | OA |
| GSM4626771_GTCTCGTTCCCAAGAT-1 | GSM4626771 | OA |
| GSM4626771_GTCTCGTTCGGATGGA-1 | GSM4626771 | OA |
| GSM4626771_GTCTTCGAGAGGTACC-1 | GSM4626771 | OA |
| GSM4626771_GTCTTCGAGCCATCGC-1 | GSM4626771 | OA |
| GSM4626771_GTCTTCGAGTTGAGTA-1 | GSM4626771 | OA |
| GSM4626771_GTCTTCGCAAGGTTTC-1 | GSM4626771 | OA |
| GSM4626771_GTCTTCGCAGGCTCAC-1 | GSM4626771 | OA |
| GSM4626771_GTCTTCGGTAGCCTCG-1 | GSM4626771 | OA |
| GSM4626771_GTCTTCGGTGACGGTA-1 | GSM4626771 | OA |
| GSM4626771_GTCTTCGGTTAGTGGG-1 | GSM4626771 | OA |
| GSM4626771_GTCTTCGGTTCATGA-1  | GSM4626771 | OA |
| GSM4626771_GTGAAGGAGAACAAC-1  | GSM4626771 | OA |
| GSM4626771_GTGAAGGAGTACTCT-1  | GSM4626771 | OA |
| GSM4626771_GTGAAGGCAAATTGCC-1 | GSM4626771 | OA |
| GSM4626771_GTGAAGGCACAACGT-1  | GSM4626771 | OA |
| GSM4626771_GTGAAGGGTACTCAAC-1 | GSM4626771 | OA |
| GSM4626771_GTGAAGGGTATATGAG-1 | GSM4626771 | OA |
| GSM4626771_GTGAAGGGTGTTGAGG-1 | GSM4626771 | OA |
| GSM4626771_GTGAAGGTCATAAAGG-1 | GSM4626771 | OA |
| GSM4626771_GTGAAGGTCGACGGAA-1 | GSM4626771 | OA |
| GSM4626771_GTGAAGGTCTAAGCCA-1 | GSM4626771 | OA |
| GSM4626771_GTGCAGCCACGAAGCA-1 | GSM4626771 | OA |
| GSM4626771_GTGCAGCCATCGGACC-1 | GSM4626771 | OA |
| GSM4626771_GTGCAGCCATGAGCGA-1 | GSM4626771 | OA |
| GSM4626771_GTGCAGCGTAAGGGAA-1 | GSM4626771 | OA |
| GSM4626771_GTGCAGCGTTCCAACA-1 | GSM4626771 | OA |
| GSM4626771_GTGCAGCGTTGTGGCC-1 | GSM4626771 | OA |
| GSM4626771_GTGCATAAGAATTCCC-1 | GSM4626771 | OA |
| GSM4626771_GTGCATAAGAGTGAGA-1 | GSM4626771 | OA |
| GSM4626771_GTGCATAAGCCGATTT-1 | GSM4626771 | OA |
| GSM4626771_GTGCATAAGGCTCAGA-1 | GSM4626771 | OA |
| GSM4626771_GTGCATACAACGCGA-1  | GSM4626771 | OA |
| GSM4626771_GTGCATACAACGCCA-1  | GSM4626771 | OA |

|                               |            |    |
|-------------------------------|------------|----|
| GSM4626771_GTGCATACAAGCGATG-1 | GSM4626771 | OA |
| GSM4626771_GTGCATACAGATCGGA-1 | GSM4626771 | OA |
| GSM4626771_GTGCATACAGCCTATA-1 | GSM4626771 | OA |
| GSM4626771_GTGCATACAGTCAGAG-1 | GSM4626771 | OA |
| GSM4626771_GTGCATAGTACAAGTA-1 | GSM4626771 | OA |
| GSM4626771_GTGCATAGTACGCTGC-1 | GSM4626771 | OA |
| GSM4626771_GTGCATAGTATAATGG-1 | GSM4626771 | OA |
| GSM4626771_GTGCATATCATGTCTT-1 | GSM4626771 | OA |
| GSM4626771_GTGCATATCCTTAATC-1 | GSM4626771 | OA |
| GSM4626771_GTGCGGTAGCCGCCTA-1 | GSM4626771 | OA |
| GSM4626771_GTGCGGTCAAATTGCC-1 | GSM4626771 | OA |
| GSM4626771_GTGCGGTCAAGCCAC-1  | GSM4626771 | OA |
| GSM4626771_GTGCGGTGTCCAGTGC-1 | GSM4626771 | OA |
| GSM4626771_GTGCGGTGTTACTGAC-1 | GSM4626771 | OA |
| GSM4626771_GTGCGGTTCAGCACAT-1 | GSM4626771 | OA |
| GSM4626771_GTGCTTCAGACTAGAT-1 | GSM4626771 | OA |
| GSM4626771_GTGCTTCAGATGTAAC-1 | GSM4626771 | OA |
| GSM4626771_GTGCTTCAGATTACCC-1 | GSM4626771 | OA |
| GSM4626771_GTGCTTCAGTAGCGGT-1 | GSM4626771 | OA |
| GSM4626771_GTGCTTCCAAACCTAC-1 | GSM4626771 | OA |
| GSM4626771_GTGCTTCCAAACTGCT-1 | GSM4626771 | OA |
| GSM4626771_GTGCTTCCAAGAGTCG-1 | GSM4626771 | OA |
| GSM4626771_GTGCTTCCACGTAAGG-1 | GSM4626771 | OA |
| GSM4626771_GTGCTTCCAGACGCCT-1 | GSM4626771 | OA |
| GSM4626771_GTGCTTCCATGGTCTA-1 | GSM4626771 | OA |
| GSM4626771_GTGCTTCTCAGTCCCT-1 | GSM4626771 | OA |
| GSM4626771_GTGCTTCTCCTCTAGC-1 | GSM4626771 | OA |
| GSM4626771_GTGCTTCTCTCCTATA-1 | GSM4626771 | OA |
| GSM4626771_GTGGGTCAGACGACGT-1 | GSM4626771 | OA |
| GSM4626771_GTGGGTCAGCTGCCCA-1 | GSM4626771 | OA |
| GSM4626771_GTGGGTCCAATAACGA-1 | GSM4626771 | OA |
| GSM4626771_GTGGGTCGTGGAAGA-1  | GSM4626771 | OA |
| GSM4626771_GTGGGTCTCTATCGCC-1 | GSM4626771 | OA |
| GSM4626771_GTGGGTCTCTCGTTTA-1 | GSM4626771 | OA |
| GSM4626771_GTGTGCGAGCAATCTC-1 | GSM4626771 | OA |
| GSM4626771_GTGTGCGAGGTACTCT-1 | GSM4626771 | OA |
| GSM4626771_GTGTGCGAGTTAGCGG-1 | GSM4626771 | OA |
| GSM4626771_GTGTGCGCATCCCATC-1 | GSM4626771 | OA |
| GSM4626771_GTGTGCGGTATAGGTA-1 | GSM4626771 | OA |
| GSM4626771_GTGTGCGGTCTCTTG-1  | GSM4626771 | OA |
| GSM4626771_GTGTGCGGTCTACCTC-1 | GSM4626771 | OA |
| GSM4626771_GTGTGCGTCAGCACAT-1 | GSM4626771 | OA |
| GSM4626771_GTGTGCGTCAGTTCGA-1 | GSM4626771 | OA |
| GSM4626771_GTGTTAGAGACACTAA-1 | GSM4626771 | OA |
| GSM4626771_GTGTTAGAGACTGGGT-1 | GSM4626771 | OA |
| GSM4626771_GTGTTAGAGCAGATCG-1 | GSM4626771 | OA |
| GSM4626771_GTGTTAGAGCGATCCC-1 | GSM4626771 | OA |
| GSM4626771_GTGTTAGAGGTACTCT-1 | GSM4626771 | OA |
| GSM4626771_GTGTTAGAGTAGGTGC-1 | GSM4626771 | OA |
| GSM4626771_GTGTTAGCAGACTCGC-1 | GSM4626771 | OA |
| GSM4626771_GTGTTAGCAGGTCGTC-1 | GSM4626771 | OA |
| GSM4626771_GTGTTAGGTATTCTCT-1 | GSM4626771 | OA |
| GSM4626771_GTGTTAGGTTCGGGCT-1 | GSM4626771 | OA |
| GSM4626771_GTGTTAGTCCATTCTA-1 | GSM4626771 | OA |
| GSM4626771_GTTAAGCAGACAGACC-1 | GSM4626771 | OA |
| GSM4626771_GTTAAGCAGTCCAGGA-1 | GSM4626771 | OA |
| GSM4626771_GTTAAGCCAAGTACCT-1 | GSM4626771 | OA |

|                                |            |    |
|--------------------------------|------------|----|
| GSM4626771_GTTAAGCCACGGCGTT-1  | GSM4626771 | OA |
| GSM4626771_GTTAAGCCAGGTTTCA-1  | GSM4626771 | OA |
| GSM4626771_GTTAAGCGTATCGCAT-1  | GSM4626771 | OA |
| GSM4626771_GTTAAGCGTCACACGC-1  | GSM4626771 | OA |
| GSM4626771_GTTAAGCGTCTAGAGG-1  | GSM4626771 | OA |
| GSM4626771_GTTAAGCGTTAAAGAC-1  | GSM4626771 | OA |
| GSM4626771_GTTAAGCTCACAGTAC-1  | GSM4626771 | OA |
| GSM4626771_GTTAAGCTCCTGCCAT-1  | GSM4626771 | OA |
| GSM4626771_GTTAAGCTCGGAATCT-1  | GSM4626771 | OA |
| GSM4626771_GTTACAGAGGAGTACC-1  | GSM4626771 | OA |
| GSM4626771_GTTACAGCAGCCAATT-1  | GSM4626771 | OA |
| GSM4626771_GTTACAGGTATAAACG-1  | GSM4626771 | OA |
| GSM4626771_GTTACAGGTCTTCAAG-1  | GSM4626771 | OA |
| GSM4626771_GTTACAGGTGTCGCTG-1  | GSM4626771 | OA |
| GSM4626771_GTTACAGGTGTTGGGA-1  | GSM4626771 | OA |
| GSM4626771_GTTACAGTCACCATAG-1  | GSM4626771 | OA |
| GSM4626771_GTTACAGTCCAGATCA-1  | GSM4626771 | OA |
| GSM4626771_GTTACAGTCTACTCAT-1  | GSM4626771 | OA |
| GSM4626771_GTTACAGTCTCTAAGG-1  | GSM4626771 | OA |
| GSM4626771_GTTCATTAGATGCCAG-1  | GSM4626771 | OA |
| GSM4626771_GTTCATTAGCCAGAAC-1  | GSM4626771 | OA |
| GSM4626771_GTTCATTAGGCGATAC-1  | GSM4626771 | OA |
| GSM4626771_GTTCATTAGTGTTAGA-1  | GSM4626771 | OA |
| GSM4626771_GTTCATTCACTTGGAT-1  | GSM4626771 | OA |
| GSM4626771_GTTCATTCACTTCTAC-1  | GSM4626771 | OA |
| GSM4626771_GTTCATTGTACATCCA-1  | GSM4626771 | OA |
| GSM4626771_GTTCATTGTAGCCTAT-1  | GSM4626771 | OA |
| GSM4626771_GTTCCGGGAGACCTTTG-1 | GSM4626771 | OA |
| GSM4626771_GTTCCGGGAGCCTATGT-1 | GSM4626771 | OA |
| GSM4626771_GTTCCGGGCAATCACAC-1 | GSM4626771 | OA |
| GSM4626771_GTTCCGGGCAGCGTTCG-1 | GSM4626771 | OA |
| GSM4626771_GTTCCGGGGTCGAGTTT-1 | GSM4626771 | OA |
| GSM4626771_GTTCCGGGGTCTCCCTA-1 | GSM4626771 | OA |
| GSM4626771_GTTCCGGGGTTATCCGA-1 | GSM4626771 | OA |
| GSM4626771_GTTCCGGGGTTATGCGT-1 | GSM4626771 | OA |
| GSM4626771_GTTCCGGGGTTCAACCA-1 | GSM4626771 | OA |
| GSM4626771_GTTCCGGGTCAATCTCT-1 | GSM4626771 | OA |
| GSM4626771_GTTCCGGGTCCCATTTA-1 | GSM4626771 | OA |
| GSM4626771_GTTCTCGAGAACTGTA-1  | GSM4626771 | OA |
| GSM4626771_GTTCTCGCACCCAGTG-1  | GSM4626771 | OA |
| GSM4626771_GTTCTCGCAGATGGGT-1  | GSM4626771 | OA |
| GSM4626771_GTTCTCGCATGATCCA-1  | GSM4626771 | OA |
| GSM4626771_GTTCTCGGTCGAGATG-1  | GSM4626771 | OA |
| GSM4626771_GTTCTCGGTTATCGGT-1  | GSM4626771 | OA |
| GSM4626771_GTTTCTAAGCTGCCCA-1  | GSM4626771 | OA |
| GSM4626771_GTTTCTAAGGACAGAA-1  | GSM4626771 | OA |
| GSM4626771_GTTTCTAAGGAGTAGA-1  | GSM4626771 | OA |
| GSM4626771_GTTTCTACATGCCTAA-1  | GSM4626771 | OA |
| GSM4626771_GTTTCTAGTAAGGGCT-1  | GSM4626771 | OA |
| GSM4626771_GTTTCTAGTCCAAGTT-1  | GSM4626771 | OA |
| GSM4626771_GTTTCTAGTTGGTAAA-1  | GSM4626771 | OA |
| GSM4626771_GTTTCTATCCCTAATT-1  | GSM4626771 | OA |
| GSM4626771_GTTTCTATCCTAGTGA-1  | GSM4626771 | OA |
| GSM4626771_GTTTCTATCGTACCGG-1  | GSM4626771 | OA |
| GSM4626771_GTTTCTATCTATGTGG-1  | GSM4626771 | OA |
| GSM4626771_GTTTCTATCTGAGTGT-1  | GSM4626771 | OA |
| GSM4626771_TAAACCGAGAATTGTG-1  | GSM4626771 | OA |



|                                |            |    |
|--------------------------------|------------|----|
| GSM4626771_TAAACCGAGACTAGAT-1  | GSM4626771 | OA |
| GSM4626771_TAAACCGAGGCATGTG-1  | GSM4626771 | OA |
| GSM4626771_TAAACCGAGTTTCCTT-1  | GSM4626771 | OA |
| GSM4626771_TAAACCGCAGCTGTGC-1  | GSM4626771 | OA |
| GSM4626771_TAAACCGGTACAGTTC-1  | GSM4626771 | OA |
| GSM4626771_TAAACCGGTACCGTTA-1  | GSM4626771 | OA |
| GSM4626771_TAAACCGGTGTATGGG-1  | GSM4626771 | OA |
| GSM4626771_TAAACCGTCAGTTGAC-1  | GSM4626771 | OA |
| GSM4626771_TAAACCGTCATGTCTT-1  | GSM4626771 | OA |
| GSM4626771_TAAACCGTCCATGCTC-1  | GSM4626771 | OA |
| GSM4626771_TAAACCGTCCTCAACC-1  | GSM4626771 | OA |
| GSM4626771_TAAACCGTCGGTGTGCG-1 | GSM4626771 | OA |
| GSM4626771_TAAGAGAAGTTGTAGA-1  | GSM4626771 | OA |
| GSM4626771_TAAGAGACAAACTGCT-1  | GSM4626771 | OA |
| GSM4626771_TAAGAGACAAAGGCGT-1  | GSM4626771 | OA |
| GSM4626771_TAAGAGACATTCCTCG-1  | GSM4626771 | OA |
| GSM4626771_TAAGAGACATTGACA-1   | GSM4626771 | OA |
| GSM4626771_TAAGAGATCCCGACTT-1  | GSM4626771 | OA |
| GSM4626771_TAAGAGATCCTGTAGA-1  | GSM4626771 | OA |
| GSM4626771_TAAGCGTAGCCCTAAT-1  | GSM4626771 | OA |
| GSM4626771_TAAGCGTAGCTAGTCT-1  | GSM4626771 | OA |
| GSM4626771_TAAGCGTAGTACCGGA-1  | GSM4626771 | OA |
| GSM4626771_TAAGCGGTAAACGTTT-1  | GSM4626771 | OA |
| GSM4626771_TAAGCGGTACATGTC-1   | GSM4626771 | OA |
| GSM4626771_TAAGCGGTAGAAGGA-1   | GSM4626771 | OA |
| GSM4626771_TAAGCGGTGAAGGCT-1   | GSM4626771 | OA |
| GSM4626771_TAAGTGCAGTGACATA-1  | GSM4626771 | OA |
| GSM4626771_TAAGTGCCAACTGCT-1   | GSM4626771 | OA |
| GSM4626771_TAAGTGCCACCAGTTA-1  | GSM4626771 | OA |
| GSM4626771_TAAGTGCCATAAAGGT-1  | GSM4626771 | OA |
| GSM4626771_TAAGTGCCATCTACGA-1  | GSM4626771 | OA |
| GSM4626771_TAAGTGCGTAGCTCCG-1  | GSM4626771 | OA |
| GSM4626771_TAAGTGCGTCATGCCG-1  | GSM4626771 | OA |
| GSM4626771_TAAGTGCTCACGCGGT-1  | GSM4626771 | OA |
| GSM4626771_TAAGTGCTCATTATCC-1  | GSM4626771 | OA |
| GSM4626771_TAAGTGCTCCAACTG-1   | GSM4626771 | OA |
| GSM4626771_TACACGAAGAGGGATA-1  | GSM4626771 | OA |
| GSM4626771_TACACGACAATGGTCT-1  | GSM4626771 | OA |
| GSM4626771_TACACGACAGGACCCT-1  | GSM4626771 | OA |
| GSM4626771_TACACGACAGTAAGCG-1  | GSM4626771 | OA |
| GSM4626771_TACACGACATAAGACA-1  | GSM4626771 | OA |
| GSM4626771_TACACGAGTATAAACG-1  | GSM4626771 | OA |
| GSM4626771_TACACGAGTCACACGC-1  | GSM4626771 | OA |
| GSM4626771_TACACGAGTCCGAATT-1  | GSM4626771 | OA |
| GSM4626771_TACACGAGTCTAGCCG-1  | GSM4626771 | OA |
| GSM4626771_TACACGATCAACGAAA-1  | GSM4626771 | OA |
| GSM4626771_TACACGATCAACGGCC-1  | GSM4626771 | OA |
| GSM4626771_TACACGATCCAGTAGT-1  | GSM4626771 | OA |
| GSM4626771_TACACGATCCCTTGCA-1  | GSM4626771 | OA |
| GSM4626771_TACAGTGAGCAGCGTA-1  | GSM4626771 | OA |
| GSM4626771_TACAGTGAGCCGCCTA-1  | GSM4626771 | OA |
| GSM4626771_TACAGTGAGTGGTCCC-1  | GSM4626771 | OA |
| GSM4626771_TACAGTGCATGAACCT-1  | GSM4626771 | OA |
| GSM4626771_TACAGTGGTAACGACG-1  | GSM4626771 | OA |
| GSM4626771_TACAGTGGTAGGCATG-1  | GSM4626771 | OA |
| GSM4626771_TACAGTGGTTAAGATG-1  | GSM4626771 | OA |
| GSM4626771_TACCTATAGACATAAC-1  | GSM4626771 | OA |

|                                |            |    |
|--------------------------------|------------|----|
| GSM4626771_TACCTATAGCTTATCG-1  | GSM4626771 | OA |
| GSM4626771_TACCTATCACAGCGTC-1  | GSM4626771 | OA |
| GSM4626771_TACCTATCATCACGTA-1  | GSM4626771 | OA |
| GSM4626771_TACCTATCATGAGCGA-1  | GSM4626771 | OA |
| GSM4626771_TACCTATGTGTTGGGA-1  | GSM4626771 | OA |
| GSM4626771_TACCTTAAGAATTCCC-1  | GSM4626771 | OA |
| GSM4626771_TACCTTAAGATATACG-1  | GSM4626771 | OA |
| GSM4626771_TACCTTAAGCTCCCAG-1  | GSM4626771 | OA |
| GSM4626771_TACCTTACACTACAGT-1  | GSM4626771 | OA |
| GSM4626771_TACCTTACAGGTCGTC-1  | GSM4626771 | OA |
| GSM4626771_TACCTTAGTAAACGCG-1  | GSM4626771 | OA |
| GSM4626771_TACCTTAGTTACGCGC-1  | GSM4626771 | OA |
| GSM4626771_TACCTTAGTTCTCATT-1  | GSM4626771 | OA |
| GSM4626771_TACCTTATCACATACG-1  | GSM4626771 | OA |
| GSM4626771_TACGGATAGAGGTTGC-1  | GSM4626771 | OA |
| GSM4626771_TACGGATAGCAGCCTC-1  | GSM4626771 | OA |
| GSM4626771_TACGGATAGCTATGCT-1  | GSM4626771 | OA |
| GSM4626771_TACGGATAGGCAAAGA-1  | GSM4626771 | OA |
| GSM4626771_TACGGATAGGTGTGGT-1  | GSM4626771 | OA |
| GSM4626771_TACGGATCAAAGCGGT-1  | GSM4626771 | OA |
| GSM4626771_TACGGATCAACGCACC-1  | GSM4626771 | OA |
| GSM4626771_TACGGATCATATACCG-1  | GSM4626771 | OA |
| GSM4626771_TACGGATCATCTCCCA-1  | GSM4626771 | OA |
| GSM4626771_TACGGATGTCTCCACT-1  | GSM4626771 | OA |
| GSM4626771_TACGGATGTGGTAACG-1  | GSM4626771 | OA |
| GSM4626771_TACGGATTCCGAATGT-1  | GSM4626771 | OA |
| GSM4626771_TACGGATTCCGAGCCA-1  | GSM4626771 | OA |
| GSM4626771_TACGGATTCCCTAAGTG-1 | GSM4626771 | OA |
| GSM4626771_TACGGATTCCGGTGTTA-1 | GSM4626771 | OA |
| GSM4626771_TACGGGCAGCCCGAAA-1  | GSM4626771 | OA |
| GSM4626771_TACGGGCAGGGAGTAA-1  | GSM4626771 | OA |
| GSM4626771_TACGGGCAGGTGCTTT-1  | GSM4626771 | OA |
| GSM4626771_TACGGGCAGTCCCACG-1  | GSM4626771 | OA |
| GSM4626771_TACGGGCAGTTAGCGG-1  | GSM4626771 | OA |
| GSM4626771_TACGGGCCAAGACGTG-1  | GSM4626771 | OA |
| GSM4626771_TACGGGCCACCGAATT-1  | GSM4626771 | OA |
| GSM4626771_TACGGGCCAGCTGTAT-1  | GSM4626771 | OA |
| GSM4626771_TACGGGCCATCTCCCA-1  | GSM4626771 | OA |
| GSM4626771_TACGGGCGTAGTGAAT-1  | GSM4626771 | OA |
| GSM4626771_TACGGGCGTCTGCAAT-1  | GSM4626771 | OA |
| GSM4626771_TACGGGCGTTAGATGA-1  | GSM4626771 | OA |
| GSM4626771_TACGGGCTCATCTGCC-1  | GSM4626771 | OA |
| GSM4626771_TACGGGCTCCCGGATG-1  | GSM4626771 | OA |
| GSM4626771_TACGGTAAGGTGCAAC-1  | GSM4626771 | OA |
| GSM4626771_TACGGTAGTCCGTGAC-1  | GSM4626771 | OA |
| GSM4626771_TACGGTATCACAGTAC-1  | GSM4626771 | OA |
| GSM4626771_TACTCATAGATCCTGT-1  | GSM4626771 | OA |
| GSM4626771_TACTCATAGCGTGTCC-1  | GSM4626771 | OA |
| GSM4626771_TACTCATAGTGAACGC-1  | GSM4626771 | OA |
| GSM4626771_TACTCATCAACACGCC-1  | GSM4626771 | OA |
| GSM4626771_TACTCATCAAGCCGCT-1  | GSM4626771 | OA |
| GSM4626771_TACTCATCAAGTAGTA-1  | GSM4626771 | OA |
| GSM4626771_TACTCATCACGGACAA-1  | GSM4626771 | OA |
| GSM4626771_TACTCATCACGGCCAT-1  | GSM4626771 | OA |
| GSM4626771_TACTCATCACTCAGGC-1  | GSM4626771 | OA |
| GSM4626771_TACTCATCATAAAGGT-1  | GSM4626771 | OA |
| GSM4626771_TACTCATGTAAGTGCC-1  | GSM4626771 | OA |

|                                |            |    |
|--------------------------------|------------|----|
| GSM4626771_TACTCATGTCGCTTCT-1  | GSM4626771 | OA |
| GSM4626771_TACTCATGTCTCGTTC-1  | GSM4626771 | OA |
| GSM4626771_TACTCATGTCTGCAAT-1  | GSM4626771 | OA |
| GSM4626771_TACTCATGTGCGATAG-1  | GSM4626771 | OA |
| GSM4626771_TACTCATTCCAATGGT-1  | GSM4626771 | OA |
| GSM4626771_TACTCGCAGCAGGCTA-1  | GSM4626771 | OA |
| GSM4626771_TACTCGCAGCTAAGAT-1  | GSM4626771 | OA |
| GSM4626771_TACTCGCCATTATCTC-1  | GSM4626771 | OA |
| GSM4626771_TACTCGCCATTCTGC-1   | GSM4626771 | OA |
| GSM4626771_TACTCGCGTTCGTCTC-1  | GSM4626771 | OA |
| GSM4626771_TACTCGCTCAATCACG-1  | GSM4626771 | OA |
| GSM4626771_TACTCGCTCCTTTCGG-1  | GSM4626771 | OA |
| GSM4626771_TACTTACAGCCTATGT-1  | GSM4626771 | OA |
| GSM4626771_TACTTACAGCTTATCG-1  | GSM4626771 | OA |
| GSM4626771_TACTTACAGTGTACGG-1  | GSM4626771 | OA |
| GSM4626771_TACTTACAGTGTCCCG-1  | GSM4626771 | OA |
| GSM4626771_TACTTACCAAGGCTCC-1  | GSM4626771 | OA |
| GSM4626771_TACTTACCATCCGCGA-1  | GSM4626771 | OA |
| GSM4626771_TACTTACGTAACGTTT-1  | GSM4626771 | OA |
| GSM4626771_TACTTACGTATGAAAC-1  | GSM4626771 | OA |
| GSM4626771_TACTTACGTGCACGAA-1  | GSM4626771 | OA |
| GSM4626771_TACTTACGTGTTGGGA-1  | GSM4626771 | OA |
| GSM4626771_TACTTACTCGAGGTAG-1  | GSM4626771 | OA |
| GSM4626771_TACTTACTCGCGGATC-1  | GSM4626771 | OA |
| GSM4626771_TACTTACTCGCGTAGC-1  | GSM4626771 | OA |
| GSM4626771_TACTTACTCGTAGATC-1  | GSM4626771 | OA |
| GSM4626771_TACTTACTCTTAGCCC-1  | GSM4626771 | OA |
| GSM4626771_TACTTGTAGACGCAAC-1  | GSM4626771 | OA |
| GSM4626771_TACTTGTAGAGCCTAG-1  | GSM4626771 | OA |
| GSM4626771_TACTTGTAGCCACCTG-1  | GSM4626771 | OA |
| GSM4626771_TACTTGTAGTGTACCT-1  | GSM4626771 | OA |
| GSM4626771_TACTTGTCAAAGTGCG-1  | GSM4626771 | OA |
| GSM4626771_TACTTGTCAATGCCAT-1  | GSM4626771 | OA |
| GSM4626771_TACTTGTACACATGT-1   | GSM4626771 | OA |
| GSM4626771_TACTTGTACCCGAAAG-1  | GSM4626771 | OA |
| GSM4626771_TACTTGTATGTTCCC-1   | GSM4626771 | OA |
| GSM4626771_TACTTGTGTAGGCATG-1  | GSM4626771 | OA |
| GSM4626771_TACTTGTGTGCTTGTA-1  | GSM4626771 | OA |
| GSM4626771_TACTTGTGTTTCCACC-1  | GSM4626771 | OA |
| GSM4626771_TACTTGTTC AATACCG-1 | GSM4626771 | OA |
| GSM4626771_TACTTGTTCAGTGTTG-1  | GSM4626771 | OA |
| GSM4626771_TACTTGTTCGCGCAA-1   | GSM4626771 | OA |
| GSM4626771_TACTTGTTCCTTGCCGT-1 | GSM4626771 | OA |
| GSM4626771_TAGACCAAGTTGAGAT-1  | GSM4626771 | OA |
| GSM4626771_TAGACCAGTGATGCC-1   | GSM4626771 | OA |
| GSM4626771_TAGACCATCCACTGGG-1  | GSM4626771 | OA |
| GSM4626771_TAGACCATCGAGGTAG-1  | GSM4626771 | OA |
| GSM4626771_TAGAGCTAGACAGACC-1  | GSM4626771 | OA |
| GSM4626771_TAGAGCTAGGAGCGAG-1  | GSM4626771 | OA |
| GSM4626771_TAGAGCTAGTAAGTAC-1  | GSM4626771 | OA |
| GSM4626771_TAGAGCTAGTGAATTG-1  | GSM4626771 | OA |
| GSM4626771_TAGAGCTAGTGCCAGA-1  | GSM4626771 | OA |
| GSM4626771_TAGAGCTAGTGCCACA-1  | GSM4626771 | OA |
| GSM4626771_TAGAGCTCAAGCTGGA-1  | GSM4626771 | OA |
| GSM4626771_TAGAGCTACCGCTAG-1   | GSM4626771 | OA |
| GSM4626771_TAGAGCTACTATCTT-1   | GSM4626771 | OA |
| GSM4626771_TAGAGCTCATCCAACA-1  | GSM4626771 | OA |

|                                |            |    |
|--------------------------------|------------|----|
| GSM4626771_TAGAGCTCATCGACGC-1  | GSM4626771 | OA |
| GSM4626771_TAGAGCTGTCAACATC-1  | GSM4626771 | OA |
| GSM4626771_TAGAGCTGTGGCTCCA-1  | GSM4626771 | OA |
| GSM4626771_TAGAGCTTCAAGAAGT-1  | GSM4626771 | OA |
| GSM4626771_TAGAGCTTCAGCGATT-1  | GSM4626771 | OA |
| GSM4626771_TAGAGCTTCGCCCTTA-1  | GSM4626771 | OA |
| GSM4626771_TAGAGCTTCTATGTGG-1  | GSM4626771 | OA |
| GSM4626771_TAGAGCTTCTTTACGT-1  | GSM4626771 | OA |
| GSM4626771_TAGCCGGAGACAAAGG-1  | GSM4626771 | OA |
| GSM4626771_TAGCCGGAGGAATGGA-1  | GSM4626771 | OA |
| GSM4626771_TAGCCGGCACAGGAGT-1  | GSM4626771 | OA |
| GSM4626771_TAGCCGGCACATCTTT-1  | GSM4626771 | OA |
| GSM4626771_TAGCCGGCAGCGTTCG-1  | GSM4626771 | OA |
| GSM4626771_TAGCCGGCATAACAGCT-1 | GSM4626771 | OA |
| GSM4626771_TAGCCGGTCCAGAGGA-1  | GSM4626771 | OA |
| GSM4626771_TAGCCGGTCCGCATGGC-1 | GSM4626771 | OA |
| GSM4626771_TAGCCGGTCTCGGACG-1  | GSM4626771 | OA |
| GSM4626771_TAGCCGGTCTTACCTA-1  | GSM4626771 | OA |
| GSM4626771_TAGGCATAGACCTTTG-1  | GSM4626771 | OA |
| GSM4626771_TAGGCATAGCAGCGTA-1  | GSM4626771 | OA |
| GSM4626771_TAGGCATAGTAGGCCA-1  | GSM4626771 | OA |
| GSM4626771_TAGGCATCAAGAGTCG-1  | GSM4626771 | OA |
| GSM4626771_TAGGCATCAAGCCATT-1  | GSM4626771 | OA |
| GSM4626771_TAGGCATCAGCTATTG-1  | GSM4626771 | OA |
| GSM4626771_TAGGCATCATACGCCG-1  | GSM4626771 | OA |
| GSM4626771_TAGGCATGTAAGAGGA-1  | GSM4626771 | OA |
| GSM4626771_TAGGCATGTATAGTAG-1  | GSM4626771 | OA |
| GSM4626771_TAGGCATTACAGTAC-1   | GSM4626771 | OA |
| GSM4626771_TAGGCATTTCGATCCCT-1 | GSM4626771 | OA |
| GSM4626771_TAGGCATTTCGATGAGG-1 | GSM4626771 | OA |
| GSM4626771_TAGTGGTAGAAACGAG-1  | GSM4626771 | OA |
| GSM4626771_TAGTGGTAGATGTTAG-1  | GSM4626771 | OA |
| GSM4626771_TAGTGGTAGCAGACTG-1  | GSM4626771 | OA |
| GSM4626771_TAGTGGTAGTTGTAGA-1  | GSM4626771 | OA |
| GSM4626771_TAGTGGTAGTTTCCTT-1  | GSM4626771 | OA |
| GSM4626771_TAGTGGTCAATGTAAG-1  | GSM4626771 | OA |
| GSM4626771_TAGTGGTCACAGATTC-1  | GSM4626771 | OA |
| GSM4626771_TAGTGGTCACGTAAGG-1  | GSM4626771 | OA |
| GSM4626771_TAGTGGTCACTTAAGC-1  | GSM4626771 | OA |
| GSM4626771_TAGTGGTCATATACCG-1  | GSM4626771 | OA |
| GSM4626771_TAGTGGTGTCCGTTAA-1  | GSM4626771 | OA |
| GSM4626771_TAGTGGTGTCTTCAAG-1  | GSM4626771 | OA |
| GSM4626771_TAGTGGTTCGGTCTAA-1  | GSM4626771 | OA |
| GSM4626771_TAGTTGGAGCGCTTAT-1  | GSM4626771 | OA |
| GSM4626771_TAGTTGGAGCTAGTCT-1  | GSM4626771 | OA |
| GSM4626771_TAGTTGGCACAACTGT-1  | GSM4626771 | OA |
| GSM4626771_TAGTTGGCACACCAG-1   | GSM4626771 | OA |
| GSM4626771_TAGTTGGCACGCCAT-1   | GSM4626771 | OA |
| GSM4626771_TAGTTGGCAGGTGCCT-1  | GSM4626771 | OA |
| GSM4626771_TAGTTGGGTCAAAGCG-1  | GSM4626771 | OA |
| GSM4626771_TAGTTGGGTCAACATC-1  | GSM4626771 | OA |
| GSM4626771_TAGTTGGGTCAAGTGA-1  | GSM4626771 | OA |
| GSM4626771_TAGTTGGGTCCGTTAA-1  | GSM4626771 | OA |
| GSM4626771_TAGTTGGGTGACGGTA-1  | GSM4626771 | OA |
| GSM4626771_TAGTTGGGTTCCCTTG-1  | GSM4626771 | OA |
| GSM4626771_TAGTTGGTCAACGCTA-1  | GSM4626771 | OA |
| GSM4626771_TATCAGGAGACAGACC-1  | GSM4626771 | OA |

|                                |            |    |
|--------------------------------|------------|----|
| GSM4626771_TATCAGGCACCGATAT-1  | GSM4626771 | OA |
| GSM4626771_TATCAGGCACGGTTTA-1  | GSM4626771 | OA |
| GSM4626771_TATCAGGCATGTTGAC-1  | GSM4626771 | OA |
| GSM4626771_TATCAGGGTAACGCGA-1  | GSM4626771 | OA |
| GSM4626771_TATCAGGGTACGAAAT-1  | GSM4626771 | OA |
| GSM4626771_TATCAGGGTCATATCG-1  | GSM4626771 | OA |
| GSM4626771_TATCAGGTCTTAACCT-1  | GSM4626771 | OA |
| GSM4626771_TATCTCAAGAAACCTA-1  | GSM4626771 | OA |
| GSM4626771_TATCTCAAGACACTAA-1  | GSM4626771 | OA |
| GSM4626771_TATCTCAAGCCAGGAT-1  | GSM4626771 | OA |
| GSM4626771_TATCTCAAGCCAGTAG-1  | GSM4626771 | OA |
| GSM4626771_TATCTCAAGCCTTGAT-1  | GSM4626771 | OA |
| GSM4626771_TATCTCAAGCTGATAA-1  | GSM4626771 | OA |
| GSM4626771_TATCTCAAGCTGCCCA-1  | GSM4626771 | OA |
| GSM4626771_TATCTCAGTAGCTCCG-1  | GSM4626771 | OA |
| GSM4626771_TATCTCAGTTCGCTAA-1  | GSM4626771 | OA |
| GSM4626771_TATCTCATCCACGTTT-1  | GSM4626771 | OA |
| GSM4626771_TATCTCATCCATGAGT-1  | GSM4626771 | OA |
| GSM4626771_TATCTCATCTGTACGA-1  | GSM4626771 | OA |
| GSM4626771_TATGCCCAGAATTGTG-1  | GSM4626771 | OA |
| GSM4626771_TATGCCCCAGTGACAG-1  | GSM4626771 | OA |
| GSM4626771_TATGCCCTCAAACCAC-1  | GSM4626771 | OA |
| GSM4626771_TATGCCCTCCGCATCT-1  | GSM4626771 | OA |
| GSM4626771_TATGCCCTCCGCTGTT-1  | GSM4626771 | OA |
| GSM4626771_TATTACCAGATGGCGT-1  | GSM4626771 | OA |
| GSM4626771_TATTACCAGGACACCA-1  | GSM4626771 | OA |
| GSM4626771_TATTACCAGGCAAAGA-1  | GSM4626771 | OA |
| GSM4626771_TATTACCCAACGCACC-1  | GSM4626771 | OA |
| GSM4626771_TATTACCCACATTTCT-1  | GSM4626771 | OA |
| GSM4626771_TATTACCCACCAGATT-1  | GSM4626771 | OA |
| GSM4626771_TATTACCGTCGTTGTA-1  | GSM4626771 | OA |
| GSM4626771_TATTACCGTCTTCAAG-1  | GSM4626771 | OA |
| GSM4626771_TATTACCTCCAAGCCG-1  | GSM4626771 | OA |
| GSM4626771_TATTACCTCCCAGGTG-1  | GSM4626771 | OA |
| GSM4626771_TATTACCTCGAATGCT-1  | GSM4626771 | OA |
| GSM4626771_TATTACCTCGGTTCCGG-1 | GSM4626771 | OA |
| GSM4626771_TATTACCTCTGTTTGT-1  | GSM4626771 | OA |
| GSM4626771_TATTACCTCTTAGCCC-1  | GSM4626771 | OA |
| GSM4626771_TCAACGAAGAGTGAGA-1  | GSM4626771 | OA |
| GSM4626771_TCAACGAAGCGTAGTG-1  | GSM4626771 | OA |
| GSM4626771_TCAACGACAAAGCGGT-1  | GSM4626771 | OA |
| GSM4626771_TCAACGACAAGCCTAT-1  | GSM4626771 | OA |
| GSM4626771_TCAACGACAAGTAGTA-1  | GSM4626771 | OA |
| GSM4626771_TCAACGACAATGGAAT-1  | GSM4626771 | OA |
| GSM4626771_TCAACGACACTAAGTC-1  | GSM4626771 | OA |
| GSM4626771_TCAACGACATTCACCT-1  | GSM4626771 | OA |
| GSM4626771_TCAACGAGTTATCGGT-1  | GSM4626771 | OA |
| GSM4626771_TCAATCTAGTTCCACA-1  | GSM4626771 | OA |
| GSM4626771_TCAATCTCAATCTACG-1  | GSM4626771 | OA |
| GSM4626771_TCAATCTCACCGATAT-1  | GSM4626771 | OA |
| GSM4626771_TCAATCTGTCCAAGTT-1  | GSM4626771 | OA |
| GSM4626771_TCAATCTTCAAAAACC-1  | GSM4626771 | OA |
| GSM4626771_TCAATCTTCTGTCTCG-1  | GSM4626771 | OA |
| GSM4626771_TCACAAGAGACAATAC-1  | GSM4626771 | OA |
| GSM4626771_TCACAAGAGAGGGATA-1  | GSM4626771 | OA |
| GSM4626771_TCACAAGAGCCCAATT-1  | GSM4626771 | OA |
| GSM4626771_TCACAAGAGTGATCGG-1  | GSM4626771 | OA |

|                               |            |    |
|-------------------------------|------------|----|
| GSM4626771_TCACAAGCAAAGTGCG-1 | GSM4626771 | OA |
| GSM4626771_TCACAAGCAACACCCG-1 | GSM4626771 | OA |
| GSM4626771_TCACAAGCACGTAAGG-1 | GSM4626771 | OA |
| GSM4626771_TCACAAGCAGATCTGT-1 | GSM4626771 | OA |
| GSM4626771_TCACAAGGTATGAATG-1 | GSM4626771 | OA |
| GSM4626771_TCACAAGGTCATATCG-1 | GSM4626771 | OA |
| GSM4626771_TCACAAGGTCCGTCAG-1 | GSM4626771 | OA |
| GSM4626771_TCACAAGGTGTGACCC-1 | GSM4626771 | OA |
| GSM4626771_TCACAAGTCCATGAGT-1 | GSM4626771 | OA |
| GSM4626771_TCACGAAAGCGACGTA-1 | GSM4626771 | OA |
| GSM4626771_TCACGAAAGGAGCGAG-1 | GSM4626771 | OA |
| GSM4626771_TCACGAAAGGTAAACT-1 | GSM4626771 | OA |
| GSM4626771_TCACGAACACCAGTTA-1 | GSM4626771 | OA |
| GSM4626771_TCACGAACAGCAGTTT-1 | GSM4626771 | OA |
| GSM4626771_TCACGAACATATGAGA-1 | GSM4626771 | OA |
| GSM4626771_TCACGAAGTCCATCCT-1 | GSM4626771 | OA |
| GSM4626771_TCACGAAGTTGGAGGT-1 | GSM4626771 | OA |
| GSM4626771_TCACGAAGTTTACTCT-1 | GSM4626771 | OA |
| GSM4626771_TCACGAATCCACTGGG-1 | GSM4626771 | OA |
| GSM4626771_TCACGAATCCCTTGCA-1 | GSM4626771 | OA |
| GSM4626771_TCACGAATCGTCACGG-1 | GSM4626771 | OA |
| GSM4626771_TCACGAATCGTGACAT-1 | GSM4626771 | OA |
| GSM4626771_TCAGATGAGCAGCCTC-1 | GSM4626771 | OA |
| GSM4626771_TCAGATGCAAGCGAGT-1 | GSM4626771 | OA |
| GSM4626771_TCAGATGCAAGCTGGA-1 | GSM4626771 | OA |
| GSM4626771_TCAGATGCACCATCCT-1 | GSM4626771 | OA |
| GSM4626771_TCAGATGCAGCGAACA-1 | GSM4626771 | OA |
| GSM4626771_TCAGATGCAGTTTACG-1 | GSM4626771 | OA |
| GSM4626771_TCAGATGCATGCCACG-1 | GSM4626771 | OA |
| GSM4626771_TCAGATGGTCCCGACA-1 | GSM4626771 | OA |
| GSM4626771_TCAGATGTCAATAAGG-1 | GSM4626771 | OA |
| GSM4626771_TCAGCAAAGCAGCCTC-1 | GSM4626771 | OA |
| GSM4626771_TCAGCAAAGGACGAAA-1 | GSM4626771 | OA |
| GSM4626771_TCAGCAAAGGCCCGTT-1 | GSM4626771 | OA |
| GSM4626771_TCAGCAAAGTACCGGA-1 | GSM4626771 | OA |
| GSM4626771_TCAGCAAAGTTACGGG-1 | GSM4626771 | OA |
| GSM4626771_TCAGCAACAAGTAATG-1 | GSM4626771 | OA |
| GSM4626771_TCAGCAAGTGCGCTTG-1 | GSM4626771 | OA |
| GSM4626771_TCAGCAAGTTGTCGCG-1 | GSM4626771 | OA |
| GSM4626771_TCAGCAATCGGAGCAA-1 | GSM4626771 | OA |
| GSM4626771_TCAGCTCAGAACAATC-1 | GSM4626771 | OA |
| GSM4626771_TCAGCTCAGCCATCGC-1 | GSM4626771 | OA |
| GSM4626771_TCAGCTCAGCGGATCA-1 | GSM4626771 | OA |
| GSM4626771_TCAGCTCAGGCCATAG-1 | GSM4626771 | OA |
| GSM4626771_TCAGCTCAGGTGATAT-1 | GSM4626771 | OA |
| GSM4626771_TCAGCTCCACCCAGTG-1 | GSM4626771 | OA |
| GSM4626771_TCAGCTCGTATAGGTA-1 | GSM4626771 | OA |
| GSM4626771_TCAGCTCGTCGAAAGC-1 | GSM4626771 | OA |
| GSM4626771_TCAGCTCGTCTCACCT-1 | GSM4626771 | OA |
| GSM4626771_TCAGCTCGTGCGATAG-1 | GSM4626771 | OA |
| GSM4626771_TCAGCTCTCCACGACG-1 | GSM4626771 | OA |
| GSM4626771_TCAGCTCTCGTCCAGG-1 | GSM4626771 | OA |
| GSM4626771_TCAGGATCAAGCCTAT-1 | GSM4626771 | OA |
| GSM4626771_TCAGGATCACATCTTT-1 | GSM4626771 | OA |
| GSM4626771_TCAGGATCATCAGTAC-1 | GSM4626771 | OA |
| GSM4626771_TCAGGATGTAGTGAAT-1 | GSM4626771 | OA |
| GSM4626771_TCAGGATGTCCCTTGT-1 | GSM4626771 | OA |

|                               |            |    |
|-------------------------------|------------|----|
| GSM4626771_TCAGGATGTCGCATAT-1 | GSM4626771 | OA |
| GSM4626771_TCAGGATGTGATGATA-1 | GSM4626771 | OA |
| GSM4626771_TCAGGATTCTCGGACG-1 | GSM4626771 | OA |
| GSM4626771_TCAGGATTCTGCTGCT-1 | GSM4626771 | OA |
| GSM4626771_TCAGGTAAGCGATATA-1 | GSM4626771 | OA |
| GSM4626771_TCAGGTACAAACTGTC-1 | GSM4626771 | OA |
| GSM4626771_TCAGGTACAGCATGAG-1 | GSM4626771 | OA |
| GSM4626771_TCAGGTACATATGCTG-1 | GSM4626771 | OA |
| GSM4626771_TCAGGTACATGCCACG-1 | GSM4626771 | OA |
| GSM4626771_TCAGGTACATTACGAC-1 | GSM4626771 | OA |
| GSM4626771_TCAGGTATCAAACGGG-1 | GSM4626771 | OA |
| GSM4626771_TCATTACAGAAGATTC-1 | GSM4626771 | OA |
| GSM4626771_TCATTACAGATGTCGG-1 | GSM4626771 | OA |
| GSM4626771_TCATTACAGTGTACGG-1 | GSM4626771 | OA |
| GSM4626771_TCATTACCAAAGTGCG-1 | GSM4626771 | OA |
| GSM4626771_TCATTACCATCAGTAC-1 | GSM4626771 | OA |
| GSM4626771_TCATTACGTGTGGTTT-1 | GSM4626771 | OA |
| GSM4626771_TCATTACGTTGCTCCT-1 | GSM4626771 | OA |
| GSM4626771_TCATTACTCAGTTAGC-1 | GSM4626771 | OA |
| GSM4626771_TCATTACTCCGTCAA-1  | GSM4626771 | OA |
| GSM4626771_TCATTACTCGAAACG-1  | GSM4626771 | OA |
| GSM4626771_TCATTACTCTAACCGA-1 | GSM4626771 | OA |
| GSM4626771_TCATTACTCTGTCCGT-1 | GSM4626771 | OA |
| GSM4626771_TCATTACTCTTGTTTG-1 | GSM4626771 | OA |
| GSM4626771_TCATTTGAGTCATGCT-1 | GSM4626771 | OA |
| GSM4626771_TCATTTGCAAACAACA-1 | GSM4626771 | OA |
| GSM4626771_TCATTTGCAACGATGG-1 | GSM4626771 | OA |
| GSM4626771_TCATTTGCATTGTGCA-1 | GSM4626771 | OA |
| GSM4626771_TCATTTGGTAAATACG-1 | GSM4626771 | OA |
| GSM4626771_TCATTTGGTGATGTGG-1 | GSM4626771 | OA |
| GSM4626771_TCATTTGGTTCAACCA-1 | GSM4626771 | OA |
| GSM4626771_TCATTTGTCCACTGGG-1 | GSM4626771 | OA |
| GSM4626771_TCATTTGTCCTTTCGG-1 | GSM4626771 | OA |
| GSM4626771_TCATTTGTCGCGCCAA-1 | GSM4626771 | OA |
| GSM4626771_TCCACACAGAGACTAT-1 | GSM4626771 | OA |
| GSM4626771_TCCACACAGATGTGTA-1 | GSM4626771 | OA |
| GSM4626771_TCCACACAGGTGGGTT-1 | GSM4626771 | OA |
| GSM4626771_TCCACACAGTAGATGT-1 | GSM4626771 | OA |
| GSM4626771_TCCACACAGTTCGATC-1 | GSM4626771 | OA |
| GSM4626771_TCCACACCAAGCCATT-1 | GSM4626771 | OA |
| GSM4626771_TCCACACCACCACCAG-1 | GSM4626771 | OA |
| GSM4626771_TCCACACCATGCCCGA-1 | GSM4626771 | OA |
| GSM4626771_TCCACACGTCTTGCGG-1 | GSM4626771 | OA |
| GSM4626771_TCCACACTCACAAACC-1 | GSM4626771 | OA |
| GSM4626771_TCCACACTCGTTGACA-1 | GSM4626771 | OA |
| GSM4626771_TCCCGATAGCGTTGCC-1 | GSM4626771 | OA |
| GSM4626771_TCCCGATAGGCATTGG-1 | GSM4626771 | OA |
| GSM4626771_TCCCGATCACGCATCG-1 | GSM4626771 | OA |
| GSM4626771_TCCCGATCAGCTCGCA-1 | GSM4626771 | OA |
| GSM4626771_TCCCGATCAGTCACTA-1 | GSM4626771 | OA |
| GSM4626771_TCCCGATCATGAACCT-1 | GSM4626771 | OA |
| GSM4626771_TCCCGATGTCACCCAG-1 | GSM4626771 | OA |
| GSM4626771_TCCCGATGTCCATCCT-1 | GSM4626771 | OA |
| GSM4626771_TCCCGATGTGCTTCTC-1 | GSM4626771 | OA |
| GSM4626771_TCCCGATGTGGCCCTA-1 | GSM4626771 | OA |
| GSM4626771_TCCCGATGTTCCATGA-1 | GSM4626771 | OA |
| GSM4626771_TCCCGATTACAGATGT-1 | GSM4626771 | OA |

|                                |            |    |
|--------------------------------|------------|----|
| GSM4626771_TCCCGATTCACGGTTA-1  | GSM4626771 | OA |
| GSM4626771_TCCCGATTCAATTGCGA-1 | GSM4626771 | OA |
| GSM4626771_TCCCGATTCCCAACGG-1  | GSM4626771 | OA |
| GSM4626771_TCCCGATTCTGAATGCT-1 | GSM4626771 | OA |
| GSM4626771_TCGAGGCAGGACCACA-1  | GSM4626771 | OA |
| GSM4626771_TCGAGGCAGGACGAAA-1  | GSM4626771 | OA |
| GSM4626771_TCGAGGCAGTACCGGA-1  | GSM4626771 | OA |
| GSM4626771_TCGAGGCAGTCGCCGT-1  | GSM4626771 | OA |
| GSM4626771_TCGAGGCCACAAGCCC-1  | GSM4626771 | OA |
| GSM4626771_TCGAGGCCAGTCACTA-1  | GSM4626771 | OA |
| GSM4626771_TCGAGGCGTCAATGTC-1  | GSM4626771 | OA |
| GSM4626771_TCGAGGCGTCCGACGT-1  | GSM4626771 | OA |
| GSM4626771_TCGAGGCGTTATGTGC-1  | GSM4626771 | OA |
| GSM4626771_TCGAGGCGTTCGTTGA-1  | GSM4626771 | OA |
| GSM4626771_TCGAGGCTCGCAGGCT-1  | GSM4626771 | OA |
| GSM4626771_TCGCGAGAGGGTATCG-1  | GSM4626771 | OA |
| GSM4626771_TCGCGAGAGGTACTCT-1  | GSM4626771 | OA |
| GSM4626771_TCGCGAGCAAAGTCT-1   | GSM4626771 | OA |
| GSM4626771_TCGCGAGCACATTTCT-1  | GSM4626771 | OA |
| GSM4626771_TCGCGAGGTCCGCTGA-1  | GSM4626771 | OA |
| GSM4626771_TCGCGTTAGCCAGAAC-1  | GSM4626771 | OA |
| GSM4626771_TCGCGTTAGCTCCCAG-1  | GSM4626771 | OA |
| GSM4626771_TCGCGTTCACATGTGT-1  | GSM4626771 | OA |
| GSM4626771_TCGCGTTCATCCGGGT-1  | GSM4626771 | OA |
| GSM4626771_TCGCGTTTTCAAACCGT-1 | GSM4626771 | OA |
| GSM4626771_TCGCGTTTTCACCTCGT-1 | GSM4626771 | OA |
| GSM4626771_TCGCGTTTTCACTTACT-1 | GSM4626771 | OA |
| GSM4626771_TCGCGTTTTCCGTCATC-1 | GSM4626771 | OA |
| GSM4626771_TCGGGACAGCCACGCT-1  | GSM4626771 | OA |
| GSM4626771_TCGGGACAGCGATATA-1  | GSM4626771 | OA |
| GSM4626771_TCGGGACAGGGAAACA-1  | GSM4626771 | OA |
| GSM4626771_TCGGGACCACCAGGTC-1  | GSM4626771 | OA |
| GSM4626771_TCGGGACGTACTTGAC-1  | GSM4626771 | OA |
| GSM4626771_TCGGGACGTAGGAGTC-1  | GSM4626771 | OA |
| GSM4626771_TCGGGACGTCTGCCAG-1  | GSM4626771 | OA |
| GSM4626771_TCGGGACGTTCGGGCT-1  | GSM4626771 | OA |
| GSM4626771_TCGGGACTCAAAGTAG-1  | GSM4626771 | OA |
| GSM4626771_TCGGGACTCCATGAAC-1  | GSM4626771 | OA |
| GSM4626771_TCGGTAAAGAAACCAT-1  | GSM4626771 | OA |
| GSM4626771_TCGGTAAAGCCCGAAA-1  | GSM4626771 | OA |
| GSM4626771_TCGGTAAAGCTAGTGG-1  | GSM4626771 | OA |
| GSM4626771_TCGGTAAAGGACACCA-1  | GSM4626771 | OA |
| GSM4626771_TCGGTAAAGTGAAGTT-1  | GSM4626771 | OA |
| GSM4626771_TCGGTAAACAGCCAATT-1 | GSM4626771 | OA |
| GSM4626771_TCGGTAAACATTGGGCC-1 | GSM4626771 | OA |
| GSM4626771_TCGGTAAAGTAATTGGA-1 | GSM4626771 | OA |
| GSM4626771_TCGGTAAAGTCTAAAGA-1 | GSM4626771 | OA |
| GSM4626771_TCGGTAAAGTCTGCAAT-1 | GSM4626771 | OA |
| GSM4626771_TCGGTAAAGTTGTGGAG-1 | GSM4626771 | OA |
| GSM4626771_TCGGTAAAGTTTGCATG-1 | GSM4626771 | OA |
| GSM4626771_TCGGTAAATCAACGAAA-1 | GSM4626771 | OA |
| GSM4626771_TCGGTAAATCTAACGGT-1 | GSM4626771 | OA |
| GSM4626771_TCGTACCAGGCAATTA-1  | GSM4626771 | OA |
| GSM4626771_TCGTACCAGGTGATAT-1  | GSM4626771 | OA |
| GSM4626771_TCGTACCCACGAGAGT-1  | GSM4626771 | OA |
| GSM4626771_TCGTACCCGTATAGTAG-1 | GSM4626771 | OA |
| GSM4626771_TCGTACCCGTATCGCAT-1 | GSM4626771 | OA |



|                                |            |    |
|--------------------------------|------------|----|
| GSM4626771_TCGTACCGTTACCAGT-1  | GSM4626771 | OA |
| GSM4626771_TCGTACCTCAGCGACC-1  | GSM4626771 | OA |
| GSM4626771_TCGTACCTCATTCACT-1  | GSM4626771 | OA |
| GSM4626771_TCGTACCTCGAATCCA-1  | GSM4626771 | OA |
| GSM4626771_TCGTAGAAGTTTCCTT-1  | GSM4626771 | OA |
| GSM4626771_TCGTAGACAAACGTGG-1  | GSM4626771 | OA |
| GSM4626771_TCGTAGACAATAACGA-1  | GSM4626771 | OA |
| GSM4626771_TCGTAGAGTCGGGTCT-1  | GSM4626771 | OA |
| GSM4626771_TCGTAGAGTGAAGGCT-1  | GSM4626771 | OA |
| GSM4626771_TCGTAGAGTGTGCGTC-1  | GSM4626771 | OA |
| GSM4626771_TCTATTGAGTTAGGTA-1  | GSM4626771 | OA |
| GSM4626771_TCTATTGCAAACAACA-1  | GSM4626771 | OA |
| GSM4626771_TCTATTGCAGTCAGCC-1  | GSM4626771 | OA |
| GSM4626771_TCTATTGGTAGCGCAA-1  | GSM4626771 | OA |
| GSM4626771_TCTATTGGTCCGACGT-1  | GSM4626771 | OA |
| GSM4626771_TCTATTGGTCTCCACT-1  | GSM4626771 | OA |
| GSM4626771_TCTATTGGTCTCTTAT-1  | GSM4626771 | OA |
| GSM4626771_TCTATTGGTGGTTTCA-1  | GSM4626771 | OA |
| GSM4626771_TCTATTGTCTGCAAGT-1  | GSM4626771 | OA |
| GSM4626771_TCTCATAAGATCGGGT-1  | GSM4626771 | OA |
| GSM4626771_TCTCATAAGCACAGGT-1  | GSM4626771 | OA |
| GSM4626771_TCTCATAAGGGAGTAA-1  | GSM4626771 | OA |
| GSM4626771_TCTCATAAGGTGCACA-1  | GSM4626771 | OA |
| GSM4626771_TCTCATAACAGGTGGAT-1 | GSM4626771 | OA |
| GSM4626771_TCTCATAGTAGTACCT-1  | GSM4626771 | OA |
| GSM4626771_TCTCATAGTTTAGCTG-1  | GSM4626771 | OA |
| GSM4626771_TCTCATATCCACGAAT-1  | GSM4626771 | OA |
| GSM4626771_TCTCATATCGGCGGTT-1  | GSM4626771 | OA |
| GSM4626771_TCTCATATCTATCCCG-1  | GSM4626771 | OA |
| GSM4626771_TCTCTAAAGGCTATCT-1  | GSM4626771 | OA |
| GSM4626771_TCTCTAAAGTAGGCCA-1  | GSM4626771 | OA |
| GSM4626771_TCTCTAAAGTGTACCT-1  | GSM4626771 | OA |
| GSM4626771_TCTCTAAAGTTCGCAT-1  | GSM4626771 | OA |
| GSM4626771_TCTCTAACAACTGGCC-1  | GSM4626771 | OA |
| GSM4626771_TCTCTAACAAATGACCT-1 | GSM4626771 | OA |
| GSM4626771_TCTCTAACACGTAAGG-1  | GSM4626771 | OA |
| GSM4626771_TCTCTAACAGACAAGC-1  | GSM4626771 | OA |
| GSM4626771_TCTCTAACAGTTTACG-1  | GSM4626771 | OA |
| GSM4626771_TCTCTAACATTAGCCA-1  | GSM4626771 | OA |
| GSM4626771_TCTCTAAGTAAGAGGA-1  | GSM4626771 | OA |
| GSM4626771_TCTCTAATCTCGTATT-1  | GSM4626771 | OA |
| GSM4626771_TCTGAGAAGAGCTGCA-1  | GSM4626771 | OA |
| GSM4626771_TCTGAGAAGGTAAACT-1  | GSM4626771 | OA |
| GSM4626771_TCTGAGAAGTGTTAGA-1  | GSM4626771 | OA |
| GSM4626771_TCTGAGACAGCCTTTC-1  | GSM4626771 | OA |
| GSM4626771_TCTGAGACATAGAAAC-1  | GSM4626771 | OA |
| GSM4626771_TCTGAGAGTTCCACGG-1  | GSM4626771 | OA |
| GSM4626771_TCTGAGATCATGCATG-1  | GSM4626771 | OA |
| GSM4626771_TCTGAGATCCCTTGCA-1  | GSM4626771 | OA |
| GSM4626771_TCTGAGATCCTTCAAT-1  | GSM4626771 | OA |
| GSM4626771_TCTGAGATCTAACTCT-1  | GSM4626771 | OA |
| GSM4626771_TCTGAGATCTGCCAGG-1  | GSM4626771 | OA |
| GSM4626771_TCTGGAAAGAAGGGTA-1  | GSM4626771 | OA |
| GSM4626771_TCTGGAACACGCGAAA-1  | GSM4626771 | OA |
| GSM4626771_TCTGGAACATGACGGA-1  | GSM4626771 | OA |
| GSM4626771_TCTGGAACATGTAGTC-1  | GSM4626771 | OA |
| GSM4626771_TCTGGAAGTTTGCGC-1   | GSM4626771 | OA |

|                                |            |    |
|--------------------------------|------------|----|
| GSM4626771_TCTGGAATCCAATGGT-1  | GSM4626771 | OA |
| GSM4626771_TCTGGAATCCACGTTT-1  | GSM4626771 | OA |
| GSM4626771_TCTGGAATCGCGTTTT-1  | GSM4626771 | OA |
| GSM4626771_TCTTCGGAGCGTGTCC-1  | GSM4626771 | OA |
| GSM4626771_TCTTCGGAGGCATGTG-1  | GSM4626771 | OA |
| GSM4626771_TCTTCGGAGTATCGAA-1  | GSM4626771 | OA |
| GSM4626771_TCTTCGGCATGGTCAT-1  | GSM4626771 | OA |
| GSM4626771_TCTTCGGGTATTCTCT-1  | GSM4626771 | OA |
| GSM4626771_TCTTCGGGTTATGTGC-1  | GSM4626771 | OA |
| GSM4626771_TCTTCGGTCCGGGTGT-1  | GSM4626771 | OA |
| GSM4626771_TCTTCGGTCGATAGAA-1  | GSM4626771 | OA |
| GSM4626771_TCTTTCCAGAAAGTGG-1  | GSM4626771 | OA |
| GSM4626771_TCTTTCCAGGACCACA-1  | GSM4626771 | OA |
| GSM4626771_TCTTTCCAGGCAATTA-1  | GSM4626771 | OA |
| GSM4626771_TCTTTCCAGTCGTTTG-1  | GSM4626771 | OA |
| GSM4626771_TCTTTCCCACTCTGTC-1  | GSM4626771 | OA |
| GSM4626771_TCTTTCCAGCTCCGA-1   | GSM4626771 | OA |
| GSM4626771_TCTTTCCGTAATAGCA-1  | GSM4626771 | OA |
| GSM4626771_TCTTTCCCTCATGTCTT-1 | GSM4626771 | OA |
| GSM4626771_TGAAAGAAGAGGTAGA-1  | GSM4626771 | OA |
| GSM4626771_TGAAAGACACCATGTA-1  | GSM4626771 | OA |
| GSM4626771_TGAAAGAGTTATCGGT-1  | GSM4626771 | OA |
| GSM4626771_TGAAAGATCCGCAAGC-1  | GSM4626771 | OA |
| GSM4626771_TGAAAGATCCTGTAGA-1  | GSM4626771 | OA |
| GSM4626771_TGACAACAGACCGGAT-1  | GSM4626771 | OA |
| GSM4626771_TGACAACAGCTCCCAG-1  | GSM4626771 | OA |
| GSM4626771_TGACAACCAGCCTATA-1  | GSM4626771 | OA |
| GSM4626771_TGACAACGTGTTGAGG-1  | GSM4626771 | OA |
| GSM4626771_TGACAACCTCGACAGCC-1 | GSM4626771 | OA |
| GSM4626771_TGACAACCTCGGCGTT-1  | GSM4626771 | OA |
| GSM4626771_TGACGGCCAGCGTCCA-1  | GSM4626771 | OA |
| GSM4626771_TGACGGCCATGCAATC-1  | GSM4626771 | OA |
| GSM4626771_TGACGGCCATGGTCTA-1  | GSM4626771 | OA |
| GSM4626771_TGACGGCGTTACGGAG-1  | GSM4626771 | OA |
| GSM4626771_TGACGGCGTTGCCTCT-1  | GSM4626771 | OA |
| GSM4626771_TGACGGCTCCCTAACC-1  | GSM4626771 | OA |
| GSM4626771_TGACGGCTCCCTGACT-1  | GSM4626771 | OA |
| GSM4626771_TGACTAGAGCCACCTG-1  | GSM4626771 | OA |
| GSM4626771_TGACTAGCACAACTGT-1  | GSM4626771 | OA |
| GSM4626771_TGACTAGCACACCAG-1   | GSM4626771 | OA |
| GSM4626771_TGACTAGCACGGTAGA-1  | GSM4626771 | OA |
| GSM4626771_TGACTAGCATCTATGG-1  | GSM4626771 | OA |
| GSM4626771_TGACTAGGTCACAAGG-1  | GSM4626771 | OA |
| GSM4626771_TGACTAGGTTCAGACT-1  | GSM4626771 | OA |
| GSM4626771_TGACTAGTCGCAAAC-1   | GSM4626771 | OA |
| GSM4626771_TGACTAGTCGCTTGTC-1  | GSM4626771 | OA |
| GSM4626771_TGACTAGTCTTCCTTC-1  | GSM4626771 | OA |
| GSM4626771_TGACTTTAGCATCATC-1  | GSM4626771 | OA |
| GSM4626771_TGACTTTAGGGATCTG-1  | GSM4626771 | OA |
| GSM4626771_TGACTTTCACATTAGC-1  | GSM4626771 | OA |
| GSM4626771_TGACTTTCAGAAGCAC-1  | GSM4626771 | OA |
| GSM4626771_TGACTTTCATATGCTG-1  | GSM4626771 | OA |
| GSM4626771_TGACTTTGTCTTCTCG-1  | GSM4626771 | OA |
| GSM4626771_TGAGAGGAGATCTGAA-1  | GSM4626771 | OA |
| GSM4626771_TGAGAGGAGTGTTCG-1   | GSM4626771 | OA |
| GSM4626771_TGAGAGGCAGATGGCA-1  | GSM4626771 | OA |
| GSM4626771_TGAGAGGGTCGAGATG-1  | GSM4626771 | OA |

|                                |            |    |
|--------------------------------|------------|----|
| GSM4626771_TGAGAGGGTGCACGAA-1  | GSM4626771 | OA |
| GSM4626771_TGAGAGGGTGTCAATC-1  | GSM4626771 | OA |
| GSM4626771_TGAGAGGGTCTACAGA-1  | GSM4626771 | OA |
| GSM4626771_TGAGCATAGATGTTAG-1  | GSM4626771 | OA |
| GSM4626771_TGAGCATAGCATGGCA-1  | GSM4626771 | OA |
| GSM4626771_TGAGCATAGCTAGTTC-1  | GSM4626771 | OA |
| GSM4626771_TGAGCATAGTACTTGC-1  | GSM4626771 | OA |
| GSM4626771_TGAGCATAGTCCCACG-1  | GSM4626771 | OA |
| GSM4626771_TGAGCATAGTCCGGTC-1  | GSM4626771 | OA |
| GSM4626771_TGAGCATAGTGAACAT-1  | GSM4626771 | OA |
| GSM4626771_TGAGCATCAAGTTGTC-1  | GSM4626771 | OA |
| GSM4626771_TGAGCATCACGTAAGG-1  | GSM4626771 | OA |
| GSM4626771_TGAGCATTCCAGGGCT-1  | GSM4626771 | OA |
| GSM4626771_TGAGCATTCTTCGGTC-1  | GSM4626771 | OA |
| GSM4626771_TGAGCCGAGACAGAGA-1  | GSM4626771 | OA |
| GSM4626771_TGAGCCGAGATCCTGT-1  | GSM4626771 | OA |
| GSM4626771_TGAGCCGAGATGCGAC-1  | GSM4626771 | OA |
| GSM4626771_TGAGCCGAGCGTAATA-1  | GSM4626771 | OA |
| GSM4626771_TGAGCCGCACCTATCC-1  | GSM4626771 | OA |
| GSM4626771_TGAGCCGCAGCTGTTA-1  | GSM4626771 | OA |
| GSM4626771_TGAGCCGGTAACGTTTC-1 | GSM4626771 | OA |
| GSM4626771_TGAGCCGGTGATGTGG-1  | GSM4626771 | OA |
| GSM4626771_TGAGCCGTCTGGTCTAA-1 | GSM4626771 | OA |
| GSM4626771_TGAGGGAAGACCGGAT-1  | GSM4626771 | OA |
| GSM4626771_TGAGGGAAGATCCTGT-1  | GSM4626771 | OA |
| GSM4626771_TGAGGGAAGATGTTAG-1  | GSM4626771 | OA |
| GSM4626771_TGAGGGAAGCCTTGAT-1  | GSM4626771 | OA |
| GSM4626771_TGAGGGACAAAGCGGT-1  | GSM4626771 | OA |
| GSM4626771_TGAGGGACAAAGGAAG-1  | GSM4626771 | OA |
| GSM4626771_TGAGGGACAACGATGG-1  | GSM4626771 | OA |
| GSM4626771_TGAGGGACATCGGGTC-1  | GSM4626771 | OA |
| GSM4626771_TGAGGGACATGCCCGA-1  | GSM4626771 | OA |
| GSM4626771_TGAGGGAGTGCATCTA-1  | GSM4626771 | OA |
| GSM4626771_TGAGGGAGTGCTAGCC-1  | GSM4626771 | OA |
| GSM4626771_TGAGGGAGTTCACGGC-1  | GSM4626771 | OA |
| GSM4626771_TGAGGGAGTTCGGTCT-1  | GSM4626771 | OA |
| GSM4626771_TGAGGGATCAGAGGTG-1  | GSM4626771 | OA |
| GSM4626771_TGAGGGATCGGCTACG-1  | GSM4626771 | OA |
| GSM4626771_TGATTTTCAGACCTAGG-1 | GSM4626771 | OA |
| GSM4626771_TGATTTTCAGATAGGAG-1 | GSM4626771 | OA |
| GSM4626771_TGATTTCCACAGGAGT-1  | GSM4626771 | OA |
| GSM4626771_TGATTTCCATACTACG-1  | GSM4626771 | OA |
| GSM4626771_TGATTTCCATCCGGGT-1  | GSM4626771 | OA |
| GSM4626771_TGATTTTCGTCTGATCA-1 | GSM4626771 | OA |
| GSM4626771_TGATTTTCGTCTGCGGT-1 | GSM4626771 | OA |
| GSM4626771_TGATTTTCGTCTTGATG-1 | GSM4626771 | OA |
| GSM4626771_TGATTTTCGTGACGCCT-1 | GSM4626771 | OA |
| GSM4626771_TGATTTCTCACGCGGT-1  | GSM4626771 | OA |
| GSM4626771_TGCACCTAGAGCAATT-1  | GSM4626771 | OA |
| GSM4626771_TGCACCTAGCGAGAAA-1  | GSM4626771 | OA |
| GSM4626771_TGCACCTAGGCCCGTT-1  | GSM4626771 | OA |
| GSM4626771_TGCACCTAGGGTTCCC-1  | GSM4626771 | OA |
| GSM4626771_TGCACCTCAAAGAATC-1  | GSM4626771 | OA |
| GSM4626771_TGCACCTCAATGGAGC-1  | GSM4626771 | OA |
| GSM4626771_TGCACCTGTAATCACC-1  | GSM4626771 | OA |
| GSM4626771_TGCACCTGTCTACCTC-1  | GSM4626771 | OA |
| GSM4626771_TGCACCTTCACCATAG-1  | GSM4626771 | OA |

|                               |            |    |
|-------------------------------|------------|----|
| GSM4626771_TGCACCTTCCTACAGA-1 | GSM4626771 | OA |
| GSM4626771_TGCACCTTCTGCAGTA-1 | GSM4626771 | OA |
| GSM4626771_TGCCAAAAGAACTGTA-1 | GSM4626771 | OA |
| GSM4626771_TGCCAAAAGACCGGAT-1 | GSM4626771 | OA |
| GSM4626771_TGCCAAAAGTGGAGTC-1 | GSM4626771 | OA |
| GSM4626771_TGCCAAACAAATTGCC-1 | GSM4626771 | OA |
| GSM4626771_TGCCAAACAGGACGTA-1 | GSM4626771 | OA |
| GSM4626771_TGCCAAACAGGTCTCG-1 | GSM4626771 | OA |
| GSM4626771_TGCCAAAGTACCGTTA-1 | GSM4626771 | OA |
| GSM4626771_TGCCAAAGTAGATTAG-1 | GSM4626771 | OA |
| GSM4626771_TGCCAAAGTTGGTAAA-1 | GSM4626771 | OA |
| GSM4626771_TGCCCATAGATTACCC-1 | GSM4626771 | OA |
| GSM4626771_TGCCCATAGCGTCTAT-1 | GSM4626771 | OA |
| GSM4626771_TGCCCATCACTGTCGG-1 | GSM4626771 | OA |
| GSM4626771_TGCCCATGTCGGCACT-1 | GSM4626771 | OA |
| GSM4626771_TGCCCATTCACTCTTA-1 | GSM4626771 | OA |
| GSM4626771_TGCCCATTCATTGCGA-1 | GSM4626771 | OA |
| GSM4626771_TGCCCATTCCAAATGC-1 | GSM4626771 | OA |
| GSM4626771_TGCCCATTCCTATTAT-1 | GSM4626771 | OA |
| GSM4626771_TGCCCTACAAGTCTAC-1 | GSM4626771 | OA |
| GSM4626771_TGCCCTACAATAACGA-1 | GSM4626771 | OA |
| GSM4626771_TGCCCTACACCCAGTG-1 | GSM4626771 | OA |
| GSM4626771_TGCCCTACAGACGTAG-1 | GSM4626771 | OA |
| GSM4626771_TGCCCTACAGCGATCC-1 | GSM4626771 | OA |
| GSM4626771_TGCCCTAGTGCCTGCA-1 | GSM4626771 | OA |
| GSM4626771_TGCCCTATCTTGCAAG-1 | GSM4626771 | OA |
| GSM4626771_TGCGCAGAGACACTAA-1 | GSM4626771 | OA |
| GSM4626771_TGCGCAGAGCCTCGTG-1 | GSM4626771 | OA |
| GSM4626771_TGCGCAGAGGCCCTTG-1 | GSM4626771 | OA |
| GSM4626771_TGCGCAGCAATAGCAA-1 | GSM4626771 | OA |
| GSM4626771_TGCGCAGCAATTGCTG-1 | GSM4626771 | OA |
| GSM4626771_TGCGCAGCAGCCTTGG-1 | GSM4626771 | OA |
| GSM4626771_TGCGCAGCATCATCCC-1 | GSM4626771 | OA |
| GSM4626771_TGCGCAGGTAGAAAGG-1 | GSM4626771 | OA |
| GSM4626771_TGCGCAGGTCCTCCAT-1 | GSM4626771 | OA |
| GSM4626771_TGCGCAGGTCTCTTAT-1 | GSM4626771 | OA |
| GSM4626771_TGCGCAGTCCTCTAGC-1 | GSM4626771 | OA |
| GSM4626771_TGCGGGTAGCCAGGAT-1 | GSM4626771 | OA |
| GSM4626771_TGCGGGTGTGCAAAGC-1 | GSM4626771 | OA |
| GSM4626771_TGCGGGTGTCTGCGGT-1 | GSM4626771 | OA |
| GSM4626771_TGCGGGTGTGAGTATA-1 | GSM4626771 | OA |
| GSM4626771_TGCGGGTGTTCGCGAC-1 | GSM4626771 | OA |
| GSM4626771_TGCGGGTTCAGGCAAG-1 | GSM4626771 | OA |
| GSM4626771_TGCGTGGAGATGGGTC-1 | GSM4626771 | OA |
| GSM4626771_TGCGTGGAGCACCGTC-1 | GSM4626771 | OA |
| GSM4626771_TGCGTGGAGGTGCTAG-1 | GSM4626771 | OA |
| GSM4626771_TGCGTGGAGTGCCAGA-1 | GSM4626771 | OA |
| GSM4626771_TGCGTGGCAGACGTAG-1 | GSM4626771 | OA |
| GSM4626771_TGCGTGGCAGCCACCA-1 | GSM4626771 | OA |
| GSM4626771_TGCGTGGCATGTTGAC-1 | GSM4626771 | OA |
| GSM4626771_TGCGTGGGTCTAAAGA-1 | GSM4626771 | OA |
| GSM4626771_TGCGTGGTTCGAAATA-1 | GSM4626771 | OA |
| GSM4626771_TGCTACCAGAAGATTC-1 | GSM4626771 | OA |
| GSM4626771_TGCTACCAGACGACA-1  | GSM4626771 | OA |
| GSM4626771_TGCTACCAGCCGCTA-1  | GSM4626771 | OA |
| GSM4626771_TGCTACCAGTCGTACT-1 | GSM4626771 | OA |
| GSM4626771_TGCTACCAGTGTCTCA-1 | GSM4626771 | OA |

|                               |            |    |
|-------------------------------|------------|----|
| GSM4626771_TGCTACCCAGCTGCTG-1 | GSM4626771 | OA |
| GSM4626771_TGCTACCCATTAGGCT-1 | GSM4626771 | OA |
| GSM4626771_TGCTACCGTCAGCTAT-1 | GSM4626771 | OA |
| GSM4626771_TGCTACCGTCATTAGC-1 | GSM4626771 | OA |
| GSM4626771_TGCTACCTCAGCTGGC-1 | GSM4626771 | OA |
| GSM4626771_TGCTACCTCTGGGCCA-1 | GSM4626771 | OA |
| GSM4626771_TGCTACCTCTGTACGA-1 | GSM4626771 | OA |
| GSM4626771_TGCTGCTAGAAGGACA-1 | GSM4626771 | OA |
| GSM4626771_TGCTGCTAGACAGAGA-1 | GSM4626771 | OA |
| GSM4626771_TGCTGCTAGATAGTCA-1 | GSM4626771 | OA |
| GSM4626771_TGCTGCTAGCTGCGAA-1 | GSM4626771 | OA |
| GSM4626771_TGCTGCTCAGCCTTTC-1 | GSM4626771 | OA |
| GSM4626771_TGCTGCTGTACTCAAC-1 | GSM4626771 | OA |
| GSM4626771_TGCTGCTGTCAATGTC-1 | GSM4626771 | OA |
| GSM4626771_TGCTGCTGTTTGTGTG-1 | GSM4626771 | OA |
| GSM4626771_TGCTGCTTCAGCCTAA-1 | GSM4626771 | OA |
| GSM4626771_TGCTGCTTCATTTGGG-1 | GSM4626771 | OA |
| GSM4626771_TGCTGCTTCCGTCATC-1 | GSM4626771 | OA |
| GSM4626771_TGCTGCTTCCTTGGTG-1 | GSM4626771 | OA |
| GSM4626771_TGCTGCTTCTTGAGAC-1 | GSM4626771 | OA |
| GSM4626771_TGGACGCAGCCAGGAT-1 | GSM4626771 | OA |
| GSM4626771_TGGACGCAGGCAATTA-1 | GSM4626771 | OA |
| GSM4626771_TGGACGCCAAGGACAC-1 | GSM4626771 | OA |
| GSM4626771_TGGACGCCACACTGCG-1 | GSM4626771 | OA |
| GSM4626771_TGGACGCCACAGGCCT-1 | GSM4626771 | OA |
| GSM4626771_TGGACGCGTCCCGACA-1 | GSM4626771 | OA |
| GSM4626771_TGGACGCGTCCCTTGT-1 | GSM4626771 | OA |
| GSM4626771_TGGACGCGTCCGAACC-1 | GSM4626771 | OA |
| GSM4626771_TGGACGCTCATGTGGT-1 | GSM4626771 | OA |
| GSM4626771_TGGACGCTCGCGATCG-1 | GSM4626771 | OA |
| GSM4626771_TGGACGCTCGGTCCGA-1 | GSM4626771 | OA |
| GSM4626771_TGGCCAGAGGTGACCA-1 | GSM4626771 | OA |
| GSM4626771_TGGCCAGAGGTGCTTT-1 | GSM4626771 | OA |
| GSM4626771_TGGCCAGCACCGATAT-1 | GSM4626771 | OA |
| GSM4626771_TGGCCAGCACCGGAAA-1 | GSM4626771 | OA |
| GSM4626771_TGGCCAGCAGCGTTCG-1 | GSM4626771 | OA |
| GSM4626771_TGGCCAGGTCCTCCAT-1 | GSM4626771 | OA |
| GSM4626771_TGGCCAGGTCTAGCGC-1 | GSM4626771 | OA |
| GSM4626771_TGGCCAGGTCTTTCAT-1 | GSM4626771 | OA |
| GSM4626771_TGGCCAGGTTAAAGTG-1 | GSM4626771 | OA |
| GSM4626771_TGGCCAGTCGAGCCCA-1 | GSM4626771 | OA |
| GSM4626771_TGGCCAGTCGTTGACA-1 | GSM4626771 | OA |
| GSM4626771_TGGCCAGTCTGCAAGT-1 | GSM4626771 | OA |
| GSM4626771_TGGCGCAAGACCCACC-1 | GSM4626771 | OA |
| GSM4626771_TGGCGCAAGTGTCCAT-1 | GSM4626771 | OA |
| GSM4626771_TGGCGCAAGTGTCTCA-1 | GSM4626771 | OA |
| GSM4626771_TGGCGCACAGACGCCT-1 | GSM4626771 | OA |
| GSM4626771_TGGCGCACAGACGTAG-1 | GSM4626771 | OA |
| GSM4626771_TGGCGCACAGTCAGCC-1 | GSM4626771 | OA |
| GSM4626771_TGGCGCACATCGATGT-1 | GSM4626771 | OA |
| GSM4626771_TGGCGCAGTACTTCTT-1 | GSM4626771 | OA |
| GSM4626771_TGGCGCAGTTCGTGAT-1 | GSM4626771 | OA |
| GSM4626771_TGGCGCATCGGAGCAA-1 | GSM4626771 | OA |
| GSM4626771_TGGCTGGAGAACAATC-1 | GSM4626771 | OA |
| GSM4626771_TGGCTGGAGTGAACGC-1 | GSM4626771 | OA |
| GSM4626771_TGGCTGGAGTGTGGCA-1 | GSM4626771 | OA |
| GSM4626771_TGGCTGGCACGTCTCT-1 | GSM4626771 | OA |

|                                |            |    |
|--------------------------------|------------|----|
| GSM4626771_TGGCTGGGTGTCGCTG-1  | GSM4626771 | OA |
| GSM4626771_TGGCTGGGTTCCACGG-1  | GSM4626771 | OA |
| GSM4626771_TGGCTGGTCAGGCGAA-1  | GSM4626771 | OA |
| GSM4626771_TGGCTGGTCATGTAGC-1  | GSM4626771 | OA |
| GSM4626771_TGGCTGGTCGCAAAC-1   | GSM4626771 | OA |
| GSM4626771_TGGCTGGTCGTTACGA-1  | GSM4626771 | OA |
| GSM4626771_TGGGAAGCAGATCCAT-1  | GSM4626771 | OA |
| GSM4626771_TGGGAAGGTCGTCTTC-1  | GSM4626771 | OA |
| GSM4626771_TGGGAAGGTTAAAGAC-1  | GSM4626771 | OA |
| GSM4626771_TGGGAAGGTTATCCGA-1  | GSM4626771 | OA |
| GSM4626771_TGGGAAGTCAGGTA-1    | GSM4626771 | OA |
| GSM4626771_TGGGAAGTCATCGGAT-1  | GSM4626771 | OA |
| GSM4626771_TGGGAAGTCATGTAGC-1  | GSM4626771 | OA |
| GSM4626771_TGGGAAGTCGTCCGTT-1  | GSM4626771 | OA |
| GSM4626771_TGGGCGTAGACTGTAA-1  | GSM4626771 | OA |
| GSM4626771_TGGGCGTCACTAAGTC-1  | GSM4626771 | OA |
| GSM4626771_TGGGCGTGTGGTTTCA-1  | GSM4626771 | OA |
| GSM4626771_TGGGCGTTCCTTTACA-1  | GSM4626771 | OA |
| GSM4626771_TGGTTAGAGGGAGTAA-1  | GSM4626771 | OA |
| GSM4626771_TGGTTAGAGTACGCC-1   | GSM4626771 | OA |
| GSM4626771_TGGTTAGCACATGACT-1  | GSM4626771 | OA |
| GSM4626771_TGGTTAGCATGTGAT-1   | GSM4626771 | OA |
| GSM4626771_TGGTTAGGTGCGATAG-1  | GSM4626771 | OA |
| GSM4626771_TGGTTAGTCACAGGCC-1  | GSM4626771 | OA |
| GSM4626771_TGGTTAGTCCAAGTAC-1  | GSM4626771 | OA |
| GSM4626771_TGGTTCCAGAGCTTCT-1  | GSM4626771 | OA |
| GSM4626771_TGGTTCCAGCCTCGTG-1  | GSM4626771 | OA |
| GSM4626771_TGGTTCCAGGGTCTCC-1  | GSM4626771 | OA |
| GSM4626771_TGGTTCCCAAACAACA-1  | GSM4626771 | OA |
| GSM4626771_TGGTTCCGTCAATACC-1  | GSM4626771 | OA |
| GSM4626771_TGGTTCCGTGAGAGGT-1  | GSM4626771 | OA |
| GSM4626771_TGGTTCCGTGCGATCC-1  | GSM4626771 | OA |
| GSM4626771_TGGTTCCGTCTTGCGG-1  | GSM4626771 | OA |
| GSM4626771_TGGTTCCGTTCCATGA-1  | GSM4626771 | OA |
| GSM4626771_TGGTTCCCTCAGCTCGG-1 | GSM4626771 | OA |
| GSM4626771_TGGTTCCCTCGCCCTTA-1 | GSM4626771 | OA |
| GSM4626771_TGGTTCCCTCGCGTAGC-1 | GSM4626771 | OA |
| GSM4626771_TGGTTCCCTCTTCCTTC-1 | GSM4626771 | OA |
| GSM4626771_TGTATTCAGACTAGAT-1  | GSM4626771 | OA |
| GSM4626771_TGTATTCAGATATGGT-1  | GSM4626771 | OA |
| GSM4626771_TGTATTCAGGACAGCT-1  | GSM4626771 | OA |
| GSM4626771_TGTATTCAGGCAATTA-1  | GSM4626771 | OA |
| GSM4626771_TGTATTCAGTCATCCA-1  | GSM4626771 | OA |
| GSM4626771_TGTATTCGTGCTGTAT-1  | GSM4626771 | OA |
| GSM4626771_TGTATTCCTCGTAGGC-1  | GSM4626771 | OA |
| GSM4626771_TGTATTCCTGCAGG-1    | GSM4626771 | OA |
| GSM4626771_TGTATTCCTGTACC-1    | GSM4626771 | OA |
| GSM4626771_TGTCCACACTACAGT-1   | GSM4626771 | OA |
| GSM4626771_TGTCCCATCCCAACGG-1  | GSM4626771 | OA |
| GSM4626771_TGTCCCATCCCTTGTTG-1 | GSM4626771 | OA |
| GSM4626771_TGTCCCATCTACTTAC-1  | GSM4626771 | OA |
| GSM4626771_TGTGGTAAGAAGTGT-1   | GSM4626771 | OA |
| GSM4626771_TGTGGTAAGAAGGACA-1  | GSM4626771 | OA |
| GSM4626771_TGTGGTAAGGCCGTT-1   | GSM4626771 | OA |
| GSM4626771_TGTGGTAAGGTGACCA-1  | GSM4626771 | OA |
| GSM4626771_TGTGGTACAAGCGCTC-1  | GSM4626771 | OA |
| GSM4626771_TGTGGTACATCTACGA-1  | GSM4626771 | OA |



|                                |            |    |
|--------------------------------|------------|----|
| GSM4626771_TTAGTTCAGACTGGGT-1  | GSM4626771 | OA |
| GSM4626771_TTAGTTCAGGGCACTA-1  | GSM4626771 | OA |
| GSM4626771_TTAGTTCACGGCGTT-1   | GSM4626771 | OA |
| GSM4626771_TTAGTTCAGCTCGCA-1   | GSM4626771 | OA |
| GSM4626771_TTAGTTCGTCCGAATT-1  | GSM4626771 | OA |
| GSM4626771_TTAGTTCGTCCGTTAA-1  | GSM4626771 | OA |
| GSM4626771_TTAGTTCGTTTGTGTG-1  | GSM4626771 | OA |
| GSM4626771_TTAGTTCCTCCTTGTG-1  | GSM4626771 | OA |
| GSM4626771_TTAGTTCCTCTATCCCG-1 | GSM4626771 | OA |
| GSM4626771_TTATGCTAGAAAGTGG-1  | GSM4626771 | OA |
| GSM4626771_TTATGCTAGAGGTTAT-1  | GSM4626771 | OA |
| GSM4626771_TTATGCTAGCCACTAT-1  | GSM4626771 | OA |
| GSM4626771_TTATGCTCACCTGGTG-1  | GSM4626771 | OA |
| GSM4626771_TTATGCTCAGCTGGCT-1  | GSM4626771 | OA |
| GSM4626771_TTATGCTCATTAGCCA-1  | GSM4626771 | OA |
| GSM4626771_TTATGCTGTCTGGAGA-1  | GSM4626771 | OA |
| GSM4626771_TTATGCTGTTCGCTAA-1  | GSM4626771 | OA |
| GSM4626771_TTATGCTTCAGCGATT-1  | GSM4626771 | OA |
| GSM4626771_TTATGCTTCGATAGAA-1  | GSM4626771 | OA |
| GSM4626771_TTATGCTTCGTAGGTT-1  | GSM4626771 | OA |
| GSM4626771_TTCCCAGAGCTAGTCT-1  | GSM4626771 | OA |
| GSM4626771_TTCCCAGAGCTGAAAT-1  | GSM4626771 | OA |
| GSM4626771_TTCCCAGCACCGGAAA-1  | GSM4626771 | OA |
| GSM4626771_TTCCCAGCACGTGAGA-1  | GSM4626771 | OA |
| GSM4626771_TTCCCAGCAGCTTCGG-1  | GSM4626771 | OA |
| GSM4626771_TTCCCAGCAGTACACT-1  | GSM4626771 | OA |
| GSM4626771_TTCCCAGCATATACCG-1  | GSM4626771 | OA |
| GSM4626771_TTCCCAGCATTGAGCT-1  | GSM4626771 | OA |
| GSM4626771_TTCCCAGGTAAGAGGA-1  | GSM4626771 | OA |
| GSM4626771_TTCCCAGGTAGAGTGC-1  | GSM4626771 | OA |
| GSM4626771_TTCCCAGGTGTTGAT-1   | GSM4626771 | OA |
| GSM4626771_TTCCCAGGTTCCCGAG-1  | GSM4626771 | OA |
| GSM4626771_TTCCCAGGTTCCGGCAC-1 | GSM4626771 | OA |
| GSM4626771_TTCCCAGGTTGCGCAC-1  | GSM4626771 | OA |
| GSM4626771_TTCCCAGTCCGCTGTT-1  | GSM4626771 | OA |
| GSM4626771_TTCCCAGTCTCTAAGG-1  | GSM4626771 | OA |
| GSM4626771_TTCCCAGTCTCTGTGCG-1 | GSM4626771 | OA |
| GSM4626771_TTCCCAGTCTGCCCTA-1  | GSM4626771 | OA |
| GSM4626771_TTCCAAGAGAACTGTA-1  | GSM4626771 | OA |
| GSM4626771_TTCCAAGAGACTGGGT-1  | GSM4626771 | OA |
| GSM4626771_TTCCAAGAGATGTAAC-1  | GSM4626771 | OA |
| GSM4626771_TTCCAAGAGTACACCT-1  | GSM4626771 | OA |
| GSM4626771_TTCCAAGTCACTGGGC-1  | GSM4626771 | OA |
| GSM4626771_TTCCGGTCAGAAGGTGA-1 | GSM4626771 | OA |
| GSM4626771_TTCCGGTCAGAATTGTG-1 | GSM4626771 | OA |
| GSM4626771_TTCCGGTCAGTCCCACG-1 | GSM4626771 | OA |
| GSM4626771_TTCCGGTCAGTCCGGTC-1 | GSM4626771 | OA |
| GSM4626771_TTCCGGTCCATACGCCG-1 | GSM4626771 | OA |
| GSM4626771_TTCCGGTCGTAAGAGAG-1 | GSM4626771 | OA |
| GSM4626771_TTCCGGTCGTGCATCTA-1 | GSM4626771 | OA |
| GSM4626771_TTCCGGTCGTGGTGTAG-1 | GSM4626771 | OA |
| GSM4626771_TTCCGGTCTCACTATTC-1 | GSM4626771 | OA |
| GSM4626771_TTCCGGTCTCATGTAGC-1 | GSM4626771 | OA |
| GSM4626771_TTCCGGTCTCCGAAGAG-1 | GSM4626771 | OA |
| GSM4626771_TTCCGGTCTCCTCCTAG-1 | GSM4626771 | OA |
| GSM4626771_TTCCGGTCTCTCATTCA-1 | GSM4626771 | OA |
| GSM4626771_TTCTACACACGTGAGA-1  | GSM4626771 | OA |



|                               |            |    |
|-------------------------------|------------|----|
| GSM4626771_TTCTACACAGGTCGTC-1 | GSM4626771 | OA |
| GSM4626771_TTCTACACATGCTAGT-1 | GSM4626771 | OA |
| GSM4626771_TTCTACACATTCTCAT-1 | GSM4626771 | OA |
| GSM4626771_TTCTACAGTATTACCG-1 | GSM4626771 | OA |
| GSM4626771_TTCTACATCACAAACC-1 | GSM4626771 | OA |
| GSM4626771_TTCTACATCCGAAGAG-1 | GSM4626771 | OA |
| GSM4626771_TTCTACATCGATCCCT-1 | GSM4626771 | OA |
| GSM4626771_TTCTACATCTGATACG-1 | GSM4626771 | OA |
| GSM4626771_TTCTCAAAGAGTCGGT-1 | GSM4626771 | OA |
| GSM4626771_TTCTCAAAGCGTTGCC-1 | GSM4626771 | OA |
| GSM4626771_TTCTCAAAGGGCTCTC-1 | GSM4626771 | OA |
| GSM4626771_TTCTCAAAGGTAGCTG-1 | GSM4626771 | OA |
| GSM4626771_TTCTCAACAAGCGTAG-1 | GSM4626771 | OA |
| GSM4626771_TTCTCAACAATCTACG-1 | GSM4626771 | OA |
| GSM4626771_TTCTCAAGTACATGTC-1 | GSM4626771 | OA |
| GSM4626771_TTCTCAAGTACCGTAT-1 | GSM4626771 | OA |
| GSM4626771_TTCTCAAGTATCAGTC-1 | GSM4626771 | OA |
| GSM4626771_TTCTCAAGTGTGCTG-1  | GSM4626771 | OA |
| GSM4626771_TTCTCAATCTTTAGTC-1 | GSM4626771 | OA |
| GSM4626771_TTCTCCTAGAAACGCC-1 | GSM4626771 | OA |
| GSM4626771_TTCTCCTAGATCTGAA-1 | GSM4626771 | OA |
| GSM4626771_TTCTCCTAGTACTTGC-1 | GSM4626771 | OA |
| GSM4626771_TTCTCCTAGTTGATC-1  | GSM4626771 | OA |
| GSM4626771_TTCTCCTCATGGTAGG-1 | GSM4626771 | OA |
| GSM4626771_TTCTCCTGTACGCTGC-1 | GSM4626771 | OA |
| GSM4626771_TTCTCCTGTAGTAGTA-1 | GSM4626771 | OA |
| GSM4626771_TTCTCCTGTATGAAAC-1 | GSM4626771 | OA |
| GSM4626771_TTCTCCTGTCACTGGC-1 | GSM4626771 | OA |
| GSM4626771_TTCTCCTTCAAACCGT-1 | GSM4626771 | OA |
| GSM4626771_TTCTCCTTCATGCTCC-1 | GSM4626771 | OA |
| GSM4626771_TTCTTAGAGCGTAGTG-1 | GSM4626771 | OA |
| GSM4626771_TTCTTAGAGGAATCGC-1 | GSM4626771 | OA |
| GSM4626771_TTCTTAGAGTTTGCCT-1 | GSM4626771 | OA |
| GSM4626771_TTCTTAGCATCTATGG-1 | GSM4626771 | OA |
| GSM4626771_TTCTTAGCATGTAGTC-1 | GSM4626771 | OA |
| GSM4626771_TTCTTAGGTCCTGCTT-1 | GSM4626771 | OA |
| GSM4626771_TTCTTAGGTCGAACAG-1 | GSM4626771 | OA |
| GSM4626771_TTCTTAGTCGCCTGAG-1 | GSM4626771 | OA |
| GSM4626771_TTCTTAGTCTTCATGT-1 | GSM4626771 | OA |
| GSM4626771_TTGAACGAGAATGTGT-1 | GSM4626771 | OA |
| GSM4626771_TTGAACGAGACAAAGG-1 | GSM4626771 | OA |
| GSM4626771_TTGAACGAGAGGTTGC-1 | GSM4626771 | OA |
| GSM4626771_TTGAACGAGCCAGAAC-1 | GSM4626771 | OA |
| GSM4626771_TTGAACGAGCGGATCA-1 | GSM4626771 | OA |
| GSM4626771_TTGAACGAGCTAGGCA-1 | GSM4626771 | OA |
| GSM4626771_TTGAACGAGGCTATCT-1 | GSM4626771 | OA |
| GSM4626771_TTGAACGAGGGCTTCC-1 | GSM4626771 | OA |
| GSM4626771_TTGAACGAGTCCCACG-1 | GSM4626771 | OA |
| GSM4626771_TTGAACGCACTGTGTA-1 | GSM4626771 | OA |
| GSM4626771_TTGAACGCATAAGACA-1 | GSM4626771 | OA |
| GSM4626771_TTGAACGGTAAGTGTA-1 | GSM4626771 | OA |
| GSM4626771_TTGAACGGTAGCGATG-1 | GSM4626771 | OA |
| GSM4626771_TTGAACGGTAGGACAC-1 | GSM4626771 | OA |
| GSM4626771_TTGAACGGTCCGATCG-1 | GSM4626771 | OA |
| GSM4626771_TTGAACGGTCCGCACT-1 | GSM4626771 | OA |
| GSM4626771_TTGAACGGTCTTGATG-1 | GSM4626771 | OA |
| GSM4626771_TTGAACGGTTCGTCTC-1 | GSM4626771 | OA |

|                                |            |    |
|--------------------------------|------------|----|
| GSM4626771_TTGAACGTCACGCATA-1  | GSM4626771 | OA |
| GSM4626771_TTGACTTAGAAGATTC-1  | GSM4626771 | OA |
| GSM4626771_TTGACTTCAAGGTTCT-1  | GSM4626771 | OA |
| GSM4626771_TTGACTTCAGGCGATA-1  | GSM4626771 | OA |
| GSM4626771_TTGACTTCATTAACCG-1  | GSM4626771 | OA |
| GSM4626771_TTGACTTGTCCGTTAA-1  | GSM4626771 | OA |
| GSM4626771_TTGACTTGTGCCTTGG-1  | GSM4626771 | OA |
| GSM4626771_TTGACTTGTGGTGGA-1   | GSM4626771 | OA |
| GSM4626771_TTGCCGTAGCGTCAAG-1  | GSM4626771 | OA |
| GSM4626771_TTGCCGTCACTTAAGC-1  | GSM4626771 | OA |
| GSM4626771_TTGCCGTCATAAGACA-1  | GSM4626771 | OA |
| GSM4626771_TTGCCGTCATGTCGAT-1  | GSM4626771 | OA |
| GSM4626771_TTGCCGTTCCGGCACA-1  | GSM4626771 | OA |
| GSM4626771_TTGCCGTTCTTAATC-1   | GSM4626771 | OA |
| GSM4626771_TTGCCGTTTCGTATCAG-1 | GSM4626771 | OA |
| GSM4626771_TTGCGTCAGAGGACGG-1  | GSM4626771 | OA |
| GSM4626771_TTGCGTCAGATCCTGT-1  | GSM4626771 | OA |
| GSM4626771_TTGCGTCAGGACGAAA-1  | GSM4626771 | OA |
| GSM4626771_TTGCGTCAGTACGACG-1  | GSM4626771 | OA |
| GSM4626771_TTGCGTCCAATGACCT-1  | GSM4626771 | OA |
| GSM4626771_TTGCGTCCACCTATCC-1  | GSM4626771 | OA |
| GSM4626771_TTGCGTCGTGAGTATA-1  | GSM4626771 | OA |
| GSM4626771_TTGCGTCTCCGAATGT-1  | GSM4626771 | OA |
| GSM4626771_TTGCGTCTCGCTTGTC-1  | GSM4626771 | OA |
| GSM4626771_TTGGAACAGACTTTCG-1  | GSM4626771 | OA |
| GSM4626771_TTGGAACAGCGCTTAT-1  | GSM4626771 | OA |
| GSM4626771_TTGGAACCAAATACAG-1  | GSM4626771 | OA |
| GSM4626771_TTGGAACCAATCCGAT-1  | GSM4626771 | OA |
| GSM4626771_TTGGAACCACCGTTGG-1  | GSM4626771 | OA |
| GSM4626771_TTGGAACCAGGCTGAA-1  | GSM4626771 | OA |
| GSM4626771_TTGGAACGTATATCCG-1  | GSM4626771 | OA |
| GSM4626771_TTGGAACTCTGCAGTA-1  | GSM4626771 | OA |
| GSM4626771_TTGGCAAAGCCACGCT-1  | GSM4626771 | OA |
| GSM4626771_TTGGCAAAGCCATCGC-1  | GSM4626771 | OA |
| GSM4626771_TTGGCAAAGCTCCCAG-1  | GSM4626771 | OA |
| GSM4626771_TTGGCAAAGGGCATGT-1  | GSM4626771 | OA |
| GSM4626771_TTGGCAAAGTACACCT-1  | GSM4626771 | OA |
| GSM4626771_TTGGCAACAATCGAAA-1  | GSM4626771 | OA |
| GSM4626771_TTGGCAAGTGCCTTG-1   | GSM4626771 | OA |
| GSM4626771_TTGGCAATCAGATAAG-1  | GSM4626771 | OA |
| GSM4626771_TTGGCAATCAGTGCAT-1  | GSM4626771 | OA |
| GSM4626771_TTGGCAATCATACGGT-1  | GSM4626771 | OA |
| GSM4626771_TTGGCAATCATGTAGC-1  | GSM4626771 | OA |
| GSM4626771_TTGGCAATCCCAGGTG-1  | GSM4626771 | OA |
| GSM4626771_TTGTAGGAGAATAGGG-1  | GSM4626771 | OA |
| GSM4626771_TTGTAGGAGCCATCGC-1  | GSM4626771 | OA |
| GSM4626771_TTGTAGGCAATCACAC-1  | GSM4626771 | OA |
| GSM4626771_TTGTAGGGTACGACCC-1  | GSM4626771 | OA |
| GSM4626771_TTGTAGGGTGTGGCTC-1  | GSM4626771 | OA |
| GSM4626771_TTGTAGGGTTCATGGT-1  | GSM4626771 | OA |
| GSM4626771_TTGTAGGGTTTAGGAA-1  | GSM4626771 | OA |
| GSM4626771_TTGTAGGTCGCGGATC-1  | GSM4626771 | OA |
| GSM4626771_TTTACTGAGAGATGAG-1  | GSM4626771 | OA |
| GSM4626771_TTTACTGAGCCCAATT-1  | GSM4626771 | OA |
| GSM4626771_TTTACTGCACCACGTG-1  | GSM4626771 | OA |
| GSM4626771_TTTACTGCAGCCTTGG-1  | GSM4626771 | OA |
| GSM4626771_TTTACTGCAGGGATTG-1  | GSM4626771 | OA |

|                                |            |    |
|--------------------------------|------------|----|
| GSM4626771_TTTACTGTCAGTGTTG-1  | GSM4626771 | OA |
| GSM4626771_TTTACTGTCGTACGGC-1  | GSM4626771 | OA |
| GSM4626771_TTTACTGTCTACTTAC-1  | GSM4626771 | OA |
| GSM4626771_TTTACTGTCTGCTGCT-1  | GSM4626771 | OA |
| GSM4626771_TTTACTGTCTTGCCGT-1  | GSM4626771 | OA |
| GSM4626771_TTTATGCAGATCCTGT-1  | GSM4626771 | OA |
| GSM4626771_TTTATGCAGGGAAACA-1  | GSM4626771 | OA |
| GSM4626771_TTTATGCAGGTGATTA-1  | GSM4626771 | OA |
| GSM4626771_TTTATGCAGTATGACA-1  | GSM4626771 | OA |
| GSM4626771_TTTATGCCATTACGAC-1  | GSM4626771 | OA |
| GSM4626771_TTTATGCGTCAACTGT-1  | GSM4626771 | OA |
| GSM4626771_TTTATGCTCACCTTAT-1  | GSM4626771 | OA |
| GSM4626771_TTTATGCTCTATCGCC-1  | GSM4626771 | OA |
| GSM4626771_TTTCCTCAGAAGAAGC-1  | GSM4626771 | OA |
| GSM4626771_TTTCCTCAGAAGGACA-1  | GSM4626771 | OA |
| GSM4626771_TTTCCTCAGTCATGCT-1  | GSM4626771 | OA |
| GSM4626771_TTTCCTCAGTGGACGT-1  | GSM4626771 | OA |
| GSM4626771_TTTCCTCGTGCCTGTG-1  | GSM4626771 | OA |
| GSM4626771_TTTCCTCTCAGTTCGA-1  | GSM4626771 | OA |
| GSM4626771_TTTGCGCAGACGCAAC-1  | GSM4626771 | OA |
| GSM4626771_TTTGCGCAGCACGCCT-1  | GSM4626771 | OA |
| GSM4626771_TTTGCGCAGCTGAACG-1  | GSM4626771 | OA |
| GSM4626771_TTTGCGCAGGATGGTC-1  | GSM4626771 | OA |
| GSM4626771_TTTGCGCCAGATGAGC-1  | GSM4626771 | OA |
| GSM4626771_TTTGCGCCATTATCTC-1  | GSM4626771 | OA |
| GSM4626771_TTTGCGCGTTATCCGA-1  | GSM4626771 | OA |
| GSM4626771_TTTGCGCGTTTACTCT-1  | GSM4626771 | OA |
| GSM4626771_TTTGCGCGTTTGGCGC-1  | GSM4626771 | OA |
| GSM4626771_TTTGCGCTCAATACCG-1  | GSM4626771 | OA |
| GSM4626771_TTTGCGCTCACCGGGT-1  | GSM4626771 | OA |
| GSM4626771_TTTGCGCTCAGGCGAA-1  | GSM4626771 | OA |
| GSM4626771_TTTGCGCTCAGTGCAT-1  | GSM4626771 | OA |
| GSM4626771_TTTGCGCTCCATTAT-1   | GSM4626771 | OA |
| GSM4626771_TTTGCGCTCGGAATCT-1  | GSM4626771 | OA |
| GSM4626771_TTTGGTTAGCACCGTC-1  | GSM4626771 | OA |
| GSM4626771_TTTGGTTAGTTTCCTT-1  | GSM4626771 | OA |
| GSM4626771_TTTGGTTCAAACCTAC-1  | GSM4626771 | OA |
| GSM4626771_TTTGGTTCAACAACCT-1  | GSM4626771 | OA |
| GSM4626771_TTTGGTTGTCGCCATG-1  | GSM4626771 | OA |
| GSM4626771_TTTGGTTGTGTGAATA-1  | GSM4626771 | OA |
| GSM4626771_TTTGGTTTCATGCAAC-1  | GSM4626771 | OA |
| GSM4626771_TTTGGTTTCCGTCAA-1   | GSM4626771 | OA |
| GSM4626771_TTTGGTTTCGATGAGG-1  | GSM4626771 | OA |
| GSM4626771_TTTGTCAAGACAAGCC-1  | GSM4626771 | OA |
| GSM4626771_TTTGTCAAGAGCAATT-1  | GSM4626771 | OA |
| GSM4626771_TTTGTCAAGCGTCTAT-1  | GSM4626771 | OA |
| GSM4626771_TTTGTCAAGTAAGGGCT-1 | GSM4626771 | OA |
| GSM4626771_TTTGTCAAGTCGCGTGT-1 | GSM4626771 | OA |
| GSM4626771_TTTGTCAAGTTGGAGGT-1 | GSM4626771 | OA |
| GSM4626771_TTTGTCATCAGTGCAT-1  | GSM4626771 | OA |
| GSM4626771_TTTGTCATCGAATCCA-1  | GSM4626771 | OA |
| GSM4626771_TTTGTCATCGCCTGAG-1  | GSM4626771 | OA |
| GSM4626771_TTTGTCATCTCGATGA-1  | GSM4626771 | OA |

---

**Supplementary Table 2: Sample information of microarray**

| Number | Sample     | Type                                                              | Batch    |
|--------|------------|-------------------------------------------------------------------|----------|
| 1      | GSM1332201 | disease state: healthy control                                    | GSE55235 |
| 2      | GSM1332202 | disease state: healthy control                                    | GSE55235 |
| 3      | GSM1332203 | disease state: healthy control                                    | GSE55235 |
| 4      | GSM1332204 | disease state: healthy control                                    | GSE55235 |
| 5      | GSM1332205 | disease state: healthy control                                    | GSE55235 |
| 6      | GSM1332206 | disease state: healthy control                                    | GSE55235 |
| 7      | GSM1332207 | disease state: healthy control                                    | GSE55235 |
| 8      | GSM1332208 | disease state: healthy control                                    | GSE55235 |
| 9      | GSM1332209 | disease state: healthy control                                    | GSE55235 |
| 10     | GSM1332210 | disease state: healthy control                                    | GSE55235 |
| 11     | GSM1332211 | disease state: osteoarthritis                                     | GSE55235 |
| 12     | GSM1332212 | disease state: synovial tissue isolated from osteoarthritic joint | GSE55235 |
| 13     | GSM1332213 | disease state: synovial tissue isolated from osteoarthritic joint | GSE55235 |
| 14     | GSM1332214 | disease state: synovial tissue isolated from osteoarthritic joint | GSE55235 |
| 15     | GSM1332215 | disease state: synovial tissue isolated from osteoarthritic joint | GSE55235 |
| 16     | GSM1332216 | disease state: synovial tissue isolated from osteoarthritic joint | GSE55235 |
| 17     | GSM1332217 | disease state: synovial tissue isolated from osteoarthritic joint | GSE55235 |
| 18     | GSM1332218 | disease state: synovial tissue isolated from osteoarthritic joint | GSE55235 |
| 19     | GSM1332219 | disease state: synovial tissue isolated from osteoarthritic joint | GSE55235 |
| 20     | GSM1332220 | disease state: synovial tissue isolated from osteoarthritic joint | GSE55235 |
| 21     | GSM1332221 | disease state: rheumatoid arthritis                               | GSE55235 |
| 22     | GSM1332222 | disease state: rheumatoid arthritis                               | GSE55235 |
| 23     | GSM1332223 | disease state: rheumatoid arthritis                               | GSE55235 |
| 24     | GSM1332224 | disease state: rheumatoid arthritis                               | GSE55235 |
| 25     | GSM1332225 | disease state: rheumatoid arthritis                               | GSE55235 |
| 26     | GSM1332226 | disease state: rheumatoid arthritis                               | GSE55235 |
| 27     | GSM1332227 | disease state: rheumatoid arthritis                               | GSE55235 |
| 28     | GSM1332228 | disease state: rheumatoid arthritis                               | GSE55235 |
| 29     | GSM1332229 | disease state: rheumatoid arthritis                               | GSE55235 |
| 30     | GSM1332230 | disease state: rheumatoid arthritis                               | GSE55235 |
| 31     | GSM1337304 | clinical status: normal control                                   | GSE55457 |
| 32     | GSM1337305 | clinical status: normal control                                   | GSE55457 |
| 33     | GSM1337306 | clinical status: normal control                                   | GSE55457 |
| 34     | GSM1337307 | clinical status: normal control                                   | GSE55457 |
| 35     | GSM1337308 | clinical status: normal control                                   | GSE55457 |
| 36     | GSM1337309 | clinical status: normal control                                   | GSE55457 |
| 37     | GSM1337310 | clinical status: normal control                                   | GSE55457 |
| 38     | GSM1337311 | clinical status: normal control                                   | GSE55457 |
| 39     | GSM1337312 | clinical status: normal control                                   | GSE55457 |
| 40     | GSM1337313 | clinical status: normal control                                   | GSE55457 |
| 41     | GSM1337314 | clinical status: rheumatoid arthritis                             | GSE55457 |
| 42     | GSM1337315 | clinical status: rheumatoid arthritis                             | GSE55457 |
| 43     | GSM1337316 | clinical status: rheumatoid arthritis                             | GSE55457 |
| 44     | GSM1337317 | clinical status: rheumatoid arthritis                             | GSE55457 |
| 45     | GSM1337318 | clinical status: rheumatoid arthritis                             | GSE55457 |
| 46     | GSM1337319 | clinical status: rheumatoid arthritis                             | GSE55457 |
| 47     | GSM1337320 | clinical status: rheumatoid arthritis                             | GSE55457 |
| 48     | GSM1337321 | clinical status: rheumatoid arthritis                             | GSE55457 |
| 49     | GSM1337322 | clinical status: rheumatoid arthritis                             | GSE55457 |
| 50     | GSM1337323 | clinical status: rheumatoid arthritis                             | GSE55457 |
| 51     | GSM1337324 | clinical status: rheumatoid arthritis                             | GSE55457 |
| 52     | GSM1337325 | clinical status: rheumatoid arthritis                             | GSE55457 |
| 53     | GSM1337326 | clinical status: rheumatoid arthritis                             | GSE55457 |
| 54     | GSM1337327 | clinical status: osteoarthritis                                   | GSE55457 |
| 55     | GSM1337328 | clinical status: osteoarthritis                                   | GSE55457 |

|    |            |                                       |          |
|----|------------|---------------------------------------|----------|
| 56 | GSM1337329 | clinical status: osteoarthritis       | GSE55457 |
| 57 | GSM1337330 | clinical status: osteoarthritis       | GSE55457 |
| 58 | GSM1337331 | clinical status: osteoarthritis       | GSE55457 |
| 59 | GSM1337332 | clinical status: osteoarthritis       | GSE55457 |
| 60 | GSM1337333 | clinical status: osteoarthritis       | GSE55457 |
| 61 | GSM1337334 | clinical status: osteoarthritis       | GSE55457 |
| 62 | GSM1337335 | clinical status: osteoarthritis       | GSE55457 |
| 63 | GSM1337336 | clinical status: osteoarthritis       | GSE55457 |
| 64 | GSM1339618 | clinical status: rheumatoid arthritis | GSE55584 |
| 65 | GSM1339619 | clinical status: rheumatoid arthritis | GSE55584 |
| 66 | GSM1339620 | clinical status: rheumatoid arthritis | GSE55584 |
| 67 | GSM1339621 | clinical status: rheumatoid arthritis | GSE55584 |
| 68 | GSM1339622 | clinical status: rheumatoid arthritis | GSE55584 |
| 69 | GSM1339623 | clinical status: rheumatoid arthritis | GSE55584 |
| 70 | GSM1339624 | clinical status: rheumatoid arthritis | GSE55584 |
| 71 | GSM1339625 | clinical status: rheumatoid arthritis | GSE55584 |
| 72 | GSM1339626 | clinical status: rheumatoid arthritis | GSE55584 |
| 73 | GSM1339627 | clinical status: rheumatoid arthritis | GSE55584 |
| 74 | GSM1339628 | clinical status: osteoarthritis       | GSE55584 |
| 75 | GSM1339629 | clinical status: osteoarthritis       | GSE55584 |
| 76 | GSM1339630 | clinical status: osteoarthritis       | GSE55584 |
| 77 | GSM1339631 | clinical status: osteoarthritis       | GSE55584 |
| 78 | GSM1339632 | clinical status: osteoarthritis       | GSE55584 |
| 79 | GSM1339633 | clinical status: osteoarthritis       | GSE55584 |

---

**Supplementary Table 3:** The patient information

| Characteristic |               | RA patients (n =10) | OA patients (n =10) |
|----------------|---------------|---------------------|---------------------|
| Demographic    | Age (average) | 57.47±4.75          | 68.35±6.20          |
|                | Female (n)    | 7                   | 5                   |
| Disease status | CRP (mg/mL)   | 39.45±17.67         | 2.24±1.53           |
|                | APCA (U/mL)   | 42.57±15.38         | 13.75±7.94          |
|                | RF (IU/mL)    | 69.36±42.36         | 9.73±3.32           |
|                | ESR (mm/h)    | 136.67±37.58        | 18.25±11.46         |

**Supplementary Table 4: DEGs of per celltype**

| Gene     | P_val | Avg log2FC  | Pct.1 | Pct.2 | P_val_adj | Cluster | Gene symbol |
|----------|-------|-------------|-------|-------|-----------|---------|-------------|
| FRZB     | 0     | 1.186182827 | 0.949 | 0.763 | 0         | HomC    | FRZB        |
| JUN      | 0     | 1.059873432 | 0.971 | 0.907 | 0         | HomC    | JUN         |
| CFH      | 0     | 1.00083053  | 0.986 | 0.93  | 0         | HomC    | CFH         |
| RASD1    | 0     | 0.936853491 | 0.791 | 0.575 | 0         | HomC    | RASD1       |
| FOSB     | 0     | 0.914711489 | 0.921 | 0.823 | 0         | HomC    | FOSB        |
| ATF3     | 0     | 0.907106886 | 0.749 | 0.516 | 0         | HomC    | ATF3        |
| ZFP36    | 0     | 0.862727648 | 0.988 | 0.943 | 0         | HomC    | ZFP36       |
| NR4A1    | 0     | 0.818653735 | 0.756 | 0.522 | 0         | HomC    | NR4A1       |
| GEM      | 0     | 0.815087373 | 0.915 | 0.749 | 0         | HomC    | GEM         |
| BTG2     | 0     | 0.813867008 | 0.843 | 0.678 | 0         | HomC    | BTG2        |
| CRISPLD1 | 0     | 0.811402539 | 0.663 | 0.44  | 0         | HomC    | CRISPLD1    |
| CLEC3A   | 0     | 0.810506418 | 0.873 | 0.695 | 0         | HomC    | CLEC3A      |
| JUNB     | 0     | 0.804833346 | 0.999 | 0.991 | 0         | HomC    | JUNB        |
| FOS      | 0     | 0.786021238 | 0.994 | 0.973 | 0         | HomC    | FOS         |
| HAPLN1   | 0     | 0.775044995 | 0.976 | 0.94  | 0         | HomC    | HAPLN1      |
| COL9A3   | 0     | 0.737972398 | 0.974 | 0.867 | 0         | HomC    | COL9A3      |
| GDF10    | 0     | 0.70426524  | 0.841 | 0.551 | 0         | HomC    | GDF10       |
| SRSF7    | 0     | 0.695515163 | 0.924 | 0.831 | 0         | HomC    | SRSF7       |
| TUBB2B   | 0     | 0.688987457 | 0.817 | 0.546 | 0         | HomC    | TUBB2B      |
| IER2     | 0     | 0.679805737 | 0.942 | 0.839 | 0         | HomC    | IER2        |
| MATN3    | 0     | 0.643029836 | 0.745 | 0.474 | 0         | HomC    | MATN3       |
| ACAN     | 0     | 0.619464693 | 0.987 | 0.96  | 0         | HomC    | ACAN        |
| EGR1     | 0     | 0.61083948  | 0.968 | 0.893 | 0         | HomC    | EGR1        |
| NR4A2    | 0     | 0.603780373 | 0.76  | 0.564 | 0         | HomC    | NR4A2       |
| ACTG1    | 0     | 0.592070591 | 1     | 0.993 | 0         | HomC    | ACTG1       |
| RGS3     | 0     | 0.584316876 | 0.892 | 0.776 | 0         | HomC    | RGS3        |
| COL9A2   | 0     | 0.584000468 | 0.847 | 0.628 | 0         | HomC    | COL9A2      |
| SCRG1    | 0     | 0.56891797  | 0.993 | 0.994 | 0         | HomC    | SCRG1       |
| WWP2     | 0     | 0.567581267 | 0.925 | 0.799 | 0         | HomC    | WWP2        |
| RARRES2  | 0     | 0.566546106 | 0.546 | 0.284 | 0         | HomC    | RARRES2     |
| PLA2G2A  | 0     | 0.558023487 | 0.994 | 0.988 | 0         | HomC    | PLA2G2A     |
| TSC22D1  | 0     | 0.536563519 | 0.991 | 0.967 | 0         | HomC    | TSC22D1     |
| ACTB     | 0     | 0.525948814 | 0.999 | 0.996 | 0         | HomC    | ACTB        |
| MCL1     | 0     | 0.520773686 | 0.929 | 0.823 | 0         | HomC    | MCL1        |
| SERPINA5 | 0     | 0.503328404 | 0.929 | 0.809 | 0         | HomC    | SERPINA5    |
| WIF1     | 0     | 0.494618717 | 0.396 | 0.179 | 0         | HomC    | WIF1        |
| SPTSSB   | 0     | 0.465089122 | 0.336 | 0.132 | 0         | HomC    | SPTSSB      |
| S100B    | 0     | 0.451177242 | 0.974 | 0.913 | 0         | HomC    | S100B       |
| COL9A1   | 0     | 0.41998268  | 0.402 | 0.173 | 0         | HomC    | COL9A1      |
| CYTL1    | 0     | 0.418704126 | 0.963 | 0.866 | 0         | HomC    | CYTL1       |
| NDRG2    | 0     | 0.41650569  | 0.825 | 0.62  | 0         | HomC    | NDRG2       |
| COL11A2  | 0     | 0.391436335 | 0.891 | 0.689 | 0         | HomC    | COL11A2     |
| C2orf82  | 0     | 0.390273122 | 0.984 | 0.931 | 0         | HomC    | C2orf82     |
| LGI4     | 0     | 0.376332707 | 0.377 | 0.157 | 0         | HomC    | LGI4        |
| CD63     | 0     | -0.38438878 | 0.999 | 0.997 | 0         | HomC    | CD63        |
| THY1     | 0     | -0.41300382 | 0.078 | 0.297 | 0         | HomC    | THY1        |
| FAP      | 0     | -0.47739223 | 0.141 | 0.371 | 0         | HomC    | FAP         |
| COL15A1  | 0     | -0.56252816 | 0.207 | 0.433 | 0         | HomC    | COL15A1     |
| S100A6   | 0     | -0.63463644 | 1     | 0.999 | 0         | HomC    | S100A6      |
| LUM      | 0     | -0.68804466 | 0.998 | 1     | 0         | HomC    | LUM         |
| SMOC1    | 0     | -0.6969477  | 0.315 | 0.554 | 0         | HomC    | SMOC1       |
| ABI3BP   | 0     | -0.98750661 | 0.31  | 0.561 | 0         | HomC    | ABI3BP      |
| DPT      | 0     | -1.22632005 | 0.215 | 0.438 | 0         | HomC    | DPT         |
| FN1      | 0     | -1.23507215 | 0.999 | 0.999 | 0         | HomC    | FN1         |
| TNC      | 0     | -1.36295684 | 0.286 | 0.604 | 0         | HomC    | TNC         |
| TGFBI    | 0     | -1.47997456 | 0.182 | 0.478 | 0         | HomC    | TGFBI       |
| ASPN     | 0     | -1.65869405 | 0.479 | 0.664 | 0         | HomC    | ASPN        |
| HTRA1    | 0     | -1.9211366  | 0.761 | 0.851 | 0         | HomC    | HTRA1       |

|           |           |             |       |       |           |      |           |
|-----------|-----------|-------------|-------|-------|-----------|------|-----------|
| CRTAC1    | 0         | -1.96462781 | 0.643 | 0.799 | 0         | HomC | CRTAC1    |
| CRLF1     | 1.15E-307 | -0.77288525 | 0.1   | 0.308 | 2.89E-303 | HomC | CRLF1     |
| MIR24-2   | 4.94E-305 | 0.600928446 | 0.817 | 0.633 | 1.24E-300 | HomC | MIR24-2   |
| CNN2      | 2.77E-304 | 0.349454658 | 0.479 | 0.256 | 6.98E-300 | HomC | CNN2      |
| ITM2A     | 3.25E-304 | 0.490018271 | 0.823 | 0.644 | 8.18E-300 | HomC | ITM2A     |
| GPC6      | 4.10E-299 | 0.404428089 | 0.849 | 0.691 | 1.03E-294 | HomC | GPC6      |
| STC2      | 6.28E-299 | 0.59421962  | 0.605 | 0.364 | 1.58E-294 | HomC | STC2      |
| CHAD      | 6.01E-298 | 0.326378063 | 0.967 | 0.825 | 1.51E-293 | HomC | CHAD      |
| ITM2C     | 4.64E-296 | 0.40305703  | 0.974 | 0.928 | 1.17E-291 | HomC | ITM2C     |
| CNTFR     | 3.59E-294 | 0.256892086 | 0.296 | 0.111 | 9.04E-290 | HomC | CNTFR     |
| COL1A2    | 5.48E-292 | -1.35431058 | 0.378 | 0.583 | 1.38E-287 | HomC | COL1A2    |
| C11orf96  | 3.88E-288 | 0.602907067 | 0.615 | 0.421 | 9.77E-284 | HomC | C11orf96  |
| CHRDL2    | 1.33E-280 | 0.843085938 | 0.407 | 0.2   | 3.35E-276 | HomC | CHRDL2    |
| IDI1      | 5.55E-279 | 0.519840811 | 0.711 | 0.537 | 1.40E-274 | HomC | IDI1      |
| S100A4    | 1.49E-278 | -1.50887207 | 0.511 | 0.662 | 3.75E-274 | HomC | S100A4    |
| NT5E      | 8.69E-277 | -0.50610889 | 0.343 | 0.538 | 2.19E-272 | HomC | NT5E      |
| MDFI      | 6.36E-276 | 0.431787412 | 0.831 | 0.652 | 1.60E-271 | HomC | MDFI      |
| CDKN1A    | 3.07E-275 | 0.487163854 | 0.909 | 0.806 | 7.73E-271 | HomC | CDKN1A    |
| LDLR      | 1.96E-273 | 0.458248688 | 0.537 | 0.336 | 4.93E-269 | HomC | LDLR      |
| TRPV4     | 1.18E-271 | 0.400684735 | 0.828 | 0.649 | 2.97E-267 | HomC | TRPV4     |
| F5        | 5.52E-269 | -0.27875733 | 0.038 | 0.212 | 1.39E-264 | HomC | F5        |
| FBXO2     | 2.57E-268 | 0.387665967 | 0.937 | 0.841 | 6.49E-264 | HomC | FBXO2     |
| COL6A3    | 2.74E-267 | -0.92902332 | 0.448 | 0.621 | 6.91E-263 | HomC | COL6A3    |
| PLP2      | 5.37E-265 | -0.44247093 | 0.848 | 0.895 | 1.35E-260 | HomC | PLP2      |
| CAPS      | 2.77E-263 | -0.4971986  | 0.254 | 0.46  | 6.97E-259 | HomC | CAPS      |
| TNFAIP6   | 5.27E-260 | -1.56617831 | 0.076 | 0.256 | 1.33E-255 | HomC | TNFAIP6   |
| PTGES     | 6.18E-259 | -0.75632021 | 0.236 | 0.432 | 1.56E-254 | HomC | PTGES     |
| P4HA3     | 1.74E-258 | -0.28730722 | 0.062 | 0.244 | 4.38E-254 | HomC | P4HA3     |
| SRSF5     | 4.88E-253 | 0.301112875 | 0.994 | 0.98  | 1.23E-248 | HomC | SRSF5     |
| SLC14A1   | 1.23E-252 | 0.410647759 | 0.578 | 0.35  | 3.10E-248 | HomC | SLC14A1   |
| TIMP1     | 1.67E-252 | -0.86063542 | 0.996 | 0.995 | 4.21E-248 | HomC | TIMP1     |
| PHLDA1    | 2.12E-252 | 0.598177115 | 0.829 | 0.707 | 5.34E-248 | HomC | PHLDA1    |
| FXYD1     | 3.41E-244 | 0.446193754 | 0.835 | 0.706 | 8.60E-240 | HomC | FXYD1     |
| SRSF3     | 7.37E-244 | 0.328078335 | 0.986 | 0.953 | 1.86E-239 | HomC | SRSF3     |
| SDC2      | 2.26E-242 | 0.343997422 | 0.982 | 0.95  | 5.70E-238 | HomC | SDC2      |
| MST4      | 4.02E-242 | 0.398171741 | 0.709 | 0.524 | 1.01E-237 | HomC | MST4      |
| ITGB5     | 6.16E-240 | -0.41235641 | 0.16  | 0.354 | 1.55E-235 | HomC | ITGB5     |
| SPINT2    | 9.56E-240 | 0.274704502 | 0.96  | 0.88  | 2.41E-235 | HomC | SPINT2    |
| NFATC1    | 2.03E-239 | 0.434682029 | 0.686 | 0.512 | 5.12E-235 | HomC | NFATC1    |
| S100A11   | 5.17E-237 | -0.35835824 | 0.958 | 0.968 | 1.30E-232 | HomC | S100A11   |
| PLAUR     | 1.09E-235 | -0.43176985 | 0.196 | 0.394 | 2.75E-231 | HomC | PLAUR     |
| CD151     | 1.20E-233 | -0.4606458  | 0.802 | 0.856 | 3.02E-229 | HomC | CD151     |
| TAGLN2    | 2.97E-233 | -0.48474243 | 0.734 | 0.82  | 7.47E-229 | HomC | TAGLN2    |
| TF        | 8.02E-233 | 0.568635548 | 0.669 | 0.473 | 2.02E-228 | HomC | TF        |
| PPP1R3C   | 1.46E-226 | 0.626551128 | 0.794 | 0.657 | 3.69E-222 | HomC | PPP1R3C   |
| CLU       | 2.76E-225 | -0.71649099 | 1     | 1     | 6.95E-221 | HomC | CLU       |
| ATP5E     | 1.27E-220 | -0.35025808 | 0.958 | 0.956 | 3.21E-216 | HomC | ATP5E     |
| COL3A1    | 2.42E-220 | -1.56208363 | 0.733 | 0.802 | 6.11E-216 | HomC | COL3A1    |
| RPL28     | 5.98E-218 | -0.25464317 | 0.999 | 0.999 | 1.51E-213 | HomC | RPL28     |
| CSRNP1    | 9.59E-218 | 0.357200449 | 0.813 | 0.666 | 2.42E-213 | HomC | CSRNP1    |
| OGN       | 4.90E-217 | -0.77822724 | 0.767 | 0.834 | 1.24E-212 | HomC | OGN       |
| METTL7A   | 1.14E-216 | 0.377363776 | 0.648 | 0.457 | 2.88E-212 | HomC | METTL7A   |
| ANKH      | 8.57E-216 | -0.50993978 | 0.675 | 0.769 | 2.16E-211 | HomC | ANKH      |
| THBS3     | 1.71E-215 | -0.37550055 | 0.213 | 0.398 | 4.30E-211 | HomC | THBS3     |
| EIF4A2    | 1.74E-213 | 0.302022245 | 0.984 | 0.959 | 4.40E-209 | HomC | EIF4A2    |
| TNXB      | 4.47E-213 | -0.61626344 | 0.194 | 0.375 | 1.13E-208 | HomC | TNXB      |
| DIO2      | 2.32E-212 | -0.46897919 | 0.115 | 0.288 | 5.85E-208 | HomC | DIO2      |
| SETD5-AS1 | 1.59E-209 | 0.343880029 | 0.789 | 0.637 | 4.00E-205 | HomC | SETD5-AS1 |
| COL5A1    | 5.05E-209 | -0.62771389 | 0.424 | 0.577 | 1.27E-204 | HomC | COL5A1    |
| COL6A1    | 5.13E-208 | -0.80696997 | 0.817 | 0.849 | 1.29E-203 | HomC | COL6A1    |



|               |           |             |       |       |           |      |               |
|---------------|-----------|-------------|-------|-------|-----------|------|---------------|
| BHLHE40       | 5.36E-207 | 0.549745717 | 0.865 | 0.768 | 1.35E-202 | HomC | BHLHE40       |
| LTBP2         | 1.15E-205 | -0.40814208 | 0.25  | 0.437 | 2.91E-201 | HomC | LTBP2         |
| PMP22         | 1.18E-205 | -0.41291802 | 0.866 | 0.911 | 2.98E-201 | HomC | PMP22         |
| GREM1         | 2.40E-204 | 0.525763191 | 0.38  | 0.204 | 6.05E-200 | HomC | GREM1         |
| NBL1          | 4.33E-204 | -0.4824654  | 0.06  | 0.212 | 1.09E-199 | HomC | NBL1          |
| JUND          | 5.80E-204 | 0.424247203 | 0.865 | 0.777 | 1.46E-199 | HomC | JUND          |
| MT-CYB        | 4.61E-203 | -0.41857044 | 0.94  | 0.95  | 1.16E-198 | HomC | MT-CYB        |
| CHI3L2        | 1.14E-202 | -1.61066867 | 0.864 | 0.891 | 2.88E-198 | HomC | CHI3L2        |
| CCNL1         | 6.17E-202 | 0.411586613 | 0.922 | 0.854 | 1.56E-197 | HomC | CCNL1         |
| SNHG8         | 1.73E-201 | 0.328225838 | 0.964 | 0.914 | 4.37E-197 | HomC | SNHG8         |
| AKR1C2        | 6.57E-200 | -0.4786715  | 0.333 | 0.519 | 1.65E-195 | HomC | AKR1C2        |
| GJA1          | 1.96E-196 | -0.31107789 | 0.152 | 0.326 | 4.95E-192 | HomC | GJA1          |
| MT-ATP6       | 1.08E-193 | -0.42050314 | 0.944 | 0.952 | 2.73E-189 | HomC | MT-ATP6       |
| PPP1R15A      | 2.07E-193 | 0.557960791 | 0.827 | 0.716 | 5.20E-189 | HomC | PPP1R15A      |
| SMOC2         | 2.92E-193 | 0.396979051 | 0.96  | 0.882 | 7.36E-189 | HomC | SMOC2         |
| FOXA3         | 4.62E-193 | 0.337095036 | 0.555 | 0.373 | 1.16E-188 | HomC | FOXA3         |
| REXO2         | 2.37E-192 | -0.32602427 | 0.833 | 0.884 | 5.96E-188 | HomC | REXO2         |
| CD68          | 7.66E-192 | -0.32868485 | 0.307 | 0.48  | 1.93E-187 | HomC | CD68          |
| TPD52L1       | 1.70E-190 | 0.464609895 | 0.849 | 0.749 | 4.28E-186 | HomC | TPD52L1       |
| DDIT4         | 4.54E-190 | 0.775146004 | 0.634 | 0.476 | 1.14E-185 | HomC | DDIT4         |
| NTN1          | 1.88E-189 | -0.25812013 | 0.078 | 0.233 | 4.74E-185 | HomC | NTN1          |
| FAM134B       | 2.76E-189 | -0.38324983 | 0.338 | 0.508 | 6.95E-185 | HomC | FAM134B       |
| EIF5          | 1.24E-187 | 0.298879358 | 0.971 | 0.936 | 3.13E-183 | HomC | EIF5          |
| DDIT3         | 1.36E-185 | 0.404534755 | 0.834 | 0.706 | 3.42E-181 | HomC | DDIT3         |
| H3F3B         | 6.59E-185 | 0.312540002 | 1     | 0.999 | 1.66E-180 | HomC | H3F3B         |
| PDLIM7        | 2.82E-183 | -0.29289749 | 0.199 | 0.373 | 7.10E-179 | HomC | PDLIM7        |
| HMGCS1        | 6.99E-183 | 0.55956864  | 0.52  | 0.355 | 1.76E-178 | HomC | HMGCS1        |
| MT-CO2        | 5.92E-180 | -0.4093442  | 0.944 | 0.952 | 1.49E-175 | HomC | MT-CO2        |
| ITPRIP        | 1.48E-179 | 0.267048212 | 0.401 | 0.234 | 3.73E-175 | HomC | ITPRIP        |
| TPM4          | 4.49E-178 | 0.439091302 | 0.733 | 0.616 | 1.13E-173 | HomC | TPM4          |
| VCAM1         | 8.07E-178 | -0.79270632 | 0.076 | 0.22  | 2.03E-173 | HomC | VCAM1         |
| DUSP14        | 9.63E-178 | 0.399795997 | 0.701 | 0.566 | 2.43E-173 | HomC | DUSP14        |
| GAS1          | 1.13E-175 | -0.50033079 | 0.309 | 0.476 | 2.85E-171 | HomC | GAS1          |
| ANK3          | 2.78E-175 | -0.34017183 | 0.228 | 0.405 | 7.01E-171 | HomC | ANK3          |
| COL6A2        | 3.51E-174 | -0.70262429 | 0.884 | 0.889 | 8.85E-170 | HomC | COL6A2        |
| MT-CO3        | 1.49E-173 | -0.41211779 | 0.948 | 0.953 | 3.76E-169 | HomC | MT-CO3        |
| RP11-983P16.4 | 4.52E-173 | 0.272843149 | 0.67  | 0.5   | 1.14E-168 | HomC | RP11-983P16.4 |
| ITM2B         | 1.23E-172 | -0.26896352 | 0.998 | 0.999 | 3.11E-168 | HomC | ITM2B         |
| ADM           | 3.95E-172 | 0.410743316 | 0.608 | 0.432 | 9.96E-168 | HomC | ADM           |
| ECM1          | 5.94E-171 | -0.31835949 | 0.058 | 0.193 | 1.50E-166 | HomC | ECM1          |
| TSPYL2        | 7.74E-171 | 0.311091949 | 0.62  | 0.458 | 1.95E-166 | HomC | TSPYL2        |
| PPP1R10       | 7.21E-170 | 0.306491651 | 0.694 | 0.542 | 1.82E-165 | HomC | PPP1R10       |
| CTA-29F11.1   | 8.02E-170 | 0.262047054 | 0.519 | 0.34  | 2.02E-165 | HomC | CTA-29F11.1   |
| HSD3B7        | 1.83E-169 | -0.26116687 | 0.056 | 0.189 | 4.60E-165 | HomC | HSD3B7        |
| MRC2          | 3.62E-169 | -0.34179278 | 0.431 | 0.588 | 9.12E-165 | HomC | MRC2          |
| SCIN          | 7.21E-169 | 0.284573599 | 0.629 | 0.46  | 1.82E-164 | HomC | SCIN          |
| MMP3          | 3.54E-168 | 0.331818614 | 0.678 | 0.507 | 8.91E-164 | HomC | MMP3          |
| LTBP3         | 1.14E-167 | -0.35480181 | 0.423 | 0.572 | 2.88E-163 | HomC | LTBP3         |
| CYR61         | 4.49E-167 | 0.653022378 | 0.957 | 0.934 | 1.13E-162 | HomC | CYR61         |
| MEG3          | 1.63E-166 | 0.523890993 | 0.628 | 0.469 | 4.10E-162 | HomC | MEG3          |
| MXRA5         | 7.91E-166 | -0.38637503 | 0.13  | 0.281 | 1.99E-161 | HomC | MXRA5         |
| S100A10       | 8.71E-166 | -0.46526831 | 0.995 | 0.993 | 2.19E-161 | HomC | S100A10       |
| CLIC3         | 1.93E-165 | -0.35274893 | 0.062 | 0.195 | 4.85E-161 | HomC | CLIC3         |
| TTLL7         | 4.82E-165 | 0.253285425 | 0.504 | 0.333 | 1.21E-160 | HomC | TTLL7         |
| CD83          | 7.32E-165 | 0.384487366 | 0.256 | 0.124 | 1.84E-160 | HomC | CD83          |
| SERTAD4-AS1   | 8.08E-160 | 0.359374132 | 0.732 | 0.613 | 2.03E-155 | HomC | SERTAD4-AS1   |
| INSIG1        | 3.78E-158 | 0.416889807 | 0.607 | 0.453 | 9.52E-154 | HomC | INSIG1        |
| RBP4          | 4.60E-158 | 0.322001534 | 0.805 | 0.663 | 1.16E-153 | HomC | RBP4          |
| CTH           | 7.69E-158 | 0.260272746 | 0.295 | 0.156 | 1.94E-153 | HomC | CTH           |
| ADAMTS6       | 8.24E-158 | -0.42224605 | 0.309 | 0.463 | 2.08E-153 | HomC | ADAMTS6       |

|          |           |             |       |       |           |      |          |
|----------|-----------|-------------|-------|-------|-----------|------|----------|
| PRKCDBP  | 7.80E-156 | -0.33412328 | 0.719 | 0.794 | 1.96E-151 | HomC | PRKCDBP  |
| CCND1    | 1.70E-153 | -0.28527181 | 0.061 | 0.189 | 4.30E-149 | HomC | CCND1    |
| XBP1     | 3.18E-151 | 0.285350235 | 0.963 | 0.93  | 8.00E-147 | HomC | XBP1     |
| CD55     | 3.37E-151 | -1.15659076 | 0.681 | 0.74  | 8.50E-147 | HomC | CD55     |
| TMEM100  | 2.94E-150 | -0.25653721 | 0.098 | 0.236 | 7.40E-146 | HomC | TMEM100  |
| SOX9     | 1.53E-149 | 0.368907712 | 0.8   | 0.693 | 3.86E-145 | HomC | SOX9     |
| TREM1    | 3.58E-148 | -0.33827726 | 0.02  | 0.121 | 9.01E-144 | HomC | TREM1    |
| ISLR     | 2.90E-147 | -0.54626818 | 0.707 | 0.774 | 7.30E-143 | HomC | ISLR     |
| WSB1     | 3.53E-147 | 0.267845624 | 0.871 | 0.779 | 8.90E-143 | HomC | WSB1     |
| ADAMTS5  | 2.67E-146 | -0.29572623 | 0.054 | 0.173 | 6.72E-142 | HomC | ADAMTS5  |
| ANGPTL2  | 1.07E-145 | -0.30663626 | 0.852 | 0.923 | 2.71E-141 | HomC | ANGPTL2  |
| TM4SF1   | 3.17E-145 | -0.28018316 | 0.524 | 0.672 | 7.98E-141 | HomC | TM4SF1   |
| CSRP1    | 4.09E-145 | 0.34115411  | 0.749 | 0.641 | 1.03E-140 | HomC | CSRP1    |
| GADD45A  | 1.78E-144 | 0.302639973 | 0.586 | 0.436 | 4.49E-140 | HomC | GADD45A  |
| NR1D1    | 3.34E-144 | 0.391600183 | 0.761 | 0.655 | 8.41E-140 | HomC | NR1D1    |
| IGFBP4   | 6.13E-144 | -0.29745597 | 0.101 | 0.238 | 1.54E-139 | HomC | IGFBP4   |
| RABAC1   | 2.87E-143 | -0.27747672 | 0.967 | 0.96  | 7.24E-139 | HomC | RABAC1   |
| SNAI2    | 1.13E-142 | 0.372128843 | 0.683 | 0.551 | 2.85E-138 | HomC | SNAI2    |
| STK38L   | 7.37E-140 | 0.329077928 | 0.764 | 0.644 | 1.86E-135 | HomC | STK38L   |
| GPX3     | 1.93E-137 | 0.392342549 | 0.991 | 0.988 | 4.87E-133 | HomC | GPX3     |
| SERPINE2 | 3.72E-137 | -0.80386633 | 0.546 | 0.647 | 9.37E-133 | HomC | SERPINE2 |
| LDLRAD4  | 8.86E-137 | 0.318737913 | 0.696 | 0.581 | 2.23E-132 | HomC | LDLRAD4  |
| DUSP1    | 1.34E-136 | 0.402871323 | 0.837 | 0.749 | 3.39E-132 | HomC | DUSP1    |
| DKK1     | 1.73E-136 | 0.453492602 | 0.274 | 0.145 | 4.35E-132 | HomC | DKK1     |
| ARPC1B   | 2.34E-136 | -0.35192359 | 0.545 | 0.653 | 5.90E-132 | HomC | ARPC1B   |
| CAPG     | 2.41E-135 | -0.35304884 | 0.538 | 0.644 | 6.08E-131 | HomC | CAPG     |
| RAMP3    | 2.92E-135 | 0.26689421  | 0.355 | 0.213 | 7.35E-131 | HomC | RAMP3    |
| IFITM3   | 3.60E-135 | -0.41312116 | 0.968 | 0.973 | 9.06E-131 | HomC | IFITM3   |
| KLF10    | 1.43E-134 | 0.331963994 | 0.69  | 0.555 | 3.61E-130 | HomC | KLF10    |
| POLR2L   | 1.87E-134 | -0.30082182 | 0.861 | 0.893 | 4.71E-130 | HomC | POLR2L   |
| NRN1     | 5.56E-134 | 0.29485773  | 0.902 | 0.848 | 1.40E-129 | HomC | NRN1     |
| SERPINA1 | 8.83E-133 | 0.263873613 | 0.984 | 0.96  | 2.23E-128 | HomC | SERPINA1 |
| KLF4     | 1.23E-132 | 0.391431604 | 0.886 | 0.828 | 3.09E-128 | HomC | KLF4     |
| SERTAD1  | 1.59E-132 | 0.302211036 | 0.888 | 0.8   | 4.01E-128 | HomC | SERTAD1  |
| CD109    | 2.07E-132 | -0.28373705 | 0.358 | 0.497 | 5.21E-128 | HomC | CD109    |
| TXN      | 4.72E-129 | -0.30955923 | 0.862 | 0.89  | 1.19E-124 | HomC | TXN      |
| TIPARP   | 1.08E-127 | 0.313949658 | 0.672 | 0.538 | 2.73E-123 | HomC | TIPARP   |
| HLA-B    | 6.76E-127 | 0.256398091 | 0.991 | 0.973 | 1.70E-122 | HomC | HLA-B    |
| MT-ND4   | 8.70E-127 | -0.31033653 | 0.95  | 0.955 | 2.19E-122 | HomC | MT-ND4   |
| IFRD1    | 3.32E-126 | 0.256718784 | 0.73  | 0.607 | 8.35E-122 | HomC | IFRD1    |
| HSPB6    | 9.27E-126 | 0.270483363 | 0.523 | 0.386 | 2.34E-121 | HomC | HSPB6    |
| ICAM1    | 1.17E-125 | 0.654770438 | 0.603 | 0.478 | 2.95E-121 | HomC | ICAM1    |
| PNRC1    | 1.63E-125 | 0.301510354 | 0.84  | 0.75  | 4.11E-121 | HomC | PNRC1    |
| MT-ND3   | 4.27E-125 | -0.34658693 | 0.928 | 0.939 | 1.08E-120 | HomC | MT-ND3   |
| LECT1    | 7.53E-125 | 0.338392777 | 0.591 | 0.43  | 1.90E-120 | HomC | LECT1    |
| GADD45B  | 1.24E-124 | 0.504032024 | 0.95  | 0.908 | 3.13E-120 | HomC | GADD45B  |
| MT-ND2   | 3.53E-124 | -0.28495796 | 0.946 | 0.952 | 8.90E-120 | HomC | MT-ND2   |
| CHAC1    | 1.75E-121 | 0.276291477 | 0.264 | 0.148 | 4.40E-117 | HomC | CHAC1    |
| AK1      | 2.38E-121 | -0.36585603 | 0.859 | 0.866 | 6.00E-117 | HomC | AK1      |
| MSMO1    | 5.78E-121 | 0.388150593 | 0.473 | 0.343 | 1.46E-116 | HomC | MSMO1    |
| LMO4     | 3.76E-119 | 0.287876914 | 0.711 | 0.605 | 9.48E-115 | HomC | LMO4     |
| EMP3     | 8.18E-119 | -0.40193103 | 0.926 | 0.926 | 2.06E-114 | HomC | EMP3     |
| FXYD5    | 1.26E-118 | -0.27593078 | 0.946 | 0.944 | 3.17E-114 | HomC | FXYD5    |
| SSR3     | 3.89E-118 | 0.252089283 | 0.979 | 0.953 | 9.80E-114 | HomC | SSR3     |
| COMP     | 5.08E-118 | -0.38919477 | 0.999 | 1     | 1.28E-113 | HomC | COMP     |
| TAGLN    | 5.11E-118 | 1.23929346  | 0.301 | 0.178 | 1.29E-113 | HomC | TAGLN    |
| TIMP2    | 2.98E-116 | -0.42328985 | 0.684 | 0.748 | 7.51E-112 | HomC | TIMP2    |
| RHOB     | 7.45E-116 | 0.3318704   | 0.848 | 0.761 | 1.88E-111 | HomC | RHOB     |
| TMSB4X   | 3.25E-115 | -0.4547164  | 0.738 | 0.793 | 8.20E-111 | HomC | TMSB4X   |
| SDC4     | 1.98E-114 | 0.419241769 | 0.672 | 0.561 | 4.99E-110 | HomC | SDC4     |

|          |           |             |       |       |           |      |          |
|----------|-----------|-------------|-------|-------|-----------|------|----------|
| IGFBP5   | 2.54E-114 | -1.04190241 | 0.145 | 0.264 | 6.40E-110 | HomC | IGFBP5   |
| CNIH1    | 6.99E-114 | -0.27643469 | 0.635 | 0.705 | 1.76E-109 | HomC | CNIH1    |
| SLC39A14 | 1.54E-113 | -0.35573959 | 0.707 | 0.766 | 3.88E-109 | HomC | SLC39A14 |
| AEBP1    | 9.66E-113 | -0.41697834 | 0.815 | 0.86  | 2.43E-108 | HomC | AEBP1    |
| TRPS1    | 2.86E-112 | -0.27826442 | 0.479 | 0.595 | 7.20E-108 | HomC | TRPS1    |
| PRSS23   | 7.68E-112 | -0.48364073 | 0.19  | 0.318 | 1.94E-107 | HomC | PRSS23   |
| SPP1     | 1.28E-110 | -2.66988658 | 0.295 | 0.412 | 3.24E-106 | HomC | SPP1     |
| ID3      | 9.50E-109 | 0.390305747 | 0.79  | 0.689 | 2.39E-104 | HomC | ID3      |
| GALNT15  | 1.36E-107 | -0.31540468 | 0.421 | 0.541 | 3.42E-103 | HomC | GALNT15  |
| TCF4     | 1.53E-107 | -0.31133212 | 0.525 | 0.628 | 3.85E-103 | HomC | TCF4     |
| ELMSAN1  | 2.03E-106 | 0.259005481 | 0.385 | 0.264 | 5.11E-102 | HomC | ELMSAN1  |
| EDIL3    | 1.12E-105 | 0.29895996  | 0.811 | 0.748 | 2.82E-101 | HomC | EDIL3    |
| KLF2     | 5.70E-105 | 0.274412006 | 0.583 | 0.459 | 1.44E-100 | HomC | KLF2     |
| KLF6     | 2.16E-104 | 0.478646093 | 0.821 | 0.75  | 5.44E-100 | HomC | KLF6     |
| ID1      | 1.43E-103 | 0.342303813 | 0.765 | 0.666 | 3.60E-99  | HomC | ID1      |
| LTBP1    | 2.97E-103 | -0.29155762 | 0.306 | 0.43  | 7.49E-99  | HomC | LTBP1    |
| PART1    | 5.32E-103 | -0.41378623 | 0.36  | 0.474 | 1.34E-98  | HomC | PART1    |
| HES1     | 4.41E-102 | 0.40873884  | 0.588 | 0.464 | 1.11E-97  | HomC | HES1     |
| LMAN1    | 2.42E-100 | -0.25277204 | 0.544 | 0.632 | 6.09E-96  | HomC | LMAN1    |
| TIMP4    | 3.17E-100 | 0.270497937 | 0.719 | 0.621 | 7.99E-96  | HomC | TIMP4    |
| MYADM    | 1.67E-99  | 0.312290425 | 0.9   | 0.856 | 4.21E-95  | HomC | MYADM    |
| DST      | 1.96E-98  | -0.2565677  | 0.781 | 0.827 | 4.93E-94  | HomC | DST      |
| SRPX2    | 1.35E-97  | -0.30090229 | 0.501 | 0.606 | 3.41E-93  | HomC | SRPX2    |
| CRIP1    | 4.39E-97  | -0.35697271 | 0.281 | 0.403 | 1.11E-92  | HomC | CRIP1    |
| IFITM2   | 1.87E-96  | -0.38316101 | 0.789 | 0.851 | 4.72E-92  | HomC | IFITM2   |
| FSTL1    | 3.55E-94  | -0.42018352 | 0.629 | 0.682 | 8.95E-90  | HomC | FSTL1    |
| NEU1     | 1.05E-93  | 0.292566286 | 0.547 | 0.442 | 2.64E-89  | HomC | NEU1     |
| HERPUD1  | 5.13E-93  | 0.261476936 | 0.951 | 0.917 | 1.29E-88  | HomC | HERPUD1  |
| OSTC     | 1.31E-92  | -0.2832726  | 0.843 | 0.845 | 3.30E-88  | HomC | OSTC     |
| SLC7A2   | 1.77E-92  | -0.35020287 | 0.295 | 0.407 | 4.46E-88  | HomC | SLC7A2   |
| EFEMP1   | 1.15E-89  | -0.45257106 | 0.53  | 0.59  | 2.89E-85  | HomC | EFEMP1   |
| PROCR    | 7.75E-89  | -0.30944836 | 0.453 | 0.554 | 1.95E-84  | HomC | PROCR    |
| TPPP3    | 2.64E-88  | -0.61421257 | 0.192 | 0.303 | 6.66E-84  | HomC | TPPP3    |
| FAM43A   | 3.30E-85  | 0.26654111  | 0.326 | 0.218 | 8.31E-81  | HomC | FAM43A   |
| UGP2     | 1.15E-84  | -0.28488    | 0.859 | 0.881 | 2.90E-80  | HomC | UGP2     |
| CAPZB    | 9.97E-82  | -0.2888863  | 0.592 | 0.662 | 2.51E-77  | HomC | CAPZB    |
| COL1A1   | 1.02E-81  | -1.1742167  | 0.076 | 0.162 | 2.57E-77  | HomC | COL1A1   |
| SOCS3    | 3.13E-81  | 0.336947883 | 0.852 | 0.79  | 7.89E-77  | HomC | SOCS3    |
| SERTAD4  | 1.37E-80  | 0.277429327 | 0.517 | 0.419 | 3.46E-76  | HomC | SERTAD4  |
| PFKP     | 4.64E-79  | -0.27405419 | 0.651 | 0.71  | 1.17E-74  | HomC | PFKP     |
| HBEGF    | 5.06E-78  | 0.28357847  | 0.355 | 0.251 | 1.27E-73  | HomC | HBEGF    |
| COL10A1  | 9.26E-77  | -1.56597779 | 0.098 | 0.182 | 2.33E-72  | HomC | COL10A1  |
| GLRX     | 5.66E-74  | -0.38210682 | 0.405 | 0.515 | 1.43E-69  | HomC | GLRX     |
| NNMT     | 3.70E-73  | -0.31124256 | 0.956 | 0.964 | 9.33E-69  | HomC | NNMT     |
| PAPPA    | 2.71E-72  | -0.28002598 | 0.062 | 0.14  | 6.84E-68  | HomC | PAPPA    |
| HSPB1    | 3.18E-71  | 0.366996308 | 0.966 | 0.939 | 8.02E-67  | HomC | HSPB1    |
| SH3BGRL3 | 5.42E-71  | -0.36017861 | 0.976 | 0.964 | 1.37E-66  | HomC | SH3BGRL3 |
| MGST3    | 1.13E-68  | -0.26598367 | 0.795 | 0.821 | 2.84E-64  | HomC | MGST3    |
| IBSP     | 2.55E-67  | -2.42915302 | 0.104 | 0.182 | 6.43E-63  | HomC | IBSP     |
| AQP1     | 3.55E-67  | -0.41017213 | 0.056 | 0.128 | 8.95E-63  | HomC | AQP1     |
| VCAN     | 4.61E-67  | -0.35999993 | 0.201 | 0.302 | 1.16E-62  | HomC | VCAN     |
| ANXA4    | 1.91E-66  | -0.2534379  | 0.505 | 0.591 | 4.81E-62  | HomC | ANXA4    |
| MT-CO1   | 3.97E-66  | -0.26479651 | 0.945 | 0.949 | 1.00E-61  | HomC | MT-CO1   |
| MFGE8    | 1.32E-64  | -0.37969781 | 0.94  | 0.946 | 3.33E-60  | HomC | MFGE8    |
| NOVA1    | 5.62E-63  | -0.27225886 | 0.336 | 0.431 | 1.42E-58  | HomC | NOVA1    |
| DLX5     | 1.60E-62  | 0.253182892 | 0.558 | 0.462 | 4.03E-58  | HomC | DLX5     |
| 7SK.2    | 2.99E-62  | -0.3191282  | 0.093 | 0.171 | 7.52E-58  | HomC | 7SK.2    |
| PRG4     | 1.48E-61  | -2.78307781 | 0.333 | 0.409 | 3.72E-57  | HomC | PRG4     |
| CST3     | 2.36E-61  | 0.399645762 | 0.998 | 0.996 | 5.93E-57  | HomC | CST3     |
| DKK3     | 2.89E-60  | -0.32446089 | 0.364 | 0.455 | 7.28E-56  | HomC | DKK3     |

|            |          |             |       |       |          |      |           |
|------------|----------|-------------|-------|-------|----------|------|-----------|
| EMP1       | 9.80E-58 | 0.472497781 | 0.775 | 0.741 | 2.47E-53 | HomC | EMP1      |
| ANGPTL4    | 1.16E-57 | -0.26208948 | 0.557 | 0.653 | 2.93E-53 | HomC | ANGPTL4   |
| AMTN       | 2.10E-56 | -0.43184744 | 0.062 | 0.128 | 5.30E-52 | HomC | AMTN      |
| SAT1       | 3.18E-56 | 0.288052228 | 0.972 | 0.952 | 8.01E-52 | HomC | SAT1      |
| PCSK1N     | 1.81E-55 | -0.32318635 | 0.185 | 0.274 | 4.55E-51 | HomC | PCSK1N    |
| COL12A1    | 8.74E-55 | -0.27735864 | 0.309 | 0.402 | 2.20E-50 | HomC | COL12A1   |
| PPAP2B     | 3.34E-53 | -0.26668511 | 0.174 | 0.257 | 8.42E-49 | HomC | PPAP2B    |
| TNFRSF11B  | 5.12E-53 | -0.79380806 | 0.797 | 0.797 | 1.29E-48 | HomC | TNFRSF11B |
| SLPI       | 3.22E-52 | 0.491521627 | 0.283 | 0.201 | 8.12E-48 | HomC | SLPI      |
| RGS16      | 8.82E-49 | 0.394751418 | 0.78  | 0.725 | 2.22E-44 | HomC | RGS16     |
| IGFBP6     | 1.64E-41 | -0.35464508 | 0.679 | 0.712 | 4.12E-37 | HomC | IGFBP6    |
| COL5A2     | 4.60E-37 | -0.30009047 | 0.634 | 0.669 | 1.16E-32 | HomC | COL5A2    |
| IER3       | 1.62E-34 | 0.348736943 | 0.886 | 0.863 | 4.07E-30 | HomC | IER3      |
| RND1       | 6.63E-30 | 0.282034062 | 0.248 | 0.19  | 1.67E-25 | HomC | RND1      |
| TPM1       | 3.66E-28 | 0.32863014  | 0.371 | 0.315 | 9.22E-24 | HomC | TPM1      |
| TPM2       | 7.81E-28 | 0.292861875 | 0.857 | 0.818 | 1.97E-23 | HomC | TPM2      |
| TIMP3      | 2.19E-27 | -0.61516176 | 0.55  | 0.564 | 5.53E-23 | HomC | TIMP3     |
| C1R        | 4.12E-27 | -0.35952411 | 0.658 | 0.681 | 1.04E-22 | HomC | C1R       |
| CCL2       | 4.90E-24 | 0.402559652 | 0.252 | 0.2   | 1.23E-19 | HomC | CCL2      |
| G0S2       | 5.69E-24 | 0.310306722 | 0.233 | 0.179 | 1.43E-19 | HomC | G0S2      |
| LGALS1     | 2.24E-23 | -0.35764459 | 0.942 | 0.921 | 5.65E-19 | HomC | LGALS1    |
| STEAP4     | 8.54E-22 | -0.27674211 | 0.076 | 0.113 | 2.15E-17 | HomC | STEAP4    |
| TUBA1A     | 9.39E-16 | 0.290542032 | 0.628 | 0.614 | 2.37E-11 | HomC | TUBA1A    |
| NFKBIA     | 3.54E-14 | 0.433129202 | 0.894 | 0.877 | 8.92E-10 | HomC | NFKBIA    |
| PCOLCE     | 2.43E-09 | -0.27749481 | 0.847 | 0.823 | 6.12E-05 | HomC | PCOLCE    |
| CHI3L1     | 0.000759 | -0.84950315 | 0.806 | 0.78  | 1        | HomC | CHI3L1    |
| IBSP.1     | 0        | 4.414224618 | 0.568 | 0.093 | 0        | HTC  | IBSP      |
| COL10A1.1  | 0        | 3.540660144 | 0.669 | 0.075 | 0        | HTC  | COL10A1   |
| SPP1.1     | 0        | 3.356003306 | 0.676 | 0.329 | 0        | HTC  | SPP1      |
| FGFBP2     | 0        | 2.012433735 | 1     | 0.954 | 0        | HTC  | FGFBP2    |
| C2orf40    | 0        | 1.665277369 | 1     | 0.999 | 0        | HTC  | C2orf40   |
| TF.1       | 0        | 1.633676516 | 0.848 | 0.482 | 0        | HTC  | TF        |
| PDPN       | 0        | 1.568383817 | 0.986 | 0.734 | 0        | HTC  | PDPN      |
| C2orf82.1  | 0        | 1.558913081 | 1     | 0.939 | 0        | HTC  | C2orf82   |
| APOD       | 0        | 1.55781555  | 0.956 | 0.729 | 0        | HTC  | APOD      |
| CYTL1.1    | 0        | 1.480732307 | 0.98  | 0.882 | 0        | HTC  | CYTL1     |
| TSPAN13    | 0        | 1.447480954 | 0.79  | 0.275 | 0        | HTC  | TSPAN13   |
| CHAD.1     | 0        | 1.423975141 | 0.999 | 0.847 | 0        | HTC  | CHAD      |
| IER2.1     | 0        | 1.387107787 | 0.984 | 0.852 | 0        | HTC  | IER2      |
| RBP4.1     | 0        | 1.351079681 | 0.895 | 0.676 | 0        | HTC  | RBP4      |
| LECT1.1    | 0        | 1.278673384 | 0.825 | 0.424 | 0        | HTC  | LECT1     |
| CRYAB      | 0        | 1.23651566  | 0.959 | 0.802 | 0        | HTC  | CRYAB     |
| MFGE8.1    | 0        | 1.234625263 | 0.994 | 0.937 | 0        | HTC  | MFGE8     |
| MIA        | 0        | 1.195170247 | 1     | 0.954 | 0        | HTC  | MIA       |
| PLAC9      | 0        | 1.159389108 | 0.994 | 0.968 | 0        | HTC  | PLAC9     |
| AGR2       | 0        | 1.136501125 | 0.27  | 0.024 | 0        | HTC  | AGR2      |
| SERPINA1.1 | 0        | 1.118401205 | 1     | 0.962 | 0        | HTC  | SERPINA1  |
| S100A1     | 0        | 1.089986411 | 1     | 0.879 | 0        | HTC  | S100A1    |
| SERPINI1   | 0        | 1.065030283 | 0.725 | 0.322 | 0        | HTC  | SERPINI1  |
| SPINT2.1   | 0        | 1.061776253 | 0.997 | 0.889 | 0        | HTC  | SPINT2    |
| STC2.1     | 0        | 1.010479521 | 0.713 | 0.393 | 0        | HTC  | STC2      |
| FGFR1      | 0        | 1.003278566 | 0.908 | 0.683 | 0        | HTC  | FGFR1     |
| SLC29A1    | 0        | 0.998046356 | 0.971 | 0.772 | 0        | HTC  | SLC29A1   |
| RAMP1      | 0        | 0.989782289 | 0.653 | 0.204 | 0        | HTC  | RAMP1     |
| MRPS6      | 0        | 0.979353359 | 0.922 | 0.653 | 0        | HTC  | MRPS6     |
| CPE        | 0        | 0.961194403 | 0.696 | 0.312 | 0        | HTC  | CPE       |
| JUNB.1     | 0        | 0.959128948 | 0.999 | 0.993 | 0        | HTC  | JUNB      |
| PHOSPHO1   | 0        | 0.951247834 | 0.636 | 0.148 | 0        | HTC  | PHOSPHO1  |
| FXYD1.1    | 0        | 0.912718759 | 0.933 | 0.716 | 0        | HTC  | FXYD1     |
| MEF2C      | 0        | 0.904156685 | 0.751 | 0.393 | 0        | HTC  | MEF2C     |

|               |   |             |       |       |   |     |               |
|---------------|---|-------------|-------|-------|---|-----|---------------|
| S100B.1       | 0 | 0.894336338 | 0.999 | 0.92  | 0 | HTC | S100B         |
| SCRG1.1       | 0 | 0.881561473 | 1     | 0.993 | 0 | HTC | SCRG1         |
| EGR1.1        | 0 | 0.869470499 | 0.987 | 0.904 | 0 | HTC | EGR1          |
| DKK1.1        | 0 | 0.798452482 | 0.471 | 0.139 | 0 | HTC | DKK1          |
| IGFBP6.1      | 0 | 0.789836678 | 0.895 | 0.671 | 0 | HTC | IGFBP6        |
| FXVD6         | 0 | 0.787975478 | 0.975 | 0.858 | 0 | HTC | FXVD6         |
| MFI2          | 0 | 0.781240575 | 0.851 | 0.527 | 0 | HTC | MFI2          |
| BHLHE41       | 0 | 0.765965045 | 0.86  | 0.562 | 0 | HTC | BHLHE41       |
| MDFI.1        | 0 | 0.764927484 | 0.929 | 0.671 | 0 | HTC | MDFI          |
| SSR4          | 0 | 0.755490179 | 0.996 | 0.965 | 0 | HTC | SSR4          |
| EGR3          | 0 | 0.743810527 | 0.519 | 0.215 | 0 | HTC | EGR3          |
| ACAN.1        | 0 | 0.73661093  | 1     | 0.963 | 0 | HTC | ACAN          |
| DUSP1.1       | 0 | 0.721137732 | 0.922 | 0.753 | 0 | HTC | DUSP1         |
| TSPO          | 0 | 0.715286993 | 0.997 | 0.944 | 0 | HTC | TSPO          |
| CYSTM1        | 0 | 0.704827761 | 0.877 | 0.617 | 0 | HTC | CYSTM1        |
| NUCB2         | 0 | 0.69243916  | 0.986 | 0.893 | 0 | HTC | NUCB2         |
| IVNS1ABP      | 0 | 0.677264311 | 0.913 | 0.721 | 0 | HTC | IVNS1ABP      |
| SLC14A1.1     | 0 | 0.671145447 | 0.718 | 0.372 | 0 | HTC | SLC14A1       |
| ITM2C.1       | 0 | 0.663211625 | 0.995 | 0.933 | 0 | HTC | ITM2C         |
| AC005152.3    | 0 | 0.655125399 | 0.514 | 0.192 | 0 | HTC | AC005152.3    |
| FOS.1         | 0 | 0.651721879 | 0.998 | 0.977 | 0 | HTC | FOS           |
| FOXA3.1       | 0 | 0.627705116 | 0.711 | 0.383 | 0 | HTC | FOXA3         |
| CD59          | 0 | 0.61527741  | 0.99  | 0.936 | 0 | HTC | CD59          |
| TTLL7.1       | 0 | 0.606235706 | 0.679 | 0.338 | 0 | HTC | TTLL7         |
| TMEM59        | 0 | 0.604347835 | 0.998 | 0.982 | 0 | HTC | TMEM59        |
| F13A1         | 0 | 0.581652549 | 0.372 | 0.069 | 0 | HTC | F13A1         |
| TSPAN6        | 0 | 0.572338082 | 0.896 | 0.696 | 0 | HTC | TSPAN6        |
| AP3S1         | 0 | 0.566188487 | 0.965 | 0.853 | 0 | HTC | AP3S1         |
| NDUFA1        | 0 | 0.520717131 | 0.982 | 0.935 | 0 | HTC | NDUFA1        |
| AQPEP         | 0 | 0.511380402 | 0.49  | 0.15  | 0 | HTC | AQPEP         |
| FXVD2         | 0 | 0.501175456 | 0.459 | 0.143 | 0 | HTC | FXVD2         |
| PEBP1         | 0 | 0.469021429 | 0.989 | 0.958 | 0 | HTC | PEBP1         |
| SERF2         | 0 | 0.451258712 | 1     | 0.998 | 0 | HTC | SERF2         |
| SCUBE1        | 0 | 0.427570316 | 0.412 | 0.123 | 0 | HTC | SCUBE1        |
| SERPINA6      | 0 | 0.427007372 | 0.299 | 0.064 | 0 | HTC | SERPINA6      |
| MYOC          | 0 | 0.41942467  | 0.23  | 0.046 | 0 | HTC | MYOC          |
| ZNF385B       | 0 | 0.406224053 | 0.488 | 0.203 | 0 | HTC | ZNF385B       |
| SPOCK3        | 0 | 0.38784657  | 0.209 | 0.028 | 0 | HTC | SPOCK3        |
| PLEKHB1       | 0 | 0.360689567 | 0.468 | 0.186 | 0 | HTC | PLEKHB1       |
| RP11-536O18.2 | 0 | 0.296216227 | 0.156 | 0.01  | 0 | HTC | RP11-536O18.2 |
| RPL41         | 0 | -0.27685017 | 1     | 1     | 0 | HTC | RPL41         |
| RPL15         | 0 | -0.34232635 | 1     | 1     | 0 | HTC | RPL15         |
| RPL10A        | 0 | -0.3811943  | 1     | 0.999 | 0 | HTC | RPL10A        |
| EEF1A1        | 0 | -0.38829333 | 1     | 1     | 0 | HTC | EEF1A1        |
| RPL3          | 0 | -0.39078759 | 0.999 | 1     | 0 | HTC | RPL3          |
| RPL27A        | 0 | -0.39143128 | 0.999 | 0.999 | 0 | HTC | RPL27A        |
| RPS19         | 0 | -0.39772128 | 1     | 1     | 0 | HTC | RPS19         |
| RPL18A        | 0 | -0.41138803 | 0.999 | 1     | 0 | HTC | RPL18A        |
| RPL7          | 0 | -0.4121094  | 0.999 | 1     | 0 | HTC | RPL7          |
| RPL39         | 0 | -0.43989418 | 0.998 | 0.999 | 0 | HTC | RPL39         |
| RPS24         | 0 | -0.4732019  | 0.999 | 0.999 | 0 | HTC | RPS24         |
| RPLP0         | 0 | -0.47380671 | 0.999 | 1     | 0 | HTC | RPLP0         |
| RPL10         | 0 | -0.4982506  | 1     | 1     | 0 | HTC | RPL10         |
| EIF3E         | 0 | -0.55358393 | 0.953 | 0.978 | 0 | HTC | EIF3E         |
| RPS2          | 0 | -0.60547598 | 0.999 | 1     | 0 | HTC | RPS2          |
| COL12A1.1     | 0 | -0.68892046 | 0.076 | 0.421 | 0 | HTC | COL12A1       |
| FSTL1.1       | 0 | -0.78118907 | 0.464 | 0.698 | 0 | HTC | FSTL1         |
| PART1.1       | 0 | -0.84152911 | 0.14  | 0.487 | 0 | HTC | PART1         |
| IFITM3.1      | 0 | -0.86284987 | 0.944 | 0.976 | 0 | HTC | IFITM3        |
| ARID5B        | 0 | -0.88341082 | 0.363 | 0.691 | 0 | HTC | ARID5B        |

|             |           |             |       |       |           |     |           |
|-------------|-----------|-------------|-------|-------|-----------|-----|-----------|
| C1R.1       | 0         | -0.91295812 | 0.382 | 0.72  | 0         | HTC | C1R       |
| COL6A2.1    | 0         | -1.04630201 | 0.841 | 0.895 | 0         | HTC | COL6A2    |
| AEBP1.1     | 0         | -1.1070272  | 0.665 | 0.875 | 0         | HTC | AEBP1     |
| EFEMP1.1    | 0         | -1.1725746  | 0.13  | 0.642 | 0         | HTC | EFEMP1    |
| COL6A1.1    | 0         | -1.22442385 | 0.722 | 0.858 | 0         | HTC | COL6A1    |
| INHBA       | 0         | -1.27801554 | 0.466 | 0.735 | 0         | HTC | INHBA     |
| NNMT.1      | 0         | -1.43560854 | 0.864 | 0.977 | 0         | HTC | NNMT      |
| PLA2G2A.1   | 0         | -1.62907597 | 0.962 | 0.994 | 0         | HTC | PLA2G2A   |
| TNC.1       | 0         | -1.89689588 | 0.131 | 0.567 | 0         | HTC | TNC       |
| CLU.1       | 0         | -1.96344111 | 1     | 1     | 0         | HTC | CLU       |
| OGN.1       | 0         | -2.08981523 | 0.51  | 0.862 | 0         | HTC | OGN       |
| CRTAC1.1    | 0         | -2.47953222 | 0.518 | 0.789 | 0         | HTC | CRTAC1    |
| ASPN.1      | 0         | -2.78641944 | 0.294 | 0.658 | 0         | HTC | ASPN      |
| CHI3L1.1    | 0         | -2.85209707 | 0.594 | 0.819 | 0         | HTC | CHI3L1    |
| COL3A1.1    | 0         | -3.27021716 | 0.622 | 0.806 | 0         | HTC | COL3A1    |
| CHI3L2.1    | 0         | -3.47527505 | 0.652 | 0.919 | 0         | HTC | CHI3L2    |
| TGFBI.1     | 1.07E-307 | -1.6725956  | 0.119 | 0.431 | 2.69E-303 | HTC | TGFBI     |
| NGFRAP1     | 3.84E-307 | 0.522406834 | 0.975 | 0.889 | 9.68E-303 | HTC | NGFRAP1   |
| CILP2       | 2.14E-306 | -1.21453434 | 0.623 | 0.788 | 5.38E-302 | HTC | CILP2     |
| FBXO2.1     | 1.05E-305 | 0.525759117 | 0.972 | 0.854 | 2.65E-301 | HTC | FBXO2     |
| RPL21       | 1.60E-304 | -0.32472215 | 0.999 | 1     | 4.04E-300 | HTC | RPL21     |
| PRDX4       | 4.93E-304 | 0.545761504 | 0.977 | 0.913 | 1.24E-299 | HTC | PRDX4     |
| ABI3BP.1    | 1.92E-302 | -1.19302286 | 0.226 | 0.526 | 4.82E-298 | HTC | ABI3BP    |
| FAP.1       | 3.69E-301 | -0.56715593 | 0.032 | 0.344 | 9.31E-297 | HTC | FAP       |
| FCGRT       | 4.76E-299 | 0.563799513 | 0.914 | 0.778 | 1.20E-294 | HTC | FCGRT     |
| CRISPLD1.1  | 2.85E-297 | 1.037467917 | 0.738 | 0.471 | 7.17E-293 | HTC | CRISPLD1  |
| CTHRC1      | 3.05E-296 | -1.16021064 | 0.306 | 0.591 | 7.69E-292 | HTC | CTHRC1    |
| STK38L.1    | 4.52E-295 | 0.61005174  | 0.869 | 0.65  | 1.14E-290 | HTC | STK38L    |
| SOD2        | 7.94E-294 | -1.34855518 | 0.776 | 0.87  | 2.00E-289 | HTC | SOD2      |
| NTAN1       | 1.88E-292 | 0.52820178  | 0.634 | 0.367 | 4.73E-288 | HTC | NTAN1     |
| NDRG2.1     | 2.86E-292 | 0.593848291 | 0.875 | 0.652 | 7.21E-288 | HTC | NDRG2     |
| RPS6        | 2.86E-291 | -0.30133721 | 1     | 1     | 7.20E-287 | HTC | RPS6      |
| SCIN.1      | 6.96E-290 | 0.501881619 | 0.749 | 0.474 | 1.75E-285 | HTC | SCIN      |
| TNFRSF11B.1 | 1.36E-289 | 0.836240267 | 0.957 | 0.771 | 3.43E-285 | HTC | TNFRSF11B |
| NUPR1L      | 3.60E-284 | 0.376121617 | 0.465 | 0.2   | 9.08E-280 | HTC | NUPR1L    |
| CALM1       | 1.62E-282 | 0.582720371 | 0.983 | 0.939 | 4.09E-278 | HTC | CALM1     |
| RPL14       | 2.61E-278 | -0.3386124  | 0.997 | 0.999 | 6.57E-274 | HTC | RPL14     |
| GLIPR1      | 9.11E-278 | 0.553735379 | 0.85  | 0.616 | 2.29E-273 | HTC | GLIPR1    |
| COL15A1.1   | 2.05E-277 | -0.71657948 | 0.104 | 0.406 | 5.16E-273 | HTC | COL15A1   |
| RPL28.1     | 4.55E-276 | -0.39787476 | 0.999 | 0.999 | 1.15E-271 | HTC | RPL28     |
| BGN         | 8.52E-275 | -0.49190245 | 0.999 | 0.999 | 2.15E-270 | HTC | BGN       |
| RPL6        | 1.62E-274 | -0.30201415 | 1     | 1     | 4.07E-270 | HTC | RPL6      |
| CLEC3A.1    | 2.30E-273 | 0.56731954  | 0.957 | 0.716 | 5.80E-269 | HTC | CLEC3A    |
| LBH         | 3.64E-270 | -0.65149374 | 0.219 | 0.53  | 9.17E-266 | HTC | LBH       |
| RPS5        | 3.50E-268 | -0.33759206 | 0.998 | 0.999 | 8.81E-264 | HTC | RPS5      |
| RCAN1       | 1.77E-267 | -1.06495633 | 0.468 | 0.714 | 4.46E-263 | HTC | RCAN1     |
| S100A13     | 3.75E-267 | 0.44242976  | 0.997 | 0.973 | 9.45E-263 | HTC | S100A13   |
| LTBP2.1     | 7.97E-266 | -0.60678914 | 0.123 | 0.421 | 2.01E-261 | HTC | LTBP2     |
| GAPDH       | 1.43E-265 | -0.44323525 | 1     | 1     | 3.61E-261 | HTC | GAPDH     |
| GNB2L1      | 4.65E-265 | -0.34059747 | 0.996 | 0.998 | 1.17E-260 | HTC | GNB2L1    |
| GALNT15.1   | 5.91E-265 | -0.66147522 | 0.255 | 0.545 | 1.49E-260 | HTC | GALNT15   |
| GSN         | 1.14E-263 | 0.428615063 | 0.981 | 0.928 | 2.87E-259 | HTC | GSN       |
| FIBIN       | 5.88E-263 | -0.92541806 | 0.755 | 0.857 | 1.48E-258 | HTC | FIBIN     |
| PCOLCE.1    | 2.61E-262 | -0.84190033 | 0.69  | 0.853 | 6.58E-258 | HTC | PCOLCE    |
| SLC44A2     | 2.87E-262 | 0.505614905 | 0.676 | 0.426 | 7.24E-258 | HTC | SLC44A2   |
| COL5A1.1    | 2.63E-261 | -0.87816351 | 0.31  | 0.566 | 6.61E-257 | HTC | COL5A1    |
| ACTG1.1     | 2.43E-257 | 0.552908566 | 1     | 0.994 | 6.12E-253 | HTC | ACTG1     |
| RASD1.1     | 1.61E-256 | 0.912839444 | 0.826 | 0.611 | 4.06E-252 | HTC | RASD1     |
| COL1A2.1    | 2.84E-256 | -2.35016525 | 0.318 | 0.553 | 7.15E-252 | HTC | COL1A2    |
| ID3.1       | 4.12E-254 | -0.84509122 | 0.488 | 0.756 | 1.04E-249 | HTC | ID3       |

|            |           |             |       |       |           |     |          |
|------------|-----------|-------------|-------|-------|-----------|-----|----------|
| EXTL1      | 1.44E-250 | 0.33446891  | 0.458 | 0.201 | 3.64E-246 | HTC | EXTL1    |
| RPL22      | 2.13E-250 | -0.32457558 | 0.997 | 0.998 | 5.37E-246 | HTC | RPL22    |
| RPL13      | 1.86E-245 | -0.30646965 | 1     | 1     | 4.68E-241 | HTC | RPL13    |
| LDLRAD4.1  | 8.76E-245 | 0.543205677 | 0.802 | 0.587 | 2.21E-240 | HTC | LDLRAD4  |
| RPS15A     | 8.19E-244 | -0.30913853 | 0.997 | 0.999 | 2.06E-239 | HTC | RPS15A   |
| GCHFR      | 2.88E-241 | 0.321811157 | 0.46  | 0.211 | 7.27E-237 | HTC | GCHFR    |
| RPL13A     | 3.12E-239 | -0.27752919 | 1     | 1     | 7.87E-235 | HTC | RPL13A   |
| PKM        | 4.37E-239 | 0.426401942 | 0.996 | 0.989 | 1.10E-234 | HTC | PKM      |
| THBS3.1    | 5.42E-239 | -0.4850544  | 0.1   | 0.381 | 1.37E-234 | HTC | THBS3    |
| RPS3       | 1.45E-238 | -0.30827959 | 1     | 1     | 3.64E-234 | HTC | RPS3     |
| PPP3CA     | 4.68E-236 | -0.56928968 | 0.638 | 0.802 | 1.18E-231 | HTC | PPP3CA   |
| DPT.1      | 6.00E-235 | -1.33941778 | 0.136 | 0.407 | 1.51E-230 | HTC | DPT      |
| CP         | 1.05E-234 | 0.351610216 | 0.833 | 0.568 | 2.65E-230 | HTC | CP       |
| VIM        | 1.51E-234 | -0.47686268 | 1     | 1     | 3.80E-230 | HTC | VIM      |
| ENO1       | 2.69E-233 | -0.46933648 | 0.991 | 0.997 | 6.77E-229 | HTC | ENO1     |
| WBSCR22    | 5.48E-233 | 0.439711258 | 0.788 | 0.596 | 1.38E-228 | HTC | WBSCR22  |
| RANBP3L    | 6.66E-232 | 0.25150983  | 0.256 | 0.079 | 1.68E-227 | HTC | RANBP3L  |
| FRZB.1     | 1.10E-230 | 0.814515698 | 0.949 | 0.798 | 2.77E-226 | HTC | FRZB     |
| CCDC88A    | 1.45E-228 | 0.528844369 | 0.65  | 0.419 | 3.66E-224 | HTC | CCDC88A  |
| RPS23      | 4.05E-227 | -0.30217827 | 0.999 | 1     | 1.02E-222 | HTC | RPS23    |
| DAP        | 1.22E-226 | 0.421316878 | 0.861 | 0.677 | 3.07E-222 | HTC | DAP      |
| MAFB       | 4.68E-226 | -0.64510421 | 0.065 | 0.33  | 1.18E-221 | HTC | MAFB     |
| RPS27      | 1.10E-225 | -0.26886934 | 1     | 1     | 2.77E-221 | HTC | RPS27    |
| ITM2B.1    | 5.46E-224 | 0.333376379 | 1     | 0.999 | 1.37E-219 | HTC | ITM2B    |
| ACTB.1     | 1.40E-221 | 0.413055279 | 0.999 | 0.997 | 3.53E-217 | HTC | ACTB     |
| EIF1       | 8.77E-221 | -0.3245591  | 1     | 1     | 2.21E-216 | HTC | EIF1     |
| EEF2       | 8.71E-220 | -0.37887984 | 0.989 | 0.995 | 2.20E-215 | HTC | EEF2     |
| COL5A2.1   | 1.06E-219 | -0.81580059 | 0.508 | 0.682 | 2.68E-215 | HTC | COL5A2   |
| EGR2       | 2.28E-218 | 0.519453702 | 0.496 | 0.262 | 5.74E-214 | HTC | EGR2     |
| GLDN       | 4.95E-217 | 0.366064442 | 0.515 | 0.272 | 1.25E-212 | HTC | GLDN     |
| SOD3       | 6.46E-217 | 0.668269582 | 0.981 | 0.92  | 1.63E-212 | HTC | SOD3     |
| FTL        | 8.66E-217 | 0.271121271 | 1     | 1     | 2.18E-212 | HTC | FTL      |
| CD63.1     | 1.45E-216 | 0.371688194 | 1     | 0.998 | 3.65E-212 | HTC | CD63     |
| DAB2       | 1.33E-215 | -0.54348524 | 0.375 | 0.618 | 3.35E-211 | HTC | DAB2     |
| RPL32      | 8.69E-215 | -0.26869646 | 0.998 | 1     | 2.19E-210 | HTC | RPL32    |
| THY1.1     | 1.10E-212 | -0.70570963 | 0.024 | 0.263 | 2.76E-208 | HTC | THY1     |
| CD99       | 6.71E-212 | 0.451000553 | 0.991 | 0.971 | 1.69E-207 | HTC | CD99     |
| LRPAP1     | 6.20E-211 | 0.476794091 | 0.903 | 0.8   | 1.56E-206 | HTC | LRPAP1   |
| AK1.1      | 1.17E-210 | 0.418214089 | 0.971 | 0.847 | 2.94E-206 | HTC | AK1      |
| GALNT18    | 2.29E-208 | -0.45016502 | 0.358 | 0.603 | 5.76E-204 | HTC | GALNT18  |
| RPL29      | 3.03E-208 | -0.30623614 | 0.997 | 0.998 | 7.64E-204 | HTC | RPL29    |
| FAM134B.1  | 4.90E-205 | -0.53355324 | 0.241 | 0.491 | 1.24E-200 | HTC | FAM134B  |
| HLA-A      | 1.45E-204 | 0.42172164  | 0.996 | 0.99  | 3.65E-200 | HTC | HLA-A    |
| BANK1      | 1.09E-203 | 0.343833623 | 0.372 | 0.169 | 2.74E-199 | HTC | BANK1    |
| MST4.1     | 3.46E-203 | 0.400978277 | 0.785 | 0.547 | 8.73E-199 | HTC | MST4     |
| RPS29      | 7.16E-203 | -0.28491831 | 0.997 | 0.999 | 1.80E-198 | HTC | RPS29    |
| RPS18      | 6.01E-200 | -0.25440505 | 1     | 1     | 1.51E-195 | HTC | RPS18    |
| GPX3.1     | 6.13E-200 | 0.30561212  | 1     | 0.988 | 1.54E-195 | HTC | GPX3     |
| A2M        | 6.92E-200 | 0.496750186 | 0.622 | 0.376 | 1.74E-195 | HTC | A2M      |
| FTH1       | 2.18E-198 | -0.40303375 | 1     | 1     | 5.50E-194 | HTC | FTH1     |
| RPL12      | 4.14E-198 | -0.31687542 | 0.999 | 0.999 | 1.04E-193 | HTC | RPL12    |
| TNFSF11    | 1.14E-197 | 0.383453842 | 0.235 | 0.078 | 2.88E-193 | HTC | TNFSF11  |
| ADRB2      | 2.20E-196 | 0.511709238 | 0.607 | 0.378 | 5.54E-192 | HTC | ADRB2    |
| TMED10     | 4.83E-196 | 0.392636998 | 0.969 | 0.907 | 1.22E-191 | HTC | TMED10   |
| SERPINA5.1 | 7.12E-196 | 0.572392748 | 0.939 | 0.83  | 1.79E-191 | HTC | SERPINA5 |
| SMOC1.1    | 2.90E-195 | -0.72690073 | 0.292 | 0.511 | 7.31E-191 | HTC | SMOC1    |
| GAS1.1     | 5.23E-194 | -0.71057847 | 0.207 | 0.46  | 1.32E-189 | HTC | GAS1     |
| VKORC1     | 1.13E-193 | 0.347917669 | 0.995 | 0.959 | 2.86E-189 | HTC | VKORC1   |
| NEBL       | 1.78E-192 | 0.395577789 | 0.7   | 0.484 | 4.48E-188 | HTC | NEBL     |
| PDE4DIP    | 8.49E-191 | 0.41490845  | 0.838 | 0.661 | 2.14E-186 | HTC | PDE4DIP  |

|               |           |             |       |       |           |     |             |
|---------------|-----------|-------------|-------|-------|-----------|-----|-------------|
| CTGF          | 9.94E-189 | -0.68340173 | 0.973 | 0.983 | 2.50E-184 | HTC | CTGF        |
| PABPC1        | 6.93E-188 | -0.3969305  | 0.874 | 0.924 | 1.74E-183 | HTC | PABPC1      |
| MXRA5.1       | 7.22E-186 | -0.4515296  | 0.041 | 0.266 | 1.82E-181 | HTC | MXRA5       |
| NFKBIZ        | 7.28E-186 | -0.69928933 | 0.317 | 0.55  | 1.84E-181 | HTC | NFKBIZ      |
| KCNK5         | 1.04E-184 | 0.256381372 | 0.364 | 0.158 | 2.62E-180 | HTC | KCNK5       |
| SGK1          | 1.33E-184 | 0.6002938   | 0.667 | 0.455 | 3.36E-180 | HTC | SGK1        |
| H1FO          | 1.24E-182 | 0.587584161 | 0.671 | 0.463 | 3.14E-178 | HTC | H1FO        |
| NFKBIA.1      | 4.09E-182 | -1.0299382  | 0.817 | 0.893 | 1.03E-177 | HTC | NFKBIA      |
| TBCB          | 6.63E-182 | 0.440552403 | 0.833 | 0.692 | 1.67E-177 | HTC | TBCB        |
| CHID1         | 1.05E-181 | 0.399028629 | 0.828 | 0.674 | 2.65E-177 | HTC | CHID1       |
| GLT8D2        | 1.67E-180 | -0.39045595 | 0.321 | 0.562 | 4.20E-176 | HTC | GLT8D2      |
| CD320         | 7.99E-180 | 0.373124377 | 0.724 | 0.522 | 2.01E-175 | HTC | CD320       |
| CHRDL2.1      | 6.92E-179 | 0.766067686 | 0.455 | 0.232 | 1.74E-174 | HTC | CHRDL2      |
| CST3.1        | 8.17E-179 | 0.270772492 | 1     | 0.996 | 2.06E-174 | HTC | CST3        |
| BTG2.1        | 5.13E-177 | 0.620909582 | 0.849 | 0.709 | 1.29E-172 | HTC | BTG2        |
| CRIP1.1       | 2.47E-176 | -0.5905109  | 0.164 | 0.398 | 6.23E-172 | HTC | CRIP1       |
| HCFC1R1       | 9.11E-176 | -0.51572688 | 0.481 | 0.659 | 2.30E-171 | HTC | HCFC1R1     |
| EFHD1         | 1.31E-175 | 0.289418414 | 0.42  | 0.212 | 3.30E-171 | HTC | EFHD1       |
| RPL4          | 1.66E-175 | -0.29561813 | 0.997 | 0.999 | 4.19E-171 | HTC | RPL4        |
| C10orf54      | 2.36E-175 | -0.42855925 | 0.296 | 0.529 | 5.94E-171 | HTC | C10orf54    |
| HEXB          | 3.39E-175 | 0.444159004 | 0.815 | 0.681 | 8.54E-171 | HTC | HEXB        |
| IFITM2.1      | 7.04E-175 | -0.70310556 | 0.74  | 0.847 | 1.77E-170 | HTC | IFITM2      |
| GALE          | 7.57E-175 | 0.350682617 | 0.665 | 0.453 | 1.91E-170 | HTC | GALE        |
| RHOC          | 2.41E-172 | 0.358541683 | 0.951 | 0.864 | 6.07E-168 | HTC | RHOC        |
| COMP.1        | 2.71E-171 | -0.76617657 | 0.999 | 1     | 6.82E-167 | HTC | COMP        |
| CTA-29F11.1.1 | 4.47E-171 | 0.389117092 | 0.593 | 0.363 | 1.13E-166 | HTC | CTA-29F11.1 |
| PLD3          | 1.45E-170 | 0.386883733 | 0.953 | 0.884 | 3.66E-166 | HTC | PLD3        |
| RPS12         | 6.45E-170 | -0.30717781 | 1     | 1     | 1.62E-165 | HTC | RPS12       |
| TNXB.1        | 1.25E-169 | -0.63703639 | 0.123 | 0.352 | 3.15E-165 | HTC | TNXB        |
| FKBP2         | 2.21E-169 | 0.440159859 | 0.927 | 0.825 | 5.56E-165 | HTC | FKBP2       |
| CNPY2         | 2.01E-168 | 0.383134218 | 0.922 | 0.813 | 5.07E-164 | HTC | CNPY2       |
| ATRAID        | 3.22E-168 | 0.388664476 | 0.951 | 0.898 | 8.12E-164 | HTC | ATRAID      |
| BHLHE40.1     | 2.67E-166 | 0.485587712 | 0.893 | 0.782 | 6.73E-162 | HTC | BHLHE40     |
| PRDX5         | 1.08E-165 | 0.331127433 | 0.948 | 0.862 | 2.71E-161 | HTC | PRDX5       |
| MAP2K6        | 1.81E-165 | 0.436782217 | 0.557 | 0.353 | 4.56E-161 | HTC | MAP2K6      |
| C10orf105     | 1.04E-164 | -0.28310449 | 0.027 | 0.227 | 2.62E-160 | HTC | C10orf105   |
| PIM1          | 6.52E-164 | 0.510197241 | 0.501 | 0.296 | 1.64E-159 | HTC | PIM1        |
| INSIG1.1      | 7.32E-164 | 0.554150384 | 0.674 | 0.472 | 1.84E-159 | HTC | INSIG1      |
| RPS28         | 8.58E-164 | -0.25035094 | 0.999 | 0.999 | 2.16E-159 | HTC | RPS28       |
| PMP22.1       | 1.64E-163 | -0.50942334 | 0.859 | 0.903 | 4.14E-159 | HTC | PMP22       |
| SCARA3        | 1.94E-163 | -0.49237315 | 0.409 | 0.614 | 4.88E-159 | HTC | SCARA3      |
| ERP29         | 2.48E-163 | 0.358330737 | 0.895 | 0.793 | 6.25E-159 | HTC | ERP29       |
| FURIN         | 7.32E-163 | 0.332999779 | 0.508 | 0.304 | 1.84E-158 | HTC | FURIN       |
| RHOB.1        | 7.32E-163 | 0.535721037 | 0.9   | 0.769 | 1.85E-158 | HTC | RHOB        |
| GBP2          | 1.28E-162 | -0.4950973  | 0.274 | 0.504 | 3.22E-158 | HTC | GBP2        |
| NR4A1.1       | 1.32E-162 | 0.535948568 | 0.762 | 0.566 | 3.32E-158 | HTC | NR4A1       |
| DIO2.1        | 1.57E-162 | -0.50369607 | 0.056 | 0.264 | 3.96E-158 | HTC | DIO2        |
| PRPSAP1       | 9.17E-162 | 0.316983872 | 0.611 | 0.394 | 2.31E-157 | HTC | PRPSAP1     |
| CST6          | 1.07E-161 | 0.487703757 | 0.332 | 0.156 | 2.71E-157 | HTC | CST6        |
| MIR497HG      | 3.64E-161 | 0.334725538 | 0.621 | 0.4   | 9.17E-157 | HTC | MIR497HG    |
| RHOD          | 7.75E-161 | 0.324027121 | 0.575 | 0.37  | 1.95E-156 | HTC | RHOD        |
| NAP1L1        | 1.81E-159 | -0.33639026 | 0.969 | 0.976 | 4.57E-155 | HTC | NAP1L1      |
| SKP1          | 1.45E-157 | 0.261781065 | 0.996 | 0.988 | 3.66E-153 | HTC | SKP1        |
| SBSPON        | 4.82E-157 | -0.55049347 | 0.278 | 0.494 | 1.21E-152 | HTC | SBSPON      |
| FXYD5.1       | 5.34E-157 | 0.370281331 | 0.98  | 0.939 | 1.34E-152 | HTC | FXYD5       |
| RCN3          | 2.39E-156 | 0.407122779 | 0.942 | 0.86  | 6.03E-152 | HTC | RCN3        |
| TMEM147       | 2.89E-156 | 0.355583687 | 0.862 | 0.736 | 7.27E-152 | HTC | TMEM147     |
| PPAP2B.1      | 4.84E-156 | -0.44783255 | 0.056 | 0.259 | 1.22E-151 | HTC | PPAP2B      |
| SWAP70        | 1.88E-154 | 0.322234221 | 0.536 | 0.332 | 4.75E-150 | HTC | SWAP70      |
| TPT1          | 5.64E-154 | -0.31396318 | 0.999 | 1     | 1.42E-149 | HTC | TPT1        |



|            |           |             |       |       |           |     |          |
|------------|-----------|-------------|-------|-------|-----------|-----|----------|
| CUTA       | 3.85E-153 | 0.336575276 | 0.915 | 0.802 | 9.71E-149 | HTC | CUTA     |
| TSPAN3     | 3.30E-152 | 0.348217931 | 0.792 | 0.631 | 8.32E-148 | HTC | TSPAN3   |
| BTG1       | 9.51E-152 | -0.72841014 | 0.897 | 0.937 | 2.40E-147 | HTC | BTG1     |
| EIF4A1     | 1.92E-150 | -0.44401472 | 0.934 | 0.962 | 4.85E-146 | HTC | EIF4A1   |
| SLC22A17   | 5.21E-147 | 0.337937015 | 0.711 | 0.525 | 1.31E-142 | HTC | SLC22A17 |
| MYL12A     | 3.04E-146 | 0.349819629 | 0.925 | 0.825 | 7.67E-142 | HTC | MYL12A   |
| SEMA3A     | 5.65E-146 | -0.35571961 | 0.085 | 0.29  | 1.42E-141 | HTC | SEMA3A   |
| OSMR       | 8.02E-145 | -0.49812989 | 0.429 | 0.624 | 2.02E-140 | HTC | OSMR     |
| VASP       | 9.53E-145 | 0.268086841 | 0.487 | 0.287 | 2.40E-140 | HTC | VASP     |
| STK17A     | 1.79E-144 | 0.380809915 | 0.606 | 0.414 | 4.50E-140 | HTC | STK17A   |
| CNN3       | 3.56E-144 | -0.47709086 | 0.785 | 0.879 | 8.97E-140 | HTC | CNN3     |
| DLC1       | 1.93E-143 | -0.30975544 | 0.137 | 0.348 | 4.86E-139 | HTC | DLC1     |
| CDON       | 3.53E-143 | -0.39645435 | 0.266 | 0.477 | 8.89E-139 | HTC | CDON     |
| WIF1.1     | 1.56E-142 | 0.491679668 | 0.411 | 0.219 | 3.92E-138 | HTC | WIF1     |
| COX6C      | 4.17E-142 | 0.315210651 | 0.972 | 0.933 | 1.05E-137 | HTC | COX6C    |
| SLC39A14.1 | 1.38E-141 | -0.5077181  | 0.663 | 0.762 | 3.47E-137 | HTC | SLC39A14 |
| SOX4       | 3.12E-141 | -0.60555025 | 0.336 | 0.552 | 7.86E-137 | HTC | SOX4     |
| UXS1       | 2.54E-140 | 0.313688248 | 0.617 | 0.43  | 6.40E-136 | HTC | UXS1     |
| HSPA8      | 5.45E-140 | -0.45862128 | 0.873 | 0.921 | 1.37E-135 | HTC | HSPA8    |
| SEC11C     | 4.04E-137 | 0.345082738 | 0.607 | 0.426 | 1.02E-132 | HTC | SEC11C   |
| SLC20A1    | 7.03E-137 | 0.453194211 | 0.761 | 0.605 | 1.77E-132 | HTC | SLC20A1  |
| TGFB1      | 2.32E-136 | 0.317831989 | 0.647 | 0.461 | 5.84E-132 | HTC | TGFB1    |
| MT1M       | 2.70E-136 | -0.61693863 | 0.717 | 0.836 | 6.79E-132 | HTC | MT1M     |
| ERRF1      | 4.45E-136 | -0.78015746 | 0.687 | 0.8   | 1.12E-131 | HTC | ERRF1    |
| BSG        | 7.58E-136 | 0.304614219 | 0.953 | 0.876 | 1.91E-131 | HTC | BSG      |
| SMDT1      | 1.35E-133 | 0.316555839 | 0.802 | 0.651 | 3.41E-129 | HTC | SMDT1    |
| TXN.1      | 1.82E-133 | -0.44896652 | 0.846 | 0.887 | 4.59E-129 | HTC | TXN      |
| NPC2       | 2.59E-133 | 0.314982168 | 0.985 | 0.943 | 6.54E-129 | HTC | NPC2     |
| IFI6       | 1.11E-132 | 0.265544649 | 0.655 | 0.466 | 2.78E-128 | HTC | IFI6     |
| HSPB2      | 2.43E-131 | 0.256758256 | 0.409 | 0.229 | 6.12E-127 | HTC | HSPB2    |
| FAM46A     | 3.03E-131 | 0.425210878 | 0.849 | 0.718 | 7.63E-127 | HTC | FAM46A   |
| WWP2.1     | 3.18E-131 | 0.365880757 | 0.942 | 0.821 | 8.02E-127 | HTC | WWP2     |
| C1S        | 6.21E-131 | -0.46464637 | 0.772 | 0.869 | 1.56E-126 | HTC | C1S      |
| GNPTG      | 9.32E-131 | 0.285772089 | 0.552 | 0.367 | 2.35E-126 | HTC | GNPTG    |
| GLI3       | 4.14E-130 | -0.38890242 | 0.278 | 0.473 | 1.04E-125 | HTC | GLI3     |
| CILP       | 6.04E-130 | 0.644943512 | 0.964 | 0.903 | 1.52E-125 | HTC | CILP     |
| PTGES.1    | 1.68E-127 | -0.73133853 | 0.215 | 0.397 | 4.23E-123 | HTC | PTGES    |
| EMC10      | 3.73E-127 | 0.332034261 | 0.695 | 0.53  | 9.39E-123 | HTC | EMC10    |
| HES1.1     | 4.04E-127 | 0.559723401 | 0.656 | 0.478 | 1.02E-122 | HTC | HES1     |
| SLC25A6    | 5.84E-127 | -0.31190841 | 0.944 | 0.956 | 1.47E-122 | HTC | SLC25A6  |
| LOXL2      | 1.03E-126 | -0.37631081 | 0.106 | 0.293 | 2.59E-122 | HTC | LOXL2    |
| FGF1       | 6.10E-126 | 0.339440864 | 0.624 | 0.446 | 1.54E-121 | HTC | FGF1     |
| TCF4.1     | 7.47E-126 | -0.4234391  | 0.458 | 0.619 | 1.88E-121 | HTC | TCF4     |
| PMEPA1     | 3.28E-125 | 0.408194967 | 0.862 | 0.75  | 8.27E-121 | HTC | PMEPA1   |
| ITGB1      | 3.75E-125 | -0.386434   | 0.709 | 0.804 | 9.45E-121 | HTC | ITGB1    |
| PRELP      | 5.36E-125 | 0.464958145 | 0.999 | 0.997 | 1.35E-120 | HTC | PRELP    |
| TNNT3      | 8.14E-124 | -0.57531371 | 0.167 | 0.364 | 2.05E-119 | HTC | TNNT3    |
| YWHAQ      | 1.34E-123 | -0.34769881 | 0.834 | 0.884 | 3.38E-119 | HTC | YWHAQ    |
| RPS4X      | 1.52E-123 | -0.28211536 | 1     | 1     | 3.84E-119 | HTC | RPS4X    |
| FRMD4B     | 2.38E-123 | -0.33957159 | 0.319 | 0.51  | 5.99E-119 | HTC | FRMD4B   |
| LRRFIP1    | 3.06E-123 | 0.33194058  | 0.874 | 0.741 | 7.70E-119 | HTC | LRRFIP1  |
| TPPP3.1    | 4.65E-123 | -0.87652329 | 0.112 | 0.295 | 1.17E-118 | HTC | TPPP3    |
| ADK        | 2.20E-122 | 0.278886925 | 0.589 | 0.407 | 5.53E-118 | HTC | ADK      |
| HSPB1.1    | 3.17E-122 | 0.475792892 | 0.973 | 0.943 | 7.98E-118 | HTC | HSPB1    |
| SSFA2      | 4.84E-121 | 0.250345041 | 0.362 | 0.198 | 1.22E-116 | HTC | SSFA2    |
| ACKR3      | 6.29E-121 | -0.34193543 | 0.081 | 0.259 | 1.58E-116 | HTC | ACKR3    |
| CYB5D2     | 6.52E-120 | 0.274016669 | 0.635 | 0.451 | 1.64E-115 | HTC | CYB5D2   |
| HNRNPA1    | 4.47E-119 | -0.27483277 | 0.997 | 0.998 | 1.13E-114 | HTC | HNRNPA1  |
| UQCR10     | 5.44E-119 | 0.295817716 | 0.89  | 0.784 | 1.37E-114 | HTC | UQCR10   |
| RNF130     | 3.14E-118 | 0.316053489 | 0.754 | 0.61  | 7.92E-114 | HTC | RNF130   |

|                 |           |             |       |       |           |     |               |
|-----------------|-----------|-------------|-------|-------|-----------|-----|---------------|
| IRF1            | 1.98E-117 | -0.62431548 | 0.343 | 0.533 | 4.98E-113 | HTC | IRF1          |
| VCAN.1          | 9.32E-117 | -0.59264162 | 0.115 | 0.296 | 2.35E-112 | HTC | VCAN          |
| MPP6            | 1.24E-116 | 0.29798474  | 0.616 | 0.44  | 3.12E-112 | HTC | MPP6          |
| KAL1            | 1.83E-116 | -0.26783864 | 0.085 | 0.261 | 4.60E-112 | HTC | KAL1          |
| NDUFA3          | 1.85E-116 | 0.297902249 | 0.757 | 0.611 | 4.65E-112 | HTC | NDUFA3        |
| NBL1.1          | 3.20E-115 | -0.45174356 | 0.034 | 0.187 | 8.06E-111 | HTC | NBL1          |
| UGP2.1          | 4.53E-115 | -0.44802912 | 0.86  | 0.877 | 1.14E-110 | HTC | UGP2          |
| VCAM1.1         | 2.91E-114 | -0.85329065 | 0.043 | 0.198 | 7.33E-110 | HTC | VCAM1         |
| LARP6           | 3.80E-114 | 0.311132237 | 0.596 | 0.423 | 9.57E-110 | HTC | LARP6         |
| PNKD            | 9.75E-114 | 0.277999702 | 0.771 | 0.62  | 2.46E-109 | HTC | PNKD          |
| MXRA8           | 1.10E-113 | -0.36253308 | 0.66  | 0.788 | 2.76E-109 | HTC | MXRA8         |
| TSPAN2          | 1.90E-113 | -0.55981152 | 0.626 | 0.726 | 4.78E-109 | HTC | TSPAN2        |
| ERG             | 6.96E-113 | -0.31114374 | 0.237 | 0.424 | 1.75E-108 | HTC | ERG           |
| MT-ND4.1        | 8.25E-113 | 0.369390978 | 0.969 | 0.951 | 2.08E-108 | HTC | MT-ND4        |
| NTN1.1          | 9.93E-113 | -0.25862932 | 0.049 | 0.208 | 2.50E-108 | HTC | NTN1          |
| ATP1B1          | 3.28E-112 | -0.3926351  | 0.506 | 0.659 | 8.28E-108 | HTC | ATP1B1        |
| PPP1R3C.1       | 3.44E-112 | 0.391446846 | 0.827 | 0.678 | 8.66E-108 | HTC | PPP1R3C       |
| FKBP8           | 4.78E-112 | 0.281041651 | 0.909 | 0.83  | 1.20E-107 | HTC | FKBP8         |
| NDFIP1          | 7.59E-112 | -0.32837045 | 0.858 | 0.9   | 1.91E-107 | HTC | NDFIP1        |
| ATF3.1          | 3.18E-110 | 0.361943814 | 0.744 | 0.562 | 8.02E-106 | HTC | ATF3          |
| NT5E.1          | 7.31E-110 | -0.44541832 | 0.344 | 0.5   | 1.84E-105 | HTC | NT5E          |
| SNHG18          | 8.94E-110 | 0.28139982  | 0.651 | 0.478 | 2.25E-105 | HTC | SNHG18        |
| MT-ND5          | 9.88E-110 | 0.378398946 | 0.962 | 0.929 | 2.49E-105 | HTC | MT-ND5        |
| COX14           | 1.09E-109 | 0.276715086 | 0.815 | 0.686 | 2.74E-105 | HTC | COX14         |
| SDC1            | 1.47E-109 | -0.28904642 | 0.13  | 0.307 | 3.70E-105 | HTC | SDC1          |
| CCND1.1         | 3.89E-109 | -0.33134391 | 0.025 | 0.169 | 9.81E-105 | HTC | CCND1         |
| TNFAIP6.1       | 4.47E-109 | -1.44138096 | 0.068 | 0.223 | 1.13E-104 | HTC | TNFAIP6       |
| CETN2           | 8.13E-109 | 0.280318907 | 0.666 | 0.5   | 2.05E-104 | HTC | CETN2         |
| RARRES2.1       | 1.23E-108 | -0.53119265 | 0.204 | 0.389 | 3.11E-104 | HTC | RARRES2       |
| DBI             | 1.12E-107 | 0.348565686 | 0.93  | 0.864 | 2.82E-103 | HTC | DBI           |
| HEBP1           | 3.73E-106 | 0.267889583 | 0.672 | 0.513 | 9.40E-102 | HTC | HEBP1         |
| FGFR2           | 4.22E-106 | -0.2930027  | 0.152 | 0.328 | 1.06E-101 | HTC | FGFR2         |
| LDHA            | 1.27E-105 | -0.28159516 | 0.997 | 0.997 | 3.20E-101 | HTC | LDHA          |
| KLF10.1         | 2.19E-105 | 0.393762311 | 0.727 | 0.575 | 5.52E-101 | HTC | KLF10         |
| RPSA            | 8.18E-105 | -0.25862588 | 0.995 | 0.993 | 2.06E-100 | HTC | RPSA          |
| METTL7A.1       | 2.82E-104 | 0.252987227 | 0.685 | 0.488 | 7.12E-100 | HTC | METTL7A       |
| VOPP1           | 1.46E-103 | 0.26250689  | 0.662 | 0.5   | 3.68E-99  | HTC | VOPP1         |
| CCND2           | 3.93E-103 | -0.30103813 | 0.226 | 0.403 | 9.90E-99  | HTC | CCND2         |
| PLAGL1          | 4.85E-103 | -0.27355232 | 0.267 | 0.452 | 1.22E-98  | HTC | PLAGL1        |
| MT-CO1.1        | 7.00E-103 | 0.427621362 | 0.964 | 0.945 | 1.76E-98  | HTC | MT-CO1        |
| TMED4           | 3.68E-102 | 0.268602851 | 0.807 | 0.69  | 9.27E-98  | HTC | TMED4         |
| HTRA1.1         | 4.48E-102 | -1.57096759 | 0.8   | 0.828 | 1.13E-97  | HTC | HTRA1         |
| ZSCAN16-AS1     | 9.64E-102 | 0.252898796 | 0.639 | 0.467 | 2.43E-97  | HTC | ZSCAN16-AS1   |
| ID1.1           | 3.94E-101 | -0.56221122 | 0.549 | 0.719 | 9.92E-97  | HTC | ID1           |
| PCOLCE2         | 4.28E-101 | 0.268460437 | 0.996 | 0.971 | 1.08E-96  | HTC | PCOLCE2       |
| TALDO1          | 5.83E-101 | 0.273562046 | 0.726 | 0.585 | 1.47E-96  | HTC | TALDO1        |
| MMP3.1          | 7.72E-101 | -1.60515241 | 0.441 | 0.578 | 1.95E-96  | HTC | MMP3          |
| HIF1A           | 9.02E-101 | -0.36507548 | 0.645 | 0.765 | 2.27E-96  | HTC | HIF1A         |
| VGLL4           | 1.67E-100 | 0.296174606 | 0.794 | 0.654 | 4.21E-96  | HTC | VGLL4         |
| UACA            | 2.07E-100 | 0.272033105 | 0.531 | 0.361 | 5.21E-96  | HTC | UACA          |
| CYR61.1         | 3.73E-100 | 0.424770178 | 0.967 | 0.937 | 9.40E-96  | HTC | CYR61         |
| C4orf3          | 4.40E-100 | 0.283402324 | 0.971 | 0.942 | 1.11E-95  | HTC | C4orf3        |
| MT1X            | 5.13E-100 | -0.41849809 | 0.984 | 0.995 | 1.29E-95  | HTC | MT1X          |
| SULF2           | 5.55E-100 | -0.31585512 | 0.406 | 0.57  | 1.40E-95  | HTC | SULF2         |
| COL6A3.1        | 6.49E-100 | -0.87776308 | 0.476 | 0.583 | 1.63E-95  | HTC | COL6A3        |
| RP11-983P16.4.1 | 2.65E-99  | 0.265534531 | 0.703 | 0.527 | 6.67E-95  | HTC | RP11-983P16.4 |
| SLC25A3         | 4.76E-99  | -0.27113636 | 0.905 | 0.927 | 1.20E-94  | HTC | SLC25A3       |
| TOB1            | 1.20E-98  | 0.337937148 | 0.745 | 0.607 | 3.02E-94  | HTC | TOB1          |
| TCEAL2          | 3.61E-98  | 0.265206327 | 0.882 | 0.756 | 9.11E-94  | HTC | TCEAL2        |
| THBS4           | 5.47E-98  | -0.32628847 | 0.057 | 0.202 | 1.38E-93  | HTC | THBS4         |

|           |          |             |       |       |          |     |           |
|-----------|----------|-------------|-------|-------|----------|-----|-----------|
| THBS1     | 3.63E-97 | -0.51394976 | 0.316 | 0.475 | 9.16E-93 | HTC | THBS1     |
| UGDH      | 5.82E-96 | -0.36619092 | 0.529 | 0.646 | 1.47E-91 | HTC | UGDH      |
| ANGPTL4.1 | 8.03E-96 | -0.64463963 | 0.478 | 0.647 | 2.02E-91 | HTC | ANGPTL4   |
| SMOC2.1   | 1.52E-95 | -0.5152619  | 0.886 | 0.909 | 3.84E-91 | HTC | SMOC2     |
| ANK3.1    | 1.59E-95 | -0.34876137 | 0.205 | 0.375 | 4.02E-91 | HTC | ANK3      |
| C5orf15   | 2.36E-95 | -0.35572837 | 0.624 | 0.73  | 5.94E-91 | HTC | C5orf15   |
| FAM43A.1  | 9.18E-95 | 0.273622941 | 0.384 | 0.229 | 2.31E-90 | HTC | FAM43A    |
| HNRNPA0   | 4.29E-94 | -0.29153245 | 0.813 | 0.881 | 1.08E-89 | HTC | HNRNPA0   |
| TUBA1B    | 5.89E-94 | -0.4286666  | 0.885 | 0.908 | 1.49E-89 | HTC | TUBA1B    |
| TMSB4X.1  | 6.56E-94 | -1.70554741 | 0.721 | 0.785 | 1.65E-89 | HTC | TMSB4X    |
| MATN3.1   | 2.62E-93 | -0.72694617 | 0.428 | 0.577 | 6.61E-89 | HTC | MATN3     |
| SNAI1     | 4.00E-93 | 0.274444109 | 0.551 | 0.383 | 1.01E-88 | HTC | SNAI1     |
| LINC01116 | 4.45E-93 | -0.27291297 | 0.361 | 0.526 | 1.12E-88 | HTC | LINC01116 |
| FOXP1     | 7.69E-93 | -0.30381963 | 0.291 | 0.461 | 1.94E-88 | HTC | FOXP1     |
| GRN       | 1.55E-92 | -0.34375516 | 0.601 | 0.697 | 3.91E-88 | HTC | GRN       |
| DDX5      | 2.14E-92 | -0.40139207 | 0.982 | 0.99  | 5.39E-88 | HTC | DDX5      |
| CD8B      | 2.77E-92 | 0.253883069 | 0.479 | 0.323 | 6.97E-88 | HTC | CD8B      |
| HDDC2     | 3.27E-92 | 0.263529698 | 0.803 | 0.674 | 8.23E-88 | HTC | HDDC2     |
| TIMP4.1   | 4.56E-92 | 0.389860342 | 0.742 | 0.637 | 1.15E-87 | HTC | TIMP4     |
| OSTC.1    | 5.94E-92 | -0.35991726 | 0.84  | 0.845 | 1.50E-87 | HTC | OSTC      |
| SERINC3   | 4.26E-91 | 0.25575897  | 0.785 | 0.67  | 1.07E-86 | HTC | SERINC3   |
| RGCC      | 4.86E-91 | 0.360299807 | 0.831 | 0.709 | 1.23E-86 | HTC | RGCC      |
| FBLN7     | 1.52E-90 | -0.30080978 | 0.158 | 0.313 | 3.82E-86 | HTC | FBLN7     |
| IGFBP4.1  | 1.19E-89 | -0.32157467 | 0.072 | 0.216 | 2.99E-85 | HTC | IGFBP4    |
| PTN       | 1.81E-89 | -0.36752053 | 0.102 | 0.252 | 4.57E-85 | HTC | PTN       |
| GJA1.1    | 1.81E-89 | -0.27945499 | 0.137 | 0.295 | 4.57E-85 | HTC | GJA1      |
| RUNX1     | 2.29E-89 | -0.32908118 | 0.498 | 0.644 | 5.76E-85 | HTC | RUNX1     |
| KDEL3     | 8.06E-89 | 0.269456461 | 0.752 | 0.585 | 2.03E-84 | HTC | KDEL3     |
| LGALS3    | 1.95E-88 | 0.360670806 | 0.992 | 0.983 | 4.91E-84 | HTC | LGALS3    |
| PPA1      | 2.02E-88 | -0.29178377 | 0.666 | 0.746 | 5.09E-84 | HTC | PPA1      |
| SSTR2     | 3.26E-88 | 0.256949733 | 0.35  | 0.204 | 8.20E-84 | HTC | SSTR2     |
| CFH.1     | 6.76E-88 | -1.00150587 | 0.957 | 0.945 | 1.70E-83 | HTC | CFH       |
| C9orf3    | 9.42E-88 | -0.32801271 | 0.71  | 0.793 | 2.37E-83 | HTC | C9orf3    |
| LMNA      | 2.75E-86 | -0.47362017 | 0.935 | 0.949 | 6.92E-82 | HTC | LMNA      |
| ADAMTS5.1 | 8.50E-86 | -0.28857822 | 0.031 | 0.153 | 2.14E-81 | HTC | ADAMTS5   |
| NTRK2     | 2.67E-85 | 0.271506348 | 0.558 | 0.392 | 6.74E-81 | HTC | NTRK2     |
| COLGALT2  | 5.92E-85 | 0.276419104 | 0.648 | 0.494 | 1.49E-80 | HTC | COLGALT2  |
| PID1      | 1.04E-84 | 0.275798576 | 0.792 | 0.631 | 2.62E-80 | HTC | PID1      |
| COL2A1    | 1.14E-84 | -1.39772252 | 0.955 | 0.928 | 2.88E-80 | HTC | COL2A1    |
| ANK2      | 1.39E-84 | -0.25000827 | 0.086 | 0.229 | 3.51E-80 | HTC | ANK2      |
| ECM1.1    | 1.88E-84 | -0.30154072 | 0.043 | 0.169 | 4.74E-80 | HTC | ECM1      |
| EPB41L2   | 2.65E-84 | -0.29590499 | 0.453 | 0.606 | 6.67E-80 | HTC | EPB41L2   |
| FHL1      | 2.00E-82 | -0.40735503 | 0.798 | 0.853 | 5.05E-78 | HTC | FHL1      |
| HSPG2     | 3.13E-82 | -0.27898765 | 0.253 | 0.412 | 7.88E-78 | HTC | HSPG2     |
| SCPEP1    | 6.47E-82 | 0.266995708 | 0.691 | 0.566 | 1.63E-77 | HTC | SCPEP1    |
| ANXA2     | 1.34E-81 | -0.3224789  | 0.983 | 0.981 | 3.38E-77 | HTC | ANXA2     |
| PHLDA2    | 2.35E-81 | 0.553244295 | 0.696 | 0.555 | 5.92E-77 | HTC | PHLDA2    |
| PLXDC2    | 2.92E-81 | -0.27602683 | 0.779 | 0.843 | 7.35E-77 | HTC | PLXDC2    |
| PPIC      | 3.35E-81 | -0.40803623 | 0.714 | 0.747 | 8.44E-77 | HTC | PPIC      |
| TNFRSF1A  | 7.98E-81 | -0.28392808 | 0.628 | 0.729 | 2.01E-76 | HTC | TNFRSF1A  |
| CD44      | 2.37E-80 | -0.38976838 | 0.581 | 0.706 | 5.97E-76 | HTC | CD44      |
| LOXL3     | 5.22E-80 | -0.27351584 | 0.228 | 0.378 | 1.32E-75 | HTC | LOXL3     |
| MT1E      | 7.32E-80 | -0.29287895 | 0.979 | 0.993 | 1.84E-75 | HTC | MT1E      |
| EIF4G2    | 7.81E-80 | -0.2604449  | 0.818 | 0.867 | 1.97E-75 | HTC | EIF4G2    |
| PRG4.1    | 1.78E-79 | -3.14692644 | 0.274 | 0.404 | 4.47E-75 | HTC | PRG4      |
| MGAT1     | 4.52E-79 | -0.2550479  | 0.414 | 0.554 | 1.14E-74 | HTC | MGAT1     |
| NR1D1.1   | 1.89E-78 | 0.268625043 | 0.802 | 0.669 | 4.76E-74 | HTC | NR1D1     |
| RPL17     | 4.35E-78 | -0.26512591 | 0.881 | 0.914 | 1.10E-73 | HTC | RPL17     |
| EPS8      | 6.35E-78 | 0.252932015 | 0.706 | 0.581 | 1.60E-73 | HTC | EPS8      |
| PROCR.1   | 6.55E-77 | -0.35922075 | 0.414 | 0.541 | 1.65E-72 | HTC | PROCR     |

|           |          |             |       |       |          |     |           |
|-----------|----------|-------------|-------|-------|----------|-----|-----------|
| DLX5.1    | 7.42E-77 | 0.275750718 | 0.619 | 0.471 | 1.87E-72 | HTC | DLX5      |
| S100A11.1 | 1.00E-76 | -0.38563799 | 0.969 | 0.964 | 2.53E-72 | HTC | S100A11   |
| IFI16     | 4.19E-76 | -0.27906276 | 0.238 | 0.389 | 1.06E-71 | HTC | IFI16     |
| ARL4D     | 6.87E-76 | 0.255605712 | 0.408 | 0.266 | 1.73E-71 | HTC | ARL4D     |
| IER5      | 6.83E-75 | 0.269383806 | 0.585 | 0.439 | 1.72E-70 | HTC | IER5      |
| ISLR.1    | 4.27E-74 | -0.49686042 | 0.709 | 0.761 | 1.08E-69 | HTC | ISLR      |
| RBM3      | 1.25E-73 | -0.25057405 | 0.896 | 0.921 | 3.16E-69 | HTC | RBM3      |
| NRP2      | 1.83E-73 | -0.28740325 | 0.198 | 0.341 | 4.62E-69 | HTC | NRP2      |
| ADM.1     | 2.24E-73 | 0.292710892 | 0.621 | 0.464 | 5.63E-69 | HTC | ADM       |
| RSL24D1   | 1.76E-71 | -0.2586848  | 0.862 | 0.89  | 4.44E-67 | HTC | RSL24D1   |
| CD55.1    | 3.59E-70 | -1.10445478 | 0.682 | 0.729 | 9.04E-66 | HTC | CD55      |
| DKK3.1    | 1.14E-69 | -0.40748003 | 0.299 | 0.447 | 2.87E-65 | HTC | DKK3      |
| SERPINH1  | 2.67E-69 | -0.30498992 | 0.486 | 0.617 | 6.73E-65 | HTC | SERPINH1  |
| KIAA0040  | 3.35E-69 | -0.37764645 | 0.557 | 0.664 | 8.43E-65 | HTC | KIAA0040  |
| STEAP1    | 7.55E-69 | -0.27131769 | 0.266 | 0.404 | 1.90E-64 | HTC | STEAP1    |
| THBD      | 1.05E-68 | -0.27476163 | 0.067 | 0.185 | 2.65E-64 | HTC | THBD      |
| PLAUR.1   | 4.59E-67 | -0.33967945 | 0.219 | 0.352 | 1.16E-62 | HTC | PLAUR     |
| CCDC85B   | 5.70E-67 | -0.28598488 | 0.703 | 0.775 | 1.44E-62 | HTC | CCDC85B   |
| CD164     | 1.17E-66 | 0.362651628 | 0.815 | 0.747 | 2.96E-62 | HTC | CD164     |
| C19orf10  | 1.35E-66 | 0.273044452 | 0.967 | 0.913 | 3.41E-62 | HTC | C19orf10  |
| LSP1      | 1.46E-66 | -0.31427441 | 0.865 | 0.895 | 3.69E-62 | HTC | LSP1      |
| CDC42EP3  | 2.15E-66 | -0.25559783 | 0.19  | 0.326 | 5.43E-62 | HTC | CDC42EP3  |
| PLSCR1    | 2.74E-66 | -0.27869614 | 0.255 | 0.394 | 6.90E-62 | HTC | PLSCR1    |
| MT-CO2.1  | 2.73E-65 | 0.269672786 | 0.97  | 0.946 | 6.88E-61 | HTC | MT-CO2    |
| PDK4      | 3.56E-65 | -0.51309876 | 0.146 | 0.276 | 8.98E-61 | HTC | PDK4      |
| ZFP36L2   | 5.69E-65 | -0.26886486 | 0.241 | 0.387 | 1.43E-60 | HTC | ZFP36L2   |
| FLOT1     | 7.39E-65 | -0.25940566 | 0.629 | 0.721 | 1.86E-60 | HTC | FLOT1     |
| MYC       | 2.21E-64 | -0.41868146 | 0.195 | 0.334 | 5.57E-60 | HTC | MYC       |
| HIST1H1C  | 4.14E-64 | 0.38742712  | 0.377 | 0.253 | 1.04E-59 | HTC | HIST1H1C  |
| MT2A      | 4.35E-64 | -0.3567204  | 0.997 | 0.999 | 1.10E-59 | HTC | MT2A      |
| TNFRSF12A | 5.52E-63 | -0.44486269 | 0.651 | 0.711 | 1.39E-58 | HTC | TNFRSF12A |
| MAP7D3    | 9.43E-63 | -0.27894086 | 0.419 | 0.548 | 2.38E-58 | HTC | MAP7D3    |
| PFN1      | 9.55E-63 | -0.35701904 | 0.885 | 0.887 | 2.41E-58 | HTC | PFN1      |
| NGF       | 1.49E-62 | -0.30174129 | 0.126 | 0.253 | 3.76E-58 | HTC | NGF       |
| CAPZB.1   | 6.10E-62 | -0.34135426 | 0.573 | 0.652 | 1.54E-57 | HTC | CAPZB     |
| CAST      | 2.23E-61 | -0.27229286 | 0.491 | 0.599 | 5.62E-57 | HTC | CAST      |
| CDO1      | 3.16E-61 | -0.32161197 | 0.966 | 0.962 | 7.97E-57 | HTC | CDO1      |
| HMG2      | 5.12E-61 | -0.26260515 | 0.861 | 0.898 | 1.29E-56 | HTC | HMG2      |
| CYP1B1    | 5.96E-61 | -0.38111714 | 0.253 | 0.388 | 1.50E-56 | HTC | CYP1B1    |
| RSPO2     | 4.71E-60 | -0.32686988 | 0.202 | 0.326 | 1.19E-55 | HTC | RSPO2     |
| ZNF503    | 1.32E-59 | -0.27786225 | 0.333 | 0.467 | 3.32E-55 | HTC | ZNF503    |
| PAPPA.1   | 1.40E-59 | -0.27545232 | 0.034 | 0.129 | 3.54E-55 | HTC | PAPPA     |
| FN1.1     | 1.92E-59 | 0.339285916 | 1     | 0.999 | 4.84E-55 | HTC | FN1       |
| PNRC1.1   | 2.80E-59 | -0.36295654 | 0.718 | 0.787 | 7.07E-55 | HTC | PNRC1     |
| HMOX1     | 4.34E-59 | -1.08047248 | 0.282 | 0.401 | 1.09E-54 | HTC | HMOX1     |
| SLC7A2.1  | 2.08E-58 | -0.3937508  | 0.274 | 0.389 | 5.24E-54 | HTC | SLC7A2    |
| ADAMTS1   | 3.61E-58 | -0.36408087 | 0.097 | 0.209 | 9.09E-54 | HTC | ADAMTS1   |
| COL9A1.1  | 4.71E-58 | -0.43070593 | 0.144 | 0.258 | 1.19E-53 | HTC | COL9A1    |
| DNER      | 3.88E-57 | 0.276718751 | 0.299 | 0.195 | 9.78E-53 | HTC | DNER      |
| CNIH1.1   | 5.62E-57 | -0.26218856 | 0.63  | 0.693 | 1.42E-52 | HTC | CNIH1     |
| RPN2      | 9.60E-56 | 0.261130544 | 0.888 | 0.821 | 2.42E-51 | HTC | RPN2      |
| TSC22D1.1 | 1.80E-55 | -0.48727781 | 0.987 | 0.973 | 4.54E-51 | HTC | TSC22D1   |
| TREM1.1   | 3.82E-55 | -0.27895967 | 0.02  | 0.102 | 9.61E-51 | HTC | TREM1     |
| SEPW1     | 7.64E-55 | -0.2638574  | 0.751 | 0.784 | 1.93E-50 | HTC | SEPW1     |
| GFPT2     | 8.82E-55 | -0.26064736 | 0.205 | 0.331 | 2.22E-50 | HTC | GFPT2     |
| AQP1.1    | 5.03E-54 | -0.51380827 | 0.032 | 0.118 | 1.27E-49 | HTC | AQP1      |
| MT1A      | 8.90E-53 | -0.4413606  | 0.315 | 0.432 | 2.24E-48 | HTC | MT1A      |
| ICAM1.1   | 2.15E-52 | -0.59296145 | 0.423 | 0.53  | 5.43E-48 | HTC | ICAM1     |
| DST.1     | 4.51E-52 | -0.27034416 | 0.789 | 0.817 | 1.14E-47 | HTC | DST       |
| MT-CO3.1  | 5.16E-52 | 0.323114207 | 0.969 | 0.949 | 1.30E-47 | HTC | MT-CO3    |

|            |          |             |       |       |          |      |          |
|------------|----------|-------------|-------|-------|----------|------|----------|
| PDLIM7.1   | 6.81E-52 | -0.26586391 | 0.222 | 0.336 | 1.72E-47 | HTC  | PDLIM7   |
| TRPS1.1    | 2.47E-50 | -0.25642446 | 0.483 | 0.572 | 6.21E-46 | HTC  | TRPS1    |
| DNAJA1     | 1.03E-49 | -0.2880371  | 0.721 | 0.784 | 2.60E-45 | HTC  | DNAJA1   |
| AMTN.1     | 2.17E-49 | -0.45733804 | 0.037 | 0.12  | 5.46E-45 | HTC  | AMTN     |
| FUS        | 9.41E-49 | -0.25794516 | 0.889 | 0.914 | 2.37E-44 | HTC  | FUS      |
| HEXIM1     | 2.85E-48 | -0.29281758 | 0.465 | 0.575 | 7.17E-44 | HTC  | HEXIM1   |
| ANXA4.1    | 3.14E-48 | -0.27935446 | 0.488 | 0.577 | 7.90E-44 | HTC  | ANXA4    |
| MTHFD2     | 4.64E-48 | -0.27002525 | 0.406 | 0.514 | 1.17E-43 | HTC  | MTHFD2   |
| MEG3.1     | 2.60E-47 | 0.328337179 | 0.621 | 0.501 | 6.55E-43 | HTC  | MEG3     |
| GLRX.1     | 5.69E-47 | -0.4579374  | 0.4   | 0.495 | 1.43E-42 | HTC  | GLRX     |
| CCL2.1     | 1.19E-46 | -0.82512238 | 0.128 | 0.229 | 3.00E-42 | HTC  | CCL2     |
| COL1A1.1   | 4.23E-46 | -1.78915922 | 0.062 | 0.148 | 1.07E-41 | HTC  | COL1A1   |
| MT1H       | 5.59E-46 | -0.38120837 | 0.171 | 0.282 | 1.41E-41 | HTC  | MT1H     |
| LAG3       | 1.17E-44 | -0.27653045 | 0.413 | 0.518 | 2.94E-40 | HTC  | LAG3     |
| MTRNR2L2   | 2.76E-44 | 0.25301245  | 0.573 | 0.458 | 6.95E-40 | HTC  | MTRNR2L2 |
| HSPD1      | 5.13E-41 | -0.250745   | 0.81  | 0.833 | 1.29E-36 | HTC  | HSPD1    |
| GADD45B.1  | 6.24E-41 | 0.329558111 | 0.938 | 0.918 | 1.57E-36 | HTC  | GADD45B  |
| WTAP       | 3.88E-40 | -0.32198921 | 0.6   | 0.666 | 9.77E-36 | HTC  | WTAP     |
| BIRC3      | 4.39E-39 | -0.29957022 | 0.032 | 0.1   | 1.11E-34 | HTC  | BIRC3    |
| IBTK       | 1.74E-38 | 0.253167503 | 0.472 | 0.384 | 4.39E-34 | HTC  | IBTK     |
| SLC40A1    | 6.98E-38 | -0.33415782 | 0.268 | 0.36  | 1.76E-33 | HTC  | SLC40A1  |
| GREM1.1    | 2.12E-37 | -0.49924341 | 0.177 | 0.271 | 5.34E-33 | HTC  | GREM1    |
| S100A4.1   | 2.29E-37 | -1.54269912 | 0.599 | 0.619 | 5.78E-33 | HTC  | S100A4   |
| NFATC2     | 2.24E-36 | -0.27775355 | 0.473 | 0.563 | 5.65E-32 | HTC  | NFATC2   |
| NAMPT      | 3.81E-35 | -0.26557187 | 0.376 | 0.464 | 9.60E-31 | HTC  | NAMPT    |
| GPRC5A     | 8.19E-34 | -0.266651   | 0.442 | 0.539 | 2.06E-29 | HTC  | GPRC5A   |
| CALD1      | 9.16E-34 | -0.36815929 | 0.767 | 0.786 | 2.31E-29 | HTC  | CALD1    |
| SAA1       | 2.64E-33 | -0.8342995  | 0.04  | 0.102 | 6.64E-29 | HTC  | SAA1     |
| TSC22D3    | 6.66E-33 | 0.330405345 | 0.893 | 0.841 | 1.68E-28 | HTC  | TSC22D3  |
| TAGLN2.1   | 6.32E-32 | -0.38281372 | 0.813 | 0.791 | 1.59E-27 | HTC  | TAGLN2   |
| CRLF1.1    | 6.83E-32 | -0.52388392 | 0.179 | 0.256 | 1.72E-27 | HTC  | CRLF1    |
| STEAP4.1   | 3.86E-31 | -0.31139286 | 0.048 | 0.11  | 9.72E-27 | HTC  | STEAP4   |
| SERPINE1   | 3.95E-30 | 0.349082522 | 0.486 | 0.409 | 9.94E-26 | HTC  | SERPINE1 |
| ARRDC3     | 3.35E-29 | -0.26951953 | 0.288 | 0.369 | 8.44E-25 | HTC  | ARRDC3   |
| GLUL       | 5.18E-29 | -0.32419353 | 0.508 | 0.578 | 1.30E-24 | HTC  | GLUL     |
| MGST3.1    | 2.14E-28 | -0.26817441 | 0.802 | 0.815 | 5.40E-24 | HTC  | MGST3    |
| MGP        | 6.27E-27 | 0.271334609 | 1     | 1     | 1.58E-22 | HTC  | MGP      |
| NEAT1      | 1.25E-26 | -0.27695192 | 0.997 | 0.996 | 3.14E-22 | HTC  | NEAT1    |
| S100A10.1  | 4.91E-25 | -0.40310633 | 0.998 | 0.993 | 1.24E-20 | HTC  | S100A10  |
| SERPING1   | 1.64E-23 | -0.26180761 | 0.847 | 0.868 | 4.13E-19 | HTC  | SERPING1 |
| IGFBP5.1   | 3.84E-20 | -0.74760805 | 0.171 | 0.237 | 9.68E-16 | HTC  | IGFBP5   |
| RGS16.1    | 1.80E-19 | -0.70514002 | 0.72  | 0.745 | 4.54E-15 | HTC  | RGS16    |
| KLF6.1     | 3.44E-18 | -0.31702072 | 0.753 | 0.774 | 8.66E-14 | HTC  | KLF6     |
| PPP1R15A.1 | 3.02E-17 | -0.37056357 | 0.726 | 0.753 | 7.62E-13 | HTC  | PPP1R15A |
| ANXA1      | 9.05E-16 | -0.27257728 | 0.984 | 0.978 | 2.28E-11 | HTC  | ANXA1    |
| LUM.1      | 3.23E-11 | -0.25854736 | 1     | 0.999 | 8.13E-07 | HTC  | LUM      |
| PRSS23.1   | 4.77E-11 | -0.45654032 | 0.248 | 0.284 | 1.20E-06 | HTC  | PRSS23   |
| IER3.1     | 1.77E-10 | -0.30371982 | 0.842 | 0.875 | 4.47E-06 | HTC  | IER3     |
| MYL9       | 1.40E-09 | -0.37728888 | 0.262 | 0.306 | 3.52E-05 | HTC  | MYL9     |
| SLC25A37   | 6.45E-08 | -0.29825538 | 0.82  | 0.814 | 0.001626 | HTC  | SLC25A37 |
| KLF4.1     | 2.88E-07 | -0.28866663 | 0.849 | 0.845 | 0.007261 | HTC  | KLF4     |
| EMP1.1     | 0.000281 | -0.37891199 | 0.757 | 0.75  | 1        | HTC  | EMP1     |
| IGF2       | 0.001778 | -0.30338145 | 0.302 | 0.309 | 1        | HTC  | IGF2     |
| COL2A1.1   | 0        | 1.980322118 | 0.998 | 0.922 | 0        | RepC | COL2A1   |
| SPARC      | 0        | 1.518168463 | 0.999 | 0.972 | 0        | RepC | SPARC    |
| COL3A1.2   | 0        | 1.323830694 | 0.925 | 0.759 | 0        | RepC | COL3A1   |
| CILP2.1    | 0        | 1.322037114 | 0.963 | 0.735 | 0        | RepC | CILP2    |
| CLEC3A.2   | 0        | 1.186124923 | 0.945 | 0.719 | 0        | RepC | CLEC3A   |
| CTHRC1.1   | 0        | 1.183230468 | 0.851 | 0.506 | 0        | RepC | CTHRC1   |
| MATN3.2    | 0        | 1.043841963 | 0.857 | 0.511 | 0        | RepC | MATN3    |

|            |           |             |       |       |           |      |          |
|------------|-----------|-------------|-------|-------|-----------|------|----------|
| COL9A2.1   | 0         | 1.013479829 | 0.956 | 0.654 | 0         | RepC | COL9A2   |
| COL11A1    | 0         | 0.896613135 | 0.962 | 0.779 | 0         | RepC | COL11A1  |
| COL9A3.1   | 0         | 0.860550131 | 0.997 | 0.885 | 0         | RepC | COL9A3   |
| COL9A1.2   | 0         | 0.819489844 | 0.49  | 0.205 | 0         | RepC | COL9A1   |
| SMOC2.2    | 0         | 0.750331692 | 0.992 | 0.892 | 0         | RepC | SMOC2    |
| ITM2A.1    | 0         | 0.714031807 | 0.93  | 0.663 | 0         | RepC | ITM2A    |
| COL11A2.1  | 0         | 0.675861214 | 0.958 | 0.718 | 0         | RepC | COL11A2  |
| COL5A2.2   | 0         | 0.655410806 | 0.865 | 0.627 | 0         | RepC | COL5A2   |
| SERPINA5.2 | 0         | 0.57580661  | 0.986 | 0.824 | 0         | RepC | SERPINA5 |
| FMOD       | 0         | 0.565687902 | 1     | 0.993 | 0         | RepC | FMOD     |
| SDC1.1     | 0         | 0.435278526 | 0.552 | 0.242 | 0         | RepC | SDC1     |
| COMP.2     | 6.99E-308 | 0.759419814 | 1     | 0.999 | 1.76E-303 | RepC | COMP     |
| INSC       | 3.81E-287 | 0.276791213 | 0.381 | 0.131 | 9.59E-283 | RepC | INSC     |
| IGF2.1     | 5.06E-255 | 0.748465006 | 0.549 | 0.271 | 1.27E-250 | RepC | IGF2     |
| PPIC.1     | 6.42E-253 | 0.541324954 | 0.884 | 0.72  | 1.62E-248 | RepC | PPIC     |
| SBSPON.1   | 3.20E-248 | 0.493677664 | 0.726 | 0.425 | 8.07E-244 | RepC | SBSPON   |
| PCOLCE2.1  | 1.49E-242 | 0.469442876 | 0.998 | 0.971 | 3.75E-238 | RepC | PCOLCE2  |
| OGN.2      | 2.27E-241 | 0.834451311 | 0.94  | 0.794 | 5.72E-237 | RepC | OGN      |
| FIBIN.1    | 2.53E-234 | 0.632577091 | 0.96  | 0.825 | 6.38E-230 | RepC | FIBIN    |
| TNNT3.1    | 8.38E-230 | 0.686384938 | 0.571 | 0.301 | 2.11E-225 | RepC | TNNT3    |
| CHAD.2     | 1.93E-224 | 0.443203426 | 0.993 | 0.849 | 4.87E-220 | RepC | CHAD     |
| S100A1.1   | 2.04E-224 | 0.449662131 | 0.996 | 0.88  | 5.15E-220 | RepC | S100A1   |
| IFITM3.2   | 2.36E-218 | -0.70198094 | 0.952 | 0.975 | 5.95E-214 | RepC | IFITM3   |
| P4HB       | 4.35E-216 | 0.393497213 | 0.996 | 0.97  | 1.10E-211 | RepC | P4HB     |
| LOXL3.1    | 4.44E-216 | 0.384121344 | 0.583 | 0.323 | 1.12E-211 | RepC | LOXL3    |
| BGN.1      | 6.40E-204 | 0.340740486 | 1     | 0.999 | 1.61E-199 | RepC | BGN      |
| P4HA2      | 7.14E-198 | 0.429298736 | 0.841 | 0.636 | 1.80E-193 | RepC | P4HA2    |
| COL5A1.2   | 2.73E-197 | 0.482859101 | 0.736 | 0.499 | 6.89E-193 | RepC | COL5A1   |
| LOXL2.1    | 6.13E-196 | 0.382953486 | 0.471 | 0.236 | 1.54E-191 | RepC | LOXL2    |
| IFITM2.2   | 1.37E-192 | -0.72815313 | 0.76  | 0.843 | 3.45E-188 | RepC | IFITM2   |
| NRN1.1     | 2.27E-192 | 0.470838963 | 0.949 | 0.851 | 5.72E-188 | RepC | NRN1     |
| SCRG1.2    | 7.99E-186 | 0.40986889  | 1     | 0.993 | 2.01E-181 | RepC | SCRG1    |
| PAPSS2     | 6.38E-184 | 0.415735438 | 0.914 | 0.765 | 1.61E-179 | RepC | PAPSS2   |
| TSPAN2.1   | 4.17E-182 | 0.522391578 | 0.873 | 0.688 | 1.05E-177 | RepC | TSPAN2   |
| HAPLN1.1   | 3.62E-179 | 0.512633341 | 0.999 | 0.943 | 9.13E-175 | RepC | HAPLN1   |
| CYTL1.2    | 2.76E-174 | 0.508496229 | 0.981 | 0.883 | 6.94E-170 | RepC | CYTL1    |
| UGP2.2     | 1.75E-172 | 0.425098837 | 0.957 | 0.862 | 4.41E-168 | RepC | UGP2     |
| DOK1       | 2.16E-172 | 0.367487504 | 0.601 | 0.362 | 5.44E-168 | RepC | DOK1     |
| MFGE8.2    | 3.46E-166 | -0.61566785 | 0.937 | 0.946 | 8.72E-162 | RepC | MFGE8    |
| CST3.2     | 4.15E-162 | -0.41272599 | 0.997 | 0.997 | 1.05E-157 | RepC | CST3     |
| C2orf82.2  | 2.27E-156 | 0.300861185 | 0.999 | 0.94  | 5.73E-152 | RepC | C2orf82  |
| CILP.1     | 4.63E-156 | 0.485777113 | 0.973 | 0.902 | 1.17E-151 | RepC | CILP     |
| GAPDH.1    | 2.19E-155 | 0.299104032 | 1     | 1     | 5.52E-151 | RepC | GAPDH    |
| LSP1.1     | 1.30E-153 | 0.387622125 | 0.973 | 0.878 | 3.28E-149 | RepC | LSP1     |
| FAM162A    | 1.57E-152 | 0.37148937  | 0.96  | 0.862 | 3.94E-148 | RepC | FAM162A  |
| IFITM10    | 4.69E-150 | 0.327838479 | 0.711 | 0.468 | 1.18E-145 | RepC | IFITM10  |
| GREM1.2    | 5.95E-150 | 0.81591491  | 0.428 | 0.232 | 1.50E-145 | RepC | GREM1    |
| FKBP10     | 7.14E-150 | 0.34634324  | 0.957 | 0.851 | 1.80E-145 | RepC | FKBP10   |
| TRPV4.1    | 6.77E-149 | 0.382296504 | 0.885 | 0.676 | 1.71E-144 | RepC | TRPV4    |
| ANGPTL5    | 6.87E-149 | 0.297353495 | 0.571 | 0.339 | 1.73E-144 | RepC | ANGPTL5  |
| SRPX2.1    | 2.93E-147 | 0.458511218 | 0.745 | 0.548 | 7.39E-143 | RepC | SRPX2    |
| ITIH6      | 1.26E-146 | 0.255273425 | 0.617 | 0.37  | 3.18E-142 | RepC | ITIH6    |
| P4HA1      | 1.93E-144 | 0.334737695 | 0.943 | 0.812 | 4.85E-140 | RepC | P4HA1    |
| TUBB2B.1   | 2.62E-142 | 0.390854716 | 0.844 | 0.596 | 6.60E-138 | RepC | TUBB2B   |
| MT-ND3.1   | 1.17E-141 | -0.50884218 | 0.895 | 0.942 | 2.95E-137 | RepC | MT-ND3   |
| CDA        | 1.59E-139 | 0.263275222 | 0.554 | 0.327 | 4.01E-135 | RepC | CDA      |
| GALNT18.1  | 5.14E-139 | 0.308158575 | 0.76  | 0.541 | 1.29E-134 | RepC | GALNT18  |
| LECT1.2    | 8.61E-139 | 0.406661121 | 0.691 | 0.447 | 2.17E-134 | RepC | LECT1    |
| SDC2.1     | 8.88E-139 | 0.276866958 | 0.994 | 0.954 | 2.24E-134 | RepC | SDC2     |
| XYLT1      | 2.79E-135 | 0.269359208 | 0.557 | 0.337 | 7.04E-131 | RepC | XYLT1    |

|            |           |             |       |       |           |      |          |
|------------|-----------|-------------|-------|-------|-----------|------|----------|
| S100A13.1  | 4.25E-133 | 0.289640336 | 0.996 | 0.974 | 1.07E-128 | RepC | S100A13  |
| IGFBP7     | 2.15E-131 | 0.340378206 | 0.768 | 0.564 | 5.42E-127 | RepC | IGFBP7   |
| H3F3B.1    | 8.13E-130 | -0.34138634 | 0.999 | 1     | 2.05E-125 | RepC | H3F3B    |
| GDF10.1    | 6.73E-127 | 0.457443821 | 0.829 | 0.61  | 1.69E-122 | RepC | GDF10    |
| MT-CYB.1   | 2.44E-126 | -0.48102869 | 0.912 | 0.952 | 6.14E-122 | RepC | MT-CYB   |
| SEMA3E     | 4.51E-121 | 0.263684231 | 0.56  | 0.349 | 1.14E-116 | RepC | SEMA3E   |
| SSR2       | 4.44E-120 | 0.270316849 | 0.966 | 0.899 | 1.12E-115 | RepC | SSR2     |
| EPS8L2     | 4.59E-120 | 0.314839413 | 0.737 | 0.542 | 1.16E-115 | RepC | EPS8L2   |
| MT-CO3.2   | 2.26E-117 | -0.48290632 | 0.921 | 0.956 | 5.70E-113 | RepC | MT-CO3   |
| MT-ND4.2   | 2.71E-116 | -0.39463733 | 0.922 | 0.959 | 6.82E-112 | RepC | MT-ND4   |
| OSTC.2     | 5.96E-115 | 0.295425168 | 0.924 | 0.832 | 1.50E-110 | RepC | OSTC     |
| TIMP3.1    | 4.51E-113 | -0.90738673 | 0.455 | 0.575 | 1.14E-108 | RepC | TIMP3    |
| FBXO2.2    | 1.67E-111 | 0.272966097 | 0.969 | 0.855 | 4.22E-107 | RepC | FBXO2    |
| HCFC1R1.1  | 3.50E-106 | 0.277498007 | 0.791 | 0.611 | 8.82E-102 | RepC | HCFC1R1  |
| OMD        | 6.82E-103 | 0.469768025 | 0.787 | 0.64  | 1.72E-98  | RepC | OMD      |
| MT-ND2.1   | 1.37E-102 | -0.39151423 | 0.918 | 0.955 | 3.46E-98  | RepC | MT-ND2   |
| GAS1.2     | 2.92E-102 | 0.336672857 | 0.595 | 0.399 | 7.37E-98  | RepC | GAS1     |
| PTMA       | 1.13E-101 | -0.28648242 | 0.997 | 1     | 2.84E-97  | RepC | PTMA     |
| EFEMP2     | 5.77E-100 | 0.258378598 | 0.863 | 0.697 | 1.45E-95  | RepC | EFEMP2   |
| MAGED1     | 1.21E-98  | 0.261851073 | 0.793 | 0.616 | 3.04E-94  | RepC | MAGED1   |
| SLC25A37.1 | 6.23E-98  | -0.53077982 | 0.777 | 0.82  | 1.57E-93  | RepC | SLC25A37 |
| ADIRF      | 1.72E-95  | -0.58012215 | 0.906 | 0.925 | 4.34E-91  | RepC | ADIRF    |
| THBS4.1    | 5.66E-94  | 0.259153758 | 0.309 | 0.163 | 1.43E-89  | RepC | THBS4    |
| NFATC2.1   | 1.00E-93  | 0.408343155 | 0.69  | 0.53  | 2.52E-89  | RepC | NFATC2   |
| PLXDC2.1   | 1.04E-93  | 0.260268965 | 0.927 | 0.82  | 2.63E-89  | RepC | PLXDC2   |
| MALAT1     | 1.09E-90  | -0.31697614 | 1     | 1     | 2.75E-86  | RepC | MALAT1   |
| CD44.1     | 1.17E-89  | -0.43328474 | 0.627 | 0.698 | 2.94E-85  | RepC | CD44     |
| MT2A.1     | 3.70E-89  | -0.49001002 | 0.997 | 0.999 | 9.31E-85  | RepC | MT2A     |
| MT-CO2.2   | 1.74E-88  | -0.42421596 | 0.918 | 0.954 | 4.38E-84  | RepC | MT-CO2   |
| NTRK2.1    | 2.72E-87  | 0.251118275 | 0.574 | 0.391 | 6.86E-83  | RepC | NTRK2    |
| RARRES2.2  | 4.49E-87  | 0.310925733 | 0.528 | 0.339 | 1.13E-82  | RepC | RARRES2  |
| AQP3       | 2.73E-86  | 0.551748113 | 0.499 | 0.338 | 6.88E-82  | RepC | AQP3     |
| CHI3L1.2   | 2.77E-85  | -1.73797041 | 0.759 | 0.792 | 6.99E-81  | RepC | CHI3L1   |
| NGF.1      | 4.58E-84  | 0.274998136 | 0.368 | 0.215 | 1.15E-79  | RepC | NGF      |
| PID1.1     | 5.20E-84  | 0.282401408 | 0.784 | 0.633 | 1.31E-79  | RepC | PID1     |
| VCAM1.2    | 8.50E-84  | -0.80668384 | 0.062 | 0.194 | 2.14E-79  | RepC | VCAM1    |
| TIMP1.1    | 2.89E-81  | -0.66063129 | 0.998 | 0.995 | 7.28E-77  | RepC | TIMP1    |
| ATP1B1.1   | 4.67E-81  | 0.264611563 | 0.784 | 0.616 | 1.18E-76  | RepC | ATP1B1   |
| NEAT1.1    | 1.99E-80  | -0.38131387 | 0.996 | 0.996 | 5.01E-76  | RepC | NEAT1    |
| CTGF.1     | 5.62E-79  | 0.304614231 | 0.992 | 0.98  | 1.42E-74  | RepC | CTGF     |
| JUNB.2     | 1.23E-77  | -0.6980873  | 0.994 | 0.994 | 3.09E-73  | RepC | JUNB     |
| PCOLCE.2   | 2.35E-76  | 0.256635965 | 0.928 | 0.816 | 5.93E-72  | RepC | PCOLCE   |
| MT-ATP6.1  | 2.52E-76  | -0.37991651 | 0.921 | 0.954 | 6.35E-72  | RepC | MT-ATP6  |
| CKB        | 1.91E-75  | 0.401955489 | 0.499 | 0.341 | 4.81E-71  | RepC | CKB      |
| IGFBP6.2   | 7.22E-75  | -0.82552358 | 0.653 | 0.709 | 1.82E-70  | RepC | IGFBP6   |
| ID2        | 3.01E-71  | 0.28124514  | 0.967 | 0.914 | 7.58E-67  | RepC | ID2      |
| UROC1      | 5.17E-69  | 0.296090384 | 0.337 | 0.206 | 1.30E-64  | RepC | UROC1    |
| B2M        | 1.05E-68  | -0.26261981 | 0.999 | 1     | 2.65E-64  | RepC | B2M      |
| MT-ND5.1   | 8.74E-67  | -0.31626287 | 0.899 | 0.939 | 2.20E-62  | RepC | MT-ND5   |
| IER2.2     | 2.23E-65  | -0.78862318 | 0.87  | 0.87  | 5.62E-61  | RepC | IER2     |
| CDKN1A.1   | 4.95E-64  | -0.40215262 | 0.811 | 0.841 | 1.25E-59  | RepC | CDKN1A   |
| HLA-E      | 1.60E-63  | -0.31912007 | 0.829 | 0.849 | 4.03E-59  | RepC | HLA-E    |
| CYR61.2    | 3.77E-62  | 0.283837261 | 0.975 | 0.936 | 9.51E-58  | RepC | CYR61    |
| NPC2.1     | 1.20E-61  | -0.37683687 | 0.953 | 0.948 | 3.01E-57  | RepC | NPC2     |
| MT-ND1     | 5.83E-61  | -0.31291986 | 0.9   | 0.946 | 1.47E-56  | RepC | MT-ND1   |
| YBX3       | 1.43E-60  | -0.30917983 | 0.621 | 0.675 | 3.59E-56  | RepC | YBX3     |
| COL10A1.2  | 2.41E-59  | -1.53156898 | 0.066 | 0.17  | 6.07E-55  | RepC | COL10A1  |
| KLF10.2    | 1.50E-58  | -0.44972307 | 0.536 | 0.605 | 3.77E-54  | RepC | KLF10    |
| MT-CO1.2   | 2.74E-57  | -0.33203758 | 0.917 | 0.952 | 6.90E-53  | RepC | MT-CO1   |
| RCAN1.1    | 1.49E-56  | 0.425163925 | 0.782 | 0.664 | 3.76E-52  | RepC | RCAN1    |

|             |          |             |       |       |          |      |           |
|-------------|----------|-------------|-------|-------|----------|------|-----------|
| NBL1.2      | 3.26E-56 | -0.40438991 | 0.077 | 0.179 | 8.21E-52 | RepC | NBL1      |
| TMEM173     | 5.29E-55 | -0.26375332 | 0.292 | 0.404 | 1.33E-50 | RepC | TMEM173   |
| BTG1.1      | 8.32E-55 | -0.4323368  | 0.925 | 0.932 | 2.10E-50 | RepC | BTG1      |
| EPS8.1      | 9.34E-54 | -0.28712795 | 0.542 | 0.606 | 2.35E-49 | RepC | EPS8      |
| PPP1R15A.2  | 5.14E-52 | -0.48453291 | 0.709 | 0.756 | 1.29E-47 | RepC | PPP1R15A  |
| NDRG1       | 1.15E-49 | -0.30142011 | 0.62  | 0.661 | 2.89E-45 | RepC | NDRG1     |
| TIMP2.1     | 4.00E-49 | -0.37432638 | 0.712 | 0.731 | 1.01E-44 | RepC | TIMP2     |
| NRP2.1      | 4.36E-49 | -0.27893575 | 0.234 | 0.335 | 1.10E-44 | RepC | NRP2      |
| ACTB.2      | 5.35E-49 | -0.32314018 | 1     | 0.997 | 1.35E-44 | RepC | ACTB      |
| CCNL1.1     | 1.27E-48 | -0.32678818 | 0.866 | 0.876 | 3.20E-44 | RepC | CCNL1     |
| STEAP4.2    | 2.14E-48 | -0.33856535 | 0.032 | 0.112 | 5.38E-44 | RepC | STEAP4    |
| RHOC.1      | 8.40E-47 | -0.2510274  | 0.881 | 0.875 | 2.12E-42 | RepC | RHOC      |
| GPX1        | 4.72E-45 | -0.25759507 | 0.756 | 0.775 | 1.19E-40 | RepC | GPX1      |
| PLAUR.2     | 2.59E-44 | -0.35169186 | 0.258 | 0.345 | 6.53E-40 | RepC | PLAUR     |
| PPAP2B.2    | 4.69E-44 | -0.33728697 | 0.148 | 0.244 | 1.18E-39 | RepC | PPAP2B    |
| IER3.2      | 5.53E-44 | -0.63551363 | 0.849 | 0.873 | 1.39E-39 | RepC | IER3      |
| ZFP36.1     | 1.38E-43 | -0.5376201  | 0.958 | 0.956 | 3.47E-39 | RepC | ZFP36     |
| MT1M.1      | 1.98E-43 | -0.43557314 | 0.79  | 0.825 | 4.99E-39 | RepC | MT1M      |
| CEBPD       | 4.42E-43 | -0.27642638 | 0.308 | 0.401 | 1.11E-38 | RepC | CEBPD     |
| EGR1.2      | 9.47E-43 | -0.47911138 | 0.922 | 0.915 | 2.39E-38 | RepC | EGR1      |
| BZW1        | 1.44E-42 | -0.27755416 | 0.896 | 0.886 | 3.62E-38 | RepC | BZW1      |
| GLRX.2      | 2.76E-42 | -0.47188943 | 0.421 | 0.491 | 6.95E-38 | RepC | GLRX      |
| ECM1.2      | 2.33E-41 | -0.26192048 | 0.079 | 0.163 | 5.87E-37 | RepC | ECM1      |
| TREM1.2     | 3.87E-41 | -0.27754936 | 0.03  | 0.1   | 9.74E-37 | RepC | TREM1     |
| GLUL.1      | 5.60E-41 | -0.3805934  | 0.517 | 0.577 | 1.41E-36 | RepC | GLUL      |
| ARPC1B.1    | 7.91E-41 | -0.32723178 | 0.598 | 0.624 | 1.99E-36 | RepC | ARPC1B    |
| MINOS1      | 9.27E-41 | -0.26293284 | 0.795 | 0.786 | 2.34E-36 | RepC | MINOS1    |
| CD55.2      | 1.51E-40 | -0.93215556 | 0.698 | 0.726 | 3.82E-36 | RepC | CD55      |
| TMSB4X.2    | 1.77E-40 | -1.46578601 | 0.769 | 0.778 | 4.45E-36 | RepC | TMSB4X    |
| PLP2.1      | 2.29E-40 | -0.27022182 | 0.876 | 0.882 | 5.78E-36 | RepC | PLP2      |
| PIK3R1      | 7.60E-40 | -0.36525852 | 0.313 | 0.397 | 1.92E-35 | RepC | PIK3R1    |
| IRF1.1      | 2.45E-39 | -0.51934327 | 0.445 | 0.516 | 6.16E-35 | RepC | IRF1      |
| SOD3.1      | 1.61E-37 | -0.41939029 | 0.942 | 0.926 | 4.06E-33 | RepC | SOD3      |
| S100A11.2   | 2.04E-36 | -0.30433769 | 0.969 | 0.964 | 5.15E-32 | RepC | S100A11   |
| TXNIP       | 1.02E-34 | -0.37241412 | 0.443 | 0.509 | 2.57E-30 | RepC | TXNIP     |
| CYSTM1.1    | 1.54E-34 | -0.25561207 | 0.637 | 0.655 | 3.89E-30 | RepC | CYSTM1    |
| SOD2.1      | 4.07E-34 | -0.67462619 | 0.856 | 0.858 | 1.03E-29 | RepC | SOD2      |
| IBSP.2      | 4.97E-34 | -1.92625781 | 0.093 | 0.168 | 1.25E-29 | RepC | IBSP      |
| LMNA.1      | 9.16E-34 | -0.29922688 | 0.949 | 0.947 | 2.31E-29 | RepC | LMNA      |
| GBP2.1      | 1.05E-33 | -0.30306265 | 0.417 | 0.481 | 2.64E-29 | RepC | GBP2      |
| SOCS3.1     | 3.98E-32 | -0.47150118 | 0.804 | 0.81  | 1.00E-27 | RepC | SOCS3     |
| WDR74       | 4.95E-32 | -0.27012381 | 0.349 | 0.417 | 1.25E-27 | RepC | WDR74     |
| TNFRSF11B.2 | 4.94E-31 | 0.261468632 | 0.883 | 0.784 | 1.24E-26 | RepC | TNFRSF11B |
| IGFBP5.2    | 6.99E-31 | -0.89104227 | 0.163 | 0.238 | 1.76E-26 | RepC | IGFBP5    |
| A2M.1       | 1.13E-30 | -0.32554283 | 0.348 | 0.419 | 2.86E-26 | RepC | A2M       |
| SAA1.1      | 7.68E-29 | -0.82878571 | 0.043 | 0.102 | 1.93E-24 | RepC | SAA1      |
| SCARA3.1    | 2.38E-28 | -0.28501758 | 0.57  | 0.589 | 6.01E-24 | RepC | SCARA3    |
| SLPI.1      | 2.99E-28 | -0.29122237 | 0.155 | 0.236 | 7.54E-24 | RepC | SLPI      |
| SERPING1.1  | 4.12E-28 | -0.27120643 | 0.867 | 0.865 | 1.04E-23 | RepC | SERPING1  |
| SLC39A14.2  | 4.96E-28 | -0.2851852  | 0.744 | 0.749 | 1.25E-23 | RepC | SLC39A14  |
| AQP1.2      | 5.28E-28 | -0.48472396 | 0.055 | 0.114 | 1.33E-23 | RepC | AQP1      |
| ICAM1.2     | 6.73E-28 | -0.49851901 | 0.474 | 0.522 | 1.69E-23 | RepC | ICAM1     |
| OSMR.1      | 2.14E-27 | -0.28082285 | 0.577 | 0.6   | 5.39E-23 | RepC | OSMR      |
| RBP4.2      | 1.21E-25 | -0.26886068 | 0.681 | 0.71  | 3.06E-21 | RepC | RBP4      |
| ZFP36L1     | 4.15E-25 | -0.25423883 | 0.777 | 0.778 | 1.05E-20 | RepC | ZFP36L1   |
| TAC1        | 4.85E-25 | 0.255647004 | 0.108 | 0.061 | 1.22E-20 | RepC | TAC1      |
| C1R.2       | 1.28E-24 | -0.36287429 | 0.674 | 0.674 | 3.21E-20 | RepC | C1R       |
| PFN1.1      | 8.81E-24 | -0.27015045 | 0.902 | 0.885 | 2.22E-19 | RepC | PFN1      |
| C10orf10    | 9.96E-24 | -0.32603427 | 0.191 | 0.259 | 2.51E-19 | RepC | C10orf10  |
| CP.1        | 1.07E-23 | -0.4169289  | 0.607 | 0.604 | 2.70E-19 | RepC | CP        |



|            |           |             |       |       |           |      |          |
|------------|-----------|-------------|-------|-------|-----------|------|----------|
| CAPZB.2    | 2.70E-23  | -0.26515432 | 0.648 | 0.64  | 6.80E-19  | RepC | CAPZB    |
| TAGLN2.2   | 1.07E-22  | -0.32483325 | 0.796 | 0.793 | 2.69E-18  | RepC | TAGLN2   |
| DPT.2      | 1.25E-22  | -0.28613484 | 0.478 | 0.354 | 3.14E-18  | RepC | DPT      |
| BTG2.2     | 6.44E-22  | -0.44574997 | 0.718 | 0.73  | 1.62E-17  | RepC | BTG2     |
| GPX3.2     | 3.07E-21  | -0.41012559 | 0.992 | 0.989 | 7.73E-17  | RepC | GPX3     |
| NFKBIZ.1   | 6.60E-21  | -0.3800897  | 0.498 | 0.521 | 1.66E-16  | RepC | NFKBIZ   |
| NFKBIA.2   | 1.54E-20  | -0.61138839 | 0.886 | 0.882 | 3.89E-16  | RepC | NFKBIA   |
| GADD45B.2  | 8.57E-19  | -0.56740561 | 0.928 | 0.919 | 2.16E-14  | RepC | GADD45B  |
| TNFAIP6.2  | 2.96E-18  | -0.86085717 | 0.155 | 0.209 | 7.45E-14  | RepC | TNFAIP6  |
| CRYAB.1    | 3.54E-18  | -0.42213851 | 0.857 | 0.818 | 8.91E-14  | RepC | CRYAB    |
| COL1A1.2   | 5.16E-18  | -1.44492409 | 0.094 | 0.143 | 1.30E-13  | RepC | COL1A1   |
| CLU.2      | 6.63E-18  | -0.42178515 | 1     | 1     | 1.67E-13  | RepC | CLU      |
| HES1.2     | 9.32E-18  | -0.41117067 | 0.473 | 0.506 | 2.35E-13  | RepC | HES1     |
| RAMP1.1    | 3.50E-17  | -0.25960217 | 0.219 | 0.273 | 8.82E-13  | RepC | RAMP1    |
| NR4A1.2    | 4.26E-16  | -0.39503128 | 0.586 | 0.594 | 1.07E-11  | RepC | NR4A1    |
| CD74       | 7.29E-16  | -0.33510537 | 0.11  | 0.159 | 1.84E-11  | RepC | CD74     |
| PIM1.1     | 3.54E-15  | -0.26097677 | 0.288 | 0.33  | 8.91E-11  | RepC | PIM1     |
| CCDC80     | 3.83E-15  | -0.34577859 | 0.901 | 0.862 | 9.64E-11  | RepC | CCDC80   |
| BHLHE40.2  | 4.24E-14  | -0.27165349 | 0.803 | 0.797 | 1.07E-09  | RepC | BHLHE40  |
| CALD1.1    | 6.89E-14  | -0.29755222 | 0.808 | 0.78  | 1.73E-09  | RepC | CALD1    |
| CHI3L2.2   | 1.85E-12  | -1.37361233 | 0.932 | 0.875 | 4.67E-08  | RepC | CHI3L2   |
| CRLF1.2    | 3.49E-12  | -0.46003665 | 0.216 | 0.249 | 8.79E-08  | RepC | CRLF1    |
| TAGLN.1    | 5.10E-12  | -0.81232789 | 0.18  | 0.22  | 1.28E-07  | RepC | TAGLN    |
| RGS16.2    | 5.34E-12  | -0.66704831 | 0.75  | 0.741 | 1.35E-07  | RepC | RGS16    |
| FN1.2      | 1.75E-11  | -0.54071436 | 1     | 0.999 | 4.41E-07  | RepC | FN1      |
| GEM.1      | 2.30E-11  | -0.37182334 | 0.83  | 0.794 | 5.80E-07  | RepC | GEM      |
| PHLDA2.1   | 5.60E-11  | -0.28948793 | 0.57  | 0.575 | 1.41E-06  | RepC | PHLDA2   |
| ATF3.2     | 1.69E-10  | -0.32616866 | 0.589 | 0.587 | 4.26E-06  | RepC | ATF3     |
| HSPA6      | 3.53E-10  | 0.435272733 | 0.119 | 0.086 | 8.90E-06  | RepC | HSPA6    |
| RASD1.2    | 2.63E-09  | -0.57880849 | 0.663 | 0.637 | 6.63E-05  | RepC | RASD1    |
| SPP1.2     | 4.94E-09  | -2.03227445 | 0.363 | 0.379 | 0.000124  | RepC | SPP1     |
| MT1A.1     | 3.75E-08  | -0.27292674 | 0.4   | 0.419 | 0.000945  | RepC | MT1A     |
| HSPA1B     | 3.79E-08  | 0.324882102 | 0.707 | 0.679 | 0.000956  | RepC | HSPA1B   |
| HTRA1.2    | 5.73E-08  | -1.11696988 | 0.87  | 0.817 | 0.001444  | RepC | HTRA1    |
| MMP3.2     | 2.75E-07  | -0.97827769 | 0.568 | 0.558 | 0.006939  | RepC | MMP3     |
| RND1.1     | 2.78E-07  | -0.26687733 | 0.181 | 0.211 | 0.007005  | RepC | RND1     |
| S100A4.2   | 9.59E-07  | -0.47240142 | 0.677 | 0.607 | 0.02415   | RepC | S100A4   |
| HSPA1A     | 1.42E-06  | 0.35331756  | 0.817 | 0.79  | 0.035795  | RepC | HSPA1A   |
| PRG4.2     | 5.18E-06  | -0.84757712 | 0.427 | 0.38  | 0.130461  | RepC | PRG4     |
| FOSB.1     | 4.88E-05  | -0.31340427 | 0.869 | 0.85  | 1         | RepC | FOSB     |
| ISLR.2     | 6.91E-05  | -0.2789714  | 0.808 | 0.746 | 1         | RepC | ISLR     |
| APOD.1     | 0.000803  | -0.65140792 | 0.838 | 0.749 | 1         | RepC | APOD     |
| TMSB10     | 0.001047  | -0.41959102 | 0.823 | 0.78  | 1         | RepC | TMSB10   |
| TGFBI.2    | 0.001979  | -0.68754617 | 0.408 | 0.385 | 1         | RepC | TGFBI    |
| THY1.2     | 0.002091  | -0.38421602 | 0.229 | 0.231 | 1         | RepC | THY1     |
| CHI3L1.3   | 0         | 1.764969322 | 0.95  | 0.771 | 0         | RegC | CHI3L1   |
| CHI3L2.3   | 0         | 1.430762347 | 0.973 | 0.873 | 0         | RegC | CHI3L2   |
| SERF2.1    | 0         | -0.54170302 | 0.994 | 0.999 | 0         | RegC | SERF2    |
| SCRG1.3    | 0         | -1.26253341 | 0.995 | 0.994 | 0         | RegC | SCRG1    |
| SPARC.1    | 0         | -1.70436827 | 0.905 | 0.983 | 0         | RegC | SPARC    |
| NNMT.2     | 7.94E-308 | 0.771795483 | 0.995 | 0.958 | 2.00E-303 | RegC | NNMT     |
| VKORC1.1   | 6.64E-298 | -0.6606459  | 0.882 | 0.973 | 1.67E-293 | RegC | VKORC1   |
| IFITM3.3   | 3.44E-290 | 0.612316532 | 0.99  | 0.97  | 8.68E-286 | RegC | IFITM3   |
| SSR4.1     | 8.66E-288 | -0.67739663 | 0.898 | 0.977 | 2.18E-283 | RegC | SSR4     |
| NUCB2.1    | 4.15E-284 | -0.7090351  | 0.737 | 0.924 | 1.05E-279 | RegC | NUCB2    |
| TSPO.1     | 5.45E-280 | -0.64072091 | 0.847 | 0.963 | 1.37E-275 | RegC | TSPO     |
| SERPINA5.3 | 2.72E-279 | -1.02905222 | 0.671 | 0.864 | 6.86E-275 | RegC | SERPINA5 |
| IFITM2.3   | 5.57E-276 | 0.743407498 | 0.93  | 0.822 | 1.40E-271 | RegC | IFITM2   |
| SLC25A37.2 | 4.14E-261 | 0.96396428  | 0.895 | 0.806 | 1.04E-256 | RegC | SLC25A37 |
| CLEC3A.3   | 4.10E-260 | -2.03579484 | 0.533 | 0.772 | 1.03E-255 | RegC | CLEC3A   |

|            |           |             |       |       |           |      |          |
|------------|-----------|-------------|-------|-------|-----------|------|----------|
| FGFBP2.1   | 9.45E-257 | -1.63544744 | 0.937 | 0.963 | 2.38E-252 | RegC | FGFBP2   |
| S100A1.2   | 9.90E-256 | -0.9728759  | 0.846 | 0.9   | 2.50E-251 | RegC | S100A1   |
| CHAD.3     | 3.19E-255 | -1.26672463 | 0.762 | 0.879 | 8.03E-251 | RegC | CHAD     |
| C2orf82.3  | 1.34E-250 | -1.3490344  | 0.953 | 0.947 | 3.37E-246 | RegC | C2orf82  |
| PCOLCE2.2  | 3.81E-245 | -0.68247293 | 0.94  | 0.978 | 9.61E-241 | RegC | PCOLCE2  |
| COL9A2.2   | 3.99E-243 | -0.99130039 | 0.421 | 0.723 | 1.01E-238 | RegC | COL9A2   |
| CLU.3      | 5.48E-240 | 0.589191006 | 1     | 1     | 1.38E-235 | RegC | CLU      |
| FXYD1.2    | 1.70E-236 | -0.8712711  | 0.476 | 0.774 | 4.30E-232 | RegC | FXYD1    |
| MIA.1      | 6.47E-232 | -0.84085435 | 0.955 | 0.961 | 1.63E-227 | RegC | MIA      |
| CRISPLD1.2 | 1.10E-228 | -1.50622596 | 0.2   | 0.541 | 2.76E-224 | RegC | CRISPLD1 |
| PRDX4.1    | 3.18E-222 | -0.59937755 | 0.784 | 0.936 | 8.01E-218 | RegC | PRDX4    |
| CYTL1.3    | 8.05E-222 | -1.88253401 | 0.799 | 0.906 | 2.03E-217 | RegC | CYTL1    |
| LECT1.3    | 6.29E-211 | -1.26915683 | 0.194 | 0.509 | 1.59E-206 | RegC | LECT1    |
| CD99.1     | 2.83E-207 | -0.54054228 | 0.923 | 0.979 | 7.14E-203 | RegC | CD99     |
| IGFBP7.1   | 1.00E-206 | -1.1493481  | 0.324 | 0.619 | 2.53E-202 | RegC | IGFBP7   |
| MALAT1.1   | 2.61E-197 | 0.48506223  | 1     | 1     | 6.56E-193 | RegC | MALAT1   |
| S100A13.2  | 2.92E-191 | -0.51392013 | 0.946 | 0.98  | 7.36E-187 | RegC | S100A13  |
| FXYD6.1    | 4.32E-185 | -0.58665599 | 0.719 | 0.891 | 1.09E-180 | RegC | FXYD6    |
| PLD3.1     | 1.40E-183 | -0.5015416  | 0.737 | 0.911 | 3.54E-179 | RegC | PLD3     |
| BTG1.2     | 4.65E-182 | 0.768049648 | 0.952 | 0.929 | 1.17E-177 | RegC | BTG1     |
| RPL13.1    | 2.28E-178 | 0.282241205 | 1     | 1     | 5.74E-174 | RegC | RPL13    |
| RPS6.1     | 2.75E-175 | 0.255889083 | 1     | 1     | 6.92E-171 | RegC | RPS6     |
| SPINT2.2   | 7.32E-175 | -0.66948123 | 0.849 | 0.91  | 1.84E-170 | RegC | SPINT2   |
| FMOD.1     | 5.11E-174 | -0.50169363 | 0.991 | 0.994 | 1.29E-169 | RegC | FMOD     |
| RPL15.1    | 2.65E-171 | 0.267181078 | 1     | 1     | 6.67E-167 | RegC | RPL15    |
| TMED10.1   | 4.37E-169 | -0.46105756 | 0.793 | 0.928 | 1.10E-164 | RegC | TMED10   |
| PDPN.1     | 1.67E-167 | -0.97948431 | 0.582 | 0.788 | 4.20E-163 | RegC | PDPN     |
| KDEL3.1    | 6.38E-167 | -0.48852721 | 0.338 | 0.637 | 1.61E-162 | RegC | KDEL3    |
| ITM2B.2    | 2.46E-164 | -0.38895341 | 0.996 | 0.999 | 6.21E-160 | RegC | ITM2B    |
| PLAC9.1    | 2.00E-162 | -0.7783157  | 0.939 | 0.975 | 5.03E-158 | RegC | PLAC9    |
| ITM2A.2    | 2.31E-162 | -0.73442976 | 0.481 | 0.722 | 5.83E-158 | RegC | ITM2A    |
| TIMP1.2    | 4.60E-159 | -0.29412443 | 0.977 | 0.997 | 1.16E-154 | RegC | TIMP1    |
| CST3.3     | 1.82E-158 | -0.66303155 | 0.989 | 0.998 | 4.58E-154 | RegC | CST3     |
| RPL7.1     | 2.31E-155 | 0.274935004 | 1     | 1     | 5.81E-151 | RegC | RPL7     |
| OSMR.2     | 2.41E-155 | 0.612876834 | 0.723 | 0.584 | 6.06E-151 | RegC | OSMR     |
| PPIC.2     | 2.12E-153 | -0.60149347 | 0.549 | 0.763 | 5.35E-149 | RegC | PPIC     |
| GLIPR1.1   | 3.95E-153 | -0.51349215 | 0.394 | 0.675 | 9.96E-149 | RegC | GLIPR1   |
| COL2A1.2   | 1.99E-152 | -1.63440881 | 0.846 | 0.941 | 5.01E-148 | RegC | COL2A1   |
| CILP.2     | 3.19E-151 | -0.79644864 | 0.784 | 0.925 | 8.05E-147 | RegC | CILP     |
| EMP3.1     | 2.87E-147 | -0.57501125 | 0.814 | 0.938 | 7.24E-143 | RegC | EMP3     |
| MST4.2     | 4.41E-147 | -0.49844876 | 0.326 | 0.607 | 1.11E-142 | RegC | MST4     |
| IGFBP6.3   | 2.69E-146 | -1.02921581 | 0.484 | 0.725 | 6.77E-142 | RegC | IGFBP6   |
| SOD2.2     | 8.65E-146 | 1.050504902 | 0.883 | 0.855 | 2.18E-141 | RegC | SOD2     |
| TSPAN13.1  | 1.06E-142 | -0.56265331 | 0.112 | 0.371 | 2.66E-138 | RegC | TSPAN13  |
| FKBP10.1   | 2.70E-142 | -0.43454487 | 0.697 | 0.883 | 6.81E-138 | RegC | FKBP10   |
| COL5A2.3   | 1.31E-141 | -0.68880263 | 0.441 | 0.682 | 3.30E-137 | RegC | COL5A2   |
| STK38L.2   | 4.50E-141 | -0.55382033 | 0.452 | 0.705 | 1.14E-136 | RegC | STK38L   |
| MMP3.3     | 1.47E-140 | 1.703213473 | 0.687 | 0.545 | 3.71E-136 | RegC | MMP3     |
| RPL9       | 4.04E-140 | 0.251007767 | 1     | 1     | 1.02E-135 | RegC | RPL9     |
| COL11A2.2  | 7.09E-140 | -0.57892189 | 0.574 | 0.769 | 1.79E-135 | RegC | COL11A2  |
| TIMP3.2    | 1.78E-139 | -0.84472524 | 0.312 | 0.586 | 4.50E-135 | RegC | TIMP3    |
| PKM.1      | 2.67E-139 | -0.39525589 | 0.97  | 0.992 | 6.73E-135 | RegC | PKM      |
| TF.2       | 1.74E-138 | -1.51458419 | 0.311 | 0.556 | 4.38E-134 | RegC | TF       |
| TPM4.1     | 3.23E-138 | -0.54408024 | 0.412 | 0.677 | 8.15E-134 | RegC | TPM4     |
| NDUFA4L2   | 4.80E-138 | -0.31506589 | 1     | 0.998 | 1.21E-133 | RegC | NDUFA4L2 |
| GBP2.2     | 1.18E-136 | 0.578189624 | 0.63  | 0.456 | 2.98E-132 | RegC | GBP2     |
| PPIB       | 9.86E-135 | -0.39299825 | 0.906 | 0.969 | 2.49E-130 | RegC | PPIB     |
| MYL6       | 2.70E-134 | -0.42372506 | 0.958 | 0.989 | 6.79E-130 | RegC | MYL6     |
| INSIG1.2   | 4.55E-134 | -0.61843599 | 0.261 | 0.525 | 1.15E-129 | RegC | INSIG1   |
| RABAC1.1   | 1.96E-133 | -0.40388034 | 0.898 | 0.969 | 4.95E-129 | RegC | RABAC1   |

|             |           |             |       |       |           |      |           |
|-------------|-----------|-------------|-------|-------|-----------|------|-----------|
| CD63.2      | 2.77E-133 | -0.36499058 | 0.994 | 0.998 | 6.99E-129 | RegC | CD63      |
| EFEMP1.2    | 4.76E-129 | 0.512078577 | 0.721 | 0.556 | 1.20E-124 | RegC | EFEMP1    |
| TNFRSF11B.3 | 7.87E-129 | -1.0412316  | 0.616 | 0.816 | 1.98E-124 | RegC | TNFRSF11B |
| TMEM258     | 4.74E-127 | -0.33545037 | 0.9   | 0.973 | 1.20E-122 | RegC | TMEM258   |
| PHOSPHO1.1  | 1.54E-126 | -0.40007466 | 0.025 | 0.235 | 3.87E-122 | RegC | PHOSPHO1  |
| TMEM59.1    | 7.70E-126 | -0.35936909 | 0.961 | 0.986 | 1.94E-121 | RegC | TMEM59    |
| C1orf122    | 7.62E-124 | -0.37931099 | 0.464 | 0.718 | 1.92E-119 | RegC | C1orf122  |
| LTBP1.1     | 6.56E-122 | -0.38980146 | 0.166 | 0.417 | 1.65E-117 | RegC | LTBP1     |
| RPS2.1      | 1.13E-121 | 0.268511486 | 1     | 1     | 2.85E-117 | RegC | RPS2      |
| IVNS1ABP.1  | 1.90E-121 | -0.47601397 | 0.531 | 0.771 | 4.78E-117 | RegC | IVNS1ABP  |
| SAA1.2      | 1.93E-121 | 1.385109718 | 0.219 | 0.081 | 4.86E-117 | RegC | SAA1      |
| HNRNPA1.1   | 4.87E-121 | 0.322388612 | 1     | 0.997 | 1.23E-116 | RegC | HNRNPA1   |
| MT2A.2      | 6.51E-121 | 0.556475989 | 1     | 0.998 | 1.64E-116 | RegC | MT2A      |
| MFI2.1      | 7.04E-121 | -0.4039856  | 0.338 | 0.597 | 1.77E-116 | RegC | MFI2      |
| TMED3       | 3.02E-119 | -0.3618992  | 0.489 | 0.735 | 7.61E-115 | RegC | TMED3     |
| SH3BGRL3.1  | 4.80E-119 | -0.51327272 | 0.912 | 0.974 | 1.21E-114 | RegC | SH3BGRL3  |
| NTAN1.1     | 8.56E-119 | -0.35005681 | 0.177 | 0.428 | 2.16E-114 | RegC | NTAN1     |
| CHPF        | 2.29E-118 | -0.41257731 | 0.464 | 0.705 | 5.76E-114 | RegC | CHPF      |
| NGFRAP1.1   | 5.82E-116 | -0.40578537 | 0.777 | 0.914 | 1.47E-111 | RegC | NGFRAP1   |
| EXTL1.1     | 2.40E-115 | -0.2870461  | 0.046 | 0.257 | 6.06E-111 | RegC | EXTL1     |
| PYCR1       | 6.64E-115 | -0.33648957 | 0.28  | 0.543 | 1.67E-110 | RegC | PYCR1     |
| EIF1.1      | 5.92E-114 | 0.273589789 | 1     | 1     | 1.49E-109 | RegC | EIF1      |
| CHRDL2.2    | 1.70E-113 | -1.10461492 | 0.073 | 0.283 | 4.27E-109 | RegC | CHRDL2    |
| CRYAB.2     | 2.39E-113 | -0.61912045 | 0.635 | 0.843 | 6.01E-109 | RegC | CRYAB     |
| HSPB6.1     | 5.94E-113 | -0.33964647 | 0.198 | 0.452 | 1.50E-108 | RegC | HSPB6     |
| SERTAD4.1   | 7.04E-113 | -0.4014157  | 0.221 | 0.474 | 1.77E-108 | RegC | SERTAD4   |
| COL9A3.2    | 1.44E-112 | -0.65746745 | 0.863 | 0.903 | 3.62E-108 | RegC | COL9A3    |
| FCGRT.1     | 4.48E-112 | -0.40148443 | 0.61  | 0.817 | 1.13E-107 | RegC | FCGRT     |
| GSN.1       | 1.78E-111 | -0.40705603 | 0.851 | 0.944 | 4.48E-107 | RegC | GSN       |
| COL11A1.1   | 2.53E-111 | -0.58003145 | 0.661 | 0.819 | 6.38E-107 | RegC | COL11A1   |
| MDFI.2      | 5.08E-111 | -0.5422639  | 0.53  | 0.725 | 1.28E-106 | RegC | MDFI      |
| C19orf10.1  | 1.40E-110 | -0.3773264  | 0.819 | 0.931 | 3.52E-106 | RegC | C19orf10  |
| CAPG.1      | 3.89E-110 | -0.39438491 | 0.382 | 0.636 | 9.80E-106 | RegC | CAPG      |
| DSTN        | 4.41E-110 | -0.32696191 | 0.982 | 0.994 | 1.11E-105 | RegC | DSTN      |
| PDIA6       | 5.45E-110 | -0.37573495 | 0.769 | 0.916 | 1.37E-105 | RegC | PDIA6     |
| RPN2.1      | 6.15E-110 | -0.38458515 | 0.659 | 0.848 | 1.55E-105 | RegC | RPN2      |
| STEAP4.3    | 1.31E-109 | 0.491398184 | 0.227 | 0.088 | 3.31E-105 | RegC | STEAP4    |
| AK1.2       | 1.85E-109 | -0.43294551 | 0.71  | 0.88  | 4.66E-105 | RegC | AK1       |
| FGFR1.1     | 4.24E-109 | -0.4739745  | 0.508 | 0.736 | 1.07E-104 | RegC | FGFR1     |
| P4HB.1      | 4.46E-109 | -0.36048433 | 0.916 | 0.979 | 1.12E-104 | RegC | P4HB      |
| PDIA3       | 5.18E-109 | -0.36781141 | 0.881 | 0.966 | 1.31E-104 | RegC | PDIA3     |
| HSP90B1     | 1.25E-108 | -0.36512124 | 0.909 | 0.978 | 3.14E-104 | RegC | HSP90B1   |
| TSPAN6.1    | 1.25E-108 | -0.4071776  | 0.534 | 0.744 | 3.15E-104 | RegC | TSPAN6    |
| TTC3        | 1.32E-107 | -0.35195648 | 0.639 | 0.84  | 3.33E-103 | RegC | TTC3      |
| WIF1.2      | 2.67E-107 | -0.54237938 | 0.063 | 0.264 | 6.72E-103 | RegC | WIF1      |
| S100A6.1    | 5.28E-107 | -0.54953154 | 0.998 | 1     | 1.33E-102 | RegC | S100A6    |
| HAPLN1.2    | 6.45E-107 | -0.72320183 | 0.945 | 0.951 | 1.63E-102 | RegC | HAPLN1    |
| BSG.1       | 2.93E-105 | -0.34261072 | 0.748 | 0.901 | 7.39E-101 | RegC | BSG       |
| WISP3       | 4.05E-105 | -0.38541747 | 0.439 | 0.67  | 1.02E-100 | RegC | WISP3     |
| LGALS1.1    | 7.15E-105 | -0.77005527 | 0.815 | 0.939 | 1.80E-100 | RegC | LGALS1    |
| CHID1.1     | 8.50E-105 | -0.3521251  | 0.481 | 0.718 | 2.14E-100 | RegC | CHID1     |
| DAP.1       | 2.10E-104 | -0.33891085 | 0.484 | 0.725 | 5.30E-100 | RegC | DAP       |
| LDLRAD4.2   | 1.58E-103 | -0.42334045 | 0.398 | 0.64  | 3.97E-99  | RegC | LDLRAD4   |
| MRPS6.1     | 5.50E-103 | -0.4411546  | 0.489 | 0.711 | 1.38E-98  | RegC | MRPS6     |
| CPE.1       | 7.05E-103 | -0.43532556 | 0.164 | 0.386 | 1.78E-98  | RegC | CPE       |
| LDLR.1      | 1.35E-102 | -0.37872584 | 0.185 | 0.419 | 3.41E-98  | RegC | LDLR      |
| MT1X.1      | 1.46E-102 | 0.610599997 | 0.995 | 0.993 | 3.68E-98  | RegC | MT1X      |
| CD9         | 3.40E-102 | -0.5057807  | 0.888 | 0.962 | 8.57E-98  | RegC | CD9       |
| C4BPA       | 1.55E-101 | 0.432283571 | 0.23  | 0.096 | 3.90E-97  | RegC | C4BPA     |
| P4HA2.1     | 6.60E-101 | -0.36574056 | 0.446 | 0.686 | 1.66E-96  | RegC | P4HA2     |

|            |           |             |       |       |          |      |          |
|------------|-----------|-------------|-------|-------|----------|------|----------|
| MSMO1.1    | 1.75E-100 | -0.42616633 | 0.176 | 0.405 | 4.41E-96 | RegC | MSMO1    |
| ACTG1.2    | 8.84E-99  | -0.50052523 | 0.989 | 0.995 | 2.23E-94 | RegC | ACTG1    |
| H1F0.1     | 1.45E-98  | -0.38891228 | 0.27  | 0.516 | 3.65E-94 | RegC | H1F0     |
| SERPINI1.1 | 1.38E-97  | -0.39818214 | 0.174 | 0.399 | 3.48E-93 | RegC | SERPINI1 |
| DKK1.2     | 5.00E-97  | -0.60152112 | 0.028 | 0.201 | 1.26E-92 | RegC | DKK1     |
| SLC29A1.1  | 1.60E-96  | -0.46416968 | 0.645 | 0.816 | 4.04E-92 | RegC | SLC29A1  |
| CD81       | 2.61E-95  | -0.35905175 | 0.361 | 0.604 | 6.58E-91 | RegC | CD81     |
| TTLL7.2    | 1.67E-94  | -0.32317527 | 0.182 | 0.407 | 4.21E-90 | RegC | TTLL7    |
| SLC26A4    | 1.67E-94  | 0.264323011 | 0.194 | 0.075 | 4.21E-90 | RegC | SLC26A4  |
| COL6A2.2   | 1.74E-94  | -0.66301553 | 0.756 | 0.902 | 4.38E-90 | RegC | COL6A2   |
| SPTSSB.1   | 2.43E-94  | -0.35438165 | 0.037 | 0.211 | 6.13E-90 | RegC | SPTSSB   |
| CKB.1      | 7.58E-94  | -0.39749391 | 0.163 | 0.383 | 1.91E-89 | RegC | CKB      |
| CNPY2.1    | 1.26E-93  | -0.33462461 | 0.673 | 0.844 | 3.16E-89 | RegC | CNPY2    |
| NDUFA1.1   | 2.69E-93  | -0.31265195 | 0.865 | 0.95  | 6.78E-89 | RegC | NDUFA1   |
| CDA.1      | 3.20E-93  | -0.32951861 | 0.162 | 0.378 | 8.05E-89 | RegC | CDA      |
| SDC2.2     | 3.55E-93  | -0.37367484 | 0.919 | 0.964 | 8.95E-89 | RegC | SDC2     |
| RAMP1.2    | 7.20E-93  | -0.47123184 | 0.09  | 0.285 | 1.81E-88 | RegC | RAMP1    |
| SGK1.1     | 1.13E-92  | -0.45693271 | 0.277 | 0.506 | 2.84E-88 | RegC | SGK1     |
| EFEMP2.1   | 4.07E-92  | -0.32598316 | 0.52  | 0.74  | 1.03E-87 | RegC | EFEMP2   |
| MAGED1.1   | 6.47E-92  | -0.30841787 | 0.421 | 0.663 | 1.63E-87 | RegC | MAGED1   |
| CD59.1     | 3.83E-91  | -0.36807045 | 0.875 | 0.951 | 9.66E-87 | RegC | CD59     |
| S100B.2    | 7.62E-91  | -0.5158649  | 0.941 | 0.93  | 1.92E-86 | RegC | S100B    |
| PCOLCE.3   | 1.64E-90  | -0.50304256 | 0.674 | 0.847 | 4.14E-86 | RegC | PCOLCE   |
| RARG       | 4.00E-90  | -0.3096773  | 0.369 | 0.606 | 1.01E-85 | RegC | RARG     |
| ZFAS1      | 1.27E-89  | 0.339366125 | 0.98  | 0.976 | 3.20E-85 | RegC | ZFAS1    |
| SRPX2.2    | 2.06E-89  | -0.40487877 | 0.368 | 0.597 | 5.18E-85 | RegC | SRPX2    |
| SNHG8.1    | 4.43E-89  | 0.41471331  | 0.944 | 0.928 | 1.12E-84 | RegC | SNHG8    |
| GDF10.2    | 9.44E-89  | -0.6202168  | 0.468 | 0.657 | 2.38E-84 | RegC | GDF10    |
| HMGCS1.1   | 1.79E-88  | -0.59285853 | 0.214 | 0.425 | 4.51E-84 | RegC | HMGCS1   |
| DUSP1.2    | 2.33E-88  | -0.52071634 | 0.614 | 0.793 | 5.88E-84 | RegC | DUSP1    |
| C2orf40.1  | 4.10E-88  | -0.86428206 | 1     | 0.999 | 1.03E-83 | RegC | C2orf40  |
| RCN3.1     | 4.84E-88  | -0.33556762 | 0.739 | 0.886 | 1.22E-83 | RegC | RCN3     |
| S100A4.3   | 4.84E-88  | -1.23532562 | 0.438 | 0.635 | 1.22E-83 | RegC | S100A4   |
| CTSF       | 5.34E-88  | -0.27771674 | 0.348 | 0.596 | 1.35E-83 | RegC | CTSF     |
| OST4       | 3.38E-87  | -0.26248666 | 0.958 | 0.986 | 8.52E-83 | RegC | OST4     |
| FKBP2.1    | 5.34E-87  | -0.3314726  | 0.678 | 0.856 | 1.35E-82 | RegC | FKBP2    |
| FXYD5.2    | 8.53E-87  | -0.3389205  | 0.856 | 0.954 | 2.15E-82 | RegC | FXYD5    |
| PLOD1      | 1.00E-86  | -0.29141206 | 0.352 | 0.584 | 2.52E-82 | RegC | PLOD1    |
| CTHRC1.2   | 2.22E-84  | -0.69691929 | 0.381 | 0.57  | 5.60E-80 | RegC | CTHRC1   |
| PFKP.1     | 3.48E-84  | -0.3350642  | 0.491 | 0.714 | 8.77E-80 | RegC | PFKP     |
| TMSB10.1   | 9.71E-84  | -0.60038007 | 0.607 | 0.805 | 2.45E-79 | RegC | TMSB10   |
| PAM        | 7.59E-83  | -0.32093266 | 0.626 | 0.813 | 1.91E-78 | RegC | PAM      |
| SLC22A17.1 | 7.77E-83  | -0.27899998 | 0.345 | 0.573 | 1.96E-78 | RegC | SLC22A17 |
| PDE4DIP.1  | 1.60E-82  | -0.29370326 | 0.476 | 0.708 | 4.04E-78 | RegC | PDE4DIP  |
| DDX5.1     | 5.47E-82  | 0.447691987 | 0.985 | 0.989 | 1.38E-77 | RegC | DDX5     |
| NTRK2.2    | 7.09E-82  | -0.30639445 | 0.223 | 0.436 | 1.79E-77 | RegC | NTRK2    |
| GLTSCR2    | 9.60E-82  | 0.300775055 | 0.966 | 0.967 | 2.42E-77 | RegC | GLTSCR2  |
| RHOB.2     | 5.52E-81  | -0.45476981 | 0.626 | 0.805 | 1.39E-76 | RegC | RHOB     |
| COL3A1.3   | 9.83E-81  | -1.36374169 | 0.65  | 0.795 | 2.48E-76 | RegC | COL3A1   |
| ITGA10     | 1.34E-80  | 0.377802071 | 0.905 | 0.887 | 3.38E-76 | RegC | ITGA10   |
| TUBB2B.2   | 1.64E-80  | -0.48746372 | 0.46  | 0.647 | 4.14E-76 | RegC | TUBB2B   |
| TRPV4.2    | 2.20E-80  | -0.33901909 | 0.518 | 0.724 | 5.53E-76 | RegC | TRPV4    |
| SQLE       | 3.74E-80  | -0.25153944 | 0.15  | 0.35  | 9.43E-76 | RegC | SQLE     |
| CYB5R3     | 4.93E-80  | -0.29314543 | 0.828 | 0.93  | 1.24E-75 | RegC | CYB5R3   |
| PIK3R1.1   | 1.01E-79  | 0.672687634 | 0.495 | 0.374 | 2.55E-75 | RegC | PIK3R1   |
| IFI6.1     | 1.21E-79  | -0.29185079 | 0.283 | 0.514 | 3.06E-75 | RegC | IFI6     |
| ATOX1      | 1.62E-79  | -0.28860405 | 0.511 | 0.722 | 4.09E-75 | RegC | ATOX1    |
| PRSS23.2   | 2.64E-79  | -0.58054445 | 0.119 | 0.296 | 6.65E-75 | RegC | PRSS23   |
| EIF4A1.1   | 2.82E-79  | 0.429690013 | 0.959 | 0.958 | 7.11E-75 | RegC | EIF4A1   |
| PIGT       | 9.01E-79  | -0.27492306 | 0.484 | 0.715 | 2.27E-74 | RegC | PIGT     |

|               |          |             |       |       |          |      |             |
|---------------|----------|-------------|-------|-------|----------|------|-------------|
| ATRAID.1      | 1.40E-78 | -0.29566839 | 0.799 | 0.916 | 3.54E-74 | RegC | ATRAID      |
| TAGLN.2       | 3.59E-78 | -0.95346945 | 0.068 | 0.231 | 9.03E-74 | RegC | TAGLN       |
| CSPG4         | 4.01E-78 | -0.29428934 | 0.311 | 0.528 | 1.01E-73 | RegC | CSPG4       |
| LOXL2.2       | 4.21E-78 | -0.33087374 | 0.11  | 0.284 | 1.06E-73 | RegC | LOXL2       |
| SEC61G        | 5.28E-78 | -0.29330004 | 0.923 | 0.973 | 1.33E-73 | RegC | SEC61G      |
| EGR3.1        | 6.98E-78 | -0.35091367 | 0.098 | 0.273 | 1.76E-73 | RegC | EGR3        |
| COPZ2         | 8.03E-78 | -0.25775228 | 0.384 | 0.613 | 2.02E-73 | RegC | COPZ2       |
| ACTB.3        | 1.69E-77 | -0.44313333 | 0.995 | 0.998 | 4.26E-73 | RegC | ACTB        |
| FAM162A.1     | 7.57E-77 | -0.32354328 | 0.738 | 0.889 | 1.91E-72 | RegC | FAM162A     |
| HEXB.1        | 2.01E-76 | -0.31653066 | 0.52  | 0.719 | 5.07E-72 | RegC | HEXB        |
| SLC39A14.3    | 2.32E-76 | 0.415204547 | 0.784 | 0.745 | 5.84E-72 | RegC | SLC39A14    |
| TCEB2         | 3.93E-76 | -0.277533   | 0.871 | 0.946 | 9.89E-72 | RegC | TCEB2       |
| P4HA1.1       | 5.41E-76 | -0.29875918 | 0.685 | 0.845 | 1.36E-71 | RegC | P4HA1       |
| CAV1          | 6.79E-76 | -0.37680704 | 0.608 | 0.793 | 1.71E-71 | RegC | CAV1        |
| SERTAD4-AS1.1 | 1.47E-75 | -0.31403685 | 0.444 | 0.671 | 3.72E-71 | RegC | SERTAD4-AS1 |
| SLC44A2.1     | 1.64E-75 | -0.25529281 | 0.26  | 0.481 | 4.14E-71 | RegC | SLC44A2     |
| RCN1          | 1.79E-75 | -0.28554239 | 0.48  | 0.695 | 4.52E-71 | RegC | RCN1        |
| EGR2.1        | 2.00E-75 | -0.32258525 | 0.132 | 0.312 | 5.05E-71 | RegC | EGR2        |
| OSTC.3        | 2.44E-75 | -0.32986967 | 0.704 | 0.859 | 6.14E-71 | RegC | OSTC        |
| CILP2.2       | 4.78E-75 | -0.59882936 | 0.629 | 0.78  | 1.21E-70 | RegC | CILP2       |
| PGAM1         | 1.12E-74 | -0.30537278 | 0.85  | 0.941 | 2.83E-70 | RegC | PGAM1       |
| FBXO2.3       | 3.33E-74 | -0.35108282 | 0.799 | 0.878 | 8.38E-70 | RegC | FBXO2       |
| MT1M.2        | 6.35E-74 | 0.585681502 | 0.863 | 0.815 | 1.60E-69 | RegC | MT1M        |
| COL6A1.2      | 1.02E-73 | -0.70634219 | 0.708 | 0.853 | 2.56E-69 | RegC | COL6A1      |
| CRIP2         | 8.85E-72 | -0.34391261 | 0.608 | 0.803 | 2.23E-67 | RegC | CRIP2       |
| MAFB.1        | 1.07E-71 | 0.488797224 | 0.425 | 0.28  | 2.69E-67 | RegC | MAFB        |
| YIF1A         | 1.24E-71 | -0.27328945 | 0.488 | 0.697 | 3.14E-67 | RegC | YIF1A       |
| TMED9         | 2.00E-71 | -0.25283174 | 0.876 | 0.954 | 5.03E-67 | RegC | TMED9       |
| SERPINA1.2    | 1.14E-70 | -0.51515977 | 0.98  | 0.966 | 2.87E-66 | RegC | SERPINA1    |
| KRT10         | 1.82E-70 | -0.30113351 | 0.716 | 0.855 | 4.58E-66 | RegC | KRT10       |
| ANKH.1        | 2.25E-70 | -0.39058472 | 0.577 | 0.758 | 5.66E-66 | RegC | ANKH        |
| IER2.3        | 1.10E-69 | -0.83200735 | 0.785 | 0.879 | 2.76E-65 | RegC | IER2        |
| PTN.1         | 1.11E-69 | -0.3055145  | 0.086 | 0.247 | 2.80E-65 | RegC | PTN         |
| TBCB.1        | 1.15E-69 | -0.29745916 | 0.545 | 0.729 | 2.89E-65 | RegC | TBCB        |
| LRPAP1.1      | 2.21E-69 | -0.28707934 | 0.656 | 0.831 | 5.56E-65 | RegC | LRPAP1      |
| STC2.2        | 2.71E-69 | -0.52006099 | 0.264 | 0.456 | 6.84E-65 | RegC | STC2        |
| CALM1.1       | 4.20E-69 | -0.32071379 | 0.874 | 0.952 | 1.06E-64 | RegC | CALM1       |
| HSPB1.2       | 2.62E-68 | -0.46401282 | 0.873 | 0.955 | 6.61E-64 | RegC | HSPB1       |
| NDUFB7        | 4.24E-68 | -0.26514519 | 0.678 | 0.854 | 1.07E-63 | RegC | NDUFB7      |
| PHPT1         | 9.53E-68 | -0.27164571 | 0.604 | 0.798 | 2.40E-63 | RegC | PHPT1       |
| SEC61B        | 3.55E-67 | -0.26287546 | 0.865 | 0.954 | 8.95E-63 | RegC | SEC61B      |
| EIF3E.1       | 1.60E-66 | 0.258732262 | 0.975 | 0.974 | 4.03E-62 | RegC | EIF3E       |
| HDLBP         | 8.21E-66 | -0.2583117  | 0.615 | 0.802 | 2.07E-61 | RegC | HDLBP       |
| AP3S1.1       | 1.36E-65 | -0.29357265 | 0.752 | 0.881 | 3.42E-61 | RegC | AP3S1       |
| TSPAN3.1      | 2.02E-65 | -0.25322168 | 0.462 | 0.674 | 5.08E-61 | RegC | TSPAN3      |
| SPOCK1        | 2.32E-65 | 0.339070892 | 0.365 | 0.242 | 5.83E-61 | RegC | SPOCK1      |
| ITM2C.2       | 2.57E-65 | -0.37205198 | 0.91  | 0.945 | 6.49E-61 | RegC | ITM2C       |
| ERGIC3        | 2.87E-65 | -0.26517819 | 0.673 | 0.839 | 7.24E-61 | RegC | ERGIC3      |
| MT1E.1        | 3.17E-65 | 0.368338664 | 0.993 | 0.991 | 7.98E-61 | RegC | MT1E        |
| CYSTM1.2      | 4.94E-65 | -0.30358323 | 0.475 | 0.671 | 1.24E-60 | RegC | CYSTM1      |
| PAPSS2.1      | 1.45E-64 | -0.3121896  | 0.644 | 0.8   | 3.65E-60 | RegC | PAPSS2      |
| SLC26A2       | 2.15E-64 | -0.27365059 | 0.26  | 0.453 | 5.42E-60 | RegC | SLC26A2     |
| COX7A1        | 2.17E-64 | -0.27512579 | 0.739 | 0.881 | 5.47E-60 | RegC | COX7A1      |
| GAPDH.2       | 2.84E-64 | -0.25701942 | 1     | 1     | 7.17E-60 | RegC | GAPDH       |
| PLSCR1.1      | 3.64E-64 | 0.393948984 | 0.476 | 0.365 | 9.18E-60 | RegC | PLSCR1      |
| GALNT15.2     | 4.05E-64 | 0.402361381 | 0.601 | 0.495 | 1.02E-59 | RegC | GALNT15     |
| COL5A1.3      | 1.24E-63 | -0.49712054 | 0.378 | 0.547 | 3.11E-59 | RegC | COL5A1      |
| GLRX.3        | 1.58E-63 | 0.716077945 | 0.561 | 0.473 | 3.98E-59 | RegC | GLRX        |
| QSOX1         | 1.86E-63 | -0.28701745 | 0.644 | 0.811 | 4.68E-59 | RegC | QSOX1       |
| GNAS          | 3.82E-63 | -0.26930602 | 0.609 | 0.793 | 9.62E-59 | RegC | GNAS        |

|            |          |             |       |       |          |      |          |
|------------|----------|-------------|-------|-------|----------|------|----------|
| C1R.3      | 5.12E-62 | 0.252440766 | 0.739 | 0.667 | 1.29E-57 | RegC | C1R      |
| MRC2.1     | 8.80E-62 | -0.26900903 | 0.36  | 0.56  | 2.22E-57 | RegC | MRC2     |
| SERPINE1.1 | 1.13E-61 | -0.48341065 | 0.265 | 0.436 | 2.85E-57 | RegC | SERPINE1 |
| SSR2.1     | 2.20E-61 | -0.25298746 | 0.818 | 0.918 | 5.53E-57 | RegC | SSR2     |
| PID1.2     | 2.63E-60 | -0.26203306 | 0.468 | 0.673 | 6.63E-56 | RegC | PID1     |
| GRN.1      | 3.12E-60 | -0.2783058  | 0.514 | 0.702 | 7.86E-56 | RegC | GRN      |
| EDIL3.1    | 1.03E-59 | -0.33648387 | 0.622 | 0.783 | 2.59E-55 | RegC | EDIL3    |
| HCFC1R1.2  | 2.07E-59 | -0.30648614 | 0.464 | 0.653 | 5.21E-55 | RegC | HCFC1R1  |
| SERPINH1.1 | 2.70E-59 | -0.30515369 | 0.424 | 0.618 | 6.81E-55 | RegC | SERPINH1 |
| IGF2.2     | 3.28E-59 | -0.3345841  | 0.157 | 0.324 | 8.27E-55 | RegC | IGF2     |
| COL10A1.3  | 1.29E-58 | -1.62431306 | 0.046 | 0.169 | 3.25E-54 | RegC | COL10A1  |
| IDI1.1     | 2.09E-58 | -0.35608599 | 0.425 | 0.607 | 5.27E-54 | RegC | IDI1     |
| S100A10.2  | 4.32E-58 | -0.38470916 | 0.979 | 0.996 | 1.09E-53 | RegC | S100A10  |
| TPM2.1     | 6.61E-58 | -0.33158764 | 0.693 | 0.845 | 1.66E-53 | RegC | TPM2     |
| COL6A3.2   | 8.97E-58 | -0.62754324 | 0.401 | 0.586 | 2.26E-53 | RegC | COL6A3   |
| TSPAN2.2   | 2.82E-57 | -0.3277631  | 0.542 | 0.731 | 7.11E-53 | RegC | TSPAN2   |
| KLF6.2     | 9.07E-57 | -0.32080024 | 0.617 | 0.788 | 2.29E-52 | RegC | KLF6     |
| BHLHE41.1  | 1.31E-56 | -0.31027145 | 0.437 | 0.62  | 3.31E-52 | RegC | BHLHE41  |
| VCAN.2     | 5.46E-56 | -0.37754248 | 0.137 | 0.286 | 1.38E-51 | RegC | VCAN     |
| AEBP1.2    | 7.36E-56 | 0.422181799 | 0.855 | 0.846 | 1.85E-51 | RegC | AEBP1    |
| MATN3.3    | 1.37E-55 | -0.61078094 | 0.424 | 0.571 | 3.46E-51 | RegC | MATN3    |
| MYL12A.1   | 2.20E-55 | -0.2856672  | 0.703 | 0.853 | 5.55E-51 | RegC | MYL12A   |
| COL9A1.3   | 3.02E-55 | -0.40288188 | 0.113 | 0.257 | 7.61E-51 | RegC | COL9A1   |
| CFH.2      | 3.27E-54 | 0.508775576 | 0.964 | 0.945 | 8.24E-50 | RegC | CFH      |
| GREM1.3    | 1.03E-53 | -0.56196219 | 0.131 | 0.271 | 2.60E-49 | RegC | GREM1    |
| ATP5E.1    | 2.84E-53 | -0.2930355  | 0.909 | 0.962 | 7.17E-49 | RegC | ATP5E    |
| ISLR.3     | 7.72E-53 | -0.41384629 | 0.614 | 0.769 | 1.94E-48 | RegC | ISLR     |
| LBH.1      | 1.35E-52 | 0.43241351  | 0.571 | 0.478 | 3.40E-48 | RegC | LBH      |
| ANK3.2     | 1.76E-52 | 0.378884832 | 0.45  | 0.341 | 4.45E-48 | RegC | ANK3     |
| RPL17.1    | 2.00E-51 | 0.254666164 | 0.899 | 0.911 | 5.05E-47 | RegC | RPL17    |
| CSRP1.1    | 2.29E-51 | -0.25648686 | 0.505 | 0.692 | 5.77E-47 | RegC | CSRP1    |
| ANGPTL2.1  | 9.76E-51 | -0.26829639 | 0.791 | 0.913 | 2.46E-46 | RegC | ANGPTL2  |
| ITGB1.1    | 2.22E-50 | -0.26905982 | 0.654 | 0.805 | 5.60E-46 | RegC | ITGB1    |
| CAPS.1     | 3.27E-50 | -0.26982565 | 0.252 | 0.413 | 8.23E-46 | RegC | CAPS     |
| HLA-E.1    | 4.63E-50 | 0.328916226 | 0.854 | 0.845 | 1.17E-45 | RegC | HLA-E    |
| SERPINE2.1 | 6.12E-50 | -0.41046913 | 0.463 | 0.633 | 1.54E-45 | RegC | SERPINE2 |
| FOS.2      | 4.74E-49 | -0.44546929 | 0.962 | 0.981 | 1.19E-44 | RegC | FOS      |
| RSL24D1.1  | 2.13E-48 | 0.266071771 | 0.878 | 0.887 | 5.38E-44 | RegC | RSL24D1  |
| SERTAD1.1  | 8.20E-48 | 0.441579767 | 0.838 | 0.826 | 2.07E-43 | RegC | SERTAD1  |
| CD151.1    | 2.03E-47 | -0.32518747 | 0.717 | 0.853 | 5.12E-43 | RegC | CD151    |
| RAB38      | 1.76E-46 | 0.26553966  | 0.231 | 0.136 | 4.43E-42 | RegC | RAB38    |
| WWP2.2     | 1.55E-45 | -0.35804081 | 0.757 | 0.846 | 3.91E-41 | RegC | WWP2     |
| IRF1.2     | 3.02E-45 | 0.562999939 | 0.577 | 0.499 | 7.62E-41 | RegC | IRF1     |
| CYR61.3    | 6.09E-45 | -0.4832174  | 0.894 | 0.946 | 1.53E-40 | RegC | CYR61    |
| MEF2C.1    | 1.06E-44 | -0.26406856 | 0.293 | 0.458 | 2.67E-40 | RegC | MEF2C    |
| PRELP.1    | 1.14E-44 | -0.35026689 | 0.999 | 0.997 | 2.88E-40 | RegC | PRELP    |
| SPP1.3     | 1.74E-44 | -2.72340018 | 0.25  | 0.39  | 4.38E-40 | RegC | SPP1     |
| EGR1.3     | 2.42E-44 | -0.44361712 | 0.857 | 0.922 | 6.10E-40 | RegC | EGR1     |
| NEAT1.2    | 8.95E-44 | 0.352559251 | 0.994 | 0.997 | 2.25E-39 | RegC | NEAT1    |
| SNAI2.1    | 2.63E-43 | -0.2765855  | 0.443 | 0.607 | 6.62E-39 | RegC | SNAI2    |
| ENPP1      | 7.62E-43 | -0.29295706 | 0.566 | 0.731 | 1.92E-38 | RegC | ENPP1    |
| KIAA0040.1 | 9.46E-43 | 0.437346689 | 0.671 | 0.647 | 2.38E-38 | RegC | KIAA0040 |
| ATF3.3     | 1.87E-42 | -0.52061635 | 0.458 | 0.601 | 4.71E-38 | RegC | ATF3     |
| CDO1.1     | 6.48E-42 | 0.356157283 | 0.948 | 0.964 | 1.63E-37 | RegC | CDO1     |
| PHLDA2.2   | 8.18E-42 | -0.39340573 | 0.43  | 0.589 | 2.06E-37 | RegC | PHLDA2   |
| FRZB.2     | 1.09E-41 | -0.92987484 | 0.809 | 0.82  | 2.74E-37 | RegC | FRZB     |
| PLA2G2A.2  | 1.70E-41 | 0.268173434 | 0.998 | 0.989 | 4.29E-37 | RegC | PLA2G2A  |
| DPT.3      | 2.06E-41 | -0.69482365 | 0.248 | 0.383 | 5.19E-37 | RegC | DPT      |
| MFGE8.3    | 2.63E-41 | -0.39633695 | 0.904 | 0.949 | 6.64E-37 | RegC | MFGE8    |
| RHOC.2     | 5.44E-41 | -0.26624941 | 0.783 | 0.886 | 1.37E-36 | RegC | RHOC     |

|              |          |             |       |       |          |      |              |
|--------------|----------|-------------|-------|-------|----------|------|--------------|
| APOD.2       | 2.36E-40 | -0.34645693 | 0.647 | 0.773 | 5.95E-36 | RegC | APOD         |
| ARID5B.1     | 2.62E-40 | 0.378399062 | 0.694 | 0.641 | 6.60E-36 | RegC | ARID5B       |
| DKK3.2       | 1.17E-39 | -0.30737301 | 0.297 | 0.441 | 2.96E-35 | RegC | DKK3         |
| HMOX1.1      | 6.47E-39 | 1.280170647 | 0.455 | 0.377 | 1.63E-34 | RegC | HMOX1        |
| RUNX1.1      | 8.40E-39 | 0.305294423 | 0.659 | 0.62  | 2.12E-34 | RegC | RUNX1        |
| RBP4.3       | 1.11E-38 | -0.69688221 | 0.617 | 0.715 | 2.80E-34 | RegC | RBP4         |
| HEXIM1.1     | 1.15E-38 | 0.366687769 | 0.599 | 0.556 | 2.89E-34 | RegC | HEXIM1       |
| NDRG2.2      | 3.63E-38 | -0.25544272 | 0.542 | 0.697 | 9.15E-34 | RegC | NDRG2        |
| CD44.2       | 5.32E-38 | 0.296628816 | 0.717 | 0.685 | 1.34E-33 | RegC | CD44         |
| CCNL1.2      | 7.44E-38 | 0.317500591 | 0.875 | 0.875 | 1.87E-33 | RegC | CCNL1        |
| IBSP.3       | 1.48E-37 | -2.37493317 | 0.072 | 0.167 | 3.73E-33 | RegC | IBSP         |
| TNFAIP6.3    | 1.14E-36 | -1.07817737 | 0.109 | 0.211 | 2.87E-32 | RegC | TNFAIP6      |
| AQP3.1       | 1.61E-36 | -0.30425874 | 0.234 | 0.372 | 4.06E-32 | RegC | AQP3         |
| TPPP3.2      | 7.40E-36 | -0.57249359 | 0.164 | 0.281 | 1.86E-31 | RegC | TPPP3        |
| TMEM173.1    | 1.16E-35 | 0.277730719 | 0.458 | 0.381 | 2.92E-31 | RegC | TMEM173      |
| FSTL1.2      | 1.28E-34 | -0.30538731 | 0.535 | 0.68  | 3.24E-30 | RegC | FSTL1        |
| MT1G         | 2.13E-34 | 0.422161622 | 0.785 | 0.747 | 5.37E-30 | RegC | MT1G         |
| PPP1R3C.2    | 2.79E-34 | -0.30507126 | 0.571 | 0.712 | 7.02E-30 | RegC | PPP1R3C      |
| RARRES2.3    | 8.77E-33 | -0.29632337 | 0.25  | 0.376 | 2.21E-28 | RegC | RARRES2      |
| SERPING1.2   | 1.12E-32 | 0.32081919  | 0.849 | 0.867 | 2.81E-28 | RegC | SERPING1     |
| GADD45B.3    | 1.22E-32 | 0.630870657 | 0.908 | 0.922 | 3.06E-28 | RegC | GADD45B      |
| CTSC         | 1.41E-32 | 0.379029032 | 0.358 | 0.28  | 3.55E-28 | RegC | CTSC         |
| EPB41L4A-AS1 | 3.85E-32 | 0.250679123 | 0.801 | 0.809 | 9.70E-28 | RegC | EPB41L4A-AS1 |
| THBD.1       | 6.84E-32 | 0.289144008 | 0.245 | 0.161 | 1.72E-27 | RegC | THBD         |
| COL1A2.2     | 2.01E-31 | -1.06457015 | 0.427 | 0.531 | 5.06E-27 | RegC | COL1A2       |
| SMOC2.3      | 3.33E-31 | -0.28558151 | 0.875 | 0.909 | 8.38E-27 | RegC | SMOC2        |
| TNXB.2       | 5.05E-31 | -0.33542574 | 0.212 | 0.332 | 1.27E-26 | RegC | TNXB         |
| NR1D1.2      | 5.63E-31 | -0.2550252  | 0.571 | 0.7   | 1.42E-26 | RegC | NR1D1        |
| NFKBIA.3     | 5.64E-31 | 0.741071759 | 0.871 | 0.884 | 1.42E-26 | RegC | NFKBIA       |
| EIF5.1       | 1.23E-30 | 0.267932268 | 0.931 | 0.948 | 3.11E-26 | RegC | EIF5         |
| RASD1.3      | 1.99E-30 | -0.46373892 | 0.541 | 0.651 | 5.01E-26 | RegC | RASD1        |
| MYC.1        | 1.30E-29 | 0.658151227 | 0.382 | 0.308 | 3.29E-25 | RegC | MYC          |
| TSC22D1.2    | 1.53E-29 | 0.339086559 | 0.983 | 0.974 | 3.86E-25 | RegC | TSC22D1      |
| ACAN.2       | 3.77E-29 | -0.28664254 | 0.983 | 0.967 | 9.50E-25 | RegC | ACAN         |
| MAF          | 9.70E-29 | 0.261935445 | 0.345 | 0.27  | 2.44E-24 | RegC | MAF          |
| MT1H.1       | 1.07E-28 | 0.641840302 | 0.337 | 0.26  | 2.70E-24 | RegC | MT1H         |
| GAS1.3       | 1.26E-28 | -0.30364685 | 0.322 | 0.436 | 3.17E-24 | RegC | GAS1         |
| ERRFI1.1     | 1.60E-28 | 0.398931698 | 0.797 | 0.784 | 4.03E-24 | RegC | ERRFI1       |
| CRLF1.3      | 2.17E-28 | -0.42278697 | 0.158 | 0.254 | 5.46E-24 | RegC | CRLF1        |
| ANGPTL4.2    | 2.53E-27 | 0.640658243 | 0.663 | 0.62  | 6.38E-23 | RegC | ANGPTL4      |
| CALD1.2      | 2.16E-26 | -0.28101465 | 0.666 | 0.796 | 5.45E-22 | RegC | CALD1        |
| IER3.3       | 1.34E-25 | 0.87715698  | 0.863 | 0.871 | 3.37E-21 | RegC | IER3         |
| FAM134B.2    | 4.02E-25 | 0.27661109  | 0.504 | 0.452 | 1.01E-20 | RegC | FAM134B      |
| PPP1R15A.3   | 1.37E-24 | 0.451833479 | 0.738 | 0.751 | 3.44E-20 | RegC | PPP1R15A     |
| NAMPT.1      | 2.58E-24 | 0.355937925 | 0.489 | 0.448 | 6.49E-20 | RegC | NAMPT        |
| MT1A.2       | 2.71E-24 | 0.47520164  | 0.464 | 0.411 | 6.82E-20 | RegC | MT1A         |
| NR4A1.3      | 2.75E-24 | -0.29125896 | 0.483 | 0.605 | 6.94E-20 | RegC | NR4A1        |
| PNRC1.2      | 5.75E-24 | 0.290597995 | 0.779 | 0.777 | 1.45E-19 | RegC | PNRC1        |
| ICAM1.3      | 1.23E-23 | 0.461466028 | 0.547 | 0.512 | 3.09E-19 | RegC | ICAM1        |
| PRG4.3       | 2.67E-23 | -2.10341371 | 0.297 | 0.395 | 6.72E-19 | RegC | PRG4         |
| AMD1         | 4.52E-23 | 0.263614016 | 0.608 | 0.607 | 1.14E-18 | RegC | AMD1         |
| JUN.1        | 5.95E-23 | -0.45361111 | 0.887 | 0.93  | 1.50E-18 | RegC | JUN          |
| FN1.3        | 1.15E-22 | -0.43705561 | 0.998 | 0.999 | 2.90E-18 | RegC | FN1          |
| THY1.3       | 3.86E-22 | -0.3228821  | 0.155 | 0.239 | 9.72E-18 | RegC | THY1         |
| TUBB4B       | 9.82E-22 | 0.360535113 | 0.831 | 0.852 | 2.47E-17 | RegC | TUBB4B       |
| NDRG1.1      | 5.64E-21 | 0.255176495 | 0.65  | 0.656 | 1.42E-16 | RegC | NDRG1        |
| BIRC3.1      | 7.26E-21 | 0.587316848 | 0.138 | 0.085 | 1.83E-16 | RegC | BIRC3        |
| MT1F         | 8.50E-21 | 0.284692498 | 0.697 | 0.685 | 2.14E-16 | RegC | MT1F         |
| HMGB2        | 1.31E-20 | 0.30558288  | 0.563 | 0.55  | 3.31E-16 | RegC | HMGB2        |
| ELF3         | 2.59E-20 | 0.258354512 | 0.147 | 0.092 | 6.52E-16 | RegC | ELF3         |

|            |          |             |       |       |          |        |          |
|------------|----------|-------------|-------|-------|----------|--------|----------|
| AQP1.3     | 7.57E-20 | -0.37300474 | 0.053 | 0.112 | 1.91E-15 | RegC   | AQP1     |
| ARID5A     | 3.00E-19 | 0.278270341 | 0.499 | 0.462 | 7.55E-15 | RegC   | ARID5A   |
| BAZ1A      | 4.07E-19 | 0.282569386 | 0.421 | 0.384 | 1.02E-14 | RegC   | BAZ1A    |
| CTGF.2     | 8.42E-19 | 0.253956082 | 0.973 | 0.983 | 2.12E-14 | RegC   | CTGF     |
| DNAJA1.1   | 1.20E-18 | 0.254743156 | 0.759 | 0.777 | 3.02E-14 | RegC   | DNAJA1   |
| CDKN1A.2   | 1.56E-18 | 0.257807647 | 0.829 | 0.838 | 3.93E-14 | RegC   | CDKN1A   |
| ELL2       | 2.86E-18 | 0.255942631 | 0.568 | 0.554 | 7.20E-14 | RegC   | ELL2     |
| CSRNP1.1   | 3.70E-18 | 0.275023044 | 0.694 | 0.712 | 9.31E-14 | RegC   | CSRNP1   |
| MYL9.1     | 1.34E-17 | -0.31157769 | 0.212 | 0.31  | 3.38E-13 | RegC   | MYL9     |
| BTG2.3     | 1.55E-17 | -0.30107169 | 0.644 | 0.738 | 3.90E-13 | RegC   | BTG2     |
| SOCS3.2    | 1.05E-16 | 0.25719111  | 0.806 | 0.809 | 2.65E-12 | RegC   | SOCS3    |
| COL1A1.3   | 1.46E-16 | -1.42628482 | 0.083 | 0.142 | 3.67E-12 | RegC   | COL1A1   |
| IGFBP5.3   | 8.40E-16 | -0.72279641 | 0.165 | 0.235 | 2.12E-11 | RegC   | IGFBP5   |
| CP.2       | 2.94E-15 | 0.419170418 | 0.607 | 0.604 | 7.41E-11 | RegC   | CP       |
| ZFP36.2    | 7.12E-15 | 0.340787583 | 0.948 | 0.958 | 1.79E-10 | RegC   | ZFP36    |
| SLC40A1.1  | 8.19E-15 | 0.285483558 | 0.383 | 0.344 | 2.06E-10 | RegC   | SLC40A1  |
| NFKBIZ.2   | 1.29E-13 | 0.441007903 | 0.519 | 0.518 | 3.24E-09 | RegC   | NFKBIZ   |
| TMSB4X.3   | 2.64E-13 | -0.99421728 | 0.701 | 0.785 | 6.64E-09 | RegC   | TMSB4X   |
| GLUL.2     | 6.30E-13 | 0.368975394 | 0.561 | 0.57  | 1.59E-08 | RegC   | GLUL     |
| MYO10      | 2.56E-12 | 0.336374706 | 0.302 | 0.265 | 6.45E-08 | RegC   | MYO10    |
| SQSTM1     | 3.73E-11 | 0.255590722 | 0.899 | 0.927 | 9.39E-07 | RegC   | SQSTM1   |
| ABI3BP.2   | 1.05E-10 | -0.321362   | 0.433 | 0.49  | 2.65E-06 | RegC   | ABI3BP   |
| GPX3.3     | 9.64E-09 | 0.603357613 | 0.988 | 0.989 | 0.000243 | RegC   | GPX3     |
| RGS16.3    | 1.36E-08 | 0.822232085 | 0.72  | 0.744 | 0.000343 | RegC   | RGS16    |
| WTAP.1     | 1.55E-08 | 0.305743057 | 0.622 | 0.661 | 0.00039  | RegC   | WTAP     |
| AMTN.2     | 2.19E-08 | -0.26446735 | 0.074 | 0.112 | 0.000552 | RegC   | AMTN     |
| VCAM1.3    | 2.99E-08 | 0.335654547 | 0.212 | 0.173 | 0.000754 | RegC   | VCAM1    |
| WDR74.1    | 4.74E-08 | 0.289665569 | 0.407 | 0.408 | 0.001193 | RegC   | WDR74    |
| RND1.2     | 2.89E-07 | 0.355999059 | 0.237 | 0.204 | 0.007273 | RegC   | RND1     |
| RPS26      | 9.64E-07 | 0.256844904 | 0.975 | 0.983 | 0.024293 | RegC   | RPS26    |
| TXNIP.1    | 1.79E-06 | 0.268958685 | 0.492 | 0.502 | 0.045215 | RegC   | TXNIP    |
| KLF4.2     | 2.04E-06 | 0.253706247 | 0.804 | 0.85  | 0.051478 | RegC   | KLF4     |
| C10orf10.1 | 2.10E-06 | 0.3333143   | 0.27  | 0.248 | 0.053028 | RegC   | C10orf10 |
| PDK4.1     | 3.33E-06 | 0.3070436   | 0.281 | 0.256 | 0.083992 | RegC   | PDK4     |
| TM4SF1.1   | 1.41E-05 | 0.276852189 | 0.614 | 0.628 | 0.355766 | RegC   | TM4SF1   |
| CCL2.2     | 1.83E-05 | 0.290440959 | 0.174 | 0.22  | 0.461717 | RegC   | CCL2     |
| HTRA1.3    | 0.000332 | -0.31055221 | 0.732 | 0.834 | 1        | RegC   | HTRA1    |
| TGFBI.3    | 0.000501 | -0.30390837 | 0.358 | 0.391 | 1        | RegC   | TGFBI    |
| GPRC5A.1   | 0.000642 | 0.270814672 | 0.5   | 0.528 | 1        | RegC   | GPRC5A   |
| GEM.2      | 0.000822 | 0.386954109 | 0.756 | 0.804 | 1        | RegC   | GEM      |
| RCAN1.2    | 0.004425 | 0.275330715 | 0.658 | 0.682 | 1        | RegC   | RCAN1    |
| CHI3L2.4   | 0        | 1.347384796 | 0.989 | 0.864 | 0        | preHTC | CHI3L2   |
| ASPN.2     | 0        | 1.145923752 | 0.842 | 0.567 | 0        | preHTC | ASPN     |
| CRTAC1.2   | 0        | 1.024308965 | 0.933 | 0.721 | 0        | preHTC | CRTAC1   |
| TNC.2      | 0        | 0.948577153 | 0.843 | 0.449 | 0        | preHTC | TNC      |
| CLU.4      | 0        | 0.932204044 | 1     | 1     | 0        | preHTC | CLU      |
| OGN.3      | 0        | 0.925395053 | 0.959 | 0.788 | 0        | preHTC | OGN      |
| TGFBI.4    | 0        | 0.786243705 | 0.654 | 0.342 | 0        | preHTC | TGFBI    |
| EFEMP1.3   | 0        | 0.701883927 | 0.813 | 0.53  | 0        | preHTC | EFEMP1   |
| ACTB.4     | 0        | -0.73482042 | 0.995 | 0.998 | 0        | preHTC | ACTB     |
| S100B.3    | 0        | -0.83347188 | 0.915 | 0.934 | 0        | preHTC | S100B    |
| ACTG1.3    | 0        | -0.85504791 | 0.987 | 0.996 | 0        | preHTC | ACTG1    |
| ACAN.3     | 0        | -1.03286472 | 0.959 | 0.97  | 0        | preHTC | ACAN     |
| CHAD.4     | 0        | -1.1542686  | 0.785 | 0.882 | 0        | preHTC | CHAD     |
| JUNB.3     | 0        | -1.26488625 | 0.99  | 0.994 | 0        | preHTC | JUNB     |
| C2orf82.4  | 0        | -1.45959305 | 0.929 | 0.951 | 0        | preHTC | C2orf82  |
| IER2.4     | 0        | -1.46081261 | 0.76  | 0.889 | 0        | preHTC | IER2     |
| CLEC3A.4   | 0        | -1.58184637 | 0.584 | 0.778 | 0        | preHTC | CLEC3A   |
| FGFBP2.2   | 0        | -1.6587876  | 0.929 | 0.966 | 0        | preHTC | FGFBP2   |
| FRZB.3     | 0        | -1.71781679 | 0.684 | 0.843 | 0        | preHTC | FRZB     |



|            |           |             |       |       |           |        |          |
|------------|-----------|-------------|-------|-------|-----------|--------|----------|
| FXYD1.3    | 1.15E-299 | -0.87860407 | 0.584 | 0.773 | 2.89E-295 | preHTC | FXYD1    |
| ABI3BP.3   | 1.33E-297 | 0.709682674 | 0.718 | 0.444 | 3.35E-293 | preHTC | ABI3BP   |
| JUN.2      | 6.78E-291 | -1.3546825  | 0.856 | 0.938 | 1.71E-286 | preHTC | JUN      |
| FOS.3      | 2.62E-289 | -1.14348658 | 0.956 | 0.984 | 6.60E-285 | preHTC | FOS      |
| EGR1.4     | 5.66E-281 | -0.92436395 | 0.842 | 0.928 | 1.43E-276 | preHTC | EGR1     |
| NR4A1.4    | 2.29E-279 | -1.05884096 | 0.374 | 0.631 | 5.78E-275 | preHTC | NR4A1    |
| NNMT.3     | 3.60E-275 | 0.597184546 | 0.997 | 0.956 | 9.07E-271 | preHTC | NNMT     |
| DIO2.2     | 8.00E-275 | 0.603306017 | 0.451 | 0.198 | 2.02E-270 | preHTC | DIO2     |
| MDF1.3     | 3.32E-266 | -0.74937438 | 0.54  | 0.735 | 8.37E-262 | preHTC | MDF1     |
| CRISPLD1.3 | 5.01E-259 | -1.4356165  | 0.283 | 0.547 | 1.26E-254 | preHTC | CRISPLD1 |
| STC2.3     | 1.44E-253 | -1.11370724 | 0.196 | 0.479 | 3.62E-249 | preHTC | STC2     |
| TUBB2B.3   | 3.27E-253 | -0.75394847 | 0.418 | 0.665 | 8.25E-249 | preHTC | TUBB2B   |
| SMOC1.2    | 3.99E-253 | 0.59181436  | 0.684 | 0.446 | 1.01E-248 | preHTC | SMOC1    |
| SCRG1.4    | 4.63E-253 | -0.91042596 | 0.996 | 0.993 | 1.17E-248 | preHTC | SCRG1    |
| IFITM3.4   | 9.66E-251 | 0.534345428 | 0.992 | 0.968 | 2.43E-246 | preHTC | IFITM3   |
| CYTL1.4    | 3.06E-249 | -1.44892027 | 0.842 | 0.905 | 7.71E-245 | preHTC | CYTL1    |
| SLC14A1.2  | 2.38E-248 | -0.70920423 | 0.173 | 0.462 | 6.00E-244 | preHTC | SLC14A1  |
| HTRA1.4    | 2.46E-243 | 1.018865607 | 0.896 | 0.811 | 6.20E-239 | preHTC | HTRA1    |
| SPINT2.3   | 2.35E-240 | -0.66281896 | 0.88  | 0.908 | 5.91E-236 | preHTC | SPINT2   |
| THY1.4     | 6.15E-231 | 0.300918663 | 0.439 | 0.194 | 1.55E-226 | preHTC | THY1     |
| TF.3       | 3.59E-229 | -1.63815378 | 0.331 | 0.567 | 9.04E-225 | preHTC | TF       |
| FOSB.2     | 5.02E-225 | -1.10851886 | 0.75  | 0.871 | 1.27E-220 | preHTC | FOSB     |
| COL9A2.3   | 8.24E-225 | -0.69700991 | 0.516 | 0.725 | 2.08E-220 | preHTC | COL9A2   |
| RASD1.4    | 6.37E-224 | -1.30475985 | 0.465 | 0.671 | 1.61E-219 | preHTC | RASD1    |
| LECT1.4    | 3.15E-217 | -1.11976596 | 0.273 | 0.514 | 7.94E-213 | preHTC | LECT1    |
| FTL.1      | 2.28E-211 | -0.33050456 | 1     | 1     | 5.73E-207 | preHTC | FTL      |
| GALNT15.3  | 7.16E-211 | 0.454177897 | 0.704 | 0.47  | 1.80E-206 | preHTC | GALNT15  |
| COL15A1.2  | 2.41E-210 | 0.414676084 | 0.577 | 0.327 | 6.08E-206 | preHTC | COL15A1  |
| RPLP0.1    | 1.42E-209 | 0.297501059 | 0.999 | 1     | 3.57E-205 | preHTC | RPLP0    |
| FBXO2.4    | 1.93E-208 | -0.55057254 | 0.816 | 0.88  | 4.87E-204 | preHTC | FBXO2    |
| FAM134B.3  | 7.19E-207 | 0.430519485 | 0.65  | 0.423 | 1.81E-202 | preHTC | FAM134B  |
| WIF1.3     | 2.13E-205 | -0.63726146 | 0.048 | 0.279 | 5.37E-201 | preHTC | WIF1     |
| LUM.2      | 4.31E-205 | 0.509674991 | 1     | 0.999 | 1.09E-200 | preHTC | LUM      |
| COL9A3.3   | 6.15E-201 | -0.66534505 | 0.853 | 0.907 | 1.55E-196 | preHTC | COL9A3   |
| SRSF7.1    | 7.40E-199 | -0.71019454 | 0.781 | 0.872 | 1.86E-194 | preHTC | SRSF7    |
| RBP4.4     | 4.11E-198 | -1.07744136 | 0.569 | 0.73  | 1.04E-193 | preHTC | RBP4     |
| HAPLN1.3   | 7.13E-198 | -0.82871224 | 0.95  | 0.951 | 1.80E-193 | preHTC | HAPLN1   |
| NT5E.2     | 2.10E-197 | 0.438223533 | 0.658 | 0.448 | 5.28E-193 | preHTC | NT5E     |
| ATF3.4     | 8.98E-196 | -0.89596296 | 0.406 | 0.618 | 2.26E-191 | preHTC | ATF3     |
| SERPINA5.4 | 5.66E-195 | -0.71595574 | 0.778 | 0.857 | 1.43E-190 | preHTC | SERPINA5 |
| FAP.2      | 7.73E-194 | 0.318755876 | 0.508 | 0.265 | 1.95E-189 | preHTC | FAP      |
| PTGES.2    | 1.23E-193 | 0.595267857 | 0.557 | 0.34  | 3.09E-189 | preHTC | PTGES    |
| THBS3.2    | 1.30E-192 | 0.355229983 | 0.538 | 0.308 | 3.27E-188 | preHTC | THBS3    |
| PDPN.2     | 5.91E-191 | -0.96963381 | 0.67  | 0.785 | 1.49E-186 | preHTC | PDPN     |
| NDRG2.3    | 7.86E-190 | -0.53801724 | 0.518 | 0.711 | 1.98E-185 | preHTC | NDRG2    |
| MIA.2      | 4.52E-189 | -0.65271463 | 0.954 | 0.961 | 1.14E-184 | preHTC | MIA      |
| AEBP1.3    | 1.14E-187 | 0.496607272 | 0.938 | 0.831 | 2.88E-183 | preHTC | AEBP1    |
| ANK3.3     | 2.76E-187 | 0.39718804  | 0.549 | 0.317 | 6.96E-183 | preHTC | ANK3     |
| GSN.2      | 8.40E-187 | -0.45878993 | 0.892 | 0.943 | 2.12E-182 | preHTC | GSN      |
| WWP2.3     | 1.04E-185 | -0.64693715 | 0.748 | 0.853 | 2.61E-181 | preHTC | WWP2     |
| ITM2C.3    | 1.06E-185 | -0.53329237 | 0.912 | 0.947 | 2.68E-181 | preHTC | ITM2C    |
| DUSP1.3    | 4.60E-184 | -0.71313418 | 0.656 | 0.797 | 1.16E-179 | preHTC | DUSP1    |
| COMP.3     | 1.05E-183 | 0.553121437 | 1     | 0.999 | 2.65E-179 | preHTC | COMP     |
| NTN1.2     | 2.18E-183 | 0.273670797 | 0.354 | 0.157 | 5.49E-179 | preHTC | NTN1     |
| MCL1.1     | 8.08E-180 | -0.51812297 | 0.78  | 0.868 | 2.04E-175 | preHTC | MCL1     |
| PHOSPHO1.2 | 1.54E-179 | -0.42049744 | 0.04  | 0.245 | 3.88E-175 | preHTC | PHOSPHO1 |
| PLAC9.2    | 1.38E-178 | -0.69301336 | 0.956 | 0.974 | 3.48E-174 | preHTC | PLAC9    |
| PART1.2    | 2.45E-178 | 0.534245331 | 0.621 | 0.408 | 6.17E-174 | preHTC | PART1    |
| COL3A1.4   | 1.42E-177 | 0.838300369 | 0.874 | 0.765 | 3.58E-173 | preHTC | COL3A1   |
| MST4.3     | 2.75E-177 | -0.5190009  | 0.411 | 0.609 | 6.94E-173 | preHTC | MST4     |

|               |           |             |       |       |           |        |             |
|---------------|-----------|-------------|-------|-------|-----------|--------|-------------|
| VCAM1.4       | 6.74E-176 | 0.857678195 | 0.333 | 0.15  | 1.70E-171 | preHTC | VCAM1       |
| COL11A2.3     | 1.19E-175 | -0.46472733 | 0.608 | 0.775 | 2.99E-171 | preHTC | COL11A2     |
| MIR24-2.1     | 3.36E-173 | -0.70882255 | 0.525 | 0.717 | 8.47E-169 | preHTC | MIR24-2     |
| MRPS6.2       | 5.01E-173 | -0.55348956 | 0.564 | 0.711 | 1.26E-168 | preHTC | MRPS6       |
| CHRDL2.3      | 1.26E-170 | -1.15472457 | 0.083 | 0.294 | 3.17E-166 | preHTC | CHRDL2      |
| FOXA3.2       | 6.01E-168 | -0.52767624 | 0.248 | 0.459 | 1.51E-163 | preHTC | FOXA3       |
| BTG2.4        | 1.33E-166 | -0.90057077 | 0.621 | 0.747 | 3.35E-162 | preHTC | BTG2        |
| TTLL7.3       | 6.46E-163 | -0.41196639 | 0.203 | 0.416 | 1.63E-158 | preHTC | TTLL7       |
| S100A1.3      | 1.36E-162 | -0.58723244 | 0.813 | 0.909 | 3.43E-158 | preHTC | S100A1      |
| CHI3L1.4      | 4.86E-161 | 1.087513304 | 0.884 | 0.771 | 1.23E-156 | preHTC | CHI3L1      |
| GAS1.4        | 5.57E-161 | 0.526834935 | 0.599 | 0.395 | 1.40E-156 | preHTC | GAS1        |
| ITM2A.3       | 5.76E-161 | -0.60534344 | 0.566 | 0.721 | 1.45E-156 | preHTC | ITM2A       |
| PMP22.2       | 2.69E-160 | 0.405448523 | 0.936 | 0.89  | 6.77E-156 | preHTC | PMP22       |
| COL1A2.3      | 3.70E-160 | 0.381805025 | 0.699 | 0.49  | 9.33E-156 | preHTC | COL1A2      |
| BHLHE41.2     | 1.17E-159 | -0.52040775 | 0.443 | 0.63  | 2.94E-155 | preHTC | BHLHE41     |
| LGI4.1        | 1.89E-157 | -0.35017136 | 0.058 | 0.252 | 4.76E-153 | preHTC | LGI4        |
| DKK1.3        | 4.98E-154 | -0.63759612 | 0.03  | 0.211 | 1.25E-149 | preHTC | DKK1        |
| COL12A1.2     | 1.00E-153 | 0.417012339 | 0.559 | 0.342 | 2.53E-149 | preHTC | COL12A1     |
| GDF10.3       | 1.06E-153 | -0.58649078 | 0.455 | 0.671 | 2.67E-149 | preHTC | GDF10       |
| GEM.3         | 2.38E-153 | -0.62952208 | 0.681 | 0.819 | 5.99E-149 | preHTC | GEM         |
| EXTL1.2       | 4.46E-151 | -0.30552777 | 0.073 | 0.265 | 1.12E-146 | preHTC | EXTL1       |
| SCIN.2        | 2.06E-148 | -0.42060504 | 0.347 | 0.54  | 5.19E-144 | preHTC | SCIN        |
| MEG3.2        | 1.76E-147 | -0.73118542 | 0.339 | 0.548 | 4.44E-143 | preHTC | MEG3        |
| LTBP2.2       | 7.05E-146 | 0.322644997 | 0.563 | 0.349 | 1.77E-141 | preHTC | LTBP2       |
| LDLRAD4.3     | 8.42E-144 | -0.4939938  | 0.485 | 0.639 | 2.12E-139 | preHTC | LDLRAD4     |
| SLC39A14.4    | 1.01E-142 | 0.40334855  | 0.837 | 0.733 | 2.54E-138 | preHTC | SLC39A14    |
| COL9A1.4      | 2.40E-140 | -0.50955471 | 0.082 | 0.27  | 6.05E-136 | preHTC | COL9A1      |
| SERPINA1.3    | 3.57E-139 | -0.63005571 | 0.971 | 0.967 | 9.01E-135 | preHTC | SERPINA1    |
| IDI1.2        | 4.86E-139 | -0.51526815 | 0.453 | 0.613 | 1.22E-134 | preHTC | IDI1        |
| DPT.4         | 1.15E-138 | 0.396178467 | 0.544 | 0.34  | 2.91E-134 | preHTC | DPT         |
| COL6A2.3      | 3.45E-138 | 0.317433007 | 0.914 | 0.883 | 8.68E-134 | preHTC | COL6A2      |
| INSIG1.3      | 1.54E-137 | -0.61756212 | 0.35  | 0.525 | 3.88E-133 | preHTC | INSIG1      |
| CTA-29F11.1.2 | 3.61E-137 | -0.36901925 | 0.218 | 0.425 | 9.10E-133 | preHTC | CTA-29F11.1 |
| AC005152.3.1  | 1.45E-135 | -0.39583373 | 0.079 | 0.263 | 3.64E-131 | preHTC | AC005152.3  |
| SOD2.3        | 4.24E-135 | 0.579789043 | 0.916 | 0.847 | 1.07E-130 | preHTC | SOD2        |
| METTL7A.2     | 4.08E-134 | -0.39487562 | 0.336 | 0.546 | 1.03E-129 | preHTC | METTL7A     |
| KAL1.1        | 3.05E-133 | 0.250254207 | 0.39  | 0.21  | 7.67E-129 | preHTC | KAL1        |
| CRYAB.3       | 5.31E-129 | -0.87421698 | 0.742 | 0.837 | 1.34E-124 | preHTC | CRYAB       |
| LDLR.2        | 1.83E-127 | -0.43103095 | 0.238 | 0.424 | 4.61E-123 | preHTC | LDLR        |
| BHLHE40.3     | 7.37E-127 | -0.62537171 | 0.728 | 0.81  | 1.86E-122 | preHTC | BHLHE40     |
| ADAMTS5.2     | 8.30E-127 | 0.369163006 | 0.258 | 0.116 | 2.09E-122 | preHTC | ADAMTS5     |
| COL5A1.4      | 1.57E-125 | 0.440597586 | 0.666 | 0.507 | 3.95E-121 | preHTC | COL5A1      |
| PPP1R3C.3     | 8.00E-125 | -0.71099434 | 0.582 | 0.718 | 2.01E-120 | preHTC | PPP1R3C     |
| NR4A2.1       | 1.36E-124 | -0.52931385 | 0.486 | 0.647 | 3.43E-120 | preHTC | NR4A2       |
| STK38L.3      | 7.92E-122 | -0.48279122 | 0.563 | 0.701 | 2.00E-117 | preHTC | STK38L      |
| TAGLN.3       | 1.61E-121 | -1.06278189 | 0.074 | 0.239 | 4.06E-117 | preHTC | TAGLN       |
| GLI3.1        | 2.66E-120 | 0.328065027 | 0.588 | 0.422 | 6.70E-116 | preHTC | GLI3        |
| SLC7A2.2      | 1.31E-119 | 0.425806733 | 0.514 | 0.349 | 3.29E-115 | preHTC | SLC7A2      |
| SPTSSB.2      | 1.35E-119 | -0.36380869 | 0.058 | 0.218 | 3.39E-115 | preHTC | SPTSSB      |
| RHOB.3        | 1.98E-119 | -0.53497603 | 0.702 | 0.802 | 5.00E-115 | preHTC | RHOB        |
| CFH.3         | 6.68E-119 | -0.6100745  | 0.916 | 0.952 | 1.68E-114 | preHTC | CFH         |
| NGFRAP1.2     | 1.53E-118 | -0.35299475 | 0.859 | 0.908 | 3.87E-114 | preHTC | NGFRAP1     |
| PEBP1.1       | 2.35E-115 | -0.29302533 | 0.939 | 0.966 | 5.93E-111 | preHTC | PEBP1       |
| TRPV4.3       | 5.93E-115 | -0.38397946 | 0.576 | 0.726 | 1.49E-110 | preHTC | TRPV4       |
| TPM4.2        | 1.10E-112 | -0.49704581 | 0.557 | 0.668 | 2.76E-108 | preHTC | TPM4        |
| ITGB8         | 1.56E-112 | 0.278526307 | 0.246 | 0.113 | 3.92E-108 | preHTC | ITGB8       |
| JUND.1        | 1.19E-110 | -0.44336378 | 0.731 | 0.817 | 2.99E-106 | preHTC | JUND        |
| PLAUR.3       | 9.96E-110 | 0.290256804 | 0.487 | 0.307 | 2.51E-105 | preHTC | PLAUR       |
| CP.3          | 1.81E-109 | -0.25620737 | 0.448 | 0.631 | 4.57E-105 | preHTC | CP          |
| RGS3.1        | 3.86E-108 | -0.48406995 | 0.733 | 0.824 | 9.71E-104 | preHTC | RGS3        |

|                 |           |             |       |       |           |        |               |
|-----------------|-----------|-------------|-------|-------|-----------|--------|---------------|
| IFITM2.4        | 1.81E-107 | 0.40340688  | 0.903 | 0.82  | 4.57E-103 | preHTC | IFITM2        |
| TSPAN13.2       | 2.68E-105 | -0.52419071 | 0.214 | 0.369 | 6.75E-101 | preHTC | TSPAN13       |
| FGFR1.2         | 3.79E-105 | -0.44432005 | 0.627 | 0.729 | 9.54E-101 | preHTC | FGFR1         |
| CD55.3          | 1.20E-104 | 0.58409998  | 0.781 | 0.712 | 3.03E-100 | preHTC | CD55          |
| NFATC1.1        | 3.50E-102 | -0.39848559 | 0.436 | 0.587 | 8.81E-98  | preHTC | NFATC1        |
| HSPB1.3         | 2.96E-101 | -0.60187831 | 0.921 | 0.952 | 7.46E-97  | preHTC | HSPB1         |
| CNN2.1          | 4.12E-101 | -0.28257098 | 0.183 | 0.348 | 1.04E-96  | preHTC | CNN2          |
| C1R.4           | 1.56E-99  | 0.319752514 | 0.796 | 0.653 | 3.92E-95  | preHTC | C1R           |
| CTGF.3          | 4.09E-98  | 0.413665088 | 0.992 | 0.98  | 1.03E-93  | preHTC | CTGF          |
| PPP3CA.1        | 1.52E-97  | 0.317480134 | 0.85  | 0.767 | 3.82E-93  | preHTC | PPP3CA        |
| TCF4.2          | 2.42E-97  | 0.302926785 | 0.714 | 0.577 | 6.11E-93  | preHTC | TCF4          |
| FCGRT.2         | 4.50E-96  | -0.32699189 | 0.72  | 0.81  | 1.13E-91  | preHTC | FCGRT         |
| COL10A1.4       | 7.53E-96  | -1.70178057 | 0.045 | 0.176 | 1.90E-91  | preHTC | COL10A1       |
| AP3S1.2         | 7.57E-95  | -0.33333495 | 0.814 | 0.877 | 1.91E-90  | preHTC | AP3S1         |
| TOB1.1          | 9.98E-95  | -0.37277368 | 0.506 | 0.647 | 2.51E-90  | preHTC | TOB1          |
| MT1M.3          | 2.84E-94  | 0.481257215 | 0.89  | 0.808 | 7.15E-90  | preHTC | MT1M          |
| ADM.2           | 4.07E-94  | -0.45686257 | 0.343 | 0.51  | 1.02E-89  | preHTC | ADM           |
| TAGLN2.3        | 1.08E-92  | 0.278037927 | 0.848 | 0.784 | 2.71E-88  | preHTC | TAGLN2        |
| CRLF1.4         | 1.88E-92  | 0.287970738 | 0.374 | 0.223 | 4.75E-88  | preHTC | CRLF1         |
| NFKBIZ.3        | 1.20E-90  | 0.415896101 | 0.642 | 0.497 | 3.03E-86  | preHTC | NFKBIZ        |
| CDON.1          | 1.23E-90  | 0.251209409 | 0.582 | 0.425 | 3.09E-86  | preHTC | CDON          |
| HMGCS1.2        | 5.42E-90  | -0.5635222  | 0.278 | 0.427 | 1.37E-85  | preHTC | HMGCS1        |
| TSPYL2.1        | 4.21E-89  | -0.3073411  | 0.376 | 0.53  | 1.06E-84  | preHTC | TSPYL2        |
| C2orf40.2       | 1.60E-88  | -0.72908655 | 0.999 | 0.999 | 4.02E-84  | preHTC | C2orf40       |
| UGP2.3          | 6.51E-88  | 0.309752685 | 0.902 | 0.87  | 1.64E-83  | preHTC | UGP2          |
| CYSTM1.3        | 1.66E-87  | -0.34323244 | 0.553 | 0.67  | 4.17E-83  | preHTC | CYSTM1        |
| ARID5B.2        | 4.12E-87  | 0.326185394 | 0.761 | 0.626 | 1.04E-82  | preHTC | ARID5B        |
| MSMO1.2         | 2.85E-86  | -0.42788002 | 0.261 | 0.404 | 7.18E-82  | preHTC | MSMO1         |
| PRPSAP1.1       | 3.16E-86  | -0.25369553 | 0.295 | 0.446 | 7.96E-82  | preHTC | PRPSAP1       |
| CST3.4          | 8.78E-86  | -0.49866608 | 0.995 | 0.997 | 2.21E-81  | preHTC | CST3          |
| PDE4DIP.2       | 2.74E-85  | -0.28978891 | 0.585 | 0.703 | 6.91E-81  | preHTC | PDE4DIP       |
| CD99.2          | 9.83E-85  | -0.2977335  | 0.96  | 0.976 | 2.48E-80  | preHTC | CD99          |
| REXO2.1         | 1.99E-84  | 0.256704957 | 0.903 | 0.863 | 5.02E-80  | preHTC | REXO2         |
| UQCR10.1        | 2.33E-84  | -0.26430079 | 0.714 | 0.813 | 5.87E-80  | preHTC | UQCR10        |
| DDIT4.1         | 2.57E-84  | -0.69533091 | 0.404 | 0.544 | 6.47E-80  | preHTC | DDIT4         |
| GPX3.4          | 4.41E-84  | -0.49100608 | 0.988 | 0.99  | 1.11E-79  | preHTC | GPX3          |
| FN1.4           | 1.15E-83  | 0.479481706 | 0.999 | 0.999 | 2.89E-79  | preHTC | FN1           |
| STEAP1.1        | 1.79E-83  | 0.25857829  | 0.515 | 0.362 | 4.51E-79  | preHTC | STEAP1        |
| CDKN1A.3        | 2.19E-83  | -0.40975791 | 0.789 | 0.845 | 5.51E-79  | preHTC | CDKN1A        |
| ILF3-AS1        | 4.45E-83  | -0.25899136 | 0.284 | 0.442 | 1.12E-78  | preHTC | ILF3-AS1      |
| RP11-983P16.4.2 | 5.69E-83  | -0.29297658 | 0.432 | 0.572 | 1.43E-78  | preHTC | RP11-983P16.4 |
| ZFP36.3         | 3.25E-82  | -0.55211889 | 0.937 | 0.96  | 8.18E-78  | preHTC | ZFP36         |
| SERPINI1.2      | 6.98E-82  | -0.378762   | 0.257 | 0.398 | 1.76E-77  | preHTC | SERPINI1      |
| SLPI.2          | 1.13E-81  | -0.54553079 | 0.107 | 0.246 | 2.84E-77  | preHTC | SLPI          |
| CD68.1          | 3.03E-81  | 0.256245122 | 0.55  | 0.407 | 7.63E-77  | preHTC | CD68          |
| BZW1.1          | 1.11E-80  | 0.307624017 | 0.917 | 0.882 | 2.79E-76  | preHTC | BZW1          |
| HES1.3          | 2.66E-80  | -0.56105335 | 0.384 | 0.522 | 6.71E-76  | preHTC | HES1          |
| APOD.3          | 5.74E-79  | -0.5364564  | 0.685 | 0.774 | 1.45E-74  | preHTC | APOD          |
| CYR61.4         | 2.50E-78  | -0.72133284 | 0.935 | 0.942 | 6.29E-74  | preHTC | CYR61         |
| MT2A.3          | 9.25E-78  | 0.385444229 | 0.999 | 0.999 | 2.33E-73  | preHTC | MT2A          |
| MEF2C.2         | 3.25E-77  | -0.34846306 | 0.325 | 0.462 | 8.18E-73  | preHTC | MEF2C         |
| WSB1.1          | 6.97E-77  | -0.26385266 | 0.732 | 0.82  | 1.76E-72  | preHTC | WSB1          |
| FNIP2           | 1.35E-76  | 0.318019315 | 0.495 | 0.365 | 3.39E-72  | preHTC | FNIP2         |
| ADRB2.1         | 2.63E-76  | -0.33530124 | 0.292 | 0.429 | 6.63E-72  | preHTC | ADRB2         |
| CLEC11A         | 4.65E-76  | -0.27814516 | 0.2   | 0.349 | 1.17E-71  | preHTC | CLEC11A       |
| DUSP14.1        | 1.04E-75  | -0.38086286 | 0.516 | 0.623 | 2.62E-71  | preHTC | DUSP14        |
| S100A4.4        | 1.43E-75  | 0.384347931 | 0.704 | 0.601 | 3.59E-71  | preHTC | S100A4        |
| KLF10.3         | 4.76E-75  | -0.36827186 | 0.489 | 0.614 | 1.20E-70  | preHTC | KLF10         |
| SETD5-AS1.1     | 5.31E-74  | -0.31178306 | 0.588 | 0.7   | 1.34E-69  | preHTC | SETD5-AS1     |
| CD9.1           | 4.39E-72  | -0.38594368 | 0.935 | 0.958 | 1.11E-67  | preHTC | CD9           |

|            |          |             |       |       |          |        |          |
|------------|----------|-------------|-------|-------|----------|--------|----------|
| NR1D1.3    | 5.41E-72 | -0.38755609 | 0.593 | 0.704 | 1.36E-67 | preHTC | NR1D1    |
| TNFAIP6.4  | 6.16E-72 | 0.733492996 | 0.304 | 0.184 | 1.55E-67 | preHTC | TNFAIP6  |
| PHLDA1.1   | 1.10E-71 | -0.47364319 | 0.678 | 0.755 | 2.76E-67 | preHTC | PHLDA1   |
| DDIT3.1    | 1.54E-71 | -0.36849628 | 0.664 | 0.759 | 3.87E-67 | preHTC | DDIT3    |
| DAP.2      | 1.86E-70 | -0.2587353  | 0.622 | 0.716 | 4.69E-66 | preHTC | DAP      |
| CCPG1      | 3.28E-70 | 0.270520154 | 0.923 | 0.909 | 8.27E-66 | preHTC | CCPG1    |
| TSPAN3.2   | 5.79E-70 | -0.25174168 | 0.563 | 0.669 | 1.46E-65 | preHTC | TSPAN3   |
| SOX9.1     | 8.89E-70 | -0.33630824 | 0.646 | 0.739 | 2.24E-65 | preHTC | SOX9     |
| NGF.2      | 1.13E-69 | 0.291060157 | 0.345 | 0.217 | 2.86E-65 | preHTC | NGF      |
| GLIPR1.2   | 7.99E-69 | -0.31740931 | 0.545 | 0.666 | 2.01E-64 | preHTC | GLIPR1   |
| CSRP1.2    | 1.61E-67 | -0.28961495 | 0.587 | 0.689 | 4.05E-63 | preHTC | CSRP1    |
| RAMP1.3    | 3.52E-67 | -0.42392087 | 0.16  | 0.284 | 8.86E-63 | preHTC | RAMP1    |
| EMP1.2     | 2.08E-66 | -0.55234253 | 0.699 | 0.76  | 5.24E-62 | preHTC | EMP1     |
| GLRX.4     | 2.39E-66 | 0.403793827 | 0.59  | 0.463 | 6.01E-62 | preHTC | GLRX     |
| CD59.2     | 3.45E-66 | -0.28792527 | 0.918 | 0.948 | 8.70E-62 | preHTC | CD59     |
| HSPB6.2    | 4.07E-66 | -0.27962268 | 0.323 | 0.446 | 1.03E-61 | preHTC | HSPB6    |
| OSTC.4     | 7.72E-66 | 0.27067953  | 0.854 | 0.843 | 1.95E-61 | preHTC | OSTC     |
| GPC6.1     | 1.33E-65 | -0.28301431 | 0.671 | 0.75  | 3.36E-61 | preHTC | GPC6     |
| ANGPTL2.2  | 3.30E-64 | 0.257397419 | 0.945 | 0.893 | 8.32E-60 | preHTC | ANGPTL2  |
| EDIL3.2    | 4.29E-64 | -0.32725342 | 0.718 | 0.775 | 1.08E-59 | preHTC | EDIL3    |
| EGR3.2     | 7.63E-64 | -0.35460174 | 0.158 | 0.273 | 1.92E-59 | preHTC | EGR3     |
| CSRNP1.2   | 2.41E-63 | -0.26154177 | 0.618 | 0.726 | 6.07E-59 | preHTC | CSRNP1   |
| CAPS.2     | 2.41E-62 | 0.268895436 | 0.504 | 0.379 | 6.07E-58 | preHTC | CAPS     |
| SNAI1.1    | 3.85E-62 | -0.28972017 | 0.298 | 0.425 | 9.71E-58 | preHTC | SNAI1    |
| MYL12A.2   | 2.45E-60 | -0.28982469 | 0.795 | 0.846 | 6.17E-56 | preHTC | MYL12A   |
| RARRES2.4  | 2.46E-60 | -0.33642222 | 0.245 | 0.384 | 6.21E-56 | preHTC | RARRES2  |
| SDC2.3     | 3.89E-60 | -0.26797956 | 0.935 | 0.964 | 9.80E-56 | preHTC | SDC2     |
| IBSP.4     | 5.12E-60 | -2.53588872 | 0.073 | 0.173 | 1.29E-55 | preHTC | IBSP     |
| FXYD6.2    | 2.02E-59 | -0.30988655 | 0.842 | 0.88  | 5.10E-55 | preHTC | FXYD6    |
| AKR1C2.1   | 6.29E-59 | 0.294910187 | 0.572 | 0.444 | 1.58E-54 | preHTC | AKR1C2   |
| VASN       | 6.76E-59 | -0.2582218  | 0.633 | 0.726 | 1.70E-54 | preHTC | VASN     |
| MYADM.1    | 1.03E-58 | -0.32522069 | 0.824 | 0.877 | 2.60E-54 | preHTC | MYADM    |
| 7SK.2.1    | 1.39E-58 | 0.398039502 | 0.231 | 0.133 | 3.50E-54 | preHTC | 7SK.2    |
| CILP2.3    | 2.00E-58 | 0.383229893 | 0.809 | 0.758 | 5.03E-54 | preHTC | CILP2    |
| NEU1.1     | 5.18E-58 | -0.31120587 | 0.38  | 0.49  | 1.30E-53 | preHTC | NEU1     |
| KLF2.1     | 7.75E-58 | -0.28759582 | 0.393 | 0.514 | 1.95E-53 | preHTC | KLF2     |
| MATN3.4    | 3.03E-57 | -0.44162925 | 0.442 | 0.576 | 7.63E-53 | preHTC | MATN3    |
| ANGPTL4.3  | 6.67E-57 | 0.325990639 | 0.727 | 0.606 | 1.68E-52 | preHTC | ANGPTL4  |
| TUBB2A     | 1.34E-56 | -0.26797661 | 0.599 | 0.704 | 3.37E-52 | preHTC | TUBB2A   |
| FIBIN.2    | 2.24E-56 | 0.341620668 | 0.892 | 0.835 | 5.66E-52 | preHTC | FIBIN    |
| DLX5.2     | 7.15E-56 | -0.30228186 | 0.395 | 0.508 | 1.80E-51 | preHTC | DLX5     |
| CD83.1     | 2.31E-55 | -0.26773579 | 0.08  | 0.179 | 5.81E-51 | preHTC | CD83     |
| GADD45B.4  | 1.30E-54 | -0.57726632 | 0.896 | 0.925 | 3.27E-50 | preHTC | GADD45B  |
| TPD52L1.1  | 4.65E-54 | -0.36497342 | 0.72  | 0.79  | 1.17E-49 | preHTC | TPD52L1  |
| H3F3B.2    | 1.50E-53 | -0.26122997 | 1     | 1     | 3.77E-49 | preHTC | H3F3B    |
| IGF2.3     | 3.14E-53 | -0.28590145 | 0.206 | 0.325 | 7.92E-49 | preHTC | IGF2     |
| MAFB.2     | 5.84E-53 | 0.313612185 | 0.399 | 0.276 | 1.47E-48 | preHTC | MAFB     |
| CPE.2      | 2.39E-52 | -0.34303563 | 0.276 | 0.38  | 6.03E-48 | preHTC | CPE      |
| BTG1.3     | 7.52E-52 | 0.441737502 | 0.947 | 0.929 | 1.89E-47 | preHTC | BTG1     |
| MFI2.2     | 1.54E-51 | -0.26648247 | 0.49  | 0.586 | 3.87E-47 | preHTC | MFI2     |
| CTHRC1.3   | 1.60E-51 | 0.283373839 | 0.659 | 0.533 | 4.02E-47 | preHTC | CTHRC1   |
| SERPINE2.2 | 4.56E-51 | 0.446189052 | 0.672 | 0.607 | 1.15E-46 | preHTC | SERPINE2 |
| TIMP4.2    | 7.97E-51 | -0.30215272 | 0.587 | 0.662 | 2.01E-46 | preHTC | TIMP4    |
| SKIL       | 1.62E-50 | -0.25497331 | 0.524 | 0.619 | 4.07E-46 | preHTC | SKIL     |
| MT1G.1     | 2.59E-50 | 0.315905807 | 0.807 | 0.741 | 6.54E-46 | preHTC | MT1G     |
| CALM1.2    | 8.53E-49 | -0.2622171  | 0.921 | 0.949 | 2.15E-44 | preHTC | CALM1    |
| SCARA3.2   | 3.46E-48 | 0.259184539 | 0.675 | 0.571 | 8.73E-44 | preHTC | SCARA3   |
| KLF4.3     | 5.77E-48 | -0.35371503 | 0.804 | 0.853 | 1.45E-43 | preHTC | KLF4     |
| ADAMTS1.1  | 1.97E-47 | 0.319861398 | 0.276 | 0.179 | 4.96E-43 | preHTC | ADAMTS1  |
| MT1H.2     | 3.01E-47 | 0.349915379 | 0.358 | 0.251 | 7.58E-43 | preHTC | MT1H     |

|             |          |             |       |       |          |        |           |
|-------------|----------|-------------|-------|-------|----------|--------|-----------|
| SNAI2.2     | 3.93E-47 | -0.27506131 | 0.51  | 0.605 | 9.91E-43 | preHTC | SNAI2     |
| GREM1.4     | 5.09E-47 | -0.47202805 | 0.168 | 0.273 | 1.28E-42 | preHTC | GREM1     |
| SRPX2.3     | 2.78E-46 | 0.263699385 | 0.637 | 0.564 | 7.00E-42 | preHTC | SRPX2     |
| PCSK1N.1    | 3.71E-46 | 0.38898569  | 0.333 | 0.232 | 9.35E-42 | preHTC | PCSK1N    |
| TUBB4B.1    | 5.12E-46 | -0.29168608 | 0.8   | 0.859 | 1.29E-41 | preHTC | TUBB4B    |
| STEAP4.4    | 2.48E-44 | 0.455050499 | 0.162 | 0.091 | 6.24E-40 | preHTC | STEAP4    |
| KCNMA1      | 3.67E-44 | -0.35474436 | 0.593 | 0.67  | 9.26E-40 | preHTC | KCNMA1    |
| SLC20A1.1   | 8.78E-44 | -0.30274226 | 0.568 | 0.637 | 2.21E-39 | preHTC | SLC20A1   |
| PPP1R15A.4  | 1.57E-43 | -0.37020245 | 0.684 | 0.761 | 3.95E-39 | preHTC | PPP1R15A  |
| TMSB4X.4    | 5.94E-43 | -0.38974508 | 0.823 | 0.768 | 1.50E-38 | preHTC | TMSB4X    |
| SERTAD4.2   | 6.28E-43 | -0.25609379 | 0.367 | 0.463 | 1.58E-38 | preHTC | SERTAD4   |
| A2M.2       | 7.96E-43 | -0.25866551 | 0.315 | 0.426 | 2.01E-38 | preHTC | A2M       |
| FAM43A.2    | 2.54E-41 | -0.26677319 | 0.172 | 0.264 | 6.41E-37 | preHTC | FAM43A    |
| TSPAN2.3    | 2.07E-40 | 0.328451042 | 0.725 | 0.71  | 5.22E-36 | preHTC | TSPAN2    |
| THBS1.1     | 2.07E-39 | 0.387564528 | 0.525 | 0.441 | 5.22E-35 | preHTC | THBS1     |
| MT1A.3      | 8.71E-39 | 0.315561414 | 0.502 | 0.401 | 2.19E-34 | preHTC | MT1A      |
| C11orf96.1  | 5.92E-38 | -0.35154896 | 0.407 | 0.492 | 1.49E-33 | preHTC | C11orf96  |
| ANKRD37     | 4.88E-37 | -0.25522368 | 0.39  | 0.479 | 1.23E-32 | preHTC | ANKRD37   |
| SAT1.1      | 6.68E-36 | -0.26347417 | 0.94  | 0.961 | 1.68E-31 | preHTC | SAT1      |
| PIM1.2      | 2.18E-35 | -0.28915779 | 0.246 | 0.338 | 5.48E-31 | preHTC | PIM1      |
| DNAJB1      | 2.34E-30 | -0.27144118 | 0.721 | 0.77  | 5.90E-26 | preHTC | DNAJB1    |
| TPM1.1      | 3.42E-29 | -0.27297704 | 0.265 | 0.343 | 8.62E-25 | preHTC | TPM1      |
| KLF6.3      | 4.65E-29 | -0.33697814 | 0.735 | 0.778 | 1.17E-24 | preHTC | KLF6      |
| SLC29A1.2   | 1.69E-27 | -0.26238648 | 0.766 | 0.805 | 4.25E-23 | preHTC | SLC29A1   |
| TIMP1.3     | 2.13E-24 | 0.574326126 | 0.997 | 0.995 | 5.36E-20 | preHTC | TIMP1     |
| MFGE8.4     | 1.58E-23 | -0.32304003 | 0.939 | 0.945 | 3.98E-19 | preHTC | MFGE8     |
| PDK4.2      | 8.65E-23 | 0.271907269 | 0.32  | 0.247 | 2.18E-18 | preHTC | PDK4      |
| HIST1H1C.1  | 3.90E-20 | -0.25695225 | 0.216 | 0.28  | 9.84E-16 | preHTC | HIST1H1C  |
| SPP1.4      | 5.98E-19 | -2.4831264  | 0.34  | 0.383 | 1.51E-14 | preHTC | SPP1      |
| SAA1.3      | 1.48E-16 | 0.713447001 | 0.129 | 0.088 | 3.74E-12 | preHTC | SAA1      |
| IGFBP6.4    | 1.43E-11 | -0.47432423 | 0.668 | 0.708 | 3.61E-07 | preHTC | IGFBP6    |
| TUBA1A.1    | 6.30E-07 | -0.27864041 | 0.613 | 0.619 | 0.01588  | preHTC | TUBA1A    |
| TMSB10.2    | 0.000867 | -0.32936689 | 0.775 | 0.787 | 1        | preHTC | TMSB10    |
| LGALS1.2    | 0.00157  | -0.27281278 | 0.91  | 0.93  | 1        | preHTC | LGALS1    |
| COL1A1.4    | 0.002728 | -0.86150604 | 0.155 | 0.133 | 1        | preHTC | COL1A1    |
| TNFRSF11B.4 | 0.006528 | 0.310629396 | 0.762 | 0.803 | 1        | preHTC | TNFRSF11B |
| COL1A1.5    | 0        | 2.967778489 | 0.349 | 0.094 | 0        | FC     | COL1A1    |
| TMSB4X.5    | 0        | 2.228556954 | 0.895 | 0.753 | 0        | FC     | TMSB4X    |
| S100A4.5    | 0        | 2.097393182 | 0.778 | 0.584 | 0        | FC     | S100A4    |
| COL1A2.4    | 0        | 1.968509605 | 0.783 | 0.469 | 0        | FC     | COL1A2    |
| CRTAC1.3    | 0        | 1.944758016 | 0.91  | 0.721 | 0        | FC     | CRTAC1    |
| TNFAIP6.5   | 0        | 1.922522453 | 0.511 | 0.14  | 0        | FC     | TNFAIP6   |
| DPT.5       | 0        | 1.816666784 | 0.673 | 0.31  | 0        | FC     | DPT       |
| TGFBI.5     | 0        | 1.79470586  | 0.731 | 0.32  | 0        | FC     | TGFBI     |
| HTRA1.5     | 0        | 1.75250235  | 0.901 | 0.809 | 0        | FC     | HTRA1     |
| TPPP3.3     | 0        | 1.619202495 | 0.506 | 0.223 | 0        | FC     | TPPP3     |
| IGFBP5.4    | 0        | 1.522337681 | 0.429 | 0.188 | 0        | FC     | IGFBP5    |
| ASPN.3      | 0        | 1.503584903 | 0.804 | 0.569 | 0        | FC     | ASPN      |
| COL6A3.3    | 0        | 1.502028898 | 0.738 | 0.535 | 0        | FC     | COL6A3    |
| COL6A1.3    | 0        | 1.450988711 | 0.924 | 0.822 | 0        | FC     | COL6A1    |
| TNC.3       | 0        | 1.389787412 | 0.849 | 0.439 | 0        | FC     | TNC       |
| COL6A2.4    | 0        | 1.315712096 | 0.939 | 0.878 | 0        | FC     | COL6A2    |
| PRSS23.3    | 0        | 1.303060712 | 0.49  | 0.237 | 0        | FC     | PRSS23    |
| AQP1.4      | 0        | 1.285220317 | 0.315 | 0.065 | 0        | FC     | AQP1      |
| CRLF1.5     | 0        | 1.221184398 | 0.489 | 0.197 | 0        | FC     | CRLF1     |
| TNXB.3      | 0        | 1.18603658  | 0.604 | 0.264 | 0        | FC     | TNXB      |
| NBL1.3      | 0        | 1.084731798 | 0.467 | 0.106 | 0        | FC     | NBL1      |
| ISLR.4      | 0        | 1.083545762 | 0.87  | 0.731 | 0        | FC     | ISLR      |
| THY1.5      | 0        | 1.055933939 | 0.538 | 0.169 | 0        | FC     | THY1      |
| ABI3BP.4    | 0        | 1.035093139 | 0.75  | 0.432 | 0        | FC     | ABI3BP    |

|           |   |             |       |       |   |    |         |
|-----------|---|-------------|-------|-------|---|----|---------|
| S100A10.3 | 0 | 0.980037968 | 0.995 | 0.994 | 0 | FC | S100A10 |
| CRIP1.2   | 0 | 0.941839341 | 0.602 | 0.319 | 0 | FC | CRIP1   |
| MMP2      | 0 | 0.938207117 | 0.22  | 0.043 | 0 | FC | MMP2    |
| VCAM1.5   | 0 | 0.88566171  | 0.408 | 0.131 | 0 | FC | VCAM1   |
| TAGLN2.4  | 0 | 0.86033857  | 0.874 | 0.778 | 0 | FC | TAGLN2  |
| MXRA5.2   | 0 | 0.83080122  | 0.478 | 0.187 | 0 | FC | MXRA5   |
| ECM1.3    | 0 | 0.828548355 | 0.449 | 0.093 | 0 | FC | ECM1    |
| ITGB5.1   | 0 | 0.781942734 | 0.541 | 0.246 | 0 | FC | ITGB5   |
| COL15A1.3 | 0 | 0.757992865 | 0.612 | 0.315 | 0 | FC | COL15A1 |
| TREM1.3   | 0 | 0.741643042 | 0.279 | 0.053 | 0 | FC | TREM1   |
| S100A11.3 | 0 | 0.730129224 | 0.97  | 0.963 | 0 | FC | S100A11 |
| SMOC1.3   | 0 | 0.729113901 | 0.68  | 0.442 | 0 | FC | SMOC1   |
| CAPZB.3   | 0 | 0.726803327 | 0.776 | 0.614 | 0 | FC | CAPZB   |
| FAP.3     | 0 | 0.724556727 | 0.583 | 0.245 | 0 | FC | FAP     |
| PPAP2B.3  | 0 | 0.717102971 | 0.467 | 0.185 | 0 | FC | PPAP2B  |
| CCND1.2   | 0 | 0.716650053 | 0.402 | 0.1   | 0 | FC | CCND1   |
| PFN1.2    | 0 | 0.686349761 | 0.923 | 0.88  | 0 | FC | PFN1    |
| CRABP2    | 0 | 0.648752401 | 0.205 | 0.039 | 0 | FC | CRABP2  |
| ARPC1B.2  | 0 | 0.646181415 | 0.761 | 0.592 | 0 | FC | ARPC1B  |
| HSD3B7.1  | 0 | 0.64602633  | 0.387 | 0.101 | 0 | FC | HSD3B7  |
| TXN.2     | 0 | 0.642718068 | 0.925 | 0.873 | 0 | FC | TXN     |
| IFITM3.5  | 0 | 0.632507861 | 0.991 | 0.968 | 0 | FC | IFITM3  |
| PLAUR.4   | 0 | 0.625019695 | 0.559 | 0.289 | 0 | FC | PLAUR   |
| GJA1.2    | 0 | 0.621908164 | 0.542 | 0.22  | 0 | FC | GJA1    |
| ATP5E.2   | 0 | 0.612857446 | 0.96  | 0.956 | 0 | FC | ATP5E   |
| CLIC1     | 0 | 0.568154946 | 0.911 | 0.867 | 0 | FC | CLIC1   |
| PDLIM7.2  | 0 | 0.531181082 | 0.528 | 0.279 | 0 | FC | PDLIM7  |
| P4HA3.1   | 0 | 0.523927983 | 0.447 | 0.137 | 0 | FC | P4HA3   |
| TMEM100.1 | 0 | 0.504602933 | 0.409 | 0.151 | 0 | FC | TMEM100 |
| F5.1      | 0 | 0.448700002 | 0.372 | 0.117 | 0 | FC | F5      |
| SEMA3C    | 0 | 0.440574162 | 0.294 | 0.069 | 0 | FC | SEMA3C  |
| MAP1A     | 0 | 0.413262077 | 0.338 | 0.096 | 0 | FC | MAP1A   |
| GPNMB     | 0 | 0.41006059  | 0.168 | 0.018 | 0 | FC | GPNMB   |
| MGST1     | 0 | 0.400122281 | 0.262 | 0.066 | 0 | FC | MGST1   |
| CDH13     | 0 | 0.3852469   | 0.283 | 0.055 | 0 | FC | CDH13   |
| MAMDC2    | 0 | 0.335968435 | 0.261 | 0.042 | 0 | FC | MAMDC2  |
| KCNN4     | 0 | 0.330599437 | 0.251 | 0.065 | 0 | FC | KCNN4   |
| ZEB2      | 0 | 0.314928833 | 0.254 | 0.037 | 0 | FC | ZEB2    |
| DLX4      | 0 | 0.309560749 | 0.238 | 0.039 | 0 | FC | DLX4    |
| ANPEP     | 0 | 0.297183901 | 0.184 | 0.016 | 0 | FC | ANPEP   |
| BMP4      | 0 | 0.292922457 | 0.195 | 0.025 | 0 | FC | BMP4    |
| LRRC15    | 0 | 0.277939729 | 0.16  | 0.011 | 0 | FC | LRRC15  |
| FAM180A   | 0 | 0.262391128 | 0.179 | 0.03  | 0 | FC | FAM180A |
| FOXA3.3   | 0 | -0.60881062 | 0.157 | 0.482 | 0 | FC | FOXA3   |
| DCN       | 0 | -0.6216593  | 1     | 1     | 0 | FC | DCN     |
| MST4.4    | 0 | -0.63215662 | 0.315 | 0.633 | 0 | FC | MST4    |
| TSC22D1.3 | 0 | -0.65811283 | 0.915 | 0.986 | 0 | FC | TSC22D1 |
| NDRG2.4   | 0 | -0.66328842 | 0.428 | 0.733 | 0 | FC | NDRG2   |
| STK38L.4  | 0 | -0.7443434  | 0.475 | 0.721 | 0 | FC | STK38L  |
| CFH.4     | 0 | -0.76479035 | 0.862 | 0.964 | 0 | FC | CFH     |
| APOD.4    | 0 | -0.82096548 | 0.515 | 0.809 | 0 | FC | APOD    |
| WWP2.4    | 0 | -0.82884033 | 0.631 | 0.878 | 0 | FC | WWP2    |
| GDF10.4   | 0 | -0.85040688 | 0.349 | 0.696 | 0 | FC | GDF10   |
| COL11A2.4 | 0 | -0.86077392 | 0.43  | 0.814 | 0 | FC | COL11A2 |
| TUBB2B.4  | 0 | -0.91614025 | 0.298 | 0.694 | 0 | FC | TUBB2B  |
| SMOC2.4   | 0 | -0.91633501 | 0.794 | 0.928 | 0 | FC | SMOC2   |
| FBXO2.5   | 0 | -0.92489869 | 0.666 | 0.911 | 0 | FC | FBXO2   |
| ITM2C.4   | 0 | -0.97578496 | 0.842 | 0.962 | 0 | FC | ITM2C   |
| MDFI.4    | 0 | -0.99960087 | 0.392 | 0.769 | 0 | FC | MDFI    |
| ITM2A.4   | 0 | -1.00301565 | 0.394 | 0.759 | 0 | FC | ITM2A   |

|            |           |             |       |       |           |    |          |
|------------|-----------|-------------|-------|-------|-----------|----|----------|
| SPINT2.4   | 0         | -1.01233646 | 0.707 | 0.943 | 0         | FC | SPINT2   |
| MIA.3      | 0         | -1.02625552 | 0.869 | 0.979 | 0         | FC | MIA      |
| CYR61.5    | 0         | -1.11901536 | 0.896 | 0.95  | 0         | FC | CYR61    |
| SERPINA5.5 | 0         | -1.17120211 | 0.653 | 0.883 | 0         | FC | SERPINA5 |
| COL9A2.4   | 0         | -1.17120635 | 0.375 | 0.757 | 0         | FC | COL9A2   |
| JUNB.4     | 0         | -1.17416198 | 0.984 | 0.996 | 0         | FC | JUNB     |
| HAPLN1.4   | 0         | -1.21173484 | 0.829 | 0.975 | 0         | FC | HAPLN1   |
| MATN3.5    | 0         | -1.212713   | 0.259 | 0.616 | 0         | FC | MATN3    |
| STC2.4     | 0         | -1.24795444 | 0.145 | 0.495 | 0         | FC | STC2     |
| SERPINA1.4 | 0         | -1.26329668 | 0.874 | 0.986 | 0         | FC | SERPINA1 |
| S100B.4    | 0         | -1.26988712 | 0.752 | 0.967 | 0         | FC | S100B    |
| RASD1.5    | 0         | -1.31543166 | 0.411 | 0.686 | 0         | FC | RASD1    |
| S100A1.4   | 0         | -1.32969775 | 0.675 | 0.939 | 0         | FC | S100A1   |
| COL9A3.4   | 0         | -1.3337927  | 0.671 | 0.945 | 0         | FC | COL9A3   |
| COL2A1.3   | 0         | -1.36047404 | 0.87  | 0.944 | 0         | FC | COL2A1   |
| SCRG1.5    | 0         | -1.37367696 | 0.981 | 0.996 | 0         | FC | SCRG1    |
| LECT1.5    | 0         | -1.46863188 | 0.15  | 0.544 | 0         | FC | LECT1    |
| ACAN.4     | 0         | -1.50890458 | 0.88  | 0.986 | 0         | FC | ACAN     |
| C2orf40.3  | 0         | -1.80761577 | 0.997 | 1     | 0         | FC | C2orf40  |
| TF.4       | 0         | -1.81240181 | 0.244 | 0.59  | 0         | FC | TF       |
| FRZB.4     | 0         | -1.95403588 | 0.556 | 0.871 | 0         | FC | FRZB     |
| FGFBP2.3   | 0         | -2.08324862 | 0.888 | 0.975 | 0         | FC | FGFBP2   |
| CHAD.5     | 0         | -2.17318888 | 0.606 | 0.92  | 0         | FC | CHAD     |
| C2orf82.5  | 0         | -2.23791229 | 0.805 | 0.976 | 0         | FC | C2orf82  |
| CYTL1.5    | 0         | -2.29172718 | 0.735 | 0.928 | 0         | FC | CYTL1    |
| CLEC3A.5   | 0         | -2.80257428 | 0.458 | 0.807 | 0         | FC | CLEC3A   |
| CERCAM     | 2.98E-307 | 0.554468044 | 0.426 | 0.191 | 7.51E-303 | FC | CERCAM   |
| S100A6.2   | 7.17E-307 | 0.86399737  | 0.999 | 1     | 1.81E-302 | FC | S100A6   |
| NTN1.3     | 2.12E-304 | 0.412263047 | 0.384 | 0.147 | 5.35E-300 | FC | NTN1     |
| PRKCDBP.1  | 9.68E-304 | 0.624269327 | 0.853 | 0.755 | 2.44E-299 | FC | PRKCDBP  |
| SCIN.3     | 3.32E-301 | -0.51102308 | 0.252 | 0.563 | 8.36E-297 | FC | SCIN     |
| SORBS2     | 1.14E-299 | 0.400728027 | 0.375 | 0.148 | 2.87E-295 | FC | SORBS2   |
| CD151.2    | 9.84E-299 | 0.687202038 | 0.885 | 0.83  | 2.48E-294 | FC | CD151    |
| TRPV4.4    | 2.60E-296 | -0.54418934 | 0.474 | 0.749 | 6.55E-292 | FC | TRPV4    |
| MINOS1.1   | 5.19E-296 | 0.593983853 | 0.861 | 0.772 | 1.31E-291 | FC | MINOS1   |
| LTBP2.3    | 5.39E-296 | 0.589854834 | 0.601 | 0.337 | 1.36E-291 | FC | LTBP2    |
| ANGPTL1    | 1.13E-293 | 0.340180319 | 0.304 | 0.1   | 2.84E-289 | FC | ANGPTL1  |
| RPL28.2    | 2.47E-293 | 0.344364652 | 1     | 0.999 | 6.22E-289 | FC | RPL28    |
| GPX3.5     | 5.56E-290 | -0.76398059 | 0.975 | 0.992 | 1.40E-285 | FC | GPX3     |
| PDPN.3     | 1.13E-288 | -1.0477102  | 0.636 | 0.795 | 2.85E-284 | FC | PDPN     |
| IGFBP4.2   | 5.14E-288 | 0.66154664  | 0.386 | 0.159 | 1.29E-283 | FC | IGFBP4   |
| FXYD1.4    | 2.40E-284 | -0.8291553  | 0.618 | 0.771 | 6.06E-280 | FC | FXYD1    |
| SEPW1.1    | 3.97E-284 | 0.489612913 | 0.86  | 0.763 | 1.00E-279 | FC | SEPW1    |
| CLU.5      | 3.44E-283 | 0.734966575 | 1     | 1     | 8.67E-279 | FC | CLU      |
| TSPAN6.2   | 1.57E-282 | -0.53331165 | 0.531 | 0.761 | 3.96E-278 | FC | TSPAN6   |
| PTGES.3    | 2.97E-281 | 0.904761127 | 0.566 | 0.334 | 7.48E-277 | FC | PTGES    |
| COL8A1     | 3.60E-281 | 0.353074614 | 0.148 | 0.024 | 9.07E-277 | FC | COL8A1   |
| FSTL1.3    | 5.45E-281 | 0.824832619 | 0.789 | 0.642 | 1.37E-276 | FC | FSTL1    |
| THBS3.3    | 1.46E-279 | 0.502538802 | 0.557 | 0.3   | 3.68E-275 | FC | THBS3    |
| PRG4.4     | 1.65E-274 | 3.234108686 | 0.558 | 0.352 | 4.16E-270 | FC | PRG4     |
| TCF4.3     | 6.67E-274 | 0.560311009 | 0.747 | 0.567 | 1.68E-269 | FC | TCF4     |
| BTG2.5     | 2.93E-273 | -1.00550093 | 0.565 | 0.761 | 7.37E-269 | FC | BTG2     |
| SLC14A1.3  | 3.10E-273 | -0.62484694 | 0.164 | 0.47  | 7.80E-269 | FC | SLC14A1  |
| MGST3.2    | 7.18E-273 | 0.705229532 | 0.871 | 0.802 | 1.81E-268 | FC | MGST3    |
| ABHD2      | 2.66E-270 | 0.515993906 | 0.449 | 0.222 | 6.70E-266 | FC | ABHD2    |
| DEFB1      | 4.69E-270 | 0.636605495 | 0.191 | 0.044 | 1.18E-265 | FC | DEFB1    |
| SH3BGRL3.2 | 6.56E-268 | 0.80025765  | 0.964 | 0.968 | 1.65E-263 | FC | SH3BGRL3 |
| HHIP       | 1.08E-267 | 0.367302893 | 0.198 | 0.048 | 2.72E-263 | FC | HHIP     |
| NT5E.3     | 1.84E-263 | 0.588397602 | 0.656 | 0.444 | 4.64E-259 | FC | NT5E     |
| PPP1R3C.4  | 3.01E-261 | -0.89679236 | 0.526 | 0.732 | 7.59E-257 | FC | PPP1R3C  |

|             |           |             |       |       |           |    |           |
|-------------|-----------|-------------|-------|-------|-----------|----|-----------|
| C10orf105.1 | 5.48E-258 | 0.390518551 | 0.379 | 0.164 | 1.38E-253 | FC | C10orf105 |
| IER2.5      | 1.75E-257 | -1.126049   | 0.786 | 0.887 | 4.42E-253 | FC | IER2      |
| COL14A1     | 1.85E-256 | 0.556537677 | 0.222 | 0.062 | 4.67E-252 | FC | COL14A1   |
| PCOLCE.4    | 7.76E-256 | 0.770516772 | 0.913 | 0.814 | 1.96E-251 | FC | PCOLCE    |
| NTN4        | 5.96E-252 | 0.382760984 | 0.396 | 0.176 | 1.50E-247 | FC | NTN4      |
| LDLRAD4.4   | 2.38E-250 | -0.59254594 | 0.436 | 0.652 | 6.01E-246 | FC | LDLRAD4   |
| C1R.5       | 1.10E-249 | 0.835595457 | 0.814 | 0.646 | 2.77E-245 | FC | C1R       |
| PMP22.3     | 2.18E-249 | 0.508373485 | 0.941 | 0.888 | 5.50E-245 | FC | PMP22     |
| POLR2L.1    | 4.28E-245 | 0.496823621 | 0.919 | 0.877 | 1.08E-240 | FC | POLR2L    |
| TIMP2.2     | 1.64E-244 | 0.711586143 | 0.812 | 0.712 | 4.14E-240 | FC | TIMP2     |
| GEM.4       | 1.74E-244 | -0.77183768 | 0.649 | 0.829 | 4.37E-240 | FC | GEM       |
| APLP2       | 3.70E-244 | 0.482483998 | 0.855 | 0.741 | 9.33E-240 | FC | APLP2     |
| COL11A1.2   | 8.40E-244 | -0.56396884 | 0.618 | 0.84  | 2.12E-239 | FC | COL11A1   |
| CRISPLD1.4  | 3.92E-240 | -1.35045443 | 0.312 | 0.547 | 9.87E-236 | FC | CRISPLD1  |
| ADAMTS5.3   | 1.60E-239 | 0.386718604 | 0.293 | 0.106 | 4.04E-235 | FC | ADAMTS5   |
| COL3A1.5    | 3.03E-237 | 1.069645588 | 0.875 | 0.762 | 7.63E-233 | FC | COL3A1    |
| S100A13.3   | 3.54E-237 | -0.43255765 | 0.954 | 0.981 | 8.92E-233 | FC | S100A13   |
| GPC6.2      | 6.57E-237 | -0.47408918 | 0.55  | 0.776 | 1.65E-232 | FC | GPC6      |
| PHOSPHO1.3  | 9.44E-237 | -0.44098511 | 0.025 | 0.253 | 2.38E-232 | FC | PHOSPHO1  |
| DPYSL2      | 1.64E-236 | 0.434968877 | 0.546 | 0.324 | 4.13E-232 | FC | DPYSL2    |
| PCOLCE2.3   | 1.79E-236 | -0.50687109 | 0.947 | 0.98  | 4.51E-232 | FC | PCOLCE2   |
| SSC5D       | 1.79E-236 | 0.312634336 | 0.341 | 0.142 | 4.51E-232 | FC | SSC5D     |
| TTLL7.4     | 1.95E-236 | -0.44452321 | 0.167 | 0.428 | 4.92E-232 | FC | TTLL7     |
| TSPAN13.3   | 2.65E-235 | -0.60805001 | 0.136 | 0.388 | 6.69E-231 | FC | TSPAN13   |
| WIF1.4      | 8.39E-235 | -0.62556868 | 0.046 | 0.284 | 2.11E-230 | FC | WIF1      |
| CD63.3      | 7.63E-234 | 0.369855773 | 0.997 | 0.998 | 1.92E-229 | FC | CD63      |
| ACKR3.1     | 1.78E-233 | 0.503610397 | 0.413 | 0.199 | 4.48E-229 | FC | ACKR3     |
| FAM134B.4   | 2.00E-229 | 0.455610045 | 0.64  | 0.42  | 5.03E-225 | FC | FAM134B   |
| COL5A1.5    | 2.79E-229 | 0.727840221 | 0.701 | 0.497 | 7.03E-225 | FC | COL5A1    |
| PTPRD       | 9.55E-229 | 0.340260874 | 0.402 | 0.192 | 2.41E-224 | FC | PTPRD     |
| EGR1.5      | 1.35E-226 | -0.73912008 | 0.853 | 0.928 | 3.40E-222 | FC | EGR1      |
| RBP4.5      | 2.00E-226 | -1.05492697 | 0.551 | 0.737 | 5.05E-222 | FC | RBP4      |
| ODF3B       | 1.15E-225 | 0.258487181 | 0.311 | 0.121 | 2.89E-221 | FC | ODF3B     |
| MT-ATP6.2   | 1.80E-225 | 0.5153781   | 0.962 | 0.948 | 4.53E-221 | FC | MT-ATP6   |
| ITGB8.1     | 6.13E-225 | 0.348131014 | 0.283 | 0.103 | 1.55E-220 | FC | ITGB8     |
| IFITM2.5    | 1.34E-224 | 0.556517912 | 0.926 | 0.814 | 3.38E-220 | FC | IFITM2    |
| EXTL1.3     | 3.88E-224 | -0.33378897 | 0.044 | 0.275 | 9.77E-220 | FC | EXTL1     |
| MT-ND2.2    | 2.22E-223 | 0.460879517 | 0.958 | 0.949 | 5.60E-219 | FC | MT-ND2    |
| LGALS1.3    | 2.38E-222 | 1.351803778 | 0.94  | 0.925 | 6.00E-218 | FC | LGALS1    |
| CAPS.3      | 2.56E-222 | 0.591517273 | 0.568 | 0.364 | 6.45E-218 | FC | CAPS      |
| INSIG1.4    | 5.94E-222 | -0.69210546 | 0.301 | 0.539 | 1.50E-217 | FC | INSIG1    |
| FRMD6       | 1.48E-221 | 0.250044521 | 0.249 | 0.084 | 3.73E-217 | FC | FRMD6     |
| JUN.3       | 8.11E-218 | -0.84477084 | 0.875 | 0.936 | 2.04E-213 | FC | JUN       |
| MRC2.2      | 7.24E-217 | 0.510306697 | 0.688 | 0.511 | 1.82E-212 | FC | MRC2      |
| SRSF5.1     | 7.45E-217 | -0.37856696 | 0.962 | 0.989 | 1.88E-212 | FC | SRSF5     |
| SH3BP5      | 8.66E-217 | 0.380042968 | 0.515 | 0.292 | 2.18E-212 | FC | SH3BP5    |
| FOS.4       | 6.29E-216 | -0.84663289 | 0.962 | 0.983 | 1.59E-211 | FC | FOS       |
| GLIPR1.3    | 7.18E-215 | -0.51387219 | 0.475 | 0.682 | 1.81E-210 | FC | GLIPR1    |
| PDGFRA      | 2.96E-214 | 0.428731146 | 0.464 | 0.254 | 7.47E-210 | FC | PDGFRA    |
| MIR24-2.2   | 2.14E-213 | -0.63199308 | 0.501 | 0.726 | 5.39E-209 | FC | MIR24-2   |
| CHRDL2.4    | 2.38E-211 | -1.20012271 | 0.075 | 0.3   | 5.99E-207 | FC | CHRDL2    |
| ANTXR1      | 2.93E-211 | 0.384515382 | 0.394 | 0.195 | 7.39E-207 | FC | ANTXR1    |
| MGP.1       | 4.74E-211 | -0.55738604 | 1     | 1     | 1.19E-206 | FC | MGP       |
| DKK3.3      | 1.36E-207 | 0.753434563 | 0.582 | 0.396 | 3.43E-203 | FC | DKK3      |
| BHLHE40.4   | 4.33E-207 | -0.75629921 | 0.689 | 0.819 | 1.09E-202 | FC | BHLHE40   |
| FXYD6.3     | 6.68E-207 | -0.4957328  | 0.801 | 0.889 | 1.68E-202 | FC | FXYD6     |
| AHNAK       | 1.43E-206 | 0.516474268 | 0.87  | 0.802 | 3.60E-202 | FC | AHNAK     |
| MCL1.2      | 8.10E-206 | -0.4927858  | 0.766 | 0.873 | 2.04E-201 | FC | MCL1      |
| FOSB.3      | 1.15E-205 | -0.81271483 | 0.765 | 0.87  | 2.90E-201 | FC | FOSB      |
| MIR497HG.1  | 6.70E-205 | -0.34825804 | 0.215 | 0.473 | 1.69E-200 | FC | MIR497HG  |



|              |           |             |       |       |           |    |            |
|--------------|-----------|-------------|-------|-------|-----------|----|------------|
| SULF1        | 1.61E-204 | 0.290541827 | 0.299 | 0.12  | 4.06E-200 | FC | SULF1      |
| PHACTR2      | 5.35E-204 | 0.34654783  | 0.44  | 0.235 | 1.35E-199 | FC | PHACTR2    |
| TOMM7        | 4.38E-203 | -0.27591023 | 0.996 | 0.998 | 1.10E-198 | FC | TOMM7      |
| LUM.3        | 6.72E-201 | 0.617421016 | 0.999 | 0.999 | 1.69E-196 | FC | LUM        |
| BHLHE41.3    | 1.84E-200 | -0.5212391  | 0.417 | 0.639 | 4.63E-196 | FC | BHLHE41    |
| SNHG8.2      | 1.62E-198 | -0.40570936 | 0.85  | 0.945 | 4.09E-194 | FC | SNHG8      |
| RAB31        | 1.98E-198 | 0.351112212 | 0.308 | 0.134 | 4.98E-194 | FC | RAB31      |
| BLOC1S1      | 4.67E-198 | 0.423170685 | 0.561 | 0.369 | 1.18E-193 | FC | BLOC1S1    |
| ATF3.5       | 1.19E-197 | -0.74572678 | 0.396 | 0.625 | 3.00E-193 | FC | ATF3       |
| ABRACL       | 1.38E-197 | 0.276027407 | 0.355 | 0.165 | 3.47E-193 | FC | ABRACL     |
| ITGB1.2      | 3.71E-197 | 0.486582916 | 0.845 | 0.78  | 9.34E-193 | FC | ITGB1      |
| FN1.5        | 2.27E-195 | 0.940803131 | 0.999 | 0.999 | 5.71E-191 | FC | FN1        |
| IGF1         | 7.96E-195 | 0.609062478 | 0.112 | 0.02  | 2.01E-190 | FC | IGF1       |
| CD68.2       | 1.56E-194 | 0.434417554 | 0.586 | 0.396 | 3.94E-190 | FC | CD68       |
| ZFP36.4      | 4.04E-194 | -0.68814248 | 0.909 | 0.966 | 1.02E-189 | FC | ZFP36      |
| HMGB1        | 4.37E-194 | 0.387294474 | 0.974 | 0.967 | 1.10E-189 | FC | HMGB1      |
| AC005152.3.2 | 6.11E-194 | -0.43287027 | 0.059 | 0.271 | 1.54E-189 | FC | AC005152.3 |
| NR4A1.5      | 1.50E-193 | -0.76155984 | 0.42  | 0.628 | 3.77E-189 | FC | NR4A1      |
| IDI1.3       | 6.85E-192 | -0.5266426  | 0.415 | 0.624 | 1.73E-187 | FC | IDI1       |
| MT-CYB.2     | 7.37E-192 | 0.498199163 | 0.96  | 0.944 | 1.86E-187 | FC | MT-CYB     |
| COL9A1.5     | 3.02E-191 | -0.56281257 | 0.065 | 0.278 | 7.60E-187 | FC | COL9A1     |
| NRN1.2       | 3.19E-191 | -0.46928153 | 0.757 | 0.886 | 8.03E-187 | FC | NRN1       |
| LTBP3.1      | 1.01E-190 | 0.475077109 | 0.667 | 0.499 | 2.55E-186 | FC | LTBP3      |
| PLP2.2       | 1.83E-190 | 0.513390102 | 0.901 | 0.877 | 4.60E-186 | FC | PLP2       |
| ANXA2.1      | 4.15E-189 | 0.551459808 | 0.984 | 0.981 | 1.05E-184 | FC | ANXA2      |
| SPTSSB.3     | 1.71E-188 | -0.4005158  | 0.031 | 0.227 | 4.31E-184 | FC | SPTSSB     |
| NDUFB2       | 2.62E-187 | 0.42009635  | 0.867 | 0.824 | 6.59E-183 | FC | NDUFB2     |
| PLEKHB1.1    | 4.11E-187 | -0.26614504 | 0.054 | 0.259 | 1.04E-182 | FC | PLEKHB1    |
| PLAC9.3      | 5.14E-187 | -0.63876246 | 0.951 | 0.976 | 1.29E-182 | FC | PLAC9      |
| VIM.1        | 1.23E-186 | 0.519004225 | 1     | 1     | 3.10E-182 | FC | VIM        |
| CFD          | 1.63E-185 | 0.819542135 | 0.144 | 0.035 | 4.10E-181 | FC | CFD        |
| HCFC1R1.3    | 9.50E-183 | 0.49248445  | 0.752 | 0.611 | 2.39E-178 | FC | HCFC1R1    |
| ENHO         | 1.30E-182 | -0.27508218 | 0.025 | 0.213 | 3.29E-178 | FC | ENHO       |
| TMEM50A      | 6.92E-182 | 0.439298248 | 0.674 | 0.535 | 1.74E-177 | FC | TMEM50A    |
| ADRB2.2      | 9.15E-182 | -0.42853996 | 0.22  | 0.447 | 2.30E-177 | FC | ADRB2      |
| SOX9.2       | 1.27E-181 | -0.46771182 | 0.564 | 0.757 | 3.19E-177 | FC | SOX9       |
| MAN1A1       | 2.29E-181 | 0.256531929 | 0.33  | 0.152 | 5.76E-177 | FC | MAN1A1     |
| SIPA1L2      | 2.64E-181 | 0.264060707 | 0.345 | 0.164 | 6.66E-177 | FC | SIPA1L2    |
| ATP6AP2      | 3.89E-181 | 0.415180554 | 0.749 | 0.625 | 9.79E-177 | FC | ATP6AP2    |
| DYNC111      | 4.20E-181 | -0.28505511 | 0.109 | 0.334 | 1.06E-176 | FC | DYNC111    |
| CALD1.3      | 1.81E-179 | 0.47565606  | 0.842 | 0.772 | 4.57E-175 | FC | CALD1      |
| CHI3L2.5     | 8.20E-179 | 0.895437293 | 0.928 | 0.874 | 2.07E-174 | FC | CHI3L2     |
| SERPINI1.3   | 4.96E-178 | -0.45017504 | 0.19  | 0.414 | 1.25E-173 | FC | SERPINI1   |
| SERPINF1     | 1.76E-177 | 0.509541721 | 0.107 | 0.02  | 4.43E-173 | FC | SERPINF1   |
| CNIH1.2      | 2.10E-177 | 0.44359629  | 0.758 | 0.669 | 5.30E-173 | FC | CNIH1      |
| ARL6IP5      | 1.59E-176 | 0.389554858 | 0.936 | 0.924 | 4.00E-172 | FC | ARL6IP5    |
| NUPR1L.1     | 3.88E-175 | -0.26370996 | 0.066 | 0.27  | 9.78E-171 | FC | NUPR1L     |
| DKK1.4       | 2.82E-174 | -0.64440312 | 0.032 | 0.215 | 7.10E-170 | FC | DKK1       |
| SDC2.4       | 6.44E-174 | -0.38306634 | 0.933 | 0.965 | 1.62E-169 | FC | SDC2       |
| NPM1         | 8.65E-174 | -0.27875061 | 0.989 | 0.996 | 2.18E-169 | FC | NPM1       |
| NRP2.2       | 1.60E-173 | 0.369710239 | 0.487 | 0.288 | 4.03E-169 | FC | NRP2       |
| LGI4.2       | 3.09E-173 | -0.3201785  | 0.058 | 0.257 | 7.79E-169 | FC | LGI4       |
| CD109.1      | 4.43E-173 | 0.436334953 | 0.593 | 0.427 | 1.12E-168 | FC | CD109      |
| SPARCL1      | 1.33E-172 | 0.601403729 | 0.127 | 0.029 | 3.35E-168 | FC | SPARCL1    |
| NDUFS5       | 3.68E-172 | 0.375186825 | 0.922 | 0.899 | 9.28E-168 | FC | NDUFS5     |
| PAPSS2.2     | 3.23E-171 | -0.41254178 | 0.659 | 0.81  | 8.13E-167 | FC | PAPSS2     |
| NR1D1.4      | 9.68E-171 | -0.52671479 | 0.548 | 0.715 | 2.44E-166 | FC | NR1D1      |
| RPS27L       | 5.84E-170 | 0.4631101   | 0.924 | 0.901 | 1.47E-165 | FC | RPS27L     |
| ORMDL3       | 3.08E-169 | -0.3482575  | 0.39  | 0.607 | 7.76E-165 | FC | ORMDL3     |
| MT-ND3.2     | 6.84E-169 | 0.478981491 | 0.952 | 0.933 | 1.72E-164 | FC | MT-ND3     |

|                 |           |             |       |       |           |    |               |
|-----------------|-----------|-------------|-------|-------|-----------|----|---------------|
| CILP.3          | 1.26E-168 | -0.77543302 | 0.868 | 0.92  | 3.19E-164 | FC | CILP          |
| RP11-983P16.4.3 | 1.84E-168 | -0.34724246 | 0.357 | 0.59  | 4.64E-164 | FC | RP11-983P16.4 |
| MT-CO2.3        | 2.93E-167 | 0.482236474 | 0.959 | 0.948 | 7.37E-163 | FC | MT-CO2        |
| DYNLL1          | 2.94E-167 | 0.369823119 | 0.954 | 0.947 | 7.41E-163 | FC | DYNLL1        |
| NFATC1.2        | 5.13E-167 | -0.4570028  | 0.395 | 0.598 | 1.29E-162 | FC | NFATC1        |
| ADAMTS6.1       | 1.46E-166 | 0.576026705 | 0.554 | 0.389 | 3.67E-162 | FC | ADAMTS6       |
| EMP3.2          | 2.41E-166 | 0.799846531 | 0.932 | 0.925 | 6.07E-162 | FC | EMP3          |
| CTA-29F11.1.3   | 6.06E-166 | -0.37290175 | 0.208 | 0.431 | 1.53E-161 | FC | CTA-29F11.1   |
| CUX1            | 7.64E-165 | 0.300111574 | 0.493 | 0.302 | 1.92E-160 | FC | CUX1          |
| PART1.3         | 6.52E-164 | 0.50779455  | 0.597 | 0.408 | 1.64E-159 | FC | PART1         |
| CD81.1          | 1.24E-163 | 0.488050192 | 0.697 | 0.557 | 3.12E-159 | FC | CD81          |
| CNN2.2          | 2.17E-163 | -0.32867523 | 0.146 | 0.359 | 5.46E-159 | FC | CNN2          |
| PLTP            | 3.08E-163 | 0.379777634 | 0.283 | 0.128 | 7.76E-159 | FC | PLTP          |
| CRIP2.1         | 4.03E-163 | 0.495661783 | 0.833 | 0.775 | 1.02E-158 | FC | CRIP2         |
| PRKCZ           | 1.71E-160 | -0.33960249 | 0.48  | 0.685 | 4.31E-156 | FC | PRKCZ         |
| SETD5-AS1.2     | 1.35E-159 | -0.37229888 | 0.508 | 0.718 | 3.40E-155 | FC | SETD5-AS1     |
| GADD45B.5       | 5.64E-159 | -0.81384241 | 0.875 | 0.929 | 1.42E-154 | FC | GADD45B       |
| LDLR.3          | 7.51E-159 | -0.43915102 | 0.222 | 0.431 | 1.89E-154 | FC | LDLR          |
| IFITM10.1       | 4.55E-158 | -0.37052681 | 0.325 | 0.535 | 1.15E-153 | FC | IFITM10       |
| COX6B1          | 9.07E-158 | 0.321749765 | 0.926 | 0.912 | 2.29E-153 | FC | COX6B1        |
| CDKN1A.4        | 2.14E-157 | -0.48836727 | 0.73  | 0.858 | 5.38E-153 | FC | CDKN1A        |
| EZR             | 2.37E-157 | 0.399337942 | 0.365 | 0.196 | 5.98E-153 | FC | EZR           |
| CD55.4          | 2.03E-156 | 1.455537958 | 0.77  | 0.713 | 5.11E-152 | FC | CD55          |
| SRSF7.2         | 2.73E-156 | -0.54829736 | 0.783 | 0.874 | 6.87E-152 | FC | SRSF7         |
| TCEAL2.1        | 4.78E-155 | -0.31260825 | 0.583 | 0.811 | 1.20E-150 | FC | TCEAL2        |
| MYL12B          | 1.80E-154 | 0.396195999 | 0.914 | 0.888 | 4.53E-150 | FC | MYL12B        |
| C10orf54.1      | 2.81E-152 | 0.392313446 | 0.63  | 0.47  | 7.08E-148 | FC | C10orf54      |
| SCARA3.3        | 3.55E-152 | 0.446861051 | 0.706 | 0.563 | 8.95E-148 | FC | SCARA3        |
| HSPG2.1         | 7.28E-152 | 0.380042116 | 0.534 | 0.362 | 1.83E-147 | FC | HSPG2         |
| METTL7A.3       | 7.74E-152 | -0.38034629 | 0.328 | 0.553 | 1.95E-147 | FC | METTL7A       |
| SLC44A2.2       | 1.85E-151 | -0.32016481 | 0.282 | 0.495 | 4.66E-147 | FC | SLC44A2       |
| ENG             | 7.31E-151 | 0.307402994 | 0.457 | 0.278 | 1.84E-146 | FC | ENG           |
| GYPC            | 3.54E-150 | 0.350209789 | 0.539 | 0.367 | 8.93E-146 | FC | GYPC          |
| COL8A2          | 5.39E-149 | 0.269780769 | 0.354 | 0.189 | 1.36E-144 | FC | COL8A2        |
| CFI             | 1.25E-148 | 0.29041468  | 0.283 | 0.13  | 3.16E-144 | FC | CFI           |
| NINJ1           | 1.66E-148 | -0.34710927 | 0.617 | 0.8   | 4.18E-144 | FC | NINJ1         |
| RPLP0.2         | 8.31E-148 | 0.258102901 | 1     | 1     | 2.09E-143 | FC | RPLP0         |
| LTBP1.2         | 1.75E-147 | 0.479477261 | 0.525 | 0.366 | 4.41E-143 | FC | LTBP1         |
| CIRBP           | 9.09E-147 | -0.26953037 | 0.98  | 0.995 | 2.29E-142 | FC | CIRBP         |
| ATL3            | 3.11E-146 | 0.297712664 | 0.408 | 0.237 | 7.84E-142 | FC | ATL3          |
| PTMA.1          | 5.71E-146 | 0.273822791 | 1     | 0.999 | 1.44E-141 | FC | PTMA          |
| DYSF            | 2.34E-145 | 0.25732415  | 0.21  | 0.082 | 5.88E-141 | FC | DYSF          |
| CD276           | 1.58E-144 | 0.262668515 | 0.356 | 0.192 | 3.97E-140 | FC | CD276         |
| DDIT3.2         | 3.18E-142 | -0.47611831 | 0.621 | 0.769 | 8.02E-138 | FC | DDIT3         |
| AXL             | 5.25E-142 | 0.358379026 | 0.457 | 0.288 | 1.32E-137 | FC | AXL           |
| PSD3            | 9.93E-142 | 0.348201447 | 0.577 | 0.417 | 2.50E-137 | FC | PSD3          |
| SGCA            | 1.09E-141 | 0.279440775 | 0.228 | 0.096 | 2.74E-137 | FC | SGCA          |
| BEX4            | 1.57E-141 | -0.30514164 | 0.526 | 0.735 | 3.94E-137 | FC | BEX4          |
| DLX5.3          | 1.41E-140 | -0.39730597 | 0.315 | 0.526 | 3.56E-136 | FC | DLX5          |
| ANXA4.2         | 2.62E-140 | 0.476407309 | 0.673 | 0.543 | 6.60E-136 | FC | ANXA4         |
| LMAN1.1         | 3.09E-140 | 0.366632763 | 0.695 | 0.587 | 7.78E-136 | FC | LMAN1         |
| ACTG1.4         | 7.97E-140 | -0.44964959 | 0.988 | 0.996 | 2.01E-135 | FC | ACTG1         |
| NDUFA11         | 2.05E-139 | 0.312166467 | 0.915 | 0.9   | 5.17E-135 | FC | NDUFA11       |
| AKR1C1          | 4.12E-139 | 0.4034628   | 0.285 | 0.14  | 1.04E-134 | FC | AKR1C1        |
| NDUFS8          | 4.16E-139 | 0.4009119   | 0.57  | 0.433 | 1.05E-134 | FC | NDUFS8        |
| PROCR.2         | 1.07E-138 | 0.545814586 | 0.634 | 0.501 | 2.70E-134 | FC | PROCR         |
| TPD52           | 1.44E-138 | -0.28541049 | 0.326 | 0.536 | 3.62E-134 | FC | TPD52         |
| TMSB10.3        | 4.72E-138 | 0.818034176 | 0.831 | 0.776 | 1.19E-133 | FC | TMSB10        |
| TAX1BP3         | 4.76E-138 | 0.293632751 | 0.395 | 0.233 | 1.20E-133 | FC | TAX1BP3       |
| PSMA7           | 2.68E-137 | 0.367053334 | 0.899 | 0.876 | 6.76E-133 | FC | PSMA7         |

|            |           |             |       |       |           |    |          |
|------------|-----------|-------------|-------|-------|-----------|----|----------|
| TIMP1.4    | 8.69E-137 | 0.769312036 | 0.998 | 0.995 | 2.19E-132 | FC | TIMP1    |
| COX4I1     | 2.15E-136 | 0.272267705 | 0.957 | 0.958 | 5.42E-132 | FC | COX4I1   |
| DUSP1.4    | 3.93E-136 | -0.60168697 | 0.702 | 0.79  | 9.89E-132 | FC | DUSP1    |
| RAB13      | 4.32E-136 | 0.341667058 | 0.815 | 0.752 | 1.09E-131 | FC | RAB13    |
| RGS3.2     | 4.58E-136 | -0.44487254 | 0.714 | 0.83  | 1.15E-131 | FC | RGS3     |
| COX7B      | 5.69E-136 | 0.334796872 | 0.857 | 0.825 | 1.43E-131 | FC | COX7B    |
| CYB5D2.1   | 2.16E-135 | -0.28580647 | 0.314 | 0.508 | 5.44E-131 | FC | CYB5D2   |
| CCND2.1    | 3.28E-135 | 0.337079862 | 0.518 | 0.351 | 8.26E-131 | FC | CCND2    |
| CTSA       | 6.66E-135 | 0.328057214 | 0.596 | 0.441 | 1.68E-130 | FC | CTSA     |
| MVP        | 1.22E-134 | 0.330778456 | 0.496 | 0.334 | 3.07E-130 | FC | MVP      |
| PLEC       | 1.73E-134 | 0.375360525 | 0.47  | 0.311 | 4.36E-130 | FC | PLEC     |
| MRPS6.3    | 7.66E-133 | -0.43948304 | 0.569 | 0.714 | 1.93E-128 | FC | MRPS6    |
| S100A3     | 8.15E-133 | 0.266532095 | 0.264 | 0.124 | 2.05E-128 | FC | S100A3   |
| IGF2.4     | 2.06E-132 | -0.39921703 | 0.145 | 0.34  | 5.18E-128 | FC | IGF2     |
| SSR3.1     | 2.52E-132 | -0.32739179 | 0.924 | 0.968 | 6.34E-128 | FC | SSR3     |
| LMNA.2     | 6.03E-132 | 0.492786315 | 0.965 | 0.943 | 1.52E-127 | FC | LMNA     |
| AP3S1.3    | 1.20E-131 | -0.36135554 | 0.809 | 0.88  | 3.01E-127 | FC | AP3S1    |
| FGF1.1     | 1.72E-131 | -0.31292744 | 0.304 | 0.503 | 4.33E-127 | FC | FGF1     |
| VCAN.3     | 2.23E-131 | 0.795947188 | 0.409 | 0.244 | 5.63E-127 | FC | VCAN     |
| GAPDH.3    | 9.31E-131 | 0.250206453 | 1     | 1     | 2.35E-126 | FC | GAPDH    |
| HMGCS1.3   | 1.28E-130 | -0.61526924 | 0.251 | 0.435 | 3.22E-126 | FC | HMGCS1   |
| NNMT.4     | 1.85E-130 | 0.324925822 | 0.994 | 0.955 | 4.65E-126 | FC | NNMT     |
| OGN.4      | 6.72E-130 | 0.315410157 | 0.922 | 0.792 | 1.69E-125 | FC | OGN      |
| DNAJC15    | 5.23E-129 | 0.322435047 | 0.662 | 0.534 | 1.32E-124 | FC | DNAJC15  |
| MFI2.3     | 9.73E-129 | -0.35130821 | 0.417 | 0.602 | 2.45E-124 | FC | MFI2     |
| AP2S1      | 2.01E-128 | 0.377391722 | 0.712 | 0.625 | 5.06E-124 | FC | AP2S1    |
| WISP3.1    | 5.89E-128 | -0.33599477 | 0.483 | 0.681 | 1.48E-123 | FC | WISP3    |
| ADM.3      | 7.63E-128 | -0.34139952 | 0.309 | 0.52  | 1.92E-123 | FC | ADM      |
| ATP6V0E1   | 6.31E-127 | 0.31893549  | 0.883 | 0.865 | 1.59E-122 | FC | ATP6V0E1 |
| LTBP4      | 1.11E-125 | 0.323527246 | 0.534 | 0.377 | 2.80E-121 | FC | LTBP4    |
| RNH1       | 1.83E-125 | 0.364695754 | 0.798 | 0.735 | 4.61E-121 | FC | RNH1     |
| MMP14      | 4.09E-125 | 0.35666041  | 0.334 | 0.183 | 1.03E-120 | FC | MMP14    |
| CYBA       | 9.46E-125 | 0.36152715  | 0.757 | 0.67  | 2.38E-120 | FC | CYBA     |
| 11-Sep     | 1.67E-124 | 0.266858709 | 0.241 | 0.112 | 4.20E-120 | FC | 11-Sep   |
| CAST.1     | 3.14E-124 | 0.357956652 | 0.683 | 0.565 | 7.91E-120 | FC | CAST     |
| GAS1.5     | 1.22E-123 | 0.469584143 | 0.571 | 0.396 | 3.08E-119 | FC | GAS1     |
| ATP2B4     | 5.68E-123 | 0.270286492 | 0.452 | 0.292 | 1.43E-118 | FC | ATP2B4   |
| TUBA1B.1   | 6.11E-123 | 0.430040782 | 0.927 | 0.901 | 1.54E-118 | FC | TUBA1B   |
| EFEMP1.4   | 8.02E-123 | 0.490287419 | 0.675 | 0.551 | 2.02E-118 | FC | EFEMP1   |
| FMOD.2     | 2.18E-122 | -0.33736608 | 0.992 | 0.995 | 5.49E-118 | FC | FMOD     |
| UQCRQ      | 5.97E-122 | 0.302016842 | 0.903 | 0.891 | 1.50E-117 | FC | UQCRQ    |
| ATP5H      | 1.60E-121 | 0.305073493 | 0.853 | 0.806 | 4.02E-117 | FC | ATP5H    |
| TIMP3.3    | 4.81E-121 | 1.253519985 | 0.624 | 0.547 | 1.21E-116 | FC | TIMP3    |
| GALE.1     | 1.36E-120 | -0.27558293 | 0.327 | 0.513 | 3.42E-116 | FC | GALE     |
| TPD52L1.2  | 9.68E-120 | -0.41702833 | 0.663 | 0.803 | 2.44E-115 | FC | TPD52L1  |
| CDON.2     | 1.28E-119 | 0.389595145 | 0.568 | 0.425 | 3.21E-115 | FC | CDON     |
| ARPC3      | 3.03E-119 | 0.294093025 | 0.876 | 0.851 | 7.63E-115 | FC | ARPC3    |
| PRPSAP1.2  | 1.65E-118 | -0.2624636  | 0.266 | 0.455 | 4.16E-114 | FC | PRPSAP1  |
| COL12A1.3  | 4.04E-117 | 0.422404673 | 0.515 | 0.346 | 1.02E-112 | FC | COL12A1  |
| DIO2.3     | 6.79E-117 | 0.404077553 | 0.367 | 0.209 | 1.71E-112 | FC | DIO2     |
| ILF3-AS1.1 | 2.05E-116 | -0.2636763  | 0.257 | 0.451 | 5.17E-112 | FC | ILF3-AS1 |
| ANKH.2     | 3.91E-115 | 0.481253851 | 0.782 | 0.732 | 9.86E-111 | FC | ANKH     |
| GRN.2      | 5.81E-115 | 0.321223389 | 0.768 | 0.667 | 1.46E-110 | FC | GRN      |
| NEAT1.3    | 6.16E-115 | 0.374083425 | 0.996 | 0.996 | 1.55E-110 | FC | NEAT1    |
| AKR1C2.2   | 1.65E-114 | 0.400639533 | 0.595 | 0.436 | 4.15E-110 | FC | AKR1C2   |
| CAPG.2     | 2.58E-114 | 0.553972546 | 0.68  | 0.598 | 6.49E-110 | FC | CAPG     |
| TIMP4.3    | 8.02E-114 | -0.38149388 | 0.53  | 0.675 | 2.02E-109 | FC | TIMP4    |
| ARL2       | 9.50E-114 | 0.401355999 | 0.674 | 0.569 | 2.39E-109 | FC | ARL2     |
| NGFRAP1.3  | 1.61E-113 | -0.3326394  | 0.85  | 0.91  | 4.07E-109 | FC | NGFRAP1  |
| DAB2.1     | 2.20E-113 | 0.36507669  | 0.701 | 0.562 | 5.54E-109 | FC | DAB2     |

|                |           |             |       |       |           |    |              |
|----------------|-----------|-------------|-------|-------|-----------|----|--------------|
| EIF4A2.1       | 4.18E-113 | -0.27054998 | 0.935 | 0.973 | 1.05E-108 | FC | EIF4A2       |
| RILPL2         | 2.22E-112 | -0.26529695 | 0.443 | 0.615 | 5.59E-108 | FC | RILPL2       |
| GADD45GIP1     | 7.48E-112 | 0.293143537 | 0.827 | 0.776 | 1.88E-107 | FC | GADD45GIP1   |
| MAP2K6.1       | 3.59E-111 | -0.29193648 | 0.228 | 0.411 | 9.05E-107 | FC | MAP2K6       |
| COL10A1.5      | 5.26E-111 | -1.71316671 | 0.045 | 0.179 | 1.33E-106 | FC | COL10A1      |
| NR4A2.2        | 1.66E-110 | -0.45162612 | 0.493 | 0.649 | 4.17E-106 | FC | NR4A2        |
| APRT           | 1.87E-110 | 0.336515202 | 0.674 | 0.568 | 4.71E-106 | FC | APRT         |
| MT-CO3.3       | 2.72E-110 | 0.365212539 | 0.959 | 0.95  | 6.84E-106 | FC | MT-CO3       |
| C6orf48        | 3.90E-110 | -0.26833986 | 0.908 | 0.959 | 9.82E-106 | FC | C6orf48      |
| TRPS1.2        | 9.20E-110 | 0.336043821 | 0.666 | 0.539 | 2.32E-105 | FC | TRPS1        |
| PID1.3         | 1.90E-109 | -0.33825163 | 0.522 | 0.679 | 4.79E-105 | FC | PID1         |
| PAIP2          | 4.76E-109 | -0.25359999 | 0.702 | 0.828 | 1.20E-104 | FC | PAIP2        |
| HIGD2A         | 4.99E-109 | 0.288448716 | 0.563 | 0.425 | 1.26E-104 | FC | HIGD2A       |
| MSMO1.3        | 5.97E-109 | -0.39933094 | 0.243 | 0.41  | 1.50E-104 | FC | MSMO1        |
| ABL2           | 6.16E-109 | 0.301521595 | 0.336 | 0.196 | 1.55E-104 | FC | ABL2         |
| NDRG1.2        | 9.57E-109 | 0.350323195 | 0.743 | 0.638 | 2.41E-104 | FC | NDRG1        |
| DUSP14.2       | 2.14E-108 | -0.41303809 | 0.486 | 0.631 | 5.39E-104 | FC | DUSP14       |
| STK17A.1       | 2.44E-108 | -0.30885917 | 0.294 | 0.469 | 6.15E-104 | FC | STK17A       |
| EPB41L4A-AS1.1 | 4.60E-108 | -0.26757879 | 0.693 | 0.831 | 1.16E-103 | FC | EPB41L4A-AS1 |
| FKBP1A         | 1.42E-107 | 0.3202696   | 0.689 | 0.603 | 3.58E-103 | FC | FKBP1A       |
| COX5B          | 4.15E-107 | 0.252287439 | 0.933 | 0.926 | 1.04E-102 | FC | COX5B        |
| IFI27          | 5.30E-107 | 0.44403219  | 0.253 | 0.129 | 1.34E-102 | FC | IFI27        |
| TSPYL2.2       | 1.84E-106 | -0.28915945 | 0.359 | 0.537 | 4.63E-102 | FC | TSPYL2       |
| FOXP1.1        | 6.36E-106 | 0.279157861 | 0.566 | 0.412 | 1.60E-101 | FC | FOXP1        |
| ANKRD28        | 5.23E-105 | 0.332004821 | 0.577 | 0.439 | 1.32E-100 | FC | ANKRD28      |
| WBP2           | 7.44E-105 | -0.25467032 | 0.588 | 0.733 | 1.87E-100 | FC | WBP2         |
| NDUFA13        | 1.70E-104 | 0.305710454 | 0.811 | 0.763 | 4.28E-100 | FC | NDUFA13      |
| DLC1.1         | 1.78E-104 | 0.251512424 | 0.446 | 0.294 | 4.48E-100 | FC | DLC1         |
| ZBTB16         | 2.26E-104 | -0.26534031 | 0.357 | 0.537 | 5.69E-100 | FC | ZBTB16       |
| MT-ND1.1       | 3.37E-104 | 0.32295875  | 0.954 | 0.937 | 8.49E-100 | FC | MT-ND1       |
| ZNHIT1         | 3.38E-104 | 0.314365524 | 0.75  | 0.686 | 8.51E-100 | FC | ZNHIT1       |
| MFAP4          | 5.27E-104 | 0.29876657  | 0.276 | 0.148 | 1.33E-99  | FC | MFAP4        |
| PSMD8          | 7.11E-104 | 0.295172256 | 0.754 | 0.69  | 1.79E-99  | FC | PSMD8        |
| PRELP.2        | 2.38E-103 | -0.48312139 | 0.997 | 0.998 | 5.99E-99  | FC | PRELP        |
| ATP5J2         | 3.09E-103 | 0.327572849 | 0.812 | 0.777 | 7.79E-99  | FC | ATP5J2       |
| CSRNP1.3       | 1.68E-102 | -0.28289542 | 0.576 | 0.737 | 4.24E-98  | FC | CSRNP1       |
| AMTN.3         | 3.11E-102 | 0.955756987 | 0.197 | 0.09  | 7.84E-98  | FC | AMTN         |
| UGDH.1         | 5.14E-102 | 0.366395853 | 0.701 | 0.616 | 1.29E-97  | FC | UGDH         |
| SRGN           | 1.26E-101 | -0.25555277 | 0.574 | 0.753 | 3.18E-97  | FC | SRGN         |
| TPM3           | 1.62E-101 | 0.294493295 | 0.691 | 0.587 | 4.09E-97  | FC | TPM3         |
| FGFR1.3        | 2.30E-101 | -0.3833868  | 0.62  | 0.733 | 5.79E-97  | FC | FGFR1        |
| FBN1           | 2.65E-101 | 0.389931926 | 0.428 | 0.293 | 6.68E-97  | FC | FBN1         |
| REXO2.2        | 3.40E-101 | 0.301168744 | 0.897 | 0.863 | 8.56E-97  | FC | REXO2        |
| SRSF3.1        | 7.49E-101 | -0.27208601 | 0.932 | 0.969 | 1.89E-96  | FC | SRSF3        |
| NUCKS1         | 1.14E-100 | 0.289416829 | 0.914 | 0.888 | 2.87E-96  | FC | NUCKS1       |
| RBX1           | 1.16E-100 | 0.304615639 | 0.815 | 0.777 | 2.92E-96  | FC | RBX1         |
| MMP3.4         | 1.29E-100 | -0.68935398 | 0.411 | 0.589 | 3.25E-96  | FC | MMP3         |
| C11orf96.2     | 2.98E-100 | -0.4775305  | 0.356 | 0.504 | 7.52E-96  | FC | C11orf96     |
| PSME1          | 3.60E-100 | 0.324065713 | 0.627 | 0.508 | 9.08E-96  | FC | PSME1        |
| PIM3           | 4.15E-100 | -0.27936635 | 0.249 | 0.414 | 1.05E-95  | FC | PIM3         |
| BZW1.2         | 1.76E-99  | 0.345986633 | 0.909 | 0.883 | 4.43E-95  | FC | BZW1         |
| NFKBIZ.4       | 2.17E-99  | 0.298882194 | 0.64  | 0.494 | 5.47E-95  | FC | NFKBIZ       |
| GREM1.5        | 4.03E-99  | -0.64881128 | 0.133 | 0.283 | 1.01E-94  | FC | GREM1        |
| MYL6.1         | 6.54E-99  | 0.40572765  | 0.985 | 0.986 | 1.65E-94  | FC | MYL6         |
| PEBP1.2        | 7.36E-99  | -0.26014379 | 0.94  | 0.966 | 1.86E-94  | FC | PEBP1        |
| FAM114A1       | 1.51E-97  | 0.313375977 | 0.76  | 0.706 | 3.81E-93  | FC | FAM114A1     |
| FXYD5.3        | 2.07E-97  | 0.283987279 | 0.951 | 0.943 | 5.21E-93  | FC | FXYD5        |
| SOD3.2         | 2.67E-97  | -0.34646454 | 0.856 | 0.942 | 6.73E-93  | FC | SOD3         |
| FAM43A.3       | 8.30E-97  | -0.32838863 | 0.127 | 0.275 | 2.09E-92  | FC | FAM43A       |
| NOP10          | 4.34E-96  | 0.31338458  | 0.783 | 0.744 | 1.09E-91  | FC | NOP10        |

|            |          |             |       |       |          |    |          |
|------------|----------|-------------|-------|-------|----------|----|----------|
| AQP3.2     | 1.05E-95 | -0.48041388 | 0.225 | 0.386 | 2.65E-91 | FC | AQP3     |
| RABAC1.2   | 2.29E-95 | 0.330619278 | 0.957 | 0.963 | 5.77E-91 | FC | RABAC1   |
| HSPB6.3    | 9.66E-95 | -0.27764055 | 0.294 | 0.454 | 2.43E-90 | FC | HSPB6    |
| YBX3.1     | 7.90E-94 | 0.304210594 | 0.744 | 0.653 | 1.99E-89 | FC | YBX3     |
| CSTB       | 2.13E-93 | 0.287297207 | 0.867 | 0.833 | 5.36E-89 | FC | CSTB     |
| RBPJ       | 6.80E-93 | 0.278327058 | 0.588 | 0.459 | 1.71E-88 | FC | RBPJ     |
| SLPI.3     | 1.22E-92 | -0.64813705 | 0.104 | 0.25  | 3.08E-88 | FC | SLPI     |
| GPX8       | 3.42E-92 | 0.283025026 | 0.526 | 0.403 | 8.62E-88 | FC | GPX8     |
| C4orf48    | 3.99E-92 | 0.282902373 | 0.486 | 0.359 | 1.01E-87 | FC | C4orf48  |
| PTRF       | 6.17E-92 | 0.378739686 | 0.803 | 0.753 | 1.55E-87 | FC | PTRF     |
| PRDX1      | 7.92E-92 | 0.390387328 | 0.959 | 0.958 | 2.00E-87 | FC | PRDX1    |
| TSPAN3.3   | 7.93E-92 | -0.26801613 | 0.543 | 0.675 | 2.00E-87 | FC | TSPAN3   |
| COL5A2.4   | 2.13E-91 | 0.520876011 | 0.735 | 0.643 | 5.37E-87 | FC | COL5A2   |
| WBP5       | 2.21E-91 | 0.293649757 | 0.87  | 0.825 | 5.56E-87 | FC | WBP5     |
| TMEM59.2   | 2.52E-91 | -0.25261497 | 0.973 | 0.986 | 6.35E-87 | FC | TMEM59   |
| CLIC3.1    | 2.68E-91 | 0.251368828 | 0.256 | 0.134 | 6.75E-87 | FC | CLIC3    |
| CIB1       | 2.83E-91 | 0.336074998 | 0.785 | 0.737 | 7.13E-87 | FC | CIB1     |
| RARRES2.5  | 3.54E-91 | -0.31918767 | 0.219 | 0.393 | 8.91E-87 | FC | RARRES2  |
| YWHAB      | 5.57E-91 | 0.289095135 | 0.748 | 0.672 | 1.40E-86 | FC | YWHAB    |
| NDFIP1.1   | 1.43E-90 | 0.292282258 | 0.91  | 0.891 | 3.61E-86 | FC | NDFIP1   |
| ARPC5      | 2.98E-90 | 0.312058282 | 0.68  | 0.601 | 7.51E-86 | FC | ARPC5    |
| ADIRF.1    | 1.09E-89 | 0.509588603 | 0.946 | 0.918 | 2.75E-85 | FC | ADIRF    |
| MRGPRF     | 2.57E-89 | 0.266391763 | 0.424 | 0.289 | 6.48E-85 | FC | MRGPRF   |
| PHLDA1.2   | 6.67E-89 | -0.47399426 | 0.664 | 0.76  | 1.68E-84 | FC | PHLDA1   |
| QSOX1.1    | 7.10E-89 | -0.26598867 | 0.712 | 0.811 | 1.79E-84 | FC | QSOX1    |
| DAP.3      | 1.48E-88 | -0.26911608 | 0.602 | 0.722 | 3.73E-84 | FC | DAP      |
| SMIM14     | 1.92E-88 | 0.451252916 | 0.724 | 0.687 | 4.84E-84 | FC | SMIM14   |
| LAMB2      | 2.37E-88 | 0.29558669  | 0.603 | 0.486 | 5.97E-84 | FC | LAMB2    |
| THBS2      | 1.21E-87 | 0.277471401 | 0.211 | 0.107 | 3.06E-83 | FC | THBS2    |
| MTRNR2L2.1 | 1.74E-87 | -0.33678904 | 0.335 | 0.501 | 4.38E-83 | FC | MTRNR2L2 |
| RTN4       | 2.50E-87 | 0.270425937 | 0.888 | 0.878 | 6.31E-83 | FC | RTN4     |
| 15-Sep     | 3.30E-87 | 0.281527748 | 0.725 | 0.666 | 8.32E-83 | FC | 15-Sep   |
| TSPYL1     | 7.89E-87 | -0.27175528 | 0.419 | 0.574 | 1.99E-82 | FC | TSPYL1   |
| FOXO1      | 1.38E-86 | 0.301771699 | 0.456 | 0.331 | 3.49E-82 | FC | FOXO1    |
| LRP1       | 1.93E-86 | 0.300905437 | 0.886 | 0.848 | 4.87E-82 | FC | LRP1     |
| RHOB.4     | 2.63E-86 | -0.3878473  | 0.707 | 0.803 | 6.63E-82 | FC | RHOB     |
| DRAP1      | 3.19E-86 | 0.297863439 | 0.727 | 0.663 | 8.04E-82 | FC | DRAP1    |
| OSTC.5     | 4.95E-86 | 0.314199313 | 0.853 | 0.843 | 1.25E-81 | FC | OSTC     |
| SEMA3A.1   | 1.55E-85 | 0.359790115 | 0.366 | 0.242 | 3.90E-81 | FC | SEMA3A   |
| PSMB3      | 6.27E-85 | 0.271661836 | 0.754 | 0.684 | 1.58E-80 | FC | PSMB3    |
| TOB1.2     | 7.96E-85 | -0.30745567 | 0.517 | 0.648 | 2.01E-80 | FC | TOB1     |
| SLC39A14.5 | 9.31E-85 | 0.340996617 | 0.786 | 0.741 | 2.34E-80 | FC | SLC39A14 |
| CTNNA1     | 1.07E-84 | 0.259453486 | 0.631 | 0.521 | 2.69E-80 | FC | CTNNA1   |
| XBP1.1     | 1.41E-84 | -0.25712358 | 0.907 | 0.947 | 3.56E-80 | FC | XBP1     |
| PFKP.2     | 1.44E-84 | 0.383646959 | 0.739 | 0.683 | 3.63E-80 | FC | PFKP     |
| S100A16    | 1.75E-84 | 0.348732926 | 0.472 | 0.351 | 4.40E-80 | FC | S100A16  |
| AEBP1.4    | 3.07E-84 | 0.357124745 | 0.911 | 0.834 | 7.73E-80 | FC | AEBP1    |
| FAM127A    | 1.74E-83 | 0.26252747  | 0.728 | 0.662 | 4.39E-79 | FC | FAM127A  |
| AKAP13     | 2.06E-83 | 0.264235576 | 0.608 | 0.489 | 5.18E-79 | FC | AKAP13   |
| ITGAV      | 2.49E-83 | 0.26461536  | 0.525 | 0.404 | 6.27E-79 | FC | ITGAV    |
| FLNA       | 6.25E-83 | 0.333932536 | 0.424 | 0.303 | 1.58E-78 | FC | FLNA     |
| ZFP36L2.1  | 3.64E-82 | 0.286087107 | 0.482 | 0.344 | 9.18E-78 | FC | ZFP36L2  |
| TUBB2A.1   | 1.52E-81 | -0.26811456 | 0.576 | 0.711 | 3.84E-77 | FC | TUBB2A   |
| HERPUD1.1  | 1.80E-81 | -0.27068857 | 0.893 | 0.934 | 4.55E-77 | FC | HERPUD1  |
| MATN2      | 3.31E-81 | 0.345433789 | 0.384 | 0.268 | 8.35E-77 | FC | MATN2    |
| RHOA       | 7.36E-81 | 0.289456958 | 0.899 | 0.904 | 1.85E-76 | FC | RHOA     |
| GNAS.1     | 6.12E-80 | 0.312251566 | 0.811 | 0.768 | 1.54E-75 | FC | GNAS     |
| GFPT2.1    | 3.21E-79 | 0.535145447 | 0.412 | 0.294 | 8.10E-75 | FC | GFPT2    |
| AUP1       | 3.45E-79 | 0.251254117 | 0.567 | 0.465 | 8.69E-75 | FC | AUP1     |
| AKR1B1     | 4.56E-78 | 0.288771133 | 0.52  | 0.404 | 1.15E-73 | FC | AKR1B1   |

|               |          |             |       |       |          |    |               |
|---------------|----------|-------------|-------|-------|----------|----|---------------|
| DNAJB1.1      | 4.63E-78 | -0.33940361 | 0.677 | 0.78  | 1.17E-73 | FC | DNAJB1        |
| GALNT15.4     | 4.79E-78 | 0.301563154 | 0.607 | 0.485 | 1.21E-73 | FC | GALNT15       |
| PDLIM4        | 5.42E-78 | 0.25439208  | 0.799 | 0.722 | 1.37E-73 | FC | PDLIM4        |
| JUND.2        | 5.50E-78 | -0.31919108 | 0.736 | 0.818 | 1.38E-73 | FC | JUND          |
| TIPARP.1      | 8.04E-78 | -0.2851286  | 0.455 | 0.603 | 2.03E-73 | FC | TIPARP        |
| CD44.3        | 9.19E-78 | 0.391419394 | 0.743 | 0.678 | 2.31E-73 | FC | CD44          |
| SLC7A2.3      | 1.02E-77 | 0.443888085 | 0.46  | 0.356 | 2.56E-73 | FC | SLC7A2        |
| ATP5G1        | 1.28E-77 | 0.266899262 | 0.75  | 0.696 | 3.21E-73 | FC | ATP5G1        |
| GPX1.1        | 2.28E-77 | 0.274068505 | 0.811 | 0.765 | 5.73E-73 | FC | GPX1          |
| IBSP.5        | 3.10E-77 | -2.45785892 | 0.066 | 0.176 | 7.82E-73 | FC | IBSP          |
| MPG           | 1.06E-76 | 0.256694761 | 0.66  | 0.577 | 2.67E-72 | FC | MPG           |
| YIF1A.1       | 1.29E-76 | 0.292220407 | 0.722 | 0.668 | 3.24E-72 | FC | YIF1A         |
| MSN           | 1.95E-76 | 0.287805326 | 0.597 | 0.501 | 4.90E-72 | FC | MSN           |
| PTN.2         | 2.46E-75 | 0.537968033 | 0.326 | 0.213 | 6.20E-71 | FC | PTN           |
| IGFBP6.5      | 3.70E-75 | 0.769444351 | 0.756 | 0.691 | 9.32E-71 | FC | IGFBP6        |
| CD83.2        | 4.57E-75 | -0.27060459 | 0.069 | 0.183 | 1.15E-70 | FC | CD83          |
| SREK1IP1      | 6.82E-75 | 0.281528274 | 0.584 | 0.482 | 1.72E-70 | FC | SREK1IP1      |
| POSTN         | 7.18E-75 | 0.614706462 | 0.122 | 0.049 | 1.81E-70 | FC | POSTN         |
| NDUFS6        | 1.05E-74 | 0.268842744 | 0.706 | 0.65  | 2.64E-70 | FC | NDUFS6        |
| HES1.4        | 2.16E-74 | -0.49370955 | 0.387 | 0.525 | 5.43E-70 | FC | HES1          |
| CD47          | 3.84E-74 | 0.27581186  | 0.609 | 0.501 | 9.67E-70 | FC | CD47          |
| DDIT4.2       | 1.26E-73 | -0.5416043  | 0.409 | 0.546 | 3.17E-69 | FC | DDIT4         |
| GLRX.5        | 1.11E-72 | 0.2917222   | 0.587 | 0.461 | 2.80E-68 | FC | GLRX          |
| CDO1.2        | 3.65E-72 | -0.29321242 | 0.931 | 0.968 | 9.18E-68 | FC | CDO1          |
| DST.2         | 4.32E-72 | 0.258400251 | 0.85  | 0.806 | 1.09E-67 | FC | DST           |
| TSPAN4        | 7.50E-72 | 0.27719652  | 0.683 | 0.58  | 1.89E-67 | FC | TSPAN4        |
| ARPC2         | 4.67E-71 | 0.255157813 | 0.884 | 0.885 | 1.18E-66 | FC | ARPC2         |
| LHFP          | 5.86E-71 | 0.264987791 | 0.502 | 0.384 | 1.48E-66 | FC | LHFP          |
| CD82          | 7.98E-71 | 0.270880841 | 0.351 | 0.24  | 2.01E-66 | FC | CD82          |
| ISG15         | 9.73E-71 | 0.255581976 | 0.163 | 0.077 | 2.45E-66 | FC | ISG15         |
| EPB41L2.1     | 1.24E-70 | 0.295984397 | 0.667 | 0.569 | 3.13E-66 | FC | EPB41L2       |
| IQGAP1        | 3.07E-70 | 0.255774149 | 0.667 | 0.586 | 7.74E-66 | FC | IQGAP1        |
| FNDC1         | 9.94E-70 | 0.371057331 | 0.234 | 0.136 | 2.50E-65 | FC | FNDC1         |
| GLI3.2        | 2.95E-69 | 0.300934305 | 0.535 | 0.428 | 7.44E-65 | FC | GLI3          |
| COX7A1.1      | 5.88E-69 | 0.288539906 | 0.877 | 0.866 | 1.48E-64 | FC | COX7A1        |
| 7-Sep         | 4.02E-68 | 0.256040466 | 0.868 | 0.847 | 1.01E-63 | FC | 7-Sep         |
| LOXL2.3       | 4.71E-68 | 0.279270383 | 0.366 | 0.248 | 1.19E-63 | FC | LOXL2         |
| OMD.1         | 5.23E-68 | -0.59035333 | 0.591 | 0.673 | 1.32E-63 | FC | OMD           |
| SDF2L1        | 9.85E-68 | 0.275629786 | 0.494 | 0.389 | 2.48E-63 | FC | SDF2L1        |
| KLF10.4       | 2.62E-67 | -0.35228142 | 0.493 | 0.616 | 6.59E-63 | FC | KLF10         |
| CILP2.4       | 1.09E-66 | -0.52877956 | 0.708 | 0.777 | 2.74E-62 | FC | CILP2         |
| SERTAD4-AS1.2 | 2.75E-66 | -0.27530084 | 0.551 | 0.669 | 6.92E-62 | FC | SERTAD4-AS1   |
| SDC4.1        | 3.31E-66 | -0.43248071 | 0.496 | 0.614 | 8.33E-62 | FC | SDC4          |
| SNAI2.3       | 5.05E-66 | -0.28313168 | 0.473 | 0.615 | 1.27E-61 | FC | SNAI2         |
| SKIL.1        | 7.08E-66 | -0.25866946 | 0.509 | 0.624 | 1.78E-61 | FC | SKIL          |
| GPR64         | 1.83E-65 | 0.26059328  | 0.422 | 0.311 | 4.62E-61 | FC | GPR64         |
| PIM1.3        | 8.64E-65 | -0.34403433 | 0.22  | 0.345 | 2.18E-60 | FC | PIM1          |
| MAFB.3        | 2.21E-64 | 0.297534053 | 0.396 | 0.274 | 5.56E-60 | FC | MAFB          |
| CPE.3         | 3.15E-64 | -0.29067685 | 0.254 | 0.387 | 7.93E-60 | FC | CPE           |
| LIMA1         | 6.46E-63 | 0.265717636 | 0.529 | 0.419 | 1.63E-58 | FC | LIMA1         |
| TM4SF1.2      | 2.38E-60 | 0.274867592 | 0.697 | 0.613 | 5.99E-56 | FC | TM4SF1        |
| MEF2C.3       | 4.00E-60 | -0.27790839 | 0.334 | 0.463 | 1.01E-55 | FC | MEF2C         |
| EGR3.3        | 1.25E-59 | -0.31904095 | 0.165 | 0.274 | 3.14E-55 | FC | EGR3          |
| HM13          | 1.46E-59 | 0.255634672 | 0.653 | 0.599 | 3.68E-55 | FC | HM13          |
| MT1X.2        | 9.18E-58 | -0.37552272 | 0.994 | 0.994 | 2.31E-53 | FC | MT1X          |
| PPIC.3        | 1.78E-57 | 0.251012125 | 0.793 | 0.732 | 4.48E-53 | FC | PPIC          |
| RP11-572C15.6 | 1.85E-56 | 0.343967542 | 0.419 | 0.325 | 4.66E-52 | FC | RP11-572C15.6 |
| GLUL.3        | 2.88E-56 | 0.290700442 | 0.642 | 0.554 | 7.27E-52 | FC | GLUL          |
| PAPPA.2       | 3.56E-56 | 0.328017045 | 0.184 | 0.103 | 8.98E-52 | FC | PAPPA         |
| MXRA8.1       | 4.94E-55 | 0.273939534 | 0.81  | 0.763 | 1.25E-50 | FC | MXRA8         |

|             |           |             |       |       |           |       |           |
|-------------|-----------|-------------|-------|-------|-----------|-------|-----------|
| ANXA1.1     | 1.08E-54  | 0.293693589 | 0.982 | 0.978 | 2.71E-50  | FC    | ANXA1     |
| TNFRSF11B.5 | 1.73E-53  | -0.38089537 | 0.712 | 0.814 | 4.37E-49  | FC    | TNFRSF11B |
| RAMP1.4     | 4.38E-53  | -0.33054067 | 0.174 | 0.284 | 1.10E-48  | FC    | RAMP1     |
| ID2.1       | 2.25E-51  | -0.37023742 | 0.906 | 0.924 | 5.67E-47  | FC    | ID2       |
| HSPA1A.1    | 2.79E-51  | -0.43021844 | 0.734 | 0.806 | 7.03E-47  | FC    | HSPA1A    |
| SERPINH1.2  | 7.80E-49  | 0.279181201 | 0.665 | 0.586 | 1.97E-44  | FC    | SERPINH1  |
| SLC29A1.3   | 5.22E-44  | -0.26071166 | 0.738 | 0.811 | 1.31E-39  | FC    | SLC29A1   |
| AK1.3       | 6.07E-44  | 0.316716662 | 0.859 | 0.865 | 1.53E-39  | FC    | AK1       |
| FABP3       | 3.05E-43  | 0.45081844  | 0.137 | 0.074 | 7.68E-39  | FC    | FABP3     |
| DDAH2       | 4.02E-43  | 0.25832035  | 0.521 | 0.449 | 1.01E-38  | FC    | DDAH2     |
| THBS4.2     | 4.69E-43  | 0.26792041  | 0.249 | 0.169 | 1.18E-38  | FC    | THBS4     |
| TAGLN.4     | 1.81E-42  | -0.37271739 | 0.134 | 0.231 | 4.56E-38  | FC    | TAGLN     |
| MEG3.3      | 6.93E-42  | -0.41648152 | 0.441 | 0.532 | 1.75E-37  | FC    | MEG3      |
| SPARC.2     | 2.01E-37  | -0.42930088 | 0.974 | 0.976 | 5.06E-33  | FC    | SPARC     |
| HSPA1B.1    | 3.13E-35  | -0.35770781 | 0.622 | 0.694 | 7.90E-31  | FC    | HSPA1B    |
| CAPN2       | 4.87E-34  | 0.264449069 | 0.509 | 0.455 | 1.23E-29  | FC    | CAPN2     |
| ICAM1.4     | 5.05E-34  | -0.43379189 | 0.438 | 0.531 | 1.27E-29  | FC    | ICAM1     |
| MSMP        | 1.52E-33  | 0.997393747 | 0.114 | 0.063 | 3.83E-29  | FC    | MSMP      |
| CAV1.1      | 2.37E-32  | 0.317882824 | 0.775 | 0.775 | 5.98E-28  | FC    | CAV1      |
| CCDC80.1    | 4.95E-32  | 0.522243707 | 0.856 | 0.869 | 1.25E-27  | FC    | CCDC80    |
| ZFP36L1.1   | 1.91E-31  | 0.272883966 | 0.809 | 0.772 | 4.82E-27  | FC    | ZFP36L1   |
| HIST1H1C.2  | 2.10E-31  | -0.26377826 | 0.202 | 0.284 | 5.28E-27  | FC    | HIST1H1C  |
| NFATC2.2    | 2.40E-29  | -0.29867775 | 0.499 | 0.561 | 6.06E-25  | FC    | NFATC2    |
| CRYAB.4     | 1.61E-28  | -0.46074936 | 0.789 | 0.83  | 4.07E-24  | FC    | CRYAB     |
| UAP1        | 5.24E-28  | 0.286382547 | 0.702 | 0.686 | 1.32E-23  | FC    | UAP1      |
| CD9.2       | 1.21E-27  | 0.5442629   | 0.94  | 0.958 | 3.05E-23  | FC    | CD9       |
| MT1E.2      | 8.89E-22  | -0.33449158 | 0.992 | 0.991 | 2.24E-17  | FC    | MT1E      |
| IGFBP7.2    | 3.48E-21  | 0.256209189 | 0.622 | 0.584 | 8.77E-17  | FC    | IGFBP7    |
| ENPP1.1     | 1.87E-17  | 0.348765369 | 0.72  | 0.714 | 4.71E-13  | FC    | ENPP1     |
| C1S.1       | 4.49E-17  | 0.277751171 | 0.862 | 0.854 | 1.13E-12  | FC    | C1S       |
| ANXA5       | 8.78E-16  | 0.264830171 | 0.936 | 0.941 | 2.21E-11  | FC    | ANXA5     |
| SERPINE2.3  | 4.39E-15  | 0.370281546 | 0.646 | 0.611 | 1.11E-10  | FC    | SERPINE2  |
| RND1.3      | 5.90E-15  | -0.25304394 | 0.164 | 0.216 | 1.49E-10  | FC    | RND1      |
| CYP1B1.1    | 1.52E-14  | 0.460356651 | 0.388 | 0.366 | 3.83E-10  | FC    | CYP1B1    |
| MT1G.2      | 7.16E-12  | -0.68992584 | 0.74  | 0.753 | 1.80E-07  | FC    | MT1G      |
| IER3.4      | 1.96E-09  | -0.50277547 | 0.874 | 0.869 | 4.94E-05  | FC    | IER3      |
| SPP1.5      | 4.90E-09  | -1.46484034 | 0.356 | 0.381 | 0.000123  | FC    | SPP1      |
| NPC2.2      | 5.99E-07  | 0.267563421 | 0.93  | 0.952 | 0.0151    | FC    | NPC2      |
| RGS16.4     | 1.90E-05  | -0.30317396 | 0.706 | 0.749 | 0.477786  | FC    | RGS16     |
| CHI3L1.5    | 0.000193  | 0.313768018 | 0.762 | 0.793 | 1         | FC    | CHI3L1    |
| RCAN1.3     | 0.000265  | -0.300854   | 0.673 | 0.681 | 1         | FC    | RCAN1     |
| KLF6.4      | 0.000488  | -0.25804353 | 0.773 | 0.771 | 1         | FC    | KLF6      |
| TNP1        | 1.00E-200 | 1.110050212 | 0.121 | 0.004 | 2.53E-196 | preFC | TNP1      |
| WNT16       | 1.77E-192 | 1.013132476 | 0.241 | 0.021 | 4.47E-188 | preFC | WNT16     |
| IL11        | 1.30E-168 | 3.788135762 | 0.376 | 0.06  | 3.29E-164 | preFC | IL11      |
| COCH        | 1.30E-156 | 0.897515862 | 0.342 | 0.051 | 3.27E-152 | preFC | COCH      |
| SPP1.6      | 6.59E-116 | 3.510532611 | 0.765 | 0.37  | 1.66E-111 | preFC | SPP1      |
| CLIC3.2     | 3.78E-115 | 1.370465714 | 0.515 | 0.148 | 9.53E-111 | preFC | CLIC3     |
| LAMB3       | 1.47E-104 | 0.410422927 | 0.26  | 0.043 | 3.70E-100 | preFC | LAMB3     |
| KCNN4.1     | 8.32E-104 | 0.334423284 | 0.399 | 0.091 | 2.10E-99  | preFC | KCNN4     |
| TNFSF11.1   | 8.59E-102 | 0.487028169 | 0.401 | 0.094 | 2.16E-97  | preFC | TNFSF11   |
| AOC2        | 4.04E-101 | 0.623662875 | 0.472 | 0.132 | 1.02E-96  | preFC | AOC2      |
| S100A2      | 9.08E-101 | 2.143299852 | 0.362 | 0.082 | 2.29E-96  | preFC | S100A2    |
| DUSP4       | 3.97E-100 | 0.364722158 | 0.207 | 0.029 | 1.00E-95  | preFC | DUSP4     |
| TGM2        | 6.52E-100 | 1.087294807 | 0.597 | 0.208 | 1.64E-95  | preFC | TGM2      |
| LINC00545   | 4.17E-94  | 0.69398879  | 0.385 | 0.096 | 1.05E-89  | preFC | LINC00545 |
| PAPPA.3     | 8.86E-85  | 1.693649975 | 0.396 | 0.111 | 2.23E-80  | preFC | PAPPA     |
| TMEM59L     | 2.55E-83  | 0.293786645 | 0.244 | 0.045 | 6.41E-79  | preFC | TMEM59L   |
| TNFRSF11B.6 | 1.29E-82  | 1.984782072 | 0.973 | 0.794 | 3.24E-78  | preFC | TNFRSF11B |
| LEPREL1     | 1.13E-80  | 0.587534291 | 0.449 | 0.143 | 2.85E-76  | preFC | LEPREL1   |

|            |          |             |       |       |          |       |          |
|------------|----------|-------------|-------|-------|----------|-------|----------|
| CXCL14     | 2.93E-80 | 1.834847307 | 0.287 | 0.064 | 7.39E-76 | preFC | CXCL14   |
| DNER.1     | 4.61E-78 | 0.571012709 | 0.551 | 0.203 | 1.16E-73 | preFC | DNER     |
| ANKH.3     | 4.72E-78 | 1.153413534 | 0.938 | 0.737 | 1.19E-73 | preFC | ANKH     |
| S100A6.3   | 4.22E-77 | 1.191405043 | 1     | 0.999 | 1.06E-72 | preFC | S100A6   |
| TREM1.4    | 2.33E-76 | 0.575037958 | 0.342 | 0.086 | 5.88E-72 | preFC | TREM1    |
| CRYAB.5    | 9.13E-75 | 1.279689097 | 0.973 | 0.82  | 2.30E-70 | preFC | CRYAB    |
| SEMA3D     | 1.15E-74 | 0.956454005 | 0.572 | 0.23  | 2.90E-70 | preFC | SEMA3D   |
| CRLF1.6    | 1.65E-74 | 0.940425565 | 0.592 | 0.239 | 4.15E-70 | preFC | CRLF1    |
| IGFBP5.5   | 6.31E-74 | 2.518915717 | 0.547 | 0.223 | 1.59E-69 | preFC | IGFBP5   |
| FN1.6      | 6.86E-73 | 1.164690505 | 1     | 0.999 | 1.73E-68 | preFC | FN1      |
| COL10A1.6  | 3.87E-71 | 0.888329747 | 0.462 | 0.151 | 9.74E-67 | preFC | COL10A1  |
| TIMP1.5    | 4.19E-67 | 1.119939565 | 1     | 0.995 | 1.06E-62 | preFC | TIMP1    |
| IBSP.6     | 2.27E-66 | 0.835512529 | 0.451 | 0.153 | 5.73E-62 | preFC | IBSP     |
| AK1.4      | 2.14E-64 | 0.671130407 | 0.989 | 0.862 | 5.39E-60 | preFC | AK1      |
| OCIAD2     | 9.26E-64 | 0.417235059 | 0.542 | 0.215 | 2.33E-59 | preFC | OCIAD2   |
| MFI2.4     | 2.45E-63 | 0.627801397 | 0.879 | 0.566 | 6.17E-59 | preFC | MFI2     |
| CFH.5      | 2.96E-63 | -1.6930708  | 0.904 | 0.948 | 7.45E-59 | preFC | CFH      |
| MFGE8.5    | 4.39E-62 | 0.753991991 | 0.993 | 0.944 | 1.11E-57 | preFC | MFGE8    |
| DSC2       | 2.48E-60 | 0.329383959 | 0.282 | 0.074 | 6.25E-56 | preFC | DSC2     |
| BGN.2      | 8.00E-59 | -0.62859884 | 0.998 | 0.999 | 2.02E-54 | preFC | BGN      |
| NOVA1.1    | 1.02E-58 | 0.893350181 | 0.711 | 0.396 | 2.56E-54 | preFC | NOVA1    |
| CPE.4      | 2.04E-58 | 0.544306024 | 0.72  | 0.358 | 5.15E-54 | preFC | CPE      |
| COX17      | 1.07E-56 | 0.695177038 | 0.932 | 0.744 | 2.71E-52 | preFC | COX17    |
| TNFAIP6.6  | 3.06E-56 | 1.158991573 | 0.485 | 0.196 | 7.71E-52 | preFC | TNFAIP6  |
| SERPINE2.4 | 1.27E-55 | 1.723688035 | 0.822 | 0.613 | 3.20E-51 | preFC | SERPINE2 |
| F13A1.1    | 1.61E-55 | 0.30932198  | 0.346 | 0.106 | 4.05E-51 | preFC | F13A1    |
| AGR2.1     | 2.24E-55 | 0.65800314  | 0.232 | 0.055 | 5.63E-51 | preFC | AGR2     |
| C1S.2      | 3.13E-55 | -0.76315674 | 0.704 | 0.858 | 7.88E-51 | preFC | C1S      |
| IGFBP6.6   | 3.31E-55 | 1.15298427  | 0.934 | 0.698 | 8.33E-51 | preFC | IGFBP6   |
| TSPAN13.4  | 4.27E-54 | 0.400412719 | 0.695 | 0.34  | 1.08E-49 | preFC | TSPAN13  |
| LSP1.2     | 2.39E-53 | -0.72788227 | 0.731 | 0.894 | 6.02E-49 | preFC | LSP1     |
| SCD        | 2.56E-53 | 0.454793655 | 0.506 | 0.209 | 6.44E-49 | preFC | SCD      |
| MGP.2      | 3.07E-53 | 0.979660727 | 1     | 1     | 7.74E-49 | preFC | MGP      |
| PLA2G2A.3  | 1.88E-52 | -1.09782551 | 0.979 | 0.99  | 4.73E-48 | preFC | PLA2G2A  |
| S100A13.4  | 3.75E-52 | 0.625781073 | 1     | 0.976 | 9.46E-48 | preFC | S100A13  |
| DSG2       | 5.97E-52 | 0.342204783 | 0.465 | 0.184 | 1.51E-47 | preFC | DSG2     |
| SLC29A1.4  | 1.00E-51 | 0.710864826 | 0.961 | 0.796 | 2.53E-47 | preFC | SLC29A1  |
| FSTL3      | 1.09E-51 | 0.434865176 | 0.301 | 0.091 | 2.74E-47 | preFC | FSTL3    |
| TIMP2.3    | 1.53E-51 | 0.904132703 | 0.907 | 0.726 | 3.86E-47 | preFC | TIMP2    |
| HMGA1      | 1.87E-51 | 0.348634327 | 0.287 | 0.083 | 4.70E-47 | preFC | HMGA1    |
| EMP3.3     | 7.98E-51 | 0.594126032 | 0.984 | 0.925 | 2.01E-46 | preFC | EMP3     |
| HTRA1.6    | 4.23E-50 | 1.257500375 | 0.923 | 0.822 | 1.06E-45 | preFC | HTRA1    |
| CD59.3     | 4.36E-50 | 0.602335098 | 0.998 | 0.942 | 1.10E-45 | preFC | CD59     |
| DDX5.2     | 8.96E-50 | -0.68178331 | 0.986 | 0.989 | 2.26E-45 | preFC | DDX5     |
| SORBS2.1   | 1.16E-49 | 0.315433927 | 0.46  | 0.18  | 2.92E-45 | preFC | SORBS2   |
| ITGB5.2    | 1.77E-49 | 0.47327983  | 0.597 | 0.289 | 4.46E-45 | preFC | ITGB5    |
| FURIN.1    | 2.31E-48 | 0.537535739 | 0.62  | 0.327 | 5.82E-44 | preFC | FURIN    |
| MT-CO2.4   | 5.25E-48 | 0.694240998 | 0.95  | 0.949 | 1.32E-43 | preFC | MT-CO2   |
| NNMT.5     | 1.31E-46 | -0.9315167  | 0.895 | 0.963 | 3.30E-42 | preFC | NNMT     |
| SHC4       | 5.09E-46 | 0.291112554 | 0.456 | 0.185 | 1.28E-41 | preFC | SHC4     |
| S100A1.5   | 7.71E-46 | 0.600287108 | 0.995 | 0.893 | 1.94E-41 | preFC | S100A1   |
| FGFBP2.4   | 8.10E-46 | 0.7072472   | 1     | 0.96  | 2.04E-41 | preFC | FGFBP2   |
| PLAUR.5    | 1.47E-45 | 0.603195538 | 0.633 | 0.328 | 3.71E-41 | preFC | PLAUR    |
| ADAMTS6.2  | 1.51E-45 | 0.583249285 | 0.727 | 0.411 | 3.79E-41 | preFC | ADAMTS6  |
| RPL10.1    | 1.99E-45 | -0.34520968 | 0.998 | 1     | 5.01E-41 | preFC | RPL10    |
| NPM1.1     | 2.54E-44 | -0.43935303 | 0.984 | 0.995 | 6.40E-40 | preFC | NPM1     |
| VIM.2      | 4.11E-44 | -0.49087115 | 1     | 1     | 1.04E-39 | preFC | VIM      |
| CD55.5     | 6.41E-44 | 1.595404449 | 0.872 | 0.72  | 1.61E-39 | preFC | CD55     |
| RPL5       | 3.37E-43 | -0.35543657 | 1     | 0.999 | 8.50E-39 | preFC | RPL5     |
| SERPINA1.5 | 4.97E-43 | 0.726097069 | 0.998 | 0.967 | 1.25E-38 | preFC | SERPINA1 |



|            |          |             |       |       |          |       |          |
|------------|----------|-------------|-------|-------|----------|-------|----------|
| NGF.3      | 1.45E-42 | 0.766660139 | 0.485 | 0.231 | 3.65E-38 | preFC | NGF      |
| ARPC1B.3   | 3.18E-42 | 0.659567162 | 0.841 | 0.616 | 8.01E-38 | preFC | ARPC1B   |
| EEF2.1     | 2.89E-41 | -0.43356375 | 0.989 | 0.995 | 7.29E-37 | preFC | EEF2     |
| FGF2       | 2.92E-41 | 0.551778609 | 0.768 | 0.502 | 7.36E-37 | preFC | FGF2     |
| TIMP3.4    | 4.25E-41 | 0.570153054 | 0.836 | 0.555 | 1.07E-36 | preFC | TIMP3    |
| FIBIN.3    | 1.03E-40 | -0.9318443  | 0.736 | 0.845 | 2.60E-36 | preFC | FIBIN    |
| PTGES.4    | 2.28E-40 | 0.972883647 | 0.624 | 0.368 | 5.74E-36 | preFC | PTGES    |
| PDLIM7.3   | 8.12E-40 | 0.353017875 | 0.61  | 0.315 | 2.05E-35 | preFC | PDLIM7   |
| CAPS.4     | 8.14E-40 | 0.498364141 | 0.692 | 0.393 | 2.05E-35 | preFC | CAPS     |
| RABAC1.3   | 9.00E-40 | 0.395229159 | 0.993 | 0.961 | 2.27E-35 | preFC | RABAC1   |
| TSPO.2     | 1.50E-39 | 0.406917961 | 0.995 | 0.951 | 3.77E-35 | preFC | TSPO     |
| RPL15.2    | 2.28E-39 | -0.33398646 | 1     | 1     | 5.75E-35 | preFC | RPL15    |
| FGF1.2     | 2.55E-39 | 0.812634526 | 0.747 | 0.465 | 6.44E-35 | preFC | FGF1     |
| RPL10A.1   | 2.76E-39 | -0.32604353 | 1     | 1     | 6.95E-35 | preFC | RPL10A   |
| PMEPA1.1   | 8.15E-39 | 0.670909812 | 0.925 | 0.763 | 2.05E-34 | preFC | PMEPA1   |
| IVNS1ABP.2 | 3.07E-38 | 0.63478603  | 0.904 | 0.745 | 7.72E-34 | preFC | IVNS1ABP |
| HNRNPA1.2  | 3.81E-38 | -0.40347477 | 0.993 | 0.998 | 9.59E-34 | preFC | HNRNPA1  |
| S100A3.1   | 5.69E-38 | 0.529198903 | 0.364 | 0.144 | 1.43E-33 | preFC | S100A3   |
| EIF3E.2    | 9.31E-38 | -0.46477452 | 0.959 | 0.975 | 2.35E-33 | preFC | EIF3E    |
| PCOLCE.5   | 1.79E-37 | -0.85666572 | 0.67  | 0.833 | 4.52E-33 | preFC | PCOLCE   |
| SEMA3C.1   | 3.42E-37 | 0.253228046 | 0.292 | 0.103 | 8.61E-33 | preFC | SEMA3C   |
| DSP        | 6.63E-37 | 0.337087257 | 0.41  | 0.178 | 1.67E-32 | preFC | DSP      |
| CNN3.1     | 8.45E-37 | -0.58554563 | 0.788 | 0.868 | 2.13E-32 | preFC | CNN3     |
| SDC2.5     | 2.05E-36 | -0.54190898 | 0.932 | 0.96  | 5.17E-32 | preFC | SDC2     |
| FXYD5.4    | 8.22E-36 | 0.419000003 | 0.982 | 0.944 | 2.07E-31 | preFC | FXYD5    |
| COLGALT2.1 | 1.08E-35 | 0.480696432 | 0.777 | 0.511 | 2.72E-31 | preFC | COLGALT2 |
| EIF1.2     | 1.53E-35 | -0.35268594 | 1     | 1     | 3.86E-31 | preFC | EIF1     |
| PLP2.3     | 4.48E-35 | 0.505717465 | 0.954 | 0.88  | 1.13E-30 | preFC | PLP2     |
| ID3.2      | 5.21E-35 | -0.93258373 | 0.54  | 0.723 | 1.31E-30 | preFC | ID3      |
| ZFP36.5    | 5.50E-35 | -1.0743913  | 0.913 | 0.957 | 1.38E-30 | preFC | ZFP36    |
| INO80C     | 9.62E-35 | 0.423270937 | 0.499 | 0.255 | 2.42E-30 | preFC | INO80C   |
| CIRBP.1    | 1.32E-34 | -0.42971331 | 0.989 | 0.992 | 3.33E-30 | preFC | CIRBP    |
| PHLDA2.3   | 2.57E-34 | 0.461256057 | 0.815 | 0.57  | 6.46E-30 | preFC | PHLDA2   |
| C1R.6      | 5.25E-34 | -0.74906071 | 0.503 | 0.677 | 1.32E-29 | preFC | C1R      |
| MIA.4      | 5.57E-34 | 0.475225261 | 1     | 0.96  | 1.40E-29 | preFC | MIA      |
| SRSF5.2    | 9.50E-34 | -0.48079127 | 0.979 | 0.985 | 2.39E-29 | preFC | SRSF5    |
| NEBL.1     | 1.28E-33 | 0.380490722 | 0.777 | 0.509 | 3.23E-29 | preFC | NEBL     |
| EEF1A1.1   | 1.56E-33 | -0.30663681 | 1     | 1     | 3.92E-29 | preFC | EEF1A1   |
| RPS13      | 1.59E-33 | -0.29348351 | 1     | 0.999 | 4.00E-29 | preFC | RPS13    |
| VAMP8      | 1.81E-33 | 0.291146871 | 0.567 | 0.293 | 4.57E-29 | preFC | VAMP8    |
| ENO1.1     | 2.67E-33 | -0.45946195 | 0.998 | 0.996 | 6.74E-29 | preFC | ENO1     |
| LTBP1.3    | 2.89E-33 | 0.382174642 | 0.663 | 0.388 | 7.29E-29 | preFC | LTBP1    |
| RPL11      | 5.79E-33 | -0.27360757 | 1     | 1     | 1.46E-28 | preFC | RPL11    |
| FAM129B    | 2.32E-32 | 0.345611853 | 0.606 | 0.343 | 5.85E-28 | preFC | FAM129B  |
| ATP5E.3    | 2.55E-32 | 0.406352589 | 0.982 | 0.956 | 6.43E-28 | preFC | ATP5E    |
| NAP1L1.1   | 2.98E-32 | -0.40610922 | 0.966 | 0.975 | 7.52E-28 | preFC | NAP1L1   |
| CCND1.3    | 1.01E-31 | 0.31162204  | 0.355 | 0.146 | 2.55E-27 | preFC | CCND1    |
| RPL21.1    | 1.08E-31 | -0.27118761 | 1     | 1     | 2.72E-27 | preFC | RPL21    |
| SSR4.2     | 1.20E-31 | 0.385041329 | 0.998 | 0.969 | 3.04E-27 | preFC | SSR4     |
| EFEMP1.5   | 1.94E-31 | -0.73809726 | 0.364 | 0.576 | 4.89E-27 | preFC | EFEMP1   |
| SLC9A3R2   | 2.18E-31 | 0.388050945 | 0.431 | 0.209 | 5.50E-27 | preFC | SLC9A3R2 |
| NT5E.4     | 2.22E-31 | 0.522887274 | 0.711 | 0.475 | 5.60E-27 | preFC | NT5E     |
| ENPP1.2    | 3.23E-31 | 0.788982677 | 0.895 | 0.711 | 8.14E-27 | preFC | ENPP1    |
| LTBP3.2    | 3.83E-31 | 0.423971878 | 0.768 | 0.522 | 9.66E-27 | preFC | LTBP3    |
| FRZB.5     | 4.82E-31 | -1.0608987  | 0.647 | 0.822 | 1.21E-26 | preFC | FRZB     |
| IGFBP3     | 7.44E-31 | 0.469631826 | 0.205 | 0.066 | 1.87E-26 | preFC | IGFBP3   |
| CAPG.3     | 1.22E-30 | 0.362378888 | 0.841 | 0.608 | 3.07E-26 | preFC | CAPG     |
| SH3BGRL3.3 | 1.24E-30 | 0.448012071 | 0.979 | 0.968 | 3.12E-26 | preFC | SH3BGRL3 |
| PRKCDBP.2  | 1.43E-30 | 0.425189819 | 0.923 | 0.768 | 3.60E-26 | preFC | PRKCDBP  |
| EIF4A1.2   | 2.10E-30 | -0.50148083 | 0.938 | 0.958 | 5.28E-26 | preFC | EIF4A1   |

|                 |          |             |       |       |          |       |               |
|-----------------|----------|-------------|-------|-------|----------|-------|---------------|
| MT-CYB.3        | 2.27E-30 | 0.533984565 | 0.959 | 0.947 | 5.73E-26 | preFC | MT-CYB        |
| COL6A3.4        | 2.28E-30 | 0.703522864 | 0.763 | 0.565 | 5.73E-26 | preFC | COL6A3        |
| C4orf48.1       | 3.17E-30 | 0.307429103 | 0.658 | 0.375 | 7.98E-26 | preFC | C4orf48       |
| IFITM3.6        | 4.22E-30 | -0.65313188 | 0.952 | 0.972 | 1.06E-25 | preFC | IFITM3        |
| RPL6.1          | 6.08E-30 | -0.2613601  | 1     | 1     | 1.53E-25 | preFC | RPL6          |
| EIF4A2.2        | 1.02E-29 | -0.44771176 | 0.952 | 0.967 | 2.58E-25 | preFC | EIF4A2        |
| SERPING1.3      | 1.14E-29 | -0.64236932 | 0.829 | 0.866 | 2.88E-25 | preFC | SERPING1      |
| SLC20A1.2       | 1.25E-29 | 0.442894757 | 0.829 | 0.623 | 3.15E-25 | preFC | SLC20A1       |
| LMNA.3          | 1.88E-29 | -0.65820303 | 0.911 | 0.947 | 4.73E-25 | preFC | LMNA          |
| CHST3           | 1.91E-29 | 0.364256686 | 0.738 | 0.475 | 4.80E-25 | preFC | CHST3         |
| RHOD.1          | 1.97E-29 | 0.304984446 | 0.665 | 0.393 | 4.96E-25 | preFC | RHOD          |
| S100A4.6        | 2.16E-29 | 0.779122452 | 0.82  | 0.613 | 5.45E-25 | preFC | S100A4        |
| CCNL1.3         | 2.69E-29 | -0.61005561 | 0.811 | 0.876 | 6.77E-25 | preFC | CCNL1         |
| TSC22D1.4       | 3.38E-29 | -0.75436169 | 0.984 | 0.974 | 8.50E-25 | preFC | TSC22D1       |
| RP11-456H18.2   | 3.54E-29 | 0.309292773 | 0.405 | 0.191 | 8.91E-25 | preFC | RP11-456H18.2 |
| FXVD6.4         | 6.00E-29 | 0.407383273 | 0.973 | 0.873 | 1.51E-24 | preFC | FXVD6         |
| ANK3.4          | 6.46E-29 | 0.326514546 | 0.615 | 0.347 | 1.63E-24 | preFC | ANK3          |
| MT-CO3.4        | 9.78E-29 | 0.576009929 | 0.964 | 0.951 | 2.47E-24 | preFC | MT-CO3        |
| UBC             | 1.28E-28 | -0.60076806 | 0.993 | 0.998 | 3.22E-24 | preFC | UBC           |
| TGFB1.1         | 1.50E-28 | 0.80742542  | 0.72  | 0.482 | 3.77E-24 | preFC | TGFB1         |
| HSP90AB1        | 1.53E-28 | -0.35993624 | 0.989 | 0.997 | 3.86E-24 | preFC | HSP90AB1      |
| CD63.4          | 1.82E-28 | 0.304857331 | 1     | 0.998 | 4.59E-24 | preFC | CD63          |
| HNRNPA0.1       | 2.12E-28 | -0.41284505 | 0.827 | 0.872 | 5.35E-24 | preFC | HNRNPA0       |
| INSIG1.5        | 2.18E-28 | 0.426524402 | 0.747 | 0.495 | 5.49E-24 | preFC | INSIG1        |
| PRDX1.1         | 2.53E-28 | 0.472595728 | 0.989 | 0.958 | 6.36E-24 | preFC | PRDX1         |
| NUCB1           | 2.59E-28 | -0.38444252 | 0.87  | 0.903 | 6.52E-24 | preFC | NUCB1         |
| RPS5.1          | 2.91E-28 | -0.28072564 | 1     | 0.999 | 7.33E-24 | preFC | RPS5          |
| TCEB2.1         | 3.05E-28 | 0.338210179 | 0.973 | 0.938 | 7.67E-24 | preFC | TCEB2         |
| SERPINE1.2      | 3.07E-28 | 0.585467645 | 0.651 | 0.416 | 7.72E-24 | preFC | SERPINE1      |
| HLA-B.1         | 3.14E-28 | -0.43670596 | 0.957 | 0.979 | 7.91E-24 | preFC | HLA-B         |
| GDF10.5         | 3.25E-28 | -0.72462725 | 0.403 | 0.643 | 8.18E-24 | preFC | GDF10         |
| MT-ATP6.3       | 4.05E-28 | 0.49598173  | 0.957 | 0.95  | 1.02E-23 | preFC | MT-ATP6       |
| SQLE.1          | 5.59E-28 | 0.433955038 | 0.565 | 0.326 | 1.41E-23 | preFC | SQLE          |
| SERF2.2         | 6.73E-28 | 0.288295042 | 0.998 | 0.998 | 1.70E-23 | preFC | SERF2         |
| PTGS2           | 9.44E-28 | 0.451585519 | 0.499 | 0.271 | 2.38E-23 | preFC | PTGS2         |
| HLA-C           | 1.13E-27 | -0.36301146 | 0.975 | 0.99  | 2.84E-23 | preFC | HLA-C         |
| ABHD2.1         | 1.20E-27 | 0.35971644  | 0.485 | 0.256 | 3.03E-23 | preFC | ABHD2         |
| RP11-572C15.6.1 | 1.40E-27 | 0.40686454  | 0.563 | 0.337 | 3.54E-23 | preFC | RP11-572C15.6 |
| RPL3.1          | 2.51E-27 | -0.26959797 | 1     | 1     | 6.32E-23 | preFC | RPL3          |
| C9orf16         | 8.05E-27 | 0.347396416 | 0.875 | 0.642 | 2.03E-22 | preFC | C9orf16       |
| SGK1.2          | 1.18E-26 | 0.459983811 | 0.729 | 0.48  | 2.97E-22 | preFC | SGK1          |
| EEF1B2          | 1.90E-26 | -0.30977286 | 0.995 | 0.994 | 4.79E-22 | preFC | EEF1B2        |
| RPS2.2          | 2.04E-26 | -0.32967124 | 1     | 1     | 5.15E-22 | preFC | RPS2          |
| MT-ND4.3        | 2.48E-26 | 0.479391224 | 0.966 | 0.954 | 6.24E-22 | preFC | MT-ND4        |
| HMG2.1          | 2.87E-26 | -0.42241713 | 0.841 | 0.894 | 7.23E-22 | preFC | HMG2          |
| CAPN2.1         | 4.51E-26 | 0.335668751 | 0.713 | 0.46  | 1.14E-21 | preFC | CAPN2         |
| CD81.2          | 4.96E-26 | 0.325653691 | 0.813 | 0.576 | 1.25E-21 | preFC | CD81          |
| HSPD1.1         | 5.51E-26 | -0.45465136 | 0.759 | 0.831 | 1.39E-21 | preFC | HSPD1         |
| SERTAD1.2       | 1.15E-25 | -0.65559636 | 0.759 | 0.828 | 2.89E-21 | preFC | SERTAD1       |
| TM4SF1.3        | 1.27E-25 | 0.448482917 | 0.838 | 0.623 | 3.21E-21 | preFC | TM4SF1        |
| RPS23.1         | 1.33E-25 | -0.26800659 | 1     | 0.999 | 3.34E-21 | preFC | RPS23         |
| ADAMTSL2        | 1.38E-25 | 0.272984144 | 0.383 | 0.181 | 3.48E-21 | preFC | ADAMTSL2      |
| COX7A2          | 2.81E-25 | 0.330362922 | 0.977 | 0.971 | 7.08E-21 | preFC | COX7A2        |
| ATF4            | 3.27E-25 | -0.3678346  | 0.975 | 0.978 | 8.23E-21 | preFC | ATF4          |
| RPL4.1          | 4.92E-25 | -0.28767742 | 1     | 0.998 | 1.24E-20 | preFC | RPL4          |
| CD151.3         | 5.79E-25 | 0.442554335 | 0.934 | 0.838 | 1.46E-20 | preFC | CD151         |
| CCDC80.2        | 1.21E-24 | 0.505092857 | 0.961 | 0.865 | 3.05E-20 | preFC | CCDC80        |
| RPL29.1         | 1.27E-24 | -0.27638985 | 0.995 | 0.998 | 3.20E-20 | preFC | RPL29         |
| SMIM14.1        | 1.94E-24 | 0.460218545 | 0.836 | 0.691 | 4.88E-20 | preFC | SMIM14        |
| EIF4B           | 2.34E-24 | -0.33086424 | 0.825 | 0.862 | 5.91E-20 | preFC | EIF4B         |

|            |          |             |       |       |          |       |           |
|------------|----------|-------------|-------|-------|----------|-------|-----------|
| RPS8       | 2.54E-24 | -0.28035954 | 0.998 | 0.999 | 6.41E-20 | preFC | RPS8      |
| SOCS3.3    | 2.66E-24 | -0.93551762 | 0.736 | 0.81  | 6.70E-20 | preFC | SOCS3     |
| SRSF3.2    | 3.39E-24 | -0.44717885 | 0.945 | 0.963 | 8.55E-20 | preFC | SRSF3     |
| LAPTM4A    | 3.70E-24 | -0.30295816 | 0.989 | 0.993 | 9.32E-20 | preFC | LAPTM4A   |
| ACAT2      | 3.73E-24 | 0.358772821 | 0.456 | 0.242 | 9.40E-20 | preFC | ACAT2     |
| NDUFS8.1   | 4.67E-24 | 0.298206168 | 0.695 | 0.451 | 1.18E-19 | preFC | NDUFS8    |
| HNRNPA2B1  | 9.19E-24 | -0.36773583 | 0.975 | 0.977 | 2.32E-19 | preFC | HNRNPA2B1 |
| PRELP.3    | 9.32E-24 | 0.340814541 | 1     | 0.997 | 2.35E-19 | preFC | PRELP     |
| RHOC.3     | 1.28E-23 | 0.383175291 | 0.95  | 0.875 | 3.23E-19 | preFC | RHOC      |
| PPP1R15A.5 | 1.47E-23 | -0.79871358 | 0.661 | 0.751 | 3.70E-19 | preFC | PPP1R15A  |
| MRPS6.4    | 4.36E-23 | 0.37052427  | 0.877 | 0.686 | 1.10E-18 | preFC | MRPS6     |
| MT1X.3     | 4.48E-23 | -0.7223832  | 0.993 | 0.994 | 1.13E-18 | preFC | MT1X      |
| NRP2.3     | 5.13E-23 | 0.331804559 | 0.54  | 0.317 | 1.29E-18 | preFC | NRP2      |
| FTH1.1     | 6.70E-23 | -0.37678374 | 1     | 1     | 1.69E-18 | preFC | FTH1      |
| BTG1.4     | 8.52E-23 | -0.64764249 | 0.9   | 0.932 | 2.15E-18 | preFC | BTG1      |
| GPC6.3     | 9.07E-23 | -0.46455171 | 0.629 | 0.741 | 2.28E-18 | preFC | GPC6      |
| FDPS       | 4.07E-22 | 0.532211646 | 0.706 | 0.5   | 1.03E-17 | preFC | FDPS      |
| PGK1       | 4.95E-22 | -0.35954203 | 0.968 | 0.98  | 1.25E-17 | preFC | PGK1      |
| ATP1B3     | 5.38E-22 | 0.357560854 | 0.788 | 0.592 | 1.36E-17 | preFC | ATP1B3    |
| OST4.1     | 6.63E-22 | 0.2568099   | 0.995 | 0.983 | 1.67E-17 | preFC | OST4      |
| FUS.1      | 1.16E-21 | -0.40433827 | 0.897 | 0.91  | 2.93E-17 | preFC | FUS       |
| CHPF.1     | 1.63E-21 | 0.358004159 | 0.856 | 0.679 | 4.11E-17 | preFC | CHPF      |
| CNBP       | 3.86E-21 | -0.30487315 | 0.925 | 0.956 | 9.73E-17 | preFC | CNBP      |
| RBMX       | 6.99E-21 | -0.38335337 | 0.768 | 0.818 | 1.76E-16 | preFC | RBMX      |
| SRSF2      | 7.65E-21 | -0.4065897  | 0.811 | 0.854 | 1.93E-16 | preFC | SRSF2     |
| NDUFA1.2   | 1.15E-20 | 0.297852365 | 0.984 | 0.941 | 2.90E-16 | preFC | NDUFA1    |
| MRPL41     | 1.17E-20 | 0.265279215 | 0.827 | 0.616 | 2.94E-16 | preFC | MRPL41    |
| CHI3L2.6   | 1.61E-20 | -1.52133793 | 0.825 | 0.884 | 4.06E-16 | preFC | CHI3L2    |
| PRDX5.1    | 2.15E-20 | 0.291630717 | 0.941 | 0.872 | 5.41E-16 | preFC | PRDX5     |
| GTF3C6     | 2.76E-20 | 0.28585466  | 0.749 | 0.555 | 6.96E-16 | preFC | GTF3C6    |
| MYEOV2     | 2.91E-20 | 0.275448358 | 0.938 | 0.802 | 7.34E-16 | preFC | MYEOV2    |
| PDPN.4     | 3.54E-20 | 0.313632031 | 0.929 | 0.765 | 8.91E-16 | preFC | PDPN      |
| MT-CO1.3   | 3.98E-20 | 0.496308435 | 0.954 | 0.948 | 1.00E-15 | preFC | MT-CO1    |
| TMSB10.4   | 4.35E-20 | 0.477420388 | 0.913 | 0.783 | 1.10E-15 | preFC | TMSB10    |
| ZFAS1.1    | 6.48E-20 | -0.32070476 | 0.961 | 0.977 | 1.63E-15 | preFC | ZFAS1     |
| TSPAN6.3   | 7.70E-20 | 0.38669746  | 0.895 | 0.72  | 1.94E-15 | preFC | TSPAN6    |
| OS9        | 8.32E-20 | -0.30869145 | 0.916 | 0.917 | 2.10E-15 | preFC | OS9       |
| HMGCS1.4   | 1.01E-19 | 0.280784372 | 0.636 | 0.401 | 2.55E-15 | preFC | HMGCS1    |
| MSI2       | 1.04E-19 | 0.253257306 | 0.617 | 0.401 | 2.62E-15 | preFC | MSI2      |
| AMTN.4     | 1.14E-19 | 0.768803502 | 0.241 | 0.106 | 2.88E-15 | preFC | AMTN      |
| LARP6.1    | 1.41E-19 | 0.27144746  | 0.665 | 0.443 | 3.54E-15 | preFC | LARP6     |
| B2M.1      | 1.50E-19 | -0.27701401 | 0.998 | 1     | 3.79E-15 | preFC | B2M       |
| DIO3       | 1.65E-19 | 0.383092946 | 0.116 | 0.035 | 4.17E-15 | preFC | DIO3      |
| EIF3L      | 1.86E-19 | -0.30860119 | 0.913 | 0.916 | 4.70E-15 | preFC | EIF3L     |
| DBI.1      | 2.19E-19 | 0.287272621 | 0.954 | 0.871 | 5.51E-15 | preFC | DBI       |
| RERG       | 2.43E-19 | -0.3766811  | 0.46  | 0.603 | 6.13E-15 | preFC | RERG      |
| UGP2.4     | 2.98E-19 | 0.476977377 | 0.929 | 0.874 | 7.50E-15 | preFC | UGP2      |
| RBM3.1     | 4.82E-19 | -0.31336025 | 0.909 | 0.917 | 1.21E-14 | preFC | RBM3      |
| PNRC1.3    | 4.97E-19 | -0.474241   | 0.708 | 0.779 | 1.25E-14 | preFC | PNRC1     |
| ATOX1.1    | 5.32E-19 | 0.278162017 | 0.863 | 0.698 | 1.34E-14 | preFC | ATOX1     |
| P4HB.2     | 5.60E-19 | -0.33096854 | 0.977 | 0.973 | 1.41E-14 | preFC | P4HB      |
| HLA-A.1    | 5.84E-19 | -0.32027527 | 0.984 | 0.991 | 1.47E-14 | preFC | HLA-A     |
| STK38L.5   | 6.00E-19 | 0.271558197 | 0.893 | 0.677 | 1.51E-14 | preFC | STK38L    |
| SERBP1     | 1.22E-18 | -0.31164816 | 0.891 | 0.915 | 3.08E-14 | preFC | SERBP1    |
| MT-ND3.3   | 1.29E-18 | 0.390861577 | 0.943 | 0.936 | 3.24E-14 | preFC | MT-ND3    |
| S100A10.4  | 1.30E-18 | 0.337908045 | 0.998 | 0.994 | 3.26E-14 | preFC | S100A10   |
| MT-ND5.2   | 1.61E-18 | 0.355820784 | 0.941 | 0.933 | 4.05E-14 | preFC | MT-ND5    |
| TBCB.2     | 2.06E-18 | 0.344372074 | 0.866 | 0.709 | 5.19E-14 | preFC | TBCB      |
| FKBP2.2    | 2.23E-18 | 0.300293552 | 0.936 | 0.837 | 5.63E-14 | preFC | FKBP2     |
| CYB5R3.1   | 2.76E-18 | 0.296860865 | 0.966 | 0.92  | 6.95E-14 | preFC | CYB5R3    |

|             |          |             |       |       |          |       |            |
|-------------|----------|-------------|-------|-------|----------|-------|------------|
| EMC10.1     | 2.90E-18 | 0.292568199 | 0.759 | 0.549 | 7.30E-14 | preFC | EMC10      |
| SLC22A17.2  | 3.12E-18 | 0.314652349 | 0.738 | 0.547 | 7.86E-14 | preFC | SLC22A17   |
| PSAP        | 3.51E-18 | -0.25703527 | 0.995 | 0.991 | 8.83E-14 | preFC | PSAP       |
| DAB2.2      | 3.85E-18 | -0.44081751 | 0.469 | 0.587 | 9.71E-14 | preFC | DAB2       |
| MMP3.5      | 4.71E-18 | -1.71021443 | 0.428 | 0.561 | 1.19E-13 | preFC | MMP3       |
| SSPN        | 4.75E-18 | -0.36535431 | 0.599 | 0.689 | 1.20E-13 | preFC | SSPN       |
| SLC26A2.1   | 4.78E-18 | 0.264131929 | 0.651 | 0.431 | 1.20E-13 | preFC | SLC26A2    |
| ST13        | 5.90E-18 | -0.29648492 | 0.936 | 0.937 | 1.49E-13 | preFC | ST13       |
| RSL24D1.2   | 6.08E-18 | -0.31876793 | 0.868 | 0.886 | 1.53E-13 | preFC | RSL24D1    |
| ZFP36L1.2   | 7.11E-18 | -0.42043217 | 0.688 | 0.779 | 1.79E-13 | preFC | ZFP36L1    |
| HIF1A.1     | 2.07E-17 | -0.40317918 | 0.713 | 0.749 | 5.22E-13 | preFC | HIF1A      |
| CSPG4.1     | 2.08E-17 | 0.323234192 | 0.713 | 0.503 | 5.24E-13 | preFC | CSPG4      |
| SLC39A14.6  | 3.21E-17 | 0.364493722 | 0.861 | 0.746 | 8.09E-13 | preFC | SLC39A14   |
| PABPC1.1    | 4.37E-17 | -0.30939157 | 0.909 | 0.918 | 1.10E-12 | preFC | PABPC1     |
| RPS4X.1     | 4.68E-17 | -0.25201548 | 1     | 1     | 1.18E-12 | preFC | RPS4X      |
| C5orf15.1   | 9.70E-17 | -0.36700386 | 0.649 | 0.716 | 2.44E-12 | preFC | C5orf15    |
| DNAJA1.2    | 9.79E-17 | -0.41815904 | 0.738 | 0.776 | 2.47E-12 | preFC | DNAJA1     |
| SNHG8.3     | 1.18E-16 | -0.37770149 | 0.92  | 0.929 | 2.96E-12 | preFC | SNHG8      |
| CSRNP1.4    | 1.27E-16 | -0.45787218 | 0.658 | 0.711 | 3.21E-12 | preFC | CSRNP1     |
| C2orf40.4   | 1.28E-16 | 0.531628051 | 1     | 0.999 | 3.24E-12 | preFC | C2orf40    |
| ATP5J2.1    | 1.34E-16 | 0.273658986 | 0.891 | 0.78  | 3.39E-12 | preFC | ATP5J2     |
| PTGES3      | 1.36E-16 | -0.27655347 | 0.872 | 0.894 | 3.42E-12 | preFC | PTGES3     |
| FGFR1.4     | 1.63E-16 | 0.319434135 | 0.886 | 0.711 | 4.11E-12 | preFC | FGFR1      |
| COX7A1.2    | 2.76E-16 | 0.307560931 | 0.952 | 0.866 | 6.96E-12 | preFC | COX7A1     |
| MEF2C.4     | 4.19E-16 | 0.257400209 | 0.67  | 0.438 | 1.05E-11 | preFC | MEF2C      |
| SOD1        | 4.25E-16 | -0.25286177 | 0.995 | 0.995 | 1.07E-11 | preFC | SOD1       |
| SRPX2.4     | 4.62E-16 | 0.327035043 | 0.765 | 0.571 | 1.16E-11 | preFC | SRPX2      |
| HSPA8.1     | 6.50E-16 | -0.45719018 | 0.888 | 0.915 | 1.64E-11 | preFC | HSPA8      |
| HLA-E.2     | 6.52E-16 | -0.34886787 | 0.79  | 0.847 | 1.64E-11 | preFC | HLA-E      |
| CSGALNACT1  | 7.36E-16 | -0.34789915 | 0.622 | 0.699 | 1.85E-11 | preFC | CSGALNACT1 |
| IBTK.1      | 7.92E-16 | 0.325751114 | 0.599 | 0.393 | 1.99E-11 | preFC | IBTK       |
| FHL1.1      | 8.37E-16 | -0.43698165 | 0.779 | 0.846 | 2.11E-11 | preFC | FHL1       |
| LRRFIP1.1   | 1.60E-15 | 0.27546996  | 0.897 | 0.757 | 4.03E-11 | preFC | LRRFIP1    |
| HNRNPDL     | 1.61E-15 | -0.30728081 | 0.9   | 0.92  | 4.05E-11 | preFC | HNRNPDL    |
| ACTG1.5     | 1.77E-15 | -0.42478678 | 0.998 | 0.995 | 4.46E-11 | preFC | ACTG1      |
| RARRES2.6   | 2.02E-15 | -0.56881537 | 0.203 | 0.367 | 5.08E-11 | preFC | RARRES2    |
| H3F3B.3     | 2.24E-15 | -0.32923185 | 1     | 1     | 5.65E-11 | preFC | H3F3B      |
| HSPA1A.2    | 2.44E-15 | -0.94784463 | 0.729 | 0.795 | 6.15E-11 | preFC | HSPA1A     |
| SERPINH1.3  | 2.86E-15 | -0.3986431  | 0.499 | 0.601 | 7.20E-11 | preFC | SERPINH1   |
| TNFRSF12A.1 | 3.23E-15 | 0.620279355 | 0.793 | 0.701 | 8.14E-11 | preFC | TNFRSF12A  |
| C6orf48.1   | 4.19E-15 | -0.26266754 | 0.945 | 0.951 | 1.06E-10 | preFC | C6orf48    |
| HNRNPC      | 5.83E-15 | -0.29591115 | 0.925 | 0.939 | 1.47E-10 | preFC | HNRNPC     |
| HNRNPK      | 7.74E-15 | -0.27909998 | 0.92  | 0.929 | 1.95E-10 | preFC | HNRNPK     |
| TF.5        | 9.46E-15 | 0.314830664 | 0.745 | 0.529 | 2.38E-10 | preFC | TF         |
| MALAT1.2    | 1.03E-14 | -0.33313415 | 1     | 1     | 2.60E-10 | preFC | MALAT1     |
| CIB1.1      | 1.07E-14 | 0.270799504 | 0.87  | 0.742 | 2.70E-10 | preFC | CIB1       |
| NCL         | 2.74E-14 | -0.31847833 | 0.884 | 0.896 | 6.89E-10 | preFC | NCL        |
| HNRNPF      | 3.48E-14 | -0.31793084 | 0.633 | 0.686 | 8.76E-10 | preFC | HNRNPF     |
| KCNMA1.1    | 4.02E-14 | 0.403058599 | 0.802 | 0.656 | 1.01E-09 | preFC | KCNMA1     |
| EIF5.2      | 4.23E-14 | -0.3374402  | 0.941 | 0.947 | 1.07E-09 | preFC | EIF5       |
| ACTB.5      | 4.33E-14 | -0.43966303 | 0.993 | 0.997 | 1.09E-09 | preFC | ACTB       |
| JUN.4       | 7.07E-14 | -0.96108047 | 0.916 | 0.926 | 1.78E-09 | preFC | JUN        |
| XBP1.2      | 7.44E-14 | -0.33480319 | 0.936 | 0.94  | 1.87E-09 | preFC | XBP1       |
| IQGAP1.1    | 8.07E-14 | 0.270773978 | 0.759 | 0.596 | 2.03E-09 | preFC | IQGAP1     |
| CSTB.1      | 8.10E-14 | 0.267407458 | 0.909 | 0.837 | 2.04E-09 | preFC | CSTB       |
| HNRNPA3     | 8.31E-14 | -0.27794888 | 0.843 | 0.859 | 2.09E-09 | preFC | HNRNPA3    |
| COL12A1.4   | 1.13E-13 | -0.46313589 | 0.241 | 0.376 | 2.85E-09 | preFC | COL12A1    |
| POLR2L.2    | 1.27E-13 | 0.264018615 | 0.938 | 0.883 | 3.19E-09 | preFC | POLR2L     |
| COL9A3.5    | 1.28E-13 | -0.53796493 | 0.945 | 0.899 | 3.22E-09 | preFC | COL9A3     |
| GEM.5       | 1.36E-13 | -0.70183551 | 0.765 | 0.8   | 3.42E-09 | preFC | GEM        |

|            |          |             |       |       |          |       |          |
|------------|----------|-------------|-------|-------|----------|-------|----------|
| NRN1.3     | 1.53E-13 | -0.37963652 | 0.886 | 0.864 | 3.87E-09 | preFC | NRN1     |
| ATP6V0B    | 1.65E-13 | 0.574036065 | 0.822 | 0.697 | 4.17E-09 | preFC | ATP6V0B  |
| TMEM167A   | 2.20E-13 | 0.255768907 | 0.795 | 0.652 | 5.54E-09 | preFC | TMEM167A |
| MCL1.3     | 2.36E-13 | -0.41266512 | 0.879 | 0.855 | 5.94E-09 | preFC | MCL1     |
| ID2.2      | 3.56E-13 | -0.5290769  | 0.891 | 0.921 | 8.96E-09 | preFC | ID2      |
| FDFT1      | 3.57E-13 | 0.26850598  | 0.608 | 0.427 | 8.98E-09 | preFC | FDFT1    |
| TSPAN2.4   | 5.10E-13 | 0.391354884 | 0.813 | 0.711 | 1.28E-08 | preFC | TSPAN2   |
| GREM1.6    | 5.38E-13 | -0.66676272 | 0.116 | 0.26  | 1.36E-08 | preFC | GREM1    |
| HSPA1B.2   | 6.43E-13 | -0.82446003 | 0.601 | 0.684 | 1.62E-08 | preFC | HSPA1B   |
| EIF4H      | 6.98E-13 | -0.2726841  | 0.781 | 0.773 | 1.76E-08 | preFC | EIF4H    |
| IMPDH2     | 7.40E-13 | -0.27543074 | 0.629 | 0.685 | 1.87E-08 | preFC | IMPDH2   |
| A2M.3      | 8.52E-13 | 0.329429895 | 0.585 | 0.407 | 2.15E-08 | preFC | A2M      |
| CALR       | 8.57E-13 | -0.27890019 | 0.943 | 0.948 | 2.16E-08 | preFC | CALR     |
| RPL17.2    | 1.96E-12 | -0.25308619 | 0.911 | 0.91  | 4.95E-08 | preFC | RPL17    |
| LIF        | 1.97E-12 | 0.349071161 | 0.175 | 0.082 | 4.96E-08 | preFC | LIF      |
| CTSD       | 2.57E-12 | -0.32269434 | 0.902 | 0.925 | 6.47E-08 | preFC | CTSD     |
| CCDC85B.1  | 3.54E-12 | -0.31538507 | 0.738 | 0.766 | 8.92E-08 | preFC | CCDC85B  |
| SBDS       | 3.67E-12 | -0.31176324 | 0.904 | 0.896 | 9.24E-08 | preFC | SBDS     |
| P4HA1.2    | 4.12E-12 | -0.28421011 | 0.829 | 0.829 | 1.04E-07 | preFC | P4HA1    |
| CLK1       | 9.31E-12 | -0.29579105 | 0.679 | 0.725 | 2.35E-07 | preFC | CLK1     |
| IFITM2.6   | 9.49E-12 | -0.51547308 | 0.829 | 0.832 | 2.39E-07 | preFC | IFITM2   |
| MT-ND2.3   | 1.06E-11 | 0.313154509 | 0.954 | 0.95  | 2.66E-07 | preFC | MT-ND2   |
| GLT8D2.1   | 1.08E-11 | -0.28902225 | 0.451 | 0.53  | 2.72E-07 | preFC | GLT8D2   |
| CPQ        | 1.24E-11 | -0.28125758 | 0.613 | 0.648 | 3.12E-07 | preFC | CPQ      |
| HMGB2.1    | 1.62E-11 | -0.31398251 | 0.444 | 0.553 | 4.08E-07 | preFC | HMGB2    |
| EFEMP2.2   | 1.82E-11 | -0.26854911 | 0.706 | 0.719 | 4.59E-07 | preFC | EFEMP2   |
| TIPARP.2   | 1.95E-11 | -0.43087325 | 0.503 | 0.58  | 4.92E-07 | preFC | TIPARP   |
| CDKN1A.5   | 2.21E-11 | -0.4459529  | 0.854 | 0.837 | 5.57E-07 | preFC | CDKN1A   |
| COL6A1.4   | 3.19E-11 | 0.435489672 | 0.875 | 0.839 | 8.04E-07 | preFC | COL6A1   |
| TUBB4B.2   | 3.54E-11 | -0.41008293 | 0.838 | 0.85  | 8.93E-07 | preFC | TUBB4B   |
| MYADM.2    | 4.63E-11 | -0.36988107 | 0.886 | 0.869 | 1.17E-06 | preFC | MYADM    |
| HNRNPU     | 4.71E-11 | -0.2800201  | 0.651 | 0.697 | 1.19E-06 | preFC | HNRNPU   |
| TUBB2B.5   | 5.00E-11 | -0.50365206 | 0.572 | 0.63  | 1.26E-06 | preFC | TUBB2B   |
| SQSTM1.1   | 6.11E-11 | -0.34279168 | 0.909 | 0.924 | 1.54E-06 | preFC | SQSTM1   |
| DDIT3.3    | 6.12E-11 | -0.45522575 | 0.711 | 0.745 | 1.54E-06 | preFC | DDIT3    |
| TUBB       | 6.19E-11 | -0.30816902 | 0.815 | 0.836 | 1.56E-06 | preFC | TUBB     |
| HERPUD1.2  | 6.93E-11 | -0.32436856 | 0.934 | 0.927 | 1.75E-06 | preFC | HERPUD1  |
| ABI3BP.5   | 7.32E-11 | 0.288134231 | 0.679 | 0.481 | 1.84E-06 | preFC | ABI3BP   |
| SBSPON.2   | 8.21E-11 | -0.38334739 | 0.349 | 0.467 | 2.07E-06 | preFC | SBSPON   |
| TNFRSF1A.1 | 1.04E-10 | -0.29821035 | 0.718 | 0.715 | 2.61E-06 | preFC | TNFRSF1A |
| IFRD1.1    | 1.73E-10 | -0.3129903  | 0.599 | 0.645 | 4.35E-06 | preFC | IFRD1    |
| PPP1R10.1  | 1.83E-10 | -0.3341059  | 0.533 | 0.589 | 4.62E-06 | preFC | PPP1R10  |
| ADIRF.2    | 2.41E-10 | -0.43939082 | 0.877 | 0.923 | 6.08E-06 | preFC | ADIRF    |
| ANGPTL4.4  | 2.55E-10 | 0.360599481 | 0.747 | 0.622 | 6.43E-06 | preFC | ANGPTL4  |
| PPP1R3C.5  | 2.56E-10 | -0.6449526  | 0.656 | 0.699 | 6.44E-06 | preFC | PPP1R3C  |
| SOD2.4     | 3.82E-10 | -0.7760653  | 0.829 | 0.858 | 9.62E-06 | preFC | SOD2     |
| COL9A1.6   | 4.42E-10 | -0.47418603 | 0.134 | 0.245 | 1.11E-05 | preFC | COL9A1   |
| PRG4.5     | 4.51E-10 | 0.458990595 | 0.538 | 0.383 | 1.14E-05 | preFC | PRG4     |
| KLF4.4     | 4.52E-10 | -0.5549367  | 0.863 | 0.845 | 1.14E-05 | preFC | KLF4     |
| INHBA.1    | 6.03E-10 | 0.89950059  | 0.795 | 0.696 | 1.52E-05 | preFC | INHBA    |
| CCNB1IP1   | 6.11E-10 | -0.25047994 | 0.437 | 0.518 | 1.54E-05 | preFC | CCNB1IP1 |
| FOSB.4     | 6.20E-10 | -0.79351868 | 0.866 | 0.853 | 1.56E-05 | preFC | FOSB     |
| ID1.2      | 6.42E-10 | -0.49075106 | 0.642 | 0.697 | 1.62E-05 | preFC | ID1      |
| CILP2.5    | 8.73E-10 | -0.61540475 | 0.729 | 0.766 | 2.20E-05 | preFC | CILP2    |
| NDRG2.5    | 9.52E-10 | -0.28666566 | 0.588 | 0.684 | 2.40E-05 | preFC | NDRG2    |
| TUBA1B.2   | 1.17E-09 | -0.32857882 | 0.891 | 0.905 | 2.96E-05 | preFC | TUBA1B   |
| ASS1       | 1.31E-09 | -0.27969093 | 0.585 | 0.623 | 3.30E-05 | preFC | ASS1     |
| TNNT3.2    | 1.49E-09 | -0.5765785  | 0.235 | 0.338 | 3.76E-05 | preFC | TNNT3    |
| SRSF7.3    | 1.72E-09 | -0.44612953 | 0.875 | 0.859 | 4.34E-05 | preFC | SRSF7    |
| COL11A2.5  | 1.83E-09 | -0.34605957 | 0.745 | 0.75  | 4.60E-05 | preFC | COL11A2  |

|                 |          |             |       |       |          |       |               |
|-----------------|----------|-------------|-------|-------|----------|-------|---------------|
| NAMPT.2         | 2.08E-09 | -0.37922788 | 0.378 | 0.453 | 5.24E-05 | preFC | NAMPT         |
| C1orf63         | 2.31E-09 | -0.31074911 | 0.608 | 0.649 | 5.82E-05 | preFC | C1orf63       |
| SNHG7           | 3.88E-09 | -0.25752211 | 0.59  | 0.619 | 9.77E-05 | preFC | SNHG7         |
| LBH.2           | 4.25E-09 | -0.42443475 | 0.421 | 0.488 | 0.000107 | preFC | LBH           |
| CHI3L1.6        | 4.31E-09 | -1.43605879 | 0.754 | 0.789 | 0.000109 | preFC | CHI3L1        |
| ADM.4           | 4.94E-09 | -0.50223804 | 0.392 | 0.487 | 0.000125 | preFC | ADM           |
| LIMA1.1         | 4.97E-09 | -0.33603554 | 0.353 | 0.438 | 0.000125 | preFC | LIMA1         |
| RBP4.6          | 6.23E-09 | 0.340081316 | 0.811 | 0.704 | 0.000157 | preFC | RBP4          |
| RP11-983P16.4.4 | 6.48E-09 | -0.29412161 | 0.478 | 0.553 | 0.000163 | preFC | RP11-983P16.4 |
| TPM2.2          | 7.58E-09 | -0.29384413 | 0.829 | 0.83  | 0.000191 | preFC | TPM2          |
| SNAI2.4         | 7.60E-09 | -0.39026156 | 0.533 | 0.592 | 0.000191 | preFC | SNAI2         |
| COL9A2.5        | 8.87E-09 | -0.61696285 | 0.736 | 0.693 | 0.000224 | preFC | COL9A2        |
| HMOX1.2         | 1.12E-08 | -0.98378016 | 0.289 | 0.386 | 0.000281 | preFC | HMOX1         |
| ITM2A.5         | 1.19E-08 | -0.50259829 | 0.74  | 0.698 | 0.0003   | preFC | ITM2A         |
| THBS1.2         | 1.23E-08 | -0.33054553 | 0.337 | 0.455 | 0.00031  | preFC | THBS1         |
| CDO1.3          | 1.61E-08 | -0.29140794 | 0.97  | 0.962 | 0.000406 | preFC | CDO1          |
| SLC40A1.2       | 2.77E-08 | -0.38560896 | 0.262 | 0.349 | 0.000699 | preFC | SLC40A1       |
| TGFBI.6         | 3.19E-08 | -0.36873267 | 0.585 | 0.384 | 0.000805 | preFC | TGFBI         |
| DNAJB1.2        | 3.93E-08 | -0.53616465 | 0.731 | 0.763 | 0.000991 | preFC | DNAJB1        |
| GBP2.3          | 4.33E-08 | -0.31749549 | 0.403 | 0.474 | 0.00109  | preFC | GBP2          |
| GBE1            | 4.63E-08 | -0.29752153 | 0.51  | 0.538 | 0.001167 | preFC | GBE1          |
| EPB41L2.2       | 5.65E-08 | -0.27177005 | 0.554 | 0.586 | 0.001422 | preFC | EPB41L2       |
| NASP            | 5.82E-08 | -0.26589251 | 0.465 | 0.513 | 0.001467 | preFC | NASP          |
| WWP2.5          | 5.96E-08 | -0.36702355 | 0.891 | 0.836 | 0.001502 | preFC | WWP2          |
| ARID5B.3        | 6.85E-08 | -0.43629305 | 0.64  | 0.646 | 0.001726 | preFC | ARID5B        |
| HSP90AA1        | 8.09E-08 | -0.29726116 | 0.986 | 0.985 | 0.00204  | preFC | HSP90AA1      |
| PNN             | 1.08E-07 | -0.2600833  | 0.695 | 0.688 | 0.002712 | preFC | PNN           |
| DDIT4.3         | 1.16E-07 | -0.67610791 | 0.433 | 0.525 | 0.00293  | preFC | DDIT4         |
| G0S2.1          | 1.18E-07 | 0.412842316 | 0.301 | 0.194 | 0.002976 | preFC | G0S2          |
| COL2A1.4        | 1.30E-07 | -0.77445989 | 0.943 | 0.932 | 0.003276 | preFC | COL2A1        |
| MAOB            | 1.50E-07 | -0.28693294 | 0.412 | 0.473 | 0.003787 | preFC | MAOB          |
| CD14            | 1.57E-07 | -0.4042245  | 0.371 | 0.45  | 0.003962 | preFC | CD14          |
| LIMCH1          | 1.60E-07 | -0.26319466 | 0.581 | 0.614 | 0.004039 | preFC | LIMCH1        |
| ARID5A.1        | 1.83E-07 | -0.33502473 | 0.408 | 0.467 | 0.004607 | preFC | ARID5A        |
| NR4A2.3         | 1.90E-07 | -0.38735317 | 0.588 | 0.624 | 0.004779 | preFC | NR4A2         |
| ADSSL1          | 1.91E-07 | -0.26349894 | 0.415 | 0.486 | 0.0048   | preFC | ADSSL1        |
| TPD52L1.3       | 2.11E-07 | -0.3349394  | 0.788 | 0.779 | 0.005316 | preFC | TPD52L1       |
| CYR61.6         | 2.42E-07 | -0.62221035 | 0.941 | 0.941 | 0.006088 | preFC | CYR61         |
| HSPA5           | 2.83E-07 | -0.26037481 | 0.913 | 0.911 | 0.00712  | preFC | HSPA5         |
| OSMR.3          | 2.92E-07 | -0.32913722 | 0.572 | 0.597 | 0.007358 | preFC | OSMR          |
| JUNB.5          | 3.48E-07 | -0.55058623 | 1     | 0.994 | 0.008777 | preFC | JUNB          |
| SERPINB1        | 6.21E-07 | -0.31295569 | 0.519 | 0.549 | 0.015642 | preFC | SERPINB1      |
| SERTAD4-AS1.3   | 6.65E-07 | -0.3043754  | 0.638 | 0.649 | 0.016762 | preFC | SERTAD4-AS1   |
| RGS16.5         | 6.94E-07 | -0.66479408 | 0.708 | 0.743 | 0.01749  | preFC | RGS16         |
| BAG3            | 7.01E-07 | -0.32361891 | 0.567 | 0.574 | 0.017674 | preFC | BAG3          |
| MAFB.4          | 8.86E-07 | -0.38406377 | 0.212 | 0.296 | 0.022329 | preFC | MAFB          |
| GTF2B           | 9.36E-07 | -0.28672285 | 0.46  | 0.496 | 0.023573 | preFC | GTF2B         |
| MATN3.6         | 1.20E-06 | -0.66892116 | 0.535 | 0.557 | 0.030141 | preFC | MATN3         |
| BRD2            | 1.28E-06 | -0.27906846 | 0.743 | 0.724 | 0.032358 | preFC | BRD2          |
| TXNIP.2         | 1.38E-06 | -0.39348113 | 0.449 | 0.501 | 0.034815 | preFC | TXNIP         |
| PDK4.3          | 1.42E-06 | -0.43444311 | 0.171 | 0.26  | 0.035766 | preFC | PDK4          |
| HSPB1.4         | 1.52E-06 | -0.31358056 | 0.938 | 0.948 | 0.038221 | preFC | HSPB1         |
| MYC.2           | 1.69E-06 | -0.48676826 | 0.244 | 0.316 | 0.042646 | preFC | MYC           |
| NFKBIA.4        | 2.23E-06 | -0.7385865  | 0.872 | 0.882 | 0.056064 | preFC | NFKBIA        |
| MAP2K3          | 2.73E-06 | -0.26174586 | 0.478 | 0.503 | 0.068696 | preFC | MAP2K3        |
| HEXIM1.2        | 3.85E-06 | -0.29601506 | 0.547 | 0.56  | 0.096936 | preFC | HEXIM1        |
| ICAM1.5         | 4.58E-06 | -0.68081611 | 0.487 | 0.516 | 0.115329 | preFC | ICAM1         |
| COL6A2.5        | 5.46E-06 | 0.25525679  | 0.895 | 0.888 | 0.137473 | preFC | COL6A2        |
| IFI16.1         | 5.97E-06 | -0.25853015 | 0.317 | 0.369 | 0.150417 | preFC | IFI16         |
| SLC3A2          | 7.01E-06 | -0.27717436 | 0.544 | 0.566 | 0.176615 | preFC | SLC3A2        |

|            |          |             |       |       |          |       |          |
|------------|----------|-------------|-------|-------|----------|-------|----------|
| GADD45A.1  | 1.01E-05 | -0.27773904 | 0.428 | 0.483 | 0.25502  | preFC | GADD45A  |
| CTGF.4     | 1.15E-05 | -0.33626631 | 0.97  | 0.982 | 0.289819 | preFC | CTGF     |
| CLU.6      | 1.29E-05 | -0.33434738 | 1     | 1     | 0.325724 | preFC | CLU      |
| ASPN.4     | 1.79E-05 | -0.99501939 | 0.622 | 0.607 | 0.450285 | preFC | ASPN     |
| PGAM1.1    | 1.80E-05 | 0.337203226 | 0.948 | 0.932 | 0.452413 | preFC | PGAM1    |
| ANGPTL2.3  | 2.41E-05 | -0.27015274 | 0.95  | 0.9   | 0.606496 | preFC | ANGPTL2  |
| SNAPC1     | 2.97E-05 | -0.25833915 | 0.563 | 0.564 | 0.747707 | preFC | SNAPC1   |
| IRF1.3     | 2.99E-05 | -0.51222636 | 0.465 | 0.508 | 0.753244 | preFC | IRF1     |
| RGS3.3     | 3.12E-05 | -0.34731992 | 0.852 | 0.81  | 0.785071 | preFC | RGS3     |
| NFKBIZ.5   | 3.24E-05 | -0.46883472 | 0.499 | 0.518 | 0.81632  | preFC | NFKBIZ   |
| PHLDA1.3   | 3.96E-05 | -0.37780518 | 0.772 | 0.744 | 0.997009 | preFC | PHLDA1   |
| GLI3.3     | 4.25E-05 | -0.2528384  | 0.426 | 0.446 | 1        | preFC | GLI3     |
| GADD45B.6  | 4.25E-05 | -0.68618265 | 0.923 | 0.92  | 1        | preFC | GADD45B  |
| ARRDC3.1   | 5.00E-05 | -0.26716756 | 0.301 | 0.359 | 1        | preFC | ARRDC3   |
| CHMP1B     | 7.11E-05 | -0.25029708 | 0.636 | 0.612 | 1        | preFC | CHMP1B   |
| SLPI.4     | 8.03E-05 | -0.33459694 | 0.323 | 0.224 | 1        | preFC | SLPI     |
| DLX5.4     | 0.000104 | -0.30934393 | 0.472 | 0.492 | 1        | preFC | DLX5     |
| CLEC3A.6   | 0.000121 | -0.65558202 | 0.815 | 0.748 | 1        | preFC | CLEC3A   |
| RASD1.6    | 0.000154 | -0.64754549 | 0.599 | 0.641 | 1        | preFC | RASD1    |
| PGAM2      | 0.00017  | 0.350989856 | 0.123 | 0.075 | 1        | preFC | PGAM2    |
| VASN.1     | 0.000193 | -0.25425388 | 0.752 | 0.712 | 1        | preFC | VASN     |
| TAC1.1     | 0.000223 | 0.596047214 | 0.112 | 0.067 | 1        | preFC | TAC1     |
| PIK3R1.2   | 0.00024  | -0.3214892  | 0.346 | 0.386 | 1        | preFC | PIK3R1   |
| ATF3.6     | 0.000342 | -0.52891537 | 0.581 | 0.587 | 1        | preFC | ATF3     |
| HILPDA     | 0.000349 | -0.36496689 | 0.301 | 0.34  | 1        | preFC | HILPDA   |
| TPM4.3     | 0.000362 | -0.27274464 | 0.665 | 0.651 | 1        | preFC | TPM4     |
| WTAP.2     | 0.000386 | -0.2734204  | 0.679 | 0.657 | 1        | preFC | WTAP     |
| TCF4.4     | 0.000403 | -0.25209562 | 0.62  | 0.597 | 1        | preFC | TCF4     |
| CRISPLD1.5 | 0.000559 | -0.51118501 | 0.446 | 0.509 | 1        | preFC | CRISPLD1 |
| CA9        | 0.00057  | -0.27567418 | 0.374 | 0.404 | 1        | preFC | CA9      |
| PART1.4    | 0.000617 | -0.35090617 | 0.412 | 0.44  | 1        | preFC | PART1    |
| FSTL1.4    | 0.000649 | -0.27642845 | 0.683 | 0.666 | 1        | preFC | FSTL1    |
| TMSB4X.6   | 0.000785 | -0.75392542 | 0.838 | 0.775 | 1        | preFC | TMSB4X   |
| KLF10.5    | 0.00087  | -0.34578968 | 0.62  | 0.596 | 1        | preFC | KLF10    |
| ANXA1.2    | 0.001018 | -0.26515485 | 0.984 | 0.979 | 1        | preFC | ANXA1    |
| HAPLN1.5   | 0.001062 | -0.41955267 | 0.995 | 0.95  | 1        | preFC | HAPLN1   |
| FOS.5      | 0.001073 | -0.54403312 | 0.991 | 0.979 | 1        | preFC | FOS      |
| COL1A1.6   | 0.001251 | -1.21177701 | 0.2   | 0.135 | 1        | preFC | COL1A1   |
| NR4A1.6    | 0.001271 | -0.48236291 | 0.592 | 0.593 | 1        | preFC | NR4A1    |
| MT1E.3     | 0.001448 | -0.25363647 | 0.977 | 0.991 | 1        | preFC | MT1E     |
| GPRC5A.2   | 0.001521 | -0.26931893 | 0.522 | 0.526 | 1        | preFC | GPRC5A   |
| VCAM1.6    | 0.001833 | -0.53889765 | 0.13  | 0.178 | 1        | preFC | VCAM1    |
| RPS4Y1     | 0.001951 | -0.30929616 | 0.292 | 0.339 | 1        | preFC | RPS4Y1   |
| ERRFI1.2   | 0.002045 | -0.45766274 | 0.827 | 0.784 | 1        | preFC | ERRFI1   |
| MIR24-2.3  | 0.002192 | -0.47762544 | 0.745 | 0.688 | 1        | preFC | MIR24-2  |
| CYP1B1.2   | 0.002203 | -0.3121253  | 0.342 | 0.37  | 1        | preFC | CYP1B1   |
| AQP1.5     | 0.002257 | -0.25576342 | 0.159 | 0.105 | 1        | preFC | AQP1     |
| OGN.5      | 0.004099 | -0.40549675 | 0.79  | 0.814 | 1        | preFC | OGN      |
| MEG3.4     | 0.004466 | -0.30064184 | 0.49  | 0.518 | 1        | preFC | MEG3     |
| SLC25A37.3 | 0.004728 | -0.26581666 | 0.854 | 0.814 | 1        | preFC | SLC25A37 |
| KCNQ1OT1   | 0.005105 | -0.27351473 | 0.61  | 0.605 | 1        | preFC | KCNQ1OT1 |
| CRTAC1.4   | 0.006784 | -0.45469248 | 0.815 | 0.751 | 1        | preFC | CRTAC1   |
| SPARC.3    | 0.007773 | -0.4058596  | 0.991 | 0.976 | 1        | preFC | SPARC    |
